# Supplementary material for: Dynamic Changes of DNA Methylation and Transcriptome Expression in Porcine Ovaries during Aging
Source: Biomed Res Int. 2019 Oct 30;2019:8732023. doi: 10.1155/2019/8732023 (PMC6874880; doi:10.1155/2019/8732023)
Supplement: Supplementary Materials — Table S1: primer sequences for q-PCR. Table S2: summary of sequence data and read-alignment statistics. Table S3: percentage of cytosine methylation after extraction. Table S4: association analysis of regulated genes between both ovarian development stages. Table S5: overlap between different methylation regions and differentially expressed genes. Figure S1: DNA methylation levels of CpG CHG and CHH on each chromosome. Figure S2: Pearson's correlation between DNA methylation level and chromosomal features. (A) Scatter plot and trend line (Pearson's correlation), indicating the correlation between the chromosome length and methylation level. (B) Scatter plot and trend line (Pearson's correlation), indicating the correlation between the chromosome GC content and methylation level. (C) Scatter plot and trend line (Pearson's correlation), indicating the correlation between the gene number in chromosome and methylation. (D) Scatter plot and trend line (Pearson's correlation), indicating the correlation between the chromosome CGI ratio and methylation level. (E) Scatter plot and trend line (Pearson's correlation), indicating the correlation between the chromosome repeat number and methylation level. Figure S3: verification of whole genome bisulfite and RNA sequencing data. (A) DNA methylation was verified via bisulfite sequencing PCR. The expression levels of mRNAs (B), miRNAs (C), lncRNAs (D), and circRNAs (E) were verified via q-PCR and adjusted by three endogenous control genes (porcine GAPDH, ACTB, and U6 snRNA). Figure S4: DNA methylation levels and RNA expression levels on each chromosome. Supplementary Database S1: summary and function enrichment of different methylation regions. Supplementary Database S2: identified mRNAs, miRNAs, lncRNAs, and circRNAs in all samples. Supplementary Database S3: differentially expressed mRNAs, miRNAs, lncRNAs, and circRNAs between both stages. Supplementary Database S4: GO analysis of differentially expressed RNAs and function over [file 8732023.f1.zip › 8732023.f1/Supplementary Database 1.xlsx]

## Sheet:  Summary of DMRs
Summary of DMRs
NO	Chromosome	Start	End	Length	Number of CpG	Mean methylation level of YP	Mean methylation level of OP	Different methylation	Hypermethylation ↑Hypomethylation ↓
1	chr7	134201032	134201132	101	8	0.273352	0.94474	-0.671388	↑
2	chr1	218716090	218717492	1403	6	0.0453142	0.896626	-0.851312	↑
3	chr13	5793342	5793443	102	7	0.0733878	0.93287	-0.859482	↑
4	chr10	5836789	5836952	164	9	0.30533	0.813172	-0.507842	↑
5	chr2	133608399	133608616	218	4	0.0731118	0.958756	-0.885644	↑
6	chr2	110008731	110009346	616	5	0.0673768	0.885526	-0.81815	↑
7	chr16	38308585	38308997	413	6	0.054517	0.840194	-0.785677	↑
8	chrX	10564555	10564640	86	6	0.0739014	0.847472	-0.773571	↑
9	chr7	49645713	49645813	101	8	0.271407	0.904865	-0.633458	↑
10	chr2	114874172	114874560	389	8	0.0610355	0.737484	-0.676449	↑
11	chr16	50212780	50213290	511	6	0.082582	0.892838	-0.810256	↑
12	chr7	55451339	55452024	686	9	0.277387	0.891749	-0.614362	↑
13	chr3	79837800	79837862	63	4	0.0490841	0.908211	-0.859126	↑
14	chr12	12594454	12594566	113	11	0.376351	0.911583	-0.535232	↑
15	chrX	5891753	5891851	99	15	0.475067	0.868871	-0.393805	↑
16	chr3	94152314	94152741	428	4	0.062436	0.891145	-0.828709	↑
17	chr1	142962511	142962581	71	4	0.885387	0.0545832	0.830804	↓
18	chr2	50949493	50949558	66	4	0.885924	0.0667391	0.819185	↓
19	chr1	34600193	34600286	94	4	0.0593193	0.925208	-0.865888	↑
20	chr7	94803242	94803880	639	6	0.0617005	0.80186	-0.74016	↑
21	chr1	185884836	185885717	882	6	0.831187	0.090227	0.74096	↓
22	chr11	24198381	24198452	72	6	0.112192	0.917442	-0.80525	↑
23	chr1	20362057	20362184	128	4	0.0583501	0.868779	-0.810429	↑
24	chr4	22199588	22199981	394	7	0.0933025	0.719523	-0.626221	↑
25	chr9	25840851	25840938	88	6	0.71038	0.0768457	0.633535	↓
26	chr2	122156110	122156237	128	4	0.14481	0.949233	-0.804424	↑
27	chr7	90320978	90321313	336	4	0.143383	0.933666	-0.790282	↑
28	chr1	199337872	199338097	226	6	0.058206	0.785714	-0.727508	↑
29	chr15	141374734	141375044	311	8	0.0758573	0.684278	-0.60842	↑
30	chr9	140561005	140561186	182	5	0.805677	0.067992	0.737685	↓
31	chr10	76831045	76831099	55	4	0.0592164	0.902055	-0.842839	↑
32	chr6	146654307	146654723	417	4	0.0484617	0.922937	-0.874475	↑
33	chr1	185880712	185880799	88	5	0.836538	0.0948766	0.741662	↓
34	chr17	47235280	47235341	62	7	0.336614	0.943102	-0.606488	↑
35	chr1	206737559	206737615	57	7	0.097212	0.856915	-0.759703	↑
36	chr9	16206001	16206484	484	6	0.0618064	0.788477	-0.726671	↑
37	GL895308-2	295171	296548	1378	4	0.117006	0.927025	-0.81002	↑
38	chr3	122222200	122222273	74	7	0.425645	0.820723	-0.395078	↑
39	chr1	34629967	34630034	68	4	0.86978	0.0991592	0.770621	↓
40	chr5	92014575	92014700	126	4	0.0547457	0.850671	-0.795925	↑
41	chr8	79314978	79315196	219	6	0.0692191	0.750782	-0.681562	↑
42	chr2	19058009	19058239	231	5	0.895806	0.128881	0.766925	↓
43	chr5	86664321	86665736	1416	7	0.714853	0.0868937	0.627959	↓
44	chr1	34728456	34728540	85	5	0.141719	0.925805	-0.784086	↑
45	chr5	87941976	87942071	96	8	0.407048	0.940458	-0.533411	↑
46	chr15	16731821	16732814	994	5	0.0770495	0.805558	-0.728508	↑
47	GL894982-1	33990	34070	81	4	0.911784	0.117717	0.794067	↓
48	chr2	161716880	161717297	418	4	0.0517114	0.841847	-0.790136	↑
49	chr9	135521612	135524705	3094	6	0.0623131	0.758686	-0.696373	↑
50	chr13	13790465	13790699	235	6	0.0567905	0.719493	-0.662702	↑
51	chr5	27058942	27059134	193	4	0.0786301	0.816537	-0.737907	↑
52	chr18	36451449	36451586	138	4	0.0870362	0.94792	-0.860884	↑
53	chr18	25055640	25055830	191	4	0.787036	0.0691761	0.71786	↓
54	chr11	11335199	11335259	61	7	0.68719	0.155931	0.53126	↓
55	chr2	23496863	23497199	337	4	0.849191	0.0649844	0.784206	↓
56	chr15	140265771	140265838	68	7	0.292695	0.790888	-0.498193	↑
57	chr10	1123465	1123584	120	7	0.76037	0.177205	0.583165	↓
58	chr15	151280151	151280245	95	10	0.249105	0.685894	-0.436789	↑
59	chr15	1923056	1923364	309	5	0.211714	0.937867	-0.726153	↑
60	chr5	107541279	107541363	85	4	0.0586768	0.778919	-0.720242	↑
61	chr10	1543983	1544257	275	5	0.129362	0.794342	-0.66498	↑
62	chr2	30765145	30765491	347	5	0.0675422	0.818086	-0.750544	↑
63	chr9	143532745	143532938	194	4	0.0722822	0.86024	-0.787958	↑
64	chr6	112786819	112787009	191	4	0.200842	0.961162	-0.76032	↑
65	chr3	94216469	94217105	637	4	0.0478666	0.799791	-0.751925	↑
66	chr9	7253694	7253755	62	7	0.172142	0.70099	-0.528848	↑
67	chr3	75759006	75759056	51	7	0.469303	0.939775	-0.470472	↑
68	chr7	115050804	115051028	225	4	0.0870302	0.926332	-0.839302	↑
69	chr16	62877633	62877739	107	4	0.0816003	0.84117	-0.75957	↑
70	chr3	113588126	113588404	279	4	0.957978	0.194876	0.763102	↓
71	chr1	16134881	16134982	102	7	0.677705	0.152852	0.524853	↓
72	chr3	7524412	7524689	278	4	0.0522802	0.811708	-0.759427	↑
73	chr6	147959204	147959377	174	4	0.139485	0.965679	-0.826194	↑
74	chr6	149276141	149276793	653	5	0.139214	0.899952	-0.760737	↑
75	chr5	87579981	87580275	295	4	0.0764714	0.811862	-0.735391	↑
76	chr11	29710669	29711327	659	5	0.0814553	0.872982	-0.791527	↑
77	chr15	157281567	157281625	59	4	0.044355	0.818177	-0.773822	↑
78	chrX	5252443	5252528	86	7	0.267202	0.867794	-0.600593	↑
79	chr1	36619644	36619809	166	5	0.791547	0.0903959	0.701151	↓
80	chr1	138755596	138757674	2079	5	0.74141	0.100513	0.640897	↓
81	chr10	62816790	62817164	375	5	0.910203	0.107307	0.802896	↓
82	chr10	5931448	5932803	1356	6	0.154131	0.818125	-0.663994	↑
83	chr1	248362341	248362688	348	5	0.151074	0.893045	-0.741972	↑
84	chr2	30761194	30761408	215	5	0.10373	0.815496	-0.711766	↑
85	chr1	147034549	147034806	258	4	0.803841	0.080047	0.723794	↓
86	chr1	71859495	71859656	162	5	0.0627433	0.781359	-0.718616	↑
87	chr16	11956222	11956281	60	4	0.0699882	0.868111	-0.798122	↑
88	chr18	40393926	40394149	224	4	0.0866081	0.882282	-0.795674	↑
89	chr7	16546341	16547282	942	4	0.130485	0.951357	-0.820871	↑
90	chr16	80693498	80693704	207	5	0.16169	0.912244	-0.750555	↑
91	chr11	25255191	25255377	187	5	0.219791	0.909336	-0.689546	↑
92	chr2	117188190	117188320	131	4	0.17155	0.927102	-0.755552	↑
93	chr13	132523966	132524328	363	4	0.205722	0.958241	-0.752519	↑
94	chr3	94707386	94707607	222	4	0.119881	0.851728	-0.731847	↑
95	chr6	129804390	129804618	229	4	0.786068	0.065654	0.720414	↓
96	chr6	109522327	109522389	63	4	0.040432	0.708652	-0.66822	↑
97	chr2	110111543	110112360	818	4	0.0575282	0.729607	-0.672078	↑
98	chr6	126590051	126590400	350	5	0.155119	0.810204	-0.655085	↑
99	chr5	107529329	107529712	384	5	0.17033	0.848926	-0.678596	↑
100	chr14	10310495	10310756	262	4	0.112066	0.963084	-0.851018	↑
101	chr1	255214910	255215058	149	4	0.157148	0.910746	-0.753599	↑
102	chr18	37682931	37682998	68	4	0.0706889	0.78538	-0.714691	↑
103	chr4	86682776	86682849	74	5	0.70706	0.0816822	0.625378	↓
104	chr1	26470093	26470528	436	4	0.834605	0.0938404	0.740765	↓
105	chr15	88544956	88545046	91	5	0.123388	0.914079	-0.790691	↑
106	chr16	24705654	24705786	133	6	0.277077	0.868053	-0.590976	↑
107	chr5	102256214	102256433	220	6	0.703257	0.102679	0.600578	↓
108	chr3	76440173	76440497	325	4	0.0773332	0.81468	-0.737346	↑
109	chr11	74273970	74274048	79	6	0.428876	0.94451	-0.515635	↑
110	chr14	67986561	67986745	185	4	0.0509528	0.842158	-0.791205	↑
111	chr7	20985458	20985554	97	4	0.928776	0.180681	0.748094	↓
112	chr3	77300967	77301258	292	4	0.0467554	0.79122	-0.744465	↑
113	chr5	96357338	96357418	81	7	0.118097	0.639861	-0.521764	↑
114	chr5	87438179	87438367	189	4	0.0892937	0.745712	-0.656418	↑
115	chr3	70509044	70509137	94	4	0.0801059	0.821661	-0.741555	↑
116	chr13	143078075	143078232	158	4	0.944761	0.130121	0.81464	↓
117	chr18	29074352	29074572	221	4	0.068244	0.788573	-0.720329	↑
118	chr10	43812941	43813005	65	4	0.883379	0.0833272	0.800052	↓
119	chr1	23854555	23854874	320	4	0.901227	0.211489	0.689737	↓
120	GL892391-1	2962	3017	56	6	0.433949	0.897317	-0.463368	↑
121	chr4	16510470	16510562	93	7	0.802646	0.216697	0.585949	↓
122	chr9	44695904	44696347	444	5	0.858071	0.101287	0.756785	↓
123	chr16	15226834	15227870	1037	5	0.0523731	0.64697	-0.594597	↑
124	chr3	65352892	65353166	275	4	0.0588673	0.718789	-0.659922	↑
125	chr14	99909651	99909959	309	6	0.258142	0.786714	-0.528573	↑
126	chr7	18458130	18458302	173	5	0.06273	0.726849	-0.664119	↑
127	chr17	65357773	65357928	156	4	0.0570938	0.774701	-0.717607	↑
128	chr9	151652340	151652424	85	5	0.161635	0.837292	-0.675657	↑
129	GL894567-2	53723	53783	61	4	0.828543	0.272187	0.556357	↓
130	chr12	6894499	6894569	71	5	0.113117	0.861928	-0.74881	↑
131	chr13	189754536	189755042	507	4	0.751889	0.0545729	0.697316	↓
132	chr14	12589297	12589422	126	4	0.0798851	0.837332	-0.757447	↑
133	GL893951-2	40724	41371	648	4	0.0593439	0.804385	-0.745041	↑
134	chr3	94240952	94241105	154	4	0.101013	0.848409	-0.747395	↑
135	chr3	94226222	94226344	123	4	0.0477622	0.765073	-0.717311	↑
136	chr9	75850504	75851120	617	4	0.0592294	0.820647	-0.761418	↑
137	chr3	27330444	27330550	107	5	0.237608	0.891633	-0.654025	↑
138	chr10	2028671	2028725	55	5	0.929288	0.211777	0.71751	↓
139	chr4	129824743	129824809	67	5	0.406229	0.940266	-0.534037	↑
140	chr15	1424626	1424886	261	9	0.525972	0.864852	-0.33888	↑
141	chr18	59094557	59094615	59	4	0.0440961	0.719898	-0.675802	↑
142	GL895120-1	20801	20973	173	4	0.153462	0.833855	-0.680393	↑
143	chr1	23394941	23395353	413	4	0.794803	0.0770008	0.717802	↓
144	chr9	138643680	138643858	179	4	0.177168	0.879267	-0.702099	↑
145	chr5	99207694	99207940	247	4	0.752751	0.0792196	0.673532	↓
146	chr13	2692758	2692816	59	7	0.22181	0.818346	-0.596536	↑
147	chr1	34532561	34534091	1531	4	0.0752895	0.877538	-0.802248	↑
148	chr18	42599097	42599632	536	4	0.0663134	0.779223	-0.71291	↑
149	chr5	87866091	87866142	52	4	0.302245	0.95782	-0.655576	↑
150	chr15	135119928	135120103	176	4	0.0454612	0.741118	-0.695657	↑
151	chr13	111938622	111939136	515	4	0.0603248	0.795992	-0.735667	↑
152	chr13	119017887	119018017	131	5	0.0496547	0.717292	-0.667637	↑
153	chr2	102456218	102456399	182	4	0.729896	0.0590545	0.670841	↓
154	chr1	97198005	97198230	226	4	0.0632735	0.785844	-0.72257	↑
155	chr15	14670399	14670464	66	7	0.276794	0.775815	-0.499021	↑
156	chr4	17269869	17269919	51	8	0.735664	0.323083	0.412581	↓
157	chr1	62495652	62495727	76	7	0.882261	0.408434	0.473827	↓
158	chr1	26589501	26589857	357	4	0.290997	0.962428	-0.671431	↑
159	chr1	31515140	31515325	186	4	0.057206	0.762922	-0.705716	↑
160	chr1	184166594	184166724	131	4	0.172283	0.857003	-0.68472	↑
161	chr18	54663929	54664508	580	4	0.0754521	0.855683	-0.78023	↑
162	chr2	108378982	108379044	63	4	0.238913	0.90843	-0.669518	↑
163	chr1	48248386	48248531	146	5	0.507542	0.958103	-0.450561	↑
164	chr2	161608959	161609311	353	4	0.0456825	0.650077	-0.604394	↑
165	chr2	107177023	107177787	765	4	0.882859	0.194329	0.68853	↓
166	chr5	5948245	5948301	57	4	0.26986	0.89843	-0.62857	↑
167	chr3	38031484	38031548	65	4	0.0419986	0.745576	-0.703577	↑
168	chr13	64509961	64510220	260	4	0.0524927	0.754485	-0.701992	↑
169	chr13	112062174	112062328	155	4	0.0474541	0.759996	-0.712542	↑
170	chr18	29087039	29087139	101	4	0.073585	0.725015	-0.65143	↑
171	chr16	68793233	68793289	57	7	0.239198	0.665223	-0.426025	↑
172	chr15	116145673	116145757	85	4	0.0522131	0.708856	-0.656643	↑
173	chr17	50300161	50300221	61	6	0.454364	0.90438	-0.450016	↑
174	chr5	89131443	89131560	118	4	0.707709	0.0585033	0.649206	↓
175	chr11	48868475	48868600	126	4	0.065224	0.786549	-0.721325	↑
176	chr6	68480262	68480319	58	7	0.230565	0.676908	-0.446342	↑
177	chr9	96984405	96984481	77	4	0.0508404	0.725108	-0.674267	↑
178	chr5	110259082	110259334	253	5	0.0858971	0.743045	-0.657148	↑
179	chr5	27091712	27092036	325	4	0.792665	0.0972594	0.695406	↓
180	chr15	95335553	95335961	409	4	0.339538	0.943927	-0.604389	↑
181	chr1	99893839	99895156	1318	4	0.0643368	0.718122	-0.653785	↑
182	chr16	18516929	18516982	54	5	0.152896	0.747941	-0.595045	↑
183	chr8	90462609	90462671	63	7	0.560486	0.204132	0.356354	↓
184	chr9	108572918	108573180	263	4	0.129482	0.848931	-0.71945	↑
185	chr9	108351134	108351432	299	4	0.0856562	0.746808	-0.661151	↑
186	chr5	94317909	94318137	229	4	0.0522848	0.801965	-0.749681	↑
187	GL892553-2	109584	109636	53	6	0.318001	0.758909	-0.440908	↑
188	chr6	121366467	121366863	397	4	0.0618575	0.717176	-0.655319	↑
189	chr13	205087054	205089496	2443	4	0.0961252	0.788032	-0.691907	↑
190	chr10	5077243	5077339	97	4	0.18479	0.83952	-0.65473	↑
191	chr16	78131157	78131211	55	4	0.255237	0.889245	-0.634008	↑
192	chr1	212358950	212359023	74	4	0.0613992	0.763455	-0.702056	↑
193	chr9	125692716	125692913	198	4	0.0563352	0.767656	-0.711321	↑
194	chr1	279688554	279688971	418	5	0.0580646	0.539811	-0.481747	↑
195	chr13	39252769	39252926	158	4	0.194549	0.848857	-0.654308	↑
196	chr9	110023323	110024451	1129	5	0.0645969	0.576439	-0.511842	↑
197	chr7	120857796	120857871	76	5	0.684984	0.170813	0.514172	↓
198	chr2	53340404	53340592	189	4	0.0651453	0.661295	-0.596149	↑
199	chr1	100416728	100417765	1038	5	0.203802	0.709069	-0.505267	↑
200	chr7	74673080	74674397	1318	4	0.84477	0.200262	0.644508	↓
201	chr9	137724789	137724854	66	4	0.0479212	0.724765	-0.676844	↑
202	chr5	88639186	88639238	53	6	0.513061	0.885009	-0.371949	↑
203	chr2	36046737	36046808	72	4	0.0564535	0.613659	-0.557205	↑
204	chr15	136920643	136920705	63	7	0.442012	0.0919291	0.350083	↓
205	chr4	83950786	83950836	51	4	0.885754	0.159669	0.726085	↓
206	chr1	35913578	35913640	63	5	0.44845	0.908842	-0.460392	↑
207	chr17	61723176	61723376	201	4	0.215556	0.889761	-0.674205	↑
208	chr4	22857304	22857474	171	4	0.0451165	0.689929	-0.644813	↑
209	chr18	56596800	56596909	110	4	0.216015	0.933045	-0.71703	↑
210	chr13	204427709	204428096	388	4	0.69954	0.0892627	0.610277	↓
211	chr3	115826682	115828952	2271	4	0.0861382	0.849033	-0.762895	↑
212	chr9	128971556	128971755	200	4	0.195669	0.939241	-0.743572	↑
213	chr13	98074985	98075068	84	4	0.0617046	0.670352	-0.608648	↑
214	GL893245-2	39254	39332	79	5	0.328808	0.916102	-0.587294	↑
215	chr8	46709844	46709895	52	6	0.545095	0.139967	0.405128	↓
216	chr9	108011075	108011260	186	4	0.0685908	0.675513	-0.606922	↑
217	chr15	50821506	50821760	255	5	0.0646778	0.612114	-0.547436	↑
218	chr2	143862172	143862332	161	7	0.323254	0.761279	-0.438025	↑
219	chr14	75818352	75818736	385	4	0.0603895	0.695989	-0.635599	↑
220	chr17	25651279	25652489	1211	4	0.0530636	0.6466	-0.593536	↑
221	chr12	16365481	16365762	282	4	0.661115	0.0647945	0.596321	↓
222	chr9	108569309	108570149	841	5	0.0758484	0.648837	-0.572988	↑
223	chr1	23217011	23217368	358	4	0.642346	0.062722	0.579624	↓
224	chr2	11430360	11430410	51	5	0.765878	0.222753	0.543125	↓
225	chr16	86733785	86733885	101	4	0.179356	0.895155	-0.715798	↑
226	JH118583-1	58920	58987	68	4	0.40681	0.961619	-0.554808	↑
227	chr8	20674625	20674735	111	4	0.366786	0.921934	-0.555148	↑
228	chr15	50736155	50736331	177	4	0.774984	0.105024	0.66996	↓
229	chr5	88668104	88668222	119	6	0.717452	0.301806	0.415646	↓
230	chr9	143477737	143477827	91	4	0.0531111	0.691463	-0.638351	↑
231	chr15	40987354	40987441	88	5	0.186411	0.703488	-0.517076	↑
232	chr3	77295425	77295710	286	4	0.113187	0.843547	-0.73036	↑
233	chr8	118723574	118723753	180	4	0.154276	0.726843	-0.572567	↑
234	chr18	38491031	38491118	88	4	0.279678	0.862175	-0.582498	↑
235	chr17	6621939	6622066	128	4	0.323164	0.886155	-0.562991	↑
236	chr10	29059108	29059173	66	7	0.638238	0.199918	0.438321	↓
237	chr10	11075608	11075669	62	4	0.0637398	0.71458	-0.65084	↑
238	chr14	108078727	108078889	163	4	0.0720183	0.780904	-0.708886	↑
239	chr5	28173802	28174179	378	4	0.25039	0.855534	-0.605144	↑
240	chr12	36306896	36306976	81	6	0.948432	0.43411	0.514321	↓
241	chr15	5233025	5233127	103	4	0.0418265	0.589879	-0.548052	↑
242	chr5	99801875	99802678	804	4	0.0582239	0.663721	-0.605497	↑
243	chr5	96284167	96284239	73	4	0.0425098	0.639172	-0.596663	↑
244	chr18	5396784	5396873	90	5	0.437176	0.937919	-0.500743	↑
245	chrX	9413209	9413321	113	4	0.119303	0.874639	-0.755336	↑
246	chr6	4502804	4502877	74	4	0.840944	0.113621	0.727322	↓
247	chr15	119744467	119744788	322	4	0.0597175	0.587864	-0.528146	↑
248	chr3	113605281	113605404	124	5	0.741971	0.264858	0.477113	↓
249	chr3	117002776	117003455	680	5	0.276922	0.864926	-0.588005	↑
250	chr5	90945355	90945534	180	4	0.0482414	0.565503	-0.517262	↑
251	chr10	68013927	68014272	346	4	0.0550759	0.68328	-0.628204	↑
252	JH118531-1	99163	99230	68	4	0.235115	0.878421	-0.643307	↑
253	chr3	35344749	35344828	80	4	0.231665	0.854251	-0.622587	↑
254	chr17	57142730	57142786	57	4	0.080087	0.76176	-0.681674	↑
255	chr2	130943631	130943742	112	4	0.0580646	0.612038	-0.553973	↑
256	chr4	130532349	130532446	98	4	0.305459	0.854248	-0.548788	↑
257	chr8	29431784	29431836	53	6	0.425218	0.813314	-0.388097	↑
258	chr7	9386095	9386643	549	4	0.835842	0.144686	0.691156	↓
259	chr7	105971142	105971217	76	4	0.884793	0.214588	0.670205	↓
260	chr2	10250691	10250754	64	5	0.949267	0.446801	0.502466	↓
261	chr5	93279242	93279307	66	6	0.391788	0.874154	-0.482365	↑
262	chr9	126473079	126473130	52	4	0.11561	0.789916	-0.674305	↑
263	chr5	105655415	105655473	59	5	0.0904061	0.63774	-0.547334	↑
264	chr9	144343930	144344310	381	4	0.0537298	0.71916	-0.66543	↑
265	chr1	37861366	37861588	223	4	0.685999	0.0531738	0.632826	↓
266	chr4	18978885	18979071	187	4	0.680717	0.0487166	0.632001	↓
267	chr8	18883404	18883563	160	4	0.420947	0.930801	-0.509854	↑
268	chr8	22306902	22307082	181	4	0.326048	0.869159	-0.543111	↑
269	chr12	58143907	58143992	86	4	0.256475	0.91989	-0.663415	↑
270	chr2	159140054	159140147	94	7	0.403779	0.835484	-0.431705	↑
271	chr9	145636078	145636128	51	4	0.282841	0.931524	-0.648683	↑
272	chr5	15951725	15951795	71	4	0.317882	0.957913	-0.640031	↑
273	chr1	199358267	199358538	272	4	0.10814	0.794744	-0.686604	↑
274	chr13	2525768	2525832	65	5	0.628924	0.181038	0.447886	↓
275	chr3	6354158	6354217	60	4	0.0566573	0.621133	-0.564475	↑
276	chr3	130880364	130880422	59	5	0.417303	0.871852	-0.454549	↑
277	chr1	37771815	37771982	168	4	0.124109	0.713014	-0.588904	↑
278	chr15	14475669	14476081	413	4	0.0700126	0.702943	-0.632931	↑
279	chr16	35642596	35643350	755	5	0.182377	0.628548	-0.446171	↑
280	chr2	101439488	101439639	152	5	0.572105	0.144567	0.427538	↓
281	chr7	76987385	76987468	84	6	0.468786	0.638345	-0.169559	↑
282	GL893595-2	36244	36900	657	4	0.0407899	0.549357	-0.508567	↑
283	chr5	99369681	99369752	72	4	0.732601	0.145832	0.586768	↓
284	chr9	18476202	18476258	57	5	0.594346	0.191146	0.4032	↓
285	chr1	257951616	257951666	51	4	0.0595808	0.57013	-0.510549	↑
286	chr9	88803735	88803813	79	4	0.12125	0.648791	-0.527541	↑
287	JH118414-1	139695	139761	67	4	0.262953	0.766163	-0.50321	↑
288	chr17	7925673	7925754	82	5	0.445691	0.92427	-0.478579	↑
289	chr2	103528917	103528997	81	5	0.627556	0.221854	0.405703	↓
290	chr5	8530268	8530362	95	5	0.250863	0.749615	-0.498753	↑
291	chr7	29131159	29131211	53	5	0.215705	0.792069	-0.576364	↑
292	chr13	48566995	48567192	198	4	0.103277	0.767526	-0.664249	↑
293	chr14	146342669	146342779	111	4	0.250792	0.888519	-0.637727	↑
294	chr1	20047201	20047377	177	6	0.702211	0.445422	0.256789	↓
295	chr2	121709989	121710188	200	4	0.762344	0.0976246	0.66472	↓
296	chr9	107659554	107659609	56	4	0.0407948	0.602899	-0.562105	↑
297	chrX	8292421	8292672	252	6	0.273559	0.547603	-0.274044	↑
298	chr1	126587641	126587708	68	4	0.655129	0.119456	0.535673	↓
299	chr9	114875259	114875772	514	4	0.296346	0.966463	-0.670117	↑
300	chr10	77200398	77200553	156	4	0.644049	0.0797521	0.564296	↓
301	chr10	23507832	23508052	221	4	0.356985	0.885213	-0.528228	↑
302	chr9	143346708	143346785	78	5	0.414354	0.752667	-0.338313	↑
303	chr2	55952747	55952854	108	4	0.0424669	0.570774	-0.528307	↑
304	chr15	142860788	142861020	233	4	0.0746383	0.666164	-0.591525	↑
305	chr7	12956399	12956459	61	4	0.29033	0.869803	-0.579473	↑
306	chr4	22448696	22448796	101	4	0.292405	0.750059	-0.457654	↑
307	chr2	110902144	110902245	102	4	0.0428136	0.675217	-0.632403	↑
308	chr14	106340566	106340623	58	4	0.112834	0.649569	-0.536735	↑
309	chr3	77692096	77692156	61	7	0.577014	0.812701	-0.235687	↑
310	chr5	37658830	37658895	66	4	0.692797	0.158584	0.534213	↓
311	chr17	3474556	3474651	96	4	0.594695	0.0648983	0.529796	↓
312	chr2	46102785	46102995	211	4	0.0457676	0.579131	-0.533363	↑
313	chr7	65922759	65922920	162	4	0.243307	0.845284	-0.601977	↑
314	chr4	19758661	19758722	62	4	0.388405	0.944713	-0.556309	↑
315	chr6	22224235	22224285	51	4	0.724594	0.256903	0.467691	↓
316	chr10	17591182	17591252	71	4	0.935668	0.311057	0.624611	↓
317	chr1	7483146	7483207	62	5	0.371213	0.843549	-0.472336	↑
318	chr6	15845977	15846661	685	4	0.37575	0.886661	-0.510911	↑
319	chr3	110827011	110827673	663	4	0.0649307	0.640174	-0.575243	↑
320	chr13	200979018	200979075	58	4	0.0824713	0.651173	-0.568702	↑
321	chr7	98818870	98818928	59	5	0.582848	0.144779	0.438069	↓
322	chr1	267807756	267807837	82	5	0.468417	0.925837	-0.45742	↑
323	chr3	80458796	80458967	172	4	0.0889997	0.673435	-0.584436	↑
324	chr1	174603162	174603273	112	4	0.863756	0.392014	0.471742	↓
325	chr13	13814559	13815231	673	4	0.405093	0.957913	-0.55282	↑
326	chr9	61155475	61155536	62	5	0.963917	0.524064	0.439853	↓
327	chr9	82860670	82860734	65	5	0.467614	0.925431	-0.457816	↑
328	chr6	148224634	148224721	88	4	0.413358	0.944075	-0.530717	↑
329	chr5	7472405	7472456	52	5	0.394279	0.900313	-0.506034	↑
330	chr8	48639066	48639417	352	6	0.341182	0.65559	-0.314407	↑
331	chr13	141318371	141318421	51	4	0.783132	0.146297	0.636834	↓
332	GL896194-1	21453	21529	77	5	0.317612	0.832177	-0.514565	↑
333	chr1	32177333	32177703	371	4	0.734121	0.0835773	0.650544	↓
334	chr13	112028343	112028438	96	5	0.265829	0.758854	-0.493025	↑
335	chr7	24016855	24016973	119	4	0.212979	0.870892	-0.657912	↑
336	chr11	25859236	25859356	121	4	0.348257	0.905621	-0.557364	↑
337	chr1	97197706	97197850	145	4	0.286266	0.723035	-0.436769	↑
338	GL892277-2	10631	10703	73	4	0.878392	0.253784	0.624608	↓
339	chr7	55453115	55453201	87	5	0.424776	0.86245	-0.437674	↑
340	chr5	17768337	17768420	84	5	0.415908	0.841548	-0.42564	↑
341	chr1	7464917	7465112	196	4	0.771455	0.255023	0.516432	↓
342	chr15	104068142	104068195	54	5	0.439762	0.126876	0.312886	↓
343	GL892721-1	23586	23736	151	5	0.813861	0.405068	0.408793	↓
344	chr15	4703386	4704151	766	4	0.302103	0.846279	-0.544176	↑
345	chr10	49759193	49759275	83	4	0.851816	0.368706	0.48311	↓
346	chr1	262364722	262364808	87	4	0.401384	0.926466	-0.525082	↑
347	chr10	70374791	70374848	58	5	0.402042	0.854769	-0.452727	↑
348	chr6	105361528	105361588	61	5	0.608168	0.940655	-0.332487	↑
349	chr11	28717505	28717583	79	4	0.347597	0.866618	-0.519021	↑
350	GL893230-2	19573	19639	67	5	0.782251	0.368043	0.414208	↓
351	chr17	55930217	55930272	56	5	0.795727	0.397805	0.397922	↓
352	chr16	78539933	78540155	223	5	0.886481	0.453762	0.432719	↓
353	chr1	311005098	311005241	144	4	0.322402	0.794907	-0.472505	↑
354	chr2	84423187	84423258	72	4	0.815491	0.339877	0.475614	↓
355	chr2	70181216	70181296	81	4	0.559747	0.115087	0.44466	↓
356	chr7	8724175	8724635	461	4	0.720306	0.274059	0.446247	↓
357	chr9	147067625	147067696	72	5	0.501626	0.818066	-0.31644	↑
358	chr17	20707473	20707662	190	4	0.404364	0.900817	-0.496453	↑
359	chr7	55992232	55992462	231	4	0.280145	0.76	-0.479854	↑
360	chr2	40121440	40121500	61	5	0.785244	0.396592	0.388653	↓
361	chr6	88179953	88180017	65	4	0.626576	0.211323	0.415253	↓
362	chr1	38557172	38557223	52	4	0.941659	0.571819	0.36984	↓
363	chr12	4767690	4767740	51	5	0.244368	0.706482	-0.462113	↑
364	GL893714-1	8447	8508	62	4	0.749199	0.255582	0.493618	↓
365	chr12	21652155	21652421	267	5	0.721855	0.356028	0.365828	↓
366	chr15	7193917	7194562	646	4	0.419898	0.806969	-0.387072	↑
367	chr6	124067852	124068486	635	4	0.306909	0.70797	-0.401061	↑
368	chr9	17082380	17082479	100	6	0.6291	0.482774	0.146326	↓
369	chr1	309646369	309646448	80	4	0.782002	0.290792	0.49121	↓
370	chr3	133302623	133302744	122	5	0.712429	0.376436	0.335993	↓
371	chr1	23424793	23424926	134	4	0.547004	0.600738	-0.0537339	↑
372	chr12	17646207	17646331	125	7	0.479828	0.713211	-0.233383	↑
373	chr1	34925799	34925915	117	4	0.304749	0.703662	-0.398913	↑
374	chr1	285718359	285718703	345	5	0.380669	0.575901	-0.195231	↑
375	chr14	8606313	8606382	70	5	0.560762	0.901823	-0.341061	↑
376	chr3	95506230	95507381	1152	4	0.305196	0.653903	-0.348707	↑
377	chr2	51818081	51818373	293	5	0.750466	0.283265	0.467201	↓
378	chr13	204988008	204988228	221	4	0.217044	0.477947	-0.260904	↑
379	chr5	94714674	94714761	88	4	0.448392	0.629709	-0.181317	↑
380	chr3	124088676	124088813	138	4	0.227664	0.519191	-0.291527	↑
381	chr18	58844801	58844933	133	5	0.593137	0.665098	-0.0719613	↑
382	chr9	17360513	17361412	900	4	0.270325	0.625944	-0.355619	↑
383	chr13	147427158	147427222	65	5	0.696636	0.458665	0.237971	↓
384	chr1	13799608	13800812	1205	5	0.419508	0.651692	-0.232185	↑
385	chr17	59035853	59036060	208	4	0.699813	0.318403	0.38141	↓
386	chr11	67315970	67316279	310	4	0.369313	0.731485	-0.362172	↑
387	chr4	21797745	21797878	134	5	0.36296	0.52786	-0.1649	↑
388	chr1	36090884	36090943	60	4	0.467793	0.510944	-0.0431514	↑
389	chr9	139267032	139267164	133	4	0.721433	0.543062	0.178371	↓
390	chr12	40807881	40807988	108	4	0.482494	0.71713	-0.234636	↑
391	chr5	93670939	93671023	85	7	0.76419	0.646281	0.117909	↓
392	chr4	134122400	134122471	72	5	0.845555	0.683095	0.162461	↓
393	chr1	120305397	120306118	722	4	0.497337	0.521763	-0.0244254	↑
394	chr2	131612302	131612393	92	6	0.468177	0.634056	-0.165879	↑
395	GL892508-2	3319	3378	60	4	0.649206	0.493631	0.155576	↓
396	chr6	7634813	7634941	129	5	0.607307	0.493599	0.113708	↓
397	chr1	191710385	191710611	227	5	0.486529	0.400282	0.086247	↓
398	GL894351-1	16180	16257	78	4	0.513018	0.441462	0.0715565	↓
399	chr13	5837343	5837400	58	5	0.59911	0.647967	-0.0488578	↑
400	chr2	2182330	2182385	56	9	0.654809	0.702969	-0.0481602	↑
401	chr2	131610721	131610802	82	4	0.481727	0.482322	-0.000595263	↑
402	chr5	102305140	102305281	142	6	0.537733	0.589224	-0.0514911	↑
403	GL892553-2	88920	89007	88	4	0.486638	0.550986	-0.0643472	↑
404	chr15	34780763	34780813	51	4	0.548752	0.637781	-0.0890284	↑
405	chr1	18488960	18489504	545	5	0.581991	0.433761	0.14823	↓
406	chr16	83960199	83960260	62	5	0.488752	0.586102	-0.0973506	↑
407	chr3	81813930	81813990	61	9	0.690269	0.646254	0.0440151	↓
408	chr7	89227501	89227608	108	4	0.465018	0.491657	-0.0266393	↑
409	chr2	156401200	156401318	119	4	0.667447	0.536952	0.130496	↓
410	chr1	9613658	9614058	401	4	0.657368	0.532209	0.125159	↓
411	chr1	135920782	135920832	51	4	0.447649	0.493713	-0.0460646	↑
412	chr5	99418390	99418442	53	4	0.493051	0.519669	-0.0266173	↑
413	chr7	49385329	49385659	331	4	0.438266	0.420722	0.0175446	↓
414	chr1	224102554	224102777	224	4	0.555859	0.622633	-0.0667738	↑
415	chr9	61597203	61597270	68	4	0.484233	0.580645	-0.0964111	↑
416	chr8	75991001	75991123	123	4	0.473502	0.500507	-0.0270048	↑
417	chr9	124300464	124300566	103	4	0.506482	0.474629	0.0318531	↓
418	chr17	5326891	5326952	62	4	0.68478	0.69475	-0.00996933	↑
419	chrX	131306631	131306733	103	4	0.481281	0.431491	0.0497904	↓
420	chr1	120307403	120307544	142	4	0.471546	0.470773	0.000773032	↓
421	chr7	107005992	107006043	52	5	0.611381	0.60984	0.00154132	↓
422	chr5	102498043	102498220	178	4	0.53216	0.517813	0.0143468	↓

## Sheet: DMRs at promoter and genebody
DMRs located in the promoters and gene bodies
NO	Chromosome	Start	End	Mean methylation level of YP	Mean methylation level of OP	Different methylation	Gene_ID	Location	Hypermethylation ↑Hypomethylation ↓
1	chr6	147959204	147959377	0.139485	0.965679	-0.826194	ENSSSCG00000021036	Promoter	↑
2	chr1	34532561	34534091	0.0752895	0.877538	-0.802248	ENSSSCG00000019778	Promoter	↑
3	chr15	151280151	151280245	0.249105	0.685894	-0.436789	ENSSSCG00000016323	Promoter	↑
4	chr3	95506230	95507381	0.305196	0.653903	-0.348707	MSTRG.118960	Promoter	↑
5	chr13	147427158	147427222	0.696636	0.458665	0.237971	ENSSSCG00000011873	Promoter	↓
6	chr4	17269869	17269919	0.735664	0.323083	0.412581	ENSSSCG00000020166	Promoter	↓
7	chr2	101439488	101439639	0.572105	0.144567	0.427538	ENSSSCG00000023192	Promoter	↓
8	chr7	8724175	8724635	0.720306	0.274059	0.446247	ENSSSCG00000001047	Promoter	↓
9	chr2	10250691	10250754	0.949267	0.446801	0.502466	ENSSSCG00000013115	Promoter	↓
10	chr4	86682776	86682849	0.70706	0.0816822	0.625378	ENSSSCG00000026570	Promoter	↓
11	chr5	99207694	99207940	0.752751	0.0792196	0.673532	ENSSSCG00000000924	Promoter	↓
12	chr4	83950786	83950836	0.885754	0.159669	0.726085	MSTRG.128807	Promoter	↓
13	chr6	146654307	146654723	0.0484617	0.922937	-0.874475	ENSSSCG00000003849	Genebody	↑
14	chr18	36451449	36451586	0.0870362	0.94792	-0.860884	ENSSSCG00000025602	Genebody	↑
15	chr1	218716090	218717492	0.0453142	0.896626	-0.851312	ENSSSCG00000005127	Genebody	↑
16	chr2	110008731	110009346	0.0673768	0.885526	-0.81815	MSTRG.105841	Genebody	↑
17	chr16	50212780	50213290	0.082582	0.892838	-0.810256	MSTRG.83387	Genebody	↑
18	GL895308-2	295171	296548	0.117006	0.927025	-0.81002	ENSSSCG00000025243	Genebody	↑
19	chr11	24198381	24198452	0.112192	0.917442	-0.80525	ENSSSCG00000021818	Genebody	↑
20	chr2	122156110	122156237	0.14481	0.949233	-0.804424	MSTRG.106972	Genebody	↑
21	chr1	34532561	34534091	0.0752895	0.877538	-0.802248	ENSSSCG00000004181	Genebody	↑
22	chr15	88544956	88545046	0.123388	0.914079	-0.790691	ENSSSCG00000015960	Genebody	↑
23	chr1	34728456	34728540	0.141719	0.925805	-0.784086	ENSSSCG00000004190	Genebody	↑
24	chr6	149276141	149276793	0.139214	0.899952	-0.760737	ENSSSCG00000003877	Genebody	↑
25	chr13	132523966	132524328	0.205722	0.958241	-0.752519	MSTRG.51248	Genebody	↑
26	chr2	30765145	30765491	0.0675422	0.818086	-0.750544	ENSSSCG00000013315	Genebody	↑
27	chr12	6894499	6894569	0.113117	0.861928	-0.74881	ENSSSCG00000017238	Genebody	↑
28	chr3	77300967	77301258	0.0467554	0.79122	-0.744465	ENSSSCG00000008346	Genebody	↑
29	chr9	128971556	128971755	0.195669	0.939241	-0.743572	ENSSSCG00000015506	Genebody	↑
30	chr7	94803242	94803880	0.0617005	0.80186	-0.74016	ENSSSCG00000002270	Genebody	↑
31	chr3	76440173	76440497	0.0773332	0.81468	-0.737346	ENSSSCG00000027492	Genebody	↑
32	chr3	77295425	77295710	0.113187	0.843547	-0.73036	ENSSSCG00000008346	Genebody	↑
33	chr15	16731821	16732814	0.0770495	0.805558	-0.728508	MSTRG.70448	Genebody	↑
34	chr15	1923056	1923364	0.211714	0.937867	-0.726153	MSTRG.69672	Genebody	↑
35	chr18	56596800	56596909	0.216015	0.933045	-0.71703	MSTRG.96142	Genebody	↑
36	chr18	37682931	37682998	0.0706889	0.78538	-0.714691	MSTRG.95058	Genebody	↑
37	chr2	30761194	30761408	0.10373	0.815496	-0.711766	ENSSSCG00000013315	Genebody	↑
38	chr14	108078727	108078889	0.0720183	0.780904	-0.708886	ENSSSCG00000010433	Genebody	↑
39	chr17	57142730	57142786	0.080087	0.76176	-0.681674	MSTRG.90661	Genebody	↑
40	chr8	79314978	79315196	0.0692191	0.750782	-0.681562	ENSSSCG00000009000	Genebody	↑
41	chr9	137724789	137724854	0.0479212	0.724765	-0.676844	MSTRG.189585	Genebody	↑
42	chr18	59094557	59094615	0.0440961	0.719898	-0.675802	MSTRG.96326	Genebody	↑
43	chr17	61723176	61723376	0.215556	0.889761	-0.674205	ENSSSCG00000007485	Genebody	↑
44	chr2	110111543	110112360	0.0575282	0.729607	-0.672078	MSTRG.105841	Genebody	↑
45	chr9	114875259	114875772	0.296346	0.966463	-0.670117	ENSSSCG00000015427	Genebody	↑
46	chr9	144343930	144344310	0.0537298	0.71916	-0.66543	ENSSSCG00000015602	Genebody	↑
47	chr10	1543983	1544257	0.129362	0.794342	-0.66498	MSTRG.22503	Genebody	↑
48	chr7	18458130	18458302	0.06273	0.726849	-0.664119	MSTRG.158865	Genebody	↑
49	chr9	108351134	108351432	0.0856562	0.746808	-0.661151	ENSSSCG00000015402	Genebody	↑
50	chr5	110259082	110259334	0.0858971	0.743045	-0.657148	ENSSSCG00000000959	Genebody	↑
51	chr15	116145673	116145757	0.0522131	0.708856	-0.656643	ENSSSCG00000016101	Genebody	↑
52	chr15	116145673	116145757	0.0522131	0.708856	-0.656643	ENSSSCG00000026940	Genebody	↑
53	chr5	87438179	87438367	0.0892937	0.745712	-0.656418	MSTRG.140678	Genebody	↑
54	chr5	87866091	87866142	0.302245	0.95782	-0.655576	ENSSSCG00000000874	Genebody	↑
55	chr10	5077243	5077339	0.18479	0.83952	-0.65473	ENSSSCG00000010809	Genebody	↑
56	chr9	145636078	145636128	0.282841	0.931524	-0.648683	ENSSSCG00000015607	Genebody	↑
57	JH118531-1	99163	99230	0.235115	0.878421	-0.643307	ENSSSCG00000026383	Genebody	↑
58	chr5	15951725	15951795	0.317882	0.957913	-0.640031	ENSSSCG00000000199	Genebody	↑
59	chr9	143477737	143477827	0.0531111	0.691463	-0.638351	ENSSSCG00000015590	Genebody	↑
60	chr16	78131157	78131211	0.255237	0.889245	-0.634008	MSTRG.85753	Genebody	↑
61	chr5	5948245	5948301	0.26986	0.89843	-0.62857	ENSSSCG00000000082	Genebody	↑
62	chr5	99801875	99802678	0.0582239	0.663721	-0.605497	MSTRG.141719	Genebody	↑
63	chrX	5252443	5252528	0.267202	0.867794	-0.600593	ENSSSCG00000031025	Genebody	↑
64	chr16	24705654	24705786	0.277077	0.868053	-0.590976	ENSSSCG00000016848	Genebody	↑
65	chr3	6354158	6354217	0.0566573	0.621133	-0.564475	ENSSSCG00000007607	Genebody	↑
66	chr9	107659554	107659609	0.0407948	0.602899	-0.562105	ENSSSCG00000015401	Genebody	↑
67	chr11	25859236	25859356	0.348257	0.905621	-0.557364	ENSSSCG00000029837	Genebody	↑
68	chr4	19758661	19758722	0.388405	0.944713	-0.556309	ENSSSCG00000005997	Genebody	↑
69	chr8	20674625	20674735	0.366786	0.921934	-0.555148	ENSSSCG00000008761	Genebody	↑
70	chr4	130532349	130532446	0.305459	0.854248	-0.548788	MSTRG.132725	Genebody	↑
71	chr15	50821506	50821760	0.0646778	0.612114	-0.547436	ENSSSCG00000029688	Genebody	↑
72	chr14	106340566	106340623	0.112834	0.649569	-0.536735	ENSSSCG00000010429	Genebody	↑
73	chr4	129824743	129824809	0.406229	0.940266	-0.534037	ENSSSCG00000006872	Genebody	↑
74	chr5	87941976	87942071	0.407048	0.940458	-0.533411	MSTRG.140700	Genebody	↑
75	chr2	46102785	46102995	0.0457676	0.579131	-0.533363	ENSSSCG00000013384	Genebody	↑
76	chr6	148224634	148224721	0.413358	0.944075	-0.530717	ENSSSCG00000021292	Genebody	↑
77	chr14	99909651	99909959	0.258142	0.786714	-0.528573	MSTRG.65702	Genebody	↑
78	GL896194-1	21453	21529	0.317612	0.832177	-0.514565	ENSSSCG00000023320	Genebody	↑
79	chr8	18883404	18883563	0.420947	0.930801	-0.509854	ENSSSCG00000008756	Genebody	↑
80	chr5	7472405	7472456	0.394279	0.900313	-0.506034	ENSSSCG00000000119	Genebody	↑
81	chr17	20707473	20707662	0.404364	0.900817	-0.496453	ENSSSCG00000007058	Genebody	↑
82	chr1	7483146	7483207	0.371213	0.843549	-0.472336	ENSSSCG00000004032	Genebody	↑
83	chr3	75759006	75759056	0.469303	0.939775	-0.470472	ENSSSCG00000008332	Genebody	↑
84	chr9	82860670	82860734	0.467614	0.925431	-0.457816	ENSSSCG00000015335	Genebody	↑
85	chr4	22448696	22448796	0.292405	0.750059	-0.457654	ENSSSCG00000012391	Genebody	↑
86	chr3	130880364	130880422	0.417303	0.871852	-0.454549	ENSSSCG00000008621	Genebody	↑
87	chr1	48248386	48248531	0.507542	0.958103	-0.450561	ENSSSCG00000004245	Genebody	↑
88	chr17	50300161	50300221	0.454364	0.90438	-0.450016	ENSSSCG00000027279	Genebody	↑
89	GL892553-2	109584	109636	0.318001	0.758909	-0.440908	ENSSSCG00000022860	Genebody	↑
90	chr2	143862172	143862332	0.323254	0.761279	-0.438025	ENSSSCG00000014316	Genebody	↑
91	chr5	17768337	17768420	0.415908	0.841548	-0.42564	MSTRG.135553	Genebody	↑
92	chr3	122222200	122222273	0.425645	0.820723	-0.395078	MSTRG.121016	Genebody	↑
93	chr3	122222200	122222273	0.425645	0.820723	-0.395078	ENSSSCG00000008593	Genebody	↑
94	chr8	29431784	29431836	0.425218	0.813314	-0.388097	ENSSSCG00000028471	Genebody	↑
95	chr15	7193917	7194562	0.419898	0.806969	-0.387072	MSTRG.70026	Genebody	↑
96	chr5	88639186	88639238	0.513061	0.885009	-0.371949	ENSSSCG00000000880	Genebody	↑
97	chr11	67315970	67316279	0.369313	0.731485	-0.362172	MSTRG.32805,MSTRG.32805	Genebody	↑
98	chr3	95506230	95507381	0.305196	0.653903	-0.348707	ENSSSCG00000008418	Genebody	↑
99	chr14	8606313	8606382	0.560762	0.901823	-0.341061	ENSSSCG00000009641	Genebody	↑
100	chr9	143346708	143346785	0.414354	0.752667	-0.338313	ENSSSCG00000015587	Genebody	↑
101	chr3	124088676	124088813	0.227664	0.519191	-0.291527	MSTRG.121119	Genebody	↑
102	chr3	124088676	124088813	0.227664	0.519191	-0.291527	MSTRG.121124	Genebody	↑
103	chr12	40807881	40807988	0.482494	0.71713	-0.234636	ENSSSCG00000022417	Genebody	↑
104	chr12	17646207	17646331	0.479828	0.713211	-0.233383	ENSSSCG00000017316	Genebody	↑
105	chr1	285718359	285718703	0.380669	0.575901	-0.195231	ENSSSCG00000005485	Genebody	↑
106	chr7	76987385	76987468	0.468786	0.638345	-0.169559	MSTRG.163665	Genebody	↑
107	chr2	131612302	131612393	0.468177	0.634056	-0.165879	ENSSSCG00000025977	Genebody	↑
108	chr15	34780763	34780813	0.548752	0.637781	-0.0890284	ENSSSCG00000027791	Genebody	↑
109	chr1	224102554	224102777	0.555859	0.622633	-0.0667738	ENSSSCG00000005135	Genebody	↑
110	GL892553-2	88920	89007	0.486638	0.550986	-0.0643472	ENSSSCG00000022860	Genebody	↑
111	chr8	75991001	75991123	0.473502	0.500507	-0.0270048	ENSSSCG00000008976	Genebody	↑
112	chr5	99418390	99418442	0.493051	0.519669	-0.0266173	MSTRG.141682	Genebody	↑
113	chr2	131610721	131610802	0.481727	0.482322	-0.000595263	ENSSSCG00000025977	Genebody	↑
114	chr9	124300464	124300566	0.506482	0.474629	0.0318531	ENSSSCG00000015462	Genebody	↓
115	GL894351-1	16180	16257	0.513018	0.441462	0.0715565	ENSSSCG00000028866	Genebody	↓
116	chr2	156401200	156401318	0.667447	0.536952	0.130496	ENSSSCG00000014427	Genebody	↓
117	chr2	156401200	156401318	0.667447	0.536952	0.130496	MSTRG.109956	Genebody	↓
118	chr1	18488960	18489504	0.581991	0.433761	0.14823	ENSSSCG00000004101	Genebody	↓
119	GL892508-2	3319	3378	0.649206	0.493631	0.155576	MSTRG.191689	Genebody	↓
120	chr4	134122400	134122471	0.845555	0.683095	0.162461	ENSSSCG00000006885	Genebody	↓
121	chr15	104068142	104068195	0.439762	0.126876	0.312886	ENSSSCG00000016034	Genebody	↓
122	chr1	38557172	38557223	0.941659	0.571819	0.36984	ENSSSCG00000004209	Genebody	↓
123	chr17	55930217	55930272	0.795727	0.397805	0.397922	ENSSSCG00000007457	Genebody	↓
124	chr8	46709844	46709895	0.545095	0.139967	0.405128	ENSSSCG00000008868	Genebody	↓
125	chr2	103528917	103528997	0.627556	0.221854	0.405703	MSTRG.105346	Genebody	↓
126	chr6	88179953	88180017	0.626576	0.211323	0.415253	ENSSSCG00000003654	Genebody	↓
127	chr5	88668104	88668222	0.717452	0.301806	0.415646	ENSSSCG00000000880	Genebody	↓
128	chr16	78539933	78540155	0.886481	0.453762	0.432719	MSTRG.85796	Genebody	↓
129	chr10	29059108	29059173	0.638238	0.199918	0.438321	MSTRG.24435	Genebody	↓
130	chr2	70181216	70181296	0.559747	0.115087	0.44466	MSTRG.102074	Genebody	↓
131	chr7	8724175	8724635	0.720306	0.274059	0.446247	MSTRG.158223	Genebody	↓
132	chr1	309646369	309646448	0.782002	0.290792	0.49121	ENSSSCG00000005771	Genebody	↓
133	chr2	10250691	10250754	0.949267	0.446801	0.502466	ENSSSCG00000013111	Genebody	↓
134	chr7	120857796	120857871	0.684984	0.170813	0.514172	ENSSSCG00000002455	Genebody	↓
135	chr12	36306896	36306976	0.948432	0.43411	0.514321	ENSSSCG00000017635	Genebody	↓
136	chr1	7464917	7465112	0.771455	0.255023	0.516432	ENSSSCG00000004032	Genebody	↓
137	chr1	16134881	16134982	0.677705	0.152852	0.524853	ENSSSCG00000004081	Genebody	↓
138	chr17	3474556	3474651	0.594695	0.0648983	0.529796	ENSSSCG00000021988	Genebody	↓
139	chr2	11430360	11430410	0.765878	0.222753	0.543125	ENSSSCG00000013127	Genebody	↓
140	chr1	23217011	23217368	0.642346	0.062722	0.579624	MSTRG.1926	Genebody	↓
141	chr10	1123465	1123584	0.76037	0.177205	0.583165	MSTRG.22503	Genebody	↓
142	chr5	99369681	99369752	0.732601	0.145832	0.586768	MSTRG.141682	Genebody	↓
143	chr10	17591182	17591252	0.935668	0.311057	0.624611	MSTRG.23576	Genebody	↓
144	chr9	25840851	25840938	0.71038	0.0768457	0.633535	ENSSSCG00000024966	Genebody	↓
145	chr7	74673080	74674397	0.84477	0.200262	0.644508	ENSSSCG00000001975	Genebody	↓
146	chr1	32177333	32177703	0.734121	0.0835773	0.650544	ENSSSCG00000004166	Genebody	↓
147	chr2	121709989	121710188	0.762344	0.0976246	0.66472	MSTRG.106925	Genebody	↓
148	chr2	121709989	121710188	0.762344	0.0976246	0.66472	MSTRG.106926	Genebody	↓
149	chr15	50736155	50736331	0.774984	0.105024	0.66996	ENSSSCG00000029688	Genebody	↓
150	chr7	105971142	105971217	0.884793	0.214588	0.670205	ENSSSCG00000002389	Genebody	↓
151	chr1	23854555	23854874	0.901227	0.211489	0.689737	ENSSSCG00000004132	Genebody	↓
152	chr1	36619644	36619809	0.791547	0.0903959	0.701151	ENSSSCG00000004202	Genebody	↓
153	chr18	25055640	25055830	0.787036	0.0691761	0.71786	MSTRG.94001	Genebody	↓
154	chr9	140561005	140561186	0.805677	0.067992	0.737685	ENSSSCG00000023351	Genebody	↓
155	chr9	44695904	44696347	0.858071	0.101287	0.756785	ENSSSCG00000015037	Genebody	↓
156	GL894982-1	33990	34070	0.911784	0.117717	0.794067	ENSSSCG00000027567	Genebody	↓
157	chr10	62816790	62817164	0.910203	0.107307	0.802896	ENSSSCG00000011103	Genebody	↓
158	chr1	142962511	142962581	0.885387	0.0545832	0.830804	ENSSSCG00000004710	Genebody	↓

## Sheet: GO enrichment of DMRs
GO enrichment of DMR located genes
up-regulated									down-regulated
Category	p-value	q-value	Different Methylated	Background	Term	Ontology	Different Methylated Gene ID	Gene Symbol	Category	p-value	q-value	Different Methylated	Background	Term	Ontology	Different Methylated Gene ID	Gene Symbol
GO:0005515	6.17639e-05	0.0280408	48	8838	protein binding	MF	ENSSSCG00000025243,ENSSSCG00000016848,ENSSSCG00000008761,ENSSSCG00000028471,ENSSSCG00000010429,ENSSSCG00000010433,ENSSSCG00000022860,ENSSSCG00000026383,ENSSSCG00000025602,ENSSSCG00000015335,ENSSSCG00000014316,ENSSSCG00000015427,ENSSSCG00000016323,ENSSSCG00000021818,ENSSSCG00000006872,ENSSSCG00000008418,ENSSSCG00000015401,ENSSSCG00000003849,ENSSSCG00000008756,ENSSSCG00000008593,ENSSSCG00000000119,…	SGIP1,EGFLAM,TBC1D19,DTHD1,PRKG1,SGMS1,SASH1,NRP2,--,DYNC1I1,TGFBI,ORC5,COPS8,ENOX1,--,--,PCLO,MAGOH,DHX15,KLHL29,EIF3L,CACNA2D1,CFLAR,FAM184A,AMBP,CASP10,FAF1,TNN,APLF,PLCB4,GAS2L3,COL14A1,KPNA7,--,EIF3M,--,FLVCR1,--,--,CACNA1I,RAB3B,TTYH2,--,HNF1B,STX7,MED30,C2orf42,--	GO:0048706	0.00096673	0.0316219	2	28	embryonic skeletal system development	BP	ENSSSCG00000007457,ENSSSCG00000017635	SULF2,MKS1
GO:0097342	0.000270118	0.0458646	2	6	ripoptosome	CC	ENSSSCG00000016101,ENSSSCG00000026940	CFLAR,CASP10	GO:0006772	0.00459854	0.0316219	1	3	thiamine metabolic process	BP	ENSSSCG00000015462	TPK1
GO:0035877	0.000311129	0.0458646	2	6	death effector domain binding	MF	ENSSSCG00000016101,ENSSSCG00000026940	CFLAR,CASP10	GO:0050777	0.0087892	0.0447653	1	5	negative regulation of immune response	BP	ENSSSCG00000016034	COL3A1
GO:0097199	0.000404094	0.0458646	2	8	cysteine-type endopeptidase activity involved in apoptotic signaling pathway	MF	ENSSSCG00000016101,ENSSSCG00000026940	CFLAR,CASP10	GO:0032740	0.0133328	0.0483714	1	9	positive regulation of interleukin-17 production	BP	ENSSSCG00000015037	IL18
GO:0016282	0.000532826	0.0483806	2	10	eukaryotic 43S preinitiation complex	CC	ENSSSCG00000000119,ENSSSCG00000013315	EIF3L,EIF3M	GO:1990403	0.0134598	0.0483714	1	8	embryonic brain development	BP	ENSSSCG00000017635	MKS1
GO:0033290	0.000705901	0.0509042	2	11	eukaryotic 48S preinitiation complex	CC	ENSSSCG00000000119,ENSSSCG00000013315	EIF3L,EIF3M	GO:0097190	0.0657132	0.113958	1	41	apoptotic signaling pathway	BP	ENSSSCG00000013115	CD5
GO:0005852	0.000784867	0.0509042	2	13	eukaryotic translation initiation factor 3 complex	CC	ENSSSCG00000000119,ENSSSCG00000013315	EIF3L,EIF3M	GO:0042733	0.0789149	0.130257	1	44	embryonic digit morphogenesis	BP	ENSSSCG00000017635	MKS1
GO:0001731	0.00139634	0.063048	2	16	formation of translation preinitiation complex	BP	ENSSSCG00000000119,ENSSSCG00000013315	EIF3L,EIF3M	GO:0009611	0.000522488	0.0316219	2	21	response to wounding	BP	ENSSSCG00000002389,ENSSSCG00000007457	VASH1,SULF2
GO:0005246	0.00180784	0.063048	2	17	calcium channel regulator activity	MF	ENSSSCG00000010429,ENSSSCG00000015402	PRKG1,CACNA2D1	GO:0031663	0.000593461	0.0316219	2	23	lipopolysaccharide-mediated signaling pathway	BP	ENSSSCG00000013111,ENSSSCG00000015037	CD6,IL18
GO:0031982	0.0026511	0.063048	3	71	vesicle	CC	ENSSSCG00000015335,ENSSSCG00000021036,ENSSSCG00000004190	DYNC1I1,RAB3B,STX7	GO:0042095	0.00135461	0.0316219	1	1	interferon-gamma biosynthetic process	BP	ENSSSCG00000015037	IL18
GO:0030073	0.00265559	0.063048	2	20	insulin secretion	BP	ENSSSCG00000015401,ENSSSCG00000022417	PCLO,HNF1B	GO:2000345	0.0015589	0.0316219	1	1	regulation of hepatocyte proliferation	BP	ENSSSCG00000007457	SULF2
GO:0006446	0.00273288	0.063048	2	21	regulation of translational initiation	BP	ENSSSCG00000000119,ENSSSCG00000013315	EIF3L,EIF3M	GO:1901620	0.0016139	0.0316219	1	1	regulation of smoothened signaling pathway involved in dorsal/ventral neural tube patterning	BP	ENSSSCG00000017635	MKS1
GO:0016049	0.00354142	0.063048	2	25	cell growth	BP	ENSSSCG00000010433,ENSSSCG00000015506	SGMS1,TNN	GO:0004577	0.00163422	0.0316219	1	1	N-acetylglucosaminyldiphosphodolichol N-acetylglucosaminyltransferase activity	MF	ENSSSCG00000006885	ALG14
GO:0048250	0.00402451	0.063048	1	1	mitochondrial iron ion transport	BP	ENSSSCG00000009641	SLC25A37	GO:0004788	0.0017088	0.0316219	1	1	thiamine diphosphokinase activity	MF	ENSSSCG00000015462	TPK1
GO:0033188	0.0043391	0.063048	1	1	sphingomyelin synthase activity	MF	ENSSSCG00000010433	SGMS1	GO:0009229	0.0017088	0.0316219	1	1	thiamine diphosphate biosynthetic process	BP	ENSSSCG00000015462	TPK1
GO:0005891	0.0044257	0.063048	2	29	voltage-gated calcium channel complex	CC	ENSSSCG00000015402,ENSSSCG00000000082	CACNA2D1,CACNA1I	GO:0030975	0.0017088	0.0316219	1	1	thiamine binding	MF	ENSSSCG00000015462	TPK1
GO:0043657	0.00454543	0.063048	1	1	host cell	CC	ENSSSCG00000015335	DYNC1I1	GO:0046456	0.00185404	0.0316219	1	1	icosanoid biosynthetic process	BP	ENSSSCG00000023351	PLA2G4A
GO:0045503	0.00454543	0.063048	1	1	dynein light chain binding	MF	ENSSSCG00000015335	DYNC1I1	GO:0009414	0.0019627	0.0316219	1	1	response to water deprivation	BP	ENSSSCG00000004101	LRP11
GO:0017157	0.00456952	0.063048	2	28	regulation of exocytosis	BP	ENSSSCG00000015401,ENSSSCG00000021036	PCLO,RAB3B	GO:0005586	0.00204423	0.0316219	1	1	collagen type III trimer	CC	ENSSSCG00000016034	COL3A1
GO:0000077	0.0046258	0.063048	2	26	DNA damage checkpoint	BP	ENSSSCG00000015602,ENSSSCG00000015960	--,--	GO:0030862	0.00216997	0.0316219	1	1	positive regulation of polarized epithelial cell differentiation	BP	ENSSSCG00000004166	AHI1
GO:0051640	0.00474881	0.063048	1	1	organelle localization	BP	ENSSSCG00000004190	STX7	GO:0035844	0.00216997	0.0316219	1	1	cloaca development	BP	ENSSSCG00000004166	AHI1
GO:0070925	0.00474881	0.063048	1	1	organelle assembly	BP	ENSSSCG00000004190	STX7	GO:0039008	0.00216997	0.0316219	1	1	pronephric nephron tubule morphogenesis	BP	ENSSSCG00000004166	AHI1
GO:1902685	0.00474881	0.063048	1	1	positive regulation of receptor localization to synapse	BP	ENSSSCG00000004190	STX7	GO:0039023	0.00216997	0.0316219	1	1	pronephric duct morphogenesis	BP	ENSSSCG00000004166	AHI1
GO:0035565	0.0048194	0.063048	1	1	regulation of pronephros size	BP	ENSSSCG00000022417	HNF1B	GO:0070121	0.00216997	0.0316219	1	1	Kupffer's vesicle development	BP	ENSSSCG00000004166	AHI1
GO:0039020	0.0048194	0.063048	1	1	pronephric nephron tubule development	BP	ENSSSCG00000022417	HNF1B	GO:0007179	0.00240274	0.0316219	2	41	transforming growth factor beta receptor signaling pathway	BP	ENSSSCG00000004209,ENSSSCG00000016034	PTPRK,COL3A1
GO:0060677	0.0048194	0.063048	1	1	ureteric bud elongation	BP	ENSSSCG00000022417	HNF1B	GO:0005044	0.00264086	0.0316219	2	43	scavenger receptor activity	MF	ENSSSCG00000013111,ENSSSCG00000013115	CD6,CD5
GO:0061296	0.0048194	0.063048	1	1	negative regulation of mesenchymal cell apoptotic process involved in mesonephric nephron morphogenesis	BP	ENSSSCG00000022417	HNF1B	GO:2000095	0.00273057	0.0316219	1	2	regulation of Wnt signaling pathway, planar cell polarity pathway	BP	ENSSSCG00000017635	MKS1
GO:0072176	0.0048194	0.063048	1	1	nephric duct development	BP	ENSSSCG00000022417	HNF1B	GO:0060271	0.00325723	0.0316219	2	42	cilium morphogenesis	BP	ENSSSCG00000017635,ENSSSCG00000004166	MKS1,AHI1
GO:0017061	0.00486409	0.063048	1	1	S-methyl-5-thioadenosine phosphorylase activity	MF	ENSSSCG00000005135	--	GO:0014846	0.00343616	0.0316219	1	2	esophagus smooth muscle contraction	BP	ENSSSCG00000007457	SULF2
GO:1900044	0.00494806	0.063048	1	1	regulation of protein K63-linked ubiquitination	BP	ENSSSCG00000022860	SASH1	GO:0030201	0.00343616	0.0316219	1	2	heparan sulfate proteoglycan metabolic process	BP	ENSSSCG00000007457	SULF2
GO:1902498	0.00494806	0.063048	1	1	regulation of protein autoubiquitination	BP	ENSSSCG00000022860	SASH1	GO:0035860	0.00343616	0.0316219	1	2	glial cell-derived neurotrophic factor receptor signaling pathway	BP	ENSSSCG00000007457	SULF2
GO:0002183	0.0049593	0.063048	1	1	cytoplasmic translational initiation	BP	ENSSSCG00000013315	EIF3M	GO:0035902	0.00349794	0.0316219	1	2	response to immobilization stress	BP	ENSSSCG00000004101	LRP11
GO:0097037	0.00497157	0.063048	1	1	heme export	BP	ENSSSCG00000015590	FLVCR1	GO:0043541	0.00360874	0.0316219	1	2	UDP-N-acetylglucosamine transferase complex	CC	ENSSSCG00000006885	ALG14
GO:0004133	0.0049994	0.063048	1	1	glycogen debranching enzyme activity	MF	ENSSSCG00000006872	--	GO:0065001	0.0036671	0.0316219	1	2	specification of axis polarity	BP	ENSSSCG00000004166	AHI1
GO:0004134	0.0049994	0.063048	1	1	4-alpha-glucanotransferase activity	MF	ENSSSCG00000006872	--	GO:0006154	0.00394688	0.0316219	1	3	adenosine catabolic process	BP	ENSSSCG00000004710	ADAL
GO:0004135	0.0049994	0.063048	1	1	amylo-alpha-1,6-glucosidase activity	MF	ENSSSCG00000006872	--	GO:0046103	0.00394688	0.0316219	1	3	inosine biosynthetic process	BP	ENSSSCG00000004710	ADAL
GO:0045191	0.00544624	0.0668268	1	1	regulation of isotype switching	BP	ENSSSCG00000008346	APLF	GO:0060414	0.00395122	0.0316219	1	2	aorta smooth muscle tissue morphogenesis	BP	ENSSSCG00000016034	COL3A1
GO:0072181	0.00634074	0.0733123	1	2	mesonephric duct formation	BP	ENSSSCG00000022417	HNF1B	GO:0030101	0.00416422	0.0316219	1	3	natural killer cell activation	BP	ENSSSCG00000015037	IL18
GO:0043101	0.00654249	0.0733123	1	2	purine-containing compound salvage	BP	ENSSSCG00000005135	--	GO:1901491	0.00424351	0.0316219	1	2	negative regulation of lymphangiogenesis	BP	ENSSSCG00000002389	VASH1
GO:1900212	0.00685292	0.0733123	1	2	negative regulation of mesenchymal cell apoptotic process involved in metanephros development	BP	ENSSSCG00000022417	HNF1B	GO:0097421	0.00431903	0.0316219	1	3	liver regeneration	BP	ENSSSCG00000007457	SULF2
GO:0019862	0.00692602	0.0733123	1	3	IgA binding	MF	ENSSSCG00000005485	AMBP	GO:0002438	0.00444307	0.0316219	1	3	acute inflammatory response to antigenic stimulus	BP	ENSSSCG00000013111	CD6
GO:0030431	0.0071284	0.0733123	1	2	sleep	BP	ENSSSCG00000000082	CACNA1I	GO:0047498	0.00452221	0.0316219	1	3	calcium-dependent phospholipase A2 activity	MF	ENSSSCG00000023351	PLA2G4A
GO:0001714	0.00729943	0.0733123	1	2	endodermal cell fate specification	BP	ENSSSCG00000022417	HNF1B	GO:0036064	0.00456026	0.0316219	2	55	ciliary basal body	CC	ENSSSCG00000017635,ENSSSCG00000004166	MKS1,AHI1
GO:2001237	0.00780365	0.0733123	2	33	negative regulation of extrinsic apoptotic signaling pathway	BP	ENSSSCG00000010433,ENSSSCG00000016101	SGMS1,CFLAR	GO:0051142	0.00457425	0.0316219	1	3	positive regulation of NK T cell proliferation	BP	ENSSSCG00000015037	IL18
GO:0002544	0.00825457	0.0733123	1	2	chronic inflammatory response	BP	ENSSSCG00000004181	VNN1	GO:0070891	0.00461633	0.0316219	1	3	lipoteichoic acid binding	MF	ENSSSCG00000013111	CD6
GO:0045986	0.00833856	0.0733123	1	3	negative regulation of smooth muscle contraction	BP	ENSSSCG00000010429	PRKG1	GO:0071236	0.00481466	0.0318682	1	3	cellular response to antibiotic	BP	ENSSSCG00000023351	PLA2G4A
GO:0097190	0.00848273	0.0733123	2	41	apoptotic signaling pathway	BP	ENSSSCG00000016101,ENSSSCG00000026940	CFLAR,CASP10	GO:0006898	0.00488491	0.0318682	2	63	receptor-mediated endocytosis	BP	ENSSSCG00000013111,ENSSSCG00000013115	CD6,CD5
GO:0061017	0.00868542	0.0733123	1	2	hepatoblast differentiation	BP	ENSSSCG00000022417	HNF1B	GO:0004065	0.00511358	0.0325842	1	3	arylsulfatase activity	MF	ENSSSCG00000007457	SULF2
GO:0042663	0.00883939	0.0733123	1	3	regulation of endodermal cell fate specification	BP	ENSSSCG00000022417	HNF1B	GO:0001738	0.00567471	0.035338	1	3	morphogenesis of a polarized epithelium	BP	ENSSSCG00000004166	AHI1
GO:0019060	0.00913638	0.0733123	1	3	intracellular transport of viral protein in host cell	BP	ENSSSCG00000015335	DYNC1I1	GO:0032819	0.00595931	0.0362856	1	4	positive regulation of natural killer cell proliferation	BP	ENSSSCG00000015037	IL18
GO:0003743	0.00934107	0.0733123	2	43	translation initiation factor activity	MF	ENSSSCG00000000119,ENSSSCG00000013315	EIF3L,EIF3M	GO:0008449	0.00619425	0.0366247	1	4	N-acetylglucosamine-6-sulfatase activity	MF	ENSSSCG00000007457	SULF2
GO:0051586	0.00970262	0.0733123	1	2	positive regulation of dopamine uptake involved in synaptic transmission	BP	ENSSSCG00000021036	RAB3B	GO:0061009	0.00628234	0.0366247	1	4	common bile duct development	BP	ENSSSCG00000017635	MKS1
GO:0007253	0.00972604	0.0733123	1	3	cytoplasmic sequestering of NF-kappaB	BP	ENSSSCG00000003877	FAF1	GO:0035413	0.00796555	0.044089	1	5	positive regulation of catenin import into nucleus	BP	ENSSSCG00000007457	SULF2
GO:0072179	0.0097458	0.0733123	1	2	nephric duct formation	BP	ENSSSCG00000022417	HNF1B	GO:0031985	0.00801835	0.044089	1	5	Golgi cisterna	CC	ENSSSCG00000002455	GOLGA5
GO:0016763	0.00975754	0.0733123	1	4	transferase activity, transferring pentosyl groups	MF	ENSSSCG00000005135	--	GO:1903887	0.00804544	0.044089	1	4	motile primary cilium assembly	BP	ENSSSCG00000017635	MKS1
GO:0021649	0.0097814	0.0733123	1	2	vestibulocochlear nerve structural organization	BP	ENSSSCG00000026383	NRP2	GO:0001771	0.00838947	0.0447653	1	4	immunological synapse formation	BP	ENSSSCG00000013111	CD6
GO:0021828	0.0097814	0.0733123	1	2	gonadotrophin-releasing hormone neuronal migration to the hypothalamus	BP	ENSSSCG00000026383	NRP2	GO:0005814	0.00855949	0.0447653	2	63	centriole	CC	ENSSSCG00000017635,ENSSSCG00000004166	MKS1,AHI1
GO:1903375	0.0097814	0.0733123	1	2	facioacoustic ganglion development	BP	ENSSSCG00000026383	NRP2	GO:0000301	0.00882235	0.0447653	1	6	retrograde transport, vesicle recycling within Golgi	BP	ENSSSCG00000002455	GOLGA5
GO:0018125	0.00994742	0.0733123	1	2	peptidyl-cysteine methylation	BP	ENSSSCG00000021036	RAB3B	GO:0010669	0.00917072	0.0456869	1	5	epithelial structure maintenance	BP	ENSSSCG00000017635	MKS1
GO:1990454	0.00995948	0.0733123	1	2	L-type voltage-gated calcium channel complex	CC	ENSSSCG00000015402	CACNA2D1	GO:0040023	0.00954172	0.0466863	1	4	establishment of nucleus localization	BP	ENSSSCG00000004081	--
GO:0004692	0.0100318	0.0733123	1	2	cGMP-dependent protein kinase activity	MF	ENSSSCG00000010429	PRKG1	GO:0032836	0.00973522	0.0467974	1	5	glomerular basement membrane development	BP	ENSSSCG00000007457	SULF2
GO:0006413	0.0102835	0.0733123	2	44	translational initiation	BP	ENSSSCG00000000119,ENSSSCG00000013315	EIF3L,EIF3M	GO:1900017	0.00999344	0.0471479	1	7	positive regulation of cytokine production involved in inflammatory response	BP	ENSSSCG00000013111	CD6
GO:0014069	0.0103683	0.0733123	2	38	postsynaptic density	CC	ENSSSCG00000015401,ENSSSCG00000007058	PCLO,PLCB4	GO:0042088	0.0101523	0.0471479	1	7	T-helper 1 type immune response	BP	ENSSSCG00000015037	IL18
GO:0097494	0.0111487	0.0733123	1	2	regulation of vesicle size	BP	ENSSSCG00000021036	RAB3B	GO:0032725	0.0105652	0.0482478	1	6	positive regulation of granulocyte macrophage colony-stimulating factor production	BP	ENSSSCG00000015037	IL18
GO:0001650	0.0113414	0.0733123	1	3	fibrillar center	CC	ENSSSCG00000000119	EIF3L	GO:0050482	0.0112178	0.0483714	1	7	arachidonic acid secretion	BP	ENSSSCG00000023351	PLA2G4A
GO:0097374	0.0117622	0.0733123	1	3	sensory neuron axon guidance	BP	ENSSSCG00000026383	NRP2	GO:0071599	0.011285	0.0483714	1	6	otic vesicle development	BP	ENSSSCG00000004166	AHI1
GO:0019934	0.0118914	0.0733123	1	3	cGMP-mediated signaling	BP	ENSSSCG00000010429	PRKG1	GO:0003094	0.0114129	0.0483714	1	7	glomerular filtration	BP	ENSSSCG00000007457	SULF2
GO:0015939	0.0123316	0.0733123	1	3	pantothenate metabolic process	BP	ENSSSCG00000004181	VNN1	GO:0033555	0.0117344	0.0483714	1	6	multicellular organismal response to stress	BP	ENSSSCG00000004101	LRP11
GO:0017159	0.0123316	0.0733123	1	3	pantetheine hydrolase activity	MF	ENSSSCG00000004181	VNN1	GO:2001223	0.0118169	0.0483714	1	7	negative regulation of neuron migration	BP	ENSSSCG00000016034	COL3A1
GO:0060544	0.0125215	0.0733123	1	3	regulation of necroptotic process	BP	ENSSSCG00000016101	CFLAR	GO:0048193	0.0121698	0.0483714	1	7	Golgi vesicle transport	BP	ENSSSCG00000002455	GOLGA5
GO:1903076	0.0126382	0.0733123	1	4	regulation of protein localization to plasma membrane	BP	ENSSSCG00000004190	STX7	GO:2000772	0.0121948	0.0483714	1	6	regulation of cellular senescence	BP	ENSSSCG00000002389	VASH1
GO:0015886	0.0130191	0.0733123	1	3	heme transport	BP	ENSSSCG00000015590	FLVCR1	GO:0035845	0.0128668	0.0483714	1	7	photoreceptor cell outer segment organization	BP	ENSSSCG00000004166	AHI1
GO:0015232	0.0131288	0.0733123	1	3	heme transporter activity	MF	ENSSSCG00000015590	FLVCR1	GO:0031256	0.0129032	0.0483714	1	7	leading edge membrane	CC	ENSSSCG00000004209	PTPRK
GO:0002526	0.0135718	0.0733123	1	4	acute inflammatory response	BP	ENSSSCG00000004181	VNN1	GO:0008250	0.0131169	0.0483714	1	9	oligosaccharyltransferase complex	CC	ENSSSCG00000021988	TUSC3
GO:0001826	0.0136536	0.0733123	1	3	inner cell mass cell differentiation	BP	ENSSSCG00000022417	HNF1B	GO:0042101	0.0132067	0.0483714	1	9	T cell receptor complex	CC	ENSSSCG00000013111	CD6
GO:0051106	0.0136974	0.0733123	1	3	positive regulation of DNA ligation	BP	ENSSSCG00000008346	APLF	GO:0006488	0.0134812	0.0483714	1	8	dolichol-linked oligosaccharide biosynthetic process	BP	ENSSSCG00000006885	ALG14
GO:0031265	0.0137219	0.0733123	1	3	CD95 death-inducing signaling complex	CC	ENSSSCG00000026940	CASP10	GO:0042594	0.0135013	0.0483714	1	8	response to starvation	BP	ENSSSCG00000004101	LRP11
GO:0003956	0.0137586	0.0733123	1	6	NAD(P)+-protein-arginine ADP-ribosyltransferase activity	MF	ENSSSCG00000008976	ART3	GO:0043206	0.0137898	0.0483714	1	6	extracellular fibril organization	BP	ENSSSCG00000016034	COL3A1
GO:0006919	0.0139296	0.0733123	2	52	activation of cysteine-type endopeptidase activity involved in apoptotic process	BP	ENSSSCG00000016101,ENSSSCG00000026940	CFLAR,CASP10	GO:0010314	0.013953	0.0483714	1	7	phosphatidylinositol-5-phosphate binding	MF	ENSSSCG00000025977	SNX24
GO:0060323	0.0139845	0.0733123	1	4	head morphogenesis	BP	ENSSSCG00000015590	FLVCR1	GO:0019239	0.0140502	0.0483714	1	9	deaminase activity	MF	ENSSSCG00000004710	ADAL
GO:0005245	0.0142504	0.0733123	2	58	voltage-gated calcium channel activity	MF	ENSSSCG00000015402,ENSSSCG00000000082	CACNA2D1,CACNA1I	GO:0001525	0.0141611	0.0483714	2	102	angiogenesis	BP	ENSSSCG00000002389,ENSSSCG00000015037	VASH1,IL18
GO:0048211	0.0144525	0.0733123	1	3	Golgi vesicle docking	BP	ENSSSCG00000017316	--	GO:0042384	0.0143379	0.0483714	2	95	cilium assembly	BP	ENSSSCG00000017635,ENSSSCG00000004166	MKS1,AHI1
GO:0001916	0.0144639	0.0733123	1	4	positive regulation of T cell mediated cytotoxicity	BP	ENSSSCG00000004190	STX7	GO:0060322	0.014346	0.0483714	1	8	head development	BP	ENSSSCG00000017635	MKS1
GO:0072095	0.0145734	0.0733123	1	3	regulation of branch elongation involved in ureteric bud branching	BP	ENSSSCG00000022417	HNF1B	GO:0035025	0.0146477	0.0483714	1	9	positive regulation of Rho protein signal transduction	BP	ENSSSCG00000016034	COL3A1
GO:0071008	0.0146309	0.0733123	1	3	U2-type post-mRNA release spliceosomal complex	CC	ENSSSCG00000008756	DHX15	GO:0048407	0.0147037	0.0483714	1	8	platelet-derived growth factor binding	MF	ENSSSCG00000016034	COL3A1
GO:0036486	0.0146948	0.0733123	1	3	ventral trunk neural crest cell migration	BP	ENSSSCG00000026383	NRP2	GO:0036038	0.0148292	0.0483714	1	9	TCTN-B9D complex	CC	ENSSSCG00000017635	MKS1
GO:0097490	0.0146948	0.0733123	1	3	sympathetic neuron projection extension	BP	ENSSSCG00000026383	NRP2	GO:0042346	0.0158875	0.0507142	1	10	positive regulation of NF-kappaB import into nucleus	BP	ENSSSCG00000015037	IL18
GO:0097491	0.0146948	0.0733123	1	3	sympathetic neuron projection guidance	BP	ENSSSCG00000026383	NRP2	GO:0040037	0.015938	0.0507142	1	9	negative regulation of fibroblast growth factor receptor signaling pathway	BP	ENSSSCG00000007457	SULF2
GO:1901166	0.0146948	0.0733123	1	3	neural crest cell migration involved in autonomic nervous system development	BP	ENSSSCG00000026383	NRP2	GO:0034614	0.016399	0.0507142	1	10	cellular response to reactive oxygen species	BP	ENSSSCG00000004209	PTPRK
GO:1902285	0.0146948	0.0733123	1	3	semaphorin-plexin signaling pathway involved in neuron projection guidance	BP	ENSSSCG00000026383	NRP2	GO:0004000	0.0167473	0.0507142	1	10	adenosine deaminase activity	MF	ENSSSCG00000004710	ADAL
GO:0060261	0.014981	0.0737463	1	5	positive regulation of transcription initiation from RNA polymerase II promoter	BP	ENSSSCG00000022417	HNF1B	GO:0070986	0.0168982	0.0507142	1	9	left/right axis specification	BP	ENSSSCG00000004166	AHI1
GO:0036094	0.0151066	0.0737463	1	9	small molecule binding	MF	ENSSSCG00000005485	AMBP	GO:0009612	0.0169886	0.0507142	1	11	response to mechanical stimulus	BP	ENSSSCG00000004101	LRP11
GO:0019800	0.0156102	0.0753941	1	5	peptide cross-linking via chondroitin 4-sulfate glycosaminoglycan	BP	ENSSSCG00000016848	EGFLAM	GO:0004620	0.0170024	0.0507142	1	11	phospholipase activity	MF	ENSSSCG00000023351	PLA2G4A
GO:0000808	0.0161381	0.0771233	1	7	origin recognition complex	CC	ENSSSCG00000015427	ORC5	GO:0004697	0.0170281	0.0507142	1	10	protein kinase C activity	MF	ENSSSCG00000001975	--
GO:0048793	0.0165979	0.0784944	1	5	pronephros development	BP	ENSSSCG00000022417	HNF1B	GO:0009314	0.0175105	0.0515901	1	11	response to radiation	BP	ENSSSCG00000016034	COL3A1
GO:0070820	0.0170394	0.0790448	1	4	tertiary granule	CC	ENSSSCG00000004190	STX7	GO:0015693	0.018394	0.0536165	1	11	magnesium ion transport	BP	ENSSSCG00000021988	TUSC3
GO:0000075	0.0170625	0.0790448	1	4	cell cycle checkpoint	BP	ENSSSCG00000015960	--	GO:0050795	0.0190267	0.054877	1	8	regulation of behavior	BP	ENSSSCG00000004166	AHI1
GO:0005664	0.0175873	0.0797948	1	5	nuclear origin of replication recognition complex	CC	ENSSSCG00000015427	ORC5	GO:0010839	0.0193402	0.0552002	1	10	negative regulation of keratinocyte proliferation	BP	ENSSSCG00000004209	PTPRK
GO:0005737	0.0178973	0.0797948	20	3410	cytoplasm	CC	ENSSSCG00000025243,ENSSSCG00000028471,ENSSSCG00000010429,ENSSSCG00000000199,ENSSSCG00000015335,ENSSSCG00000021292,ENSSSCG00000015427,ENSSSCG00000016323,ENSSSCG00000006872,ENSSSCG00000008756,ENSSSCG00000000119,ENSSSCG00000016101,ENSSSCG00000026940,ENSSSCG00000003877,ENSSSCG00000007607,ENSSSCG00000013315,ENSSSCG00000015587,ENSSSCG00000005135,ENSSSCG00000021036,ENSSSCG00000015960	SGIP1,DTHD1,PRKG1,--,DYNC1I1,OSBPL9,ORC5,COPS8,--,DHX15,EIF3L,CFLAR,CASP10,FAF1,KPNA7,EIF3M,--,--,RAB3B,--	GO:0043537	0.01967	0.0555627	1	11	negative regulation of blood vessel endothelial cell migration	BP	ENSSSCG00000002389	VASH1
GO:0031264	0.0180618	0.0797948	1	4	death-inducing signaling complex	CC	ENSSSCG00000016101	CFLAR	GO:0048041	0.0198813	0.0555865	1	11	focal adhesion assembly	BP	ENSSSCG00000004209	PTPRK
GO:0075525	0.0181832	0.0797948	1	4	viral translational termination-reinitiation	BP	ENSSSCG00000000119	EIF3L	GO:0043495	0.021152	0.0584945	1	12	protein anchor	MF	ENSSSCG00000006885	ALG14
GO:1900745	0.0183153	0.0797948	1	6	positive regulation of p38MAPK cascade	BP	ENSSSCG00000022860	SASH1	GO:0010842	0.0213798	0.0584945	1	12	retina layer formation	BP	ENSSSCG00000004166	AHI1
GO:0046620	0.0183957	0.0797948	1	5	regulation of organ growth	BP	ENSSSCG00000015590	FLVCR1	GO:0031295	0.0215619	0.0584945	1	14	T cell costimulation	BP	ENSSSCG00000013115	CD5
GO:0071541	0.0184547	0.0797948	1	5	eukaryotic translation initiation factor 3 complex, eIF3m	CC	ENSSSCG00000013315	EIF3M	GO:0009409	0.0219716	0.0590217	1	14	response to cold	BP	ENSSSCG00000004101	LRP11
GO:0048471	0.018882	0.080872	4	268	perinuclear region of cytoplasm	CC	ENSSSCG00000016323,ENSSSCG00000003877,ENSSSCG00000021036,ENSSSCG00000004190	COPS8,FAF1,RAB3B,STX7	GO:0034394	0.0226255	0.0598215	1	13	protein localization to cell surface	BP	ENSSSCG00000004209	PTPRK
GO:1902176	0.019249	0.0808961	1	6	negative regulation of oxidative stress-induced intrinsic apoptotic signaling pathway	BP	ENSSSCG00000004181	VNN1	GO:0002092	0.0228783	0.0598215	1	15	positive regulation of receptor internalization	BP	ENSSSCG00000004166	AHI1
GO:0030122	0.019282	0.0808961	1	4	AP-2 adaptor complex	CC	ENSSSCG00000025243	SGIP1	GO:0045295	0.0229243	0.0598215	1	10	gamma-catenin binding	MF	ENSSSCG00000004209	PTPRK
GO:0061551	0.0194875	0.0808961	1	4	trigeminal ganglion development	BP	ENSSSCG00000026383	NRP2	GO:0001530	0.0238904	0.0617545	1	15	lipopolysaccharide binding	MF	ENSSSCG00000013111	CD6
GO:0016790	0.0196004	0.0808961	1	6	thiolester hydrolase activity	MF	ENSSSCG00000027279	--	GO:0070273	0.0244881	0.0617642	1	13	phosphatidylinositol-4-phosphate binding	MF	ENSSSCG00000025977	SNX24
GO:0060087	0.0200141	0.0818593	1	6	relaxation of vascular smooth muscle	BP	ENSSSCG00000010429	PRKG1	GO:0003779	0.0246418	0.0617642	3	201	actin binding	MF	ENSSSCG00000004081,ENSSSCG00000004132,ENSSSCG00000003654	--,PHACTR2,MACF1
GO:0070062	0.0213276	0.0864528	12	1778	extracellular exosome	CC	ENSSSCG00000014316,ENSSSCG00000016323,ENSSSCG00000015401,ENSSSCG00000008976,ENSSSCG00000015402,ENSSSCG00000005485,ENSSSCG00000005997,ENSSSCG00000007485,ENSSSCG00000005135,ENSSSCG00000021036,ENSSSCG00000004181,ENSSSCG00000004190	TGFBI,COPS8,PCLO,ART3,CACNA2D1,AMBP,COL14A1,BCAS1,--,RAB3B,VNN1,STX7	GO:0009395	0.0248295	0.0617642	1	15	phospholipid catabolic process	BP	ENSSSCG00000023351	PLA2G4A
GO:0072177	0.0220573	0.0879623	1	3	mesonephric duct development	BP	ENSSSCG00000022417	HNF1B	GO:0042104	0.0249234	0.0617642	1	16	positive regulation of activated T cell proliferation	BP	ENSSSCG00000015037	IL18
GO:0070682	0.0220875	0.0879623	1	6	proteasome regulatory particle assembly	BP	ENSSSCG00000028471	DTHD1	GO:0031226	0.0250213	0.0617642	1	15	intrinsic component of plasma membrane	CC	ENSSSCG00000013111	CD6
GO:0031369	0.0223557	0.0881156	1	8	translation initiation factor binding	MF	ENSSSCG00000013315	EIF3M	GO:0010596	0.0260141	0.0633689	1	15	negative regulation of endothelial cell migration	BP	ENSSSCG00000002389	VASH1
GO:0031666	0.0225141	0.0881156	1	7	positive regulation of lipopolysaccharide-mediated signaling pathway	BP	ENSSSCG00000022860	SASH1	GO:0042517	0.0261339	0.0633689	1	17	positive regulation of tyrosine phosphorylation of Stat3 protein	BP	ENSSSCG00000015037	IL18
GO:0033089	0.0234802	0.0911113	1	8	positive regulation of T cell differentiation in thymus	BP	ENSSSCG00000004181	VNN1	GO:0015095	0.0264036	0.0634613	1	16	magnesium ion transmembrane transporter activity	MF	ENSSSCG00000021988	TUSC3
GO:0007050	0.02427	0.0920557	2	54	cell cycle arrest	BP	ENSSSCG00000000874,ENSSSCG00000015960	GAS2L3,--	GO:0002063	0.026859	0.0639946	1	14	chondrocyte development	BP	ENSSSCG00000007457	SULF2
GO:0086002	0.0248082	0.0920557	1	7	cardiac muscle cell action potential involved in contraction	BP	ENSSSCG00000015402	CACNA2D1	GO:0005911	0.0271144	0.0640461	2	116	cell-cell junction	CC	ENSSSCG00000004209,ENSSSCG00000004166	PTPRK,AHI1
GO:0021675	0.0250075	0.0920557	1	6	nerve development	BP	ENSSSCG00000026383	NRP2	GO:0045662	0.027774	0.0650433	1	18	negative regulation of myoblast differentiation	BP	ENSSSCG00000015037	IL18
GO:0090331	0.025238	0.0920557	1	6	negative regulation of platelet aggregation	BP	ENSSSCG00000010429	PRKG1	GO:0019789	0.028476	0.0659966	1	14	SUMO transferase activity	MF	ENSSSCG00000027567	--
GO:0034098	0.0252831	0.0920557	1	6	VCP-NPL4-UFD1 AAA ATPase complex	CC	ENSSSCG00000003877	FAF1	GO:0004623	0.0286628	0.0659966	1	20	phospholipase A2 activity	MF	ENSSSCG00000023351	PLA2G4A
GO:0005021	0.025532	0.0920557	1	6	vascular endothelial growth factor-activated receptor activity	MF	ENSSSCG00000026383	NRP2	GO:0060122	0.0296195	0.0676311	1	15	inner ear receptor stereocilium organization	BP	ENSSSCG00000017635	MKS1
GO:0038084	0.025532	0.0920557	1	6	vascular endothelial growth factor signaling pathway	BP	ENSSSCG00000026383	NRP2	GO:0031513	0.0304823	0.0684091	1	16	nonmotile primary cilium	CC	ENSSSCG00000004166	AHI1
GO:0055037	0.0255407	0.0920557	2	61	recycling endosome	CC	ENSSSCG00000015335,ENSSSCG00000004190	DYNC1I1,STX7	GO:0030902	0.0305244	0.0684091	1	17	hindbrain development	BP	ENSSSCG00000004166	AHI1
GO:0072164	0.0255485	0.0920557	1	5	mesonephric tubule development	BP	ENSSSCG00000022417	HNF1B	GO:0010575	0.0307092	0.0684091	1	18	positive regulation of vascular endothelial growth factor production	BP	ENSSSCG00000007457	SULF2
GO:0030198	0.0258731	0.0924913	2	59	extracellular matrix organization	BP	ENSSSCG00000016848,ENSSSCG00000014316	EGFLAM,TGFBI	GO:0060384	0.0313676	0.0693123	1	15	innervation	BP	ENSSSCG00000007457	SULF2
GO:0061549	0.0261238	0.0926577	1	6	sympathetic ganglion development	BP	ENSSSCG00000026383	NRP2	GO:0008589	0.0327864	0.0718679	1	14	regulation of smoothened signaling pathway	BP	ENSSSCG00000017635	MKS1
GO:0001764	0.0267864	0.0929722	2	68	neuron migration	BP	ENSSSCG00000010429,ENSSSCG00000026383	PRKG1,NRP2	GO:0004864	0.0336887	0.0732596	1	22	protein phosphatase inhibitor activity	MF	ENSSSCG00000004132	PHACTR2
GO:0007250	0.0268021	0.0929722	1	10	activation of NF-kappaB-inducing kinase activity	BP	ENSSSCG00000016323	COPS8	GO:0008484	0.0371745	0.0802033	1	25	sulfuric ester hydrolase activity	MF	ENSSSCG00000007457	SULF2
GO:0005381	0.0269414	0.0929722	1	6	iron ion transmembrane transporter activity	MF	ENSSSCG00000009641	SLC25A37	GO:0045786	0.0404791	0.0866506	1	23	negative regulation of cell cycle	BP	ENSSSCG00000004209	PTPRK
GO:0042582	0.0270316	0.0929722	1	8	azurophil granule	CC	ENSSSCG00000004190	STX7	GO:0009408	0.0410208	0.0869578	1	24	response to heat	BP	ENSSSCG00000004101	LRP11
GO:0060993	0.027644	0.0940543	1	9	kidney morphogenesis	BP	ENSSSCG00000022417	HNF1B	GO:0032729	0.0415955	0.0869578	1	27	positive regulation of interferon-gamma production	BP	ENSSSCG00000015037	IL18
GO:0005980	0.0277605	0.0940543	1	6	glycogen catabolic process	BP	ENSSSCG00000006872	--	GO:0060828	0.0418408	0.0869578	1	17	regulation of canonical Wnt signaling pathway	BP	ENSSSCG00000017635	MKS1
GO:0000012	0.0283014	0.0951765	1	7	single strand break repair	BP	ENSSSCG00000008346	APLF	GO:0035058	0.0418921	0.0869578	1	23	nonmotile primary cilium assembly	BP	ENSSSCG00000017635	MKS1
GO:0005868	0.0286842	0.0955732	1	7	cytoplasmic dynein complex	CC	ENSSSCG00000015335	DYNC1I1	GO:0030177	0.0447829	0.0910486	1	27	positive regulation of Wnt signaling pathway	BP	ENSSSCG00000007457	SULF2
GO:0060429	0.0288404	0.0955732	1	6	epithelium development	BP	ENSSSCG00000022417	HNF1B	GO:0001772	0.0448427	0.0910486	1	26	immunological synapse	CC	ENSSSCG00000013111	CD6
GO:0010388	0.0298231	0.0975633	1	9	cullin deneddylation	BP	ENSSSCG00000016323	COPS8	GO:0018149	0.0448597	0.0910486	1	19	peptide cross-linking	BP	ENSSSCG00000016034	COL3A1
GO:0003906	0.0298707	0.0975633	1	13	DNA-(apurinic or apyrimidinic site) lyase activity	MF	ENSSSCG00000008346	APLF	GO:0035869	0.0452107	0.0910862	1	20	ciliary transition zone	CC	ENSSSCG00000017635	MKS1
GO:0048260	0.0300867	0.0975668	1	7	positive regulation of receptor-mediated endocytosis	BP	ENSSSCG00000025243	SGIP1	GO:0005575	0.0457959	0.0915917	1	31	cellular_component	CC	ENSSSCG00000004101	LRP11
GO:0048846	0.031053	0.0999864	1	7	axon extension involved in axon guidance	BP	ENSSSCG00000026383	NRP2	GO:0046332	0.0462682	0.0918659	1	27	SMAD binding	MF	ENSSSCG00000016034	COL3A1
GO:0005578	0.0316374	0.10115	3	181	proteinaceous extracellular matrix	CC	ENSSSCG00000016848,ENSSSCG00000014316,ENSSSCG00000015506	EGFLAM,TGFBI,TNN	GO:0051219	0.0466149	0.0918883	1	25	phosphoprotein binding	MF	ENSSSCG00000004101	LRP11
GO:0005522	0.0323079	0.102572	1	4	profilin binding	MF	ENSSSCG00000015401	PCLO	GO:0071407	0.0477295	0.0934135	1	29	cellular response to organic cyclic compound	BP	ENSSSCG00000015037	IL18
GO:0019869	0.0327488	0.10325	1	7	chloride channel inhibitor activity	MF	ENSSSCG00000004190	STX7	GO:0001937	0.0508223	0.098761	1	22	negative regulation of endothelial cell proliferation	BP	ENSSSCG00000002389	VASH1
GO:0021612	0.033082	0.103581	1	8	facial nerve structural organization	BP	ENSSSCG00000026383	NRP2	GO:0045765	0.0526659	0.101623	1	22	regulation of angiogenesis	BP	ENSSSCG00000002389	VASH1
GO:0005614	0.0340691	0.105737	1	8	interstitial matrix	CC	ENSSSCG00000016848	EGFLAM	GO:0005912	0.0539296	0.103334	1	30	adherens junction	CC	ENSSSCG00000004166	AHI1
GO:0050673	0.0342365	0.105737	1	8	epithelial cell proliferation	BP	ENSSSCG00000022417	HNF1B	GO:0008625	0.0563929	0.10665	1	29	extrinsic apoptotic signaling pathway via death domain receptors	BP	ENSSSCG00000015037	IL18
GO:0015093	0.0374794	0.113861	1	10	ferrous iron transmembrane transporter activity	MF	ENSSSCG00000009641	SLC25A37	GO:0032266	0.0564388	0.10665	1	25	phosphatidylinositol-3-phosphate binding	MF	ENSSSCG00000025977	SNX24
GO:0004197	0.0377888	0.113861	2	78	cysteine-type endopeptidase activity	MF	ENSSSCG00000016101,ENSSSCG00000026940	CFLAR,CASP10	GO:0005801	0.0568754	0.106739	1	27	cis-Golgi network	CC	ENSSSCG00000002455	GOLGA5
GO:0051393	0.0380199	0.113861	1	9	alpha-actinin binding	MF	ENSSSCG00000027279	--	GO:0043086	0.057683	0.107518	1	34	negative regulation of catalytic activity	BP	ENSSSCG00000004132	PHACTR2
GO:0042176	0.0380916	0.113861	1	11	regulation of protein catabolic process	BP	ENSSSCG00000003877	FAF1	GO:0060348	0.0584103	0.107571	1	31	bone development	BP	ENSSSCG00000007457	SULF2
GO:0006839	0.0381207	0.113861	1	11	mitochondrial transport	BP	ENSSSCG00000015590	FLVCR1	GO:0048754	0.0587463	0.107571	1	21	branching morphogenesis of an epithelial tube	BP	ENSSSCG00000017635	MKS1
GO:0009314	0.0387189	0.114892	1	11	response to radiation	BP	ENSSSCG00000015960	--	GO:0034097	0.0588893	0.107571	1	38	response to cytokine	BP	ENSSSCG00000016034	COL3A1
GO:0048557	0.0392242	0.1153	1	12	embryonic digestive tract morphogenesis	BP	ENSSSCG00000022417	HNF1B	GO:0042102	0.0596029	0.107848	1	41	positive regulation of T cell proliferation	BP	ENSSSCG00000013111	CD6
GO:0005539	0.0394722	0.1153	1	12	glycosaminoglycan binding	MF	ENSSSCG00000016848	EGFLAM	GO:0007157	0.0603853	0.107848	1	34	heterophilic cell-cell adhesion via plasma membrane cell adhesion molecules	BP	ENSSSCG00000013111	CD6
GO:0031435	0.0396186	0.1153	1	9	mitogen-activated protein kinase kinase kinase binding	MF	ENSSSCG00000022860	SASH1	GO:0005783	0.0604415	0.107848	3	514	endoplasmic reticulum	CC	ENSSSCG00000002389,ENSSSCG00000023351,ENSSSCG00000007457	VASH1,PLA2G4A,SULF2
GO:0030518	0.0402376	0.115883	1	11	intracellular steroid hormone receptor signaling pathway	BP	ENSSSCG00000012391	MED30	GO:0030199	0.0606153	0.107848	1	23	collagen fibril organization	BP	ENSSSCG00000016034	COL3A1
GO:0010942	0.0403293	0.115883	1	12	positive regulation of cell death	BP	ENSSSCG00000003877	FAF1	GO:0071230	0.0614862	0.108692	1	37	cellular response to amino acid stimulus	BP	ENSSSCG00000016034	COL3A1
GO:1901224	0.0407545	0.116368	1	10	positive regulation of NIK/NF-kappaB signaling	BP	ENSSSCG00000022860	SASH1	GO:0034644	0.0631069	0.110842	1	28	cellular response to UV	BP	ENSSSCG00000004209	PTPRK
GO:0016811	0.0414739	0.11643	1	13	hydrolase activity, acting on carbon-nitrogen (but not peptide) bonds, in linear amides	MF	ENSSSCG00000004181	VNN1	GO:0005201	0.0636949	0.111162	1	30	extracellular matrix structural constituent	MF	ENSSSCG00000016034	COL3A1
GO:0060307	0.0415036	0.11643	1	10	regulation of ventricular cardiac muscle cell membrane repolarization	BP	ENSSSCG00000015402	CACNA2D1	GO:0001947	0.0682051	0.117536	1	38	heart looping	BP	ENSSSCG00000004166	AHI1
GO:0009116	0.0415455	0.11643	1	15	nucleoside metabolic process	BP	ENSSSCG00000005135	--	GO:0005544	0.0712659	0.122043	1	46	calcium-dependent phospholipid binding	MF	ENSSSCG00000023351	PLA2G4A
GO:0097320	0.0418996	0.116702	1	9	membrane tubulation	BP	ENSSSCG00000025243	SGIP1	GO:0050890	0.073768	0.125543	1	24	cognition	BP	ENSSSCG00000021988	TUSC3
GO:1902042	0.0421724	0.116745	1	11	negative regulation of extrinsic apoptotic signaling pathway via death domain receptors	BP	ENSSSCG00000016101	CFLAR	GO:0042060	0.0754161	0.127556	1	34	wound healing	BP	ENSSSCG00000016034	COL3A1
GO:0006816	0.0424815	0.116888	2	84	calcium ion transport	BP	ENSSSCG00000015402,ENSSSCG00000000082	CACNA2D1,CACNA1I	GO:0001750	0.0774158	0.129946	1	34	photoreceptor outer segment	CC	ENSSSCG00000004209	PTPRK
GO:0035418	0.0427473	0.116911	1	7	protein localization to synapse	BP	ENSSSCG00000015401	PCLO	GO:0030176	0.0777781	0.129946	1	46	integral component of endoplasmic reticulum membrane	CC	ENSSSCG00000006885	ALG14
GO:0031334	0.0434609	0.118151	1	12	positive regulation of protein complex assembly	BP	ENSSSCG00000003877	FAF1	GO:0007229	0.0787809	0.130257	1	48	integrin-mediated signaling pathway	BP	ENSSSCG00000016034	COL3A1
GO:0005978	0.0439852	0.118865	1	10	glycogen biosynthetic process	BP	ENSSSCG00000006872	--	GO:0005515	0.0811683	0.132046	21	8838	protein binding	MF	ENSSSCG00000024966,ENSSSCG00000004081,ENSSSCG00000002455,ENSSSCG00000000924,ENSSSCG00000004101,ENSSSCG00000004209,ENSSSCG00000013111,ENSSSCG00000014427,ENSSSCG00000013115,ENSSSCG00000016034,ENSSSCG00000002389,ENSSSCG00000003654,ENSSSCG00000011103,ENSSSCG00000023351,ENSSSCG00000000880,ENSSSCG00000004032,ENSSSCG00000017635,ENSSSCG00000004166,ENSSSCG00000015037,ENSSSCG00000011873,ENSSSCG00000004202	TRIM77,--,GOLGA5,C12orf50,LRP11,PTPRK,CD6,FBXO38,CD5,COL3A1,VASH1,MACF1,PARD3,PLA2G4A,--,--,MKS1,AHI1,IL18,HSPBAP1,SAMD3
GO:0030247	0.0445384	0.119647	1	13	polysaccharide binding	MF	ENSSSCG00000006872	--	GO:0072372	0.0819852	0.132046	1	34	primary cilium	CC	ENSSSCG00000004166	AHI1
GO:0016226	0.0453424	0.120778	1	16	iron-sulfur cluster assembly	BP	ENSSSCG00000027492	--	GO:0051216	0.0820696	0.132046	1	37	cartilage development	BP	ENSSSCG00000007457	SULF2
GO:0035145	0.0454911	0.120778	1	12	exon-exon junction complex	CC	ENSSSCG00000003849	MAGOH	GO:0032886	0.0823813	0.132046	1	8	regulation of microtubule-based process	BP	ENSSSCG00000003654	MACF1
GO:0016180	0.0477017	0.125015	1	11	snRNA processing	BP	ENSSSCG00000015602	--	GO:0048565	0.0825688	0.132046	1	28	digestive tract development	BP	ENSSSCG00000016034	COL3A1
GO:0032039	0.0477017	0.125015	1	11	integrator complex	CC	ENSSSCG00000015602	--	GO:0005581	0.0832229	0.132046	1	44	collagen trimer	CC	ENSSSCG00000016034	COL3A1
GO:0016234	0.0479131	0.125015	1	11	inclusion body	CC	ENSSSCG00000006872	--	GO:0045454	0.084813	0.132046	1	58	cell redox homeostasis	BP	ENSSSCG00000021988	TUSC3
GO:1902043	0.0482221	0.125102	1	13	positive regulation of extrinsic apoptotic signaling pathway via death domain receptors	BP	ENSSSCG00000003877	FAF1	GO:0090286	0.0848749	0.132046	1	12	cytoskeletal anchoring at nuclear membrane	BP	ENSSSCG00000004081	--
GO:0034707	0.0487969	0.125562	1	12	chloride channel complex	CC	ENSSSCG00000017238	TTYH2	GO:0010976	0.0848877	0.132046	1	40	positive regulation of neuron projection development	BP	ENSSSCG00000014427	FBXO38
GO:0007010	0.0491225	0.125562	2	79	cytoskeleton organization	BP	ENSSSCG00000015401,ENSSSCG00000015960	PCLO,--	GO:0034993	0.084914	0.132046	1	12	LINC complex	CC	ENSSSCG00000004081	--
GO:0043123	0.0493689	0.125562	2	101	positive regulation of I-kappaB kinase/NF-kappaB signaling	BP	ENSSSCG00000016101,ENSSSCG00000026940	CFLAR,CASP10	GO:0030155	0.0852998	0.132046	1	34	regulation of cell adhesion	BP	ENSSSCG00000015037	IL18
GO:0008219	0.0495426	0.125562	1	16	cell death	BP	ENSSSCG00000003877	FAF1	GO:0034613	0.0884351	0.13613	1	35	cellular protein localization	BP	ENSSSCG00000004166	AHI1
GO:0072583	0.0497822	0.125562	1	12	clathrin-mediated endocytosis	BP	ENSSSCG00000025243	SGIP1	GO:0021987	0.0894706	0.136955	1	36	cerebral cortex development	BP	ENSSSCG00000016034	COL3A1
GO:0004520	0.0502281	0.125987	1	19	endodeoxyribonuclease activity	MF	ENSSSCG00000008346	APLF	GO:0071222	0.091399	0.13913	1	58	cellular response to lipopolysaccharide	BP	ENSSSCG00000015037	IL18
GO:0030667	0.0506913	0.12645	1	19	secretory granule membrane	CC	ENSSSCG00000021036	RAB3B	GO:0016525	0.0928933	0.140623	1	44	negative regulation of angiogenesis	BP	ENSSSCG00000002389	VASH1
GO:0030553	0.0515827	0.127353	1	13	cGMP binding	MF	ENSSSCG00000010429	PRKG1	GO:0043001	0.0934495	0.140688	1	15	Golgi to plasma membrane protein transport	BP	ENSSSCG00000003654	MACF1
GO:0008234	0.0518939	0.127353	2	91	cysteine-type peptidase activity	MF	ENSSSCG00000016101,ENSSSCG00000026940	CFLAR,CASP10	GO:0045177	0.0942954	0.141185	1	52	apical part of cell	CC	ENSSSCG00000002389	VASH1
GO:0047496	0.0518951	0.127353	1	12	vesicle transport along microtubule	BP	ENSSSCG00000015335	DYNC1I1	GO:0001568	0.0955589	0.1423	1	40	blood vessel development	BP	ENSSSCG00000016034	COL3A1
GO:0005790	0.0525476	0.128261	1	9	smooth endoplasmic reticulum	CC	ENSSSCG00000007058	PLCB4	GO:0007417	0.0990304	0.146672	1	42	central nervous system development	BP	ENSSSCG00000004166	AHI1
GO:0006915	0.0528466	0.128301	2	109	apoptotic process	BP	ENSSSCG00000016101,ENSSSCG00000026940	CFLAR,CASP10	GO:0090263	0.100048	0.147383	1	47	positive regulation of canonical Wnt signaling pathway	BP	ENSSSCG00000007457	SULF2
GO:0030742	0.053569	0.129363	1	13	GTP-dependent protein binding	MF	ENSSSCG00000021036	RAB3B	GO:0016042	0.101957	0.149391	1	58	lipid catabolic process	BP	ENSSSCG00000023351	PLA2G4A
GO:0001525	0.0547113	0.131423	2	102	angiogenesis	BP	ENSSSCG00000026383,ENSSSCG00000014316	NRP2,TGFBI	GO:0007160	0.105245	0.152424	1	58	cell-matrix adhesion	BP	ENSSSCG00000016034	COL3A1
GO:0046966	0.0563287	0.134596	1	16	thyroid hormone receptor binding	MF	ENSSSCG00000012391	MED30	GO:0005178	0.105473	0.152424	1	61	integrin binding	MF	ENSSSCG00000016034	COL3A1
GO:0018345	0.0572768	0.134923	1	16	protein palmitoylation	BP	ENSSSCG00000015607	HHAT	GO:0005794	0.105695	0.152424	3	568	Golgi apparatus	CC	ENSSSCG00000002455,ENSSSCG00000003654,ENSSSCG00000023351	GOLGA5,MACF1,PLA2G4A
GO:0008047	0.0573632	0.134923	1	18	enzyme activator activity	MF	ENSSSCG00000016101	CFLAR	GO:0007368	0.107892	0.154777	1	43	determination of left/right symmetry	BP	ENSSSCG00000017635	MKS1
GO:0051059	0.0576454	0.134923	1	17	NF-kappaB binding	MF	ENSSSCG00000003877	FAF1	GO:0030336	0.109679	0.156522	1	54	negative regulation of cell migration	BP	ENSSSCG00000004209	PTPRK
GO:0031489	0.0576541	0.134923	1	15	myosin V binding	MF	ENSSSCG00000021036	RAB3B	GO:0043588	0.111369	0.158109	1	32	skin development	BP	ENSSSCG00000016034	COL3A1
GO:0051924	0.0582659	0.135655	1	16	regulation of calcium ion transport	BP	ENSSSCG00000015402	CACNA2D1	GO:0045773	0.113227	0.159918	1	15	positive regulation of axon extension	BP	ENSSSCG00000003654	MACF1
GO:0030111	0.0590795	0.136536	1	18	regulation of Wnt signaling pathway	BP	ENSSSCG00000022417	HNF1B	GO:0009986	0.115696	0.162367	2	329	cell surface	CC	ENSSSCG00000004209,ENSSSCG00000007457	PTPRK,SULF2
GO:0005795	0.0592457	0.136536	1	15	Golgi stack	CC	ENSSSCG00000017316	--	GO:0001843	0.116403	0.162367	1	59	neural tube closure	BP	ENSSSCG00000017635	MKS1
GO:0048278	0.0598856	0.136902	1	18	vesicle docking	BP	ENSSSCG00000004190	STX7	GO:0008013	0.116738	0.162367	1	55	beta-catenin binding	MF	ENSSSCG00000004209	PTPRK
GO:0007492	0.0602454	0.136902	1	17	endoderm development	BP	ENSSSCG00000022417	HNF1B	GO:0032587	0.117503	0.162605	1	30	ruffle membrane	CC	ENSSSCG00000003654	MACF1
GO:0017154	0.0604151	0.136902	1	16	semaphorin receptor activity	MF	ENSSSCG00000026383	NRP2	GO:0005813	0.122223	0.168287	2	317	centrosome	CC	ENSSSCG00000017635,ENSSSCG00000004166	MKS1,AHI1
GO:0016409	0.0607226	0.136902	1	18	palmitoyltransferase activity	MF	ENSSSCG00000015607	HHAT	GO:0004721	0.126828	0.173204	1	81	phosphoprotein phosphatase activity	MF	ENSSSCG00000004209	PTPRK
GO:0008540	0.0609124	0.136902	1	17	proteasome regulatory particle, base subcomplex	CC	ENSSSCG00000028471	DTHD1	GO:0032496	0.127059	0.173204	1	91	response to lipopolysaccharide	BP	ENSSSCG00000013111	CD6
GO:0005977	0.0614719	0.137219	1	19	glycogen metabolic process	BP	ENSSSCG00000006872	--	GO:0017137	0.129866	0.176154	1	70	Rab GTPase binding	MF	ENSSSCG00000002455	GOLGA5
GO:0030315	0.0616579	0.137219	1	12	T-tubule	CC	ENSSSCG00000015402	CACNA2D1	GO:0001822	0.136527	0.184277	1	59	kidney development	BP	ENSSSCG00000007457	SULF2
GO:0000184	0.0620093	0.137328	1	16	nuclear-transcribed mRNA catabolic process, nonsense-mediated decay	BP	ENSSSCG00000003849	MAGOH	GO:0005615	0.144166	0.193193	3	834	extracellular space	CC	ENSSSCG00000016034,ENSSSCG00000002389,ENSSSCG00000015037	COL3A1,VASH1,IL18
GO:0050840	0.062937	0.138125	1	15	extracellular matrix binding	MF	ENSSSCG00000014316	TGFBI	GO:0000165	0.144542	0.193193	1	72	MAPK cascade	BP	ENSSSCG00000015037	IL18
GO:0005689	0.0629778	0.138125	1	21	U12-type spliceosomal complex	CC	ENSSSCG00000008756	DHX15	GO:0035091	0.147704	0.196461	1	73	phosphatidylinositol binding	MF	ENSSSCG00000025977	SNX24
GO:0006471	0.0656114	0.142633	1	18	protein ADP-ribosylation	BP	ENSSSCG00000008976	ART3	GO:0007030	0.149179	0.197464	1	67	Golgi organization	BP	ENSSSCG00000002455	GOLGA5
GO:0030902	0.0656612	0.142633	1	17	hindbrain development	BP	ENSSSCG00000022417	HNF1B	GO:0007169	0.157301	0.207213	1	100	transmembrane receptor protein tyrosine kinase signaling pathway	BP	ENSSSCG00000004166	AHI1
GO:0006906	0.0667087	0.144218	1	20	vesicle fusion	BP	ENSSSCG00000004190	STX7	GO:0035335	0.159537	0.209154	1	97	peptidyl-tyrosine dephosphorylation	BP	ENSSSCG00000004209	PTPRK
GO:0030521	0.0689161	0.148108	1	17	androgen receptor signaling pathway	BP	ENSSSCG00000012391	MED30	GO:0008152	0.161737	0.210899	4	1133	metabolic process	BP	ENSSSCG00000027567,ENSSSCG00000003654,ENSSSCG00000023351,ENSSSCG00000007457	--,MACF1,PLA2G4A,SULF2
GO:0031593	0.0691606	0.148108	1	19	polyubiquitin binding	MF	ENSSSCG00000006872	--	GO:0004725	0.162407	0.210899	1	97	protein tyrosine phosphatase activity	MF	ENSSSCG00000004209	PTPRK
GO:0030507	0.0696859	0.148532	1	13	spectrin binding	MF	ENSSSCG00000015335	DYNC1I1	GO:0005829	0.163362	0.211137	3	759	cytosol	CC	ENSSSCG00000015462,ENSSSCG00000023351,ENSSSCG00000004032	TPK1,PLA2G4A,--
GO:0070588	0.0712866	0.150568	2	121	calcium ion transmembrane transport	BP	ENSSSCG00000015402,ENSSSCG00000000082	CACNA2D1,CACNA1I	GO:0005929	0.169802	0.218431	1	84	cilium	CC	ENSSSCG00000004166	AHI1
GO:0045930	0.0715178	0.150568	1	19	negative regulation of mitotic cell cycle	BP	ENSSSCG00000010809	BRINP3	GO:0016791	0.175412	0.224593	1	109	phosphatase activity	MF	ENSSSCG00000004209	PTPRK
GO:0043169	0.0717389	0.150568	1	25	cation binding	MF	ENSSSCG00000006872	--	GO:0042803	0.176922	0.225473	2	439	protein homodimerization activity	MF	ENSSSCG00000004081,ENSSSCG00000002455	--,GOLGA5
GO:0007257	0.0723304	0.150568	1	19	activation of JUN kinase activity	BP	ENSSSCG00000015960	--	GO:0043025	0.181329	0.230019	1	103	neuronal cell body	CC	ENSSSCG00000004209	PTPRK
GO:0004709	0.0724522	0.150568	1	19	MAP kinase kinase kinase activity	MF	ENSSSCG00000015960	--	GO:0051015	0.18543	0.234137	1	101	actin filament binding	MF	ENSSSCG00000004081	--
GO:0020037	0.0729331	0.150568	2	141	heme binding	MF	ENSSSCG00000005485,ENSSSCG00000023320	AMBP,--	GO:0009897	0.195093	0.245208	1	136	external side of plasma membrane	CC	ENSSSCG00000013115	CD5
GO:0071479	0.0730934	0.150568	1	21	cellular response to ionizing radiation	BP	ENSSSCG00000015602	--	GO:0016055	0.201461	0.252056	1	84	Wnt signaling pathway	BP	ENSSSCG00000003654	MACF1
GO:0008408	0.0732941	0.150568	1	20	3'-5' exonuclease activity	MF	ENSSSCG00000008346	APLF	GO:0005635	0.202585	0.25231	1	84	nuclear envelope	CC	ENSSSCG00000004081	--
GO:0005905	0.0736798	0.150679	1	19	coated pit	CC	ENSSSCG00000025243	SGIP1	GO:0000139	0.203812	0.25269	1	126	Golgi membrane	CC	ENSSSCG00000002455	GOLGA5
GO:0031072	0.0751711	0.152776	1	22	heat shock protein binding	MF	ENSSSCG00000003877	FAF1	GO:0005125	0.212414	0.262169	1	174	cytokine activity	MF	ENSSSCG00000015037	IL18
GO:0036464	0.0755607	0.152776	1	20	cytoplasmic ribonucleoprotein granule	CC	ENSSSCG00000015335	DYNC1I1	GO:0016311	0.213877	0.26279	1	137	dephosphorylation	BP	ENSSSCG00000004209	PTPRK
GO:0010811	0.0757326	0.152776	1	22	positive regulation of cell-substrate adhesion	BP	ENSSSCG00000016848	EGFLAM	GO:0006629	0.220829	0.270121	1	140	lipid metabolic process	BP	ENSSSCG00000023351	PLA2G4A
GO:0019228	0.0763826	0.152776	1	21	neuronal action potential	BP	ENSSSCG00000000082	CACNA1I	GO:0006470	0.224516	0.272314	1	148	protein dephosphorylation	BP	ENSSSCG00000004209	PTPRK
GO:0035108	0.0766554	0.152776	1	17	limb morphogenesis	BP	ENSSSCG00000015590	FLVCR1	GO:0030424	0.22461	0.272314	1	109	axon	CC	ENSSSCG00000004209	PTPRK
GO:0006891	0.0767318	0.152776	1	25	intra-Golgi vesicle-mediated transport	BP	ENSSSCG00000017316	--	GO:0007050	0.230639	0.278393	1	54	cell cycle arrest	BP	ENSSSCG00000003654	MACF1
GO:0009306	0.0770611	0.152776	1	25	protein secretion	BP	ENSSSCG00000021036	RAB3B	GO:0006954	0.241013	0.289639	1	181	inflammatory response	BP	ENSSSCG00000015037	IL18
GO:0043001	0.077755	0.153482	1	15	Golgi to plasma membrane protein transport	BP	ENSSSCG00000017316	--	GO:0030425	0.24288	0.290608	1	119	dendrite	CC	ENSSSCG00000004209	PTPRK
GO:0000381	0.078864	0.154769	1	24	regulation of alternative mRNA splicing, via spliceosome	BP	ENSSSCG00000003849	MAGOH	GO:0016192	0.255387	0.304243	1	158	vesicle-mediated transport	BP	ENSSSCG00000004166	AHI1
GO:0009749	0.0790888	0.154769	1	21	response to glucose	BP	ENSSSCG00000022417	HNF1B	GO:0016477	0.260987	0.309569	1	147	cell migration	BP	ENSSSCG00000004209	PTPRK
GO:0019882	0.0799829	0.155847	1	27	antigen processing and presentation	BP	ENSSSCG00000021036	RAB3B	GO:0031012	0.263972	0.31176	1	154	extracellular matrix	CC	ENSSSCG00000016034	COL3A1
GO:0035861	0.0811158	0.157379	1	21	site of double-strand break	CC	ENSSSCG00000008346	APLF	GO:0042127	0.282467	0.332172	1	180	regulation of cell proliferation	BP	ENSSSCG00000023351	PLA2G4A
GO:0016810	0.0816096	0.157663	1	23	hydrolase activity, acting on carbon-nitrogen (but not peptide) bonds	MF	ENSSSCG00000004181	VNN1	GO:0005874	0.295288	0.345765	1	130	microtubule	CC	ENSSSCG00000003654	MACF1
GO:0005506	0.0831936	0.160042	2	147	iron ion binding	MF	ENSSSCG00000023320,ENSSSCG00000027492	--,--	GO:0005578	0.298805	0.348394	1	181	proteinaceous extracellular matrix	CC	ENSSSCG00000016034	COL3A1
GO:0044822	0.0857612	0.164187	6	855	poly(A) RNA binding	MF	ENSSSCG00000000199,ENSSSCG00000003849,ENSSSCG00000008756,ENSSSCG00000000119,ENSSSCG00000005997,ENSSSCG00000015960	--,MAGOH,DHX15,EIF3L,COL14A1,--	GO:0006955	0.308042	0.357642	1	257	immune response	BP	ENSSSCG00000015037	IL18
GO:0016712	0.0860718	0.164187	1	29	oxidoreductase activity, acting on paired donors, with incorporation or reduction of molecular oxygen, reduced flavin or flavoprotein as one donor, and incorporation of one atom of oxygen	MF	ENSSSCG00000023320	--	GO:0008285	0.318409	0.368119	1	207	negative regulation of cell proliferation	BP	ENSSSCG00000004209	PTPRK
GO:0008180	0.0868199	0.164921	1	24	COP9 signalosome	CC	ENSSSCG00000016323	COPS8	GO:0007507	0.324393	0.373461	1	158	heart development	BP	ENSSSCG00000016034	COL3A1
GO:0016358	0.0879746	0.165342	1	22	dendrite development	BP	ENSSSCG00000010429	PRKG1	GO:0010628	0.326724	0.37457	1	212	positive regulation of gene expression	BP	ENSSSCG00000015037	IL18
GO:0048754	0.0880534	0.165342	1	21	branching morphogenesis of an epithelial tube	BP	ENSSSCG00000022417	HNF1B	GO:0008017	0.328946	0.375546	1	153	microtubule binding	MF	ENSSSCG00000003654	MACF1
GO:0048786	0.0881336	0.165342	1	18	presynaptic active zone	CC	ENSSSCG00000015401	PCLO	GO:0008284	0.375169	0.425575	1	249	positive regulation of cell proliferation	BP	ENSSSCG00000015037	IL18
GO:0001772	0.0942398	0.175723	1	26	immunological synapse	CC	ENSSSCG00000004190	STX7	GO:0005856	0.375872	0.425575	1	173	cytoskeleton	CC	ENSSSCG00000003654	MACF1
GO:0006807	0.0947195	0.175723	1	23	nitrogen compound metabolic process	BP	ENSSSCG00000004181	VNN1	GO:0019901	0.382829	0.431667	1	233	protein kinase binding	MF	ENSSSCG00000004209	PTPRK
GO:0005488	0.0948284	0.175723	4	386	binding	MF	ENSSSCG00000007607,ENSSSCG00000027791,ENSSSCG00000013315,ENSSSCG00000015602	KPNA7,--,EIF3M,--	GO:0005509	0.394025	0.442471	2	613	calcium ion binding	MF	ENSSSCG00000003654,ENSSSCG00000023351	MACF1,PLA2G4A
GO:0006367	0.0953087	0.175895	1	33	transcription initiation from RNA polymerase II promoter	BP	ENSSSCG00000012391	MED30	GO:0043066	0.396295	0.443062	1	272	negative regulation of apoptotic process	BP	ENSSSCG00000004166	AHI1
GO:0086091	0.0966716	0.177688	1	23	regulation of heart rate by cardiac conduction	BP	ENSSSCG00000015402	CACNA2D1	GO:0004842	0.397786	0.443062	1	248	ubiquitin-protein transferase activity	MF	ENSSSCG00000004032	--
GO:0004435	0.09805	0.179495	1	22	phosphatidylinositol phospholipase C activity	MF	ENSSSCG00000007058	PLCB4	GO:0016567	0.399755	0.443453	1	253	protein ubiquitination	BP	ENSSSCG00000004032	--
GO:0030218	0.0986795	0.179922	1	29	erythrocyte differentiation	BP	ENSSSCG00000015590	FLVCR1	GO:0016887	0.415199	0.458728	1	200	ATPase activity	MF	ENSSSCG00000003654	MACF1
GO:0004190	0.101124	0.183641	1	37	aspartic-type endopeptidase activity	MF	ENSSSCG00000015401	PCLO	GO:0046872	0.417781	0.459727	4	1742	metal ion binding	MF	ENSSSCG00000024966,ENSSSCG00000026570,ENSSSCG00000023351,ENSSSCG00000001975	TRIM77,SNAI2,PLA2G4A,--
GO:0019933	0.102702	0.185404	1	24	cAMP-mediated signaling	BP	ENSSSCG00000015401	PCLO	GO:0016787	0.423679	0.464352	2	811	hydrolase activity	MF	ENSSSCG00000004209,ENSSSCG00000023351	PTPRK,PLA2G4A
GO:0071300	0.103483	0.185404	1	26	cellular response to retinoic acid	BP	ENSSSCG00000010809	BRINP3	GO:0007155	0.433065	0.472748	1	267	cell adhesion	BP	ENSSSCG00000004209	PTPRK
GO:0008026	0.103856	0.185404	1	25	ATP-dependent helicase activity	MF	ENSSSCG00000008756	DHX15	GO:0045892	0.465972	0.506652	1	339	negative regulation of transcription, DNA-templated	BP	ENSSSCG00000004209	PTPRK
GO:0004674	0.104283	0.185404	3	291	protein serine/threonine kinase activity	MF	ENSSSCG00000010429,ENSSSCG00000015587,ENSSSCG00000015960	PRKG1,--,--	GO:0035556	0.482526	0.522578	1	334	intracellular signal transduction	BP	ENSSSCG00000001975	--
GO:0048536	0.104669	0.185404	1	31	spleen development	BP	ENSSSCG00000015590	FLVCR1	GO:0042802	0.520879	0.561893	1	390	identical protein binding	MF	ENSSSCG00000004166	AHI1
GO:0008380	0.104988	0.185404	1	29	RNA splicing	BP	ENSSSCG00000003849	MAGOH	GO:0003824	0.552741	0.593926	1	486	catalytic activity	MF	ENSSSCG00000007457	SULF2
GO:0030136	0.105016	0.185404	1	25	clathrin-coated vesicle	CC	ENSSSCG00000025243	SGIP1	GO:0008270	0.569304	0.609333	2	993	zinc ion binding	MF	ENSSSCG00000024966,ENSSSCG00000027567	TRIM77,--
GO:0032947	0.105386	0.185404	1	25	protein complex scaffold	MF	ENSSSCG00000022860	SASH1	GO:0016021	0.575754	0.613839	9	5551	integral component of membrane	CC	ENSSSCG00000002455,ENSSSCG00000004101,ENSSSCG00000004209,ENSSSCG00000013111,ENSSSCG00000013115,ENSSSCG00000021988,ENSSSCG00000001047,ENSSSCG00000029688,ENSSSCG00000023192	GOLGA5,LRP11,PTPRK,CD6,CD5,TUSC3,--,--,--
GO:0030139	0.10577	0.185404	1	32	endocytic vesicle	CC	ENSSSCG00000004190	STX7	GO:0005622	0.580203	0.616184	2	1154	intracellular	CC	ENSSSCG00000024966,ENSSSCG00000001975	TRIM77,--
GO:0043507	0.10646	0.185896	1	27	positive regulation of JUN kinase activity	BP	ENSSSCG00000022860	SASH1	GO:0003676	0.594164	0.628575	2	1079	nucleic acid binding	MF	ENSSSCG00000003654,ENSSSCG00000026570	MACF1,SNAI2
GO:0001104	0.10722	0.185956	1	36	RNA polymerase II transcription cofactor activity	MF	ENSSSCG00000012391	MED30	GO:0005576	0.63416	0.668307	1	676	extracellular region	CC	ENSSSCG00000015037	IL18
GO:0007416	0.107314	0.185956	1	25	synapse assembly	BP	ENSSSCG00000015401	PCLO	GO:0006468	0.679665	0.713518	1	601	protein phosphorylation	BP	ENSSSCG00000001975	--
GO:0016592	0.108771	0.187765	1	36	mediator complex	CC	ENSSSCG00000012391	MED30	GO:0045944	0.736069	0.767024	1	692	positive regulation of transcription from RNA polymerase II promoter	BP	ENSSSCG00000004166	AHI1
GO:0070509	0.109824	0.188864	1	37	calcium ion import	BP	ENSSSCG00000000082	CACNA1I	GO:0005524	0.736231	0.767024	2	1327	ATP binding	MF	ENSSSCG00000015462,ENSSSCG00000001975	TPK1,--
GO:0016529	0.113152	0.193853	1	21	sarcoplasmic reticulum	CC	ENSSSCG00000015402	CACNA2D1	GO:0005737	0.79269	0.821349	5	3410	cytoplasm	CC	ENSSSCG00000014427,ENSSSCG00000002389,ENSSSCG00000003654,ENSSSCG00000023351,ENSSSCG00000017635	FBXO38,VASH1,MACF1,PLA2G4A,MKS1
GO:0005768	0.113918	0.194431	2	154	endosome	CC	ENSSSCG00000021036,ENSSSCG00000004190	RAB3B,STX7	GO:0044822	0.811697	0.836109	1	855	poly(A) RNA binding	MF	ENSSSCG00000003654	MACF1
GO:0006904	0.114835	0.195262	1	36	vesicle docking involved in exocytosis	BP	ENSSSCG00000021036	RAB3B	GO:0007165	0.851028	0.87334	2	2059	signal transduction	BP	ENSSSCG00000004209,ENSSSCG00000029688	PTPRK,--
GO:0006606	0.115763	0.196105	1	33	protein import into nucleus	BP	ENSSSCG00000007607	KPNA7	GO:0005886	0.856351	0.875523	3	2703	plasma membrane	CC	ENSSSCG00000013115,ENSSSCG00000003654,ENSSSCG00000007457	CD5,MACF1,SULF2
GO:0010595	0.116336	0.196344	1	31	positive regulation of endothelial cell migration	BP	ENSSSCG00000022860	SASH1	GO:0005739	0.865133	0.881214	1	1102	mitochondrion	CC	ENSSSCG00000004032	--
GO:0005484	0.117579	0.197707	1	42	SNAP receptor activity	MF	ENSSSCG00000004190	STX7	GO:0004930	0.891292	0.904496	1	1492	G-protein coupled receptor activity	MF	ENSSSCG00000023192	--
GO:0006412	0.118931	0.199242	2	272	translation	BP	ENSSSCG00000000119,ENSSSCG00000013315	EIF3L,EIF3M	GO:0007186	0.910275	0.919366	1	1612	G-protein coupled receptor signaling pathway	BP	ENSSSCG00000023192	--
GO:0051536	0.120564	0.201235	1	36	iron-sulfur cluster binding	MF	ENSSSCG00000027492	--	GO:0016020	0.912656	0.919366	8	6640	membrane	CC	ENSSSCG00000002455,ENSSSCG00000004101,ENSSSCG00000004209,ENSSSCG00000013111,ENSSSCG00000013115,ENSSSCG00000021988,ENSSSCG00000001047,ENSSSCG00000017635	GOLGA5,LRP11,PTPRK,CD6,CD5,TUSC3,--,MKS1
GO:0003705	0.122359	0.203484	1	35	transcription factor activity, RNA polymerase II distal enhancer sequence-specific binding	MF	ENSSSCG00000022417	HNF1B	GO:0070062	0.97073	0.974286	1	1778	extracellular exosome	CC	ENSSSCG00000015037	IL18
GO:0015631	0.124872	0.206904	1	37	tubulin binding	MF	ENSSSCG00000025243	SGIP1	GO:0005634	0.998704	0.998704	1	3342	nucleus	CC	ENSSSCG00000014427	FBXO38
GO:0042981	0.126063	0.208118	2	192	regulation of apoptotic process	BP	ENSSSCG00000016101,ENSSSCG00000026940	CFLAR,CASP10	GO:0002092	0.0646602	0.155655	1	15	positive regulation of receptor internalization	BP
GO:0048704	0.126908	0.208754	1	42	embryonic skeletal system morphogenesis	BP	ENSSSCG00000015590	FLVCR1	GO:0016226	0.0653268	0.15669	1	16	iron-sulfur cluster assembly	BP
GO:0031012	0.129236	0.211817	2	154	extracellular matrix	CC	ENSSSCG00000014316,ENSSSCG00000005997	TGFBI,COL14A1	GO:0045295	0.0664557	0.158822	1	10	gamma-catenin binding	MF
GO:0017124	0.130071	0.212418	1	34	SH3 domain binding	MF	ENSSSCG00000025243	SGIP1	GO:0031012	0.0671596	0.159927	3	154	extracellular matrix	CC
GO:0001889	0.132777	0.215261	1	33	liver development	BP	ENSSSCG00000022417	HNF1B	GO:0034707	0.0678709	0.160292	1	12	chloride channel complex	CC
GO:0050919	0.133193	0.215261	1	38	negative chemotaxis	BP	ENSSSCG00000026383	NRP2	GO:0034394	0.068156	0.160292	1	13	protein localization to cell surface	BP
GO:0030141	0.133234	0.215261	1	43	secretory granule	CC	ENSSSCG00000021036	RAB3B	GO:0016180	0.0683605	0.160292	1	11	snRNA processing	BP
GO:0019003	0.134297	0.216209	1	40	GDP binding	MF	ENSSSCG00000021036	RAB3B	GO:0032039	0.0683605	0.160292	1	11	integrator complex	CC
GO:0016079	0.136282	0.218629	1	40	synaptic vesicle exocytosis	BP	ENSSSCG00000021036	RAB3B	GO:0048471	0.0685238	0.160292	4	268	perinuclear region of cytoplasm	CC
GO:0000149	0.137345	0.218848	1	47	SNARE binding	MF	ENSSSCG00000004190	STX7	GO:0003779	0.068932	0.16068	4	201	actin binding	MF
GO:0019827	0.13771	0.218848	1	40	stem cell population maintenance	BP	ENSSSCG00000012391	MED30	GO:0005615	0.0708874	0.163998	7	834	extracellular space	CC
GO:0031625	0.137864	0.218848	2	182	ubiquitin protein ligase binding	MF	ENSSSCG00000026940,ENSSSCG00000003877	CASP10,FAF1	GO:0008219	0.0709986	0.163998	1	16	cell death	BP
GO:0043130	0.13923	0.219802	1	43	ubiquitin binding	MF	ENSSSCG00000003877	FAF1	GO:0072583	0.0710989	0.163998	1	12	clathrin-mediated endocytosis	BP
GO:0005518	0.139434	0.219802	1	40	collagen binding	MF	ENSSSCG00000014316	TGFBI	GO:0030553	0.0714323	0.164195	1	13	cGMP binding	MF
GO:0030155	0.140288	0.220383	1	34	regulation of cell adhesion	BP	ENSSSCG00000003877	FAF1	GO:0070273	0.0730157	0.167254	1	13	phosphatidylinositol-4-phosphate binding	MF
GO:0008017	0.141497	0.220928	2	153	microtubule binding	MF	ENSSSCG00000025243,ENSSSCG00000000874	SGIP1,GAS2L3	GO:0030667	0.0735256	0.167707	1	19	secretory granule membrane	CC
GO:0045666	0.141608	0.220928	1	44	positive regulation of neuron differentiation	BP	ENSSSCG00000010809	BRINP3	GO:0001530	0.073965	0.167707	1	15	lipopolysaccharide binding	MF
GO:0086010	0.142991	0.222322	1	50	membrane depolarization during action potential	BP	ENSSSCG00000000082	CACNA1I	GO:0031226	0.0739736	0.167707	1	15	intrinsic component of plasma membrane	CC
GO:0031201	0.148157	0.229567	1	53	SNARE complex	CC	ENSSSCG00000004190	STX7	GO:0035091	0.0742532	0.167767	2	73	phosphatidylinositol binding	MF
GO:0001755	0.150124	0.231825	1	46	neural crest cell migration	BP	ENSSSCG00000026383	NRP2	GO:0005737	0.0754331	0.169853	25	3410	cytoplasm	CC
GO:0030900	0.152338	0.234445	1	43	forebrain development	BP	ENSSSCG00000010429	PRKG1	GO:0045662	0.0763528	0.170178	1	18	negative regulation of myoblast differentiation	BP
GO:0050839	0.154082	0.236328	1	44	cell adhesion molecule binding	MF	ENSSSCG00000014316	TGFBI	GO:0042517	0.0767989	0.170178	1	17	positive regulation of tyrosine phosphorylation of Stat3 protein	BP
GO:0001568	0.155965	0.23815	1	40	blood vessel development	BP	ENSSSCG00000015590	FLVCR1	GO:0019789	0.0768808	0.170178	1	14	SUMO transferase activity	MF
GO:0006302	0.156319	0.23815	1	37	double-strand break repair	BP	ENSSSCG00000008346	APLF	GO:0015095	0.0770096	0.170178	1	16	magnesium ion transmembrane transporter activity	MF
GO:0003712	0.158875	0.241235	1	45	transcription cofactor activity	MF	ENSSSCG00000012391	MED30	GO:0004520	0.0770867	0.170178	1	19	endodeoxyribonuclease activity	MF
GO:0032436	0.164994	0.249691	1	49	positive regulation of proteasomal ubiquitin-dependent protein catabolic process	BP	ENSSSCG00000028471	DTHD1	GO:0060307	0.0771197	0.170178	1	10	regulation of ventricular cardiac muscle cell membrane repolarization	BP
GO:0042733	0.166837	0.25123	1	44	embryonic digit morphogenesis	BP	ENSSSCG00000015590	FLVCR1	GO:0004623	0.078005	0.171559	1	20	phospholipase A2 activity	MF
GO:0003725	0.167118	0.25123	1	42	double-stranded RNA binding	MF	ENSSSCG00000008756	DHX15	GO:0009395	0.0785754	0.172242	1	15	phospholipid catabolic process	BP
GO:0006821	0.171744	0.257043	1	48	chloride transport	BP	ENSSSCG00000017238	TTYH2	GO:0004197	0.0791601	0.17295	2	78	cysteine-type endopeptidase activity	MF
GO:0012505	0.172117	0.257043	1	56	endomembrane system	CC	ENSSSCG00000004190	STX7	GO:0030742	0.0799219	0.17404	1	13	GTP-dependent protein binding	MF
GO:0005254	0.173456	0.258194	1	50	chloride channel activity	MF	ENSSSCG00000017238	TTYH2	GO:0051059	0.0803265	0.174348	1	17	NF-kappaB binding	MF
GO:0006869	0.177328	0.26266	1	55	lipid transport	BP	ENSSSCG00000021292	OSBPL9	GO:0018345	0.081231	0.175479	1	16	protein palmitoylation	BP
GO:1903955	0.178073	0.26266	1	52	positive regulation of protein targeting to mitochondrion	BP	ENSSSCG00000015607	HHAT	GO:0008047	0.0813776	0.175479	1	18	enzyme activator activity	MF
GO:0005681	0.178262	0.26266	1	54	spliceosomal complex	CC	ENSSSCG00000008756	DHX15	GO:0030111	0.083216	0.178034	1	18	regulation of Wnt signaling pathway	BP
GO:0006810	0.178771	0.26266	5	848	transport	BP	ENSSSCG00000021292,ENSSSCG00000009641,ENSSSCG00000007607,ENSSSCG00000000082,ENSSSCG00000017238	OSBPL9,SLC25A37,KPNA7,CACNA1I,TTYH2	GO:0005795	0.0833228	0.178034	1	15	Golgi stack	CC
GO:0032482	0.180193	0.263167	1	63	Rab protein signal transduction	BP	ENSSSCG00000021036	RAB3B	GO:0048278	0.0836318	0.178034	1	18	vesicle docking	BP
GO:0008021	0.180275	0.263167	1	56	synaptic vesicle	CC	ENSSSCG00000021036	RAB3B	GO:0010596	0.0836381	0.178034	1	15	negative regulation of endothelial cell migration	BP
GO:0007224	0.181868	0.264641	1	56	smoothened signaling pathway	BP	ENSSSCG00000015607	HHAT	GO:0002063	0.084232	0.178723	1	14	chondrocyte development	BP
GO:0000776	0.183739	0.266494	1	52	kinetochore	CC	ENSSSCG00000015335	DYNC1I1	GO:0008540	0.084676	0.178937	1	17	proteasome regulatory particle, base subcomplex	CC
GO:0005604	0.184315	0.266494	1	44	basement membrane	CC	ENSSSCG00000016848	EGFLAM	GO:0031489	0.0851363	0.178937	1	15	myosin V binding	MF
GO:0002020	0.185482	0.26733	1	56	protease binding	MF	ENSSSCG00000016101	CFLAR	GO:0046966	0.0852663	0.178937	1	16	thyroid hormone receptor binding	MF
GO:0005634	0.187472	0.269342	15	3342	nucleus	CC	ENSSSCG00000028471,ENSSSCG00000015335,ENSSSCG00000015427,ENSSSCG00000016323,ENSSSCG00000006872,ENSSSCG00000003849,ENSSSCG00000008756,ENSSSCG00000003877,ENSSSCG00000008346,ENSSSCG00000007058,ENSSSCG00000007607,ENSSSCG00000022417,ENSSSCG00000012391,ENSSSCG00000008332,ENSSSCG00000015960	DTHD1,DYNC1I1,ORC5,COPS8,--,MAGOH,DHX15,FAF1,APLF,PLCB4,KPNA7,HNF1B,MED30,C2orf42,--	GO:1902043	0.0856482	0.178937	1	13	positive regulation of extrinsic apoptotic signaling pathway via death domain receptors	BP
GO:0016042	0.188157	0.269475	1	58	lipid catabolic process	BP	ENSSSCG00000007058	PLCB4	GO:0007492	0.0856845	0.178937	1	17	endoderm development	BP
GO:0019905	0.192368	0.274639	1	60	syntaxin binding	MF	ENSSSCG00000004190	STX7	GO:0004864	0.0865494	0.179736	1	22	protein phosphatase inhibitor activity	MF
GO:0072562	0.195354	0.278027	1	64	blood microparticle	CC	ENSSSCG00000005485	AMBP	GO:0016409	0.0866098	0.179736	1	18	palmitoyltransferase activity	MF
GO:0015031	0.198984	0.281926	2	248	protein transport	BP	ENSSSCG00000007607,ENSSSCG00000021036	KPNA7,RAB3B	GO:0060122	0.0871897	0.180366	1	15	inner ear receptor stereocilium organization	BP
GO:0007264	0.199335	0.281926	2	242	small GTPase mediated signal transduction	BP	ENSSSCG00000025602,ENSSSCG00000021036	--,RAB3B	GO:0000184	0.0876897	0.180366	1	16	nuclear-transcribed mRNA catabolic process, nonsense-mediated decay	BP
GO:0008081	0.200997	0.283394	1	54	phosphoric diester hydrolase activity	MF	ENSSSCG00000007058	PLCB4	GO:0060384	0.0879806	0.180366	1	15	innervation	BP
GO:0007219	0.203376	0.285541	1	64	Notch signaling pathway	BP	ENSSSCG00000022417	HNF1B	GO:0005977	0.0880033	0.180366	1	19	glycogen metabolic process	BP
GO:0005178	0.203778	0.285541	1	61	integrin binding	MF	ENSSSCG00000015506	TNN	GO:0050840	0.088513	0.180851	1	15	extracellular matrix binding	MF
GO:0004867	0.205314	0.286808	1	77	serine-type endopeptidase inhibitor activity	MF	ENSSSCG00000005485	AMBP	GO:0005689	0.0905274	0.184397	1	21	U12-type spliceosomal complex	CC
GO:0005543	0.207713	0.289268	1	66	phospholipid binding	MF	ENSSSCG00000025243	SGIP1	GO:0047496	0.0919288	0.186678	1	12	vesicle transport along microtubule	BP
GO:0007160	0.210032	0.291604	1	58	cell-matrix adhesion	BP	ENSSSCG00000015506	TNN	GO:0006471	0.0932592	0.188317	1	18	protein ADP-ribosylation	BP
GO:0031463	0.210995	0.292048	1	58	Cul3-RING ubiquitin ligase complex	CC	ENSSSCG00000008593	KLHL29	GO:0043123	0.0933051	0.188317	2	101	positive regulation of I-kappaB kinase/NF-kappaB signaling	BP
GO:0000226	0.212662	0.29346	1	55	microtubule cytoskeleton organization	BP	ENSSSCG00000000874	GAS2L3	GO:0010575	0.0960969	0.192293	1	18	positive regulation of vascular endothelial growth factor production	BP
GO:0035264	0.215623	0.296645	1	61	multicellular organism growth	BP	ENSSSCG00000015590	FLVCR1	GO:0016234	0.0961438	0.192293	1	11	inclusion body	CC
GO:0016887	0.21645	0.296884	2	200	ATPase activity	MF	ENSSSCG00000017316,ENSSSCG00000029837	--,--	GO:0006906	0.0964159	0.192293	1	20	vesicle fusion	BP
GO:0001822	0.219325	0.29992	1	59	kidney development	BP	ENSSSCG00000022417	HNF1B	GO:0008017	0.0964372	0.192293	3	153	microtubule binding	MF
GO:0009952	0.220477	0.300591	1	75	anterior/posterior pattern specification	BP	ENSSSCG00000022417	HNF1B	GO:0017154	0.0974966	0.193613	1	16	semaphorin receptor activity	MF
GO:0045766	0.221505	0.301088	1	66	positive regulation of angiogenesis	BP	ENSSSCG00000022860	SASH1	GO:0008589	0.0978726	0.193613	1	14	regulation of smoothened signaling pathway	BP
GO:0007409	0.223336	0.302671	1	66	axonogenesis	BP	ENSSSCG00000015506	TNN	GO:0031513	0.0979766	0.193613	1	16	nonmotile primary cilium	CC
GO:0008565	0.224629	0.303517	1	76	protein transporter activity	MF	ENSSSCG00000007607	KPNA7	GO:0030521	0.0990605	0.195173	1	17	androgen receptor signaling pathway	BP
GO:0006913	0.225701	0.30406	1	68	nucleocytoplasmic transport	BP	ENSSSCG00000021036	RAB3B	GO:0031593	0.0995812	0.195616	1	19	polyubiquitin binding	MF
GO:0005615	0.228994	0.307583	4	834	extracellular space	CC	ENSSSCG00000014316,ENSSSCG00000004245,ENSSSCG00000005485,ENSSSCG00000005997	TGFBI,FAM184A,AMBP,COL14A1	GO:0005522	0.100516	0.195918	1	4	profilin binding	MF
GO:0000922	0.23024	0.308345	1	60	spindle pole	CC	ENSSSCG00000015335	DYNC1I1	GO:0051924	0.100607	0.195918	1	16	regulation of calcium ion transport	BP
GO:0005262	0.231199	0.308719	1	61	calcium channel activity	MF	ENSSSCG00000000082	CACNA1I	GO:0045930	0.100623	0.195918	1	19	negative regulation of mitotic cell cycle	BP
GO:0000209	0.235142	0.31296	1	69	protein polyubiquitination	BP	ENSSSCG00000022860	SASH1	GO:0043169	0.102017	0.19762	1	25	cation binding	MF
GO:0019901	0.235754	0.31296	2	233	protein kinase binding	MF	ENSSSCG00000022860,ENSSSCG00000003877	SASH1,FAF1	GO:0005905	0.102642	0.19762	1	19	coated pit	CC
GO:0016337	0.237275	0.314061	1	65	single organismal cell-cell adhesion	BP	ENSSSCG00000004181	VNN1	GO:0071479	0.102746	0.19762	1	21	cellular response to ionizing radiation	BP
GO:0071013	0.238641	0.314165	1	74	catalytic step 2 spliceosome	CC	ENSSSCG00000003849	MAGOH	GO:0004709	0.102788	0.19762	1	19	MAP kinase kinase kinase activity	MF
GO:0005694	0.238737	0.314165	1	116	chromosome	CC	ENSSSCG00000015602	--	GO:0007257	0.102989	0.19762	1	19	activation of JUN kinase activity	BP
GO:0004004	0.245177	0.321706	1	71	ATP-dependent RNA helicase activity	MF	ENSSSCG00000008756	DHX15	GO:0008484	0.10372	0.198446	1	25	sulfuric ester hydrolase activity	MF
GO:0035091	0.248105	0.323749	1	73	phosphatidylinositol binding	MF	ENSSSCG00000015587	--	GO:0008234	0.104453	0.199274	2	91	cysteine-type peptidase activity	MF
GO:0043087	0.24816	0.323749	1	64	regulation of GTPase activity	BP	ENSSSCG00000010429	PRKG1	GO:0008408	0.105861	0.200896	1	20	3'-5' exonuclease activity	MF
GO:0006260	0.250184	0.325234	1	78	DNA replication	BP	ENSSSCG00000015427	ORC5	GO:0010811	0.105911	0.200896	1	22	positive regulation of cell-substrate adhesion	BP
GO:1902476	0.250731	0.325234	1	74	chloride transmembrane transport	BP	ENSSSCG00000017238	TTYH2	GO:0035418	0.107134	0.202086	1	7	protein localization to synapse	BP
GO:0004842	0.257274	0.332668	2	248	ubiquitin-protein transferase activity	MF	ENSSSCG00000008593,ENSSSCG00000004032	KLHL29,--	GO:0036464	0.107148	0.202086	1	20	cytoplasmic ribonucleoprotein granule	CC
GO:0006886	0.25803	0.332668	2	276	intracellular protein transport	BP	ENSSSCG00000021036,ENSSSCG00000004190	RAB3B,STX7	GO:0031072	0.107565	0.202295	1	22	heat shock protein binding	MF
GO:0004497	0.25866	0.332668	1	89	monooxygenase activity	MF	ENSSSCG00000023320	--	GO:0005635	0.108317	0.202797	2	84	nuclear envelope	CC
GO:0016567	0.260316	0.333291	2	253	protein ubiquitination	BP	ENSSSCG00000008593,ENSSSCG00000004032	KLHL29,--	GO:0042384	0.108444	0.202797	2	95	cilium assembly	BP
GO:0010951	0.260817	0.333291	1	104	negative regulation of endopeptidase activity	BP	ENSSSCG00000005485	AMBP	GO:0006891	0.108871	0.202859	1	25	intra-Golgi vesicle-mediated transport	BP
GO:0000784	0.261347	0.333291	1	78	nuclear chromosome, telomeric region	CC	ENSSSCG00000015427	ORC5	GO:0009306	0.109199	0.202859	1	25	protein secretion	BP
GO:0005770	0.266533	0.337641	1	74	late endosome	CC	ENSSSCG00000004190	STX7	GO:0006915	0.109397	0.202859	2	109	apoptotic process	BP
GO:0016705	0.267381	0.337641	1	95	oxidoreductase activity, acting on paired donors, with incorporation or reduction of molecular oxygen	MF	ENSSSCG00000023320	--	GO:0009749	0.111379	0.205957	1	21	response to glucose	BP
GO:0005802	0.267704	0.337641	1	82	trans-Golgi network	CC	ENSSSCG00000014316	TGFBI	GO:0060828	0.112642	0.207714	1	17	regulation of canonical Wnt signaling pathway	BP
GO:0004386	0.267733	0.337641	1	72	helicase activity	MF	ENSSSCG00000008756	DHX15	GO:0032729	0.113816	0.208387	1	27	positive regulation of interferon-gamma production	BP
GO:0005635	0.272714	0.34297	1	84	nuclear envelope	CC	ENSSSCG00000003877	FAF1	GO:0016810	0.113926	0.208387	1	23	hydrolase activity, acting on carbon-nitrogen (but not peptide) bonds	MF
GO:0005244	0.273695	0.343253	1	91	voltage-gated ion channel activity	MF	ENSSSCG00000000082	CACNA1I	GO:0000381	0.114228	0.208387	1	24	regulation of alternative mRNA splicing, via spliceosome	BP
GO:0034765	0.276413	0.345112	1	92	regulation of ion transmembrane transport	BP	ENSSSCG00000000082	CACNA1I	GO:0019882	0.114267	0.208387	1	27	antigen processing and presentation	BP
GO:0006396	0.276698	0.345112	1	79	RNA processing	BP	ENSSSCG00000008756	DHX15	GO:0035861	0.115927	0.210834	1	21	site of double-strand break	CC
GO:0007018	0.278942	0.346594	1	67	microtubule-based movement	BP	ENSSSCG00000015335	DYNC1I1	GO:0045786	0.117226	0.212328	1	23	negative regulation of cell cycle	BP
GO:0098779	0.279413	0.346594	1	89	mitophagy in response to mitochondrial depolarization	BP	ENSSSCG00000010429	PRKG1	GO:0019228	0.11739	0.212328	1	21	neuronal action potential	BP
GO:0006508	0.28882	0.357287	3	552	proteolysis	BP	ENSSSCG00000015401,ENSSSCG00000016101,ENSSSCG00000026940	PCLO,CFLAR,CASP10	GO:0006816	0.117744	0.212388	2	84	calcium ion transport	BP
GO:0007411	0.300924	0.371249	1	93	axon guidance	BP	ENSSSCG00000026383	NRP2	GO:0018149	0.119293	0.214597	1	19	peptide cross-linking	BP
GO:0032259	0.319312	0.392867	1	103	methylation	BP	ENSSSCG00000005135	--	GO:0016712	0.121716	0.218363	1	29	oxidoreductase activity, acting on paired donors, with incorporation or reduction of molecular oxygen, reduced flavin or flavoprotein as one donor, and incorporation of one atom of oxygen	MF
GO:0004872	0.326773	0.400959	1	112	receptor activity	MF	ENSSSCG00000012391	MED30	GO:0005575	0.123448	0.219883	1	31	cellular_component	CC
GO:0030036	0.328534	0.402033	1	105	actin cytoskeleton organization	BP	ENSSSCG00000000874	GAS2L3	GO:0030315	0.123554	0.219883	1	12	T-tubule	CC
GO:0008022	0.337578	0.41199	1	98	protein C-terminus binding	MF	ENSSSCG00000022860	SASH1	GO:0009408	0.12356	0.219883	1	24	response to heat	BP
GO:0015630	0.341805	0.416031	1	108	microtubule cytoskeleton	CC	ENSSSCG00000000874	GAS2L3	GO:0008180	0.123934	0.219958	1	24	COP9 signalosome	CC
GO:0005085	0.345245	0.419095	1	99	guanyl-nucleotide exchange factor activity	MF	ENSSSCG00000025602	--	GO:0045765	0.125716	0.222525	1	22	regulation of angiogenesis	BP
GO:0005769	0.346542	0.419547	1	107	early endosome	CC	ENSSSCG00000004190	STX7	GO:0035869	0.128236	0.226378	1	20	ciliary transition zone	CC
GO:0019904	0.355881	0.429168	1	122	protein domain specific binding	MF	ENSSSCG00000003877	FAF1	GO:0005790	0.128676	0.226551	1	9	smooth endoplasmic reticulum	CC
GO:0031965	0.35638	0.429168	1	103	nuclear membrane	CC	ENSSSCG00000008332	C2orf42	GO:0071407	0.129992	0.227792	1	29	cellular response to organic cyclic compound	BP
GO:0035556	0.365977	0.438557	2	334	intracellular signal transduction	BP	ENSSSCG00000007058,ENSSSCG00000015960	PLCB4,--	GO:0001937	0.130069	0.227792	1	22	negative regulation of endothelial cell proliferation	BP
GO:0030424	0.366108	0.438557	1	109	axon	CC	ENSSSCG00000026383	NRP2	GO:0035058	0.132072	0.230094	1	23	nonmotile primary cilium assembly	BP
GO:0016757	0.370203	0.442296	1	128	transferase activity, transferring glycosyl groups	MF	ENSSSCG00000008976	ART3	GO:0035108	0.132078	0.230094	1	17	limb morphogenesis	BP
GO:0045087	0.374933	0.44677	1	142	innate immune response	BP	ENSSSCG00000004181	VNN1	GO:0008625	0.132578	0.230359	1	29	extrinsic apoptotic signaling pathway via death domain receptors	BP
GO:0005765	0.377259	0.448365	1	124	lysosomal membrane	CC	ENSSSCG00000004190	STX7	GO:0030507	0.133423	0.231221	1	13	spectrin binding	MF
GO:0015629	0.387156	0.458926	1	129	actin cytoskeleton	CC	ENSSSCG00000000874	GAS2L3	GO:0006367	0.135552	0.234296	1	33	transcription initiation from RNA polymerase II promoter	BP
GO:0034220	0.388513	0.459336	1	155	ion transmembrane transport	BP	ENSSSCG00000000082	CACNA1I	GO:0020037	0.136767	0.235408	2	141	heme binding	MF
GO:0006468	0.391863	0.462093	3	601	protein phosphorylation	BP	ENSSSCG00000010429,ENSSSCG00000015587,ENSSSCG00000015960	PRKG1,--,--	GO:0051219	0.136915	0.235408	1	25	phosphoprotein binding	MF
GO:0006811	0.393824	0.462724	2	376	ion transport	BP	ENSSSCG00000000082,ENSSSCG00000017238	CACNA1I,TTYH2	GO:0030177	0.137262	0.235408	1	27	positive regulation of Wnt signaling pathway	BP
GO:0006629	0.394437	0.462724	1	140	lipid metabolic process	BP	ENSSSCG00000007058	PLCB4	GO:0046332	0.137725	0.235592	1	27	SMAD binding	MF
GO:0030425	0.399661	0.467644	1	119	dendrite	CC	ENSSSCG00000007058	PLCB4	GO:0007010	0.138796	0.236812	2	79	cytoskeleton organization	BP
GO:0005764	0.405024	0.472702	1	139	lysosome	CC	ENSSSCG00000004190	STX7	GO:0030218	0.140796	0.239607	1	29	erythrocyte differentiation	BP
GO:0006954	0.406909	0.473684	1	181	inflammatory response	BP	ENSSSCG00000004181	VNN1	GO:0016358	0.143256	0.243168	1	22	dendrite development	BP
GO:0000166	0.408087	0.47384	6	1335	nucleotide binding	MF	ENSSSCG00000010429,ENSSSCG00000008756,ENSSSCG00000017316,ENSSSCG00000008346,ENSSSCG00000021036,ENSSSCG00000015960	PRKG1,DHX15,--,APLF,RAB3B,--	GO:0005801	0.143799	0.243465	1	27	cis-Golgi network	CC
GO:0045893	0.421535	0.488207	2	373	positive regulation of transcription, DNA-templated	BP	ENSSSCG00000022417,ENSSSCG00000012391	HNF1B,MED30	GO:0043507	0.146102	0.246718	1	27	positive regulation of JUN kinase activity	BP
GO:0007165	0.426211	0.492366	6	2059	signal transduction	BP	ENSSSCG00000028471,ENSSSCG00000010429,ENSSSCG00000007058,ENSSSCG00000029688,ENSSSCG00000015587,ENSSSCG00000021036	DTHD1,PRKG1,PLCB4,--,--,RAB3B	GO:0008026	0.146465	0.246718	1	25	ATP-dependent helicase activity	MF
GO:0000287	0.427391	0.492476	1	162	magnesium ion binding	MF	ENSSSCG00000015960	--	GO:0048536	0.147673	0.248121	1	31	spleen development	BP
GO:0005667	0.431528	0.495731	1	147	transcription factor complex	CC	ENSSSCG00000022417	HNF1B	GO:0030136	0.148342	0.248202	1	25	clathrin-coated vesicle	CC
GO:0043065	0.4324	0.495731	1	147	positive regulation of apoptotic process	BP	ENSSSCG00000015960	--	GO:0004435	0.148767	0.248202	1	22	phosphatidylinositol phospholipase C activity	MF
GO:0016477	0.443204	0.506838	1	147	cell migration	BP	ENSSSCG00000015506	TNN	GO:0071300	0.149121	0.248202	1	26	cellular response to retinoic acid	BP
GO:0005743	0.447375	0.510322	1	198	mitochondrial inner membrane	CC	ENSSSCG00000009641	SLC25A37	GO:0042102	0.149221	0.248202	1	41	positive regulation of T cell proliferation	BP
GO:0016192	0.448769	0.510629	1	158	vesicle-mediated transport	BP	ENSSSCG00000004190	STX7	GO:0043086	0.150564	0.249601	1	34	negative regulation of catalytic activity	BP
GO:0006974	0.451648	0.512621	1	148	cellular response to DNA damage stimulus	BP	ENSSSCG00000008346	APLF	GO:0008380	0.150816	0.249601	1	29	RNA splicing	BP
GO:0045202	0.458578	0.519189	1	161	synapse	CC	ENSSSCG00000015401	PCLO	GO:0005506	0.151517	0.249873	2	147	iron ion binding	MF
GO:0007275	0.461022	0.520656	1	194	multicellular organismal development	BP	ENSSSCG00000013384	--	GO:0032266	0.151736	0.249873	1	25	phosphatidylinositol-3-phosphate binding	MF
GO:0042803	0.462654	0.521203	2	439	protein homodimerization activity	MF	ENSSSCG00000005485,ENSSSCG00000022417	AMBP,HNF1B	GO:0001104	0.152334	0.250236	1	36	RNA polymerase II transcription cofactor activity	MF
GO:0001701	0.464208	0.52166	1	151	in utero embryonic development	BP	ENSSSCG00000015590	FLVCR1	GO:0030139	0.154029	0.251914	1	32	endocytic vesicle	CC
GO:0005975	0.470422	0.527337	1	183	carbohydrate metabolic process	BP	ENSSSCG00000006872	--	GO:0016592	0.154117	0.251914	1	36	mediator complex	CC
GO:0007507	0.475358	0.531558	1	158	heart development	BP	ENSSSCG00000026383	NRP2	GO:0032886	0.15516	0.252994	1	8	regulation of microtubule-based process	BP
GO:0044212	0.484056	0.539955	1	157	transcription regulatory region DNA binding	MF	ENSSSCG00000022417	HNF1B	GO:0005912	0.158442	0.257712	1	30	adherens junction	CC
GO:0004713	0.491425	0.546831	2	409	protein tyrosine kinase activity	MF	ENSSSCG00000010429,ENSSSCG00000015960	PRKG1,--	GO:0030199	0.158947	0.257899	1	23	collagen fibril organization	BP
GO:0003824	0.494861	0.549307	2	486	catalytic activity	MF	ENSSSCG00000006872,ENSSSCG00000005135	--,--	GO:0070509	0.159979	0.258525	1	37	calcium ion import	BP
GO:0005856	0.505183	0.559398	1	173	cytoskeleton	CC	ENSSSCG00000000874	GAS2L3	GO:0006807	0.160114	0.258525	1	23	nitrogen compound metabolic process	BP
GO:0043231	0.522526	0.577194	2	460	intracellular membrane-bounded organelle	CC	ENSSSCG00000015587,ENSSSCG00000004190	--,STX7	GO:0070062	0.160507	0.25853	13	1778	extracellular exosome	CC
GO:0005216	0.529962	0.583987	1	203	ion channel activity	MF	ENSSSCG00000000082	CACNA1I	GO:0007157	0.162093	0.259295	1	34	heterophilic cell-cell adhesion via plasma membrane cell adhesion molecules	BP
GO:0008285	0.547885	0.600771	1	207	negative regulation of cell proliferation	BP	ENSSSCG00000016323	COPS8	GO:0086091	0.162438	0.259295	1	23	regulation of heart rate by cardiac conduction	BP
GO:0003924	0.548421	0.600771	1	239	GTPase activity	MF	ENSSSCG00000021036	RAB3B	GO:0006904	0.162624	0.259295	1	36	vesicle docking involved in exocytosis	BP
GO:0010628	0.549163	0.600771	1	212	positive regulation of gene expression	BP	ENSSSCG00000022417	HNF1B	GO:0030424	0.162747	0.259295	2	109	axon	CC
GO:0003779	0.569822	0.621642	1	201	actin binding	MF	ENSSSCG00000000874	GAS2L3	GO:0032947	0.162941	0.259295	1	25	protein complex scaffold	MF
GO:0016787	0.570979	0.621642	3	811	hydrolase activity	MF	ENSSSCG00000008756,ENSSSCG00000026940,ENSSSCG00000007058	DHX15,CASP10,PLCB4	GO:0090286	0.163917	0.260037	1	12	cytoskeletal anchoring at nuclear membrane	BP
GO:0005524	0.591113	0.642023	5	1327	ATP binding	MF	ENSSSCG00000010429,ENSSSCG00000008756,ENSSSCG00000017316,ENSSSCG00000029837,ENSSSCG00000015960	PRKG1,DHX15,--,--,--	GO:0010595	0.164257	0.260037	1	31	positive regulation of endothelial cell migration	BP
GO:0046982	0.5931	0.642643	1	291	protein heterodimerization activity	MF	ENSSSCG00000022417	HNF1B	GO:0034993	0.164864	0.260037	1	12	LINC complex	CC
GO:0043234	0.598503	0.646953	1	232	protein complex	CC	ENSSSCG00000022860	SASH1	GO:0005484	0.164978	0.260037	1	42	SNAP receptor activity	MF
GO:0004672	0.600903	0.648005	2	534	protein kinase activity	MF	ENSSSCG00000010429,ENSSSCG00000015960	PRKG1,--	GO:0034097	0.165827	0.260754	1	38	response to cytokine	BP
GO:0055085	0.608651	0.654805	2	551	transmembrane transport	BP	ENSSSCG00000015590,ENSSSCG00000000082	FLVCR1,CACNA1I	GO:0006606	0.166433	0.261087	1	33	protein import into nucleus	BP
GO:0008233	0.622066	0.667167	1	288	peptidase activity	MF	ENSSSCG00000026940	CASP10	GO:0019901	0.168031	0.262777	3	233	protein kinase binding	MF
GO:0043066	0.623081	0.667167	1	272	negative regulation of apoptotic process	BP	ENSSSCG00000022417	HNF1B	GO:0006629	0.168304	0.262777	2	140	lipid metabolic process	BP
GO:0005794	0.645822	0.68989	2	568	Golgi apparatus	CC	ENSSSCG00000010429,ENSSSCG00000021292	PRKG1,OSBPL9	GO:0051536	0.16921	0.263086	1	36	iron-sulfur cluster binding	MF
GO:0016740	0.654214	0.697214	2	576	transferase activity	MF	ENSSSCG00000010429,ENSSSCG00000008976	PRKG1,ART3	GO:0005911	0.169305	0.263086	2	116	cell-cell junction	CC
GO:0007155	0.656383	0.697888	1	267	cell adhesion	BP	ENSSSCG00000014316	TGFBI	GO:0070588	0.169751	0.263086	2	121	calcium ion transmembrane transport	BP
GO:0005509	0.66775	0.707487	2	613	calcium ion binding	MF	ENSSSCG00000016848,ENSSSCG00000007058	EGFLAM,PLCB4	GO:0003705	0.170092	0.263086	1	35	transcription factor activity, RNA polymerase II distal enhancer sequence-specific binding	MF
GO:0005525	0.668529	0.707487	1	343	GTP binding	MF	ENSSSCG00000021036	RAB3B	GO:0034644	0.171527	0.264688	1	28	cellular response to UV	BP
GO:0005886	0.681524	0.719563	7	2703	plasma membrane	CC	ENSSSCG00000025243,ENSSSCG00000010429,ENSSSCG00000005485,ENSSSCG00000000082,ENSSSCG00000021036,ENSSSCG00000017238,ENSSSCG00000004190	SGIP1,PRKG1,AMBP,CACNA1I,RAB3B,TTYH2,STX7	GO:0071230	0.172752	0.265912	1	37	cellular response to amino acid stimulus	BP
GO:0009986	0.686086	0.722698	1	329	cell surface	CC	ENSSSCG00000015506	TNN	GO:0060348	0.173124	0.265912	1	31	bone development	BP
GO:0005739	0.700748	0.736434	3	1102	mitochondrion	CC	ENSSSCG00000009641,ENSSSCG00000004032,ENSSSCG00000015590	SLC25A37,--,FLVCR1	GO:0006954	0.175596	0.268961	2	181	inflammatory response	BP
GO:0043547	0.714423	0.749071	1	316	positive regulation of GTPase activity	BP	ENSSSCG00000025602	--	GO:0048786	0.175921	0.268961	1	18	presynaptic active zone	CC
GO:0016301	0.716138	0.74914	1	314	kinase activity	MF	ENSSSCG00000010429	PRKG1	GO:0016887	0.178196	0.271579	3	200	ATPase activity	MF
GO:0005654	0.722629	0.754192	4	1246	nucleoplasm	CC	ENSSSCG00000016323,ENSSSCG00000000119,ENSSSCG00000008346,ENSSSCG00000022417	COPS8,EIF3L,APLF,HNF1B	GO:0050890	0.178471	0.271579	1	24	cognition	BP
GO:0016310	0.728558	0.758636	1	327	phosphorylation	BP	ENSSSCG00000010429	PRKG1	GO:0004190	0.178991	0.271579	1	37	aspartic-type endopeptidase activity	MF
GO:0042802	0.762711	0.792381	1	390	identical protein binding	MF	ENSSSCG00000015506	TNN	GO:0019933	0.179275	0.271579	1	24	cAMP-mediated signaling	BP
GO:0005829	0.770766	0.798922	2	759	cytosol	CC	ENSSSCG00000003877,ENSSSCG00000004032	FAF1,--	GO:0005201	0.181034	0.273617	1	30	extracellular matrix structural constituent	MF
GO:0005576	0.817273	0.845198	1	676	extracellular region	CC	ENSSSCG00000005485	AMBP	GO:0044822	0.186892	0.281348	7	855	poly(A) RNA binding	MF
GO:0000122	0.838135	0.864803	1	482	negative regulation of transcription from RNA polymerase II promoter	BP	ENSSSCG00000022417	HNF1B	GO:0017124	0.187453	0.281348	1	34	SH3 domain binding	MF
GO:0005730	0.854696	0.879892	1	509	nucleolus	CC	ENSSSCG00000000119	EIF3L	GO:0030141	0.188001	0.281348	1	43	secretory granule	CC
GO:0055114	0.878234	0.902077	1	655	oxidation-reduction process	BP	ENSSSCG00000023320	--	GO:0016079	0.188119	0.281348	1	40	synaptic vesicle exocytosis	BP
GO:0005622	0.894164	0.916367	2	1154	intracellular	CC	ENSSSCG00000025602,ENSSSCG00000021036	--,RAB3B	GO:0050919	0.188273	0.281348	1	38	negative chemotaxis	BP
GO:0003677	0.903086	0.923426	2	1121	DNA binding	MF	ENSSSCG00000013384,ENSSSCG00000022417	--,HNF1B	GO:0019003	0.190339	0.283793	1	40	GDP binding	MF
GO:0045944	0.924559	0.943258	1	692	positive regulation of transcription from RNA polymerase II promoter	BP	ENSSSCG00000022417	HNF1B	GO:0030425	0.191332	0.284633	2	119	dendrite	CC
GO:0003700	0.937187	0.953998	1	753	transcription factor activity, sequence-specific DNA binding	MF	ENSSSCG00000022417	HNF1B	GO:0005518	0.193163	0.286713	1	40	collagen binding	MF
GO:0004871	0.960835	0.975882	1	1508	signal transducer activity	MF	ENSSSCG00000007058	PLCB4	GO:0042803	0.194573	0.288159	4	439	protein homodimerization activity	MF
GO:0016021	0.982058	0.988691	10	5551	integral component of membrane	CC	ENSSSCG00000010433,ENSSSCG00000026383,ENSSSCG00000009641,ENSSSCG00000023320,ENSSSCG00000029688,ENSSSCG00000015590,ENSSSCG00000000082,ENSSSCG00000017238,ENSSSCG00000004190,ENSSSCG00000015607	SGMS1,NRP2,SLC25A37,--,--,FLVCR1,CACNA1I,TTYH2,STX7,HHAT	GO:0048704	0.196282	0.289967	1	42	embryonic skeletal system morphogenesis	BP
GO:0008152	0.983755	0.988691	1	1133	metabolic process	BP	ENSSSCG00000029837	--	GO:0001750	0.19667	0.289967	1	34	photoreceptor outer segment	CC
GO:0003676	0.98398	0.988691	1	1079	nucleic acid binding	MF	ENSSSCG00000008756	DHX15	GO:0001947	0.197793	0.290422	1	38	heart looping	BP
GO:0006355	0.984336	0.988691	1	1161	regulation of transcription, DNA-templated	BP	ENSSSCG00000013384	--	GO:0015631	0.197855	0.290422	1	37	tubulin binding	MF
GO:0016020	0.988095	0.990276	13	6640	membrane	CC	ENSSSCG00000010433,ENSSSCG00000026383,ENSSSCG00000015401,ENSSSCG00000000119,ENSSSCG00000009641,ENSSSCG00000023320,ENSSSCG00000015590,ENSSSCG00000027279,ENSSSCG00000000082,ENSSSCG00000021036,ENSSSCG00000017238,ENSSSCG00000004190,ENSSSCG00000015607	SGMS1,NRP2,PCLO,EIF3L,SLC25A37,--,FLVCR1,--,CACNA1I,RAB3B,TTYH2,STX7,HHAT	GO:0043130	0.198494	0.290715	1	43	ubiquitin binding	MF
GO:0046872	0.991857	0.991857	2	1742	metal ion binding	MF	ENSSSCG00000026383,ENSSSCG00000015401	NRP2,PCLO	GO:0045666	0.199352	0.291326	1	44	positive regulation of neuron differentiation	BP
									GO:0019827	0.200068	0.291729	1	40	stem cell population maintenance	BP
									GO:0048565	0.201509	0.293007	1	28	digestive tract development	BP
									GO:0005544	0.201874	0.293007	1	46	calcium-dependent phospholipid binding	MF
									GO:0000149	0.202272	0.293007	1	47	SNARE binding	MF
									GO:0007416	0.202789	0.293114	1	25	synapse assembly	BP
									GO:0042060	0.203769	0.293888	1	34	wound healing	BP
									GO:0031201	0.205447	0.295094	1	53	SNARE complex	CC
									GO:0072372	0.205496	0.295094	1	34	primary cilium	CC
									GO:0001755	0.208089	0.298171	1	46	neural crest cell migration	BP
									GO:0030176	0.209497	0.29954	1	46	integral component of endoplasmic reticulum membrane	CC
									GO:0005768	0.211509	0.301765	2	154	endosome	CC
									GO:0086010	0.212513	0.302058	1	50	membrane depolarization during action potential	BP
									GO:0051216	0.212627	0.302058	1	37	cartilage development	BP
									GO:0045773	0.21651	0.306279	1	15	positive regulation of axon extension	BP
									GO:0034613	0.216523	0.306279	1	35	cellular protein localization	BP
									GO:0006412	0.219916	0.309869	2	272	translation	BP
									GO:0016192	0.219998	0.309869	2	158	vesicle-mediated transport	BP
									GO:0021987	0.222229	0.312348	1	36	cerebral cortex development	BP
									GO:0016477	0.223131	0.312654	2	147	cell migration	BP
									GO:0050839	0.223392	0.312654	1	44	cell adhesion molecule binding	MF
									GO:0001889	0.224282	0.313237	1	33	liver development	BP
									GO:0005581	0.225783	0.31467	1	44	collagen trimer	CC
									GO:0007229	0.226389	0.31469	1	48	integrin-mediated signaling pathway	BP
									GO:0030900	0.226748	0.31469	1	43	forebrain development	BP
									GO:0010976	0.230136	0.318724	1	40	positive regulation of neuron projection development	BP
									GO:0042981	0.23113	0.319122	2	192	regulation of apoptotic process	BP
									GO:0003725	0.231443	0.319122	1	42	double-stranded RNA binding	MF
									GO:0045454	0.23187	0.319122	1	58	cell redox homeostasis	BP
									GO:0006821	0.237114	0.325662	1	48	chloride transport	BP
									GO:0005254	0.238372	0.326712	1	50	chloride channel activity	MF
									GO:0003712	0.239561	0.327211	1	45	transcription cofactor activity	MF
									GO:0032436	0.240027	0.327211	1	49	positive regulation of proteasomal ubiquitin-dependent protein catabolic process	BP
									GO:0031625	0.240292	0.327211	2	182	ubiquitin protein ligase binding	MF
									GO:0007417	0.240712	0.327211	1	42	central nervous system development	BP
									GO:0005794	0.241804	0.328021	5	568	Golgi apparatus	CC
									GO:0006302	0.242572	0.32839	1	37	double-strand break repair	BP
									GO:0009986	0.243644	0.328946	3	329	cell surface	CC
									GO:0032587	0.244109	0.328946	1	30	ruffle membrane	CC
									GO:0016525	0.244473	0.328946	1	44	negative regulation of angiogenesis	BP
									GO:0006869	0.247192	0.33193	1	55	lipid transport	BP
									GO:0043588	0.24802	0.331965	1	32	skin development	BP
									GO:1903955	0.248222	0.331965	1	52	positive regulation of protein targeting to mitochondrion	BP
									GO:0004674	0.250258	0.334014	3	291	protein serine/threonine kinase activity	MF
									GO:0071222	0.252171	0.335889	1	58	cellular response to lipopolysaccharide	BP
									GO:0005681	0.252733	0.335962	1	54	spliceosomal complex	CC
									GO:0032482	0.255122	0.338458	1	63	Rab protein signal transduction	BP
									GO:0007224	0.256496	0.339601	1	56	smoothened signaling pathway	BP
									GO:0090263	0.257483	0.339874	1	47	positive regulation of canonical Wnt signaling pathway	BP
									GO:0000776	0.25773	0.339874	1	52	kinetochore	CC
									GO:0045177	0.258283	0.339927	1	52	apical part of cell	CC
									GO:0012505	0.258983	0.340172	1	56	endomembrane system	CC
									GO:0008021	0.260051	0.340898	1	56	synaptic vesicle	CC
									GO:0019905	0.26176	0.342461	1	60	syntaxin binding	MF
									GO:0007368	0.262899	0.343272	1	43	determination of left/right symmetry	BP
									GO:0016529	0.26791	0.349016	1	21	sarcoplasmic reticulum	CC
									GO:0072562	0.268352	0.349016	1	64	blood microparticle	CC
									GO:0002020	0.282523	0.366543	1	56	protease binding	MF
									GO:0031463	0.282936	0.366543	1	58	Cul3-RING ubiquitin ligase complex	CC
									GO:0007219	0.283963	0.367156	1	64	Notch signaling pathway	BP
									GO:0008081	0.285407	0.367835	1	54	phosphoric diester hydrolase activity	MF
									GO:0007507	0.2856	0.367835	2	158	heart development	BP
									GO:0005604	0.290817	0.373827	1	44	basement membrane	CC
									GO:0004867	0.293513	0.376561	1	77	serine-type endopeptidase inhibitor activity	MF
									GO:0030336	0.300383	0.384004	1	54	negative regulation of cell migration	BP
									GO:0045766	0.300475	0.384004	1	66	positive regulation of angiogenesis	BP
									GO:0009952	0.302333	0.385301	1	75	anterior/posterior pattern specification	BP
									GO:0035264	0.302653	0.385301	1	61	multicellular organism growth	BP
									GO:0035556	0.304088	0.386385	3	334	intracellular signal transduction	BP
									GO:0008013	0.308504	0.390873	1	55	beta-catenin binding	MF
									GO:0005543	0.309301	0.390873	1	66	phospholipid binding	MF
									GO:0008565	0.309793	0.390873	1	76	protein transporter activity	MF
									GO:0001843	0.309983	0.390873	1	59	neural tube closure	BP
									GO:0032496	0.312486	0.39328	1	91	response to lipopolysaccharide	BP
									GO:0006913	0.314246	0.394745	1	68	nucleocytoplasmic transport	BP
									GO:0000226	0.317788	0.398439	1	55	microtubule cytoskeleton organization	BP
									GO:0007409	0.321276	0.40205	1	66	axonogenesis	BP
									GO:0008285	0.324071	0.404783	2	207	negative regulation of cell proliferation	BP
									GO:0000209	0.32554	0.405852	1	69	protein polyubiquitination	BP
									GO:0000922	0.327175	0.407124	1	60	spindle pole	CC
									GO:0005488	0.328251	0.407696	4	386	binding	MF
									GO:0010628	0.329314	0.40825	2	212	positive regulation of gene expression	BP
									GO:0071013	0.330482	0.408933	1	74	catalytic step 2 spliceosome	CC
									GO:0004721	0.333763	0.412222	1	81	phosphoprotein phosphatase activity	MF
									GO:0004004	0.335387	0.413159	1	71	ATP-dependent RNA helicase activity	MF
									GO:0005694	0.33577	0.413159	1	116	chromosome	CC
									GO:0006260	0.337457	0.413801	1	78	DNA replication	BP
									GO:1902476	0.337542	0.413801	1	74	chloride transmembrane transport	BP
									GO:0005856	0.341054	0.417334	2	173	cytoskeleton	CC
									GO:0015031	0.347179	0.424045	2	248	protein transport	BP
									GO:0004497	0.348923	0.42539	1	89	monooxygenase activity	MF
									GO:0007030	0.35005	0.42598	1	67	Golgi organization	BP
									GO:0000165	0.352361	0.427294	1	72	MAPK cascade	BP
									GO:0017137	0.352421	0.427294	1	70	Rab GTPase binding	MF
									GO:0043087	0.355394	0.430111	1	64	regulation of GTPase activity	BP
									GO:0016705	0.357985	0.432456	1	95	oxidoreductase activity, acting on paired donors, with incorporation or reduction of molecular oxygen	MF
									GO:0007264	0.36254	0.437161	2	242	small GTPase mediated signal transduction	BP
									GO:0004386	0.365837	0.440334	1	72	helicase activity	MF
									GO:0010951	0.366715	0.44059	1	104	negative regulation of endopeptidase activity	BP
									GO:0000784	0.369296	0.442887	1	78	nuclear chromosome, telomeric region	CC
									GO:0006396	0.372318	0.445704	1	79	RNA processing	BP
									GO:0016337	0.373928	0.446824	1	65	single organismal cell-cell adhesion	BP
									GO:0005770	0.376326	0.448879	1	74	late endosome	CC
									GO:0098779	0.378323	0.450449	1	89	mitophagy in response to mitochondrial depolarization	BP
									GO:0005244	0.379069	0.450527	1	91	voltage-gated ion channel activity	MF
									GO:0034765	0.384331	0.455963	1	92	regulation of ion transmembrane transport	BP
									GO:0005262	0.386015	0.457141	1	61	calcium channel activity	MF
									GO:0005802	0.393059	0.464652	1	82	trans-Golgi network	CC
									GO:0035335	0.400898	0.473074	1	97	peptidyl-tyrosine dephosphorylation	BP
									GO:0005929	0.40426	0.476192	1	84	cilium	CC
									GO:0004725	0.407211	0.478817	1	97	protein tyrosine phosphatase activity	MF
									GO:0007169	0.409448	0.480593	1	100	transmembrane receptor protein tyrosine kinase signaling pathway	BP
									GO:0007411	0.412405	0.483207	1	93	axon guidance	BP
									GO:0006886	0.42013	0.491389	2	276	intracellular protein transport	BP
									GO:0005125	0.426847	0.498275	1	174	cytokine activity	MF
									GO:0043066	0.42804	0.498275	2	272	negative regulation of apoptotic process	BP
									GO:0003824	0.428276	0.498275	3	486	catalytic activity	MF
									GO:0006468	0.432556	0.502	4	601	protein phosphorylation	BP
									GO:0004872	0.432994	0.502	1	112	receptor activity	MF
									GO:0016791	0.436585	0.505278	1	109	phosphatase activity	MF
									GO:0016787	0.437406	0.505345	5	811	hydrolase activity	MF
									GO:0043025	0.439151	0.506477	1	103	neuronal cell body	CC
									GO:0004842	0.441613	0.50843	2	248	ubiquitin-protein transferase activity	MF
									GO:0016055	0.444116	0.509983	1	84	Wnt signaling pathway	BP
									GO:0016567	0.444502	0.509983	2	253	protein ubiquitination	BP
									GO:0030036	0.446569	0.511469	1	105	actin cytoskeleton organization	BP
									GO:0006810	0.452032	0.516831	5	848	transport	BP
									GO:0051015	0.453435	0.517541	1	101	actin filament binding	MF
									GO:0007018	0.45642	0.520051	1	67	microtubule-based movement	BP
									GO:0015630	0.460312	0.523585	1	108	microtubule cytoskeleton	CC
									GO:0008022	0.465543	0.528627	1	98	protein C-terminus binding	MF
									GO:0005769	0.470829	0.533714	1	107	early endosome	CC
									GO:0009897	0.473746	0.536102	1	136	external side of plasma membrane	CC
									GO:0032259	0.480505	0.542823	1	103	methylation	BP
									GO:0016757	0.484481	0.546382	1	128	transferase activity, transferring glycosyl groups	MF
									GO:0007155	0.489001	0.550542	2	267	cell adhesion	BP
									GO:0005085	0.492008	0.552511	1	99	guanyl-nucleotide exchange factor activity	MF
									GO:0019904	0.492419	0.552511	1	122	protein domain specific binding	MF
									GO:0000139	0.494941	0.554401	1	126	Golgi membrane	CC
									GO:0045087	0.499759	0.558852	1	142	innate immune response	BP
									GO:0005783	0.500703	0.558916	3	514	endoplasmic reticulum	CC
									GO:0005509	0.501505	0.558916	4	613	calcium ion binding	MF
									GO:0005765	0.505691	0.562635	1	124	lysosomal membrane	CC
									GO:0034220	0.514514	0.57149	1	155	ion transmembrane transport	BP
									GO:0016311	0.517855	0.574238	1	137	dephosphorylation	BP
									GO:0031965	0.519325	0.574905	1	103	nuclear membrane	CC
									GO:0015629	0.522594	0.577558	1	129	actin cytoskeleton	CC
									GO:0006470	0.524943	0.579187	1	148	protein dephosphorylation	BP
									GO:0006508	0.526157	0.579561	3	552	proteolysis	BP
									GO:0005764	0.541011	0.594932	1	139	lysosome	CC
									GO:0000287	0.557228	0.611749	1	162	magnesium ion binding	MF
									GO:0005813	0.558687	0.612336	2	317	centrosome	CC
									GO:0005667	0.574122	0.628213	1	147	transcription factor complex	CC
									GO:0043065	0.576117	0.629356	1	147	positive regulation of apoptotic process	BP
									GO:0005743	0.582688	0.635485	1	198	mitochondrial inner membrane	CC
									GO:0006974	0.593604	0.646326	1	148	cellular response to DNA damage stimulus	BP
									GO:0005829	0.597884	0.649916	4	759	cytosol	CC
									GO:0005975	0.604616	0.656056	1	183	carbohydrate metabolic process	BP
									GO:0007275	0.605513	0.656056	1	194	multicellular organismal development	BP
									GO:0006955	0.609117	0.658882	1	257	immune response	BP
									GO:0042127	0.612017	0.660938	1	180	regulation of cell proliferation	BP
									GO:0001701	0.614288	0.661432	1	151	in utero embryonic development	BP
									GO:0006811	0.614473	0.661432	2	376	ion transport	BP
									GO:0045202	0.61992	0.666212	1	161	synapse	CC
									GO:0005874	0.621575	0.666908	1	130	microtubule	CC
									GO:0045893	0.628619	0.673375	2	373	positive regulation of transcription, DNA-templated	BP
									GO:0042802	0.632717	0.67667	2	390	identical protein binding	MF
									GO:0044212	0.642107	0.685605	1	157	transcription regulatory region DNA binding	MF
									GO:0005524	0.657546	0.700959	7	1327	ATP binding	MF
									GO:0003924	0.688168	0.732423	1	239	GTPase activity	MF
									GO:0005216	0.692685	0.736047	1	203	ion channel activity	MF
									GO:0004713	0.699853	0.742472	2	409	protein tyrosine kinase activity	MF
									GO:0005634	0.705365	0.746734	16	3342	nucleus	CC
									GO:0007165	0.706126	0.746734	7	2059	signal transduction	BP
									GO:0005576	0.717531	0.757585	2	676	extracellular region	CC
									GO:0046982	0.726361	0.765686	1	291	protein heterodimerization activity	MF
									GO:0043231	0.727749	0.76593	2	460	intracellular membrane-bounded organelle	CC
									GO:0008152	0.733609	0.770376	5	1133	metabolic process	BP
									GO:0008284	0.734301	0.770376	1	249	positive regulation of cell proliferation	BP
									GO:0043234	0.759501	0.795553	1	232	protein complex	CC
									GO:0008233	0.761743	0.796641	1	288	peptidase activity	MF
									GO:0005886	0.779322	0.812729	10	2703	plasma membrane	CC
									GO:0000166	0.779582	0.812729	6	1335	nucleotide binding	MF
									GO:0005525	0.804479	0.836241	1	343	GTP binding	MF
									GO:0004672	0.804661	0.836241	2	534	protein kinase activity	MF
									GO:0055085	0.807492	0.837356	2	551	transmembrane transport	BP
									GO:0005622	0.808263	0.837356	4	1154	intracellular	CC
									GO:0016301	0.849011	0.877056	1	314	kinase activity	MF
									GO:0016740	0.850144	0.877056	2	576	transferase activity	MF
									GO:0043547	0.851331	0.877056	1	316	positive regulation of GTPase activity	BP
									GO:0045892	0.851884	0.877056	1	339	negative regulation of transcription, DNA-templated	BP
									GO:0016310	0.857834	0.88181	1	327	phosphorylation	BP
									GO:0045944	0.899172	0.922871	2	692	positive regulation of transcription from RNA polymerase II promoter	BP
									GO:0005739	0.912697	0.935303	3	1102	mitochondrion	CC
									GO:0000122	0.933227	0.954863	1	482	negative regulation of transcription from RNA polymerase II promoter	BP
									GO:0046872	0.93574	0.95507	6	1742	metal ion binding	MF
									GO:0005654	0.936315	0.95507	4	1246	nucleoplasm	CC
									GO:0003676	0.940592	0.957957	3	1079	nucleic acid binding	MF
									GO:0005730	0.942851	0.958783	1	509	nucleolus	CC
									GO:0055114	0.952376	0.965502	1	655	oxidation-reduction process	BP
									GO:0016021	0.958193	0.969914	18	5551	integral component of membrane	CC
									GO:0008270	0.977961	0.988412	2	993	zinc ion binding	MF
									GO:0003677	0.9811	0.989316	2	1121	DNA binding	MF
									GO:0003700	0.981844	0.989316	1	753	transcription factor activity, sequence-specific DNA binding	MF
									GO:0016020	0.990822	0.9967	21	6640	membrane	CC
									GO:0004930	0.99224	0.9967	1	1492	G-protein coupled receptor activity	MF
									GO:0004871	0.993689	0.9967	1	1508	signal transducer activity	MF
									GO:0007186	0.995218	0.996724	1	1612	G-protein coupled receptor signaling pathway	BP
									GO:0006355	0.997735	0.997735	1	1161	regulation of transcription, DNA-templated	BP
