# Supplementary material for: Dynamic Changes of DNA Methylation and Transcriptome Expression in Porcine Ovaries during Aging
Source: Biomed Res Int. 2019 Oct 30;2019:8732023. doi: 10.1155/2019/8732023 (PMC6874880; doi:10.1155/2019/8732023)
Supplement: Supplementary Materials — Table S1: primer sequences for q-PCR. Table S2: summary of sequence data and read-alignment statistics. Table S3: percentage of cytosine methylation after extraction. Table S4: association analysis of regulated genes between both ovarian development stages. Table S5: overlap between different methylation regions and differentially expressed genes. Figure S1: DNA methylation levels of CpG CHG and CHH on each chromosome. Figure S2: Pearson's correlation between DNA methylation level and chromosomal features. (A) Scatter plot and trend line (Pearson's correlation), indicating the correlation between the chromosome length and methylation level. (B) Scatter plot and trend line (Pearson's correlation), indicating the correlation between the chromosome GC content and methylation level. (C) Scatter plot and trend line (Pearson's correlation), indicating the correlation between the gene number in chromosome and methylation. (D) Scatter plot and trend line (Pearson's correlation), indicating the correlation between the chromosome CGI ratio and methylation level. (E) Scatter plot and trend line (Pearson's correlation), indicating the correlation between the chromosome repeat number and methylation level. Figure S3: verification of whole genome bisulfite and RNA sequencing data. (A) DNA methylation was verified via bisulfite sequencing PCR. The expression levels of mRNAs (B), miRNAs (C), lncRNAs (D), and circRNAs (E) were verified via q-PCR and adjusted by three endogenous control genes (porcine GAPDH, ACTB, and U6 snRNA). Figure S4: DNA methylation levels and RNA expression levels on each chromosome. Supplementary Database S1: summary and function enrichment of different methylation regions. Supplementary Database S2: identified mRNAs, miRNAs, lncRNAs, and circRNAs in all samples. Supplementary Database S3: differentially expressed mRNAs, miRNAs, lncRNAs, and circRNAs between both stages. Supplementary Database S4: GO analysis of differentially expressed RNAs and function over [file 8732023.f1.zip › 8732023.f1/Supplementary Database 2.xlsx]

## Sheet: Identified mRNA 
Identified mRNA in four samples
mRNA ID	Type	YP-1	YP-2	OP-1	OP-2
ENSSSCG00000000001	protein_coding	0.065	0	0.456	1.015
ENSSSCG00000000002	protein_coding	0.065	0.264	0.138	0.285
ENSSSCG00000000003	protein_coding	2.278	0.382	3.661	3.823
ENSSSCG00000000004	protein_coding	0.057	0.091	0.064	0.152
ENSSSCG00000000005	protein_coding	1.944	3.631	2.802	2.752
ENSSSCG00000000006	protein_coding	0.659	0.737	1.04	1.149
ENSSSCG00000000007	protein_coding	1.489	0.919	1.39	2.173
ENSSSCG00000000010	protein_coding	7.467	9.627	64.67	105.055
ENSSSCG00000000011	protein_coding	0	0.027	0.032	0
ENSSSCG00000000013	protein_coding	0.089	0	0.074	0.115
ENSSSCG00000000014	protein_coding	2.635	1.465	3.81	3.29
ENSSSCG00000000015	protein_coding	1.96	0	0.265	0.482
ENSSSCG00000000016	protein_coding	0.716	0.009	0.382	0.662
ENSSSCG00000000017	protein_coding	0	0	0.085	0.037
ENSSSCG00000000018	protein_coding	10.29	1.511	6.102	6.52
ENSSSCG00000000019	protein_coding	12.852	9.764	12.947	7.991
ENSSSCG00000000020	protein_coding	0	0	0.117	0.161
ENSSSCG00000000021	protein_coding	0	0.027	0.456	0.271
ENSSSCG00000000022	protein_coding	2.579	1.292	8.712	10.467
ENSSSCG00000000023	protein_coding	0.033	0	0.732	1.838
ENSSSCG00000000024	protein_coding	3.636	1.083	4.033	2.104
ENSSSCG00000000025	protein_coding	0.83	0.773	1.528	1.245
ENSSSCG00000000026	protein_coding	0.049	0.146	0.074	0.069
ENSSSCG00000000028	protein_coding	0.073	0.036	0.106	0.418
ENSSSCG00000000029	protein_coding	0.073	0.846	0.828	1.792
ENSSSCG00000000031	protein_coding	3.123	1.056	2.621	3.088
ENSSSCG00000000033	protein_coding	1.586	0.564	20.439	12.264
ENSSSCG00000000034	protein_coding	3.441	4.595	7.959	12.636
ENSSSCG00000000035	protein_coding	0.651	0.81	0.913	4.466
ENSSSCG00000000036	protein_coding	7.573	3.239	7.641	5.767
ENSSSCG00000000037	protein_coding	5.287	4.577	3.406	5.142
ENSSSCG00000000038	protein_coding	19.481	19.792	14.836	36.452
ENSSSCG00000000039	protein_coding	9.891	11.611	11.058	10.853
ENSSSCG00000000040	protein_coding	0.187	0.3	0.117	0.207
ENSSSCG00000000041	protein_coding	0	0	0.085	0
ENSSSCG00000000042	protein_coding	12.087	3.449	5.826	8.381
ENSSSCG00000000045	protein_coding	2.131	3.749	1.974	3.318
ENSSSCG00000000046	protein_coding	0.691	0.136	0.753	1.342
ENSSSCG00000000047	protein_coding	13.185	9.191	9.01	4.894
ENSSSCG00000000050	protein_coding	1.204	2.466	3.014	5.206
ENSSSCG00000000056	protein_coding	0	0	0.021	0.009
ENSSSCG00000000058	protein_coding	24.841	21.329	18.178	19.349
ENSSSCG00000000059	protein_coding	5.889	5.232	4.68	5.013
ENSSSCG00000000060	protein_coding	9.509	1.474	2.674	2.941
ENSSSCG00000000061	protein_coding	2.871	3.876	5.932	6.654
ENSSSCG00000000062	protein_coding	9.501	4.905	11.206	15.062
ENSSSCG00000000063	protein_coding	0.602	0.71	1.602	1.884
ENSSSCG00000000064	protein_coding	10.452	4.768	11.312	12.177
ENSSSCG00000000066	protein_coding	1.513	1.665	1.9	2.173
ENSSSCG00000000067	protein_coding	0	0	0.085	0.101
ENSSSCG00000000068	protein_coding	1.131	1.975	2.483	4.338
ENSSSCG00000000071	protein_coding	34.383	36.462	35.561	33.906
ENSSSCG00000000072	protein_coding	18.269	13.012	10.909	5.684
ENSSSCG00000000073	protein_coding	0.277	0	0.202	1.089
ENSSSCG00000000074	protein_coding	0.016	0.419	0.255	0.032
ENSSSCG00000000075	protein_coding	0.236	0.091	2.43	2.564
ENSSSCG00000000076	protein_coding	1.667	1.137	4.446	2.876
ENSSSCG00000000077	protein_coding	5.002	6.888	4.606	4.218
ENSSSCG00000000078	protein_coding	1.968	1.238	2.844	3.607
ENSSSCG00000000079	protein_coding	0.35	0	0.244	0.326
ENSSSCG00000000080	protein_coding	0.098	0	0.053	0.064
ENSSSCG00000000081	protein_coding	0.016	0	0.053	0
ENSSSCG00000000082	protein_coding	0.268	0.4	1.199	1.369
ENSSSCG00000000083	protein_coding	21.531	12.221	17.117	10.311
ENSSSCG00000000084	protein_coding	32.146	42.75	86.753	40.523
ENSSSCG00000000086	protein_coding	1.163	1.865	1.252	1.149
ENSSSCG00000000087	protein_coding	4.026	2.584	9.169	9.195
ENSSSCG00000000089	protein_coding	158.435	334.674	365.923	285.021
ENSSSCG00000000090	protein_coding	2.188	0.874	7.863	8.694
ENSSSCG00000000091	protein_coding	0.797	1.001	1.963	0.698
ENSSSCG00000000092	protein_coding	0	0.009	0.032	0.074
ENSSSCG00000000093	protein_coding	0.578	1.583	1.74	3.837
ENSSSCG00000000094	protein_coding	10.9	17.417	16.746	21.743
ENSSSCG00000000095	protein_coding	2.928	3.44	5.359	5.041
ENSSSCG00000000096	protein_coding	23.825	23.04	11.981	15.026
ENSSSCG00000000097	protein_coding	28.339	42.941	22.848	17.796
ENSSSCG00000000103	protein_coding	0	0	0	0.023
ENSSSCG00000000104	protein_coding	47.202	54.052	64.977	56.311
ENSSSCG00000000105	protein_coding	6.824	7.744	4.913	4.076
ENSSSCG00000000106	protein_coding	0.041	0.064	0.159	0.253
ENSSSCG00000000107	protein_coding	5.694	10.474	8.086	11.138
ENSSSCG00000000108	protein_coding	1.179	0.318	0.976	2.881
ENSSSCG00000000110	protein_coding	1.057	0.746	1.571	1.852
ENSSSCG00000000111	protein_coding	0.138	0	0.074	0.147
ENSSSCG00000000113	protein_coding	0	0	0.064	0.129
ENSSSCG00000000114	protein_coding	2.099	1.756	2.175	2.169
ENSSSCG00000000116	protein_coding	62.909	84.999	70.665	53.44
ENSSSCG00000000117	protein_coding	0.472	0.546	0.499	1.677
ENSSSCG00000000118	protein_coding	0.594	0.027	1.019	2.15
ENSSSCG00000000119	protein_coding	31.942	46.026	30.319	36.296
ENSSSCG00000000120	protein_coding	1.131	1.492	1.921	2.178
ENSSSCG00000000121	protein_coding	0	0.091	0.127	0.202
ENSSSCG00000000124	protein_coding	3.205	2.53	2.42	3.878
ENSSSCG00000000125	protein_coding	195.933	118.741	235.799	183.087
ENSSSCG00000000130	protein_coding	1.692	1.083	1.772	0.859
ENSSSCG00000000131	protein_coding	0	0.009	0	0.096
ENSSSCG00000000133	protein_coding	8.728	2.402	8.649	4.232
ENSSSCG00000000134	protein_coding	1.066	0.619	5.009	2.394
ENSSSCG00000000135	protein_coding	1.074	3.785	1.624	1.719
ENSSSCG00000000136	protein_coding	0.545	0.264	0.403	0.4
ENSSSCG00000000137	protein_coding	4.157	2.375	5.518	1.709
ENSSSCG00000000138	protein_coding	0.285	3.713	0.117	1.071
ENSSSCG00000000139	protein_coding	3.27	7.425	6.611	9.516
ENSSSCG00000000140	protein_coding	0.024	0.036	0	0
ENSSSCG00000000141	protein_coding	20.164	36.062	33.874	30.143
ENSSSCG00000000142	protein_coding	0.878	1.21	0.923	0.974
ENSSSCG00000000144	protein_coding	23.215	11.02	12.448	11.078
ENSSSCG00000000145	protein_coding	11.615	5.614	17.032	28.172
ENSSSCG00000000146	protein_coding	8.199	21.266	34.022	65.037
ENSSSCG00000000148	protein_coding	1.749	1.456	22.752	0.85
ENSSSCG00000000150	protein_coding	0	0	0.488	0
ENSSSCG00000000151	protein_coding	0	0	0.021	0
ENSSSCG00000000152	protein_coding	7.76	6.297	19.537	12.645
ENSSSCG00000000153	protein_coding	0	0	0	0.06
ENSSSCG00000000154	protein_coding	0	0.974	0.053	0.018
ENSSSCG00000000155	protein_coding	178.144	52.441	47.542	66.489
ENSSSCG00000000156	protein_coding	3.286	4.477	7.206	2.729
ENSSSCG00000000157	protein_coding	0	0.155	0.127	0.051
ENSSSCG00000000158	protein_coding	4.026	3.904	4.797	3.239
ENSSSCG00000000159	protein_coding	0	0	0.138	0
ENSSSCG00000000160	protein_coding	0.903	0.937	1.252	1.195
ENSSSCG00000000161	protein_coding	1.635	2.502	1.74	5.137
ENSSSCG00000000162	protein_coding	0.236	0.191	0.414	0.312
ENSSSCG00000000164	protein_coding	0.431	0.519	0.753	0.832
ENSSSCG00000000165	protein_coding	2.53	1.247	3.375	0.528
ENSSSCG00000000166	protein_coding	5.474	5.815	7.651	7.095
ENSSSCG00000000167	protein_coding	0.944	1.465	1.337	1.186
ENSSSCG00000000168	protein_coding	0.138	0.109	0.011	0.023
ENSSSCG00000000169	protein_coding	2.269	2.084	1.921	1.866
ENSSSCG00000000170	protein_coding	6.629	3.012	1.464	0.965
ENSSSCG00000000171	protein_coding	4.97	5.551	9.625	8.809
ENSSSCG00000000174	protein_coding	0	0	0.414	1.47
ENSSSCG00000000175	protein_coding	2.074	2.148	4.415	3.092
ENSSSCG00000000176	protein_coding	0.748	1.483	2.674	2.486
ENSSSCG00000000179	protein_coding	0.252	0.164	0.393	2.495
ENSSSCG00000000180	protein_coding	18.464	10.747	19.473	17.594
ENSSSCG00000000181	protein_coding	2.302	10.883	5.879	4.342
ENSSSCG00000000182	protein_coding	0.822	0	1.815	0.17
ENSSSCG00000000184	protein_coding	0	0	0.011	0.018
ENSSSCG00000000185	protein_coding	8.476	9.036	6.898	6.065
ENSSSCG00000000186	protein_coding	0.773	0.446	0.552	0.951
ENSSSCG00000000188	protein_coding	0.049	0	0.064	0.161
ENSSSCG00000000189	protein_coding	2.188	2.175	4.765	3.249
ENSSSCG00000000190	protein_coding	322.581	493.835	174.26	212.403
ENSSSCG00000000191	protein_coding	0.439	0.755	0.849	1.365
ENSSSCG00000000193	protein_coding	136.303	179.944	55.437	96.187
ENSSSCG00000000194	protein_coding	55.507	10.92	7.704	6.075
ENSSSCG00000000195	protein_coding	0.35	0.291	0.096	0.064
ENSSSCG00000000197	protein_coding	0.13	2.894	1.104	1.006
ENSSSCG00000000198	protein_coding	0.016	0	0	0.028
ENSSSCG00000000199	protein_coding	1.944	4.668	2.165	2.5
ENSSSCG00000000202	protein_coding	10.347	13.258	13.286	13.054
ENSSSCG00000000203	protein_coding	0.586	1.793	0.807	1.231
ENSSSCG00000000204	protein_coding	2.18	1.438	2.78	4.039
ENSSSCG00000000205	protein_coding	0.488	0.837	0.265	0.547
ENSSSCG00000000206	protein_coding	1.269	1.083	1.273	2.109
ENSSSCG00000000209	protein_coding	0.187	0.437	0.732	1.415
ENSSSCG00000000211	protein_coding	0.041	0	0.021	0.064
ENSSSCG00000000214	protein_coding	0.862	0.983	1.507	2.638
ENSSSCG00000000215	protein_coding	1.44	2.539	2.218	3.952
ENSSSCG00000000216	protein_coding	0.74	0.218	0.096	0.032
ENSSSCG00000000217	protein_coding	0.756	3.64	1.422	1.3
ENSSSCG00000000220	protein_coding	0.187	0.546	0.711	1.153
ENSSSCG00000000223	protein_coding	0.456	0.018	0.52	0.754
ENSSSCG00000000224	protein_coding	4.799	5.041	17.404	3.993
ENSSSCG00000000228	protein_coding	0.098	0.109	0.17	0.239
ENSSSCG00000000231	protein_coding	0	0	0	0.014
ENSSSCG00000000232	protein_coding	2.302	0.719	2.345	2.104
ENSSSCG00000000233	protein_coding	0.39	0.837	1.082	0.965
ENSSSCG00000000234	protein_coding	1.968	1.338	1.931	2.564
ENSSSCG00000000235	protein_coding	0	0	0.011	0
ENSSSCG00000000236	protein_coding	0	0.036	0.042	0.142
ENSSSCG00000000239	protein_coding	0.008	0.009	0	0.009
ENSSSCG00000000240	protein_coding	0	0.009	0.011	0.032
ENSSSCG00000000241	protein_coding	0.016	0.255	0	0
ENSSSCG00000000242	protein_coding	0	0	1.114	2.008
ENSSSCG00000000243	protein_coding	2.66	6.925	2.621	3.437
ENSSSCG00000000244	protein_coding	0.578	1.137	0.467	0.519
ENSSSCG00000000245	protein_coding	0.016	0.055	0.042	0.34
ENSSSCG00000000246	protein_coding	0	0	0	0.074
ENSSSCG00000000247	protein_coding	0.024	0.073	0	0
ENSSSCG00000000248	protein_coding	0.033	0.082	0.042	0.322
ENSSSCG00000000249	protein_coding	0.016	0.464	0	0
ENSSSCG00000000250	protein_coding	0.13	0.009	0	0.023
ENSSSCG00000000251	protein_coding	0	0.018	0.011	0.005
ENSSSCG00000000252	protein_coding	1.277	1.966	2.494	15.278
ENSSSCG00000000253	protein_coding	0	0.018	0.053	3.377
ENSSSCG00000000254	protein_coding	2.709	0.328	6.441	12.889
ENSSSCG00000000256	protein_coding	6.109	9.582	9.965	14.709
ENSSSCG00000000257	protein_coding	0.521	0.328	0.658	0.45
ENSSSCG00000000258	protein_coding	1.838	1.638	1.327	2.872
ENSSSCG00000000259	protein_coding	1.489	1.629	1.242	2.141
ENSSSCG00000000260	protein_coding	0	0	0.064	0.129
ENSSSCG00000000261	protein_coding	0.374	0.291	6.304	14.065
ENSSSCG00000000262	protein_coding	4.531	2.839	5.423	5.349
ENSSSCG00000000263	protein_coding	1.253	0.91	3.184	6.663
ENSSSCG00000000264	protein_coding	4.718	4.923	5.041	3.961
ENSSSCG00000000265	protein_coding	0.146	0.519	0.287	0.404
ENSSSCG00000000266	protein_coding	42.631	37.063	29.045	20.08
ENSSSCG00000000267	protein_coding	2.945	5.505	4.839	4.673
ENSSSCG00000000268	protein_coding	0.887	2.63	1.252	1.663
ENSSSCG00000000269	protein_coding	0	0.009	0.032	0.069
ENSSSCG00000000271	protein_coding	1.171	3.895	1.146	3.373
ENSSSCG00000000272	protein_coding	6.808	7.343	11.281	11.414
ENSSSCG00000000273	protein_coding	26.826	9.009	4.436	5.992
ENSSSCG00000000274	protein_coding	12.315	23.522	15.515	19.97
ENSSSCG00000000275	protein_coding	2.025	1.329	2.101	2.638
ENSSSCG00000000276	protein_coding	4.799	5.369	5.975	5.031
ENSSSCG00000000277	protein_coding	4.775	0	4.839	7.743
ENSSSCG00000000278	protein_coding	0.691	1.501	2.324	3.226
ENSSSCG00000000279	protein_coding	0	0	0	0.018
ENSSSCG00000000282	protein_coding	11.103	16.543	6.325	15.48
ENSSSCG00000000285	protein_coding	0.114	0.255	0.34	1.792
ENSSSCG00000000288	protein_coding	26.419	70.231	37.503	61.628
ENSSSCG00000000289	protein_coding	0.041	0	0.064	0.06
ENSSSCG00000000290	protein_coding	25.712	27.117	17.648	13.528
ENSSSCG00000000292	protein_coding	0.171	0.009	0.127	0.326
ENSSSCG00000000293	protein_coding	3.628	2.284	5.126	4.627
ENSSSCG00000000295	protein_coding	1.31	1.875	5.232	1.976
ENSSSCG00000000296	protein_coding	0	0	0.149	0
ENSSSCG00000000297	protein_coding	0.838	1.802	5.656	1.342
ENSSSCG00000000298	protein_coding	0.529	0	1.104	1.696
ENSSSCG00000000299	protein_coding	0.293	0	0.212	0.115
ENSSSCG00000000300	protein_coding	0	0	0.032	0
ENSSSCG00000000304	protein_coding	0	0	0.064	0
ENSSSCG00000000312	protein_coding	0	0	0.064	0.018
ENSSSCG00000000320	protein_coding	0.073	0	0.021	0
ENSSSCG00000000323	protein_coding	0	0.064	0.021	0.009
ENSSSCG00000000324	protein_coding	0	0	0.032	0
ENSSSCG00000000326	protein_coding	0	0	0.032	0.009
ENSSSCG00000000332	protein_coding	0	0	0.021	0
ENSSSCG00000000334	protein_coding	0	0.764	0	0.018
ENSSSCG00000000351	protein_coding	0	0	0	0.014
ENSSSCG00000000353	protein_coding	0	0	0.064	0.009
ENSSSCG00000000359	protein_coding	33.561	31.748	20.746	12.526
ENSSSCG00000000361	protein_coding	371.922	226.498	204.844	113.413
ENSSSCG00000000362	protein_coding	0	1.156	0.329	0.28
ENSSSCG00000000363	protein_coding	1.082	0.846	0.838	0.974
ENSSSCG00000000364	protein_coding	9.37	14.396	13.318	14.961
ENSSSCG00000000365	protein_coding	33.171	55.116	29.289	27.34
ENSSSCG00000000366	protein_coding	4.173	6.06	5.9	5.068
ENSSSCG00000000367	protein_coding	2.579	3.731	4.415	3.897
ENSSSCG00000000368	protein_coding	6.971	1.474	3.608	2.141
ENSSSCG00000000369	protein_coding	4.335	2.885	5.402	4.448
ENSSSCG00000000370	protein_coding	0.724	0.955	0.923	1.7
ENSSSCG00000000371	protein_coding	0.049	0.255	0.096	0.239
ENSSSCG00000000372	protein_coding	0	0.264	0.446	0.528
ENSSSCG00000000373	protein_coding	2.204	8.099	2.451	2.752
ENSSSCG00000000374	protein_coding	330.666	779.407	517.441	341.324
ENSSSCG00000000376	protein_coding	4.352	1.374	2.303	2.059
ENSSSCG00000000377	protein_coding	17.732	24.805	13.838	14.281
ENSSSCG00000000379	protein_coding	2.709	2.684	2.77	4.292
ENSSSCG00000000382	protein_coding	1.871	4.168	5.423	10.196
ENSSSCG00000000383	protein_coding	3.473	4.422	4.775	5.417
ENSSSCG00000000384	protein_coding	5.946	5.405	7.641	7.297
ENSSSCG00000000385	protein_coding	0.065	0	0.244	0.331
ENSSSCG00000000386	protein_coding	0.781	0.728	1.305	1.76
ENSSSCG00000000388	protein_coding	41.313	24.15	10.262	16.992
ENSSSCG00000000393	protein_coding	2.204	3.512	3.725	3.74
ENSSSCG00000000394	protein_coding	23.312	26.134	17.924	16.983
ENSSSCG00000000396	protein_coding	8.834	7.962	72.501	5.257
ENSSSCG00000000397	protein_coding	0.016	0	0.074	0
ENSSSCG00000000398	protein_coding	0.488	1.41	0.817	1.296
ENSSSCG00000000399	protein_coding	0.903	2.948	1.486	2.086
ENSSSCG00000000400	protein_coding	0	0	0.021	0
ENSSSCG00000000401	protein_coding	0.423	2.075	0.446	0.482
ENSSSCG00000000402	protein_coding	5.425	11.384	10.4	9.369
ENSSSCG00000000403	protein_coding	1.432	1.174	1.422	2.38
ENSSSCG00000000404	protein_coding	0	0	0	0.198
ENSSSCG00000000405	protein_coding	79.169	50.421	35.412	29.27
ENSSSCG00000000406	protein_coding	3.725	6.715	7.121	9.199
ENSSSCG00000000408	protein_coding	0.643	2.766	0.244	0.372
ENSSSCG00000000411	protein_coding	1.049	1.993	1.39	1.503
ENSSSCG00000000413	protein_coding	0.016	0	0.011	0.037
ENSSSCG00000000414	protein_coding	3.457	0.382	0.531	0.625
ENSSSCG00000000415	protein_coding	0.179	0	0	0.221
ENSSSCG00000000416	protein_coding	0.919	0.391	1.443	1.199
ENSSSCG00000000417	protein_coding	1.83	2.93	3.322	3.419
ENSSSCG00000000418	protein_coding	0.146	1.647	1.337	3.276
ENSSSCG00000000419	protein_coding	5.198	1.101	0.329	0.63
ENSSSCG00000000420	protein_coding	2.619	1.565	0.34	0.175
ENSSSCG00000000423	protein_coding	3.62	3.467	6.505	8.151
ENSSSCG00000000424	protein_coding	0.041	0	0.011	0
ENSSSCG00000000426	protein_coding	1.57	2.894	1.518	3.409
ENSSSCG00000000429	protein_coding	0.008	0.009	0.17	0.23
ENSSSCG00000000430	protein_coding	23.516	33.377	33.746	26.104
ENSSSCG00000000431	protein_coding	0.48	0.564	0.987	1.231
ENSSSCG00000000433	protein_coding	17.187	8.008	11.174	9.691
ENSSSCG00000000435	protein_coding	4.571	10.883	29.597	19.639
ENSSSCG00000000436	protein_coding	1.57	0.473	1.358	0.951
ENSSSCG00000000437	protein_coding	0.203	0.355	0.276	0.312
ENSSSCG00000000438	protein_coding	0	0.1	0.021	0
ENSSSCG00000000439	protein_coding	0.073	0.227	0.297	0.648
ENSSSCG00000000441	protein_coding	0.089	0	0.127	0.133
ENSSSCG00000000442	protein_coding	0.016	0	0	0
ENSSSCG00000000443	protein_coding	0.098	1.083	0.753	1.002
ENSSSCG00000000444	protein_coding	0.138	0	0.212	0.211
ENSSSCG00000000449	protein_coding	4.75	1.774	14.082	7.936
ENSSSCG00000000451	protein_coding	0.944	0.537	0.955	1.061
ENSSSCG00000000453	protein_coding	0.626	0.701	0.934	0.937
ENSSSCG00000000455	protein_coding	0.7	1.137	2.674	2.187
ENSSSCG00000000456	protein_coding	0.447	1.137	0.287	0.464
ENSSSCG00000000457	protein_coding	1.912	1.374	3.619	1.397
ENSSSCG00000000458	protein_coding	1.716	2.593	2.345	2.371
ENSSSCG00000000460	protein_coding	112.47	45.989	42.225	23.664
ENSSSCG00000000461	protein_coding	0	0	0	0.032
ENSSSCG00000000462	protein_coding	1.676	1.547	1.199	1.158
ENSSSCG00000000464	protein_coding	0	0	0.021	0.051
ENSSSCG00000000466	protein_coding	3.465	5.078	3.046	4.655
ENSSSCG00000000468	protein_coding	0	0	0.318	0.391
ENSSSCG00000000469	protein_coding	2.53	2.557	4.149	3.12
ENSSSCG00000000471	protein_coding	0	0	0.52	0.855
ENSSSCG00000000472	protein_coding	3.514	3.558	2.78	2.973
ENSSSCG00000000473	protein_coding	7.044	0.573	2.006	2.1
ENSSSCG00000000475	protein_coding	0.651	0.91	1.157	1.562
ENSSSCG00000000476	protein_coding	0	0	0	0.294
ENSSSCG00000000477	protein_coding	0.651	1.292	1.581	1.709
ENSSSCG00000000478	protein_coding	0.773	0.928	1.475	1.089
ENSSSCG00000000481	protein_coding	0.024	0	0	0.005
ENSSSCG00000000482	protein_coding	0	0	0	0.009
ENSSSCG00000000483	protein_coding	1.017	1.265	0.944	1.268
ENSSSCG00000000484	protein_coding	0.618	0	0.594	2.5
ENSSSCG00000000486	protein_coding	1.724	2.921	2.25	3.276
ENSSSCG00000000487	protein_coding	1.936	0.819	1.549	2.008
ENSSSCG00000000488	protein_coding	3.213	1.693	3.587	3.998
ENSSSCG00000000490	protein_coding	6.345	4.031	8.15	9.034
ENSSSCG00000000491	protein_coding	0.146	0	1.528	3.157
ENSSSCG00000000492	protein_coding	7.923	3.321	3.873	2.1
ENSSSCG00000000493	protein_coding	16.732	2.166	2.695	3.648
ENSSSCG00000000496	protein_coding	14.194	20.847	15.971	14.773
ENSSSCG00000000499	protein_coding	0	0	0.011	0.041
ENSSSCG00000000500	protein_coding	1.009	1.137	0.509	0.731
ENSSSCG00000000501	protein_coding	0	0	0.138	0.473
ENSSSCG00000000502	protein_coding	10.932	9.136	8.171	6.902
ENSSSCG00000000504	protein_coding	3.376	1.028	1.486	1.604
ENSSSCG00000000508	protein_coding	1.651	1.192	1.104	2.008
ENSSSCG00000000509	protein_coding	2.595	2.539	4.266	7.076
ENSSSCG00000000510	protein_coding	2.904	1.083	1.178	0.933
ENSSSCG00000000511	protein_coding	9.639	3.822	3.842	5.156
ENSSSCG00000000512	protein_coding	1.806	2.602	1.273	2.109
ENSSSCG00000000515	protein_coding	0.008	0	0.053	0.018
ENSSSCG00000000516	protein_coding	0.049	0.009	0.531	0.652
ENSSSCG00000000517	protein_coding	0.171	0.81	0.18	1.061
ENSSSCG00000000519	protein_coding	6.011	3.895	1.411	0.887
ENSSSCG00000000520	protein_coding	1.367	1.547	1.358	1.484
ENSSSCG00000000521	protein_coding	17.936	0.955	20.81	10.141
ENSSSCG00000000522	protein_coding	19.88	30.984	19.271	25.952
ENSSSCG00000000523	protein_coding	1.277	0.946	0.732	0.942
ENSSSCG00000000524	protein_coding	1.48	0	1.921	1.53
ENSSSCG00000000527	protein_coding	0.098	0.291	0.011	0.285
ENSSSCG00000000528	protein_coding	0.911	0.519	0.361	1.025
ENSSSCG00000000529	protein_coding	1.741	1.374	1.157	1.314
ENSSSCG00000000530	protein_coding	7.695	0.864	5.306	1.149
ENSSSCG00000000531	protein_coding	0.325	0	0.17	0.326
ENSSSCG00000000534	protein_coding	1.009	1.802	1.592	2.1
ENSSSCG00000000536	protein_coding	4.579	5.842	2.833	2.987
ENSSSCG00000000539	protein_coding	0.984	1.774	1.974	1.732
ENSSSCG00000000540	protein_coding	0.171	0	0.074	0.028
ENSSSCG00000000541	protein_coding	0.447	0.2	0.18	0.404
ENSSSCG00000000543	protein_coding	7.491	2.43	3.279	6.336
ENSSSCG00000000544	protein_coding	20.059	0.528	10.241	1.245
ENSSSCG00000000545	protein_coding	1.545	1.638	1.91	1.948
ENSSSCG00000000546	protein_coding	0	0.1	0.138	0.262
ENSSSCG00000000547	protein_coding	3.148	2.284	1.401	1.604
ENSSSCG00000000548	protein_coding	0.057	0.337	0.287	0.712
ENSSSCG00000000549	protein_coding	5.718	4.286	6.993	7.756
ENSSSCG00000000550	protein_coding	0	0	0	0.009
ENSSSCG00000000551	protein_coding	3.376	0.728	0.7	0.303
ENSSSCG00000000552	protein_coding	7.573	6.188	5.953	4.747
ENSSSCG00000000553	protein_coding	3.001	1.82	2.229	2.146
ENSSSCG00000000554	protein_coding	1.448	1.256	1.549	1.374
ENSSSCG00000000555	protein_coding	2.4	3.886	2.77	3.74
ENSSSCG00000000559	protein_coding	3.49	1.893	5.752	8.179
ENSSSCG00000000560	protein_coding	21.14	6.87	7.397	5.61
ENSSSCG00000000563	protein_coding	0.618	2.12	1.963	0.391
ENSSSCG00000000566	protein_coding	4.303	1.474	9.689	8.836
ENSSSCG00000000567	protein_coding	1.944	1.747	5.582	5.293
ENSSSCG00000000570	protein_coding	1.83	2.138	1.751	1.764
ENSSSCG00000000571	protein_coding	2.522	0.237	1.263	0.694
ENSSSCG00000000572	protein_coding	2.367	1.784	1.613	2.109
ENSSSCG00000000573	protein_coding	4.441	1.82	3.046	1.287
ENSSSCG00000000574	protein_coding	5.279	1.693	3.576	2.399
ENSSSCG00000000576	protein_coding	31.495	70.121	51.617	45.178
ENSSSCG00000000577	protein_coding	0.016	0.009	0	0
ENSSSCG00000000579	protein_coding	2.912	2.32	1.401	1.277
ENSSSCG00000000580	protein_coding	1.391	1.42	0.987	1.562
ENSSSCG00000000583	protein_coding	0.992	1.256	0.807	0.901
ENSSSCG00000000584	protein_coding	0.203	0.419	0.414	0.437
ENSSSCG00000000585	protein_coding	0	0.091	0	0
ENSSSCG00000000587	protein_coding	0.756	0.955	1.114	1.19
ENSSSCG00000000588	protein_coding	1.529	1.192	1.348	1.971
ENSSSCG00000000590	protein_coding	0	0	0.032	0.018
ENSSSCG00000000591	protein_coding	0.033	0.1	0	0.005
ENSSSCG00000000593	protein_coding	0	0	0.021	0
ENSSSCG00000000594	protein_coding	0.366	1.838	1.581	2.127
ENSSSCG00000000597	protein_coding	0.179	1.019	1.242	0.813
ENSSSCG00000000598	protein_coding	0.537	0	0.011	0.129
ENSSSCG00000000599	protein_coding	1.757	3.094	1.411	1.608
ENSSSCG00000000600	protein_coding	3.481	2.311	3.544	3.143
ENSSSCG00000000601	protein_coding	0.992	0.591	0.615	0.23
ENSSSCG00000000602	protein_coding	12.795	3.203	5.953	8.51
ENSSSCG00000000603	protein_coding	0	2.166	0	0.119
ENSSSCG00000000604	protein_coding	4.596	2.493	3.279	3.538
ENSSSCG00000000605	protein_coding	0	0	0.042	0.096
ENSSSCG00000000606	protein_coding	113.389	209.008	270.691	177.306
ENSSSCG00000000607	protein_coding	1.749	8.681	3.12	5.597
ENSSSCG00000000608	protein_coding	0.748	0.883	1.157	0.602
ENSSSCG00000000610	protein_coding	0	0	0.032	0.018
ENSSSCG00000000611	protein_coding	3.319	3.567	3.544	5.192
ENSSSCG00000000612	protein_coding	2.221	2.584	1.496	2.219
ENSSSCG00000000613	protein_coding	0.667	0.237	0.159	0.179
ENSSSCG00000000614	protein_coding	0.016	0.109	0.032	0.032
ENSSSCG00000000619	protein_coding	0.773	0.919	1.189	1.075
ENSSSCG00000000620	protein_coding	20.311	19.728	11.206	10.04
ENSSSCG00000000622	protein_coding	3.27	4.841	2.366	2.849
ENSSSCG00000000623	protein_coding	0.277	0.282	1.719	0.221
ENSSSCG00000000625	protein_coding	2.318	1.938	2.122	3.341
ENSSSCG00000000628	protein_coding	0	0	0.053	0.175
ENSSSCG00000000629	protein_coding	0	0.328	0.011	0.074
ENSSSCG00000000631	protein_coding	0	0	0.021	0.046
ENSSSCG00000000633	protein_coding	11.314	19.273	25.469	26.724
ENSSSCG00000000634	protein_coding	0.114	0.055	0.106	0.078
ENSSSCG00000000635	protein_coding	1.529	2.148	2.006	3.345
ENSSSCG00000000636	protein_coding	0	0	0.042	0.078
ENSSSCG00000000637	protein_coding	0	0	0.032	0
ENSSSCG00000000638	protein_coding	0	0	0.021	0
ENSSSCG00000000639	protein_coding	0	0	0	0.028
ENSSSCG00000000640	protein_coding	0.049	0	0.064	0.014
ENSSSCG00000000641	protein_coding	0.325	3.321	0.191	0.427
ENSSSCG00000000642	protein_coding	0	0	0	0.055
ENSSSCG00000000643	protein_coding	0	0	0.127	0
ENSSSCG00000000644	protein_coding	48.943	14.787	33.693	25.162
ENSSSCG00000000645	protein_coding	20.018	11.129	14.952	11.566
ENSSSCG00000000647	protein_coding	0.529	1.556	0.817	0.593
ENSSSCG00000000648	protein_coding	2.334	1.747	1.931	1.328
ENSSSCG00000000649	protein_coding	7.272	3.376	4.977	2.945
ENSSSCG00000000650	protein_coding	0.277	0	0	0.028
ENSSSCG00000000652	protein_coding	0.277	0	0.042	0.055
ENSSSCG00000000653	protein_coding	0.195	0	0.106	0.032
ENSSSCG00000000654	protein_coding	2.725	1.884	4.531	1.135
ENSSSCG00000000655	protein_coding	0.268	0.783	0.106	0.11
ENSSSCG00000000656	protein_coding	0.578	0.373	1.114	0.611
ENSSSCG00000000657	protein_coding	13.218	16.534	13.732	9.925
ENSSSCG00000000659	protein_coding	0.146	0.027	0.021	0.005
ENSSSCG00000000660	protein_coding	259.729	132.718	167.5	102.445
ENSSSCG00000000661	protein_coding	0.293	0.61	1.73	1.889
ENSSSCG00000000662	protein_coding	22.165	14.559	14.793	8.726
ENSSSCG00000000663	protein_coding	0.277	0	0.106	0.083
ENSSSCG00000000664	protein_coding	0.211	0.391	0.074	0.207
ENSSSCG00000000665	protein_coding	2.017	2.148	4.202	5.689
ENSSSCG00000000666	protein_coding	3.359	0	0.87	2.725
ENSSSCG00000000667	protein_coding	0	0	0	0.165
ENSSSCG00000000668	protein_coding	0	0	0.021	0.299
ENSSSCG00000000672	protein_coding	0.683	0.728	1.422	1.222
ENSSSCG00000000674	protein_coding	1.188	0	9.583	2.045
ENSSSCG00000000675	protein_coding	17.521	16.962	121.189	26.821
ENSSSCG00000000679	protein_coding	0.333	0.419	0.138	3.331
ENSSSCG00000000680	protein_coding	0.163	0.282	0.127	0.202
ENSSSCG00000000681	protein_coding	1.944	2.029	9.816	8.611
ENSSSCG00000000682	protein_coding	2.839	2.548	5.359	4.021
ENSSSCG00000000683	protein_coding	1.358	16.097	1.592	3.318
ENSSSCG00000000684	protein_coding	12.323	6.679	5.773	6.925
ENSSSCG00000000685	protein_coding	103.278	75.181	47.574	50.361
ENSSSCG00000000687	protein_coding	0.968	0.473	0.212	0.124
ENSSSCG00000000688	protein_coding	0.049	0.036	0.127	0.271
ENSSSCG00000000690	protein_coding	27.591	13.777	19.611	21.638
ENSSSCG00000000691	protein_coding	10.745	4.459	8.383	5.891
ENSSSCG00000000692	protein_coding	0.155	0.009	0.117	0.119
ENSSSCG00000000693	protein_coding	0.716	1.911	1.082	2.311
ENSSSCG00000000694	protein_coding	1161.08	716.383	579.044	502.478
ENSSSCG00000000695	protein_coding	1.293	0.409	2.759	2.651
ENSSSCG00000000696	protein_coding	3.221	2.657	3.98	4.788
ENSSSCG00000000697	protein_coding	4.758	6.16	4.033	12.471
ENSSSCG00000000700	protein_coding	0.317	0.391	0.637	0.533
ENSSSCG00000000701	protein_coding	12.47	21.875	16.597	15.214
ENSSSCG00000000702	protein_coding	2.676	2.53	3.502	4.053
ENSSSCG00000000703	protein_coding	2.831	10.774	2.77	5.082
ENSSSCG00000000704	protein_coding	4.579	3.057	8.744	2.679
ENSSSCG00000000705	protein_coding	1.407	0.864	0.541	0.414
ENSSSCG00000000706	protein_coding	12.779	10.947	14.729	9.723
ENSSSCG00000000707	protein_coding	0.049	0	0.096	0.225
ENSSSCG00000000708	protein_coding	9.444	7.462	15.727	10.224
ENSSSCG00000000709	protein_coding	0.594	0.783	0.562	0.588
ENSSSCG00000000710	protein_coding	0	0	0.287	1.011
ENSSSCG00000000712	protein_coding	2.082	1.11	2.865	4.779
ENSSSCG00000000713	protein_coding	0	0.537	0.064	0.308
ENSSSCG00000000714	protein_coding	0.927	0.773	0.584	1.14
ENSSSCG00000000716	protein_coding	0.521	0.127	0.127	0.211
ENSSSCG00000000717	protein_coding	0.081	0	0	0.032
ENSSSCG00000000718	protein_coding	0	0	0.011	0.014
ENSSSCG00000000719	protein_coding	13.324	11.138	6.134	6.722
ENSSSCG00000000720	protein_coding	0.211	0.328	0.552	1.356
ENSSSCG00000000721	protein_coding	0	0	0.117	0.161
ENSSSCG00000000722	protein_coding	0.96	5.26	1.284	1.985
ENSSSCG00000000723	protein_coding	3.05	4.304	3.247	3.148
ENSSSCG00000000724	protein_coding	0	0	0.032	0
ENSSSCG00000000727	protein_coding	17.301	33.878	17.542	72.15
ENSSSCG00000000728	protein_coding	1.261	1.156	1.995	1.291
ENSSSCG00000000730	protein_coding	0.187	0.273	0.615	0.248
ENSSSCG00000000732	protein_coding	0.13	0	0.382	0.354
ENSSSCG00000000734	protein_coding	1.464	0.519	1.868	1.516
ENSSSCG00000000735	protein_coding	3.555	2.22	1.825	3.57
ENSSSCG00000000736	protein_coding	0.358	0.1	0.647	0.662
ENSSSCG00000000737	protein_coding	3.449	3.94	6.633	7.761
ENSSSCG00000000738	protein_coding	1.936	3.33	1.921	2.968
ENSSSCG00000000739	protein_coding	0.057	1.301	0.276	0.51
ENSSSCG00000000740	protein_coding	0	0	0.021	0.294
ENSSSCG00000000741	protein_coding	0.813	0.055	1.157	1.411
ENSSSCG00000000742	protein_coding	0.919	1.856	1.284	1.604
ENSSSCG00000000743	protein_coding	17.065	20.556	30.478	28.48
ENSSSCG00000000745	protein_coding	0.618	0.318	0.976	1.163
ENSSSCG00000000746	protein_coding	7.459	5.369	8.914	6.768
ENSSSCG00000000747	protein_coding	1.375	5.542	4.871	5.1
ENSSSCG00000000748	protein_coding	0.008	0.164	0.042	0.023
ENSSSCG00000000749	protein_coding	0.057	0.218	0.149	0.198
ENSSSCG00000000751	protein_coding	0.545	1.046	1.072	1.057
ENSSSCG00000000753	protein_coding	4.181	2.757	2.303	5.119
ENSSSCG00000000754	protein_coding	3.644	2.748	2.844	2.454
ENSSSCG00000000755	protein_coding	3.766	3.995	4.563	5.601
ENSSSCG00000000757	protein_coding	9.118	2.402	4.393	5.252
ENSSSCG00000000758	protein_coding	1.798	3.312	1.327	1.98
ENSSSCG00000000759	protein_coding	5.718	0	1.825	1.195
ENSSSCG00000000760	protein_coding	0	0	0.021	0.023
ENSSSCG00000000763	protein_coding	1.814	0.555	1.39	1.957
ENSSSCG00000000764	protein_coding	0.537	1.538	0.637	0.942
ENSSSCG00000000765	protein_coding	5.84	2.02	5.699	7.187
ENSSSCG00000000766	protein_coding	0.415	1.21	1.082	1.374
ENSSSCG00000000767	protein_coding	48.357	23.45	20.693	15.292
ENSSSCG00000000769	protein_coding	6.157	8.108	24.758	7.448
ENSSSCG00000000770	protein_coding	1.375	3.067	5.529	3.722
ENSSSCG00000000773	protein_coding	0.944	2.084	4.096	0.855
ENSSSCG00000000774	protein_coding	0.675	0.446	36.739	0.891
ENSSSCG00000000778	protein_coding	0.301	0	0.743	0.11
ENSSSCG00000000779	protein_coding	3.782	1.966	0.753	4.053
ENSSSCG00000000781	protein_coding	0.228	0	0.042	0.17
ENSSSCG00000000782	protein_coding	0	0	0.021	0.041
ENSSSCG00000000783	protein_coding	0.781	0.3	0.849	0.675
ENSSSCG00000000784	protein_coding	1.57	1.41	0.881	1.195
ENSSSCG00000000785	protein_coding	0.073	0	0.064	0.051
ENSSSCG00000000787	protein_coding	0.171	0	0.212	0.409
ENSSSCG00000000789	protein_coding	1.074	0.118	0.202	0.244
ENSSSCG00000000791	protein_coding	2.09	2.02	0.605	3.414
ENSSSCG00000000793	protein_coding	7.825	4.468	3.778	3.148
ENSSSCG00000000795	protein_coding	0.146	0	0.87	0.57
ENSSSCG00000000798	protein_coding	4.043	1.856	1.528	2.086
ENSSSCG00000000799	protein_coding	1.562	0.546	0.86	1.976
ENSSSCG00000000800	protein_coding	0.659	0.455	0.456	0.74
ENSSSCG00000000801	protein_coding	1.781	4.395	0.743	0.841
ENSSSCG00000000802	protein_coding	3.921	24.432	11.185	3.23
ENSSSCG00000000804	protein_coding	7.825	3.74	7.152	4.737
ENSSSCG00000000806	protein_coding	3.969	2.42	6.144	4.508
ENSSSCG00000000807	protein_coding	1.212	1.483	4.701	5.022
ENSSSCG00000000808	protein_coding	35.562	21.184	35.051	21.082
ENSSSCG00000000809	protein_coding	1.179	0.864	3.682	2.229
ENSSSCG00000000810	protein_coding	8.825	26.043	37.758	32.845
ENSSSCG00000000811	protein_coding	2.554	7.453	11.164	9.493
ENSSSCG00000000812	protein_coding	0	0	0.17	0.119
ENSSSCG00000000814	protein_coding	13.283	9.555	11.981	15.485
ENSSSCG00000000816	protein_coding	1.489	2.284	1.624	1.475
ENSSSCG00000000819	protein_coding	0.073	0.664	0.202	0.299
ENSSSCG00000000820	protein_coding	0	0	0.021	0
ENSSSCG00000000832	protein_coding	0	0.4	0	0
ENSSSCG00000000837	protein_coding	0.48	2.375	1.751	1.719
ENSSSCG00000000838	protein_coding	2.391	0.783	1.167	1.038
ENSSSCG00000000839	protein_coding	2.668	0.764	3.109	2.082
ENSSSCG00000000840	protein_coding	2.66	2.411	2.918	2.302
ENSSSCG00000000841	protein_coding	4.067	5.278	5.741	3.722
ENSSSCG00000000842	protein_coding	3.311	6.852	4.616	4.108
ENSSSCG00000000843	protein_coding	6.792	4.286	4.627	5.307
ENSSSCG00000000844	protein_coding	1.253	2.138	1.242	1.544
ENSSSCG00000000846	protein_coding	1.358	1.31	1.061	1.438
ENSSSCG00000000847	protein_coding	1.31	1.265	1.592	2.127
ENSSSCG00000000848	protein_coding	1.602	0.783	1.454	2.206
ENSSSCG00000000849	protein_coding	108.378	72.979	102.172	69.715
ENSSSCG00000000852	protein_coding	0.846	0.318	0.18	0.138
ENSSSCG00000000853	protein_coding	0.838	0	0.658	1.117
ENSSSCG00000000854	protein_coding	0.504	0.109	0.096	0.096
ENSSSCG00000000856	protein_coding	0.041	0.018	0.233	0.014
ENSSSCG00000000857	protein_coding	5.8	13.067	6.94	19.538
ENSSSCG00000000858	protein_coding	0.236	3.494	0.074	0.303
ENSSSCG00000000859	protein_coding	0.651	2.248	0.371	0.551
ENSSSCG00000000860	protein_coding	0.431	2.211	0.891	0.841
ENSSSCG00000000862	protein_coding	4.571	3.449	2.229	2.674
ENSSSCG00000000863	protein_coding	1.074	1.975	1.273	1.369
ENSSSCG00000000864	protein_coding	11.469	10.628	6.091	6.079
ENSSSCG00000000866	protein_coding	0.065	0.391	0.138	0.17
ENSSSCG00000000867	protein_coding	0	1.156	0.138	0.092
ENSSSCG00000000869	protein_coding	0.878	0.992	1.029	1.512
ENSSSCG00000000870	protein_coding	5.23	5.96	4.659	5.077
ENSSSCG00000000871	protein_coding	0	0.055	0.011	0.005
ENSSSCG00000000873	protein_coding	1.643	6.151	11.387	18.89
ENSSSCG00000000874	protein_coding	0.504	0.992	0.584	1.181
ENSSSCG00000000875	protein_coding	5.019	0.601	2.918	1.112
ENSSSCG00000000876	protein_coding	0.268	0	0.52	0.092
ENSSSCG00000000877	protein_coding	3.278	1.865	1.73	1.898
ENSSSCG00000000878	protein_coding	0	0	0	0.023
ENSSSCG00000000879	protein_coding	2.863	1.01	0.096	1.53
ENSSSCG00000000880	protein_coding	0.057	0.555	0.064	0.018
ENSSSCG00000000881	protein_coding	0	0	0.127	0.152
ENSSSCG00000000882	protein_coding	0	0	0.074	0.046
ENSSSCG00000000884	protein_coding	1.106	1.092	2.292	1.061
ENSSSCG00000000886	protein_coding	93.615	61.996	33.683	24.781
ENSSSCG00000000887	protein_coding	2.139	5.878	3.629	6.052
ENSSSCG00000000890	protein_coding	2.066	3.949	1.528	1.833
ENSSSCG00000000891	protein_coding	4.352	6.961	7.779	6.686
ENSSSCG00000000892	protein_coding	0	0	0.032	0.032
ENSSSCG00000000893	protein_coding	2.522	1.465	1.273	1.627
ENSSSCG00000000894	protein_coding	0.325	0.346	0.106	0.331
ENSSSCG00000000895	protein_coding	7.402	12.703	7.259	15.122
ENSSSCG00000000896	protein_coding	2.343	0.91	1.348	0.983
ENSSSCG00000000897	protein_coding	0	0	0.021	0
ENSSSCG00000000900	protein_coding	4.034	4.24	3.311	3.088
ENSSSCG00000000901	protein_coding	1	1.438	1.093	1.277
ENSSSCG00000000902	protein_coding	1.798	1.829	1.422	1.47
ENSSSCG00000000905	protein_coding	25.769	25.697	25.67	24.505
ENSSSCG00000000906	protein_coding	0.317	0.2	1.655	0.979
ENSSSCG00000000907	protein_coding	1.066	4.623	4.903	2.155
ENSSSCG00000000908	protein_coding	16.227	17.034	12.172	10.357
ENSSSCG00000000910	protein_coding	0.927	1.62	0.849	0.588
ENSSSCG00000000911	protein_coding	6.149	3.804	3.905	5.932
ENSSSCG00000000912	protein_coding	4.189	1.665	4.415	5.243
ENSSSCG00000000914	protein_coding	7.988	9.309	14.326	8.744
ENSSSCG00000000915	protein_coding	55.596	121.816	160.857	137.151
ENSSSCG00000000916	protein_coding	1.716	0.473	0.393	1.484
ENSSSCG00000000917	protein_coding	0	0	0.011	0.096
ENSSSCG00000000918	protein_coding	26.859	0.3	0.053	0.156
ENSSSCG00000000919	protein_coding	0	0	0.011	0.005
ENSSSCG00000000920	protein_coding	1.188	0.473	1.475	1.613
ENSSSCG00000000921	protein_coding	1.245	0.983	0.605	1.038
ENSSSCG00000000922	protein_coding	5.214	3.594	0.562	1.617
ENSSSCG00000000924	protein_coding	0.155	0	0.074	0.101
ENSSSCG00000000925	protein_coding	1.879	1.283	0.764	1.13
ENSSSCG00000000926	protein_coding	0.691	0.701	0.934	1.764
ENSSSCG00000000927	protein_coding	4.539	3.34	2.526	3.529
ENSSSCG00000000931	protein_coding	0.285	1.847	0.17	0.427
ENSSSCG00000000932	protein_coding	0.155	0	0.297	0.354
ENSSSCG00000000933	protein_coding	0	0	0.191	0.234
ENSSSCG00000000934	protein_coding	0.073	0	0.042	0.694
ENSSSCG00000000936	protein_coding	0.041	0	0.074	0.037
ENSSSCG00000000937	protein_coding	0	0	0.021	0.023
ENSSSCG00000000938	protein_coding	0.521	0.446	1.39	0.207
ENSSSCG00000000939	protein_coding	1.594	3.158	5.295	2.729
ENSSSCG00000000940	protein_coding	0.008	0.318	0.276	0.064
ENSSSCG00000000941	protein_coding	0.87	1.165	1.422	1.636
ENSSSCG00000000942	protein_coding	6.19	9.518	7.428	7.559
ENSSSCG00000000943	protein_coding	0	0	0.021	0.037
ENSSSCG00000000948	protein_coding	0.415	0.2	0.096	0.051
ENSSSCG00000000950	protein_coding	0.008	0.118	0.085	0.57
ENSSSCG00000000951	protein_coding	3.66	12.312	11.822	10.922
ENSSSCG00000000952	protein_coding	0.675	1.401	1.295	1.264
ENSSSCG00000000953	protein_coding	0.553	0.136	0.255	0.565
ENSSSCG00000000955	protein_coding	5.556	3.558	8.532	5.895
ENSSSCG00000000958	protein_coding	3.888	4.231	4.744	5.753
ENSSSCG00000000959	protein_coding	7.841	11.566	15.037	6.157
ENSSSCG00000000961	protein_coding	0	0.018	0.021	0
ENSSSCG00000000964	protein_coding	2.57	1.356	9.222	13.335
ENSSSCG00000000965	protein_coding	1.399	1.574	3.937	3.883
ENSSSCG00000000966	protein_coding	2.505	0.837	4.001	3.005
ENSSSCG00000000967	protein_coding	0	0	0.096	5.872
ENSSSCG00000000968	protein_coding	1.253	1.001	5.295	5.684
ENSSSCG00000000970	protein_coding	1.773	0.773	8.978	9.93
ENSSSCG00000000971	protein_coding	1.277	0.701	2.515	2.261
ENSSSCG00000000972	protein_coding	0.781	0.719	2.95	2.564
ENSSSCG00000000973	protein_coding	0.667	0.291	3.247	3.419
ENSSSCG00000000974	protein_coding	1.245	0.309	3.767	3.584
ENSSSCG00000000975	protein_coding	0.268	0.182	0.594	0.441
ENSSSCG00000000976	protein_coding	0.008	0	0.053	0.028
ENSSSCG00000000978	protein_coding	0	0	0.011	0
ENSSSCG00000000980	protein_coding	0.39	0.273	2.112	2.017
ENSSSCG00000000981	protein_coding	1.968	2.148	12.841	7.127
ENSSSCG00000000982	protein_coding	0	0.146	0.011	0.253
ENSSSCG00000000983	protein_coding	0	0	0	0.06
ENSSSCG00000000985	protein_coding	3.595	2.229	7.768	6.833
ENSSSCG00000000990	protein_coding	0.618	0.764	0.669	0.496
ENSSSCG00000000992	protein_coding	0.024	0	0.17	0.078
ENSSSCG00000000994	protein_coding	2.692	7.198	5.317	4.972
ENSSSCG00000000997	protein_coding	0	0	0.138	0.124
ENSSSCG00000000998	protein_coding	0.683	1.838	1.082	1.397
ENSSSCG00000000999	protein_coding	0.838	1.301	1.592	1.424
ENSSSCG00000001000	protein_coding	11.323	6.861	11.111	7.926
ENSSSCG00000001001	protein_coding	0.033	0	0.17	0.147
ENSSSCG00000001002	protein_coding	4.693	2.157	6.42	9.089
ENSSSCG00000001004	protein_coding	0.138	0.446	0.881	0.767
ENSSSCG00000001005	protein_coding	4.36	16.079	47.011	41.29
ENSSSCG00000001006	protein_coding	1.448	1.756	12.151	11.354
ENSSSCG00000001008	protein_coding	7.801	7.17	6.134	7.706
ENSSSCG00000001009	protein_coding	3.132	13.749	8.341	6.856
ENSSSCG00000001010	protein_coding	3.424	2.757	16.597	13.495
ENSSSCG00000001011	protein_coding	8.59	1.938	16.682	3.731
ENSSSCG00000001016	protein_coding	4.807	2.43	18.964	4.411
ENSSSCG00000001021	protein_coding	8.459	10.783	7.789	6.879
ENSSSCG00000001022	protein_coding	14.088	14.641	19.303	16.781
ENSSSCG00000001024	protein_coding	1.562	0.783	2.356	3.157
ENSSSCG00000001025	protein_coding	0.252	0.127	0.308	1.319
ENSSSCG00000001026	protein_coding	0.952	0	1.464	3.704
ENSSSCG00000001027	protein_coding	2.888	6.506	6.696	8.648
ENSSSCG00000001030	protein_coding	0.968	2.02	1.008	0.735
ENSSSCG00000001032	protein_coding	0	0.491	0	0.404
ENSSSCG00000001033	protein_coding	0.634	0.719	0.637	0.63
ENSSSCG00000001035	protein_coding	0	1.347	0	0.018
ENSSSCG00000001036	protein_coding	0.081	0.282	0.064	0.051
ENSSSCG00000001038	protein_coding	36.034	18.399	12.427	12.099
ENSSSCG00000001039	protein_coding	1.456	2.757	1.953	2.587
ENSSSCG00000001040	protein_coding	0	2.93	0.361	0.446
ENSSSCG00000001041	protein_coding	1.936	2.966	3.47	3.543
ENSSSCG00000001042	protein_coding	0.179	0.928	1.613	1.861
ENSSSCG00000001045	protein_coding	0.024	1.756	0.615	0.524
ENSSSCG00000001046	protein_coding	1.31	0.537	0.987	1.447
ENSSSCG00000001047	protein_coding	20.758	0.164	6.155	9.801
ENSSSCG00000001049	protein_coding	0.252	0.519	0.732	0.818
ENSSSCG00000001050	protein_coding	0.407	0.364	1.04	1.048
ENSSSCG00000001052	protein_coding	0.716	0.246	1.464	0.781
ENSSSCG00000001053	protein_coding	1.188	2.002	1.783	1.907
ENSSSCG00000001054	protein_coding	0.187	0	1.178	0.652
ENSSSCG00000001056	protein_coding	3.538	5.287	4.34	5.468
ENSSSCG00000001057	protein_coding	0.496	0.646	0.764	1.144
ENSSSCG00000001058	protein_coding	0.317	0	0.138	0.708
ENSSSCG00000001061	protein_coding	0.984	0.819	1.953	2.192
ENSSSCG00000001062	protein_coding	2.351	2.966	3.046	2.766
ENSSSCG00000001063	protein_coding	1.448	2.775	3.513	3.465
ENSSSCG00000001064	protein_coding	0.7	1.884	7.704	1.043
ENSSSCG00000001065	protein_coding	0.333	0.755	1.698	2.435
ENSSSCG00000001066	protein_coding	0.325	0.419	0.541	0.584
ENSSSCG00000001067	protein_coding	0	0	0	0.482
ENSSSCG00000001068	protein_coding	1.448	1.037	1.73	2.27
ENSSSCG00000001070	protein_coding	2.595	1.838	1.528	1.751
ENSSSCG00000001071	protein_coding	3.164	2.384	5.242	3.841
ENSSSCG00000001073	protein_coding	0.708	0.055	0.424	0.501
ENSSSCG00000001074	protein_coding	1.049	0.892	1.04	0.919
ENSSSCG00000001075	protein_coding	21.246	36.089	37.651	29.164
ENSSSCG00000001076	protein_coding	0.423	0.209	0.424	0.496
ENSSSCG00000001078	protein_coding	0.797	0.601	1.082	1.227
ENSSSCG00000001079	protein_coding	0.521	0.337	0.594	0.45
ENSSSCG00000001080	protein_coding	3.075	3.394	2.483	2.78
ENSSSCG00000001081	protein_coding	2.456	7.034	7.471	9.24
ENSSSCG00000001082	protein_coding	0	0.537	0.297	0.455
ENSSSCG00000001083	protein_coding	0	0.191	0.35	0.395
ENSSSCG00000001085	protein_coding	0.024	0.127	0.265	1.328
ENSSSCG00000001087	protein_coding	1.798	2.475	0.998	0.919
ENSSSCG00000001088	protein_coding	117	3.522	76.184	35.078
ENSSSCG00000001089	protein_coding	0.211	1.501	0.138	0.129
ENSSSCG00000001090	protein_coding	4.091	1.374	2.812	1.36
ENSSSCG00000001091	protein_coding	0.187	0.264	0.096	0.248
ENSSSCG00000001092	protein_coding	1.667	1.183	1.443	1.65
ENSSSCG00000001093	protein_coding	39.084	38	31.624	37.132
ENSSSCG00000001094	protein_coding	5.059	4.932	4.446	4.779
ENSSSCG00000001095	protein_coding	3.856	4.322	3.491	3.331
ENSSSCG00000001096	protein_coding	0	0.646	0	0.074
ENSSSCG00000001097	protein_coding	0.732	1.929	3.099	1.912
ENSSSCG00000001099	protein_coding	1.505	0.573	0.753	0.988
ENSSSCG00000001100	protein_coding	2.09	1.565	5.635	2.826
ENSSSCG00000001101	protein_coding	0	0	0	0.239
ENSSSCG00000001102	protein_coding	0.805	11.93	3.449	4.209
ENSSSCG00000001106	protein_coding	0	0	0.053	0.018
ENSSSCG00000001107	protein_coding	0.041	0	0.106	0.055
ENSSSCG00000001131	protein_coding	0.537	0.764	0.562	0.781
ENSSSCG00000001132	protein_coding	0.008	0	0.011	0.074
ENSSSCG00000001134	protein_coding	46.275	291.815	112.593	144.875
ENSSSCG00000001137	protein_coding	160.436	583.211	150.648	109.429
ENSSSCG00000001147	protein_coding	0	0.282	0.021	0
ENSSSCG00000001156	protein_coding	3.368	3.094	2.664	2.826
ENSSSCG00000001164	protein_coding	0.26	1.41	0.361	1.048
ENSSSCG00000001177	protein_coding	17.757	203.358	408.308	448.189
ENSSSCG00000001182	protein_coding	0.179	0	0.021	0.009
ENSSSCG00000001196	protein_coding	0	0.337	0.011	0.018
ENSSSCG00000001197	protein_coding	0.171	0.273	0.117	0.285
ENSSSCG00000001198	protein_coding	0.195	0	0.488	0.046
ENSSSCG00000001201	protein_coding	1.375	1.056	2.08	3.088
ENSSSCG00000001202	protein_coding	1.131	2.648	1.804	1.953
ENSSSCG00000001203	protein_coding	0.26	2.657	0.69	0.914
ENSSSCG00000001204	protein_coding	0.415	0.91	0.403	0.515
ENSSSCG00000001205	protein_coding	0.382	0.3	0.329	0.547
ENSSSCG00000001206	protein_coding	2.066	4.031	3.704	3.589
ENSSSCG00000001207	protein_coding	3.847	8.626	2.706	2.458
ENSSSCG00000001209	protein_coding	0.887	1.329	1.263	1.397
ENSSSCG00000001212	protein_coding	0	0	0	0.928
ENSSSCG00000001213	protein_coding	0	0	0	3.23
ENSSSCG00000001216	protein_coding	0	0	2.006	3.749
ENSSSCG00000001219	protein_coding	2.847	4.004	4.181	5.546
ENSSSCG00000001220	protein_coding	0.106	0	0.032	0.106
ENSSSCG00000001229	protein_coding	104.1	26.525	505.174	84.446
ENSSSCG00000001231	protein_coding	86.774	44.078	126.293	48.482
ENSSSCG00000001232	protein_coding	0	0.282	0.127	0.009
ENSSSCG00000001233	protein_coding	1.261	1.192	12.904	1.778
ENSSSCG00000001234	protein_coding	0	0	0.032	0.005
ENSSSCG00000001235	protein_coding	0.033	0.082	0.042	0.023
ENSSSCG00000001236	protein_coding	0.033	0.318	0.138	0.133
ENSSSCG00000001239	protein_coding	3.579	5.26	0	2.422
ENSSSCG00000001242	protein_coding	1.228	1.793	1.974	2.697
ENSSSCG00000001244	protein_coding	0	0	0.106	0.717
ENSSSCG00000001245	protein_coding	6.052	12.876	9.423	6.722
ENSSSCG00000001247	protein_coding	0	0	0.021	0
ENSSSCG00000001252	protein_coding	1.123	4.45	10.803	2.752
ENSSSCG00000001254	protein_coding	0.081	0	0	0
ENSSSCG00000001255	protein_coding	0.098	0.728	0	0.018
ENSSSCG00000001258	protein_coding	0	0	0.032	0
ENSSSCG00000001268	protein_coding	0	0	0.021	0
ENSSSCG00000001279	protein_coding	0.252	0	0.021	0
ENSSSCG00000001294	protein_coding	0	0.655	0	0.014
ENSSSCG00000001297	protein_coding	0	0	0	0.078
ENSSSCG00000001304	protein_coding	0	0.018	0	0
ENSSSCG00000001337	protein_coding	0	0	0.021	0.009
ENSSSCG00000001340	protein_coding	0	0	0.032	0
ENSSSCG00000001341	protein_coding	55.255	40.484	336.931	28.13
ENSSSCG00000001342	protein_coding	1.082	1.219	2.144	1.787
ENSSSCG00000001344	protein_coding	0.594	0.155	2.292	1.654
ENSSSCG00000001346	protein_coding	7.459	3.34	6.898	5.684
ENSSSCG00000001347	protein_coding	3.929	11.174	5.508	6.382
ENSSSCG00000001362	protein_coding	0.732	1.456	1.464	2.66
ENSSSCG00000001370	protein_coding	6.296	3.977	3.003	3.161
ENSSSCG00000001372	protein_coding	4.002	2.448	3.311	5.523
ENSSSCG00000001373	protein_coding	11.965	5.141	8.628	4.774
ENSSSCG00000001376	protein_coding	1.375	2.475	3.364	3.662
ENSSSCG00000001377	protein_coding	9.248	5.26	9.328	6.736
ENSSSCG00000001379	protein_coding	37.466	99.176	47.054	76.989
ENSSSCG00000001382	protein_coding	4.612	5.933	13.127	13.211
ENSSSCG00000001383	protein_coding	3.782	4.213	2.791	3.023
ENSSSCG00000001384	protein_coding	2.082	1.683	1.051	1.764
ENSSSCG00000001390	protein_coding	0.033	0.009	0.191	0.469
ENSSSCG00000001391	protein_coding	1.057	3.658	3.651	3.529
ENSSSCG00000001392	protein_coding	0.277	1.456	0.785	1.015
ENSSSCG00000001393	protein_coding	0.098	1.028	0.191	0.032
ENSSSCG00000001394	protein_coding	2.627	4.987	39.286	5.583
ENSSSCG00000001398	protein_coding	3.229	5.351	4.319	4.296
ENSSSCG00000001400	protein_coding	16.179	25.961	21.977	28.121
ENSSSCG00000001401	protein_coding	0.659	3.112	0.064	1.052
ENSSSCG00000001402	protein_coding	3.156	4.541	11.387	11.382
ENSSSCG00000001403	protein_coding	0	0	0.064	0.092
ENSSSCG00000001404	protein_coding	0.146	0.009	0.159	0.032
ENSSSCG00000001405	protein_coding	3.847	5.396	3.597	5.491
ENSSSCG00000001408	protein_coding	11.16	15.633	16.99	6.75
ENSSSCG00000001409	protein_coding	3.254	3.467	5.242	10.876
ENSSSCG00000001410	protein_coding	8.004	10.192	14.56	11.832
ENSSSCG00000001411	protein_coding	1.594	0.382	0.679	1.42
ENSSSCG00000001412	protein_coding	2.709	3.13	3.438	2.867
ENSSSCG00000001413	protein_coding	6.019	9.345	9.54	6.589
ENSSSCG00000001414	protein_coding	14.893	19.2	12.214	15.614
ENSSSCG00000001416	protein_coding	0.545	0.591	0.52	1.397
ENSSSCG00000001417	protein_coding	52.432	28.818	39.742	26.476
ENSSSCG00000001418	protein_coding	16.894	3.694	4.988	6.667
ENSSSCG00000001419	protein_coding	0.805	1.838	0.064	2.794
ENSSSCG00000001420	protein_coding	2.497	2.539	6.091	6.984
ENSSSCG00000001421	protein_coding	0.805	0.728	1.273	1.3
ENSSSCG00000001422	protein_coding	1.912	1.738	7.906	1.962
ENSSSCG00000001423	protein_coding	12.787	19.491	18.433	14.313
ENSSSCG00000001424	protein_coding	2.652	2.43	3.799	5.376
ENSSSCG00000001425	protein_coding	1.814	4.113	3.98	2.941
ENSSSCG00000001426	protein_coding	11.859	4.714	15.897	24.009
ENSSSCG00000001427	protein_coding	22.523	10.319	55.586	23.002
ENSSSCG00000001428	protein_coding	0.529	0.346	0.138	0.101
ENSSSCG00000001429	protein_coding	0.594	0.318	0.435	1.172
ENSSSCG00000001430	protein_coding	11.925	14.841	23.251	24.353
ENSSSCG00000001431	protein_coding	1.44	2.475	0.86	1.277
ENSSSCG00000001433	protein_coding	23.865	11.411	9.243	6.92
ENSSSCG00000001434	protein_coding	0.22	0	1.167	3.391
ENSSSCG00000001435	protein_coding	2.888	2.794	1.793	3.285
ENSSSCG00000001436	protein_coding	20.417	20.165	8.978	8.758
ENSSSCG00000001437	protein_coding	0.073	0.692	0.244	0.299
ENSSSCG00000001438	protein_coding	30.584	29.383	30.807	26.789
ENSSSCG00000001439	protein_coding	2.757	0.883	0.828	0.749
ENSSSCG00000001440	protein_coding	1.253	0.965	0.902	1.066
ENSSSCG00000001441	protein_coding	0	0	0.096	0
ENSSSCG00000001443	protein_coding	0	0	0.011	0
ENSSSCG00000001444	protein_coding	0	0.291	0	0
ENSSSCG00000001447	protein_coding	1.245	2.057	1.624	1.934
ENSSSCG00000001453	protein_coding	105.995	41.749	83.325	27.846
ENSSSCG00000001455	protein_coding	59.306	45.407	73.478	59.036
ENSSSCG00000001456	protein_coding	72.279	41.039	38.246	20.567
ENSSSCG00000001457	protein_coding	78.648	21.402	96.813	46.414
ENSSSCG00000001458	protein_coding	0	0	0.032	0.014
ENSSSCG00000001459	protein_coding	0.887	0	0.106	0.198
ENSSSCG00000001463	protein_coding	3.018	0	6.654	1.466
ENSSSCG00000001465	protein_coding	0	0.482	1.454	0.257
ENSSSCG00000001468	protein_coding	1.253	3.44	11.631	1.778
ENSSSCG00000001469	protein_coding	11.672	4.477	22.582	5.624
ENSSSCG00000001470	protein_coding	4.441	1.784	5.147	2.904
ENSSSCG00000001471	protein_coding	14.649	16.534	16.862	20.264
ENSSSCG00000001472	protein_coding	1.684	0.355	0.796	0.294
ENSSSCG00000001473	protein_coding	0.073	0	0.053	0
ENSSSCG00000001474	protein_coding	7.158	6.06	8.267	5.114
ENSSSCG00000001475	protein_coding	4.669	7.498	7.535	6.539
ENSSSCG00000001476	protein_coding	21.254	13.295	4.308	8.129
ENSSSCG00000001477	protein_coding	4.913	10.692	5.985	7.802
ENSSSCG00000001478	protein_coding	0	0	0.042	0.037
ENSSSCG00000001479	protein_coding	0.488	0.373	0.287	0.4
ENSSSCG00000001480	protein_coding	0	0	0.011	0
ENSSSCG00000001481	protein_coding	0	0	0.021	0
ENSSSCG00000001483	protein_coding	0.089	0.045	0.191	0.147
ENSSSCG00000001484	protein_coding	0	0.146	0.021	0
ENSSSCG00000001485	protein_coding	0.838	1.292	1.008	0.79
ENSSSCG00000001486	protein_coding	2.595	2.248	1.284	1.401
ENSSSCG00000001487	protein_coding	0.211	0.582	0.064	1.227
ENSSSCG00000001488	protein_coding	17.415	33.705	8.766	24.496
ENSSSCG00000001490	protein_coding	0.033	0.673	0.042	0
ENSSSCG00000001493	protein_coding	2.66	4.14	1.825	1.186
ENSSSCG00000001494	protein_coding	7.63	2.057	1.878	2.729
ENSSSCG00000001497	protein_coding	0.911	1.602	2.112	2.44
ENSSSCG00000001498	protein_coding	2.351	3.312	2.504	1.866
ENSSSCG00000001499	protein_coding	3.465	2.202	7.874	8.22
ENSSSCG00000001500	protein_coding	0.675	0	0.053	0.248
ENSSSCG00000001501	protein_coding	5.417	3.758	5.03	5.385
ENSSSCG00000001502	protein_coding	412.161	775.84	749.229	682.606
ENSSSCG00000001503	protein_coding	4.612	2.848	3.481	3.612
ENSSSCG00000001504	protein_coding	3.978	4.341	4.913	4.351
ENSSSCG00000001505	protein_coding	18.098	24.432	17.796	17.493
ENSSSCG00000001506	protein_coding	11.754	7.607	8.649	10.398
ENSSSCG00000001507	protein_coding	2.253	1.975	7.365	6.897
ENSSSCG00000001508	protein_coding	1.773	2.53	3.502	3.01
ENSSSCG00000001509	protein_coding	3.546	2.83	21.977	4.99
ENSSSCG00000001510	protein_coding	0.423	1.165	2.027	2.339
ENSSSCG00000001511	protein_coding	4.832	4.377	7.344	7.43
ENSSSCG00000001512	protein_coding	24.703	10.455	11.312	10.192
ENSSSCG00000001513	protein_coding	0.277	0.355	0.764	1.038
ENSSSCG00000001515	protein_coding	2.456	2.366	3.173	3.414
ENSSSCG00000001516	protein_coding	2.196	2.166	6.229	2.449
ENSSSCG00000001517	protein_coding	2.131	1.456	2.292	2.422
ENSSSCG00000001518	protein_coding	0.545	0.555	1.104	1.691
ENSSSCG00000001520	protein_coding	3.164	2.339	10.633	7.334
ENSSSCG00000001521	protein_coding	0	0	0.085	0
ENSSSCG00000001523	protein_coding	0	0	0.011	0.009
ENSSSCG00000001526	protein_coding	1.245	0.819	1.39	0.758
ENSSSCG00000001527	protein_coding	22.483	16.425	32.812	18.798
ENSSSCG00000001528	protein_coding	162.69	364.684	323.889	188.766
ENSSSCG00000001531	protein_coding	16.016	28.327	19.961	12.829
ENSSSCG00000001532	protein_coding	0.512	0.373	0.87	0.68
ENSSSCG00000001533	protein_coding	6.515	8.736	5.444	4.057
ENSSSCG00000001534	protein_coding	1.57	0.946	4.86	4.379
ENSSSCG00000001535	protein_coding	0.26	1.347	0.456	0.129
ENSSSCG00000001536	protein_coding	0.236	0.682	0.509	0.492
ENSSSCG00000001537	protein_coding	1.635	1.456	3.375	4.673
ENSSSCG00000001538	protein_coding	1.269	0.901	2.388	1.581
ENSSSCG00000001539	protein_coding	1.643	1.847	2.483	3.455
ENSSSCG00000001543	protein_coding	528.292	1082.09	919.541	694.484
ENSSSCG00000001544	protein_coding	0.545	1.001	1.836	2.527
ENSSSCG00000001546	protein_coding	1.204	1.438	3.29	2.991
ENSSSCG00000001549	protein_coding	4.181	4.886	15.005	11.694
ENSSSCG00000001550	protein_coding	1.204	0.355	0.796	0.308
ENSSSCG00000001552	protein_coding	0	0	0.053	0.032
ENSSSCG00000001553	protein_coding	0	0.309	0	0
ENSSSCG00000001554	protein_coding	3.888	5.833	4.86	5.785
ENSSSCG00000001555	protein_coding	0.016	0	0.011	0.009
ENSSSCG00000001556	protein_coding	10.566	3.531	6.463	4.122
ENSSSCG00000001559	protein_coding	0	0.209	0.138	0
ENSSSCG00000001560	protein_coding	0.187	0.191	0.064	0.124
ENSSSCG00000001561	protein_coding	1.106	0.182	50.121	0.657
ENSSSCG00000001562	protein_coding	2.888	4.295	3.173	3.478
ENSSSCG00000001563	protein_coding	1.367	1.556	1.698	2.633
ENSSSCG00000001564	protein_coding	8.834	14.623	9.859	13.339
ENSSSCG00000001565	protein_coding	0	0	0.902	0
ENSSSCG00000001566	protein_coding	0.171	0.064	0.032	0.023
ENSSSCG00000001567	protein_coding	0.041	0.009	0.074	0.115
ENSSSCG00000001569	protein_coding	16.016	8.363	7.227	5.385
ENSSSCG00000001570	protein_coding	4.921	3.831	3.258	5.762
ENSSSCG00000001571	protein_coding	24.069	17.453	15.695	17.838
ENSSSCG00000001572	protein_coding	2.505	1.147	2.345	1.645
ENSSSCG00000001573	protein_coding	1.31	3.467	5.571	3.901
ENSSSCG00000001574	protein_coding	0	0	0.042	0
ENSSSCG00000001577	protein_coding	0.268	0.764	1.082	0.836
ENSSSCG00000001578	protein_coding	2.042	6.715	2.345	3.391
ENSSSCG00000001579	protein_coding	4.441	7.298	14.719	4.08
ENSSSCG00000001582	protein_coding	1.505	0.728	1.072	1.094
ENSSSCG00000001583	protein_coding	19.571	37.681	10.58	10.371
ENSSSCG00000001584	protein_coding	13.454	4.286	10.05	10.274
ENSSSCG00000001588	protein_coding	0.016	0.045	0.011	0.009
ENSSSCG00000001589	protein_coding	0	0	0.042	0.018
ENSSSCG00000001592	protein_coding	0	0	0.011	0
ENSSSCG00000001594	protein_coding	0.163	0	0.021	0.331
ENSSSCG00000001595	protein_coding	0.732	1.119	2.027	2.592
ENSSSCG00000001596	protein_coding	0.765	0.282	1.507	1.999
ENSSSCG00000001597	protein_coding	0.065	0.091	0.138	0.11
ENSSSCG00000001598	protein_coding	0.325	0.082	3.131	1.126
ENSSSCG00000001600	protein_coding	0.944	0	1.295	1.3
ENSSSCG00000001605	protein_coding	1.692	0	0.138	0.115
ENSSSCG00000001611	protein_coding	0.691	1.119	0.605	1.006
ENSSSCG00000001612	protein_coding	0.081	0	0.064	0.133
ENSSSCG00000001614	protein_coding	0.488	0	1.719	1.709
ENSSSCG00000001615	protein_coding	0.423	0.51	0.605	1.094
ENSSSCG00000001616	protein_coding	0	0	0.149	0.726
ENSSSCG00000001617	protein_coding	0	0	0	0.014
ENSSSCG00000001618	protein_coding	0	0	0	0.069
ENSSSCG00000001619	protein_coding	0.569	0.883	2.282	3.589
ENSSSCG00000001620	protein_coding	1.261	2.202	2.929	4.604
ENSSSCG00000001621	protein_coding	0.83	0.628	1.613	2.127
ENSSSCG00000001624	protein_coding	0.057	0.237	0.096	0.34
ENSSSCG00000001625	protein_coding	0.106	0	0.021	0.101
ENSSSCG00000001629	protein_coding	0.472	0	0.244	0.505
ENSSSCG00000001630	protein_coding	5.686	8.79	7.344	8.662
ENSSSCG00000001631	protein_coding	1.35	1.674	4.181	3.699
ENSSSCG00000001633	protein_coding	0	0	0.255	0
ENSSSCG00000001634	protein_coding	0	0	0.032	0.096
ENSSSCG00000001636	protein_coding	0.578	0	0.127	0.165
ENSSSCG00000001637	protein_coding	0	0	0.233	0.193
ENSSSCG00000001638	protein_coding	6.637	5.596	4.659	3.235
ENSSSCG00000001639	protein_coding	0.293	0.546	0.424	0.68
ENSSSCG00000001641	protein_coding	2.31	3.34	2.515	3.207
ENSSSCG00000001646	protein_coding	0.301	0.309	0.424	1.172
ENSSSCG00000001650	protein_coding	0.203	0	0.223	0.028
ENSSSCG00000001651	protein_coding	13.812	9.727	15.196	13.808
ENSSSCG00000001652	protein_coding	0.236	0.146	0.35	0.639
ENSSSCG00000001653	protein_coding	0.789	0.528	1.539	1.535
ENSSSCG00000001654	protein_coding	2.359	3.249	2.982	3.745
ENSSSCG00000001655	protein_coding	29.153	40.648	22.805	18.922
ENSSSCG00000001656	protein_coding	3.799	3.967	4.828	3.791
ENSSSCG00000001657	protein_coding	0.927	2.12	1.804	3.12
ENSSSCG00000001658	protein_coding	6.336	4.777	3.884	5.165
ENSSSCG00000001659	protein_coding	2.635	6.952	3.905	6.502
ENSSSCG00000001660	protein_coding	3.563	5.505	10.241	10.403
ENSSSCG00000001661	protein_coding	2.448	2.639	4.171	5.054
ENSSSCG00000001664	protein_coding	0.016	0.009	0.042	0.055
ENSSSCG00000001667	protein_coding	0.659	0.764	0.669	1.346
ENSSSCG00000001672	protein_coding	0	0	0.297	0.257
ENSSSCG00000001675	protein_coding	0.984	0.146	1.9	1.948
ENSSSCG00000001676	protein_coding	0.098	0.255	0.117	0.492
ENSSSCG00000001679	protein_coding	3.628	4.805	3.173	4.457
ENSSSCG00000001680	protein_coding	0.244	0.2	1.443	1.254
ENSSSCG00000001681	protein_coding	0.236	0.801	0.637	0.299
ENSSSCG00000001682	protein_coding	0.163	0	0.127	0.207
ENSSSCG00000001683	protein_coding	1.139	0.883	0.785	1.291
ENSSSCG00000001686	protein_coding	15.365	17.963	14.252	13.353
ENSSSCG00000001688	protein_coding	0.952	1.365	2.218	2.068
ENSSSCG00000001689	protein_coding	1.611	3.067	4.595	1.87
ENSSSCG00000001691	protein_coding	0.114	0	0.488	1.686
ENSSSCG00000001692	protein_coding	12.258	9.045	14.379	13.302
ENSSSCG00000001694	protein_coding	2.513	0	1.571	2.275
ENSSSCG00000001695	protein_coding	16.732	3.658	6.717	8.758
ENSSSCG00000001696	protein_coding	17.927	17.835	15.334	10.426
ENSSSCG00000001697	protein_coding	2.611	1.401	1.815	2.16
ENSSSCG00000001698	protein_coding	0.057	0	0.021	0.018
ENSSSCG00000001700	protein_coding	1.432	1.738	0.838	2.127
ENSSSCG00000001701	protein_coding	23.19	44.67	32.314	34.292
ENSSSCG00000001702	protein_coding	6.125	5.36	3.194	2.486
ENSSSCG00000001703	protein_coding	1.171	1.847	2.122	2.78
ENSSSCG00000001705	protein_coding	0	0	0	1.163
ENSSSCG00000001706	protein_coding	0.561	0.919	1.709	1.466
ENSSSCG00000001708	protein_coding	6.361	6.433	7.917	7.159
ENSSSCG00000001709	protein_coding	0	1.056	0.127	0.129
ENSSSCG00000001710	protein_coding	0.992	0.619	2.886	1.066
ENSSSCG00000001711	protein_coding	20.595	1.092	1.358	1.769
ENSSSCG00000001715	protein_coding	3.546	1.265	0.753	1.149
ENSSSCG00000001716	protein_coding	0.805	0.082	0.775	2.412
ENSSSCG00000001718	protein_coding	4.457	3.358	1.857	2.219
ENSSSCG00000001719	protein_coding	0	0	0	0.101
ENSSSCG00000001720	protein_coding	4.344	3.057	1.507	2.808
ENSSSCG00000001723	protein_coding	5.645	9.154	4.362	5.165
ENSSSCG00000001724	protein_coding	0	0	0	0.032
ENSSSCG00000001725	protein_coding	2.188	1.174	1.199	0.708
ENSSSCG00000001726	protein_coding	0	0	0	0.028
ENSSSCG00000001728	protein_coding	10.501	7.443	10.071	10.444
ENSSSCG00000001729	protein_coding	0	0	0	0.106
ENSSSCG00000001731	protein_coding	0.919	1.401	1.114	1.02
ENSSSCG00000001732	protein_coding	3.628	4.095	3.438	3.065
ENSSSCG00000001734	protein_coding	1.375	1.383	0.679	0.979
ENSSSCG00000001735	protein_coding	0	0.227	0.021	0.069
ENSSSCG00000001736	protein_coding	0	0	0.011	0
ENSSSCG00000001743	protein_coding	0	0	0.106	0
ENSSSCG00000001745	protein_coding	0	0	0.011	0.069
ENSSSCG00000001746	protein_coding	0	0.073	0.011	0.074
ENSSSCG00000001749	protein_coding	0	0	0.053	0
ENSSSCG00000001750	protein_coding	0.26	0.191	0.52	1.484
ENSSSCG00000001751	protein_coding	0.358	0	0.042	0.06
ENSSSCG00000001752	protein_coding	1.049	2.202	1.571	1.365
ENSSSCG00000001753	protein_coding	0.26	0	0.011	0
ENSSSCG00000001754	protein_coding	5.645	4.632	4.415	3.258
ENSSSCG00000001755	protein_coding	0.96	0.164	0.287	0.253
ENSSSCG00000001756	protein_coding	0.878	0	0.223	0.377
ENSSSCG00000001757	protein_coding	15.528	14.377	7.959	6.635
ENSSSCG00000001758	protein_coding	1.855	2.857	4.393	4.021
ENSSSCG00000001759	protein_coding	2.009	2.22	1.666	4.223
ENSSSCG00000001760	protein_coding	1.009	6.597	1.571	1.916
ENSSSCG00000001761	protein_coding	4.14	5.123	2.95	4.117
ENSSSCG00000001762	protein_coding	5.116	9.327	9.519	6.736
ENSSSCG00000001764	protein_coding	0	0.391	0.212	0.363
ENSSSCG00000001765	protein_coding	0.366	0.291	0.913	0.804
ENSSSCG00000001767	protein_coding	0.61	0	1.072	0.781
ENSSSCG00000001769	protein_coding	35.229	38.901	28.377	33.594
ENSSSCG00000001770	protein_coding	152.343	26.425	34.776	16.776
ENSSSCG00000001771	protein_coding	0.016	0.091	0	0.018
ENSSSCG00000001772	protein_coding	0	0	0	0.018
ENSSSCG00000001773	protein_coding	137.694	17.981	23.336	12.636
ENSSSCG00000001774	protein_coding	55.116	1.693	9.805	4.076
ENSSSCG00000001775	protein_coding	0.024	0	0	0.124
ENSSSCG00000001778	protein_coding	0.033	0	1.104	0.211
ENSSSCG00000001779	protein_coding	8.663	4.031	4.393	3.166
ENSSSCG00000001780	protein_coding	20.116	3.085	3.958	5.146
ENSSSCG00000001781	protein_coding	1.415	1.911	1.963	8.487
ENSSSCG00000001782	protein_coding	0.602	0.91	0.467	0.818
ENSSSCG00000001783	protein_coding	0.765	2.393	1.528	3.281
ENSSSCG00000001785	protein_coding	0.277	0.628	1.549	1.581
ENSSSCG00000001786	protein_coding	0	0.255	0.042	0.818
ENSSSCG00000001787	protein_coding	0.643	0.437	0.679	0.845
ENSSSCG00000001788	protein_coding	5.442	1.037	1.252	1.186
ENSSSCG00000001789	protein_coding	0.008	0	0.011	0
ENSSSCG00000001791	protein_coding	0	0	0.064	1.02
ENSSSCG00000001792	protein_coding	2.513	1.975	1.167	1.7
ENSSSCG00000001793	protein_coding	1.594	0.528	0.817	0.432
ENSSSCG00000001794	protein_coding	8.785	0.682	2.324	1.843
ENSSSCG00000001795	protein_coding	0.106	1.301	0.276	0.253
ENSSSCG00000001798	protein_coding	0.203	1.137	0.297	0.354
ENSSSCG00000001799	protein_coding	31.097	32.577	39.445	51.298
ENSSSCG00000001800	protein_coding	2.302	2.684	0.987	1.319
ENSSSCG00000001801	protein_coding	4.978	3.321	2.165	2.739
ENSSSCG00000001804	protein_coding	1.545	1.966	1.666	1.121
ENSSSCG00000001805	protein_coding	0.659	0.91	1.73	1.075
ENSSSCG00000001806	protein_coding	0.073	0.482	0.074	0.074
ENSSSCG00000001807	protein_coding	0.008	0	0.18	0.207
ENSSSCG00000001808	protein_coding	0.268	3.658	0.785	1.236
ENSSSCG00000001810	protein_coding	7.199	3.294	2.632	2.238
ENSSSCG00000001811	protein_coding	0	0.255	0.329	0.469
ENSSSCG00000001814	protein_coding	11.835	9.354	16.321	11.377
ENSSSCG00000001815	protein_coding	0.39	0.227	0.276	0.267
ENSSSCG00000001816	protein_coding	0.504	1.556	0.255	0.322
ENSSSCG00000001817	protein_coding	6.247	2.903	8.659	6.291
ENSSSCG00000001818	protein_coding	5.466	3.394	9.232	4.485
ENSSSCG00000001819	protein_coding	11.721	4.031	6.261	5.565
ENSSSCG00000001820	protein_coding	5.531	6.433	6.601	5.78
ENSSSCG00000001821	protein_coding	5.8	4.013	7.418	6.079
ENSSSCG00000001822	protein_coding	0.48	0.318	0.807	0.528
ENSSSCG00000001823	protein_coding	0.008	0.091	0.032	0.106
ENSSSCG00000001824	protein_coding	1.48	1.993	2.94	2.66
ENSSSCG00000001825	protein_coding	3.408	2.593	3.322	2.477
ENSSSCG00000001826	protein_coding	0.268	0	0.764	1.457
ENSSSCG00000001828	protein_coding	0	0	0.032	0
ENSSSCG00000001829	protein_coding	0.033	0	0.032	0.074
ENSSSCG00000001832	protein_coding	0	0.027	0	0.041
ENSSSCG00000001834	protein_coding	6.434	13.194	8.585	18.077
ENSSSCG00000001835	protein_coding	12.811	5.068	18.529	6.355
ENSSSCG00000001836	protein_coding	0	0	0.053	0.028
ENSSSCG00000001837	protein_coding	0.488	1.219	0.541	1.066
ENSSSCG00000001838	protein_coding	4.531	1.638	4.627	4.535
ENSSSCG00000001840	protein_coding	1.179	0.273	3.969	5.767
ENSSSCG00000001841	protein_coding	0.407	0.009	0.074	0.041
ENSSSCG00000001842	protein_coding	0.138	0.036	0.149	0.354
ENSSSCG00000001844	protein_coding	0	0	0.021	0.018
ENSSSCG00000001846	protein_coding	0.049	0.155	0.042	0.335
ENSSSCG00000001847	protein_coding	0.268	0.246	0.149	0.294
ENSSSCG00000001848	protein_coding	0.952	2.857	1.464	1.562
ENSSSCG00000001849	protein_coding	0.952	0.264	1.401	3.727
ENSSSCG00000001850	protein_coding	8.248	11.966	9.795	12.016
ENSSSCG00000001852	protein_coding	9.419	9.864	23.803	14.879
ENSSSCG00000001858	protein_coding	21.824	26.298	20.333	15.49
ENSSSCG00000001859	protein_coding	1.741	2.63	2.218	1.999
ENSSSCG00000001860	protein_coding	4.84	0.4	0.584	0.556
ENSSSCG00000001861	protein_coding	8.777	9.291	8.914	9.038
ENSSSCG00000001862	protein_coding	13.682	6.77	5.688	3.947
ENSSSCG00000001863	protein_coding	1.017	0	0.096	0.211
ENSSSCG00000001864	protein_coding	0.089	1.683	0	0.055
ENSSSCG00000001865	protein_coding	1.358	1.31	2.621	3.694
ENSSSCG00000001866	protein_coding	13.202	9.1	9.148	5.652
ENSSSCG00000001867	protein_coding	1.44	0.064	1.39	1.645
ENSSSCG00000001868	protein_coding	46.624	30.475	16.778	13.482
ENSSSCG00000001869	protein_coding	1.765	2.302	2.366	3.874
ENSSSCG00000001871	protein_coding	3.278	3.094	3.3	4.894
ENSSSCG00000001872	protein_coding	0.106	0.055	0.424	1.457
ENSSSCG00000001873	protein_coding	0.333	0.255	1.804	1.374
ENSSSCG00000001875	protein_coding	4.335	3.722	8.914	6.199
ENSSSCG00000001876	protein_coding	2.294	2.348	3.884	5.771
ENSSSCG00000001877	protein_coding	3.912	3.522	2.674	2.739
ENSSSCG00000001878	protein_coding	3.254	2.511	2.144	2.178
ENSSSCG00000001879	protein_coding	0	0	0.021	0
ENSSSCG00000001880	protein_coding	2.456	6.843	3.396	5.321
ENSSSCG00000001881	protein_coding	2.497	2.766	4.754	6.405
ENSSSCG00000001882	protein_coding	2.456	2.084	2.674	2.118
ENSSSCG00000001883	protein_coding	0.016	0.118	0.032	0.046
ENSSSCG00000001884	protein_coding	5.328	3.849	6.229	3.534
ENSSSCG00000001885	protein_coding	0.683	0.801	1.953	2.955
ENSSSCG00000001887	protein_coding	3.376	1.492	1.22	1.323
ENSSSCG00000001888	protein_coding	1.204	0.928	0.478	0.859
ENSSSCG00000001892	protein_coding	13.397	9.828	9.201	11.974
ENSSSCG00000001895	protein_coding	0	0	0.064	0.005
ENSSSCG00000001898	protein_coding	2.985	3.776	4.51	2.913
ENSSSCG00000001899	protein_coding	0	0	0.064	0.064
ENSSSCG00000001900	protein_coding	1.228	1.046	1.199	1.599
ENSSSCG00000001901	protein_coding	0.83	2.866	1.295	1.452
ENSSSCG00000001903	protein_coding	1.163	2.302	1.634	1.677
ENSSSCG00000001904	protein_coding	4.889	9.791	8.479	6.915
ENSSSCG00000001905	protein_coding	0.203	2.057	1.21	1.208
ENSSSCG00000001906	protein_coding	0.033	0.027	0.042	0.028
ENSSSCG00000001907	protein_coding	3.018	2.903	5.699	6.341
ENSSSCG00000001908	protein_coding	0.342	0.573	1.709	0.97
ENSSSCG00000001909	protein_coding	0.187	2.794	1.411	2.261
ENSSSCG00000001910	protein_coding	13.137	18.472	52.317	42.168
ENSSSCG00000001912	protein_coding	0.496	0.737	17.361	2.04
ENSSSCG00000001913	protein_coding	1.163	0.983	7.152	2.109
ENSSSCG00000001914	protein_coding	1.033	1.238	6.049	4.59
ENSSSCG00000001915	protein_coding	0	0	0.064	0.023
ENSSSCG00000001916	protein_coding	0.358	0.273	0.138	0.17
ENSSSCG00000001917	protein_coding	8.899	2.93	14.995	14.975
ENSSSCG00000001918	protein_coding	13.096	13.959	9.052	8.078
ENSSSCG00000001919	protein_coding	1.822	3.54	1.539	1.815
ENSSSCG00000001920	protein_coding	0.024	0.282	0.127	0.358
ENSSSCG00000001921	protein_coding	2.668	5.396	5.062	6.162
ENSSSCG00000001922	protein_coding	6.637	6.843	4.977	6.782
ENSSSCG00000001924	protein_coding	7.41	5.478	6.983	7.154
ENSSSCG00000001925	protein_coding	10.867	6.261	10.474	6.948
ENSSSCG00000001926	protein_coding	0.089	0	0.032	0.037
ENSSSCG00000001927	protein_coding	28.241	12.83	13.403	6.001
ENSSSCG00000001928	protein_coding	0.008	0	0.021	0.041
ENSSSCG00000001929	protein_coding	1.643	2.42	2.547	2.78
ENSSSCG00000001930	protein_coding	148.113	68.893	68.67	51.372
ENSSSCG00000001931	protein_coding	0.277	0.173	0.478	0.221
ENSSSCG00000001932	protein_coding	5.133	5.505	4.192	4.641
ENSSSCG00000001934	protein_coding	4.506	2.703	2.483	2.44
ENSSSCG00000001938	protein_coding	0.016	0	0.021	0.069
ENSSSCG00000001940	protein_coding	0	0.227	0.011	0.005
ENSSSCG00000001941	protein_coding	2.945	7.798	2.388	3.92
ENSSSCG00000001942	protein_coding	0.447	1.083	0.053	0.423
ENSSSCG00000001943	protein_coding	0.236	0.073	0.042	0.138
ENSSSCG00000001944	protein_coding	0	0	0.074	0
ENSSSCG00000001946	protein_coding	3.343	6.543	3.184	3.446
ENSSSCG00000001947	protein_coding	0.683	0.109	0.531	0.864
ENSSSCG00000001948	protein_coding	3.53	3.221	3.481	4.963
ENSSSCG00000001949	protein_coding	0	0	0.042	0.041
ENSSSCG00000001950	protein_coding	6.263	4.031	3.12	4.747
ENSSSCG00000001951	protein_coding	27.688	21.621	21.033	10.086
ENSSSCG00000001952	protein_coding	10.216	9.864	15.716	6.254
ENSSSCG00000001955	protein_coding	2.359	2.448	3.3	3.143
ENSSSCG00000001956	protein_coding	1.497	1.501	0.796	0.8
ENSSSCG00000001958	protein_coding	3.197	1.492	3.587	1.81
ENSSSCG00000001959	protein_coding	3.864	2.029	1.337	2.55
ENSSSCG00000001960	protein_coding	4.262	5.169	3.311	3.327
ENSSSCG00000001963	protein_coding	1.009	0.81	3.788	1.48
ENSSSCG00000001964	protein_coding	0.016	0.082	0.265	0.156
ENSSSCG00000001965	protein_coding	2.212	1.156	1.135	1.411
ENSSSCG00000001966	protein_coding	6.011	4.45	4.542	5.744
ENSSSCG00000001968	protein_coding	9.232	0	1.984	3.092
ENSSSCG00000001970	protein_coding	3.001	3.895	2.239	2.486
ENSSSCG00000001971	protein_coding	3.929	3.167	2.844	3.841
ENSSSCG00000001972	protein_coding	2.465	2.602	2.016	2.674
ENSSSCG00000001973	protein_coding	4.132	2.748	1.921	2.307
ENSSSCG00000001974	protein_coding	0.537	1.01	0.531	0.666
ENSSSCG00000001975	protein_coding	3.514	5.751	6.739	3.244
ENSSSCG00000001977	protein_coding	1.009	2.73	4.107	4.462
ENSSSCG00000001978	protein_coding	0.39	0	0.35	0.083
ENSSSCG00000001979	protein_coding	0	0.628	0	0
ENSSSCG00000001982	protein_coding	0.594	0.983	0.138	0.473
ENSSSCG00000001983	protein_coding	2.66	4.013	2.25	2.941
ENSSSCG00000001984	protein_coding	2.595	3.067	10.729	3.92
ENSSSCG00000001985	protein_coding	0.512	1.256	1.316	0.997
ENSSSCG00000001986	protein_coding	2.806	1.456	5.9	4.866
ENSSSCG00000001987	protein_coding	5.019	5.005	3.958	4.214
ENSSSCG00000001988	protein_coding	0.643	0.218	0.414	0.698
ENSSSCG00000001989	protein_coding	0.195	0.309	0.191	0.414
ENSSSCG00000001990	protein_coding	0.366	0.409	0.499	0.496
ENSSSCG00000001991	protein_coding	4.824	6.497	3.81	3.635
ENSSSCG00000001992	protein_coding	1.912	1.256	1.401	2.27
ENSSSCG00000001993	protein_coding	0.033	0.018	0.18	0.051
ENSSSCG00000001994	protein_coding	4.319	5.351	6.155	4.273
ENSSSCG00000001997	protein_coding	3.172	3.203	2.006	4.067
ENSSSCG00000001999	protein_coding	16.252	10.71	11.44	8.859
ENSSSCG00000002000	protein_coding	0.805	1.447	1.592	3.249
ENSSSCG00000002001	protein_coding	0.301	0.328	1.04	0.657
ENSSSCG00000002002	protein_coding	8.329	9.855	66.516	10.247
ENSSSCG00000002003	protein_coding	3.473	2.448	5.943	4.131
ENSSSCG00000002004	protein_coding	32.178	21.502	61.815	10.61
ENSSSCG00000002005	protein_coding	0.854	1.347	1.74	1.342
ENSSSCG00000002006	protein_coding	13.299	16.134	26.721	10.683
ENSSSCG00000002007	protein_coding	0	0	0.255	0.216
ENSSSCG00000002008	protein_coding	6.694	6.452	5.232	5.877
ENSSSCG00000002009	protein_coding	1.944	1.001	1.082	0.749
ENSSSCG00000002010	protein_coding	0	0.018	0	0
ENSSSCG00000002011	protein_coding	0.008	0.018	0.042	0.069
ENSSSCG00000002012	protein_coding	0.415	0.027	0.212	0.096
ENSSSCG00000002013	protein_coding	90.264	3.44	4.998	4.269
ENSSSCG00000002014	protein_coding	0.236	0.237	0.488	0.533
ENSSSCG00000002015	protein_coding	2.489	4.259	3.735	4.719
ENSSSCG00000002016	protein_coding	1.554	2.73	1.507	3.152
ENSSSCG00000002017	protein_coding	0.211	0	0.117	0.147
ENSSSCG00000002020	protein_coding	3.807	9.8	5.847	5.146
ENSSSCG00000002021	protein_coding	1.017	0.965	0.573	0.749
ENSSSCG00000002022	protein_coding	4.132	0.391	3.544	3.515
ENSSSCG00000002023	protein_coding	17.74	34.933	11.716	25.92
ENSSSCG00000002025	protein_coding	3.408	3.576	6.219	8.56
ENSSSCG00000002026	protein_coding	0.008	0.246	1.422	3.001
ENSSSCG00000002028	protein_coding	0.081	0.874	0.849	0.786
ENSSSCG00000002029	protein_coding	1.92	1.056	0.87	1.02
ENSSSCG00000002032	protein_coding	0.277	0.883	0.35	0.62
ENSSSCG00000002033	protein_coding	0.073	0.373	0.042	0.129
ENSSSCG00000002034	protein_coding	6.971	7.18	8.246	12.903
ENSSSCG00000002035	protein_coding	27.274	17.28	24.397	21.776
ENSSSCG00000002036	protein_coding	29.34	19.946	23.93	17.047
ENSSSCG00000002037	protein_coding	0.594	0.1	0.52	1.015
ENSSSCG00000002039	protein_coding	17.919	13.349	28.069	26.508
ENSSSCG00000002040	protein_coding	3.571	4.532	5.083	3.92
ENSSSCG00000002041	protein_coding	1.765	2.084	1.857	2.1
ENSSSCG00000002042	protein_coding	20.97	14.787	16.682	14.056
ENSSSCG00000002045	protein_coding	0.415	0.045	0.074	0.055
ENSSSCG00000002047	protein_coding	0	0	0.18	0.289
ENSSSCG00000002048	protein_coding	0.187	0	0	0.611
ENSSSCG00000002049	protein_coding	0	0	0.382	0.303
ENSSSCG00000002050	protein_coding	79.185	55.972	45.78	34.784
ENSSSCG00000002051	protein_coding	43.062	14.405	19.643	16.519
ENSSSCG00000002052	protein_coding	0	0	0	0.069
ENSSSCG00000002053	protein_coding	0	0	0	0.294
ENSSSCG00000002062	protein_coding	0	2.766	0	0
ENSSSCG00000002063	protein_coding	0	0	0	0.124
ENSSSCG00000002069	protein_coding	0	1.984	0	0
ENSSSCG00000002071	protein_coding	1.684	0	0	0
ENSSSCG00000002072	protein_coding	0	0	0.265	0
ENSSSCG00000002077	protein_coding	0.106	0	0.042	0.11
ENSSSCG00000002078	protein_coding	0	0	0	0.124
ENSSSCG00000002081	protein_coding	0.838	1.547	0.732	1.53
ENSSSCG00000002084	protein_coding	0	0.346	0	0
ENSSSCG00000002085	protein_coding	0	0	0.233	0
ENSSSCG00000002090	protein_coding	0	0	0	0.119
ENSSSCG00000002095	protein_coding	0	0	0.393	0
ENSSSCG00000002097	protein_coding	0	0	0.117	0.092
ENSSSCG00000002099	protein_coding	0	0	0	0.248
ENSSSCG00000002105	protein_coding	0	0	0	0.009
ENSSSCG00000002127	protein_coding	2.969	3.13	3.162	5.027
ENSSSCG00000002129	protein_coding	0	0.264	0.541	0.078
ENSSSCG00000002130	protein_coding	0	0	0	0.018
ENSSSCG00000002131	protein_coding	0.106	0.027	0.371	0.662
ENSSSCG00000002133	protein_coding	0	0	0.053	0.225
ENSSSCG00000002134	protein_coding	0	0.455	0.064	0.037
ENSSSCG00000002135	protein_coding	4.954	4.932	2.855	3.648
ENSSSCG00000002136	protein_coding	1.684	1.256	1.019	1.084
ENSSSCG00000002137	protein_coding	19.595	31.585	13.201	13.679
ENSSSCG00000002138	protein_coding	1.245	3.895	2.664	2.945
ENSSSCG00000002139	protein_coding	0.317	0	0.287	0.101
ENSSSCG00000002140	protein_coding	0.098	0	0.032	0.023
ENSSSCG00000002141	protein_coding	2.709	6.552	4.553	4.82
ENSSSCG00000002142	protein_coding	0.529	1.292	1.104	1.328
ENSSSCG00000002143	protein_coding	2.595	3.239	1.592	3.102
ENSSSCG00000002144	protein_coding	0.024	0	0.042	0.221
ENSSSCG00000002145	protein_coding	2.245	2.548	2.642	2.739
ENSSSCG00000002148	protein_coding	0	0	0	0.037
ENSSSCG00000002159	protein_coding	0	0.082	0.064	0.041
ENSSSCG00000002164	protein_coding	0.146	0	0.053	0.041
ENSSSCG00000002170	protein_coding	0	0	0	0.028
ENSSSCG00000002172	protein_coding	0	0	0	0.051
ENSSSCG00000002173	protein_coding	0	0	0.223	0
ENSSSCG00000002175	protein_coding	0.057	0	0	0
ENSSSCG00000002176	protein_coding	0	0	0.021	0.037
ENSSSCG00000002180	protein_coding	0	0	0.021	0
ENSSSCG00000002184	protein_coding	0.033	0	0.032	0
ENSSSCG00000002187	protein_coding	0.187	0.51	0	0
ENSSSCG00000002190	protein_coding	0.073	0	0.053	0
ENSSSCG00000002196	protein_coding	0.74	0	0.096	0.046
ENSSSCG00000002202	protein_coding	0	0	0.053	0.046
ENSSSCG00000002235	protein_coding	1.041	0.701	1.571	2.118
ENSSSCG00000002241	protein_coding	0.033	0.091	0.106	0.211
ENSSSCG00000002243	protein_coding	2.741	2.047	2.25	1.81
ENSSSCG00000002245	protein_coding	1.578	0.91	1.793	0.574
ENSSSCG00000002246	protein_coding	0	0	0.042	0.046
ENSSSCG00000002247	protein_coding	0.187	0	0.435	0.23
ENSSSCG00000002250	protein_coding	2.766	0	1.698	0.138
ENSSSCG00000002251	protein_coding	0.862	0	0.424	0.092
ENSSSCG00000002252	protein_coding	13.348	12.021	7.333	5.532
ENSSSCG00000002254	protein_coding	2.4	3.421	3.332	4.705
ENSSSCG00000002257	protein_coding	2.757	0.855	0.785	0.891
ENSSSCG00000002258	protein_coding	0.756	1.319	0.944	0.652
ENSSSCG00000002259	protein_coding	5.271	5.123	12.756	8.202
ENSSSCG00000002260	protein_coding	5.035	2.803	4.574	2.665
ENSSSCG00000002262	protein_coding	0.155	0.218	0.382	0.317
ENSSSCG00000002263	protein_coding	2.212	1.811	0.637	2.192
ENSSSCG00000002264	protein_coding	0.171	0	0.849	0.289
ENSSSCG00000002265	protein_coding	1.375	1.174	4.765	0.97
ENSSSCG00000002266	protein_coding	6.328	6.306	8.787	9.971
ENSSSCG00000002267	protein_coding	0.586	0.318	1.645	3.598
ENSSSCG00000002268	protein_coding	1.977	0.5	0.424	0.781
ENSSSCG00000002269	protein_coding	6.662	3.549	2.865	5.675
ENSSSCG00000002270	protein_coding	0.008	0	0	0.014
ENSSSCG00000002274	protein_coding	11.225	16.043	38.893	37.077
ENSSSCG00000002275	protein_coding	1.456	2.011	1.422	1.852
ENSSSCG00000002276	protein_coding	3.994	2.511	4.754	5.514
ENSSSCG00000002277	protein_coding	0.081	0.155	0.117	0.106
ENSSSCG00000002279	protein_coding	0.228	0.901	0.223	1.567
ENSSSCG00000002280	protein_coding	0.447	1.902	13.573	7.986
ENSSSCG00000002281	protein_coding	0.992	1.611	1.942	1.388
ENSSSCG00000002282	protein_coding	86.839	158.324	301.201	147.448
ENSSSCG00000002283	protein_coding	2.798	3.03	4.966	2.812
ENSSSCG00000002284	protein_coding	0	0	0.032	0
ENSSSCG00000002285	protein_coding	5.417	2.912	2.526	2.348
ENSSSCG00000002286	protein_coding	0.122	0	0.127	0.074
ENSSSCG00000002287	protein_coding	1.155	0.864	1.804	2.279
ENSSSCG00000002288	protein_coding	9.257	8.927	4.139	4.632
ENSSSCG00000002290	protein_coding	0.073	0.218	0.149	0.349
ENSSSCG00000002292	protein_coding	0.529	0.628	0.775	0.744
ENSSSCG00000002294	protein_coding	8.305	6.452	3.81	4.577
ENSSSCG00000002295	protein_coding	13.86	9.646	8.458	9.328
ENSSSCG00000002296	protein_coding	102.335	12.721	18.932	13.647
ENSSSCG00000002297	protein_coding	64.3	9.309	4.277	6.718
ENSSSCG00000002298	protein_coding	0.626	0.764	1.22	1.277
ENSSSCG00000002299	protein_coding	2.204	1.647	1.231	0.882
ENSSSCG00000002303	protein_coding	6.32	3.121	5.147	3.612
ENSSSCG00000002305	protein_coding	0.659	0.591	0.562	1.089
ENSSSCG00000002306	protein_coding	0.399	0.255	0.233	0.285
ENSSSCG00000002307	protein_coding	10.786	14.177	9.89	8.524
ENSSSCG00000002309	protein_coding	0.122	0	0.011	0.055
ENSSSCG00000002310	protein_coding	0	0	0.011	0
ENSSSCG00000002311	protein_coding	1.269	1.674	3.99	2.881
ENSSSCG00000002312	protein_coding	5.287	6.579	4.478	13.119
ENSSSCG00000002313	protein_coding	0.285	0.127	0.308	0.675
ENSSSCG00000002314	protein_coding	8.988	0.191	1.189	1.043
ENSSSCG00000002315	protein_coding	0.041	0.064	0.011	0.087
ENSSSCG00000002316	protein_coding	2.668	3.076	1.528	1.025
ENSSSCG00000002317	protein_coding	0	0	0.096	0.106
ENSSSCG00000002321	protein_coding	0.073	0.264	0.159	0.083
ENSSSCG00000002322	protein_coding	0	0	0.011	0.051
ENSSSCG00000002326	protein_coding	0.138	0.455	0.233	0.285
ENSSSCG00000002328	protein_coding	4.01	11.529	9.275	6.842
ENSSSCG00000002329	protein_coding	0.155	0.009	0.138	0.244
ENSSSCG00000002330	protein_coding	5.092	4.45	5.041	4.145
ENSSSCG00000002332	protein_coding	3.01	3.067	3.003	4.535
ENSSSCG00000002333	protein_coding	0.545	5.705	1.709	2.936
ENSSSCG00000002337	protein_coding	2.831	3.067	2.154	3.267
ENSSSCG00000002340	protein_coding	17.871	9.045	9.01	5.712
ENSSSCG00000002341	protein_coding	0.366	0.428	4.001	2.523
ENSSSCG00000002342	protein_coding	1.155	0.928	0.881	2.008
ENSSSCG00000002345	protein_coding	0.7	0.819	1.114	2.077
ENSSSCG00000002346	protein_coding	2.871	1.256	4.139	5.523
ENSSSCG00000002347	protein_coding	3.294	3.467	1.793	3.138
ENSSSCG00000002348	protein_coding	1.749	0.573	0.308	0.372
ENSSSCG00000002349	protein_coding	6.434	3.74	2.112	1.861
ENSSSCG00000002350	protein_coding	1.098	0.491	4.117	4.884
ENSSSCG00000002351	protein_coding	6.483	2.502	2.282	3.166
ENSSSCG00000002352	protein_coding	1.066	1.811	1.464	1.369
ENSSSCG00000002353	protein_coding	0.813	0.4	0.552	0.891
ENSSSCG00000002354	protein_coding	12.738	4.613	3.523	2.693
ENSSSCG00000002355	protein_coding	4.547	4.377	1.56	3.409
ENSSSCG00000002356	protein_coding	0.106	0.255	0.053	0.262
ENSSSCG00000002357	protein_coding	9.086	6.297	5.359	7.517
ENSSSCG00000002359	protein_coding	0.26	0	0.244	0.184
ENSSSCG00000002361	protein_coding	0	0	0.096	0.092
ENSSSCG00000002362	protein_coding	5.246	2.166	9.954	1.893
ENSSSCG00000002363	protein_coding	0	0	0.021	0
ENSSSCG00000002366	protein_coding	99	46.117	37.853	21.233
ENSSSCG00000002367	protein_coding	9.769	4.186	5.571	5.224
ENSSSCG00000002368	protein_coding	0.732	0.764	1.581	2.853
ENSSSCG00000002370	protein_coding	1.749	1.028	1.305	1.048
ENSSSCG00000002372	protein_coding	0.594	0.874	1.135	2.192
ENSSSCG00000002373	protein_coding	0	0	0.011	0.005
ENSSSCG00000002374	protein_coding	4.571	3.094	2.409	3.249
ENSSSCG00000002375	protein_coding	0.333	0	0.074	0.198
ENSSSCG00000002376	protein_coding	1.464	0.546	1.348	1.696
ENSSSCG00000002377	protein_coding	8.289	11.611	7.354	5.569
ENSSSCG00000002378	protein_coding	1.391	1.137	0.966	1.19
ENSSSCG00000002379	protein_coding	2.522	6.361	2.43	2.242
ENSSSCG00000002380	protein_coding	0	0.637	0.053	0.561
ENSSSCG00000002381	protein_coding	2.57	2.903	3.003	4.462
ENSSSCG00000002382	protein_coding	81.341	38.828	51.617	37.201
ENSSSCG00000002383	protein_coding	3.351	15.178	37.259	51.096
ENSSSCG00000002384	protein_coding	2.172	2.912	2.101	6.364
ENSSSCG00000002385	protein_coding	2.855	2.02	3.513	2.33
ENSSSCG00000002386	protein_coding	21.441	19.346	26.265	23.572
ENSSSCG00000002387	protein_coding	4.1	4.04	4.775	5.036
ENSSSCG00000002388	protein_coding	0	0	0.032	0.051
ENSSSCG00000002389	protein_coding	2.31	2.357	1.677	3.414
ENSSSCG00000002390	protein_coding	1.139	0.946	1.433	2.017
ENSSSCG00000002391	protein_coding	0	0	0.011	0
ENSSSCG00000002392	protein_coding	0.911	1.137	3.035	4.866
ENSSSCG00000002395	protein_coding	2.229	1.301	3.98	6.47
ENSSSCG00000002396	protein_coding	12.234	9.964	12.045	12.985
ENSSSCG00000002397	protein_coding	0.618	0.819	0.647	0.947
ENSSSCG00000002398	protein_coding	0.041	0	0.011	0
ENSSSCG00000002399	protein_coding	0	0	0.053	0.101
ENSSSCG00000002403	protein_coding	2.554	4.786	2.94	2.302
ENSSSCG00000002404	protein_coding	3.921	1.602	1.857	1.337
ENSSSCG00000002405	protein_coding	0.138	0	0.032	0.074
ENSSSCG00000002406	protein_coding	10.298	17.799	14.358	9.728
ENSSSCG00000002408	protein_coding	0.171	0.437	0.127	0.423
ENSSSCG00000002409	protein_coding	0	0	0.042	0
ENSSSCG00000002410	protein_coding	0.342	1.884	2.886	4.021
ENSSSCG00000002411	protein_coding	2.644	1.847	2.345	2.394
ENSSSCG00000002412	protein_coding	1.293	0.5	0.944	0.997
ENSSSCG00000002414	protein_coding	9.777	5.906	6.452	10.463
ENSSSCG00000002418	protein_coding	1.822	1.702	1.592	2.339
ENSSSCG00000002424	protein_coding	0.765	0.892	1.327	1.507
ENSSSCG00000002425	protein_coding	1.35	1.156	1.189	2.362
ENSSSCG00000002426	protein_coding	11.461	11.52	7.513	7.324
ENSSSCG00000002427	protein_coding	0.7	0.619	0.424	0.597
ENSSSCG00000002428	protein_coding	2.424	3.194	1.443	1.861
ENSSSCG00000002429	protein_coding	4.88	3.221	7.407	6.998
ENSSSCG00000002430	protein_coding	2.538	2.348	1.21	1.117
ENSSSCG00000002431	protein_coding	1.098	2.885	1.295	1.737
ENSSSCG00000002432	protein_coding	0.13	0.036	0.127	0.459
ENSSSCG00000002433	protein_coding	12.868	13.085	10.304	18.807
ENSSSCG00000002434	protein_coding	1.448	1.474	1.709	2.026
ENSSSCG00000002436	protein_coding	0.691	1.529	1.252	2.895
ENSSSCG00000002437	protein_coding	0.423	0.209	0.287	0.45
ENSSSCG00000002438	protein_coding	0.033	0.355	0.032	0.11
ENSSSCG00000002439	protein_coding	0.114	0	0.308	0.17
ENSSSCG00000002440	protein_coding	0.155	0.209	0.361	0.947
ENSSSCG00000002441	protein_coding	3.01	3.512	5.041	5.119
ENSSSCG00000002442	protein_coding	0.626	0.018	0.021	0.014
ENSSSCG00000002443	protein_coding	14.048	0.846	0.669	0.625
ENSSSCG00000002444	protein_coding	6.133	1.665	3.322	3.86
ENSSSCG00000002445	protein_coding	2.717	1.62	2.833	4.531
ENSSSCG00000002446	protein_coding	2.188	3.758	2.536	2.863
ENSSSCG00000002447	protein_coding	5.051	4.932	3.46	3.239
ENSSSCG00000002448	protein_coding	2.619	1.529	1.634	1.411
ENSSSCG00000002449	protein_coding	10.233	60.54	22.826	28.245
ENSSSCG00000002450	protein_coding	0	0	0.117	0.078
ENSSSCG00000002451	protein_coding	0.277	0.255	1.963	2.32
ENSSSCG00000002452	protein_coding	91.191	15.424	24.737	18.931
ENSSSCG00000002453	protein_coding	0.041	0	0.17	0.193
ENSSSCG00000002455	protein_coding	3.473	4.559	4.436	3.534
ENSSSCG00000002456	protein_coding	1.358	7.207	5.921	9.452
ENSSSCG00000002457	protein_coding	4.116	1.738	7.407	6.217
ENSSSCG00000002458	protein_coding	1.269	1.083	1.146	0.763
ENSSSCG00000002459	protein_coding	3.75	2.284	7.895	11.184
ENSSSCG00000002460	protein_coding	1.993	1.811	2.027	1.953
ENSSSCG00000002461	protein_coding	2.709	1.656	1.666	2.463
ENSSSCG00000002464	protein_coding	0	0	0.053	0.06
ENSSSCG00000002467	protein_coding	0.187	0.036	0.828	0.813
ENSSSCG00000002469	protein_coding	1.106	0.983	0.87	0.675
ENSSSCG00000002470	protein_coding	3.799	4.204	6.951	6.654
ENSSSCG00000002471	protein_coding	11.136	21.075	616.144	28.879
ENSSSCG00000002472	protein_coding	19.009	11.092	21.585	14.355
ENSSSCG00000002474	protein_coding	0.919	0.318	1.284	0.404
ENSSSCG00000002475	protein_coding	0.163	1.228	0.329	0.152
ENSSSCG00000002476	protein_coding	0.171	0.382	0.233	0.708
ENSSSCG00000002478	protein_coding	0	0	0.042	0
ENSSSCG00000002479	protein_coding	0.228	0.018	0.085	0
ENSSSCG00000002481	protein_coding	0.13	0.737	0.149	0.225
ENSSSCG00000002482	protein_coding	0.187	0.346	0.382	0.023
ENSSSCG00000002483	protein_coding	0.293	0.255	0.191	0.041
ENSSSCG00000002484	protein_coding	0	0.118	0.127	0
ENSSSCG00000002486	protein_coding	0.089	0.055	0.042	0.009
ENSSSCG00000002487	protein_coding	0.114	0.109	0.17	0.074
ENSSSCG00000002490	protein_coding	0	0	0.117	0
ENSSSCG00000002494	protein_coding	0.187	0.382	0.435	0.708
ENSSSCG00000002495	protein_coding	1.586	1.538	2.876	4.039
ENSSSCG00000002496	protein_coding	6.971	3.394	2.632	2.426
ENSSSCG00000002497	protein_coding	0.049	3.913	0.679	0.138
ENSSSCG00000002498	protein_coding	0	0	0.499	0.28
ENSSSCG00000002499	protein_coding	2.635	1.247	3.757	3.364
ENSSSCG00000002501	protein_coding	0	0	0	0.257
ENSSSCG00000002502	protein_coding	1.741	1.647	1.252	1.323
ENSSSCG00000002504	protein_coding	0.081	0	0.18	3.042
ENSSSCG00000002505	protein_coding	8.866	8.554	7.832	9.36
ENSSSCG00000002506	protein_coding	0.74	1.465	0.488	1.333
ENSSSCG00000002507	protein_coding	0	0.009	0	0.037
ENSSSCG00000002508	protein_coding	8.492	8.681	10.007	7.118
ENSSSCG00000002509	protein_coding	0.211	0.4	0.329	0.597
ENSSSCG00000002510	protein_coding	0.016	0.018	0.021	0.092
ENSSSCG00000002511	protein_coding	0.732	0.682	0.276	0.804
ENSSSCG00000002512	protein_coding	0.089	0	0.244	0.441
ENSSSCG00000002515	protein_coding	0.057	0	0.775	0.712
ENSSSCG00000002516	protein_coding	8.069	7.625	11.854	9.057
ENSSSCG00000002517	protein_coding	0.374	0.582	1.815	3.23
ENSSSCG00000002520	protein_coding	1.92	1.683	4.839	3.534
ENSSSCG00000002523	protein_coding	2.928	1.975	4.691	6.033
ENSSSCG00000002524	protein_coding	0.114	0	0	0.023
ENSSSCG00000002525	protein_coding	1.472	0.218	1.019	1.912
ENSSSCG00000002526	protein_coding	0.903	0.637	1.475	1.424
ENSSSCG00000002527	protein_coding	0.171	0	0.223	0.156
ENSSSCG00000002528	protein_coding	1.464	0.546	1.422	2.049
ENSSSCG00000002529	protein_coding	568.791	1315.77	1342.7	924.393
ENSSSCG00000002530	protein_coding	34.854	18.572	23.951	31.508
ENSSSCG00000002531	protein_coding	0.081	0	0.52	1.76
ENSSSCG00000002532	protein_coding	0.659	0.746	1.677	1.337
ENSSSCG00000002533	protein_coding	2.782	2.238	3.544	2.619
ENSSSCG00000002535	protein_coding	51.733	74.034	84.111	93.728
ENSSSCG00000002536	protein_coding	0.073	0	0.212	0.758
ENSSSCG00000002538	protein_coding	1.131	0.773	2.473	2.187
ENSSSCG00000002539	protein_coding	6.133	5.569	26.551	24.997
ENSSSCG00000002540	protein_coding	7.931	6.67	7.439	7.917
ENSSSCG00000002541	protein_coding	0	0	0.149	0.152
ENSSSCG00000002542	protein_coding	0.586	1.074	5.157	4.333
ENSSSCG00000002543	protein_coding	0.399	0	2.207	2.66
ENSSSCG00000002544	protein_coding	0.561	0.874	1.231	1.544
ENSSSCG00000002545	protein_coding	1.399	4.823	28.918	13.831
ENSSSCG00000002546	protein_coding	0.155	0.055	0.446	0.818
ENSSSCG00000002547	protein_coding	8.891	9.518	20.8	14.143
ENSSSCG00000002550	protein_coding	28.673	39.174	43.785	23.159
ENSSSCG00000002551	protein_coding	1.228	0.227	3.077	4.397
ENSSSCG00000002552	protein_coding	0.008	0	0.106	0.074
ENSSSCG00000002553	protein_coding	0.041	0	0	0
ENSSSCG00000002554	protein_coding	0.089	0	1.655	0.997
ENSSSCG00000002555	protein_coding	0.203	0.118	0.52	1.048
ENSSSCG00000002557	protein_coding	0.098	0	0.732	2.385
ENSSSCG00000002558	protein_coding	0.081	0.009	0.488	0.744
ENSSSCG00000002559	protein_coding	0	0	0.52	0.597
ENSSSCG00000002560	protein_coding	0.041	0	0.106	0.101
ENSSSCG00000002563	protein_coding	0	0.018	0.021	0
ENSSSCG00000002572	protein_coding	0	0	0.032	0
ENSSSCG00000002573	protein_coding	0	0	0.021	0.06
ENSSSCG00000002581	protein_coding	0	0	0.021	0.028
ENSSSCG00000002586	protein_coding	0.26	0.018	0.053	0.009
ENSSSCG00000002589	protein_coding	0	0.055	0	0
ENSSSCG00000002594	protein_coding	0.399	0	0.096	0.028
ENSSSCG00000002599	protein_coding	0.098	0	0	0
ENSSSCG00000002600	protein_coding	0	0	0.021	0
ENSSSCG00000002601	protein_coding	0	0	0.053	0
ENSSSCG00000002608	protein_coding	0	0	0.011	0
ENSSSCG00000002610	protein_coding	0	0	0.042	0
ENSSSCG00000002612	protein_coding	0	0	0.021	0
ENSSSCG00000002615	protein_coding	0	0	0.064	0
ENSSSCG00000002618	protein_coding	0	0	0.074	0
ENSSSCG00000002619	protein_coding	0	0	0.509	0.882
ENSSSCG00000002620	protein_coding	0.716	1.274	0.987	4.48
ENSSSCG00000002621	protein_coding	14.178	3.376	3.672	5.996
ENSSSCG00000002622	protein_coding	3.254	5.159	4.075	2.936
ENSSSCG00000002623	protein_coding	702.597	303.581	234.982	109.291
ENSSSCG00000002624	protein_coding	5.222	1.865	31.794	1.746
ENSSSCG00000002625	protein_coding	0	0	0.053	0.046
ENSSSCG00000002626	protein_coding	169.059	123.909	6.028	8.933
ENSSSCG00000002627	protein_coding	23.963	122.808	55.119	27.115
ENSSSCG00000002628	protein_coding	1.301	1.884	1.942	2.063
ENSSSCG00000002629	protein_coding	4.856	4.077	2.197	3.396
ENSSSCG00000002630	protein_coding	0	0	0.021	0.051
ENSSSCG00000002633	protein_coding	0.496	0.51	2.175	3.033
ENSSSCG00000002635	protein_coding	0.472	0.064	1.91	2.527
ENSSSCG00000002636	protein_coding	17.309	8.554	25.288	21.468
ENSSSCG00000002637	protein_coding	0.187	0.328	1.22	1.222
ENSSSCG00000002639	protein_coding	0.033	0.018	0.032	0.069
ENSSSCG00000002640	protein_coding	2.562	1.41	6.038	6.286
ENSSSCG00000002642	protein_coding	0	0.173	0.064	0.023
ENSSSCG00000002645	protein_coding	1.903	2.229	6.569	10.789
ENSSSCG00000002646	protein_coding	64.674	50.776	64.701	29.04
ENSSSCG00000002648	protein_coding	0.073	0	0.106	0.184
ENSSSCG00000002650	protein_coding	14.332	3.212	12.183	20.498
ENSSSCG00000002651	protein_coding	0.155	0.146	0.34	0.868
ENSSSCG00000002652	protein_coding	3.123	0.5	8.129	6.869
ENSSSCG00000002653	protein_coding	0.22	0.519	0.382	0.45
ENSSSCG00000002654	protein_coding	1.196	0.728	3.364	2.445
ENSSSCG00000002655	protein_coding	10.176	7.089	5.465	4.586
ENSSSCG00000002656	protein_coding	0.268	0.091	1.242	2.371
ENSSSCG00000002657	protein_coding	0.382	0	0.064	0.184
ENSSSCG00000002658	protein_coding	0.114	0	0.191	0.211
ENSSSCG00000002660	protein_coding	1.692	0.591	2.016	1.967
ENSSSCG00000002662	protein_coding	0.773	0	1.995	3.216
ENSSSCG00000002663	protein_coding	0.968	6.051	5.561	3.488
ENSSSCG00000002664	protein_coding	0.187	0.337	0.488	0.942
ENSSSCG00000002666	protein_coding	14.088	2.83	16.236	7.848
ENSSSCG00000002667	protein_coding	2.619	3.221	4.362	5.27
ENSSSCG00000002668	protein_coding	0	0	0.053	1.346
ENSSSCG00000002669	protein_coding	14.706	17.089	85.671	107.518
ENSSSCG00000002670	protein_coding	1.009	1.72	1.295	2.224
ENSSSCG00000002671	protein_coding	0.268	0.355	0.297	0.744
ENSSSCG00000002672	protein_coding	0.407	0.091	1.677	1.732
ENSSSCG00000002675	protein_coding	0.089	0	0.775	2.33
ENSSSCG00000002677	protein_coding	0	0.009	0.021	0.032
ENSSSCG00000002680	protein_coding	0.301	0.355	0.955	1.314
ENSSSCG00000002681	protein_coding	1.822	2.384	1.369	2.688
ENSSSCG00000002682	protein_coding	5.507	4.25	8.373	8.57
ENSSSCG00000002684	protein_coding	1.342	0.591	1.04	1.507
ENSSSCG00000002686	protein_coding	29.942	0.5	0.276	0.046
ENSSSCG00000002688	protein_coding	0.464	0.382	0.584	0.565
ENSSSCG00000002689	protein_coding	0.602	0.773	0.976	1.677
ENSSSCG00000002690	protein_coding	0.407	0.136	0.785	0.933
ENSSSCG00000002694	protein_coding	0	0	0.584	0.221
ENSSSCG00000002696	protein_coding	6.8	2.166	2.091	6.304
ENSSSCG00000002697	protein_coding	0.39	2.148	0.838	1.02
ENSSSCG00000002699	protein_coding	0	0	0.074	0.193
ENSSSCG00000002700	protein_coding	0.724	1.11	0.318	1.507
ENSSSCG00000002701	protein_coding	2.928	4.932	5.858	4.094
ENSSSCG00000002702	protein_coding	0	0	0.064	0.395
ENSSSCG00000002703	protein_coding	6.93	9.809	7.237	6.065
ENSSSCG00000002704	protein_coding	52.099	89.349	70.58	79.902
ENSSSCG00000002705	protein_coding	0.553	3.085	1.093	1.043
ENSSSCG00000002706	protein_coding	0.634	3.685	1.645	1.383
ENSSSCG00000002707	protein_coding	13.576	9.109	6.898	4.604
ENSSSCG00000002708	protein_coding	1.383	1.592	1.263	2.633
ENSSSCG00000002709	protein_coding	0.024	0	0.074	0.161
ENSSSCG00000002712	protein_coding	7.858	1.147	1.369	2.84
ENSSSCG00000002714	protein_coding	1.863	1.401	1.072	1.489
ENSSSCG00000002715	protein_coding	1.196	0.937	1.135	1.268
ENSSSCG00000002716	protein_coding	11.754	0	5.455	6.291
ENSSSCG00000002718	protein_coding	0.057	0	0.287	0.179
ENSSSCG00000002719	protein_coding	0	0	0.509	1.296
ENSSSCG00000002720	protein_coding	3.888	0.473	1.475	0.354
ENSSSCG00000002721	protein_coding	3.27	2.111	2.069	2.615
ENSSSCG00000002722	protein_coding	5.531	5.296	4.637	3.676
ENSSSCG00000002723	protein_coding	9.509	6.479	6.972	8.073
ENSSSCG00000002724	protein_coding	2.424	1.956	1.931	2.803
ENSSSCG00000002725	protein_coding	3.262	4.677	4.181	4.356
ENSSSCG00000002726	protein_coding	0.659	0.546	1.91	4.158
ENSSSCG00000002727	protein_coding	7.435	4.395	7.704	5.326
ENSSSCG00000002729	protein_coding	4.091	3.767	4.192	4.08
ENSSSCG00000002730	protein_coding	0	0	0	0.032
ENSSSCG00000002731	protein_coding	0	0	0.053	0.014
ENSSSCG00000002734	protein_coding	0.057	0	0.106	0.386
ENSSSCG00000002736	protein_coding	0.081	0.018	0.021	0.009
ENSSSCG00000002737	protein_coding	6.881	0	0.011	0
ENSSSCG00000002738	protein_coding	0.277	0.282	0.52	0.956
ENSSSCG00000002739	protein_coding	2.416	0.901	1.093	1.291
ENSSSCG00000002740	protein_coding	5.263	2.948	2.579	3.157
ENSSSCG00000002741	protein_coding	3.587	3.822	3.895	2.353
ENSSSCG00000002742	protein_coding	2.334	0.546	5.136	4.09
ENSSSCG00000002743	protein_coding	12.909	15.851	11.323	8.914
ENSSSCG00000002745	protein_coding	0.187	0	0.064	0.202
ENSSSCG00000002746	protein_coding	1.48	3.522	1.762	2.909
ENSSSCG00000002747	protein_coding	0.073	0	0.159	0.051
ENSSSCG00000002748	protein_coding	0.732	0.318	1.762	1.994
ENSSSCG00000002749	protein_coding	17.147	2.457	2.993	3.281
ENSSSCG00000002752	protein_coding	0.309	0.246	0.594	0.997
ENSSSCG00000002753	protein_coding	3.929	8.026	3.958	5.707
ENSSSCG00000002754	protein_coding	5.832	5.323	3.385	6.176
ENSSSCG00000002755	protein_coding	3.701	5.997	4.415	5.909
ENSSSCG00000002756	protein_coding	33.659	12.821	14.082	10.881
ENSSSCG00000002758	protein_coding	1.472	0	1.029	1.64
ENSSSCG00000002759	protein_coding	3.888	4.268	4.064	2.445
ENSSSCG00000002760	protein_coding	0.659	2.111	1.401	1.19
ENSSSCG00000002761	protein_coding	0	0	0.053	0.276
ENSSSCG00000002762	protein_coding	3.799	4.122	2.335	2.417
ENSSSCG00000002763	protein_coding	13.389	19.601	14.613	13.192
ENSSSCG00000002764	protein_coding	0.399	0.227	0.615	0.381
ENSSSCG00000002767	protein_coding	0.293	0	0.106	0.919
ENSSSCG00000002768	protein_coding	0.504	2.175	0.562	1.42
ENSSSCG00000002769	protein_coding	4.856	9.545	9.477	15.421
ENSSSCG00000002771	protein_coding	2.717	2.184	3.3	4.457
ENSSSCG00000002773	protein_coding	0.667	0	0.064	0.294
ENSSSCG00000002774	protein_coding	0.976	0.564	1.242	2.187
ENSSSCG00000002775	protein_coding	0	0	0	0.069
ENSSSCG00000002776	protein_coding	15.967	5.815	4.574	5.877
ENSSSCG00000002777	protein_coding	2.44	0.382	0.053	0.244
ENSSSCG00000002778	protein_coding	1.391	1.274	2.006	3.414
ENSSSCG00000002779	protein_coding	0.049	0.428	0.021	0.418
ENSSSCG00000002780	protein_coding	15.129	27.544	11.259	29.417
ENSSSCG00000002781	protein_coding	0	0.082	0.011	0.138
ENSSSCG00000002782	protein_coding	0.016	0	0.032	0.005
ENSSSCG00000002783	protein_coding	0.456	0.018	0.393	0.795
ENSSSCG00000002786	protein_coding	0.944	1.993	1.666	1.934
ENSSSCG00000002787	protein_coding	4.392	6.279	5.9	6.474
ENSSSCG00000002788	protein_coding	2.221	0.992	0.817	1.163
ENSSSCG00000002790	protein_coding	25.411	9.737	16.64	9.19
ENSSSCG00000002792	protein_coding	194.16	83.407	56.838	108.836
ENSSSCG00000002793	protein_coding	1.448	0.874	0.891	1.36
ENSSSCG00000002795	protein_coding	21.588	23.495	56.297	47.31
ENSSSCG00000002797	protein_coding	18.741	6.433	6.495	4.315
ENSSSCG00000002799	protein_coding	3.782	4.459	4.499	4.076
ENSSSCG00000002800	protein_coding	0.041	0	0.34	0.11
ENSSSCG00000002801	protein_coding	4.165	5.924	8.203	8.165
ENSSSCG00000002802	protein_coding	1.407	3.221	2.335	1.709
ENSSSCG00000002803	protein_coding	0.407	0.719	0.255	1.204
ENSSSCG00000002804	protein_coding	0.83	1.401	1.645	1.558
ENSSSCG00000002805	protein_coding	4.767	3.822	3.226	3.86
ENSSSCG00000002806	protein_coding	2.432	1.665	1.061	1.764
ENSSSCG00000002807	protein_coding	4.222	2.502	3.067	2.155
ENSSSCG00000002809	protein_coding	0	0	0	0.092
ENSSSCG00000002810	protein_coding	0	1.429	0	0.11
ENSSSCG00000002811	protein_coding	0.024	0.036	0.032	0.028
ENSSSCG00000002812	protein_coding	2.692	0.346	1.008	1.898
ENSSSCG00000002813	protein_coding	1.009	1.137	1.74	2.33
ENSSSCG00000002814	protein_coding	0.163	0.155	0.202	0.161
ENSSSCG00000002815	protein_coding	1.147	7.216	2.239	6.355
ENSSSCG00000002817	protein_coding	0	0.264	0.032	2.15
ENSSSCG00000002818	protein_coding	0.464	1.966	0.573	1.558
ENSSSCG00000002819	protein_coding	4.165	4.14	3.099	3.988
ENSSSCG00000002820	protein_coding	2.831	1.656	1.507	1.397
ENSSSCG00000002821	protein_coding	0	0.309	0.053	0.023
ENSSSCG00000002822	protein_coding	18.887	7.662	21.967	9.521
ENSSSCG00000002823	protein_coding	0.171	0.209	0.096	0.161
ENSSSCG00000002824	protein_coding	0.171	0.428	0.032	1.443
ENSSSCG00000002825	protein_coding	0.016	0.255	0.265	1.424
ENSSSCG00000002826	protein_coding	0.081	0.337	0.18	1.783
ENSSSCG00000002827	protein_coding	0.008	0.009	0.032	0.032
ENSSSCG00000002828	protein_coding	0.439	0.246	0.69	0.248
ENSSSCG00000002829	protein_coding	25.142	19.491	35.731	45.844
ENSSSCG00000002830	protein_coding	0.081	0.036	0.032	0.009
ENSSSCG00000002831	protein_coding	0.122	0	0.106	0.124
ENSSSCG00000002834	protein_coding	0	0	0	0.051
ENSSSCG00000002835	protein_coding	0.041	0.155	0.011	0.041
ENSSSCG00000002836	protein_coding	0.033	0.018	0.085	0.124
ENSSSCG00000002837	protein_coding	2.774	3.321	2.611	1.829
ENSSSCG00000002838	protein_coding	0.756	0.955	0.69	1.594
ENSSSCG00000002839	protein_coding	0	0	0.021	0
ENSSSCG00000002841	protein_coding	1.383	0.883	2.95	1.434
ENSSSCG00000002843	protein_coding	7.402	2.866	2.366	3.823
ENSSSCG00000002844	protein_coding	6.32	3.285	2.759	2.642
ENSSSCG00000002846	protein_coding	10.412	8.754	7.715	8.905
ENSSSCG00000002847	protein_coding	12.502	9.991	2.133	7.494
ENSSSCG00000002849	protein_coding	0.626	0.81	0.562	1.149
ENSSSCG00000002850	protein_coding	1.594	3.467	0.499	3.428
ENSSSCG00000002852	protein_coding	2.408	2.939	6.622	9.535
ENSSSCG00000002853	protein_coding	3.994	1.683	6.399	4.958
ENSSSCG00000002854	protein_coding	3.571	5.514	4.531	3.667
ENSSSCG00000002855	protein_coding	0.667	2.657	0.679	1.071
ENSSSCG00000002857	protein_coding	0.171	0.055	0.18	0.542
ENSSSCG00000002859	protein_coding	1.204	1.401	2.504	2.178
ENSSSCG00000002860	protein_coding	3.49	3.258	5.136	6.92
ENSSSCG00000002861	protein_coding	1.936	2.329	3.205	2.982
ENSSSCG00000002863	protein_coding	0.399	0.4	2.441	2.895
ENSSSCG00000002864	protein_coding	0.065	0.328	0.138	0.156
ENSSSCG00000002865	protein_coding	0.309	0.555	0.424	1.443
ENSSSCG00000002866	protein_coding	0.033	0	0.17	0.188
ENSSSCG00000002867	protein_coding	1.326	1.474	5.104	4.149
ENSSSCG00000002868	protein_coding	12.64	5.451	21.691	15.922
ENSSSCG00000002869	protein_coding	27.981	27.099	38.49	37.495
ENSSSCG00000002872	protein_coding	1.741	1.183	2.175	2.739
ENSSSCG00000002873	protein_coding	38.653	17.853	23.665	22.538
ENSSSCG00000002875	protein_coding	0.7	1.856	1.316	1.434
ENSSSCG00000002876	protein_coding	9.875	8.208	6.686	7.963
ENSSSCG00000002877	protein_coding	1.114	0.983	1.284	1.415
ENSSSCG00000002879	protein_coding	2.985	2.193	5.879	6.598
ENSSSCG00000002880	protein_coding	0.586	0.391	0.679	0.675
ENSSSCG00000002881	protein_coding	0.081	0	0.403	0.23
ENSSSCG00000002882	protein_coding	0	0.109	0.021	0
ENSSSCG00000002883	protein_coding	0	0.018	0.096	0.28
ENSSSCG00000002884	protein_coding	0.716	0.355	1.146	3.014
ENSSSCG00000002885	protein_coding	7.833	5.305	7.248	7.481
ENSSSCG00000002886	protein_coding	0	0	0.053	0
ENSSSCG00000002887	protein_coding	0.008	0.009	0	0.133
ENSSSCG00000002888	protein_coding	0.952	1.31	0.987	2.192
ENSSSCG00000002889	protein_coding	3.311	1.228	49.272	1.806
ENSSSCG00000002891	protein_coding	0	0	0.011	0
ENSSSCG00000002893	protein_coding	1.7	3.54	0.722	1.31
ENSSSCG00000002895	protein_coding	0.545	0.719	1.114	1.682
ENSSSCG00000002896	protein_coding	7.736	7.434	13.435	6.86
ENSSSCG00000002898	protein_coding	0.984	0.965	1.624	1.241
ENSSSCG00000002900	protein_coding	0.293	0.692	0.318	1.14
ENSSSCG00000002901	protein_coding	0	0	0.042	0.064
ENSSSCG00000002902	protein_coding	0.195	0.018	0.202	0.271
ENSSSCG00000002903	protein_coding	1.407	0	0.276	1.411
ENSSSCG00000002904	protein_coding	1.358	2.985	2.568	2.941
ENSSSCG00000002905	protein_coding	6.328	6.333	13.127	11.722
ENSSSCG00000002906	protein_coding	1.464	0.018	1.677	1.015
ENSSSCG00000002907	protein_coding	63.584	55.389	41.037	23.319
ENSSSCG00000002908	protein_coding	0.065	0.173	0.042	0.037
ENSSSCG00000002910	protein_coding	1.92	0.883	1.082	2.794
ENSSSCG00000002914	protein_coding	0.285	0.582	0	0
ENSSSCG00000002915	protein_coding	1.635	0.227	0.074	0.078
ENSSSCG00000002916	protein_coding	3.229	7.962	11.811	21.941
ENSSSCG00000002917	protein_coding	0.846	2.484	1.73	2.15
ENSSSCG00000002918	protein_coding	5.011	5.897	1.167	1.126
ENSSSCG00000002919	protein_coding	31.121	22.112	34.701	17.498
ENSSSCG00000002921	protein_coding	0.797	1.556	1.093	3.037
ENSSSCG00000002922	protein_coding	0.22	0.473	1.093	1.245
ENSSSCG00000002923	protein_coding	0.236	0.773	0.403	0.597
ENSSSCG00000002925	protein_coding	7.833	6.998	13.498	7.035
ENSSSCG00000002926	protein_coding	10.826	16.67	13.488	14.943
ENSSSCG00000002927	protein_coding	0.049	0	0.064	0.271
ENSSSCG00000002929	protein_coding	0.016	0	0.138	0.101
ENSSSCG00000002930	protein_coding	2.961	3.858	2.451	3.832
ENSSSCG00000002931	protein_coding	0.342	1.756	0.934	0.813
ENSSSCG00000002932	protein_coding	0.708	1.92	1.22	1.985
ENSSSCG00000002933	protein_coding	1.724	1.429	0.753	1.052
ENSSSCG00000002935	protein_coding	0.895	1.046	1.602	2.086
ENSSSCG00000002936	protein_coding	0.87	2.511	1.327	1.994
ENSSSCG00000002937	protein_coding	0.545	1.274	0.764	1.002
ENSSSCG00000002938	protein_coding	0.773	0.664	1.072	1.31
ENSSSCG00000002941	protein_coding	0.724	0	6.144	1.089
ENSSSCG00000002944	protein_coding	0	0.127	0	0
ENSSSCG00000002950	protein_coding	0.399	0.591	0.7	1.057
ENSSSCG00000002952	protein_coding	0.805	1.52	2.292	2.279
ENSSSCG00000002953	protein_coding	8.224	25.706	53.262	70.767
ENSSSCG00000002954	protein_coding	9.858	10.01	5.37	21.514
ENSSSCG00000002955	protein_coding	0.399	0.373	0.69	1.025
ENSSSCG00000002956	protein_coding	16.48	14.942	13.562	10.803
ENSSSCG00000002957	protein_coding	0	0.045	0.414	0.414
ENSSSCG00000002959	protein_coding	4.051	1.046	5.603	3.001
ENSSSCG00000002960	protein_coding	0.399	0.118	0.531	0.781
ENSSSCG00000002961	protein_coding	0.008	0.045	0.042	0.032
ENSSSCG00000002962	protein_coding	0.935	0.628	0.488	0.478
ENSSSCG00000002963	protein_coding	47.202	103.235	81.447	78.041
ENSSSCG00000002965	protein_coding	21.303	10.182	28.207	36.158
ENSSSCG00000002967	protein_coding	0.008	0.045	0.096	0.087
ENSSSCG00000002968	protein_coding	0	0	0.021	0
ENSSSCG00000002969	protein_coding	0	0	0.138	0.427
ENSSSCG00000002971	protein_coding	0.057	0	0.042	0.014
ENSSSCG00000002972	protein_coding	0.407	0.146	1.528	1.59
ENSSSCG00000002977	protein_coding	0	0	0.138	0.129
ENSSSCG00000002978	protein_coding	0	0	0.17	0.63
ENSSSCG00000002980	protein_coding	0.822	0	0.085	0.129
ENSSSCG00000002981	protein_coding	0.033	0	0.053	19.997
ENSSSCG00000002983	protein_coding	0	0	0.032	0
ENSSSCG00000002984	protein_coding	0	0	0.074	0
ENSSSCG00000002986	protein_coding	0.089	0	0.011	0.074
ENSSSCG00000002987	protein_coding	2.286	0.409	0.361	0.032
ENSSSCG00000002988	protein_coding	0.521	0.719	0.615	0.68
ENSSSCG00000002989	protein_coding	38.214	32.422	42.65	31.907
ENSSSCG00000002990	protein_coding	0	0	0.042	0.078
ENSSSCG00000002991	protein_coding	0.033	0.027	0.106	0.404
ENSSSCG00000002993	protein_coding	0.333	0.637	1.273	2.017
ENSSSCG00000002994	protein_coding	0.081	0	0.255	0.501
ENSSSCG00000002995	protein_coding	10.647	6.379	19.08	16.969
ENSSSCG00000002996	protein_coding	4.197	2.311	9.965	9.199
ENSSSCG00000002997	protein_coding	0	0	0.34	0
ENSSSCG00000002998	protein_coding	1.301	3.685	3.64	8.202
ENSSSCG00000002999	protein_coding	0.407	0.664	0.913	1.902
ENSSSCG00000003000	protein_coding	1	1.574	1.687	2.082
ENSSSCG00000003005	protein_coding	10.192	19.482	31.221	19.547
ENSSSCG00000003006	protein_coding	0.293	0.073	1.21	3.01
ENSSSCG00000003007	protein_coding	7.345	3.603	7.577	7.003
ENSSSCG00000003013	protein_coding	4.295	5.087	3.651	4.158
ENSSSCG00000003014	protein_coding	0.927	0.528	1.422	1.673
ENSSSCG00000003015	protein_coding	1.822	2.211	1.422	1.898
ENSSSCG00000003016	protein_coding	0.781	0.719	2.069	2.242
ENSSSCG00000003017	protein_coding	1.423	1.474	1.772	2.316
ENSSSCG00000003018	protein_coding	0.464	0.255	0.711	1.002
ENSSSCG00000003021	protein_coding	0.537	0.382	1.305	1.627
ENSSSCG00000003022	protein_coding	0.016	0.073	0.117	0.096
ENSSSCG00000003024	protein_coding	0.39	0.682	0.424	0.565
ENSSSCG00000003030	protein_coding	0.838	0.682	1.762	3.887
ENSSSCG00000003035	protein_coding	4.864	5.369	3.141	4.43
ENSSSCG00000003038	protein_coding	0.236	0.619	0.446	1.126
ENSSSCG00000003039	protein_coding	0.464	0.446	0.647	1.709
ENSSSCG00000003040	protein_coding	1.383	0.928	2.982	3.171
ENSSSCG00000003041	protein_coding	0.155	0.419	0.594	0.602
ENSSSCG00000003042	protein_coding	43.127	109.359	96.017	47.273
ENSSSCG00000003043	protein_coding	0	0.337	0.032	0.018
ENSSSCG00000003044	protein_coding	2.359	0.582	0.233	0.119
ENSSSCG00000003045	protein_coding	0.049	0.2	0.021	0.041
ENSSSCG00000003046	protein_coding	31.674	22.713	111.256	67.39
ENSSSCG00000003047	protein_coding	0	0.446	0.987	0.142
ENSSSCG00000003048	protein_coding	0	0.127	0.011	2.573
ENSSSCG00000003049	protein_coding	0.512	0	0.085	0.561
ENSSSCG00000003051	protein_coding	0	0.246	0.074	0.074
ENSSSCG00000003052	protein_coding	0	0	0.021	0
ENSSSCG00000003053	protein_coding	0.122	0	7.46	0
ENSSSCG00000003054	protein_coding	0.309	0.437	0.117	0.303
ENSSSCG00000003055	protein_coding	3.018	3.74	3.937	6.782
ENSSSCG00000003058	protein_coding	7.736	13.813	13.817	13.155
ENSSSCG00000003059	protein_coding	6.385	13.995	12.703	13.633
ENSSSCG00000003061	protein_coding	4.588	3.167	3.746	3.244
ENSSSCG00000003062	protein_coding	0.155	0.227	0.042	0.037
ENSSSCG00000003063	protein_coding	1.334	0.655	1.358	0.979
ENSSSCG00000003064	protein_coding	68.058	36.735	21.404	17.649
ENSSSCG00000003065	protein_coding	7.044	2.493	7.906	4.246
ENSSSCG00000003066	protein_coding	0	0	0.042	0.046
ENSSSCG00000003067	protein_coding	0	0.446	0.191	0.391
ENSSSCG00000003068	protein_coding	0.512	0.4	1.082	1.36
ENSSSCG00000003069	protein_coding	0	0	0.032	0.046
ENSSSCG00000003070	protein_coding	1.367	2.166	1.645	1.719
ENSSSCG00000003071	protein_coding	0.211	0.419	0.18	0.202
ENSSSCG00000003072	protein_coding	1.009	0.746	1.295	1.443
ENSSSCG00000003073	protein_coding	0	0	1.931	0
ENSSSCG00000003076	protein_coding	0.659	1.292	1.348	1.957
ENSSSCG00000003077	protein_coding	0.48	0.373	0.828	1.048
ENSSSCG00000003078	protein_coding	0	0.491	0	0.221
ENSSSCG00000003079	protein_coding	3.921	0.209	3.353	1.957
ENSSSCG00000003080	protein_coding	1.521	0	0.265	1.783
ENSSSCG00000003081	protein_coding	0.203	0	0.021	0.055
ENSSSCG00000003083	protein_coding	0	0	0	0.207
ENSSSCG00000003085	protein_coding	3.481	3.876	3.746	5.712
ENSSSCG00000003086	protein_coding	0.065	0.318	0.053	0
ENSSSCG00000003087	protein_coding	0.301	1.547	0.117	0
ENSSSCG00000003088	protein_coding	7.931	7.134	93.757	65.887
ENSSSCG00000003089	protein_coding	12.079	4.186	8.925	10.27
ENSSSCG00000003090	protein_coding	10.119	3.412	13.477	19.717
ENSSSCG00000003091	protein_coding	1.928	2.066	4.712	6.254
ENSSSCG00000003092	protein_coding	0	0	0.064	0.161
ENSSSCG00000003093	protein_coding	0.797	1.092	1.464	1.682
ENSSSCG00000003095	protein_coding	0.114	0.164	0.042	0.096
ENSSSCG00000003097	protein_coding	0.098	0.1	0.424	0.372
ENSSSCG00000003098	protein_coding	3.083	3.085	6.219	6.277
ENSSSCG00000003099	protein_coding	0.049	0.355	0.403	0.602
ENSSSCG00000003100	protein_coding	1.887	0.355	2.918	3.212
ENSSSCG00000003101	protein_coding	0.024	0.164	0.488	1.503
ENSSSCG00000003102	protein_coding	0.171	0.264	0.329	1.383
ENSSSCG00000003103	protein_coding	0.415	0.473	1.008	1.411
ENSSSCG00000003104	protein_coding	7.491	6.752	15.037	13.794
ENSSSCG00000003105	protein_coding	3.799	1.456	4.128	5.79
ENSSSCG00000003106	protein_coding	18.546	12.585	24.896	16.657
ENSSSCG00000003107	protein_coding	3.278	2.912	2.621	4.342
ENSSSCG00000003108	protein_coding	0.065	0	0.191	0.152
ENSSSCG00000003109	protein_coding	1.716	5.442	0.998	0.983
ENSSSCG00000003110	protein_coding	0.992	3.267	2.059	3.662
ENSSSCG00000003111	protein_coding	6.532	8.381	8.766	7.936
ENSSSCG00000003112	protein_coding	0.114	0	0.562	0.777
ENSSSCG00000003113	protein_coding	1.423	1.465	2.069	3.584
ENSSSCG00000003114	protein_coding	1.285	1.292	2.971	4.076
ENSSSCG00000003115	protein_coding	1.741	4.504	2.324	2.224
ENSSSCG00000003119	protein_coding	0.024	0.1	0.106	0.078
ENSSSCG00000003120	protein_coding	5.385	3.23	5.168	7.2
ENSSSCG00000003121	protein_coding	0.553	0.91	1.496	1.346
ENSSSCG00000003123	protein_coding	0	0	0	1.526
ENSSSCG00000003125	protein_coding	0	0	0	0.009
ENSSSCG00000003126	protein_coding	0	0	0.042	0.055
ENSSSCG00000003128	protein_coding	0.74	2.148	2.611	3.984
ENSSSCG00000003129	protein_coding	0.016	0	0.042	0.262
ENSSSCG00000003130	protein_coding	0.024	0.4	0.127	0.391
ENSSSCG00000003131	protein_coding	0	0.4	0.127	0.096
ENSSSCG00000003132	protein_coding	8.549	8.79	6.877	6.722
ENSSSCG00000003133	protein_coding	0.098	0	0.096	0.092
ENSSSCG00000003134	protein_coding	1.375	1.729	3.523	3.281
ENSSSCG00000003135	protein_coding	0.016	0	0.032	0.106
ENSSSCG00000003136	protein_coding	2.717	4.341	5.571	5.928
ENSSSCG00000003137	protein_coding	1.651	0.773	54.631	2.596
ENSSSCG00000003138	protein_coding	15.105	5.15	7.672	12.094
ENSSSCG00000003139	protein_coding	20.783	5.214	3.014	5.771
ENSSSCG00000003140	protein_coding	0	0	0.244	0.064
ENSSSCG00000003141	protein_coding	6.8	3.858	4.775	4.112
ENSSSCG00000003142	protein_coding	0.244	0.965	0.594	0.469
ENSSSCG00000003143	protein_coding	0.846	0.464	0.584	0.795
ENSSSCG00000003144	protein_coding	6.955	4.595	5.083	5.482
ENSSSCG00000003145	protein_coding	0.016	0	0.403	2.789
ENSSSCG00000003146	protein_coding	0.325	0.009	0.287	0.377
ENSSSCG00000003147	protein_coding	1.009	1.42	3.842	4.034
ENSSSCG00000003148	protein_coding	0.813	0.965	1.167	2.366
ENSSSCG00000003149	protein_coding	0	0.227	0.074	0.074
ENSSSCG00000003150	protein_coding	21.751	15.406	18.741	30.299
ENSSSCG00000003151	protein_coding	0.089	0	1.189	5.702
ENSSSCG00000003152	protein_coding	6.328	7.926	10.761	15.356
ENSSSCG00000003153	protein_coding	1857.85	1131.13	830.57	548.304
ENSSSCG00000003154	protein_coding	7.939	5.487	3.905	3.262
ENSSSCG00000003155	protein_coding	7.817	19.701	18.709	16.818
ENSSSCG00000003156	protein_coding	0.748	0.446	0.7	1.075
ENSSSCG00000003157	protein_coding	3.156	2.885	3.513	5.349
ENSSSCG00000003158	protein_coding	17.627	6.133	4.68	13.665
ENSSSCG00000003159	protein_coding	0	0.036	0.011	0.046
ENSSSCG00000003160	protein_coding	0.447	0.009	0.371	0.538
ENSSSCG00000003161	protein_coding	0.887	0.692	0.796	0.813
ENSSSCG00000003165	protein_coding	108.687	306.793	246.687	144.576
ENSSSCG00000003166	protein_coding	363.503	417.735	895.887	468.09
ENSSSCG00000003167	protein_coding	1.643	0.073	11.79	4.227
[truncated: 18,359 more rows]

## Sheet: Identified miRNA
Identified miRNA in four samples
miRNA ID	YP-1	YP-2	OY-1	OY-2
ssc-miR-99b	5478.78	10502.6	16049	16513.6
ssc-miR-99a	244048	1.16138e+06	1.62669e+06	2.26177e+06
ssc-miR-9860-5p	31.405	44.323	38.404	26.7
ssc-miR-9858-5p	4.038	0	2.649	1.271
ssc-miR-9851-3p	113.954	205.916	101.97	141.131
ssc-miR-9843-3p	15.254	25.855	41.053	39.415
ssc-miR-9841-3p	20.189	29.548	119.185	105.53
ssc-miR-9831-3p	0.449	0	0	0
ssc-miR-9820-5p	22.432	12.004	105.943	8.9
ssc-miR-9811-5p	0	0	0	1.271
ssc-miR-9810-3p	0.897	0.923	11.919	3.814
ssc-miR-98	1643.81	2232.75	3386.19	2246.65
ssc-miR-9788-3p	20.637	44.323	34.431	15.257
ssc-miR-9785-5p	1.795	1.847	22.513	12.715
ssc-miR-96-5p	113.057	19.391	43.701	47.044
ssc-miR-95	282.194	278.863	879.323	1205.34
ssc-miR-935	3.14	8.311	3.973	8.9
ssc-miR-92b-5p	6.73	19.391	38.404	150.031
ssc-miR-92b-3p	154.332	388.747	1122.99	4589.94
ssc-miR-92a	19291.5	51662.7	155726	147849
ssc-miR-9-2	604.316	739.635	874.026	7113.77
ssc-miR-9-1	604.316	739.635	874.026	7113.77
ssc-miR-9	604.316	739.635	874.026	7113.77
ssc-miR-885-5p	1.795	2.77	2.649	155.117
ssc-miR-885-3p	6.73	5.54	0	47.044
ssc-miR-874	1042.19	3632.61	1656.68	2265.72
ssc-miR-7857-3p	672.061	12.927	14.567	10.172
ssc-miR-769-5p	1494.42	2047.15	1336.2	1928.79
ssc-miR-769-3p	200.542	372.126	141.698	219.961
ssc-miR-758	636.618	136.662	203.939	419.579
ssc-miR-744	3344.6	4146.94	2138.72	2682.76
ssc-miR-7144-5p	31.405	56.327	37.08	35.601
ssc-miR-7144-3p	0.449	0	0	0
ssc-miR-7143-5p	0.449	0	0	0
ssc-miR-7143-3p	5.384	0.923	0	3.814
ssc-miR-7142-5p	0.449	0.923	1.324	0
ssc-miR-7142-3p	122.927	174.521	124.483	132.231
ssc-miR-7141-5p	0	0.923	0	0
ssc-miR-7140-5p	0	0	1.324	0
ssc-miR-7140-3p	104.084	33.242	45.026	30.515
ssc-miR-7139-5p	16.151	69.254	80.781	59.758
ssc-miR-7139-3p	12.113	31.395	18.54	11.443
ssc-miR-7138-5p	0	0	13.243	16.529
ssc-miR-7138-3p	0	0	3.973	0
ssc-miR-7137-5p	79.858	105.266	137.725	120.788
ssc-miR-7137-3p	12.562	17.544	14.567	12.715
ssc-miR-7136-5p	5.384	5.54	5.297	1.271
ssc-miR-7136-3p	0.449	4.617	0	3.814
ssc-miR-7135-5p	0.449	0	3.973	0
ssc-miR-7135-3p	1.795	1.847	2.649	0
ssc-miR-7134-5p	124.273	241.005	723.058	826.443
ssc-miR-7134-3p	6162.95	10483.2	14700.9	18930.6
ssc-miR-708-5p	6564.93	6670.56	5090.54	4876.01
ssc-miR-708-3p	37.237	102.496	132.428	185.632
ssc-miR-7	2242.3	2479.3	2377.09	2701.83
ssc-miR-6782-3p	124.722	12.004	17.216	7.629
ssc-miR-676-5p	8.973	29.548	18.54	10.172
ssc-miR-676-3p	5057.95	18360.7	13428.2	10125.8
ssc-miR-671-5p	170.034	174.521	115.213	77.558
ssc-miR-671-3p	173.623	188.371	165.535	185.632
ssc-miR-664-5p	274.118	564.191	576.063	704.384
ssc-miR-664-3p	4.935	4.617	58.268	54.672
ssc-miR-652	0.449	0.923	2.649	0
ssc-miR-628	61.015	54.48	149.644	120.788
ssc-miR-615	100.944	144.049	164.211	156.388
ssc-miR-582	2.692	3.694	0	2.543
ssc-miR-574	1450	4035.21	17978.5	15457
ssc-miR-551a	27.816	25.855	15.891	16.529
ssc-miR-545-5p	51.145	59.097	35.756	52.129
ssc-miR-545-3p	2.243	1.847	5.297	7.629
ssc-miR-542-5p	3900.02	1548.52	938.916	863.315
ssc-miR-542-3p	2050.28	1165.32	642.277	423.393
ssc-miR-532-5p	9516.08	5516.32	4719.74	5869.02
ssc-miR-532-3p	723.654	372.126	866.081	678.955
ssc-miR-505	415.888	677.767	654.195	649.711
ssc-miR-504	763.135	2388.81	9471.27	9443.06
ssc-miR-503	1147.62	450.614	268.829	171.646
ssc-miR-500	2094.7	665.763	770.732	602.668
ssc-miR-499-5p	213.103	187.448	161.562	164.017
ssc-miR-499-3p	0	0.923	0	0
ssc-miR-497	12518.8	32158.9	35815.2	46043
ssc-miR-493-5p	17.946	4.617	22.513	36.872
ssc-miR-493-3p	13.908	2.77	13.243	10.172
ssc-miR-491	543.75	547.57	451.58	752.699
ssc-miR-490-5p	3.589	3.694	0	2.543
ssc-miR-490-3p	131.003	142.202	50.323	132.231
ssc-miR-490	131.003	142.202	50.323	132.231
ssc-miR-489	0.449	1.847	3.973	10.172
ssc-miR-487b	1.795	0	1.324	3.814
ssc-miR-486	550.928	696.235	1424.93	2563.24
ssc-miR-455-5p	322.123	568.808	515.146	520.023
ssc-miR-455-3p	2817.9	6283.66	9832.8	8497.1
ssc-miR-452	2266.97	1044.35	380.069	198.346
ssc-miR-451	5524.09	4057.37	6475.74	11443.1
ssc-miR-450c-5p	2112.64	953.861	491.309	544.181
ssc-miR-450c-3p	182.147	109.883	80.781	40.686
ssc-miR-450b-5p	418.58	242.851	499.254	170.374
ssc-miR-450b-3p	12.562	4.617	7.946	3.814
ssc-miR-450a	1091.54	575.271	323.125	376.349
ssc-miR-4338	2.692	0.923	1.324	2.543
ssc-miR-4334-3p	733.524	1279.82	1085.91	2636.99
ssc-miR-4332	131.9	45.246	195.994	375.078
ssc-miR-4331	9.87	6.464	13.243	25.429
ssc-miR-432-5p	334.236	62.79	154.941	175.46
ssc-miR-429	21.983	23.085	45.026	260.647
ssc-miR-425-5p	27013	18018.1	10042	12261.9
ssc-miR-425-3p	1029.63	912.308	917.728	1020.98
ssc-miR-424-5p	52519	34458.1	23555	18460.2
ssc-miR-424-3p	421.72	310.259	425.095	325.491
ssc-miR-423-5p	3959.24	8892.24	9345.46	8486.93
ssc-miR-423-3p	4954.77	8446.24	7507.36	6539.07
ssc-miR-421-5p	9.87	16.621	19.864	27.972
ssc-miR-421-3p	68.642	75.718	100.645	78.83
ssc-miR-411	127.862	29.548	120.51	127.145
ssc-miR-383	0.897	0	0	0
ssc-miR-382	320.777	98.803	148.32	199.618
ssc-miR-381	14.805	6.464	11.919	33.058
ssc-miR-378b-3p	320.777	334.267	463.499	650.983
ssc-miR-378	21213	21662.7	26655.2	31825.7
ssc-miR-376c	1.795	0	0	5.086
ssc-miR-376a-5p	4.935	0.923	2.649	1.271
ssc-miR-376a-3p	4.935	0.923	1.324	3.814
ssc-miR-374b-5p	468.828	555.88	1881.81	1481.24
ssc-miR-374b-3p	4.486	2.77	6.621	2.543
ssc-miR-374a-5p	2029.64	2914.22	6459.85	5235.83
ssc-miR-374a-3p	60.566	77.565	119.185	100.445
ssc-miR-371-5p	5.384	73.871	246.316	167.831
ssc-miR-370	167.791	101.573	124.483	181.817
ssc-miR-369	257.519	49.863	148.32	106.802
ssc-miR-365-5p	11.216	18.468	21.189	19.072
ssc-miR-365-3p	1279.97	535.566	2720.08	1881.75
ssc-miR-363	341.863	319.493	267.505	183.089
ssc-miR-362	4587.33	1982.52	1548.09	2068.65
ssc-miR-361-5p	7822.47	11621.8	15327.2	16162.7
ssc-miR-361-3p	1353.54	2156.11	2203.61	2762.86
ssc-miR-3613	0.449	1.847	1.324	1.271
ssc-miR-34c	131.9	969.558	121.834	5973.27
ssc-miR-34a	6068.74	1681.49	1349.44	1586.77
ssc-miR-345-5p	82.55	77.565	52.971	124.602
ssc-miR-345-3p	427.104	371.202	180.102	213.604
ssc-miR-342	1304.64	2279.85	4102.63	3726.62
ssc-miR-340	133.694	166.21	113.888	162.746
ssc-miR-339-5p	7301.6	12063.2	16745.5	21121.3
ssc-miR-339-3p	16.6	27.702	48.998	50.858
ssc-miR-339	11823	19779	28236.3	37318.3
ssc-miR-338	12.562	84.028	75.484	391.607
ssc-miR-335	59.669	96.956	135.077	20.343
ssc-miR-331-5p	204.579	342.577	389.339	419.579
ssc-miR-331-3p	886.51	1005.57	1134.91	1366.81
ssc-miR-328	1471.98	1420.17	3175.63	3290.51
ssc-miR-326	76.269	100.649	84.754	116.973
ssc-miR-324	815.625	739.635	308.558	375.078
ssc-miR-323	203.682	64.637	192.021	279.719
ssc-miR-320	21446.3	69094.4	91346.3	110722
ssc-miR-32	38.583	22.161	33.107	8.9
ssc-miR-31	14061.7	30700.8	20425.7	10672.6
ssc-miR-30e-5p	2729.52	5999.26	5230.91	7084.52
ssc-miR-30e-3p	1283.56	2766.47	6375.1	6432.27
ssc-miR-30d	30429.4	28149.5	33707	41933.7
ssc-miR-30c-5p	10183.2	21423.5	42659.1	47572.6
ssc-miR-30c-3p	54.734	118.194	154.941	209.789
ssc-miR-30c-1-3p	30.059	94.186	108.591	101.716
ssc-miR-30b-5p	2830.01	2815.41	5320.97	4765.4
ssc-miR-30b-3p	44.864	66.484	91.375	58.487
ssc-miR-30a-5p	4281.81	9255.13	7700.7	11974.5
ssc-miR-30a-3p	318.534	542.953	1246.15	1588.04
ssc-miR-29c	6489.56	13151.8	29581.8	41926.1
ssc-miR-29b	1742.51	2767.4	7299.44	6378.87
ssc-miR-29a	47180.7	136225	257444	326022
ssc-miR-299	281.745	99.726	926.998	1355.37
ssc-miR-296-5p	187.082	291.791	353.583	506.037
ssc-miR-296-3p	1431.61	3040.72	1757.32	1926.25
ssc-miR-28-5p	626.748	915.078	1440.82	1013.35
ssc-miR-28-3p	4251.75	8976.26	15894	15230.7
ssc-miR-27b-5p	133.694	207.763	112.564	101.716
ssc-miR-27b-3p	26378.6	34895.8	43081.6	36499.5
ssc-miR-27a	1444.62	1168.09	2306.9	2359.81
ssc-miR-26a	132469	366520	708510	795308
ssc-miR-2483	143.564	344.424	107.267	105.53
ssc-miR-24-3p	72826.6	86928.8	95919.1	90771.4
ssc-miR-24-2-5p	9.87	10.157	7.946	12.715
ssc-miR-24-1-5p	49.35	34.165	23.837	45.772
ssc-miR-2411	5.384	8.311	10.594	6.357
ssc-miR-23b	18946.5	26364.6	44029.7	34402.9
ssc-miR-23a	12225.4	13047.5	30347.3	33543.4
ssc-miR-2366	3718.32	1137.62	903.16	386.521
ssc-miR-2320-5p	2345.48	2672.29	1828.83	2237.75
ssc-miR-2320-3p	42.621	45.246	43.701	40.686
ssc-miR-22-5p	406.915	153.283	280.748	198.346
ssc-miR-224	766.724	181.908	259.559	114.431
ssc-miR-22-3p	11019.5	5663.14	6782.97	5833.41
ssc-miR-222	2962.81	1336.14	2513.49	1827.07
ssc-miR-221-5p	274.567	144.049	238.371	200.889
ssc-miR-221-3p	9746.68	5846.9	8047.66	7806.71
ssc-miR-219b-3p	30.956	14.774	6.621	7.629
ssc-miR-219a	4.935	17.544	21.189	19.072
ssc-miR-218b	18197.2	4220.81	3138.55	3627.45
ssc-miR-218-5p	18197.2	4220.81	3138.55	3627.45
ssc-miR-218-3p	0.897	1.847	0	0
ssc-miR-218	18197.2	4220.81	3138.55	3627.45
ssc-miR-217	8.973	1.847	10.594	66.115
ssc-miR-216	1.795	1.847	0	170.374
ssc-miR-215	3.589	4.617	2.649	10.172
ssc-miR-214	8482.41	22019.1	43008.7	25703.6
ssc-miR-212	1286.7	344.424	3044.53	414.493
ssc-miR-210	225.665	873.526	1013.08	1729.17
ssc-miR-21	312488	84516.9	212512	82178.9
ssc-miR-20b	70.885	46.169	39.728	17.8
ssc-miR-20a	1253.05	2615.04	2265.85	2279.71
ssc-miR-206	271.875	1939.12	1185.23	607.753
ssc-miR-205	325.263	1103.45	1168.02	962.488
ssc-miR-204	870.359	723.937	2301.6	1472.34
ssc-miR-202-5p	1039.5	1771.06	1663.3	385.249
ssc-miR-202-3p	3528.99	10243.2	1748.05	855.686
ssc-miR-19b	4033.26	10740.9	10912.1	11499
ssc-miR-19a	133.246	323.186	346.962	450.093
ssc-miR-199b-5p	5821.99	16695.8	18994.2	27362.9
ssc-miR-199b-3p	60555	239528	427010	405686
ssc-miR-199a-5p	166221	527986	575332	590718
ssc-miR-199a-3p	121208	479424	855506	812447
ssc-miR-196b-5p	11.665	2195.82	60.917	147.488
ssc-miR-196a	0.897	346.271	6.621	34.329
ssc-miR-195	17585.7	38760.2	123197	94846.4
ssc-miR-194b-5p	7.178	7.387	7.946	8.9
ssc-miR-194a	371.024	313.952	390.663	699.298
ssc-miR-193a-5p	1774.82	3528.27	7120.67	7364.24
ssc-miR-193a-3p	39.032	115.424	143.022	269.548
ssc-miR-192	194.261	122.811	172.157	344.563
ssc-miR-191	24698.5	30820.9	62775	47305.6
ssc-miR-190b	0.897	2.77	2.649	17.8
ssc-miR-190a	28.264	181.908	158.914	251.747
ssc-miR-18b	2.692	3.694	5.297	1.271
ssc-miR-18a	111.711	132.968	56.944	80.101
ssc-miR-187	84.793	279.787	166.86	259.376
ssc-miR-186	10303.4	18140.9	12976.6	12656
ssc-miR-185	8209.64	5441.53	2998.18	3701.19
ssc-miR-184	318.982	313.029	451.58	162.746
ssc-miR-1839-5p	62.361	21.238	7.946	13.986
ssc-miR-1839-3p	0.897	0	0	1.271
ssc-miR-183	505.167	123.734	315.179	137.317
ssc-miR-182	1099.61	362.892	818.406	306.42
ssc-miR-181d-5p	808.896	1933.58	1644.76	2222.49
ssc-miR-181d-3p	0	4.617	2.649	8.9
ssc-miR-181c	698.979	2820.03	3158.41	4461.52
ssc-miR-181b	24038.5	51533.4	50697.5	57356.4
ssc-miR-181a	73451.1	168302	162231	193142
ssc-miR-17-5p	414.542	903.998	674.06	539.095
ssc-miR-17-3p	50.696	141.279	74.16	141.131
ssc-miR-16	39747.2	58908.5	59125.2	52777.9
ssc-miR-15b	4491.32	7197.82	7092.86	5457.06
ssc-miR-15a	3175.47	3795.13	2034.1	1759.69
ssc-miR-155-5p	3328.45	2273.38	7331.23	4492.03
ssc-miR-155-3p	2.243	1.847	3.973	1.271
ssc-miR-153	1.346	1.847	1.324	293.705
ssc-miR-152	19007.5	31068.3	24872.7	23720.2
ssc-miR-151-5p	5359.89	7593.03	9987.74	9807.97
ssc-miR-151-3p	10320	16287.7	20686.6	25437.9
ssc-miR-150	1207.74	3433.16	5773.87	8963.73
ssc-miR-149	966.817	4712.05	5497.1	4664.95
ssc-miR-148b-5p	125.619	118.194	120.51	91.544
ssc-miR-148b-3p	5195.24	3113.67	3931.79	4155.1
ssc-miR-148a-5p	232.395	396.134	362.853	455.179
ssc-miR-148a-3p	6573.46	7409.27	11636.5	16675.1
ssc-miR-146b	664.434	225.307	562.82	288.619
ssc-miR-146a-5p	2195.19	6569.91	4020.52	2436.1
ssc-miR-146a-3p	0.449	0	0	0
ssc-miR-1468	995.978	1487.58	1679.19	1548.63
ssc-miR-145-5p	51308.1	177413	244775	302179
ssc-miR-145-3p	1085.71	3850.53	7768.24	2867.12
ssc-miR-144	23.778	18.468	25.161	199.618
ssc-miR-143-5p	145.808	261.319	233.074	256.833
ssc-miR-143-3p	189037	396617	530756	469791
ssc-miR-142-5p	652.769	504.17	652.871	437.379
ssc-miR-142-3p	518.626	458.924	345.638	443.736
ssc-miR-140-5p	1184.41	2669.52	3114.71	2982.82
ssc-miR-140-3p	65137.4	191508	249625	359454
ssc-miR-139-5p	887.408	868.909	900.512	771.77
ssc-miR-139-3p	431.591	395.21	243.668	267.005
ssc-miR-138	16.6	12.004	9.27	58.487
ssc-miR-137	14.356	27.702	9.27	246.661
ssc-miR-136	21.983	3.694	19.864	13.986
ssc-miR-135	1020.21	4483.98	3210.06	7137.92
ssc-miR-1343	3245.45	2475.61	2792.91	3780.02
ssc-miR-133b	9.421	36.936	144.347	100.445
ssc-miR-133a-5p	16.151	58.174	86.078	83.916
ssc-miR-133a-3p	413.645	1763.67	5299.78	5141.75
ssc-miR-132	1844.8	413.678	2946.53	310.234
ssc-miR-130b	1151.66	1937.27	933.619	1135.4
ssc-miR-130a	4066.91	11571.9	8366.82	11318.5
ssc-miR-1307	5308.74	4845.94	3069.69	3416.39
ssc-miR-1306-5p	522.216	682.384	1879.16	2513.66
ssc-miR-1306-3p	261.556	714.703	409.203	386.521
ssc-miR-129b	1757.77	150.512	736.301	1040.05
ssc-miR-129a-5p	1755.52	150.512	736.301	1038.78
ssc-miR-129a-3p	421.272	89.569	429.067	855.686
ssc-miR-1296-5p	150.743	230.847	256.911	279.719
ssc-miR-1285	3694.54	4016.74	1402.41	2612.83
ssc-miR-128	4645.21	10817.5	8009.26	8119.48
ssc-miR-1277	0	0	1.324	0
ssc-miR-1271	15.702	20.315	52.971	52.129
ssc-miR-127	8085.82	2129.34	3477.57	8734.86
ssc-miR-126-5p	7044.08	3289.11	5212.38	4366.16
ssc-miR-126-3p	56595.3	32647.3	39496.7	32758.9
ssc-miR-125b	412764	2.18954e+06	4.22944e+06	5.7595e+06
ssc-miR-125a	30666.7	98889.4	181433	196693
ssc-miR-124a	6.281	3.694	5.297	1027.33
ssc-miR-1249	298.793	81.258	476.742	650.983
ssc-miR-122	362.5	146.819	407.879	50.858
ssc-miR-10b	35094.3	58056.2	125755	103548
ssc-miR-10a-5p	2007.66	8357.59	10902.8	10886.2
ssc-miR-10a-3p	39.48	117.27	133.753	116.973
ssc-miR-107	11904.6	12779.7	9148.14	9403.65
ssc-miR-106a	6.281	9.234	10.594	6.357
ssc-miR-105-2	0.897	2.77	2.649	0
ssc-miR-105-1	4.038	16.621	29.134	22.886
ssc-miR-103	198506	165135	130107	121253
ssc-miR-101	10295.8	20659.9	35229.9	43374.3
ssc-miR-100	8413.32	29887.3	46372.4	52137.1
ssc-miR-1	99.149	602.973	2702.86	982.831
ssc-let-7i	13632.8	27156.9	29046.8	27862.6
ssc-let-7g	13634.1	23936.1	58441.9	40634.3
ssc-let-7f	93082.2	153982	180355	155954
ssc-let-7e	32329.8	78052.2	68313.1	69689.5
ssc-let-7d-5p	15203	26179.9	33701.7	25506.6
ssc-let-7d-3p	910.288	934.47	1888.43	1232.04
ssc-let-7c	80162.3	348288	487107	508233
ssc-let-7a	443885	783248	1.10667e+06	1.21987e+06
novel:X_32146	2.243	0	0	0
novel:X_32124	2.243	0.923	1.324	1.271
novel:X_32112	52.042	60.02	19.864	27.972
novel:X_32110	14.805	20.315	3.973	5.086
novel:X_32106	51.593	49.863	11.919	16.529
novel:X_32104	16.151	8.311	11.919	6.357
novel:X_32102	65.95	86.799	19.864	35.601
novel:X_32100	0.449	4.617	1.324	2.543
novel:X_32097	0.897	17.544	3.973	2.543
novel:X_32094	1.795	19.391	5.297	2.543
novel:X_32092	0.449	5.54	0	0
novel:X_32082	0	0	1.324	0
novel:X_32072	0.449	0	1.324	1.271
novel:X_32064	1.795	2.77	0	2.543
novel:X_32024	0.897	0	1.324	0
novel:X_31976	0	1.847	0	0
novel:X_31955	0	0	0	1.271
novel:X_31819	0.897	0	0	0
novel:X_31798	1.346	2.77	9.27	7.629
novel:X_31702	191.12	120.964	217.182	419.579
novel:X_31660	2.692	4.617	10.594	7.629
novel:X_31616	2.243	2.77	0	1.271
novel:X_31614	2.243	2.77	0	1.271
novel:X_31579	0	1.847	2.649	0
novel:X_31560	0.449	0	0	0
novel:X_31557	2.692	4.617	2.649	0
novel:X_31422	0	0	0	1.271
novel:X_31411	0	0.923	1.324	1.271
novel:X_31390	0	0	0	1.271
novel:X_31388	0	0	0	1.271
novel:X_31386	0	0	0	1.271
novel:X_31384	0	0	0	1.271
novel:X_31365	0	0.923	0	0
novel:X_31326	6.281	8.311	7.946	5.086
novel:X_31271	8.973	17.544	47.674	19.072
novel:X_31260	6.281	10.157	21.189	26.7
novel:X_31216	2.243	0	0	0
novel:X_31210	2.243	0	0	0
novel:X_31148	0.449	3.694	2.649	6.357
novel:X_31146	0.897	1.847	1.324	5.086
novel:X_31142	0.897	1.847	1.324	5.086
novel:X_31122	51.145	10.157	29.134	57.215
novel:X_31119	213.552	107.113	385.366	483.151
novel:MT_30930	0.449	0	0	1.271
novel:MT_30806	14.356	4.617	2.649	2.543
novel:JH118985.1_34048	65.95	22.161	82.105	20.343
novel:JH118966.1_32178	1.795	6.464	1.324	0
novel:JH118951.1_32181	3.14	4.617	1.324	1.271
novel:JH118939.1_32614	2.692	1.847	7.946	6.357
novel:JH118931.1_33546	0	0.923	0	1.271
novel:JH118928.1_32824	2.243	10.157	27.81	16.529
novel:JH118928.1_32822	2.243	10.157	10.594	21.615
novel:JH118901.1_32193	35.442	13.851	33.107	36.872
novel:JH118861.1_32501	7.178	0.923	17.216	3.814
novel:JH118800.1_32353	2.692	1.847	0	1.271
novel:JH118744.1_32924	8.075	0	0	6.357
novel:JH118729.1_32830	237.33	606.667	524.416	516.209
novel:JH118729.1_32829	132.348	260.396	215.858	200.889
novel:JH118696.1_34327	51.145	87.722	88.727	246.661
novel:JH118656.1_34816	43.518	155.129	150.968	169.103
novel:JH118655.1_34152	0.897	0.923	3.973	6.357
novel:JH118647.1_32459	5.832	1.847	6.621	3.814
novel:JH118620.1_32886	2.692	3.694	7.946	2.543
novel:JH118582.1_32218	0	0	1.324	0
novel:JH118529.1_33367	0.449	0	0	0
novel:JH118527.1_33311	2.243	2.77	1.324	1.271
novel:JH118523.1_32566	1.346	4.617	6.621	1.271
novel:JH118523.1_32565	0.897	4.617	6.621	0
novel:JH118494.1_33284	14.805	1.847	1.324	1.271
novel:JH118486.1_33645	3.589	6.464	13.243	6.357
novel:JH118486.1_33639	8.075	5.54	13.243	5.086
novel:JH118484.1_32712	1.346	0	0	0
novel:JH118484.1_32708	1.346	0	0	0
novel:JH118477.1_32667	0	0	0	3.814
novel:JH118475.1_32859	0.897	0	0	1.271
novel:JH118450.1_32200	0.449	2.77	0	2.543
novel:GL896538.1_34750	0	0.923	7.946	2.543
novel:GL896501.1_34780	20.637	16.621	3.973	0
novel:GL896485.1_35055	0.449	0.923	0	3.814
novel:GL896485.1_35051	2.243	3.694	9.27	1.271
novel:GL896454.1_34971	99.149	264.089	41.053	125.874
novel:GL896425.1_35129	33.199	13.851	29.134	24.158
novel:GL896307.1_34973	1.795	0	3.973	3.814
novel:GL896296.2_34578	10.319	25.855	35.756	24.158
novel:GL896292.1_34958	25.124	58.174	169.508	130.959
novel:GL896243.1_34886	2.243	0	2.649	1.271
novel:GL896231.1_34397	0	0.923	1.324	0
novel:GL896225.1_34615	0	0	0	2.543
novel:GL896219.1_34198	0.449	0	1.324	0
novel:GL895563.1_33349	0	0	1.324	1.271
novel:GL895502.2_33703	4.486	0	1.324	0
novel:GL895502.2_33702	294.307	81.258	297.964	1056.58
novel:GL895499.1_34770	3.14	0	3.973	5.086
novel:GL895364.2_34610	0	0	0	19.072
novel:GL895351.2_32413	1.795	0	1.324	1.271
novel:GL895308.2_32204	1.795	0.923	0	1.271
novel:GL895172.1_34192	20.637	28.625	10.594	24.158
novel:GL895129.1_34653	0.449	0	0	1.271
novel:GL895128.2_32947	0.449	0.923	1.324	0
novel:GL895036.1_34959	0.449	0	0	1.271
novel:GL894932.2_32651	6.281	6.464	1.324	6.357
novel:GL894932.2_32650	0.449	0	0	0
novel:GL894932.2_32649	0.449	0	0	0
novel:GL894932.2_32648	0.449	3.694	1.324	1.271
novel:GL894766.2_33883	0.449	0	0	0
novel:GL894677.1_32808	0	1.847	0	0
novel:GL894660.2_33757	90.625	24.932	206.588	147.488
novel:GL894542.2_34993	154.78	162.516	203.939	142.402
novel:GL894520.2_33580	8.075	7.387	0	1.271
novel:GL894441.2_33815	90.625	186.525	30.458	64.844
novel:GL894348.2_33961	0.897	0.923	0	0
novel:GL894329.1_33984	13.908	7.387	5.297	6.357
novel:GL894266.1_35018	0	1.847	1.324	0
novel:GL894237.1_34133	4.935	5.54	13.243	12.715
novel:GL894231.1_34508	26.918	7.387	33.107	24.158
novel:GL894231.1_34489	44.415	10.157	37.08	39.415
novel:GL894231.1_34477	8.075	1.847	2.649	3.814
novel:GL894094.2_32333	0.449	0	1.324	0
novel:GL894032.2_34534	0	0.923	2.649	0
novel:GL893964.1_34806	134.592	284.404	203.939	369.992
novel:GL893675.2_33288	1.795	1.847	1.324	0
novel:GL893653.2_33336	0	5.54	0	0
novel:GL893595.2_33582	118.889	105.266	101.97	10155.1
novel:GL893496.1_34130	0.897	0	1.324	1.271
novel:GL893483.1_34208	180.801	674.997	128.455	676.412
novel:GL893425.2_32991	0.449	0	0	0
novel:GL893397.2_32935	0.449	0.923	0	1.271
novel:GL893360.2_33789	3.14	1.847	0	2.543
novel:GL893334.2_33043	2.243	12.004	9.27	19.072
novel:GL893271.1_34842	0	0.923	1.324	0
novel:GL893233.1_34694	0	0.923	1.324	0
novel:GL893173.1_33471	0	0	31.783	3.814
novel:GL893138.2_33404	3.14	1.847	2.649	16.529
novel:GL893138.2_33402	0.897	0	3.973	0
novel:GL892983.1_34817	128.311	22.161	2.649	0
novel:GL892963.1_33649	0	0.923	0	0
novel:GL892961.2_33986	1.346	1.847	0	2.543
novel:GL892953.2_32660	5.384	0	0	0
novel:GL892946.2_32453	87.485	62.79	119.185	214.875
novel:GL892848.2_32578	0.449	2.77	0	2.543
novel:GL892829.1_33832	6.281	23.085	42.377	55.944
novel:GL892805.1_32927	9.421	24.932	7.946	7.629
novel:GL892729.1_33665	0	0	2.649	2.543
novel:GL892332.2_32230	26.918	35.089	35.756	49.587
novel:9_30597	0.449	0.923	0	0
novel:9_30429	187.082	30.472	83.43	1802.92
novel:9_30334	0	0.923	3.973	5.086
novel:9_30290	0.897	1.847	0	1.271
novel:9_30220	1.346	0.923	2.649	2.543
novel:9_30136	4.486	21.238	0	120.788
novel:9_30126	12.113	56.327	34.431	48.315
novel:9_30124	4.038	8.311	3.973	35.601
novel:9_30002	4.486	4.617	1.324	1.271
novel:9_29954	0	0	0	1.271
novel:9_29931	14.356	24.008	9.27	61.03
novel:9_29915	14.356	24.008	9.27	61.03
novel:9_29904	0.897	0	0	0
novel:9_29878	0.449	0	0	0
novel:9_29871	11.665	0	2.649	5.086
novel:9_29867	11.665	0	2.649	5.086
novel:9_29857	3.14	0	0	0
novel:9_29698	1.795	0	2.649	1.271
novel:9_29607	0.449	0	2.649	0
novel:9_29494	3.14	1.847	3.973	5.086
novel:9_29441	2.692	1.847	0	1.271
novel:9_29380	6.281	23.085	42.377	55.944
novel:9_29294	0.449	0.923	0	0
novel:9_29238	0.449	0	1.324	0
novel:9_29223	4.486	11.081	5.297	7.629
novel:9_29218	0.897	0.923	0	3.814
novel:9_29131	127.413	195.758	58.268	624.282
novel:9_29095	1.346	1.847	3.973	2.543
novel:9_29087	0.449	0	1.324	2.543
novel:9_29084	38.134	9.234	30.458	52.129
novel:9_29082	1475.57	385.977	1316.34	1321.04
novel:9_29056	0.449	0	0	0
novel:9_29019	43.518	18.468	51.647	40.686
novel:8_28953	7.627	3.694	2.649	0
novel:8_28895	36.788	31.395	56.944	61.03
novel:8_28866	0	0.923	0	0
novel:8_28663	0.449	1.847	0	0
novel:8_28661	0.449	1.847	0	0
novel:8_28608	3.14	8.311	2.649	2.543
novel:8_28487	8.075	7.387	0	1.271
novel:8_28485	1.346	1.847	0	1.271
novel:8_28466	4.935	0	0	0
novel:8_28455	0	0	2.649	0
novel:8_28361	2.243	0.923	0	3.814
novel:8_28323	0.449	0	0	1.271
novel:8_28300	141.321	355.505	454.229	717.098
novel:8_28292	0	1.847	0	0
novel:8_28121	0	0	0	100.445
novel:8_27968	0.897	0	0	0
novel:8_27936	0.449	0	0	0
novel:8_27898	423.066	556.804	573.414	1687.21
novel:8_27728	2.243	8.311	2.649	0
novel:8_27668	1.346	0	1.324	2.543
novel:7_27585	4.935	2.77	1.324	0
novel:7_27554	0	3.694	0	1.271
novel:7_27506	7.627	5.54	43.701	5.086
novel:7_27477	1.346	5.54	7.946	7.629
novel:7_27464	1.346	4.617	0	3.814
novel:7_27413	20.189	20.315	51.647	83.916
novel:7_27400	4.935	2.77	11.919	6.357
novel:7_27381	7.627	8.311	9.27	5.086
novel:7_27315	1.346	0.923	1.324	1.271
novel:7_27074	0.449	1.847	1.324	1.271
novel:7_27063	0	3.694	0	2.543
novel:7_27056	1.795	2.77	0	0
novel:7_27032	0.449	0	1.324	2.543
novel:7_26933	0.449	0	2.649	0
novel:7_26855	1.795	3.694	5.297	1.271
novel:7_26852	22.432	5.54	30.458	24.158
novel:7_26811	0.897	2.77	3.973	2.543
novel:7_26575	0	0.923	0	0
novel:7_26573	43.069	42.476	5.297	16.529
novel:7_26541	4.486	6.464	10.594	7.629
novel:7_26531	4.486	6.464	10.594	7.629
novel:7_26506	2.243	3.694	1.324	1.271
novel:7_26494	0.897	0	0	1.271
novel:7_26428	90.625	186.525	30.458	64.844
novel:7_26324	0.449	2.77	0	2.543
novel:7_26310	146.256	48.016	241.019	317.863
novel:7_26177	0.449	0	0	0
novel:7_26175	8.973	9.234	11.919	5.086
novel:7_26165	2.243	2.77	1.324	1.271
novel:7_26136	0.449	0	1.324	1.271
novel:7_26126	1.346	2.77	9.27	50.858
novel:7_26076	0.897	0.923	0	1.271
novel:7_26033	156.575	263.166	243.668	222.504
novel:7_26015	1.346	1.847	1.324	1.271
novel:7_25957	3.14	0.923	2.649	0
novel:7_25950	0	1.847	0	0
novel:7_25947	1.346	6.464	6.621	1.271
novel:7_25944	2.243	0.923	0	1.271
novel:7_25939	0.449	0	1.324	1.271
novel:7_25916	3.589	0	2.649	6.357
novel:7_25882	0	0.923	0	0
novel:7_25776	0.449	2.77	1.324	2.543
novel:7_25753	0.449	0	0	0
novel:7_25747	0.449	0	2.649	2.543
novel:7_25726	21.086	44.323	30.458	33.058
novel:7_25645	0	1.847	0	0
novel:7_25617	2.243	0.923	0	0
novel:7_25613	0.449	0.923	1.324	0
novel:7_25611	0	0	1.324	0
novel:7_25607	1.346	0	0	0
novel:7_25597	0	1.847	3.973	2.543
novel:7_25595	0	1.847	3.973	2.543
novel:7_25592	39.929	3.694	13.243	10.172
novel:7_25570	4674.82	1985.29	4836.28	5682.11
novel:6_25300	7.178	0	7.946	1.271
novel:6_25291	1.795	0.923	0	0
novel:6_25194	2.692	1.847	3.973	2.543
novel:6_25149	423.066	556.804	572.09	1688.49
novel:6_25100	0	1.847	0	3.814
novel:6_25061	1.346	10.157	5.297	1.271
novel:6_25026	0.449	0	3.973	0
novel:6_24975	54.734	97.879	15.891	21.615
novel:6_24870	0.449	0	0	0
novel:6_24862	0.449	0	0	0
novel:6_24839	0.449	8.311	1.324	1.271
novel:6_24821	0.897	1.847	6.621	2.543
novel:6_24814	0.449	0	0	0
novel:6_24698	0	0	0	1.271
novel:6_24691	0.449	0.923	0	1.271
novel:6_24662	0.897	0	2.649	1.271
novel:6_24650	1.795	0	1.324	0
novel:6_24625	0	0.923	1.324	0
novel:6_24594	1.795	0.923	1.324	0
novel:6_24589	12.113	7.387	22.513	50.858
novel:6_24588	5.384	8.311	3.973	3.814
novel:6_24568	0.449	0	2.649	0
novel:6_24550	0	0	0	3.814
novel:6_24544	0.449	0	0	1.271
novel:6_24517	3.14	3.694	1.324	2.543
novel:6_24516	0	0	1.324	0
novel:6_24511	0	2.77	1.324	1.271
novel:6_24474	22.881	20.315	17.216	10.172
novel:6_24467	2.243	0	1.324	1.271
novel:6_24442	1.346	3.694	1.324	1.271
novel:6_24433	1.346	4.617	2.649	2.543
novel:6_24430	0.449	0	0	0
novel:6_24427	1.795	2.77	5.297	1.271
novel:6_24381	1.346	2.77	5.297	1.271
novel:6_24370	13.908	7.387	31.783	48.315
novel:6_24337	33.199	13.851	23.837	33.058
novel:6_24292	1.346	0	1.324	0
novel:6_24249	0.897	0.923	0	2.543
novel:6_24231	1.346	0	1.324	0
novel:6_24220	2.243	9.234	10.594	5.086
novel:6_23953	2.243	5.54	1.324	6.357
novel:6_23923	3.14	0.923	1.324	8.9
novel:6_23902	0.449	0	0	0
novel:6_23872	0.449	0.923	2.649	0
novel:6_23852	0.449	0	1.324	2.543
novel:6_23789	749.227	180.984	651.547	628.097
novel:6_23611	1.346	3.694	3.973	7.629
novel:6_23533	15.702	22.161	11.919	12.715
novel:6_23495	2.692	0	1.324	0
novel:6_23476	120.235	62.79	74.16	1776.22
novel:6_23421	2.243	3.694	6.621	1.271
novel:6_23348	1.346	10.157	10.594	6.357
novel:6_23344	0	0	0	2.543
novel:6_23315	5.384	0	0	0
novel:6_23293	0.449	0	0	0
novel:6_23237	0	1.847	2.649	0
novel:6_23211	5.832	22.161	2.649	0
novel:6_23161	0	3.694	2.649	5.086
novel:6_23097	0	0	0	1.271
novel:6_23070	0.897	1.847	0	0
novel:6_22915	0	0.923	1.324	1.271
novel:6_22913	1.346	0	0	2.543
novel:6_22905	0	1.847	1.324	0
novel:6_22869	4.038	1.847	1.324	63.573
novel:6_22843	1.795	0	1.324	0
novel:6_22838	0.449	0.923	0	0
novel:6_22831	0.897	1.847	0	0
novel:6_22829	0.897	1.847	0	0
novel:6_22755	0.897	0.923	0	2.543
novel:6_22705	0.897	0	0	0
novel:6_22660	0.897	0.923	0	2.543
novel:6_22583	4.935	6.464	2.649	1.271
novel:6_22579	0.897	1.847	0	2.543
novel:6_22572	0	9.234	0	1.271
novel:6_22570	0	0	1.324	0
novel:6_22499	0.449	0	1.324	0
novel:6_22498	5.384	6.464	5.297	3.814
novel:5_22480	0.449	0	0	3.814
novel:5_22468	1.346	0.923	0	0
novel:5_22453	725.449	309.335	765.435	902.73
novel:5_22365	0.449	0.923	2.649	0
novel:5_22327	0.449	0.923	2.649	2.543
novel:5_22319	0	0.923	1.324	0
novel:5_22299	0	0	1.324	0
novel:5_22272	0.449	0	3.973	0
novel:5_22239	22.881	21.238	14.567	25.429
novel:5_22179	14.805	146.819	301.936	300.062
novel:5_22144	2.692	1.847	7.946	6.357
novel:5_22140	14.805	1.847	1.324	1.271
novel:5_22120	2.243	10.157	10.594	21.615
novel:5_22106	0.449	0	0	0
novel:5_22094	0.449	0	0	0
novel:5_22062	0.449	0.923	1.324	0
novel:5_22042	0.897	2.77	1.324	1.271
novel:5_22033	21.983	12.927	10.594	20.343
novel:5_22028	0.897	0	0	0
novel:5_22026	0	0	1.324	2.543
novel:5_21920	7.178	12.927	9.27	2.543
novel:5_21912	1.346	1.847	0	0
novel:5_21905	0.449	0.923	0	1.271
novel:5_21872	0.449	0	1.324	3.814
novel:5_21821	3.589	10.157	2.649	8.9
novel:5_21735	0	0.923	0	0
novel:5_21733	1.795	0	3.973	3.814
novel:5_21495	1.346	0	3.973	2.543
novel:5_21377	275.913	834.744	67.538	256.833
novel:5_21289	5.832	16.621	30.458	26.7
novel:5_21283	5.832	16.621	30.458	26.7
novel:5_21274	1.795	0.923	5.297	1.271
novel:5_21264	1.795	0.923	5.297	1.271
novel:5_21258	0.449	1.847	2.649	2.543
novel:5_21201	1.346	2.77	1.324	1.271
novel:5_21179	102.29	288.097	125.807	57.215
novel:5_21169	2.243	1.847	0	1.271
novel:5_21158	0.897	0	0	0
novel:4_20943	0	0	0	1.271
novel:4_20913	0.897	8.311	1.324	2.543
novel:4_20872	8.075	4.617	10.594	6.357
novel:4_20858	6.281	2.77	1.324	1.271
novel:4_20842	0.449	0	0	0
novel:4_20839	0.897	0	0	1.271
novel:4_20829	11.216	24.932	23.837	12.715
novel:4_20827	11.216	24.932	23.837	12.715
novel:4_20813	11.216	24.932	23.837	12.715
novel:4_20719	0.449	0	0	1.271
novel:4_20680	0.897	0	0	1.271
novel:4_20618	0	0.923	1.324	1.271
novel:4_20608	0.449	0.923	0	0
novel:4_20597	0.449	0	0	0
novel:4_20549	0.449	1.847	1.324	0
novel:4_20528	0.897	0	0	0
novel:4_20455	0.449	3.694	1.324	7.629
novel:4_20426	0	0.923	0	0
novel:4_20327	1.346	1.847	0	0
novel:4_20247	49.35	68.331	21.189	27.972
novel:4_20244	1.795	1.847	0	2.543
novel:4_20166	0	0.923	1.324	0
novel:4_20145	1.346	0	0	0
novel:4_20133	3.589	5.54	2.649	5.086
novel:4_20101	0.449	8.311	9.27	6.357
novel:4_20073	4.935	2.77	5.297	6.357
novel:4_20037	55.183	162.516	307.233	292.434
novel:4_20035	55.183	162.516	307.233	292.434
novel:4_20017	55.183	162.516	307.233	292.434
novel:4_19999	40.826	18.468	14.567	3.814
novel:4_19970	0.449	0.923	0	0
novel:4_19948	0.449	0.923	0	0
novel:4_19920	0.449	0.923	0	2.543
novel:4_19854	0.449	0	0	0
novel:4_19840	17.497	14.774	17.216	13.986
novel:4_19838	8.973	7.387	3.973	30.515
novel:4_19798	0.449	0.923	0	0
novel:4_19754	4.486	0	1.324	0
novel:4_19751	0.449	1.847	0	0
novel:4_19725	0.897	1.847	3.973	6.357
novel:4_19717	0.897	0	0	184.36
novel:4_19703	3.14	4.617	1.324	1.271
novel:4_19699	0.897	0	0	0
novel:4_19568	0.449	4.617	0	1.271
novel:4_19477	46.658	32.319	11.919	25.429
novel:4_19421	1.346	0	0	1.271
novel:4_19420	0.449	0	0	1.271
novel:4_19405	1.346	1.847	1.324	6.357
novel:4_19394	56.977	33.242	29.134	26.7
novel:4_19370	355.322	1107.14	218.507	867.129
novel:3_19349	0.449	4.617	11.919	8.9
novel:3_19334	248.097	385.977	263.532	462.808
novel:3_19319	5.384	0.923	1.324	54.672
novel:3_19276	0	0.923	2.649	3.814
novel:3_19275	0	0.923	2.649	3.814
novel:3_19245	0.449	0.923	0	0
novel:3_19243	0	0	0	2.543
novel:3_19218	240.47	1671.33	192.021	381.435
novel:3_19198	0	0	0	2.543
novel:3_19095	0	2.77	0	3.814
novel:3_19091	9.87	41.553	6.621	58.487
novel:3_19086	1.346	4.617	3.973	0
novel:3_18957	3.589	8.311	2.649	16.529
novel:3_18917	332.441	288.097	47.674	86.459
novel:3_18901	6.281	6.464	10.594	7.629
novel:3_18867	0.449	3.694	0	0
novel:3_18864	12.113	28.625	2.649	10.172
novel:3_18854	8843.12	19551.8	7650.38	29586.7
novel:3_18805	882.024	847.671	293.991	310.234
novel:3_18790	0.449	0	0	2.543
novel:3_18776	1.795	2.77	2.649	5.086
novel:3_18751	1.795	0	0	0
novel:3_18700	0	0.923	1.324	1.271
novel:3_18697	0	1.847	0	0
novel:3_18589	105.879	255.779	34.431	72.473
novel:3_18558	0.897	0.923	0	0
novel:3_18557	0.897	0.923	0	0
novel:3_18556	0.897	1.847	1.324	0
novel:3_18548	0.449	0	2.649	0
novel:3_18540	1.795	0.923	1.324	2.543
novel:3_18472	0	0	2.649	0
novel:3_18461	0.449	0	1.324	0
novel:3_18432	0.897	0	0	0
novel:3_18416	0.897	0	7.946	3.814
novel:3_18412	0.449	0	1.324	0
novel:3_18386	0	0	25.161	25.429
novel:3_18358	0.449	4.617	11.919	8.9
novel:3_18313	0.449	0	2.649	0
novel:3_18309	1.346	0.923	5.297	7.629
novel:3_18299	0	5.54	3.973	6.357
novel:3_18131	0.449	0.923	3.973	5.086
novel:3_18102	0.897	0	3.973	0
novel:3_18054	13.908	35.089	75.484	72.473
novel:3_18053	13.459	34.165	75.484	72.473
novel:3_17866	0.897	0.923	3.973	6.357
novel:3_17854	0	0.923	2.649	3.814
novel:3_17830	48.453	315.799	18.54	17.8
novel:3_17820	0.449	3.694	0	0
novel:3_17805	8843.12	19551.8	7650.38	29586.7
novel:3_17755	0.449	0	0	1.271
novel:3_17614	0.449	0	0	0
novel:3_17564	0.449	2.77	0	2.543
novel:3_17543	1.795	0	2.649	29.243
novel:3_17525	0.449	0	0	0
novel:3_17510	0.897	4.617	1.324	2.543
novel:3_17483	20.189	15.698	14.567	11.443
novel:3_17402	4.935	1.847	0	3.814
novel:3_17356	0.449	0	1.324	0
novel:3_17307	0.449	0	0	2.543
novel:3_17294	1.795	0.923	0	1.271
novel:3_17276	0	0.923	0	0
novel:2_17243	0.449	0	0	0
novel:2_17210	0	0	1.324	0
novel:2_17174	3.14	1.847	1.324	3.814
novel:2_17155	0	0.923	0	1.271
novel:2_17147	0	0	0	1.271
novel:2_16933	0.897	0	0	2.543
novel:2_16889	6.73	21.238	14.567	8.9
novel:2_16834	0.449	0.923	0	0
novel:2_16733	2.243	2.77	0	0
novel:2_16691	15.254	16.621	13.243	118.245
novel:2_16690	0.897	0.923	0	2.543
novel:2_16668	0.897	2.77	1.324	0
novel:2_16658	2.243	0	1.324	3.814
novel:2_16624	17.946	24.932	15.891	20.343
novel:2_16621	4.486	1.847	0	1.271
novel:2_16576	0.449	0.923	1.324	0
novel:2_16558	0	0	1.324	0
novel:2_16542	13.011	7.387	13.243	36.872
novel:2_16525	0.449	0	0	0
novel:2_16519	2.243	0	0	0
novel:2_16464	7.627	49.863	19.864	21.615
novel:2_16458	0	1.847	0	0
novel:2_16360	8.524	5.54	56.944	5.086
novel:2_16351	0.897	3.694	0	2.543
novel:2_16314	0.449	0	0	0
novel:2_16279	0	0.923	1.324	0
novel:2_16276	228.806	110.807	181.427	293.705
novel:2_16224	1.795	0	1.324	5.086
novel:2_16152	8.075	5.54	13.243	5.086
novel:2_16146	0	0.923	9.27	13.986
novel:2_16138	0	0	2.649	5.086
novel:2_16135	3.589	6.464	13.243	6.357
novel:2_16130	0	0	2.649	0
novel:2_16104	9.421	0.923	3.973	5.086
novel:2_16073	2.243	1.847	0	2.543
novel:2_16010	1.346	1.847	1.324	2.543
novel:2_16002	0	1.847	1.324	0
novel:2_15994	0.897	0	3.973	0
novel:2_15981	0	0.923	0	0
novel:2_15941	0	0	1.324	0
novel:2_15905	1.795	1.847	0	1.271
novel:2_15877	0.449	0	0	0
novel:2_15873	12.562	0.923	1.324	1.271
novel:2_15869	0.449	0	0	0
novel:2_15847	1.346	0	0	0
novel:2_15841	0.897	0	2.649	1.271
novel:2_15817	0	0	2.649	0
novel:2_15605	0.449	0	0	0
novel:2_15569	0.897	0.923	0	2.543
novel:2_15552	237.33	606.667	524.416	516.209
novel:2_15526	20.189	19.391	50.323	73.744
novel:2_15524	0	4.617	1.324	1.271
novel:2_15425	6.281	3.694	15.891	16.529
novel:2_15413	28.713	53.557	19.864	24.158
novel:2_15404	0	0	1.324	0
novel:2_15382	0.897	0	0	0
novel:2_15373	201.887	64.637	186.724	369.992
novel:2_15363	62.809	36.012	58.268	85.187
novel:2_15359	0.897	2.77	1.324	0
novel:2_15325	0	0	1.324	1.271
novel:2_15313	0.897	0.923	2.649	2.543
novel:2_15261	0.897	0	0	0
novel:2_15257	0	0.923	1.324	0
novel:2_15149	0.897	0.923	0	0
novel:2_15144	1.795	8.311	11.919	7.629
novel:2_15087	0	0	2.649	1.271
novel:2_14987	4.486	11.081	5.297	7.629
novel:2_14917	1.795	1.847	1.324	0
novel:2_14833	4.486	11.081	9.27	19.072
novel:2_14822	10.767	14.774	14.567	12.715
novel:2_14821	9.87	14.774	14.567	8.9
novel:2_14777	1.346	1.847	0	1.271
novel:2_14765	1.795	0.923	1.324	0
novel:2_14722	0	0	0	3.814
novel:2_14681	1.346	1.847	5.297	6.357
novel:2_14570	3.589	178.214	589.306	1198.98
novel:2_14561	9.421	0.923	3.973	5.086
novel:2_14535	0.449	0	0	1.271
novel:2_14515	0.449	5.54	3.973	5.086
novel:2_14507	3.14	1.847	0	2.543
novel:18_14460	4.486	2.77	1.324	7.629
novel:18_14448	1.346	0	2.649	3.814
novel:18_14441	2.692	0	0	0
novel:18_14303	51.145	92.339	108.591	97.902
novel:18_14294	200.99	83.105	156.265	272.09
novel:18_14270	8.075	0	0	6.357
novel:18_14242	0.449	0	1.324	0
novel:18_14214	7.178	4.617	13.243	8.9
novel:18_14141	0	0.923	0	0
novel:18_14043	4.038	6.464	0	3.814
novel:18_14027	0	0	0	1.271
novel:18_13994	0	0	1.324	0
novel:18_13992	0	0	0	3.814
novel:18_13988	0	0	0	3.814
novel:18_13977	0	0.923	0	0
novel:18_13955	5.832	6.464	2.649	1.271
novel:18_13903	0	0	0	1.271
novel:18_13865	0.897	0.923	0	0
novel:18_13844	0.449	1.847	1.324	0
novel:18_13733	0.897	2.77	0	0
novel:17_13726	0	0.923	0	0
novel:17_13720	0	0	1.324	0
novel:17_13715	0	0.923	0	0
novel:17_13714	0	0	5.297	8.9
novel:17_13678	78.96	52.633	52.971	39.415
novel:17_13657	6.281	15.698	27.81	24.158
novel:17_13634	0.897	0.923	0	0
novel:17_13631	13.011	0	2.649	1.271
novel:17_13627	0	0.923	2.649	0
novel:17_13537	0.449	0	0	0
novel:17_13526	2.692	3.694	7.946	2.543
novel:17_13525	2.692	3.694	7.946	2.543
novel:17_13520	2.692	3.694	7.946	2.543
novel:17_13519	2.692	3.694	7.946	2.543
novel:17_13451	82.101	28.625	108.591	175.46
novel:17_13252	10.767	0.923	5.297	15.257
novel:17_13221	6.281	0.923	0	0
novel:17_13214	4.935	12.927	5.297	3.814
novel:17_13048	0	0	0	1.271
novel:17_13046	3.14	22.161	35.756	21.615
novel:17_12998	955.152	868.909	144.347	367.449
novel:17_12974	0	2.77	3.973	2.543
novel:17_12940	0	0.923	0	2.543
novel:17_12938	0	0.923	0	2.543
novel:17_12845	0	7.387	1.324	5.086
novel:17_12838	7.178	3.694	7.946	2.543
novel:16_12705	0.449	3.694	2.649	1.271
novel:16_12638	31699	15327.3	45359.3	92173.8
novel:16_12563	0	0	0	8.9
novel:16_12483	36.34	8.311	2.649	5.086
novel:16_12460	4.038	0	5.297	7.629
novel:16_12448	0.897	9.234	5.297	3.814
novel:16_12428	3.589	0.923	2.649	2.543
novel:16_12415	0	0	0	1.271
novel:16_12373	10.319	6.464	0	2.543
novel:16_12357	8.075	6.464	1.324	11.443
novel:16_12284	0	14.774	25.161	34.329
novel:16_12259	13.011	1.847	3.973	3.814
novel:16_12193	7.178	3.694	25.161	29.243
novel:16_12121	2.243	0.923	2.649	1.271
novel:16_12093	0	0.923	5.297	1.271
novel:15_12081	90.625	104.343	45.026	91.544
novel:15_12056	0	3.694	0	0
novel:15_12033	0.449	0	10.594	15.257
novel:15_12026	4.935	0.923	0	0
novel:15_12025	6.281	0.923	0	0
novel:15_11976	0	0	1.324	3.814
novel:15_11967	294.307	81.258	297.964	1056.58
novel:15_11906	0	0	1.324	0
novel:15_11767	8.075	6.464	22.513	40.686
novel:15_11164	2.243	0	0	0
novel:15_11153	0.897	0.923	0	1.271
novel:15_11079	0.449	0.923	1.324	0
novel:15_11056	4.038	3.694	37.08	8.9
novel:15_11028	1.346	0	2.649	1.271
novel:15_11001	3.14	0	0	1.271
novel:15_10989	10.319	0.923	15.891	25.429
novel:15_10955	0	0	1.324	1.271
novel:15_10944	0.449	0	0	1.271
novel:15_10933	2.243	2.77	1.324	1.271
novel:15_10921	0.449	0	1.324	0
novel:15_10910	0.897	0.923	0	0
novel:15_10899	0	0	1.324	3.814
novel:15_10898	4.486	0	1.324	0
novel:15_10879	0.449	0	3.973	3.814
novel:15_10712	0.449	0	3.973	0
novel:15_10659	12.113	8.311	5.297	15.257
novel:15_10655	1.346	0	0	0
novel:15_10295	0.897	0	0	0
novel:15_10280	0.449	0.923	1.324	0
novel:15_10210	13.459	54.48	70.187	101.716
novel:14_9934	0.449	0.923	0	0
novel:14_9876	1.346	6.464	0	5.086
novel:14_9710	0	0	2.649	0
novel:14_9706	0	0	2.649	0
novel:14_9596	1.346	0	0	0
novel:14_9574	0.449	0.923	0	0
novel:14_9508	473.314	933.546	209.237	260.647
novel:14_9470	2.243	0.923	7.946	1.271
novel:14_9385	0.449	0.923	1.324	1.271
novel:14_9242	2.243	5.54	7.946	30.515
novel:14_9208	0	0	1.324	0
novel:14_9159	0	1.847	1.324	0
novel:14_9104	0	0	0	1.271
novel:14_9083	0.449	2.77	1.324	0
novel:14_9081	0	0	1.324	0
novel:14_9071	3.589	0.923	0	0
novel:14_9009	4.486	7.387	3.973	2.543
novel:14_8884	0	3.694	5.297	7.629
novel:14_8855	7.627	14.774	9.27	11.443
novel:14_8829	1.346	0.923	0	0
novel:14_8806	0	0	1.324	0
novel:14_8798	0.449	0	0	0
novel:14_8795	1.346	0	1.324	0
novel:14_8670	1.346	1.847	1.324	0
novel:14_8623	28.264	36.012	33.107	44.501
novel:14_8555	0.449	3.694	1.324	1.271
novel:14_8554	0.449	0	0	0
novel:14_8553	0.449	0	0	0
novel:14_8552	6.281	6.464	1.324	6.357
novel:14_8454	2.243	16.621	30.458	12.715
novel:14_8353	0.449	1.847	2.649	1.271
novel:14_8345	5.384	16.621	22.513	38.144
novel:14_8237	1517.3	1775.68	1685.81	2011.43
novel:14_10198	0	0.923	0	0
novel:14_10161	15.254	23.085	55.62	53.401
novel:14_10154	71.782	48.94	161.562	264.462
novel:14_10128	1.346	3.694	1.324	1.271
novel:14_10096	2.243	2.77	1.324	5.086
novel:14_10094	32.302	61.867	50.323	20.343
novel:14_10089	0	0	0	1.271
novel:14_10000	0.449	0	1.324	2.543
novel:13_8139	1.795	10.157	3.973	5.086
novel:13_8039	0.449	0.923	0	0
novel:13_8025	1.795	0	1.324	1.271
novel:13_7999	0.449	0	0	0
novel:13_7984	0	0	0	1.271
novel:13_7926	0.897	0	0	0
novel:13_7902	0.897	2.77	7.946	2.543
novel:13_7890	2.243	2.77	2.649	5.086
novel:13_7889	2.243	1.847	2.649	3.814
novel:13_7885	1.346	4.617	6.621	1.271
novel:13_7822	25.572	58.174	64.89	63.573
novel:13_7802	51.145	11.081	35.756	58.487
novel:13_7738	1.346	0.923	1.324	2.543
novel:13_7723	0.449	0	0	68.658
novel:13_7712	0.449	0	0	1.271
novel:13_7644	0.449	0.923	0	1.271
novel:13_7600	0.897	0	0	1.271
novel:13_7595	0.449	0	0	0
novel:13_7574	0	0	0	1.271
novel:13_7573	0	0	0	1.271
novel:13_7539	0.449	1.847	1.324	0
novel:13_7515	46.658	11.081	71.511	48.315
novel:13_7512	0.897	0	0	0
novel:13_7438	6.73	1.847	0	0
novel:13_7372	0.897	7.387	1.324	2.543
novel:13_7371	0.897	8.311	1.324	2.543
novel:13_7290	1.346	0	0	2.543
novel:13_7283	33.648	39.706	23.837	12.715
novel:13_7280	0.449	1.847	5.297	3.814
novel:13_7255	2.692	0	1.324	0
novel:13_7211	249.443	156.976	168.184	3366.8
novel:13_7104	4.038	3.694	2.649	3.814
novel:13_6999	0	0	0	1.271
novel:13_6990	0.897	2.77	1.324	1.271
novel:13_6934	4.038	11.081	14.567	50.858
novel:13_6884	4.935	4.617	2.649	3.814
novel:13_6790	0.897	8.311	9.27	6.357
novel:13_6701	1.795	2.77	0	0
novel:13_6627	1.346	0	0	0
novel:13_6539	0.449	0.923	0	1.271
novel:13_6450	0	0.923	0	0
novel:13_6436	0.449	0.923	0	0
novel:13_6424	0.449	0.923	0	0
novel:13_6392	378.651	140.355	451.58	554.352
novel:13_6388	0.449	0	0	1.271
novel:13_6373	0.897	0	0	2.543
novel:13_6354	154.78	162.516	203.939	142.402
novel:13_6320	0	0	0	2.543
novel:13_6314	2.692	6.464	7.946	20.343
novel:13_6309	0.897	8.311	7.946	8.9
novel:13_6299	0	0	1.324	0
novel:13_6295	0.449	0.923	1.324	0
novel:13_6228	1.346	0	0	1.271
novel:12_6186	3.589	6.464	5.297	10.172
novel:12_6182	0	0.923	0	0
novel:12_6053	134.592	284.404	203.939	369.992
novel:12_6014	1.795	3.694	3.973	7.629
novel:12_5986	7.178	0.923	17.216	3.814
novel:12_5974	6.281	8.311	21.189	16.529
novel:12_5970	0	0.923	1.324	0
novel:12_5969	0	0.923	1.324	1.271
novel:12_5942	0.449	0	0	1.271
novel:12_5921	0.449	0	0	0
novel:12_5840	1.795	0	0	0
novel:12_5812	40.826	75.718	37.08	38.144
novel:12_5811	80.755	119.117	74.16	69.93
novel:12_5763	6.281	6.464	3.973	5.086
novel:12_5761	6.281	6.464	3.973	5.086
novel:12_5756	108.571	29.548	139.05	191.989
novel:12_5730	10.319	25.855	35.756	24.158
novel:12_5720	0	0.923	0	2.543
novel:12_5687	46.21	17.544	34.431	194.532
novel:12_5685	46.21	17.544	34.431	194.532
novel:12_5682	0.449	2.77	1.324	2.543
novel:12_5652	0	8.311	6.621	1.271
novel:12_5634	0	2.77	0	0
novel:12_5576	0.897	1.847	0	0
novel:12_5486	0	0	1.324	0
novel:12_5440	4.486	6.464	5.297	7.629
novel:12_5409	0.449	1.847	0	0
novel:12_5407	1.346	0.923	0	1.271
novel:12_5404	0	0	1.324	0
novel:12_5165	0.897	0.923	1.324	0
novel:12_5043	1.346	0	2.649	2.543
novel:12_5039	0	0.923	2.649	0
novel:12_5027	0.897	2.77	0	0
novel:12_5015	0.449	0	0	1.271
novel:12_4913	852.862	1799.68	1007.78	1018.43
novel:12_4898	0.449	1.847	1.324	1.271
novel:12_4789	3.589	0	5.297	5.086
novel:12_4723	27.367	73.871	185.4	225.047
novel:12_4688	0.449	0.923	0	0
novel:12_4573	0.449	0	0	0
novel:12_4543	95.111	1.847	21.189	0
novel:12_4477	0.897	0.923	1.324	0
novel:12_4462	33.648	18.468	10.594	15.257
novel:11_4420	0.449	0	0	0
novel:11_4409	0	0.923	1.324	0
novel:11_4361	2.243	1.847	2.649	1.271
novel:11_4281	90.625	24.932	206.588	147.488
novel:11_4230	0.897	0.923	6.621	1.271
novel:11_4171	2.243	0.923	0	0
novel:11_4169	2.243	0.923	0	0
novel:11_4125	0	0.923	0	0
novel:11_4124	0.449	0	1.324	1.271
novel:11_4108	0	0	1.324	0
novel:11_4083	1.795	0.923	1.324	3.814
novel:11_4056	0	0	1.324	0
novel:11_4049	852.862	1799.68	1007.78	1018.43
novel:11_4036	0	0.923	0	0
novel:11_3969	245.405	111.73	598.576	476.794
novel:11_3861	5.832	3.694	3.973	1.271
novel:11_3849	48.902	154.206	46.35	41.958
novel:11_3791	4.038	19.391	3.973	5.086
novel:10_3727	2.692	26.778	5.297	17.8
novel:10_3554	2.243	2.77	5.297	3.814
novel:10_3508	0	0	0	1.271
novel:10_3504	0.449	0	0	0
novel:10_3480	2.692	2.77	0	2.543
novel:10_3448	1.346	1.847	2.649	2.543
novel:10_3421	0	5.54	0	0
novel:10_3294	0	26.778	2.649	33.058
novel:10_3230	1.795	1.847	1.324	1.271
novel:10_3210	0.449	1.847	1.324	1.271
novel:10_3182	0.897	0	0	0
novel:10_3162	0.449	0.923	1.324	0
novel:10_3091	0	0	0	1.271
novel:10_3079	0	0	0	1.271
novel:10_3019	2.243	4.617	3.973	1.271
novel:10_2976	1.346	0.923	0	0
novel:10_2975	0	0.923	0	0
novel:1_954	0.897	5.54	26.486	22.886
novel:1_935	10.767	18.468	25.161	30.515
novel:1_872	0.449	0	1.324	2.543
novel:1_850	4.486	2.77	13.243	5.086
novel:1_716	0	0	0	1.271
novel:1_713	2.243	0	0	2.543
novel:1_485	6.73	4.617	1.324	13.986
novel:1_457	9.421	41.553	51.647	64.844
novel:1_357	2.692	2.77	0	0
novel:1_338	0.449	0	0	0
novel:1_2902	13.908	21.238	90.051	27.972
novel:1_2801	0	2.77	2.649	2.543
novel:1_2800	2.243	12.004	9.27	19.072
novel:1_2743	12.113	8.311	7.946	10.172
novel:1_2710	0.897	0	2.649	0
novel:1_2701	0	0	0	1.271
novel:1_2694	0.449	0.923	5.297	1.271
novel:1_2685	5.384	2.77	1.324	1.271
novel:1_2647	0.449	0	0	0
novel:1_2645	0.449	0	0	0
novel:1_264	0.449	1.847	5.297	7.629
novel:1_2596	0	1.847	1.324	0
novel:1_2588	0.897	0	0	0
novel:1_2582	17.497	0.923	0	0
novel:1_2516	2.243	1.847	1.324	1.271
novel:1_2460	0	0	0	1.271
novel:1_2327	0.897	0	0	0
novel:1_2311	0.449	0	1.324	2.543
novel:1_2294	0	3.694	2.649	7.629
novel:1_2248	0.897	0	1.324	0
novel:1_2205	0.897	0	0	0
novel:1_203	1.346	0.923	0	0
novel:1_1991	43.967	7.387	59.593	584.867
novel:1_1943	0.449	0	0	0
novel:1_1924	13.908	72.948	284.721	361.092
novel:1_155	0.897	0	1.324	1.271
novel:1_1509	0	0	0	1.271
novel:1_1449	0	0.923	0	1.271
novel:1_1421	3.589	4.617	0	2.543
novel:1_1406	0	1.847	0	0
novel:1_14	0.897	3.694	2.649	0
novel:1_139	0.449	0.923	0	0
novel:1_1347	8.524	0	10.594	15.257
novel:1_1307	0.449	0.923	5.297	1.271
novel:1_1219	0	4.617	1.324	0
novel:1_1069	0	0	0	1.271
novel:1_1064	3.14	1.847	0	0
novel:1_1050	16.151	8.311	7.946	2.543
novel:1_1016	5186.71	3774.81	3245.82	1797.83

## Sheet: Identified lncRNA
Identified lncRNA in four samples
lncRNA ID	Type	YP-1	YP-2	OY-1	OY-2
ENSSSCG00000030974	antisense	0.163	0.209	0.074	0.11
ENSSSCG00000030846	antisense	3.742	26.88	1.167	1.015
ENSSSCG00000030716	antisense	0	0.045	0.117	0.156
ENSSSCG00000030747	antisense	0	0	0	0.142
ENSSSCG00000030754	antisense	0.333	0	0.064	0.133
ENSSSCG00000030760	antisense	0.203	0	0.053	0.239
ENSSSCG00000030812	antisense	0	0.036	0.361	0.161
ENSSSCG00000030894	antisense	0	0	0.021	0.074
ENSSSCG00000030899	antisense	1.293	0	0.573	0.574
ENSSSCG00000031021	antisense	0	0	0.117	0.041
ENSSSCG00000031026	antisense	0.22	0	0.191	0.041
ENSSSCG00000031056	antisense	0	1.756	0.881	1.719
ENSSSCG00000031059	antisense	0	0	0.042	0.096
MSTRG.100007	antisense	15.064	6.06	5.762	7.412
MSTRG.101040	antisense	0.366	1.192	0.106	0.133
MSTRG.10108	antisense	2.839	1.42	0.987	1.126
MSTRG.101090	antisense	0	1.165	0.318	0.331
MSTRG.101153	antisense	2.595	0.309	6.229	8.933
MSTRG.101179	antisense	0.838	1.547	4.383	1.686
MSTRG.101225	antisense	1.123	11.356	3.81	5.877
MSTRG.101286	antisense	0.114	0	0.053	0.138
MSTRG.101387	antisense	0.464	1.092	0.658	0.391
MSTRG.101464	antisense	0.024	0.728	0	0.032
MSTRG.10160	antisense	0.822	0.601	1.687	2.495
MSTRG.101618	antisense	0	0	0.265	0.244
MSTRG.101705	antisense	0	0.864	2.579	4.76
MSTRG.10178	antisense	0	0	0.053	0.037
MSTRG.101781	antisense	0	0	0.191	0.041
MSTRG.101943	antisense	2.806	6.615	2.759	2.334
MSTRG.102250	antisense	0	0	0.244	0.184
MSTRG.102470	antisense	0.285	0	0.276	0.308
MSTRG.102693	antisense	0.399	0.555	0.562	0.561
MSTRG.102913	antisense	1.033	0	0.106	1.53
MSTRG.103099	antisense	1.887	3.467	2.239	2.44
MSTRG.103106	antisense	0.244	0.628	0.446	0.524
MSTRG.103196	antisense	0.366	0	0.796	0.919
MSTRG.103327	antisense	1.887	0	1.507	2.334
MSTRG.103330	antisense	0.382	0	0.499	1.305
MSTRG.103374	antisense	1.171	2.248	2.611	3.014
MSTRG.103390	antisense	0.675	2.047	1.433	1.852
MSTRG.103427	antisense	0	0.246	0.096	0.225
MSTRG.103623	antisense	0	0	0.149	1.856
MSTRG.103973	antisense	2.188	2.994	0.902	1.112
MSTRG.104460	antisense	2.245	0	0.626	1.089
MSTRG.105527	antisense	1.733	0.701	0.891	0.519
MSTRG.105660	antisense	0	0	0.042	0
MSTRG.105730	antisense	0.081	1.747	4.393	0.211
MSTRG.106684	antisense	2.082	1.483	1.475	3.791
MSTRG.107194	antisense	0.122	1.62	0.531	0
MSTRG.108267	antisense	0	0	0.371	1.052
MSTRG.108549	antisense	7.109	1.429	3.937	8.473
MSTRG.108636	antisense	0.228	0	0.159	0.083
MSTRG.108643	antisense	0.211	0	2.897	0.156
MSTRG.108660	antisense	5.002	0	1.624	4.342
MSTRG.108865	antisense	1.245	2.985	6.93	1.889
MSTRG.108874	antisense	0	0.828	0.265	0.234
MSTRG.108922	antisense	0.301	0.783	2.059	0.859
MSTRG.108983	antisense	0.643	0.728	0.594	2.702
MSTRG.109060	antisense	0	0	0	0.689
MSTRG.109110	antisense	0.065	0	0.446	2.04
MSTRG.109113	antisense	4.417	3.421	2.568	2.192
MSTRG.109237	antisense	3.083	8.59	6.197	5.877
MSTRG.109331	antisense	0.089	0.018	0.127	0.244
MSTRG.109424	antisense	0	0	0.053	0.244
MSTRG.109428	antisense	0.122	0	0.159	0.868
MSTRG.109429	antisense	0.643	0.773	0.478	0.267
MSTRG.109954	antisense	0	3.185	0.233	0.221
MSTRG.109956	antisense	0.651	0	0.902	1.218
MSTRG.110005	antisense	0.317	0.619	1.199	0.997
MSTRG.110008	antisense	4.449	3.203	7.375	12.167
MSTRG.110012	antisense	0	0.045	2.865	3.883
MSTRG.110124	antisense	3.994	0.546	1.21	2.27
MSTRG.110138	antisense	0.317	0.055	0.096	0
MSTRG.11024	antisense	0	0	0.265	0.542
MSTRG.110392	antisense	0.317	0.546	0.732	0.859
MSTRG.110403	antisense	0.602	1.292	2.144	2.013
MSTRG.110527	antisense	2.156	2.575	7.842	6.291
MSTRG.110529	antisense	0	0	0.552	1.291
MSTRG.110743	antisense	0.057	0	0.658	0.822
MSTRG.110744	antisense	0.716	0	0	0.538
MSTRG.110773	antisense	1.301	1.137	4.33	5.229
MSTRG.110808	antisense	0	1.656	0.647	0.496
MSTRG.1109	antisense	0.163	1.911	4.001	0.51
MSTRG.110996	antisense	0.179	0	0.18	0.441
MSTRG.111031	antisense	6.133	6.634	2.027	3.35
MSTRG.111064	antisense	0.073	0.282	0.17	0.358
MSTRG.111066	antisense	1.879	7.261	2.876	8.937
MSTRG.111174	antisense	0	0	0.18	0.368
MSTRG.111182	antisense	0.163	0	0.52	0.864
MSTRG.111189	antisense	0.382	0	0.722	2.233
MSTRG.111308	antisense	1.415	1.201	0.541	0.248
MSTRG.111445	antisense	0.439	1.019	0.69	0.4
MSTRG.11161	antisense	0	0	1.868	1.13
MSTRG.111806	antisense	0.244	0.155	0.382	1.025
MSTRG.111911	antisense	0	0	0.106	0.147
MSTRG.111943	antisense	0.195	0.874	0.711	0.588
MSTRG.112021	antisense	0.431	0	0.488	0.299
MSTRG.112883	antisense	2.107	6.534	3.82	5.9
MSTRG.112887	antisense	5.979	2.539	9.583	10.398
MSTRG.112888	antisense	1.326	4.04	8.479	11.428
MSTRG.112892	antisense	0.399	2.466	0.775	1.65
MSTRG.112893	antisense	0.382	1.092	0.562	0.62
MSTRG.113263	antisense	1.643	2.029	1.73	1.558
MSTRG.113743	antisense	0.309	0.318	3.672	9.112
MSTRG.113801	antisense	0	0	0.159	0.119
MSTRG.113802	antisense	0	0	0.403	0.51
MSTRG.113982	antisense	1.277	0.182	1.804	1.93
MSTRG.114040	antisense	0.089	0.127	0.053	0.257
MSTRG.114044	antisense	7.654	3.139	19.112	14.332
MSTRG.114062	antisense	7.337	10.401	11.068	13.831
MSTRG.114094	antisense	0	0	0.159	0.101
MSTRG.114099	antisense	0	0	0.34	0.671
MSTRG.114127	antisense	0	0.173	0.552	0.671
MSTRG.114141	antisense	0.472	1.938	1.433	1.392
MSTRG.114142	antisense	0.049	0	0.117	0.294
MSTRG.114143	antisense	0.277	0.464	2.504	1.87
MSTRG.114186	antisense	0.545	0	0.191	0.473
MSTRG.114516	antisense	1.033	1.838	0.424	0.97
MSTRG.114966	antisense	0	0	0.011	0.005
MSTRG.115393	antisense	0.586	0.619	0.775	1.199
MSTRG.115727	antisense	0	2.612	0.127	0.28
MSTRG.115863	antisense	0	0	0.913	0
MSTRG.115998	antisense	2.774	1.292	1.677	1.668
MSTRG.11601	antisense	0	7.653	0	0
MSTRG.11605	antisense	1.765	4.058	4.043	5.67
MSTRG.11610	antisense	0.057	0	0.446	0.312
MSTRG.11611	antisense	0	8.381	1.019	0.859
MSTRG.116807	antisense	0.724	0	2.812	0.248
MSTRG.116823	antisense	0	1.747	0	0
MSTRG.116945	antisense	0	0	0.584	1.691
MSTRG.116946	antisense	0.203	0	7.11	0.836
MSTRG.116947	antisense	0.236	0.528	0.138	0.234
MSTRG.117148	antisense	0	0	0.074	0.051
MSTRG.117250	antisense	0.065	0.309	0.085	0.028
MSTRG.118680	antisense	2.749	0	2.664	2.463
MSTRG.118807	antisense	0.285	0.318	0.265	0.239
MSTRG.119092	antisense	0.569	1.993	0.552	0.951
MSTRG.119415	antisense	0.366	1.165	0.562	0.446
MSTRG.119952	antisense	1.139	0	0.138	0.101
MSTRG.120001	antisense	3.237	0	1.337	1.231
MSTRG.120003	antisense	0	0	0	0.028
MSTRG.120679	antisense	0.301	0.4	0.212	0.404
MSTRG.120705	antisense	1.367	9.6	2.526	2.394
MSTRG.120804	antisense	0.211	0	0.127	1.429
MSTRG.120862	antisense	0.545	0	0.244	0.57
MSTRG.121018	antisense	0	0	0.096	0.101
MSTRG.121352	antisense	0	0.828	0.287	0.409
MSTRG.121846	antisense	0.285	0	0.318	1.346
MSTRG.121913	antisense	0.285	1.683	0.064	0.515
MSTRG.122193	antisense	0	0	1.295	0.147
MSTRG.122521	antisense	0	0	0	0.06
MSTRG.122559	antisense	0.106	0.036	0.902	0.919
MSTRG.122612	antisense	0	0	0.35	0.289
MSTRG.122631	antisense	4.181	0.719	6.059	5.79
MSTRG.123029	antisense	0	0	0.106	0
MSTRG.123783	antisense	0	0	0.488	0.083
MSTRG.123859	antisense	0.285	1.092	0.276	0.703
MSTRG.123867	antisense	0	0	0.138	0.611
MSTRG.123917	antisense	0.22	0	0.159	0.404
MSTRG.123977	antisense	0	0.955	0	0
MSTRG.124152	antisense	0	0	0.287	0.083
MSTRG.124830	antisense	0	0	0	0.009
MSTRG.125236	antisense	0.228	0	0.764	0.133
MSTRG.125647	antisense	1.423	0	0.149	0.772
MSTRG.126688	antisense	0	0	0	0.023
MSTRG.1269	antisense	0.146	0.464	0.297	0.225
MSTRG.127129	antisense	1.074	0.619	0.488	0.487
MSTRG.127188	antisense	0.268	0	0.212	0
MSTRG.127799	antisense	0.325	0	0.308	0.225
MSTRG.127830	antisense	1.497	3.021	3.47	3.423
MSTRG.128313	antisense	30.462	5.851	15.865	10.077
MSTRG.128319	antisense	0.797	0	0.149	0.083
MSTRG.128355	antisense	0.244	0	1.231	0.023
MSTRG.12878	antisense	0.781	0.4	0.7	1.075
MSTRG.129023	antisense	7.052	6.788	3.661	4.191
MSTRG.129054	antisense	0.48	0.027	0.478	0.726
MSTRG.129185	antisense	2.05	5.778	0.276	1.645
MSTRG.129269	antisense	0	0	0.18	0.074
MSTRG.129406	antisense	10.623	10.965	3.704	3.285
MSTRG.12949	antisense	0	0	0	0.005
MSTRG.129641	antisense	1.09	0	2.876	0.63
MSTRG.129955	antisense	1.871	0	3.788	3.111
MSTRG.130051	antisense	1.074	2.739	1.22	1.282
MSTRG.130332	antisense	0	0	0.191	0
MSTRG.130502	antisense	2.066	2.784	1.401	1.879
MSTRG.130526	antisense	0	0	0.34	0.345
MSTRG.130579	antisense	14.723	80.204	58.578	8.956
MSTRG.130941	antisense	1.7	2.402	2.048	2.582
MSTRG.130983	antisense	2.57	3.886	4.054	3.938
MSTRG.130995	antisense	1.651	7.753	1.114	1.705
MSTRG.131037	antisense	0.382	1.829	4.362	0.115
MSTRG.131076	antisense	1.057	8.554	0.615	1.438
MSTRG.131091	antisense	3.262	0	0.456	0.142
MSTRG.131146	antisense	4.636	4.204	3.385	2.844
MSTRG.131237	antisense	3.05	4.941	5.815	5.142
MSTRG.131262	antisense	0.586	1.856	1.464	1.902
MSTRG.131289	antisense	0.089	0	0.212	0.602
MSTRG.131362	antisense	0	6.797	1.273	3.561
MSTRG.13145	antisense	0.268	0.282	0.233	0.317
MSTRG.131497	antisense	0.447	0	0.615	0.579
MSTRG.131540	antisense	0.325	0.628	0.287	0.051
MSTRG.131546	antisense	0	0	1.751	1.158
MSTRG.131619	antisense	0.073	0	0.902	0.409
MSTRG.131811	antisense	0	0	0.467	1.429
MSTRG.131826	antisense	0.87	3.057	5.635	6.217
MSTRG.131849	antisense	0.83	0	0	0.046
MSTRG.131853	antisense	6.629	0.946	1.624	1.916
MSTRG.131883	antisense	0.236	0.045	0.042	0.947
MSTRG.131917	antisense	0.155	1.711	1.38	0.818
MSTRG.131984	antisense	1.245	5.924	3.343	3.239
MSTRG.132222	antisense	0	0	0	0.115
MSTRG.132822	antisense	0	0	0	0.326
MSTRG.132823	antisense	0	0	0.074	0.051
MSTRG.132862	antisense	0	0	0.127	1.218
MSTRG.132915	antisense	0	0	0.191	0.625
MSTRG.132992	antisense	0	1.11	0.711	0.565
MSTRG.133021	antisense	2.522	53.706	30.117	58.613
MSTRG.133082	antisense	0	0	0.594	0.538
MSTRG.133083	antisense	1.716	3.585	1.857	4.848
MSTRG.133304	antisense	2.221	0.719	2.611	1.539
MSTRG.13351	antisense	0	6.534	0.785	1.489
MSTRG.133559	antisense	0	0	0.17	0.207
MSTRG.13358	antisense	2.09	0.701	1.104	2.412
MSTRG.13361	antisense	0.065	0.801	1.464	1.875
MSTRG.133621	antisense	0	1.465	0.18	0.712
MSTRG.133658	antisense	0	0	0.096	0.129
MSTRG.133758	antisense	0.008	0.428	0.287	0.45
MSTRG.134111	antisense	0.447	0.528	0.456	0.951
MSTRG.134229	antisense	0.805	0	0	0.069
MSTRG.134326	antisense	0.244	0.855	1.178	1.709
MSTRG.134466	antisense	0.504	0.992	0.923	0.974
MSTRG.134487	antisense	0.065	0.182	0.615	0.887
MSTRG.134545	antisense	0	0	0.053	0
MSTRG.135123	antisense	0	3.176	0.403	1.204
MSTRG.135158	antisense	0.797	0.419	1.231	1.42
MSTRG.135298	antisense	0.171	0.036	2.749	0.133
MSTRG.135368	antisense	0	0.546	0.329	0.85
MSTRG.13590	antisense	0	0	1.348	2.821
MSTRG.136070	antisense	0.594	1.611	0.923	1.374
MSTRG.136203	antisense	0	0	0.456	0.597
MSTRG.136234	antisense	3.058	1.256	0.998	1.245
MSTRG.136276	antisense	0.065	0.582	0.658	0.473
MSTRG.136279	antisense	0.878	0.255	1.496	0.767
MSTRG.136302	antisense	0.171	2.939	0.096	0
MSTRG.136680	antisense	1.716	1.674	0.276	0.409
MSTRG.136692	antisense	0	0	0.276	0.423
MSTRG.136755	antisense	0.659	0.937	0.329	0.533
MSTRG.137457	antisense	1.554	2.011	0.287	1.038
MSTRG.138068	antisense	0.163	0.309	0.371	0.267
MSTRG.138478	antisense	0.83	0	0.732	1.76
MSTRG.138531	antisense	0	0	0.042	0.138
MSTRG.138885	antisense	0.342	0	0.34	0.326
MSTRG.138992	antisense	0	0	0.414	0.193
MSTRG.139028	antisense	4.636	0	4.149	1.797
MSTRG.139308	antisense	0	0	0.011	0
MSTRG.139608	antisense	0.024	0.5	0.223	0.455
MSTRG.139684	antisense	0.309	0.955	1.082	0.712
MSTRG.139700	antisense	0	0	4.574	0.896
MSTRG.139929	antisense	0	2.366	0.106	0.069
MSTRG.140101	antisense	4.335	18.099	10.601	11.662
MSTRG.140262	antisense	8.63	15.442	11.716	12.815
MSTRG.140398	antisense	0	1.11	0.17	0.211
MSTRG.140455	antisense	0	0	0.35	0.331
MSTRG.140563	antisense	0	0	0.308	0.216
MSTRG.140640	antisense	0.155	0	2.175	0.129
MSTRG.141167	antisense	0.22	0.091	0.541	0.74
MSTRG.142185	antisense	0.016	0.118	0.233	0.184
MSTRG.14243	antisense	0	0	0	0.119
MSTRG.142750	antisense	0.252	0.045	0.722	0.813
MSTRG.142752	antisense	0.586	0	0.467	2.578
MSTRG.1428	antisense	0.033	0	0.244	0.294
MSTRG.142895	antisense	1.724	10.028	3.746	1.034
MSTRG.142897	antisense	0.854	2.53	4.054	0.496
MSTRG.142899	antisense	0	0	0	0.078
MSTRG.142905	antisense	8.671	6.961	11.174	8.965
MSTRG.142934	antisense	0.618	0.3	0.86	0.919
MSTRG.143417	antisense	0.122	0.965	0.223	0.496
MSTRG.143477	antisense	0.089	0	0.318	0.175
MSTRG.143532	antisense	1.985	1.374	0.265	0.317
MSTRG.143555	antisense	0	0.628	0.042	1.406
MSTRG.14404	antisense	0.472	0	0.424	0.299
MSTRG.144178	antisense	0.797	0.755	2.398	2.164
MSTRG.144190	antisense	0	0	0.393	0
MSTRG.144276	antisense	0.317	0.928	0.191	0.354
MSTRG.144417	antisense	0.041	0.382	0.074	0.924
MSTRG.144456	antisense	0.813	0.728	0.424	0.63
MSTRG.1445	antisense	0	0	0.17	0.041
MSTRG.144585	antisense	0.024	0	0.212	0.234
MSTRG.145053	antisense	2.961	0.864	8.903	13.381
MSTRG.145227	antisense	0	0	0.371	1.31
MSTRG.145657	antisense	2.562	6.679	2.727	3.57
MSTRG.145818	antisense	1.342	3.431	2.154	2.808
MSTRG.146265	antisense	7.264	4.996	2.133	3.782
MSTRG.146336	antisense	1.611	2.302	2.557	2.918
MSTRG.146341	antisense	0.277	0	1.051	0.317
MSTRG.14638	antisense	0.415	0.619	0.584	0.767
MSTRG.146400	antisense	1.464	2.712	1.22	3.12
MSTRG.146491	antisense	2.058	0	0.117	0.092
MSTRG.146662	antisense	2.156	1.438	3.205	4.889
MSTRG.146743	antisense	2.619	3.822	3.077	4.273
MSTRG.146805	antisense	0.838	0.646	0.467	1.843
MSTRG.146936	antisense	0.895	1.547	1.316	1.544
MSTRG.146950	antisense	0.586	0.064	1.167	1.103
MSTRG.147048	antisense	0.431	1.192	0.042	0.28
MSTRG.147097	antisense	0.39	2.148	0.499	0.754
MSTRG.147134	antisense	0.122	0.728	0.021	0.129
MSTRG.147140	antisense	1.44	0	1.125	1.755
MSTRG.147340	antisense	1.179	0.61	1.316	1.466
MSTRG.147519	antisense	0	0	0	0.216
MSTRG.147628	antisense	0	0	0.828	1.516
MSTRG.147810	antisense	0.952	0	0	0
MSTRG.147846	antisense	1.31	2.875	0.796	0.68
MSTRG.147885	antisense	0.155	0	0.573	0.207
MSTRG.148073	antisense	0	0	0.191	0.028
MSTRG.148145	antisense	0	9.191	0	0.147
MSTRG.148237	antisense	9.403	6.015	4.733	4.829
MSTRG.148312	antisense	0.984	17.844	13.965	29.638
MSTRG.148322	antisense	2.522	3.33	3.82	3.97
MSTRG.148509	antisense	0.35	0.209	0.605	2.132
MSTRG.148512	antisense	1.334	2.148	2.685	3.91
MSTRG.148529	antisense	0.7	2.357	1.921	2.679
MSTRG.148569	antisense	0	0	0.647	0.34
MSTRG.148658	antisense	1.285	0.755	1.762	2.022
MSTRG.148669	antisense	1.057	1.875	1.698	2.137
MSTRG.148810	antisense	0.041	0	0.032	0.147
MSTRG.149312	antisense	0	0	0.308	0.028
MSTRG.149757	antisense	0	0	0.096	0.207
MSTRG.149761	antisense	0	3.585	0.318	0.57
MSTRG.149989	antisense	0.366	0.318	1.411	1.424
MSTRG.150530	antisense	0.073	0.2	1.135	0.377
MSTRG.151279	antisense	0	0.955	0.732	1.158
MSTRG.151390	antisense	0.976	0.655	0.361	0.997
MSTRG.151570	antisense	1.968	6.115	2.961	2.941
MSTRG.151587	antisense	0.691	6.215	2.069	4.577
MSTRG.151594	antisense	5.303	7.562	3.757	7.582
MSTRG.151679	antisense	0.228	0.928	0.764	0.703
MSTRG.152466	antisense	0	0.018	0.011	0
MSTRG.152724	antisense	0.756	1.774	1.242	1.369
MSTRG.153013	antisense	0	0	0	0.377
MSTRG.15305	antisense	0	0	0.202	1.13
MSTRG.153084	antisense	0.146	0.118	0.382	0.551
MSTRG.153706	antisense	0.333	1.056	0.191	0.06
MSTRG.15397	antisense	1.35	3.613	2.653	2.748
MSTRG.154107	antisense	0	11.584	1.677	2.702
MSTRG.154242	antisense	0.033	0	0.042	0
MSTRG.154512	antisense	0	0	0.138	0.078
MSTRG.154776	antisense	0.87	0.045	1.22	1.461
MSTRG.155043	antisense	0.984	2.739	2.218	1.907
MSTRG.156171	antisense	0.358	0	0.424	0.179
MSTRG.156245	antisense	0.244	0	0.69	2.091
MSTRG.156258	antisense	0.537	0	0	0.028
MSTRG.156299	antisense	0	0	0.828	0.717
MSTRG.15649	antisense	4.157	2.202	1.008	0.616
MSTRG.15650	antisense	0	0	0.329	0.28
MSTRG.156572	antisense	0.317	0.1	0.562	0.657
MSTRG.156593	antisense	0	0	0.233	0.055
MSTRG.156594	antisense	0	0	0.265	0.216
MSTRG.156628	antisense	0.171	0.109	0.297	0.317
MSTRG.156763	antisense	0	0	0.202	0.124
MSTRG.156769	antisense	1.773	7.325	1.592	2.334
MSTRG.156787	antisense	1.456	0.992	1.549	1.902
MSTRG.156798	antisense	2.383	2.639	5.433	3.768
MSTRG.156887	antisense	0.057	0	0.605	0.905
MSTRG.156942	antisense	0	0.846	0.053	0
MSTRG.157324	antisense	0.098	0.055	0.732	0.726
MSTRG.157414	antisense	0	0	0.138	0
MSTRG.157431	antisense	0	0	0.074	0.712
MSTRG.157498	antisense	0.944	0.992	0.796	1.815
MSTRG.157530	antisense	2.188	0.892	3.417	5.358
MSTRG.157895	antisense	0.976	1.556	1.21	1.098
MSTRG.158223	antisense	0.797	0	0.064	0.046
MSTRG.158315	antisense	0	0	1.549	1.277
MSTRG.158320	antisense	0	0	0	3.042
MSTRG.158534	antisense	0	0	0.403	0
MSTRG.158851	antisense	0	0.419	1.231	0.285
MSTRG.158865	antisense	1.676	5.269	6.357	5.666
MSTRG.159304	antisense	0	0	0.637	0.074
MSTRG.159470	antisense	3.563	3.303	5.348	4.705
MSTRG.159611	antisense	0.228	1.647	0.308	0.878
MSTRG.159665	antisense	0.48	1.21	1.348	1.571
MSTRG.159882	antisense	0	0.409	0	0
MSTRG.160010	antisense	2.823	7.762	1.486	2.44
MSTRG.160075	antisense	2.09	2.548	1.921	2.752
MSTRG.160256	antisense	1.594	2.73	1.9	2.256
MSTRG.160259	antisense	0.895	1.511	2.759	5.693
MSTRG.160404	antisense	0	0	1.263	0.046
MSTRG.160461	antisense	0	0	0.435	0.216
MSTRG.160785	antisense	6.052	19.155	6.654	9.245
MSTRG.160972	antisense	0.374	2.02	3.587	9.507
MSTRG.16099	antisense	0.268	3.403	2.961	1.181
MSTRG.16109	antisense	10.233	26.889	25.023	27.253
MSTRG.16116	antisense	13.21	21.184	22.784	28.029
MSTRG.16117	antisense	0.496	5.514	1.539	1.346
MSTRG.16118	antisense	2.31	2.648	43.923	7.085
MSTRG.161198	antisense	0	0	0	0.17
MSTRG.16131	antisense	0.333	0.901	0.318	0.368
MSTRG.161370	antisense	2.814	2.238	3.077	3.547
MSTRG.16139	antisense	0.74	2.311	2.006	2.104
MSTRG.161394	antisense	0	1.001	3.067	1.741
MSTRG.16150	antisense	3.107	13.413	8.543	17.502
MSTRG.161636	antisense	0	0.127	0	0.005
MSTRG.161790	antisense	0	0	0.18	0.234
MSTRG.161970	antisense	2.644	6.069	1.857	3.157
MSTRG.162020	antisense	1.692	0	0.106	0.308
MSTRG.162108	antisense	2.269	1.729	1.157	0.914
MSTRG.162118	antisense	7.5	19	10.591	12.7
MSTRG.162120	antisense	0.659	1.52	21.245	1.893
MSTRG.162196	antisense	0.374	0	0	0
MSTRG.162279	antisense	1.537	0.955	2.175	1.493
MSTRG.162579	antisense	1.131	0	0.478	0.124
MSTRG.162580	antisense	1.009	0.51	0.86	1.167
MSTRG.162665	antisense	0.634	1.046	1.189	1.397
MSTRG.162782	antisense	0.984	2.803	12.968	2.605
MSTRG.162905	antisense	0.602	0	0.52	0.74
MSTRG.163427	antisense	1.44	2.266	1.072	1.103
MSTRG.163665	antisense	1.586	2.557	2.059	2.1
MSTRG.163668	antisense	0	1.683	0.127	0.188
MSTRG.163904	antisense	0.22	0	0.297	0.257
MSTRG.163920	antisense	1.358	0	0.202	0.032
MSTRG.164196	antisense	0	0	0.117	0.064
MSTRG.164558	antisense	3.01	4.077	6.505	8.795
MSTRG.164834	antisense	0.268	0	0.923	0.124
MSTRG.1649	antisense	0.447	0.136	2.78	1.282
MSTRG.165004	antisense	0.195	0.218	0.669	0.335
MSTRG.1651	antisense	0	0	0.085	0.046
MSTRG.165210	antisense	0	0	0.647	0
MSTRG.165647	antisense	5.686	6.024	2.345	4.655
MSTRG.165833	antisense	0	0.209	0.106	0.345
MSTRG.165839	antisense	0.984	0.346	2.441	3.299
MSTRG.165880	antisense	0	0	0	0.096
MSTRG.166225	antisense	5.149	7.826	8.67	5.519
MSTRG.166516	antisense	0.081	1.019	0.446	2.775
MSTRG.166517	antisense	0.765	1.292	1.199	1.824
MSTRG.166779	antisense	0	0	0	0.101
MSTRG.166787	antisense	0.342	0	0.998	1.714
MSTRG.16700	antisense	0.39	0	1.762	0.184
MSTRG.167005	antisense	0.081	0.792	1.454	0.533
MSTRG.167456	antisense	0.098	0.764	1.114	1.273
MSTRG.167556	antisense	1.879	2.548	8.352	4.93
MSTRG.167843	antisense	1.448	0.428	1.21	1.296
MSTRG.167969	antisense	0.236	0.073	0.732	0.312
MSTRG.167971	antisense	0.35	0.428	1.082	0.818
MSTRG.168103	antisense	0.732	0.155	1.072	0.675
MSTRG.168885	antisense	4.059	0	3.958	2.261
MSTRG.168962	antisense	0.089	0.455	0.573	0.602
MSTRG.16903	antisense	1.025	0.364	1.645	1.728
MSTRG.169559	antisense	0	0	3.364	0.717
MSTRG.169564	antisense	0.456	0	0.042	0.101
MSTRG.170210	antisense	0.895	2.775	2.409	2.536
MSTRG.170703	antisense	0	0	0	0.092
MSTRG.170705	antisense	2.871	2.73	2.727	2.32
MSTRG.170833	antisense	0.407	0.5	0.191	0.184
MSTRG.171056	antisense	0.667	1.847	0.223	0.156
MSTRG.171065	antisense	0.187	0	2.038	0.326
MSTRG.171074	antisense	4.197	3.904	1.284	2.734
MSTRG.171443	antisense	3.335	7.789	7.195	4.338
MSTRG.171846	antisense	2.09	6.024	7.099	5.321
MSTRG.172660	antisense	1.887	0.773	0.17	1.011
MSTRG.172942	antisense	4.091	3.194	2.812	4.168
MSTRG.172949	antisense	0	0	1.019	0.087
MSTRG.173130	antisense	0	0	0.053	0
MSTRG.173184	antisense	0.089	0	0.191	0.083
MSTRG.173510	antisense	0.309	2.739	0.552	0.473
MSTRG.173556	antisense	0.325	0.828	0.191	0.184
MSTRG.173820	antisense	0	0	0.562	1.392
MSTRG.173941	antisense	0	0	0.17	0.28
MSTRG.174447	antisense	0.252	1.028	0.276	0.579
MSTRG.174605	antisense	0	1.119	0.127	0
MSTRG.174607	antisense	0	0	0.074	0.101
MSTRG.174610	antisense	5.011	4.058	1.783	1.48
MSTRG.17505	antisense	0	0	0	0.17
MSTRG.175425	antisense	2.424	3.795	1.687	2.146
MSTRG.175777	antisense	1.31	0.464	1.167	3.023
MSTRG.175779	antisense	0.187	0.127	0.849	0.652
MSTRG.175909	antisense	0.805	0	0.849	0.556
MSTRG.175984	antisense	2.701	1.565	2.833	3.138
MSTRG.176017	antisense	2.562	1.21	2.929	3.814
MSTRG.176506	antisense	4.946	8.49	14.974	8.041
MSTRG.176532	antisense	1.855	1.438	0.52	0.505
MSTRG.176986	antisense	3.254	5.187	2.409	4.131
MSTRG.176988	antisense	0.724	2.357	2.027	0.822
MSTRG.177174	antisense	0.366	0.409	0.053	0.009
MSTRG.177332	antisense	0.561	5.432	0.435	2.054
MSTRG.177692	antisense	0	0	0.276	0.354
MSTRG.177705	antisense	0.382	0	0.244	0.133
MSTRG.178038	antisense	0	0	0.042	0.271
MSTRG.178208	antisense	0.016	0.355	0.127	0.138
MSTRG.178238	antisense	0.96	1.547	5.019	1.852
MSTRG.178898	antisense	0.423	0.746	0.923	1.365
MSTRG.179061	antisense	0.073	0	29.99	1.066
MSTRG.179102	antisense	0	0	0.021	0.023
MSTRG.179174	antisense	0	0	0.053	0.11
MSTRG.179175	antisense	0	0	0.085	0.404
MSTRG.179182	antisense	0.724	1.665	0.562	0.037
MSTRG.179183	antisense	2.164	3.412	4.033	3.892
MSTRG.179184	antisense	0.041	0.055	0.106	0.193
MSTRG.179324	antisense	0.765	0.883	1.846	1.764
MSTRG.179403	antisense	1.204	0	1.846	2.045
MSTRG.179479	antisense	0	0	0.424	1.015
MSTRG.179518	antisense	2.221	3.458	4.584	2.435
MSTRG.179658	antisense	0	0	0.17	0.133
MSTRG.180511	antisense	0.203	0	0.149	0.101
MSTRG.180534	antisense	0	0	0.531	0.818
MSTRG.180547	antisense	2.375	2.302	1.496	3.001
MSTRG.180550	antisense	0.447	0	1.963	2.109
MSTRG.180575	antisense	0.309	0	0.106	0.616
MSTRG.180693	antisense	2.172	2.703	0.329	0
MSTRG.180694	antisense	1.123	0	0.17	0.244
MSTRG.180869	antisense	0	1.156	0	0.129
MSTRG.180873	antisense	0.073	1.119	0.828	0.515
MSTRG.181020	antisense	0	0	0.106	0.142
MSTRG.181226	antisense	6.572	23.823	6.187	7.044
MSTRG.181238	antisense	0.903	0	0.913	1.14
MSTRG.181312	antisense	0	18.463	3.385	0.124
MSTRG.182261	antisense	0.146	5.833	1.454	1.884
MSTRG.182488	antisense	0.277	2.339	0.202	1.461
MSTRG.182620	antisense	0	0.082	0.244	0.634
MSTRG.182733	antisense	0.342	0	0.085	0.092
MSTRG.182896	antisense	2.253	0.728	0.743	0.942
MSTRG.183119	antisense	0	0	0.934	2.247
MSTRG.183332	antisense	0.358	2.475	0.297	2.895
MSTRG.183688	antisense	0	0.2	0.435	0.138
MSTRG.184262	antisense	3.709	5.897	8.055	9.383
MSTRG.184479	antisense	1.285	2.275	1.284	1.617
MSTRG.184499	antisense	0	0	0.308	0.588
MSTRG.184811	antisense	1.269	0	0.509	0.303
MSTRG.185340	antisense	0.952	2.229	0.106	0.822
MSTRG.185341	antisense	0.643	0.619	0	0.276
MSTRG.185563	antisense	0.439	0	0.987	0.524
MSTRG.185876	antisense	0	7.771	2.961	0.244
MSTRG.186176	antisense	1.391	0	0.753	0.409
MSTRG.186557	antisense	2.92	0	0.202	0.409
MSTRG.187066	antisense	0	0	0.085	0.074
MSTRG.187078	antisense	0.667	0.118	0.106	0.055
MSTRG.18763	antisense	0	1.756	0.775	0.179
MSTRG.18785	antisense	0	0	0	0.032
MSTRG.187974	antisense	0	0	0.074	0.092
MSTRG.188085	antisense	1.855	1.283	0.244	0.239
MSTRG.188105	antisense	0.464	0.428	0.159	0.216
MSTRG.18857	antisense	0	9.263	1.061	0.023
MSTRG.188781	antisense	0	0.692	0.042	0.023
MSTRG.189104	antisense	0	5.542	0.849	1.838
MSTRG.189211	antisense	1.985	0	0	0.331
MSTRG.189457	antisense	0.594	0	0.053	0.032
MSTRG.189523	antisense	0	1.574	0	0.731
MSTRG.189766	antisense	0.033	0	0.096	0.106
MSTRG.189992	antisense	0	0.055	0.244	0.464
MSTRG.190120	antisense	5.214	13.586	5.508	9.801
MSTRG.190188	antisense	0	0	0.743	0.156
MSTRG.190223	antisense	0	0.064	0.403	0.524
MSTRG.190415	antisense	0	0	0.064	0
MSTRG.190546	antisense	0.765	0	0.064	0.267
MSTRG.19161	antisense	0	0	0.127	0.184
MSTRG.192146	antisense	9.858	0	1.571	5.62
MSTRG.192315	antisense	0.073	0	0.371	0.487
MSTRG.192684	antisense	0.683	7.644	2.579	1.797
MSTRG.193237	antisense	4.165	6.47	221.78	9.516
MSTRG.193363	antisense	1.578	4.541	0.732	1.746
MSTRG.194028	antisense	0.382	0	0.106	0
MSTRG.194834	antisense	5.71	3.694	2.494	2.297
MSTRG.195249	antisense	0.691	1.729	1.146	1.3
MSTRG.19551	antisense	0.211	6.897	0.318	2.215
MSTRG.195678	antisense	0	0	1.942	0.055
MSTRG.195824	antisense	1.692	0.027	1.655	1.769
MSTRG.197098	antisense	16.276	3.458	6.749	20.535
MSTRG.197508	antisense	0	0	0	0.023
MSTRG.197593	antisense	4.848	0.209	3.311	2.44
MSTRG.19865	antisense	1.562	1.028	1.263	0.91
MSTRG.199440	antisense	0	0	1.029	0.064
MSTRG.20006	antisense	0.464	0.227	0.18	1.011
MSTRG.20014	antisense	1.057	0	4.51	0.62
MSTRG.200611	antisense	0.952	0	0.743	0.441
MSTRG.200677	antisense	0	0	0.021	0.032
MSTRG.20135	antisense	0.26	0	0	0.68
MSTRG.202069	antisense	0	0	1.846	0.083
MSTRG.20219	antisense	0	0	0.329	0.993
MSTRG.202403	antisense	1.326	4.213	0.393	0.896
MSTRG.202566	antisense	1.114	1.756	0.891	1.075
MSTRG.20282	antisense	0	0	0.127	0
MSTRG.20293	antisense	1.318	0	0.966	2.399
MSTRG.203359	antisense	0	0.146	0	0.175
MSTRG.203443	antisense	0	0	0.605	0.216
MSTRG.204335	antisense	0	1.556	0.509	1.222
MSTRG.20484	antisense	0	0	0.233	0
MSTRG.205672	antisense	2.497	6.279	2.462	4.443
MSTRG.205873	antisense	14.674	2.448	9.551	8.96
MSTRG.205928	antisense	0.39	0	1.793	7.127
MSTRG.206638	antisense	0	2.621	0	0
MSTRG.207133	antisense	2.432	5.141	3.109	5.11
MSTRG.207324	antisense	8.525	5.596	151.497	1.466
MSTRG.207979	antisense	0.309	1.265	1.56	2.426
MSTRG.208399	antisense	0	0.719	0	0.06
MSTRG.208890	antisense	0	0	0	0.078
MSTRG.20949	antisense	0.96	0	0.276	0.262
MSTRG.209742	antisense	0.309	0	0.265	0.106
MSTRG.210062	antisense	0.155	0.227	0.138	0.041
MSTRG.210181	antisense	0	0	1.815	0.069
MSTRG.210530	antisense	0	0	1.56	0.501
MSTRG.210531	antisense	0	0	0.509	0.515
MSTRG.21058	antisense	0.049	0	1.539	1.916
MSTRG.210642	antisense	0	0	0.17	0.216
MSTRG.21065	antisense	0.211	0	0	0.087
MSTRG.210871	antisense	0	0	0.202	0.675
MSTRG.210957	antisense	0.114	0	0	0.349
MSTRG.211122	antisense	0	3.34	0	0
MSTRG.211123	antisense	0	0	0.127	0.381
MSTRG.21172	antisense	2.725	0	1.443	1.558
MSTRG.211981	antisense	0	1.565	0	0.087
MSTRG.212234	antisense	0	0	0.042	0.055
MSTRG.212354	antisense	0	0	0.605	1.512
MSTRG.212374	antisense	0.325	0	1.836	0.289
MSTRG.213087	antisense	0.512	0	0.18	0.611
MSTRG.213089	antisense	0.008	0.255	0.149	0.34
MSTRG.213478	antisense	0.195	1.41	2.865	3.419
MSTRG.21348	antisense	1.399	0	1.518	0.841
MSTRG.21440	antisense	1.423	0.901	1.273	1.7
MSTRG.214428	antisense	0	0.246	0.382	1.268
MSTRG.21476	antisense	0.057	0.937	0.244	0.345
MSTRG.21477	antisense	0.765	1.028	1.104	1.383
MSTRG.215607	antisense	2.391	3.294	1.199	1.204
MSTRG.215656	antisense	0	1.065	0.52	0.487
MSTRG.215752	antisense	0	0	0.042	0
MSTRG.21620	antisense	0.211	0.391	0.17	0.234
MSTRG.21649	antisense	0.569	0	1.093	0.901
MSTRG.21706	antisense	0.114	0.273	0.159	0.193
MSTRG.21708	antisense	0.041	0	0.064	0.101
MSTRG.21734	antisense	0	0	0	0.487
MSTRG.217503	antisense	0.179	0	3.205	1.356
MSTRG.217535	antisense	0	0	0.085	0.023
MSTRG.217750	antisense	1.358	0	5.168	5.932
MSTRG.217751	antisense	0.285	0.328	1.135	1.925
MSTRG.218634	antisense	0	0.3	0.276	0.464
MSTRG.218841	antisense	0.024	0.164	0.191	0.312
MSTRG.218889	antisense	0.146	0	0.329	0.051
MSTRG.218950	antisense	0	0	0	0.221
MSTRG.218951	antisense	0	0	0	0.032
MSTRG.21974	antisense	0	0	0.074	0.069
MSTRG.22346	antisense	0	0	0.042	0.11
MSTRG.22387	antisense	0	0.055	0.499	0.561
MSTRG.22996	antisense	1.871	2.511	2.621	3.529
MSTRG.23068	antisense	0.716	3.012	1.178	1.186
MSTRG.23347	antisense	0.944	0.118	0.255	0.409
MSTRG.23775	antisense	2.481	2.129	2.006	2.504
MSTRG.23960	antisense	0	0	0.361	0.179
MSTRG.24220	antisense	0	0	1.931	0
MSTRG.24227	antisense	1.586	2.812	2.154	2.104
MSTRG.24290	antisense	0.789	1.765	1.496	2.385
MSTRG.24413	antisense	0	0	0.085	0
MSTRG.24751	antisense	1.236	1.329	1.252	1.259
MSTRG.2486	antisense	1.399	1.265	0.531	0.795
MSTRG.24962	antisense	0.504	2.703	1.496	1.346
MSTRG.25013	antisense	0.089	0.064	0.414	0.662
MSTRG.25285	antisense	0.992	1.738	2.091	1.576
MSTRG.25286	antisense	0.211	0	0.891	1.08
MSTRG.25287	antisense	0	0	0.085	0.023
MSTRG.2559	antisense	0.659	0	0.053	0.331
MSTRG.2576	antisense	0.748	3.176	2.717	3.083
MSTRG.26123	antisense	0	0	3.863	4.779
MSTRG.26124	antisense	5.116	3.185	6.739	6.272
MSTRG.26507	antisense	0	0	0.074	0.028
MSTRG.26696	antisense	4.173	0	3.555	5.018
MSTRG.26700	antisense	0.285	0.173	1.135	0.579
MSTRG.26780	antisense	0.138	0.064	0.17	0.377
MSTRG.27133	antisense	1.123	4.905	1.369	2.348
MSTRG.27188	antisense	0	0	0.085	0.142
MSTRG.27189	antisense	0	0	0.106	0.165
MSTRG.2756	antisense	0.106	0	0.594	0.446
MSTRG.27631	antisense	0	0	0.287	0.593
MSTRG.2840	antisense	0.171	0	0.255	0.51
MSTRG.28555	antisense	0	0	0.244	0.308
MSTRG.2933	antisense	0.277	0.71	0.233	0.303
MSTRG.29364	antisense	0	0.955	0	0.023
MSTRG.29384	antisense	0.163	0	1.104	0.813
MSTRG.29507	antisense	0.805	0	7.704	8.004
MSTRG.29508	antisense	0.39	0	1.592	0.322
MSTRG.2967	antisense	0.578	2.411	0.393	0.482
MSTRG.29722	antisense	1.228	0.783	0.913	1.029
MSTRG.29771	antisense	18.513	14.25	13.923	20.673
MSTRG.29778	antisense	0.423	2.757	3.863	0.317
MSTRG.29789	antisense	1.074	2.666	2.685	2.647
MSTRG.30162	antisense	1.529	0	0.414	1.374
MSTRG.30201	antisense	0.643	0	0.096	0.064
MSTRG.30325	antisense	1.611	0	1.22	0.455
MSTRG.30423	antisense	1.269	0	0.849	0.119
MSTRG.30599	antisense	3.408	8.472	1.762	3.933
MSTRG.30733	antisense	0	0	0.127	0.074
MSTRG.30758	antisense	0	1.683	0.17	0.074
MSTRG.30862	antisense	5.8	3.394	2.122	2.688
MSTRG.31167	antisense	0.903	1.356	0.594	1.126
MSTRG.31605	antisense	0	0	0.021	0.115
MSTRG.31606	antisense	0	1.811	0.042	0.289
MSTRG.31607	antisense	0	0	0.318	0.198
MSTRG.33737	antisense	0	1.811	0.318	0.267
MSTRG.33898	antisense	2.237	2.193	3.82	5.785
MSTRG.34464	antisense	0.317	0	0.159	0.106
MSTRG.34511	antisense	0	0	0.149	0.372
MSTRG.34532	antisense	0	0.164	0.287	0.689
MSTRG.34550	antisense	0.578	0	2.886	8.11
MSTRG.34608	antisense	0.683	0.419	1.22	2.546
MSTRG.34610	antisense	0.285	0	0.17	0.542
MSTRG.34650	antisense	0.521	0.136	0.955	0.79
MSTRG.34787	antisense	0	0	0.042	0.822
MSTRG.34898	antisense	0	0	0.998	0.299
MSTRG.34975	antisense	0	0	0.838	0.735
MSTRG.35089	antisense	0	0	0.647	0.262
MSTRG.35169	antisense	0.309	0.692	0.584	1.222
MSTRG.35198	antisense	1.261	1.993	2.42	2.729
MSTRG.35246	antisense	0.748	0.491	0.7	0.588
MSTRG.35248	antisense	0	0	0.329	0.175
MSTRG.35273	antisense	1.781	5.141	0.944	1.939
MSTRG.35307	antisense	2.627	7.061	1.252	1.608
MSTRG.35308	antisense	4.254	6.124	1.507	4.296
MSTRG.35322	antisense	0.171	1.001	0.679	1.011
MSTRG.35342	antisense	1.993	0	2.43	2.982
MSTRG.35868	antisense	0.301	0	0	0.064
MSTRG.35871	antisense	0.944	0	0.393	0.634
MSTRG.35953	antisense	0	0	0	0.064
MSTRG.35972	antisense	0	0	4.478	0.63
MSTRG.36053	antisense	0.724	1.256	0	0.046
MSTRG.36123	antisense	2.318	0.555	0.944	2.072
MSTRG.36248	antisense	0.456	0	0.424	0.312
MSTRG.36411	antisense	0	0	0.106	0.037
MSTRG.36446	antisense	5.913	4.104	2.324	3.074
MSTRG.36451	antisense	2.928	0	0.149	0.092
MSTRG.36557	antisense	1.667	0	0	3.864
MSTRG.36688	antisense	0	0	0.467	0
MSTRG.36720	antisense	0	14.004	2.717	0.216
MSTRG.36727	antisense	0.415	0	0.202	0.193
MSTRG.36732	antisense	0	0	0.34	0.326
MSTRG.37012	antisense	31.666	12.166	24.694	18.895
MSTRG.37133	antisense	0.854	1.201	0.944	1.075
MSTRG.37274	antisense	0	0	0	0.234
MSTRG.38042	antisense	0	0	1.061	0.505
MSTRG.38132	antisense	0	0	0.244	0.156
MSTRG.38221	antisense	5.621	2.193	4.224	6.07
MSTRG.38240	antisense	2.099	11.811	1.655	1.489
MSTRG.38377	antisense	0	0	0.233	0.317
MSTRG.38466	antisense	0.171	0	0.796	0.087
MSTRG.38620	antisense	0	0	0.149	0.101
MSTRG.38986	antisense	0.179	0	0.159	0.289
MSTRG.39078	antisense	0	0	2.048	0.459
MSTRG.39250	antisense	1.131	0	0.042	0.643
MSTRG.39256	antisense	0.211	0.555	0.318	0.289
MSTRG.39281	antisense	0	0	2.292	0.326
MSTRG.39439	antisense	3.083	0	2.069	2.803
MSTRG.39722	antisense	0.057	0	0.499	0.542
MSTRG.39731	antisense	0	0	0	0.267
MSTRG.39752	antisense	0.431	0.965	1.549	1.213
MSTRG.39760	antisense	0.578	1.165	0.753	1.567
MSTRG.39779	antisense	2.261	2.393	5.826	7.89
MSTRG.39865	antisense	0	0	0.796	1.599
MSTRG.39909	antisense	0.504	1.665	2.271	5.243
MSTRG.39918	antisense	0.708	0	0.159	0.055
MSTRG.39997	antisense	1.057	0.755	0.881	1.654
MSTRG.40084	antisense	0	0	0.096	0.119
MSTRG.40233	antisense	0	2.857	1.072	0.859
MSTRG.40236	antisense	0	0	3.842	5.923
MSTRG.40574	antisense	0.342	0	1.263	0.524
MSTRG.40585	antisense	0.578	1.183	1.061	1.769
MSTRG.40592	antisense	0.179	0.419	0.467	0.639
MSTRG.40619	antisense	18.204	4.331	3.555	3.616
MSTRG.40621	antisense	0	0	0.446	1.006
MSTRG.40654	antisense	0.447	0.901	0.509	0.726
MSTRG.407	antisense	0	0	0.011	0.308
MSTRG.41265	antisense	0	1.511	0.106	0.175
MSTRG.41454	antisense	0	0	0.18	0.289
MSTRG.41665	antisense	0	0	0.541	0.675
MSTRG.41914	antisense	0	0	0.085	0.064
MSTRG.41955	antisense	0	0	6.24	1.576
MSTRG.42324	antisense	0	0	0.032	0.23
MSTRG.42327	antisense	0	0	0.074	0.257
MSTRG.42758	antisense	3.384	0	0.976	0
MSTRG.43005	antisense	1.855	1.829	5.412	3.019
MSTRG.43166	antisense	1.912	13.331	4.489	5.762
MSTRG.43367	antisense	0.504	0.528	0.923	1.282
MSTRG.43465	antisense	1.236	3.076	1.061	1.65
MSTRG.43744	antisense	0.163	1.893	2.292	0.244
MSTRG.43968	antisense	0	2.066	3.173	0.662
MSTRG.44221	antisense	0.61	1.247	1.38	3.092
MSTRG.44395	antisense	0	0	1.762	0.161
MSTRG.448	antisense	0.529	0.491	0.223	0.492
MSTRG.45240	antisense	1.009	1.474	1.411	0.841
MSTRG.45322	antisense	0.057	1.802	0.658	1.038
MSTRG.4557	antisense	0	0	0.35	0
MSTRG.45689	antisense	0.333	0	3.152	1.071
MSTRG.46070	antisense	0.081	0	0.371	0.901
MSTRG.46260	antisense	0.179	0	0.191	0.542
MSTRG.46310	antisense	14.999	22.403	11.472	11.216
MSTRG.46407	antisense	0.285	0	0.053	0
MSTRG.46718	antisense	0	0.045	0	0
MSTRG.47006	antisense	1.627	1.465	0.743	0.299
MSTRG.47122	antisense	0	0	1.518	2.808
MSTRG.47831	antisense	0.098	0.082	0.233	0.267
MSTRG.48227	antisense	1.09	0	1.815	2.863
MSTRG.48819	antisense	0.83	0.919	0.934	1.268
MSTRG.49289	antisense	0.708	0.373	0.605	1.13
MSTRG.49307	antisense	2.391	2.63	4.086	4.59
MSTRG.4978	antisense	0.179	0	0.679	0.377
MSTRG.49842	antisense	0.317	3.23	0.053	0.257
MSTRG.50545	antisense	0.138	0	0.021	0.074
MSTRG.50823	antisense	0	0	0	0.147
MSTRG.51086	antisense	0	0	1.157	0.363
MSTRG.51395	antisense	1.993	0	0	0.184
MSTRG.51463	antisense	1.83	0	4.234	5.638
MSTRG.51691	antisense	0.073	0	0	0
MSTRG.51803	antisense	0.464	3.421	0.318	0.942
MSTRG.52160	antisense	3.799	9.445	5.21	5.119
MSTRG.52223	antisense	16.813	8.463	7.036	9.002
MSTRG.52250	antisense	0	0	0.17	0
MSTRG.52349	antisense	3.254	0	0.891	0.482
MSTRG.52350	antisense	0	0	0.064	0.055
MSTRG.52706	antisense	0	0	2.059	3.874
MSTRG.52709	antisense	0	0	0.393	0.607
MSTRG.53624	antisense	0.7	0	0.042	0.069
MSTRG.53626	antisense	0.065	1.092	0	0.046
MSTRG.54025	antisense	1.423	1.301	1.624	1.3
MSTRG.54339	antisense	1.147	2.375	1.825	1.709
MSTRG.54421	antisense	0	0.737	0.021	0.248
MSTRG.56757	antisense	0	0	0	0.211
MSTRG.57643	antisense	1.358	0	2.027	3.409
MSTRG.57714	antisense	0	0	0.467	0.023
MSTRG.5773	antisense	0	0	1.072	0.657
MSTRG.58532	antisense	3.01	1.911	4.128	5.321
MSTRG.58588	antisense	0.797	0.983	0.849	1.043
MSTRG.58883	antisense	1.757	1.256	1.496	1.783
MSTRG.58899	antisense	0.423	0	0.085	0
MSTRG.58902	antisense	0.106	0	0.053	0.175
MSTRG.58983	antisense	1.781	1.993	1.189	1.392
MSTRG.59208	antisense	0.594	0.628	0.647	0.657
MSTRG.59331	antisense	0	0	0.562	0.041
MSTRG.59473	antisense	0.399	0.61	0.276	0.253
MSTRG.60088	antisense	0.342	0.136	0.7	0.717
MSTRG.60092	antisense	0	0.673	0.255	0.276
MSTRG.60152	antisense	0.106	0	0.393	0.083
MSTRG.60154	antisense	0.35	0.091	1.793	2.959
MSTRG.60228	antisense	0.537	0	0.361	0.51
MSTRG.60270	antisense	1.684	1.774	1.199	2.798
MSTRG.60271	antisense	5.108	0.591	1.549	2.592
MSTRG.60439	antisense	0.952	0.573	0.881	0.496
MSTRG.60586	antisense	0.862	1.875	0.891	0.924
MSTRG.60861	antisense	0	0	0.127	0
MSTRG.60909	antisense	2.814	3.276	2.929	3.065
MSTRG.60910	antisense	0	0	0.149	0.202
MSTRG.60925	antisense	0	0	0.17	0.349
MSTRG.60941	antisense	1.903	0.155	0.435	0.974
MSTRG.61013	antisense	3.107	6.097	2.494	4.986
MSTRG.61389	antisense	2.522	0.127	2.154	2.293
MSTRG.61391	antisense	0.26	0.291	0.361	0.901
MSTRG.61528	antisense	0.634	0	0.159	0.331
MSTRG.61564	antisense	0.545	2.111	4.34	4.618
MSTRG.61639	antisense	1.936	0.71	0.669	0.652
MSTRG.61671	antisense	0.952	0	2.961	3.019
MSTRG.61733	antisense	1.009	3.239	2.292	2.408
MSTRG.6179	antisense	0.488	1.128	0.478	0.551
MSTRG.61833	antisense	0.089	0	0.424	0.018
MSTRG.61999	antisense	0	0	0.053	0.083
MSTRG.62031	antisense	0	0	0.87	0.979
MSTRG.6243	antisense	0	0	0.17	0.754
MSTRG.62446	antisense	0.634	0	0.233	0.207
MSTRG.6252	antisense	0	0	0.064	0.018
MSTRG.62924	antisense	0.39	0	5.083	0.326
MSTRG.63044	antisense	6.019	13.131	3.735	7.913
MSTRG.6314	antisense	49.854	29.819	25.532	41.584
MSTRG.63157	antisense	4.238	4.632	5.794	6.791
MSTRG.63358	antisense	0	0	0.159	0.092
MSTRG.6346	antisense	0.211	0	0.393	0.294
MSTRG.63915	antisense	2.375	2.038	0.658	0.708
MSTRG.63919	antisense	0	1.638	0.096	0
MSTRG.64030	antisense	0.748	0	0.753	0.905
MSTRG.64094	antisense	0	0	0	0.023
MSTRG.64251	antisense	1.977	4.641	3.406	2.55
MSTRG.64268	antisense	2.326	2.166	2.207	2.601
MSTRG.64282	antisense	18.928	10.037	11.97	11.589
MSTRG.64914	antisense	0.309	0	1.093	1.709
MSTRG.65148	antisense	0.081	0	0.149	0.092
MSTRG.65385	antisense	0.049	1.884	0.223	0.262
MSTRG.65469	antisense	0.016	0	0	0.018
MSTRG.65531	antisense	0.935	3.549	0.764	0.786
MSTRG.65554	antisense	0.317	0.027	0.149	0.414
MSTRG.65742	antisense	0	0	1.645	0.129
MSTRG.66347	antisense	2.229	3.713	0.966	1.236
MSTRG.66746	antisense	0	0	0.223	0.308
MSTRG.66934	antisense	5.246	4.668	4.436	4.894
MSTRG.66943	antisense	0.187	0.491	0.308	0.267
MSTRG.66955	antisense	2.18	11.939	5.094	4.728
MSTRG.67025	antisense	0.171	0.482	0.191	0.372
MSTRG.67048	antisense	0.228	0	0.233	0.074
MSTRG.67236	antisense	0	0	0.117	0.119
MSTRG.6748	antisense	0.268	0.346	0.371	0.597
MSTRG.67511	antisense	0.895	0	0.191	1.107
MSTRG.67859	antisense	0.195	1.074	0.891	1.337
MSTRG.67860	antisense	0.464	1.356	0.944	2.449
MSTRG.68035	antisense	0.138	0.382	0.584	0.354
MSTRG.68083	antisense	0	1.046	0	0.028
MSTRG.68489	antisense	0.049	5.505	2.802	1.084
MSTRG.68522	antisense	2.863	3.03	4.022	5.757
MSTRG.68816	antisense	0	0.61	0.18	0.092
MSTRG.69387	antisense	0.081	0	0	0
MSTRG.69460	antisense	20.075	18.354	15.823	12.305
MSTRG.70607	antisense	0	0.837	0.35	0.207
MSTRG.70625	antisense	0	0	0	0.009
MSTRG.71091	antisense	0.366	0	0.265	0.253
MSTRG.71263	antisense	0	0	0.191	0.051
MSTRG.71949	antisense	0.13	0	4.34	0.349
MSTRG.71950	antisense	0.008	0.009	0.064	0.106
MSTRG.72284	antisense	0.586	0	0.053	0.147
MSTRG.7241	antisense	2.001	0.428	1.284	1.337
MSTRG.72483	antisense	1.057	0	0.032	0.074
MSTRG.72504	antisense	0.602	2.22	0.573	0.845
MSTRG.72598	antisense	0.342	0	0.584	0.855
MSTRG.731	antisense	0	0	0.361	0.294
MSTRG.73345	antisense	0.537	0.601	0.382	0.804
MSTRG.74200	antisense	1.879	0	1.019	1.011
MSTRG.74809	antisense	0	0	0.011	0.005
MSTRG.75005	antisense	0	5.496	0.318	0.078
MSTRG.75013	antisense	5.377	0.646	0.7	1.622
MSTRG.75425	antisense	0.13	0.246	0.159	0.234
MSTRG.75487	antisense	1.903	1.811	0.329	1.034
MSTRG.75756	antisense	0	0.965	0	0
MSTRG.76486	antisense	0.675	0	0	0.051
MSTRG.77059	antisense	0	0	0.276	0.349
MSTRG.77085	antisense	0	0	0.042	0.101
MSTRG.77131	antisense	1.806	1.019	3.173	2.008
MSTRG.77148	antisense	0.781	0.164	0.637	0.363
MSTRG.77205	antisense	0	0	0.117	0
MSTRG.77206	antisense	0	0.045	0.18	0.202
MSTRG.77628	antisense	3.937	1.547	3.958	6.791
MSTRG.77653	antisense	0.756	0	0.775	1.268
MSTRG.77788	antisense	0.325	0	0	0
MSTRG.78419	antisense	1.318	2.12	0.881	1.93
MSTRG.78691	antisense	0.586	0.892	1.019	1.268
MSTRG.78741	antisense	1.855	7.862	5.03	8.193
MSTRG.79348	antisense	0	0	0.562	0.184
MSTRG.79383	antisense	0.732	0	0.966	0.611
MSTRG.79479	antisense	0	0	0.456	0.841
MSTRG.79625	antisense	0.081	0	0.86	0.119
MSTRG.79639	antisense	0.179	0	0.424	0.441
MSTRG.79672	antisense	7.776	10.337	14.974	21.918
MSTRG.79678	antisense	0.447	0.237	0.085	0.115
MSTRG.79811	antisense	0.911	0.764	0.828	0.726
MSTRG.80123	antisense	0.049	2.311	4.054	1.682
MSTRG.8024	antisense	0	3.476	0.552	0.032
MSTRG.80281	antisense	0	0	0	0.083
MSTRG.80350	antisense	0.667	1.447	1.411	1.53
MSTRG.80567	antisense	0.716	0	0.255	0.331
MSTRG.81619	antisense	0.578	0.655	0.838	0.924
MSTRG.81752	antisense	3.001	2.994	3.735	1.438
MSTRG.81856	antisense	0.179	0.337	0.233	0.193
MSTRG.81889	antisense	0.033	1.137	0.085	0.06
MSTRG.82184	antisense	0.976	0	4.043	0.708
MSTRG.82328	antisense	0.7	8.581	0.403	4.926
MSTRG.82698	antisense	0.057	0.382	0.202	0.11
MSTRG.82735	antisense	0.155	0.337	0.032	0.17
MSTRG.82737	antisense	1.009	2.229	1.327	1.25
MSTRG.82753	antisense	2.066	5.687	2.77	2.27
MSTRG.82865	antisense	0.008	0.027	0.064	0.014
MSTRG.83501	antisense	0	1.529	0.244	0.455
MSTRG.83551	antisense	0.407	0	0.817	1.388
MSTRG.83646	antisense	0.024	0.828	0.255	0.161
MSTRG.83647	antisense	0	1.938	0.849	0.184
MSTRG.83737	antisense	0.106	0	0.202	0.57
MSTRG.84058	antisense	0	0	0.393	0.092
MSTRG.84070	antisense	0.122	1.019	0.382	0.469
MSTRG.84159	antisense	2.343	0	0.87	0.905
MSTRG.84182	antisense	1.009	1.119	1.454	1.411
MSTRG.84216	antisense	0.098	4.086	0.096	0.469
MSTRG.84918	antisense	0.26	0.027	0.382	0.979
MSTRG.84921	antisense	0	3.867	0.796	2.1
MSTRG.85046	antisense	0.586	0	0.18	0.303
MSTRG.8535	antisense	0.659	1.884	0.944	0.818
MSTRG.85404	antisense	0.903	0.728	0.891	1.889
MSTRG.85654	antisense	1.106	0	1.263	0.896
MSTRG.85782	antisense	0	0	3.3	2.339
MSTRG.86033	antisense	0.049	1.838	3.088	0.62
MSTRG.8604	antisense	0.211	0	0.138	0.942
MSTRG.86877	antisense	0	0	0.053	0.028
MSTRG.86878	antisense	1.131	2.912	2.006	2.072
MSTRG.86991	antisense	0	0	0.032	0
MSTRG.87010	antisense	7.345	1.784	1.666	2.711
MSTRG.87220	antisense	3.278	0.837	1.549	6.392
MSTRG.87319	antisense	0	0	0.393	0.179
MSTRG.88089	antisense	0	1.956	0	0
MSTRG.88206	antisense	0.626	0	0.605	0.358
MSTRG.8822	antisense	0	0	0.074	0.106
MSTRG.88260	antisense	4.189	2.966	5.667	4.783
MSTRG.88301	antisense	1.586	0	0	0
MSTRG.8856	antisense	2.278	0.837	0.807	1.452
MSTRG.88578	antisense	0	0	0	0.648
MSTRG.88669	antisense	0	0.473	0.478	0.625
MSTRG.88862	antisense	0.244	0	0.117	0.487
MSTRG.88984	antisense	0.309	0	0	0
MSTRG.89321	antisense	0.561	2.411	1.613	1.489
MSTRG.89355	antisense	0.602	0	0.276	0.326
MSTRG.89356	antisense	6.45	2.866	3.502	3.152
MSTRG.8979	antisense	0	0	0.159	0.096
MSTRG.89823	antisense	0.472	0	0.287	0.827
MSTRG.89948	antisense	0.195	0.127	0.552	0.744
MSTRG.90574	antisense	0.228	1.738	0.117	0.377
MSTRG.90686	antisense	0.293	2.839	0.446	0.464
MSTRG.90773	antisense	1.155	1.465	0.711	2.325
MSTRG.90842	antisense	0	0	0.032	0.032
MSTRG.91040	antisense	0.211	0.673	5.762	0.372
MSTRG.91535	antisense	0.089	0.1	0.265	0.551
MSTRG.91571	antisense	0.211	0.164	0.329	0.262
MSTRG.91631	antisense	0.333	1.893	0.244	0.386
MSTRG.91659	antisense	2.473	3.867	2.388	2.32
MSTRG.91758	antisense	0	0	0.085	0.06
MSTRG.91950	antisense	0	0.109	15.186	0.299
MSTRG.92162	antisense	0	0	0.032	1.558
MSTRG.92386	antisense	0	0	0.085	0.119
MSTRG.92391	antisense	0	1.292	0.371	0.57
MSTRG.92397	antisense	0	0	1.135	3.768
MSTRG.92464	antisense	1.968	2.448	2.388	2.201
MSTRG.92479	antisense	2.058	0	0	0
MSTRG.92579	antisense	0	0	3.067	0.556
MSTRG.92581	antisense	0	0	0.117	1.613
MSTRG.92636	antisense	0.171	0	0.276	0.161
MSTRG.92695	antisense	0	0	0.021	0.083
MSTRG.927	antisense	0	0	0.446	0
MSTRG.93191	antisense	1.098	1.001	2.122	1.084
MSTRG.93293	antisense	0.781	0	0.212	0.698
MSTRG.93561	antisense	2.196	0	1.751	1.231
MSTRG.93755	antisense	0	0	0	0.335
MSTRG.93866	antisense	0	0	0.244	0.078
MSTRG.93867	antisense	0	0	0.414	0.703
MSTRG.93925	antisense	0	0	0.212	0.074
MSTRG.94028	antisense	0	0	0.403	0.221
MSTRG.94915	antisense	0.106	0.009	1.125	1.714
MSTRG.95087	antisense	0	0	0.18	0.028
MSTRG.95217	antisense	0	5.169	0.711	0
MSTRG.95241	antisense	2.066	1.319	1.189	2.215
MSTRG.95246	antisense	0.756	4.477	3.576	3.258
MSTRG.95489	antisense	0	0	1.22	0.363
MSTRG.95490	antisense	0	0	0.138	0.069
MSTRG.95513	antisense	0	0	0.064	0.345
MSTRG.95562	antisense	0	0	0.52	0.441
MSTRG.95602	antisense	0.618	0.946	0.478	1.172
MSTRG.95665	antisense	0	0	0.085	0.253
MSTRG.95690	antisense	0.643	0	0.106	0.832
MSTRG.95704	antisense	0	0	0.042	0.032
MSTRG.95814	antisense	1.139	0	0.891	0.032
MSTRG.9584	antisense	0	0.073	1.273	0.133
MSTRG.95926	antisense	0	0	0.074	1.02
MSTRG.95988	antisense	0.293	1.966	0.743	0.786
MSTRG.96031	antisense	0.358	0	0.467	0.147
MSTRG.96040	antisense	2.855	0	0.446	0.221
MSTRG.96490	antisense	0.545	0.737	0.499	0.781
MSTRG.96557	antisense	0	0	0.287	0.262
MSTRG.96631	antisense	0	6.124	2.356	5.404
MSTRG.96867	antisense	0.691	2.211	0.944	1.277
MSTRG.96917	antisense	0.805	0	6.293	1.792
MSTRG.97018	antisense	0	0	0	0.188
MSTRG.97049	antisense	1.131	2.057	1.051	2.532
MSTRG.97112	antisense	0.952	0.246	1.146	2.252
MSTRG.97117	antisense	0	0	0.807	0.152
MSTRG.97154	antisense	2.001	0	0.096	0
MSTRG.97166	antisense	0.285	1.256	2.589	0.152
MSTRG.97238	antisense	0.236	0	0.191	0.115
MSTRG.97284	antisense	6.052	5.123	9.286	9.411
MSTRG.97285	antisense	0.114	0	0.064	0
MSTRG.97304	antisense	0	0	0.212	0.326
MSTRG.97522	antisense	0	0.737	0.637	0.634
MSTRG.97704	antisense	0	0	0.615	0
MSTRG.98601	antisense	0.651	0.855	1.666	2.21
MSTRG.98604	antisense	1.367	1.001	0.149	0.496
MSTRG.98699	antisense	5.865	12.303	6.346	6.052
MSTRG.98971	antisense	0.13	3.804	0.223	1.19
MSTRG.99029	antisense	0.26	0	0.032	0.294
MSTRG.99132	antisense	0	0.846	0.276	0.947
MSTRG.99164	antisense	1.806	4.805	1.295	0.777
MSTRG.99282	antisense	0.626	0	1.38	0.487
MSTRG.99347	antisense	0.618	0	0	0.101
MSTRG.99512	antisense	0.578	1.119	0.913	0.919
MSTRG.100012	intronic	2.082	3.585	2.823	2.955
MSTRG.100682	intronic	1.594	0	0.488	1.218
MSTRG.101895	intronic	0.748	0.546	0.223	0.409
MSTRG.101989	intronic	0.716	1.329	0.573	0.901
MSTRG.108166	intronic	6.995	0	3.247	4.411
MSTRG.108856	intronic	0.236	0	0.276	0.349
MSTRG.109981	intronic	0	0	0	0.096
MSTRG.110459	intronic	0.187	0	0.35	0.561
MSTRG.110774	intronic	0.456	1.11	1.539	1.778
MSTRG.110888	intronic	0.016	0.328	0.255	0.262
MSTRG.111424	intronic	15.471	29.1	29.915	33.709
MSTRG.111435	intronic	0.333	0.81	0.202	0.133
MSTRG.112804	intronic	0	0	0.096	0.06
MSTRG.112889	intronic	0.423	0	1.369	1.3
MSTRG.113734	intronic	0.057	0	0.329	0.308
MSTRG.114130	intronic	0.895	0.282	0.647	0.818
MSTRG.114796	intronic	0.415	0	1.518	1.02
MSTRG.115111	intronic	0	0.701	1.348	3.492
MSTRG.115253	intronic	0.114	0.619	0.202	0.625
MSTRG.118960	intronic	0	0	0	0.092
MSTRG.119370	intronic	1.895	3.176	2.356	3.023
MSTRG.120348	intronic	1.855	0	0.509	0.129
MSTRG.120838	intronic	1.131	1.31	20.874	2.219
MSTRG.121016	intronic	0.252	0.419	0.807	0.464
MSTRG.122852	intronic	0	0	0.52	0.055
MSTRG.123864	intronic	0.285	2.12	0	0.28
MSTRG.125635	intronic	1.578	0	0.265	0.482
MSTRG.125730	intronic	0	0	0.382	0.239
MSTRG.131829	intronic	0.399	4.532	0.085	0.046
MSTRG.133332	intronic	0	0	1.942	0.322
MSTRG.133333	intronic	0.041	0	1.019	0.17
MSTRG.13347	intronic	0.399	0	0.276	0.561
MSTRG.133622	intronic	0.569	1.829	0.626	1.199
MSTRG.133678	intronic	0	0	0.159	0.983
MSTRG.134240	intronic	0.602	0	0.478	0.864
MSTRG.135072	intronic	0	0	0.042	0.124
MSTRG.135122	intronic	0.309	0	0.329	0.533
MSTRG.135796	intronic	0.74	0	1.942	3.152
MSTRG.137110	intronic	1.245	1.429	1.454	1.838
MSTRG.137759	intronic	0	0	0.106	0.478
MSTRG.139012	intronic	1.586	2.821	2.536	2.734
MSTRG.142188	intronic	0.586	1.31	0.753	0.625
MSTRG.142900	intronic	0.073	1.365	0.743	0.018
MSTRG.142902	intronic	0.488	0	0.329	0.703
MSTRG.144572	intronic	0	0	1.231	0.616
MSTRG.145597	intronic	0	0	1.358	1.434
MSTRG.146547	intronic	0.602	1.046	1.358	1.121
MSTRG.146602	intronic	1.236	0	1.571	0.717
MSTRG.146622	intronic	2.196	3.576	1.443	4.82
MSTRG.146663	intronic	0.537	3.694	1.539	3.727
MSTRG.147042	intronic	0	0	0.69	0.979
MSTRG.147257	intronic	0.781	0	0.52	0.763
MSTRG.147258	intronic	1.464	1.72	2.833	4.149
MSTRG.147271	intronic	0.399	2.284	1.772	2.192
MSTRG.148224	intronic	1.724	4.304	0.775	0.565
MSTRG.148309	intronic	0.309	0	0.032	0.115
MSTRG.150283	intronic	0.618	0	0.393	0.652
MSTRG.150746	intronic	0	0.055	0.106	0.423
MSTRG.150875	intronic	0.813	1.756	1.571	2.532
MSTRG.151253	intronic	2.294	0	1.114	1.103
MSTRG.151586	intronic	0.732	0.664	7.312	2.5
MSTRG.151703	intronic	0.415	0	1.125	1.186
MSTRG.152006	intronic	0	0	1.051	0.845
MSTRG.152483	intronic	10.713	25.442	11.907	17.374
MSTRG.153333	intronic	1.245	0	0.074	0.211
MSTRG.153558	intronic	0.374	0	0.096	0.028
MSTRG.154176	intronic	0	0	7.917	2.155
MSTRG.156182	intronic	4.661	6.433	2.494	12.177
MSTRG.157322	intronic	1.619	1.556	2.207	2.647
MSTRG.157334	intronic	0	0	0.308	0.221
MSTRG.159145	intronic	0.285	0	0.096	0.23
MSTRG.160248	intronic	2.871	2.602	2.886	4.393
MSTRG.160258	intronic	0.773	0	1.486	1.48
MSTRG.160309	intronic	1.025	0	0.775	1.323
MSTRG.161323	intronic	0.488	0	0.626	0.087
MSTRG.162883	intronic	3.278	0	0.531	2.173
MSTRG.163831	intronic	0	4.186	0.414	0
MSTRG.16438	intronic	1	0.728	3.778	3.97
MSTRG.164762	intronic	0.187	0	0.467	0.942
MSTRG.166464	intronic	0	0	0.509	0.455
MSTRG.166641	intronic	0.081	0.564	0.085	0.496
MSTRG.167016	intronic	1.179	14.769	7.174	19.308
MSTRG.167091	intronic	0.887	0	1.889	4.255
MSTRG.167477	intronic	0.887	4.304	1.602	3.065
MSTRG.16943	intronic	1.204	3.085	14.634	2.835
MSTRG.170784	intronic	0.813	1.629	0.265	0.639
MSTRG.171521	intronic	0	0	2.791	0.505
MSTRG.173688	intronic	0	0	0.202	1.002
MSTRG.174258	intronic	0.171	0.901	0.191	0.611
MSTRG.174337	intronic	1.659	0.073	0.923	1.103
MSTRG.176326	intronic	0.309	0	0.042	0.184
MSTRG.177094	intronic	0.228	0	0	0.037
MSTRG.177099	intronic	0.228	0	0	0.037
MSTRG.178774	intronic	0	0	0.318	0.524
MSTRG.179545	intronic	0	0	1.783	1.939
MSTRG.181589	intronic	0	2.621	0.276	0.731
MSTRG.182676	intronic	0.789	1.265	1.284	1.7
MSTRG.182704	intronic	1.586	0	0.34	0.519
MSTRG.184659	intronic	0	0	0.329	0
MSTRG.187297	intronic	0.228	0.082	0.223	0.271
MSTRG.187332	intronic	0.098	0	0.011	0.101
MSTRG.18837	intronic	0.504	1.174	0.796	1.02
MSTRG.188918	intronic	1.367	3.33	3.534	3.341
MSTRG.189006	intronic	0	0	0.446	0.859
MSTRG.189243	intronic	0.716	0	1.337	2.955
MSTRG.189680	intronic	2.009	4.004	3.449	4.021
MSTRG.190119	intronic	2.261	3.603	1.56	4.632
MSTRG.191894	intronic	0.106	0	0	0.119
MSTRG.192810	intronic	1.163	2.038	0.308	0.276
MSTRG.193329	intronic	1.968	0	2.886	2.876
MSTRG.195367	intronic	0	0.628	0.424	0.165
MSTRG.196097	intronic	2.212	1.465	1.422	2.955
MSTRG.197217	intronic	0	0	0.732	0.505
MSTRG.198098	intronic	0.114	0.291	0.297	0.694
MSTRG.199193	intronic	0.016	4.75	0.127	0.023
MSTRG.20218	intronic	7.426	8.153	6.028	8.726
MSTRG.206819	intronic	0	0	1.157	1.48
MSTRG.207723	intronic	0	0	0.149	0.248
MSTRG.208437	intronic	3.368	0	2.356	2.624
MSTRG.209147	intronic	0.716	0	0	0.092
MSTRG.210182	intronic	0	0	0	0.119
MSTRG.210357	intronic	0	1.356	0.488	1.186
MSTRG.210359	intronic	0.122	0	0.127	0.152
MSTRG.210720	intronic	0.83	0	0.573	0.556
MSTRG.212351	intronic	0.61	0.218	1.263	1.434
MSTRG.21430	intronic	1.269	2.029	2.77	2.886
MSTRG.214802	intronic	0.317	0	0.042	0.023
MSTRG.216964	intronic	1.855	0	0.637	1.53
MSTRG.217189	intronic	0	0	0	0.312
MSTRG.21740	intronic	0.081	0	0.106	0.142
MSTRG.217589	intronic	0.651	0.318	0.371	0.524
MSTRG.218622	intronic	0.155	0	0.478	1.199
MSTRG.218636	intronic	0	2.794	0.053	0.303
MSTRG.218766	intronic	0	0.855	1.974	0.142
MSTRG.22406	intronic	0.098	0.018	0.18	0.322
MSTRG.22635	intronic	0	0.118	5.677	0.294
MSTRG.23123	intronic	2.953	8.626	16.873	13.054
MSTRG.25233	intronic	0	0	0.891	1.002
MSTRG.2577	intronic	0.13	0	0.233	0.248
MSTRG.2578	intronic	0.081	0.71	0.34	0.662
MSTRG.2579	intronic	0	0	0.552	2.252
MSTRG.25862	intronic	11.591	41.585	58.217	56.757
MSTRG.26249	intronic	0.098	0	0.149	0.193
MSTRG.26250	intronic	0	0	0.106	0.345
MSTRG.26729	intronic	1.871	2.584	0.891	1.084
MSTRG.30327	intronic	3.587	11.584	5.317	6.888
MSTRG.31645	intronic	0	0	0.042	0.096
MSTRG.31927	intronic	27.176	10.128	8.882	10.637
MSTRG.3289	intronic	2.977	0	0.244	1.002
MSTRG.33460	intronic	0.96	0.965	0.053	0.06
MSTRG.34649	intronic	0.504	0	0.329	0.046
MSTRG.34813	intronic	0	0	0.435	0.257
MSTRG.35053	intronic	0.236	0	0.361	0.179
MSTRG.35215	intronic	0.643	1.947	2.292	2.734
MSTRG.35374	intronic	0.7	0.928	0.446	0.947
MSTRG.35796	intronic	1.456	0	0.584	0.657
MSTRG.35826	intronic	1	1.702	1.74	1.994
MSTRG.35977	intronic	1.432	2.484	1.963	1.99
MSTRG.36083	intronic	0	0	0.308	0.505
MSTRG.36299	intronic	0.301	0.091	0.52	0.717
MSTRG.37697	intronic	0	0	0.308	3.207
MSTRG.37907	intronic	0	0	0	0.478
MSTRG.38813	intronic	0	0	0.382	0.777
MSTRG.38985	intronic	4.368	3.485	2.918	5.698
MSTRG.39214	intronic	0.521	1.401	2.006	1.852
MSTRG.3951	intronic	0.138	0.619	0.053	0.276
MSTRG.41276	intronic	0.708	1.292	1.252	1.378
MSTRG.41731	intronic	0.317	0	0.393	0.446
MSTRG.42282	intronic	0.553	0	0.35	1.737
MSTRG.44636	intronic	0.171	0.582	0.467	0.51
MSTRG.47154	intronic	2.896	7.28	2.833	4.264
MSTRG.48378	intronic	0.48	0.955	0.594	0.593
MSTRG.49775	intronic	0	0	0.393	0.694
MSTRG.51607	intronic	0	0	0	0.014
MSTRG.51802	intronic	1.936	0	0.17	0.469
MSTRG.52268	intronic	6.662	26.917	16.767	23.54
MSTRG.52298	intronic	0	2.293	0.117	0.188
MSTRG.52535	intronic	0.521	0	0.085	0.441
MSTRG.52745	intronic	0.594	0	0	0.165
MSTRG.5275	intronic	0.065	0.009	0.149	0.372
MSTRG.53513	intronic	0.228	0	0	0.074
MSTRG.54784	intronic	0.089	0	0	1.117
MSTRG.58632	intronic	0.903	0.892	4.34	0.671
MSTRG.58832	intronic	0.878	0.664	0.414	0.487
MSTRG.58987	intronic	0	0	0.085	0
MSTRG.58988	intronic	0	0	0.17	0.119
MSTRG.60588	intronic	0.008	0.491	0.34	0.459
MSTRG.611	intronic	0	0	0.212	0.161
MSTRG.613	intronic	0	0	0.584	0.96
MSTRG.6142	intronic	0	0.127	0.053	0.156
MSTRG.62023	intronic	0.561	0	2.197	5.84
MSTRG.62554	intronic	2.05	2.339	3.523	3.639
MSTRG.62906	intronic	0.106	0	0.202	0.501
MSTRG.6337	intronic	0.618	0.619	0.753	1.443
MSTRG.6382	intronic	1.822	0.801	11.323	5.44
MSTRG.65578	intronic	0	0	0.202	0.083
MSTRG.66371	intronic	0	0	0.032	0
MSTRG.6750	intronic	0	0	0	0.997
MSTRG.68034	intronic	2.009	2.757	7.524	4.94
MSTRG.68127	intronic	0	0	0.149	0.124
MSTRG.68827	intronic	0	5.214	3.757	0.271
MSTRG.69191	intronic	0	0	0.106	0.335
MSTRG.69386	intronic	0.155	0.628	0.52	0.79
MSTRG.71416	intronic	0	0	0.202	0.515
MSTRG.71875	intronic	0	0	0.053	0.152
MSTRG.72429	intronic	0	0	0	0.354
MSTRG.73646	intronic	0.643	1.292	1.029	1.015
MSTRG.74319	intronic	0.944	0	0.679	0.165
MSTRG.74780	intronic	0	7.716	1.369	2.642
MSTRG.75004	intronic	1.423	0	0	0.028
MSTRG.77301	intronic	0.488	0	0.276	0.267
MSTRG.78345	intronic	0.952	0.182	0.955	0.754
MSTRG.78453	intronic	0.382	0.692	0.276	0.721
MSTRG.79345	intronic	0.691	0	0	0.303
MSTRG.80566	intronic	6.393	10.128	11.047	4.186
MSTRG.82331	intronic	0.48	0	0.265	0.372
MSTRG.83105	intronic	2.058	5.296	1.655	2.546
MSTRG.8456	intronic	0.016	4.75	0.127	0.023
MSTRG.8821	intronic	0.195	0.955	0.265	0.147
MSTRG.89028	intronic	6.369	10.492	4.648	6.86
MSTRG.91763	intronic	0	0	0.159	0.675
MSTRG.92384	intronic	0	0	0.085	0.478
MSTRG.92465	intronic	2.546	6.661	2.749	3.171
MSTRG.92809	intronic	1.57	1.292	2.494	2.114
MSTRG.93756	intronic	0	0.482	0.669	0.731
MSTRG.94124	intronic	0.098	0	0.265	0.349
MSTRG.95332	intronic	0	0	0.202	0.041
MSTRG.95822	intronic	0.529	0.883	1.263	1.438
MSTRG.98281	intronic	1.667	1.183	1.401	1.719
ENSSSCG00000025648	lincRNA	0	0	0.074	0
ENSSSCG00000030722	lincRNA	0	1.056	0.074	0.032
ENSSSCG00000030729	lincRNA	1.497	1.702	1.316	0.974
ENSSSCG00000030749	lincRNA	0	1.374	0.042	0.051
ENSSSCG00000030765	lincRNA	2.741	63.451	10.039	45.187
ENSSSCG00000030780	lincRNA	0	0	0.096	0.221
ENSSSCG00000030804	lincRNA	10.493	21.075	14.018	17.838
ENSSSCG00000030815	lincRNA	0	0	0.149	0
ENSSSCG00000030816	lincRNA	0	0	0.042	0.055
ENSSSCG00000030824	lincRNA	0.065	0	0.032	0.129
ENSSSCG00000030826	lincRNA	0	0	0.042	0.032
ENSSSCG00000030836	lincRNA	2.928	35.033	30.594	54.813
ENSSSCG00000030847	lincRNA	9.549	9.982	8.532	11.731
ENSSSCG00000030892	lincRNA	3.368	1.902	1.22	3.046
ENSSSCG00000030916	lincRNA	1.391	0.591	0.732	0.983
ENSSSCG00000030931	lincRNA	4.205	5.287	2.526	2.284
ENSSSCG00000030934	lincRNA	1.545	0	0.106	0.119
ENSSSCG00000030935	lincRNA	8.28	21.966	10.612	11.092
ENSSSCG00000030945	lincRNA	0.382	0.737	0.891	1.447
ENSSSCG00000030949	lincRNA	0	0	0	0.009
ENSSSCG00000030972	lincRNA	0	0	0.085	0.028
ENSSSCG00000030973	lincRNA	0.61	0	0.913	2.008
ENSSSCG00000030992	lincRNA	1.545	63.133	30.796	66.875
ENSSSCG00000030994	lincRNA	0	0	0.223	0.556
ENSSSCG00000031004	lincRNA	0.667	0.591	0.393	0.473
ENSSSCG00000031009	lincRNA	0.691	2.093	0.297	0.708
ENSSSCG00000031014	lincRNA	10.558	25.725	19.027	17.171
ENSSSCG00000031015	lincRNA	0	0.81	0	0.032
ENSSSCG00000031017	lincRNA	0.439	0	0.584	1.038
ENSSSCG00000031025	lincRNA	4.417	6.561	3.396	3.846
ENSSSCG00000031028	lincRNA	4.026	2.703	1.507	2.5
ENSSSCG00000031048	lincRNA	0.049	0	0.074	0.175
ENSSSCG00000031051	lincRNA	0	0	0.021	0
MSTRG.1	lincRNA	2.383	7.116	2.961	1.268
MSTRG.100126	lincRNA	1.09	2.721	2.313	3.267
MSTRG.100127	lincRNA	0.041	0	0.042	0.046
MSTRG.100280	lincRNA	1.367	2.457	1.443	0.8
MSTRG.100319	lincRNA	0	1.656	0.318	0
MSTRG.100406	lincRNA	0	0	2.197	0.106
MSTRG.100422	lincRNA	10.55	19.801	11.419	13.39
MSTRG.100538	lincRNA	0	0	0.753	0.551
MSTRG.100574	lincRNA	0	0	0.456	1.567
MSTRG.100579	lincRNA	0.521	0	0.042	0.028
MSTRG.100653	lincRNA	0.431	0.546	0.732	0.947
MSTRG.100695	lincRNA	0.822	0.928	0.127	0.129
MSTRG.10104	lincRNA	0.846	0	0.233	0.754
MSTRG.101187	lincRNA	0.553	1.283	1.104	1.135
MSTRG.101199	lincRNA	1.586	4.24	3.969	3.704
MSTRG.101208	lincRNA	0	0	0.318	0.198
MSTRG.101278	lincRNA	0.96	2.32	1.772	2.454
MSTRG.101581	lincRNA	1.554	0.237	2.749	0.947
MSTRG.101590	lincRNA	3.734	1.492	2.027	4.664
MSTRG.101591	lincRNA	0	0.937	0.159	0.845
MSTRG.101605	lincRNA	0.374	1.429	0.838	1.213
MSTRG.10162	lincRNA	0.236	0.901	4.924	16.753
MSTRG.101725	lincRNA	1.139	0	0.34	0.602
MSTRG.101789	lincRNA	0.96	1.893	1.815	2.275
MSTRG.10194	lincRNA	0.293	2.63	1.889	6.511
MSTRG.102093	lincRNA	0	0	0	1.696
MSTRG.102133	lincRNA	0	0	0.361	0.418
MSTRG.1023	lincRNA	0.342	0	0.053	0
MSTRG.102301	lincRNA	1.912	2.657	5.943	5.45
MSTRG.102415	lincRNA	90.443	30.566	63.99	31.774
MSTRG.102525	lincRNA	2.709	8.89	2.175	2.031
MSTRG.102585	lincRNA	0.553	0.055	0.085	0.119
MSTRG.102617	lincRNA	0	0	0.202	0.188
MSTRG.102658	lincRNA	2.928	17.48	2.77	2.628
MSTRG.102674	lincRNA	1.545	4.286	3.215	4.26
MSTRG.102706	lincRNA	3.831	0.073	1.815	2.376
MSTRG.103017	lincRNA	0.724	9.09	1.061	2.536
MSTRG.10305	lincRNA	4.905	2.43	5.943	4.742
MSTRG.103052	lincRNA	0	0.391	0.202	0.441
MSTRG.103175	lincRNA	0.578	0.318	1.231	1.153
MSTRG.103272	lincRNA	0	1.465	0.828	0.248
MSTRG.103518	lincRNA	0	0	0.032	0
MSTRG.103615	lincRNA	1.383	4.122	0.329	2.78
MSTRG.103665	lincRNA	0.87	1.329	1.73	1.866
MSTRG.103666	lincRNA	1.521	2.293	2.95	4.898
MSTRG.103676	lincRNA	0	0	0.191	0.257
MSTRG.103704	lincRNA	0	1.101	0.127	0.041
MSTRG.103742	lincRNA	0	0	0.106	0
MSTRG.103755	lincRNA	0.374	0.51	0.138	0.239
MSTRG.103809	lincRNA	0.594	0.027	0.223	0.294
MSTRG.103841	lincRNA	0.293	10.346	0.987	1.268
MSTRG.103851	lincRNA	0	0	0.032	0
MSTRG.103890	lincRNA	0	0	1.857	0.078
MSTRG.103985	lincRNA	0	2.22	0.042	0
MSTRG.104021	lincRNA	0.675	3.267	1.348	1.627
MSTRG.104063	lincRNA	1.651	0	0.318	0.156
MSTRG.104124	lincRNA	0.935	0.937	0.626	0.418
MSTRG.104160	lincRNA	0.146	0.409	0.647	1.098
MSTRG.104187	lincRNA	0.228	0.237	0.467	0.772
MSTRG.104258	lincRNA	0	0	0.594	0.234
MSTRG.104313	lincRNA	0.065	2.43	0.424	0.115
MSTRG.104314	lincRNA	0.643	1.046	0.785	0.85
MSTRG.104322	lincRNA	0.081	0	0.159	0.064
MSTRG.104337	lincRNA	0.236	0	0.255	0.179
MSTRG.104432	lincRNA	0	0	0.329	0
MSTRG.104675	lincRNA	0.155	0.045	0.626	0.937
MSTRG.104773	lincRNA	0	0	0.053	0
MSTRG.104780	lincRNA	0	0	0.085	0
MSTRG.104854	lincRNA	0	0	0	0.037
MSTRG.104874	lincRNA	0.561	1.956	0.509	0.303
MSTRG.104943	lincRNA	0.464	0.027	1.549	2.422
MSTRG.104958	lincRNA	0.252	0.173	0.212	0.207
MSTRG.105100	lincRNA	0	0	0	0.165
MSTRG.105310	lincRNA	0.374	0	0	0.028
MSTRG.105346	lincRNA	0.456	0	0.064	0.046
MSTRG.105367	lincRNA	2.644	2.748	4.977	3.625
MSTRG.105412	lincRNA	0	0	0.233	0.156
MSTRG.105548	lincRNA	3.286	6.233	0.764	0.744
MSTRG.105665	lincRNA	0.277	6.37	0.202	0.23
MSTRG.105743	lincRNA	7.15	2.166	8.086	6.24
MSTRG.105744	lincRNA	0	0	2.685	0.239
MSTRG.105841	lincRNA	0.537	0	0.053	0.473
MSTRG.106051	lincRNA	2.855	0	0.159	0.473
MSTRG.106099	lincRNA	3.652	0	0.085	1.002
MSTRG.106164	lincRNA	0.407	0	0	0
MSTRG.106171	lincRNA	0.521	0	0.138	0.101
MSTRG.10619	lincRNA	1.147	0	0.159	0.207
MSTRG.106251	lincRNA	0	1.174	0.127	0
MSTRG.106326	lincRNA	0.342	0	0.096	0
MSTRG.106331	lincRNA	0.333	0.591	0.117	0.06
MSTRG.106723	lincRNA	0	0	0.106	0.165
MSTRG.10673	lincRNA	0	0	0.287	0.074
MSTRG.10679	lincRNA	0.13	0.382	0.276	0.161
MSTRG.106795	lincRNA	0	0	0.202	0.142
MSTRG.106797	lincRNA	0.756	2.976	4.489	1.847
MSTRG.106814	lincRNA	0.569	1.283	1.369	1.135
MSTRG.106925	lincRNA	1.985	0.391	1.369	2.683
MSTRG.106926	lincRNA	0	0	0.318	0.276
MSTRG.106972	lincRNA	0.667	0	0.085	0.561
MSTRG.106995	lincRNA	0.285	0	0.499	0.395
MSTRG.107084	lincRNA	0	0	0.138	0.515
MSTRG.107085	lincRNA	0	0	0.064	0.083
MSTRG.107108	lincRNA	0	11.22	0.212	0.06
MSTRG.10740	lincRNA	0.171	0.828	0.976	0.689
MSTRG.107456	lincRNA	1.057	4.459	0.127	0.459
MSTRG.107484	lincRNA	0	0	0.053	0
MSTRG.107594	lincRNA	0	0	0.106	0.381
MSTRG.107660	lincRNA	0.813	0	0	0.046
MSTRG.108082	lincRNA	0	0.382	0.191	0.06
MSTRG.108109	lincRNA	0	0	0.042	0
MSTRG.108154	lincRNA	0	1.838	0.117	0.257
MSTRG.108173	lincRNA	0	0	0.021	0.014
MSTRG.108180	lincRNA	0	0.737	0.594	0.648
MSTRG.108244	lincRNA	0	0	0	0.041
MSTRG.10825	lincRNA	0	0.136	0.838	1.475
MSTRG.108262	lincRNA	0.358	0.464	0.711	0.639
MSTRG.10850	lincRNA	0.569	1.902	0.541	0.381
MSTRG.108556	lincRNA	2.099	0	0.138	0
MSTRG.108566	lincRNA	1.602	0.036	0.117	0.253
MSTRG.108567	lincRNA	1.326	0	0.34	0.979
MSTRG.108638	lincRNA	4.083	7.234	18.635	3.947
MSTRG.108639	lincRNA	1.358	1.447	3.905	1.438
MSTRG.10866	lincRNA	0	0.71	0.265	0.041
MSTRG.108777	lincRNA	0.089	0	0.064	0
MSTRG.108858	lincRNA	0.033	0.027	0.446	0.156
MSTRG.108859	lincRNA	2.269	1.574	1.581	1.507
MSTRG.10889	lincRNA	0	0	0.053	0.395
MSTRG.108891	lincRNA	0.024	0.218	0.308	0.473
MSTRG.108938	lincRNA	0	0	0.149	0.34
MSTRG.108979	lincRNA	0	0	0.138	0
MSTRG.1090	lincRNA	0.545	0.146	1.04	0.896
MSTRG.109201	lincRNA	0.285	0.71	1.178	1.346
MSTRG.109247	lincRNA	2.188	6.943	5.635	5.519
MSTRG.109253	lincRNA	0	0	0.637	4.848
MSTRG.10927	lincRNA	0.041	0.928	0.106	0
MSTRG.109332	lincRNA	4.449	4.477	3.788	2.366
MSTRG.109352	lincRNA	0.228	0	0	0.124
MSTRG.109519	lincRNA	0.822	2.539	3.226	5.142
MSTRG.109582	lincRNA	0	0.264	0.021	0.023
MSTRG.109631	lincRNA	0	0	0.053	0.032
MSTRG.109768	lincRNA	0	2.348	1.273	2.256
MSTRG.109882	lincRNA	0.016	0	0	0
MSTRG.109915	lincRNA	2.554	4.095	0.138	0.57
MSTRG.109964	lincRNA	0	0	1.157	0
MSTRG.109988	lincRNA	0	1.884	0	0.074
MSTRG.110001	lincRNA	0.789	0	0.34	0.584
MSTRG.110010	lincRNA	10.485	8.372	156.888	156.201
MSTRG.110027	lincRNA	0.22	1.756	0.584	0.924
MSTRG.110028	lincRNA	0	0	0.414	1.103
MSTRG.110029	lincRNA	0	0	0.127	0
MSTRG.110035	lincRNA	0	0	0.212	0.037
MSTRG.110036	lincRNA	1.285	1.947	1.178	1.516
MSTRG.110042	lincRNA	0.862	2.084	2.345	1.65
MSTRG.110054	lincRNA	0.138	0.237	0.202	0.257
MSTRG.11015	lincRNA	0	0	0.722	0.119
MSTRG.110189	lincRNA	0.13	0	1.995	2.049
MSTRG.110338	lincRNA	1.163	0	0.18	0.152
MSTRG.11036	lincRNA	0	0	0.424	0.202
MSTRG.110371	lincRNA	1.367	3.003	1.687	1.856
MSTRG.110391	lincRNA	10.973	5.942	13.414	8.064
MSTRG.11041	lincRNA	0	0	0	0.023
MSTRG.110415	lincRNA	4.514	0	4.393	3.35
MSTRG.110418	lincRNA	0.952	0.946	0.987	1.447
MSTRG.110424	lincRNA	0.87	0.673	2.027	1.723
MSTRG.110473	lincRNA	0.203	0	0.743	0.878
MSTRG.110474	lincRNA	0	0	0.117	0
MSTRG.110560	lincRNA	1.253	0.892	2.409	2.679
MSTRG.110679	lincRNA	0	3.494	0.276	0
MSTRG.110724	lincRNA	0	0	0.053	0.11
MSTRG.110740	lincRNA	0.252	0.591	1.793	2.573
MSTRG.110751	lincRNA	0.431	0.346	0.711	0.478
MSTRG.110752	lincRNA	0	0	0.032	0
MSTRG.110776	lincRNA	0.114	0.346	0.594	2.642
MSTRG.110777	lincRNA	0.114	0.446	0.446	0.414
MSTRG.110778	lincRNA	0	0	0.096	0.257
MSTRG.11084	lincRNA	0	0.1	0.287	0.074
MSTRG.110845	lincRNA	0	0	0.329	1.668
MSTRG.110854	lincRNA	0	0	0.658	0.565
MSTRG.110892	lincRNA	0	0	0	0.156
MSTRG.110894	lincRNA	0	2.912	0.212	0.211
MSTRG.110953	lincRNA	0.203	0	0.52	1.002
MSTRG.111	lincRNA	0.683	2.885	3.162	2.987
MSTRG.111004	lincRNA	0	2.229	2.844	4.65
MSTRG.111009	lincRNA	0	0	0.042	0.023
MSTRG.111059	lincRNA	4.401	2.102	3.948	5.863
MSTRG.111072	lincRNA	7.866	13.941	7.237	7.205
MSTRG.111103	lincRNA	1.31	0.073	0.509	0.896
MSTRG.111104	lincRNA	0.073	0	0.191	0.519
MSTRG.111128	lincRNA	0	0	0.096	0.156
MSTRG.111142	lincRNA	2.058	3.522	0.435	0.427
MSTRG.111192	lincRNA	2.229	0	1.21	0.092
MSTRG.111210	lincRNA	0	3.221	0.626	0.602
MSTRG.111273	lincRNA	0.366	0	0	0
MSTRG.111305	lincRNA	0.83	5.469	0.934	0.836
MSTRG.11134	lincRNA	2.831	7.271	5.486	4.953
MSTRG.11142	lincRNA	0	0	0.042	0.11
MSTRG.111454	lincRNA	1.407	0.773	1.22	1.42
MSTRG.111507	lincRNA	0	0	0.064	0.363
MSTRG.111620	lincRNA	0.106	0.191	1.082	0.515
MSTRG.111623	lincRNA	0.171	0.328	0.361	0.234
MSTRG.111625	lincRNA	0	0	0.499	0.161
MSTRG.111732	lincRNA	0	0	0.117	0
MSTRG.111743	lincRNA	0	0.146	2.197	2.973
MSTRG.111790	lincRNA	7.833	11.265	9.869	10.458
MSTRG.111942	lincRNA	2.131	0.1	1.486	2.192
MSTRG.111944	lincRNA	3.709	33.869	52.179	8.891
MSTRG.111969	lincRNA	3.408	4.686	5.21	8.859
MSTRG.111970	lincRNA	8.118	13.877	3.693	5.574
MSTRG.112	lincRNA	0	0	0.096	0
MSTRG.112024	lincRNA	0	0	0	0.051
MSTRG.112142	lincRNA	0.594	2.402	1.242	1.273
MSTRG.112425	lincRNA	0	0	0	0.064
MSTRG.112450	lincRNA	6.133	13.859	7.503	10.954
MSTRG.112497	lincRNA	0	2.339	1.762	0.11
MSTRG.112503	lincRNA	0	3.658	1.114	3.212
MSTRG.112553	lincRNA	3.847	3.039	4.277	7.26
MSTRG.112722	lincRNA	0	0	0	0.225
MSTRG.1129	lincRNA	1.757	3.476	1.486	1.576
MSTRG.112901	lincRNA	0.065	0.637	0.276	0.377
MSTRG.112929	lincRNA	2.343	0.51	1.125	0.818
MSTRG.112983	lincRNA	0	0	0.053	0.009
MSTRG.113253	lincRNA	0.024	1.156	0.191	0.551
MSTRG.113304	lincRNA	0.944	0	0	0.06
MSTRG.113308	lincRNA	0	1.811	0	0.083
MSTRG.113420	lincRNA	0	0.027	0.658	0.68
MSTRG.113430	lincRNA	0.073	0.364	0.923	0.887
MSTRG.113672	lincRNA	0.366	0	0	0
MSTRG.113707	lincRNA	0.439	0.391	0.35	0.225
MSTRG.113731	lincRNA	3.481	5.851	6.187	8.363
MSTRG.113777	lincRNA	0.724	3.212	2.547	2.748
MSTRG.113779	lincRNA	3.473	4.723	2.6	4.953
MSTRG.113788	lincRNA	2.416	8.062	5.762	5.431
MSTRG.113789	lincRNA	0.049	0	0.127	0.138
MSTRG.113803	lincRNA	0	0	0.096	0.308
MSTRG.113813	lincRNA	0	0	0.202	1.617
MSTRG.113830	lincRNA	0.301	0.227	2.016	6.116
MSTRG.113831	lincRNA	0	0.328	0.424	0.358
MSTRG.113833	lincRNA	1.212	6.424	1.464	3.552
MSTRG.113870	lincRNA	0.374	0.628	0.042	0.101
MSTRG.113886	lincRNA	0.114	10.592	0.966	2.385
MSTRG.113925	lincRNA	7.695	13.649	10.782	14.69
MSTRG.113939	lincRNA	0.399	0.373	3.184	0.285
MSTRG.114021	lincRNA	0.285	0	0.074	0.202
MSTRG.114069	lincRNA	1.619	1.966	1.793	2.013
MSTRG.114091	lincRNA	1.48	2.238	2.398	3.046
MSTRG.114132	lincRNA	8.053	0.573	0.891	2.798
MSTRG.114311	lincRNA	0.854	2.812	1.178	1.277
MSTRG.114316	lincRNA	0.927	4.714	1.019	2.095
MSTRG.114325	lincRNA	1.123	1.429	1.698	2.353
MSTRG.114386	lincRNA	0.342	0	2.791	0.391
MSTRG.114390	lincRNA	0.594	0.409	4.383	11.327
MSTRG.114396	lincRNA	0.089	0.4	0.594	0.666
MSTRG.114397	lincRNA	0.529	1.219	0.138	0.331
MSTRG.11442	lincRNA	0.846	3.467	1.167	1.259
MSTRG.114569	lincRNA	11.022	26.289	6.505	5.326
MSTRG.114570	lincRNA	1.415	0	0.424	0.253
MSTRG.11461	lincRNA	0.83	3.64	1.56	2.196
MSTRG.114610	lincRNA	0	2.575	0	0
MSTRG.114736	lincRNA	0.049	0	0.414	0.198
MSTRG.114748	lincRNA	4.262	1.01	7.874	14.897
MSTRG.11478	lincRNA	0.797	0	0	0
MSTRG.1149	lincRNA	1.131	0	0.191	0.845
MSTRG.114911	lincRNA	0	0	0.085	0.092
MSTRG.114950	lincRNA	0	0.628	0.032	0.018
MSTRG.114960	lincRNA	1.057	0	0.265	0
MSTRG.115000	lincRNA	1.318	3.958	2.557	2.573
MSTRG.115040	lincRNA	0.48	0	0.615	0.119
MSTRG.115044	lincRNA	0.13	0	0.085	0.607
MSTRG.115063	lincRNA	10.314	5.678	5.486	7.118
MSTRG.115073	lincRNA	2.245	3.986	3.109	2.706
MSTRG.115104	lincRNA	0.586	1.674	1.029	0.832
MSTRG.115132	lincRNA	0.065	0	0.053	0
MSTRG.115148	lincRNA	1.952	4.595	2.833	3.497
MSTRG.115165	lincRNA	0	0	0.042	0
MSTRG.115260	lincRNA	0	0	0.042	0
MSTRG.115277	lincRNA	0.342	1.656	1.39	1.604
MSTRG.115325	lincRNA	3.734	5.796	9.423	4.889
MSTRG.115331	lincRNA	0.756	0	0.722	0
MSTRG.115342	lincRNA	0.366	0.482	0.233	0.244
MSTRG.115354	lincRNA	0	1.383	0	0
MSTRG.115539	lincRNA	0	0	1.273	0.101
MSTRG.115611	lincRNA	0.732	0	0.308	0.648
MSTRG.115641	lincRNA	0	0	0.403	0.551
MSTRG.115709	lincRNA	0	1.711	0.255	0.689
MSTRG.115756	lincRNA	1.838	4.149	2.791	2.913
MSTRG.115794	lincRNA	0.683	14.132	7.768	1.103
MSTRG.115844	lincRNA	1.578	0	0.244	0.101
MSTRG.115990	lincRNA	0.431	0.528	0.233	0.257
MSTRG.116095	lincRNA	0.065	0.064	0.127	0.051
MSTRG.116736	lincRNA	4.409	6.388	11.238	9.296
MSTRG.116769	lincRNA	0.138	1.447	0.944	0.207
MSTRG.116770	lincRNA	0	0.209	0	0.326
MSTRG.116928	lincRNA	0	0.027	0.021	0
MSTRG.11699	lincRNA	0	0	0.233	0
MSTRG.116990	lincRNA	0.106	0.173	0.106	0.221
MSTRG.117146	lincRNA	0.155	0	0.159	0.11
MSTRG.117253	lincRNA	2.269	5.105	3.831	4.094
MSTRG.117272	lincRNA	0.675	0	1.549	0.974
MSTRG.117318	lincRNA	1.871	2.211	3.566	4.646
MSTRG.117330	lincRNA	0.122	3.758	1.581	1.654
MSTRG.117335	lincRNA	3.734	5.878	4.637	4.967
MSTRG.117340	lincRNA	0.83	0.091	0.329	0.464
MSTRG.117346	lincRNA	0.683	0	0.393	0.689
MSTRG.117361	lincRNA	0	1.192	0.637	1.682
MSTRG.117412	lincRNA	0.927	0.783	1.602	1.342
MSTRG.117566	lincRNA	0	0.246	0.042	0.432
MSTRG.117572	lincRNA	0.114	0	0.117	0.639
MSTRG.117794	lincRNA	0	0	0.096	0.051
MSTRG.117811	lincRNA	0.634	0	0.34	1.503
MSTRG.117861	lincRNA	0.773	0.045	1.019	0.267
MSTRG.117869	lincRNA	0.48	0	0.393	0.161
MSTRG.117900	lincRNA	325.77	14.778	21.309	27.878
MSTRG.117975	lincRNA	1.879	1.356	2.494	2.605
MSTRG.118078	lincRNA	0	0	1.836	0.096
MSTRG.118127	lincRNA	3.245	7.671	6.197	9.815
MSTRG.118170	lincRNA	0	0	0.032	0.096
MSTRG.118292	lincRNA	0	0.045	0	0
MSTRG.118306	lincRNA	0.374	0	0.085	0
MSTRG.118318	lincRNA	0	0	0.032	0
MSTRG.118517	lincRNA	0.081	1.283	0	0
MSTRG.118518	lincRNA	0.22	11.192	2.812	5.882
MSTRG.118587	lincRNA	0	3.057	0.446	0.207
MSTRG.118661	lincRNA	0	0	0.265	0.616
MSTRG.118666	lincRNA	0.041	0	1.613	0.271
MSTRG.118696	lincRNA	0.586	0	0.106	0.28
MSTRG.118783	lincRNA	0.7	0	0.297	0.588
MSTRG.118785	lincRNA	0	1.638	0.265	0.083
MSTRG.118802	lincRNA	1.204	0	0.509	0.588
MSTRG.118821	lincRNA	0	0	0	0.041
MSTRG.118961	lincRNA	0.203	0.437	0.233	0.662
MSTRG.118994	lincRNA	0.732	0	0.032	0.124
MSTRG.119235	lincRNA	0.138	3.494	0.159	0.069
MSTRG.119357	lincRNA	2.945	4.55	0.52	0.257
MSTRG.119452	lincRNA	0	0	0.042	0.17
MSTRG.119459	lincRNA	0	0	0.064	0
MSTRG.119510	lincRNA	0	0	0.138	0.198
MSTRG.119533	lincRNA	0.081	0	0	0
MSTRG.119585	lincRNA	0.073	0.564	0.255	0.634
MSTRG.119854	lincRNA	0.033	0	0.032	0
MSTRG.11986	lincRNA	0	0	0.329	0.404
MSTRG.119891	lincRNA	1.545	3.886	2.112	1.81
MSTRG.119901	lincRNA	0.325	0.582	0.255	0.322
MSTRG.119936	lincRNA	0.114	1.074	0.35	0.579
MSTRG.120023	lincRNA	1.773	0.928	0.403	0.749
MSTRG.120072	lincRNA	0.464	0	0.064	0
MSTRG.120096	lincRNA	1.684	3.158	1.751	1.925
MSTRG.120100	lincRNA	0.765	1.529	1.422	0.933
MSTRG.120180	lincRNA	0.203	1.483	6.123	1.061
MSTRG.120310	lincRNA	17.781	10.583	1.666	2.049
MSTRG.120329	lincRNA	0.976	0	0.159	0.175
MSTRG.120339	lincRNA	0	10.155	1.931	4.241
MSTRG.120582	lincRNA	26.005	3.676	77.33	53.499
MSTRG.120583	lincRNA	1.936	4.959	2.26	1.333
MSTRG.120612	lincRNA	3.457	16.789	3.916	6.525
MSTRG.120616	lincRNA	236.23	0.428	5.274	4.77
MSTRG.120629	lincRNA	0	0	0.902	1.659
MSTRG.120648	lincRNA	49.439	2.32	2.409	0.446
MSTRG.120651	lincRNA	0	0.564	0.265	0.147
MSTRG.120704	lincRNA	0	1.183	0.096	1.098
MSTRG.120709	lincRNA	0.96	1.929	2.091	2.964
MSTRG.120737	lincRNA	0.22	0.655	0.775	0.924
MSTRG.120826	lincRNA	0.057	0	0.096	0.345
MSTRG.120840	lincRNA	0	0	0.138	0
MSTRG.120860	lincRNA	1.025	0.801	2.473	5.284
MSTRG.120861	lincRNA	0.846	0	2.557	9.751
MSTRG.121019	lincRNA	5.515	2.084	2.451	2.936
MSTRG.121072	lincRNA	0.675	0	0.233	0.423
MSTRG.121093	lincRNA	0	0	0.318	0.147
MSTRG.121119	lincRNA	0	0	0	0.018
MSTRG.121124	lincRNA	0	0	0.053	0.611
MSTRG.121197	lincRNA	0	0.946	0.159	0.055
MSTRG.121230	lincRNA	0	0	2.961	0.092
MSTRG.121277	lincRNA	0	0	0.064	0.395
MSTRG.121292	lincRNA	0.138	0	0.064	0.018
MSTRG.121315	lincRNA	3.245	2.366	1.242	1.273
MSTRG.121333	lincRNA	0	0	0.149	0
MSTRG.121337	lincRNA	0	0	0.053	0.165
MSTRG.121340	lincRNA	0.39	1.738	0.371	0.372
MSTRG.121406	lincRNA	0.26	0.946	0.17	0.377
MSTRG.121426	lincRNA	0	0	0	0.041
MSTRG.121461	lincRNA	0	0	0.159	0
MSTRG.121485	lincRNA	0.325	6.424	0.265	0.712
MSTRG.121525	lincRNA	0.952	0	0.86	0.588
MSTRG.121636	lincRNA	0.252	0	0.053	0.064
MSTRG.121682	lincRNA	0.553	0	0.053	0
MSTRG.121689	lincRNA	0	0	0	0.129
MSTRG.121696	lincRNA	0	1.911	0	0
MSTRG.121706	lincRNA	0.789	3.667	1.772	1.631
MSTRG.121720	lincRNA	0	0	0.191	0.152
MSTRG.121722	lincRNA	2.831	5.742	3.046	4.145
MSTRG.121725	lincRNA	0.83	2.83	2.366	2.15
MSTRG.121727	lincRNA	0	0	0.011	0.023
MSTRG.121743	lincRNA	3.595	3.494	3.226	3.69
MSTRG.121798	lincRNA	0	0.337	0.011	0.009
MSTRG.121934	lincRNA	1.188	0	0.212	1.029
MSTRG.121935	lincRNA	0.252	1.019	0.191	0.689
MSTRG.121936	lincRNA	10.623	10.601	8.129	9.07
MSTRG.121940	lincRNA	0.268	0.009	0.127	0.225
MSTRG.121941	lincRNA	0	0	0.117	1.094
MSTRG.121975	lincRNA	0	0	0.011	0
MSTRG.122029	lincRNA	0.992	0	7.715	1.571
MSTRG.122051	lincRNA	0	0	0	0.009
MSTRG.122192	lincRNA	0.065	0	0.318	0.437
MSTRG.122194	lincRNA	0	0	0.085	0.368
MSTRG.122300	lincRNA	0.008	0	0.011	0.009
MSTRG.122317	lincRNA	0.797	1.274	1.029	1.383
MSTRG.122334	lincRNA	0.155	1.611	1.082	1.287
MSTRG.122349	lincRNA	0.7	1.228	1.093	0.914
MSTRG.122412	lincRNA	0	0	0.18	0.331
MSTRG.122413	lincRNA	0	0	0.318	1.457
MSTRG.122435	lincRNA	0	0	0.308	0.482
MSTRG.122439	lincRNA	0.903	0	0.117	1.098
MSTRG.12245	lincRNA	0.927	0	0	0
MSTRG.122463	lincRNA	0	0	0.074	0.023
MSTRG.122465	lincRNA	0.805	0.637	0.403	0.662
MSTRG.122467	lincRNA	1.098	0.51	0.159	0.326
MSTRG.122522	lincRNA	5.173	2.084	3.311	3.088
MSTRG.122597	lincRNA	0	0	0.159	0.17
MSTRG.122608	lincRNA	1.375	2.457	9.837	9.774
MSTRG.122609	lincRNA	0.187	0.018	0.424	0.501
MSTRG.122615	lincRNA	3.953	3.658	8.383	7.894
MSTRG.122632	lincRNA	7.036	24.232	14.995	16.308
MSTRG.122717	lincRNA	0.041	0	0.011	0.055
MSTRG.122718	lincRNA	0	0	0	0.018
MSTRG.12272	lincRNA	0.008	0	0.011	0
MSTRG.122753	lincRNA	0	0	0.52	0
MSTRG.122786	lincRNA	0	0	0.244	0
MSTRG.122850	lincRNA	1.92	0	0.096	0.887
MSTRG.122871	lincRNA	1.692	0.692	2.802	0.887
MSTRG.122910	lincRNA	0	0	0.021	0.074
MSTRG.122912	lincRNA	0	0	0.042	0
MSTRG.122955	lincRNA	0	0	0	0.028
MSTRG.122987	lincRNA	0.138	4.177	0.552	0.492
MSTRG.122988	lincRNA	0	0	0	0.023
MSTRG.122995	lincRNA	0	0	0	0.018
MSTRG.123049	lincRNA	0	0	0.117	0
MSTRG.123069	lincRNA	0	0.337	0	0
MSTRG.123150	lincRNA	0	0	0.265	0.041
MSTRG.123152	lincRNA	0	0.055	0.021	0.032
MSTRG.123205	lincRNA	0	0	0.032	0
MSTRG.123218	lincRNA	0.179	0.328	1.051	0.735
MSTRG.123237	lincRNA	0	0	0.117	0.078
MSTRG.123241	lincRNA	0	0	2.961	4.627
MSTRG.123249	lincRNA	1.106	0	0.488	0.735
MSTRG.123283	lincRNA	0.407	0	0	0
MSTRG.123290	lincRNA	0	0	0.117	0
MSTRG.123299	lincRNA	0	0	0.053	0.005
MSTRG.123420	lincRNA	0	0	0.106	0
MSTRG.123422	lincRNA	0.862	2.238	1.974	1.663
MSTRG.123431	lincRNA	0.708	0	0.106	0.616
MSTRG.123529	lincRNA	0	8.481	2.207	0.225
MSTRG.123541	lincRNA	0	0	0.467	0.018
MSTRG.123637	lincRNA	3.042	2.976	2.165	6.888
MSTRG.123641	lincRNA	0	0	0.17	0.06
MSTRG.123749	lincRNA	0.374	0	0.233	0.124
MSTRG.123764	lincRNA	1.968	2.921	2.366	2.38
MSTRG.12379	lincRNA	0	0	0.149	0.083
MSTRG.12381	lincRNA	0.163	0.673	0.117	0.032
MSTRG.123877	lincRNA	2.733	2.475	1.401	1.617
MSTRG.123970	lincRNA	0	0	0	0.354
MSTRG.123984	lincRNA	2.513	0.664	4.648	6.465
MSTRG.124012	lincRNA	0.846	2.557	2.165	0.937
MSTRG.124042	lincRNA	3.018	0.719	0	0
MSTRG.124213	lincRNA	1.391	0.701	0.838	0.556
MSTRG.124338	lincRNA	0.008	0	0.032	0.014
MSTRG.124381	lincRNA	1.326	0.146	0.127	0.34
MSTRG.124389	lincRNA	0.228	4.177	11.376	1.856
MSTRG.124514	lincRNA	0	0	0.711	0
MSTRG.124515	lincRNA	0	0	0.053	0.17
MSTRG.124516	lincRNA	0	0	0.18	0.133
MSTRG.124590	lincRNA	0	1.447	0.042	0.023
MSTRG.124707	lincRNA	0.781	0	0	0.055
MSTRG.1248	lincRNA	3.099	2.493	2.398	1.939
MSTRG.12485	lincRNA	0	0	0.117	0.023
MSTRG.12486	lincRNA	0.114	0.027	0.096	0.051
MSTRG.124864	lincRNA	0	0	1.358	0.106
MSTRG.124874	lincRNA	0.748	2.357	1.125	1.466
MSTRG.125031	lincRNA	1.765	0	0.223	0
MSTRG.125228	lincRNA	0.781	0	0.393	0.161
MSTRG.125350	lincRNA	0.537	0.246	0.743	1.121
MSTRG.125365	lincRNA	0	0	0.021	0
MSTRG.125375	lincRNA	0	0	0.711	0
MSTRG.125457	lincRNA	3.555	6.461	6.834	7.099
MSTRG.125484	lincRNA	0.504	2.029	0.074	0.358
MSTRG.125493	lincRNA	0.22	0	1.135	0.133
MSTRG.125559	lincRNA	0.155	0.009	0.509	0.57
MSTRG.125623	lincRNA	0.35	0	0.382	1.705
MSTRG.125680	lincRNA	22.125	10.11	66.633	178.055
MSTRG.125807	lincRNA	0.366	0	0	0
MSTRG.125826	lincRNA	1.179	1.884	0.18	0.303
MSTRG.125827	lincRNA	0	0.091	0.647	0.956
MSTRG.125877	lincRNA	1.489	0	1.04	0.147
MSTRG.125883	lincRNA	0.293	0.191	0.478	0.556
MSTRG.125995	lincRNA	0	0	0.064	0.009
MSTRG.125996	lincRNA	0	0	0.021	0
MSTRG.125997	lincRNA	0.374	0	0	0
MSTRG.126020	lincRNA	0	0	3.396	0.317
MSTRG.126022	lincRNA	6.076	3.767	7.959	11.942
MSTRG.126109	lincRNA	0	0	0	0.087
MSTRG.126143	lincRNA	0	0	0	0.276
MSTRG.126223	lincRNA	0.098	0	0.934	0.62
MSTRG.126293	lincRNA	3.197	6.324	4.553	6.24
MSTRG.126511	lincRNA	0.944	0.883	0.424	0.381
MSTRG.126589	lincRNA	0.39	0	0	1.061
MSTRG.126662	lincRNA	1.179	1.92	1.284	1.558
MSTRG.126734	lincRNA	296967	56581.8	41824.9	80855.9
MSTRG.127001	lincRNA	0	0	0.127	0
MSTRG.127012	lincRNA	0	0	0.042	0.009
MSTRG.12730	lincRNA	0.098	0	0.17	0.087
MSTRG.127511	lincRNA	0.179	0	0.669	0.037
MSTRG.127512	lincRNA	0	0.437	0.042	0.023
MSTRG.127516	lincRNA	0.643	0	0	0
MSTRG.127801	lincRNA	0	0	0.287	1.562
MSTRG.127855	lincRNA	0	0	0.096	0.188
MSTRG.1279	lincRNA	0.098	0	0.329	0.473
MSTRG.127907	lincRNA	0	1.128	1.189	0.662
MSTRG.128064	lincRNA	0	0	0.106	0.689
MSTRG.128185	lincRNA	0.024	0	0	0
MSTRG.1282	lincRNA	0.512	0.855	0.764	1.424
MSTRG.128229	lincRNA	0.773	0.983	2.101	4.691
MSTRG.128298	lincRNA	0	0	0.053	0.101
MSTRG.128388	lincRNA	0	0	0.106	0
MSTRG.128473	lincRNA	0	0	0.096	0
MSTRG.128525	lincRNA	0	0.61	0.562	0.809
MSTRG.128539	lincRNA	4.197	4.459	2.409	3.216
MSTRG.128541	lincRNA	0	0	0	0.041
MSTRG.128594	lincRNA	0.903	2.466	1.889	1.921
MSTRG.128673	lincRNA	0	0.255	0.011	0.023
MSTRG.128695	lincRNA	10.46	19.118	8.532	12.411
MSTRG.128775	lincRNA	4.295	0	0.828	26.012
MSTRG.128807	lincRNA	0.13	0	0.159	0.57
MSTRG.128886	lincRNA	0	0	0.053	0.106
MSTRG.128927	lincRNA	0.089	0	0.435	0.115
MSTRG.128932	lincRNA	0	0	0.042	0.051
MSTRG.128989	lincRNA	0	0	0.021	0.014
MSTRG.128990	lincRNA	0.081	0.009	0.011	0.014
MSTRG.129000	lincRNA	0.252	0.337	0.244	0.207
MSTRG.129008	lincRNA	0	0	0.17	0
MSTRG.129012	lincRNA	0.578	0	0.053	0.161
MSTRG.129027	lincRNA	0.537	0	1.263	0.795
MSTRG.129273	lincRNA	0.691	1.274	0.297	0.51
MSTRG.12929	lincRNA	3.953	3.876	2.611	6.571
MSTRG.129339	lincRNA	0	6.388	0.488	0.322
MSTRG.129409	lincRNA	0.659	1.365	0.35	0.404
MSTRG.129524	lincRNA	1.944	7.953	8.373	10.84
MSTRG.129634	lincRNA	0	0	0.042	0
MSTRG.129638	lincRNA	0.464	1.274	1.602	2.095
MSTRG.129671	lincRNA	0.089	0.118	0.17	0.133
MSTRG.129684	lincRNA	0.822	0.937	0.552	0.845
MSTRG.129769	lincRNA	0	0	0.106	0.372
MSTRG.129778	lincRNA	0.553	0.464	2.101	1.02
MSTRG.129896	lincRNA	0.374	5.105	0.106	0.225
MSTRG.129930	lincRNA	2.18	4.686	14.56	4.232
MSTRG.130050	lincRNA	0.748	0.473	0.966	0.974
MSTRG.130140	lincRNA	0.106	0.209	0.127	0.239
MSTRG.130209	lincRNA	0	0	0.149	0
MSTRG.13021	lincRNA	0.13	0.018	0.499	0.326
MSTRG.130275	lincRNA	0	0	0.138	0.234
MSTRG.130315	lincRNA	28.965	16.843	11.185	14.833
MSTRG.130427	lincRNA	0	0	0.531	0
MSTRG.130438	lincRNA	0	0	0.127	0
MSTRG.130451	lincRNA	3.213	12.84	0.159	1.879
MSTRG.130452	lincRNA	1.09	2.002	1.74	1.912
MSTRG.130460	lincRNA	0	1.902	0.308	1.204
MSTRG.130536	lincRNA	0.724	3.085	1.698	2.38
MSTRG.130559	lincRNA	0.756	0.073	3.587	3.285
MSTRG.130576	lincRNA	0	0.91	0.573	0.62
MSTRG.130853	lincRNA	0.447	0.51	0.541	0.942
MSTRG.130984	lincRNA	1.448	3.403	2.823	2.932
MSTRG.130985	lincRNA	0	0	0.478	0.124
MSTRG.131015	lincRNA	0	1.492	0.212	0.887
MSTRG.131065	lincRNA	0.813	0	0.891	0.57
MSTRG.131120	lincRNA	0.309	1.265	0.233	0
MSTRG.131252	lincRNA	5.043	4.113	5.423	4.926
MSTRG.131256	lincRNA	12.689	48.71	22.678	26.15
MSTRG.131258	lincRNA	0.537	1.793	0.382	0.244
MSTRG.131261	lincRNA	0	0	0.202	0.694
MSTRG.131265	lincRNA	0.423	0	2.006	1.737
MSTRG.13131	lincRNA	0	0.064	6.208	0
MSTRG.131334	lincRNA	2.456	1.238	1.21	1.447
MSTRG.131357	lincRNA	1.139	3.33	1.327	1.526
MSTRG.131367	lincRNA	1.912	0	0.053	0
MSTRG.131470	lincRNA	3.237	6.625	2.632	1.539
MSTRG.131580	lincRNA	0	1.31	0.042	0
MSTRG.131585	lincRNA	0	0	0.053	0
MSTRG.131628	lincRNA	0.155	2.994	2.282	0.17
MSTRG.131670	lincRNA	1.489	1.046	1.008	1.181
MSTRG.131675	lincRNA	2.212	0	0.138	0
MSTRG.131779	lincRNA	0	0	0.233	0.708
MSTRG.131797	lincRNA	0.309	0	0	0.046
MSTRG.131798	lincRNA	0.87	0.318	0.106	0.051
MSTRG.131805	lincRNA	0	2.384	0.35	0.096
MSTRG.131819	lincRNA	0.708	1.347	1.39	1.875
MSTRG.131857	lincRNA	0	0	0.042	0.165
MSTRG.131887	lincRNA	1.301	3.713	0.308	0.547
MSTRG.131954	lincRNA	0	0	0	0.147
MSTRG.131956	lincRNA	0.716	1.647	1.337	1.553
MSTRG.132043	lincRNA	1.106	0	1.549	3.478
MSTRG.132112	lincRNA	0	0.883	0	0
MSTRG.132168	lincRNA	0	0	0	0.028
MSTRG.132197	lincRNA	0.708	0.255	0.424	0.501
MSTRG.132214	lincRNA	0.203	2.493	3.651	0.092
MSTRG.132262	lincRNA	0.935	1.056	2.229	2.619
MSTRG.132443	lincRNA	1.798	2.757	1.072	5.165
MSTRG.132446	lincRNA	0.911	0	1.687	0.933
MSTRG.132464	lincRNA	0.041	0.783	0.244	0.106
MSTRG.132474	lincRNA	2.286	11.02	3.491	4.967
MSTRG.132478	lincRNA	0	0.318	0.255	0
MSTRG.132581	lincRNA	0	0	0.34	0.933
MSTRG.132618	lincRNA	0.309	0.036	0.499	0.317
MSTRG.132631	lincRNA	2.871	0	0.308	1.208
MSTRG.13268	lincRNA	0	0	0.393	0.91
MSTRG.132729	lincRNA	0	0	0	0.032
MSTRG.132746	lincRNA	0	0	0.361	0
MSTRG.132796	lincRNA	0	0	0.053	0.363
MSTRG.132889	lincRNA	0.041	2.238	0.297	0.239
MSTRG.132912	lincRNA	1.578	0.81	0.541	1.774
MSTRG.132943	lincRNA	0	2.548	0.7	1.167
MSTRG.132960	lincRNA	0.252	0	0	2.293
MSTRG.132964	lincRNA	0	0	0.096	0.051
MSTRG.132966	lincRNA	0.407	0	1.189	0.519
MSTRG.133079	lincRNA	0	0	0.064	0
MSTRG.133112	lincRNA	3.766	7.243	3.024	4.333
MSTRG.133126	lincRNA	0.952	4.45	2.335	2.817
MSTRG.133132	lincRNA	0	0.027	0.17	0.285
MSTRG.133218	lincRNA	0	0	1.751	2.077
MSTRG.133301	lincRNA	0.675	3.485	1.061	1.328
MSTRG.133305	lincRNA	0	0.036	0.509	0.037
MSTRG.133307	lincRNA	0	0	0.594	0.432
MSTRG.133312	lincRNA	57.337	9.982	15.186	16.174
MSTRG.133344	lincRNA	0	0	0	0.253
MSTRG.133356	lincRNA	0	0	0.138	0.427
MSTRG.133407	lincRNA	0	11.211	0.987	2.559
MSTRG.133415	lincRNA	0	0	0	0.041
MSTRG.133436	lincRNA	0	0	0.011	0
MSTRG.133437	lincRNA	0	0	0	0.064
MSTRG.133438	lincRNA	0	0	0.011	0
MSTRG.133466	lincRNA	0	0	0.223	0.285
MSTRG.13349	lincRNA	1.92	3.713	3.566	3.262
MSTRG.133526	lincRNA	1.676	11.529	1.125	0.501
MSTRG.133550	lincRNA	0	0.519	0	0.037
MSTRG.133551	lincRNA	2.456	0	0.838	0.239
MSTRG.133556	lincRNA	0	0	0.127	0.06
MSTRG.133619	lincRNA	0.309	1.875	2.462	2.794
MSTRG.133624	lincRNA	0	0.419	0.276	0.4
MSTRG.133648	lincRNA	0	0	0	0.179
MSTRG.133666	lincRNA	2.961	7.271	1.348	5.454
MSTRG.133680	lincRNA	0.553	0.591	1.39	1.227
MSTRG.133681	lincRNA	0	1.219	0	0.119
MSTRG.133721	lincRNA	0	0	0.371	0.845
MSTRG.133729	lincRNA	0	0	0.669	0.358
MSTRG.133744	lincRNA	0.366	0	0.074	0.294
MSTRG.133772	lincRNA	0	0	0	1.415
MSTRG.133776	lincRNA	0.26	0	0	0
MSTRG.133848	lincRNA	0.683	2.566	0.318	0.538
MSTRG.133928	lincRNA	0	0	0.233	0.198
MSTRG.133951	lincRNA	0	1.219	0.117	1.163
MSTRG.133970	lincRNA	0	0	0.35	0.202
MSTRG.133973	lincRNA	0.602	1.856	0.743	1.893
MSTRG.134113	lincRNA	0.26	0.537	0.817	1.186
MSTRG.134125	lincRNA	0.033	0.091	0.265	0.198
MSTRG.134127	lincRNA	1	1.875	1.114	1.424
MSTRG.134179	lincRNA	0.171	0.282	0.276	0.57
[truncated: 2,881 more rows]

## Sheet: Identified circRNA
Identified circRNA in four samples
circRNA ID	Chromsome:begin-end	Gene ID	YP-1	YP-2	OY-1	OY-2
circRNA000008	5:1095074-1097221,-	ENSSSCG00000000010	0	0	0.728422	0
circRNA000009	5:1112630-1134767,-	ENSSSCG00000000010	0	0	0	0.380127
circRNA000010	5:1126613-1128789,-	ENSSSCG00000000010	0	0	2.54948	1.33087
circRNA000012	5:1296486-1302507,-	ENSSSCG00000000014	0	0	0.910527	0
circRNA000015	5:2734256-2767456,+	ENSSSCG00000000028	0	0	0	0.380127
circRNA000019	5:3231073-3234416,+	ENSSSCG00000000035	0	0	0	0.380127
circRNA000020	5:3235589-3240154,+	ENSSSCG00000000035	0	0	0	1.14038
circRNA000023	5:3353303-3354029,+	ENSSSCG00000000036	0	0	0	0.760254
circRNA000026	5:3372610-3471014,+	ENSSSCG00000000037	0	0	0.546316	0
circRNA000028	5:3454358-3458242,+	ENSSSCG00000000037	1.26335	0	0	0
circRNA000029	5:3454358-3462302,+	ENSSSCG00000000037	0	0	2.73158	0
circRNA000030	5:3454358-3471014,+	ENSSSCG00000000037	0	0	1.09263	0
circRNA000031	5:3457118-3458242,+	ENSSSCG00000000037	1.47387	0	1.82105	0
circRNA000032	5:3457118-3462302,+	ENSSSCG00000000037	0	0	3.2779	1.71099
circRNA000038	5:3470324-3481258,+	ENSSSCG00000000037	0	0	0	0.950318
circRNA000040	5:4314501-4321292,+	ENSSSCG00000000060	0	0	0.364211	0
circRNA000042	5:4389247-4390231,-	ENSSSCG00000000064	0	2.71965	0	0.380127
circRNA000048	5:4514994-4519767,+	ENSSSCG00000000066	0	0	0	0.570191
circRNA000049	5:4581519-4589293,-	ENSSSCG00000000068	0	0	0.728422	0
circRNA000051	5:4589215-4596349,-	ENSSSCG00000000068	1.05284	0	0	0
circRNA000052	5:4594516-4599234,-	ENSSSCG00000000068	0.631543	0	0	0
circRNA000053	5:4599054-4601836,-	ENSSSCG00000000068	0	0	0	0.570191
circRNA000054	5:4599054-4608833,-	ENSSSCG00000000068	0	0	0	0.950318
circRNA000055	5:4601698-4608833,-	ENSSSCG00000000068	0	0	1.45684	4.37231
circRNA000057	5:4603985-4608833,-	ENSSSCG00000000068	0	0	0.546316	3.80169
circRNA000058	5:4603985-4611101,-	ENSSSCG00000000068	0	0	0.364211	0.380127
circRNA000059	5:4603985-4620183,-	ENSSSCG00000000068	0	0	0.364211	0
circRNA000061	5:4607779-4611101,-	ENSSSCG00000000068	0	0	1.27474	1.14038
circRNA000062	5:4607779-4623047,-	ENSSSCG00000000068	0.631543	12.9706	0	0
circRNA000064	5:4617233-4623047,-	ENSSSCG00000000068	0	0	0.364211	0
circRNA000067	5:4775101-4784298,+	ENSSSCG00000000071	0	0	2.18527	0
circRNA000069	5:4779876-4784298,+	ENSSSCG00000000071	0	0	0.910527	0
circRNA000071	5:4783979-4787591,+	ENSSSCG00000000071	0	0	0.910527	0
circRNA000075	5:5216999-5218177,-	ENSSSCG00000000076	0	0	0.546316	0
circRNA000079	5:6219650-6220122,+	ENSSSCG00000000089	0	0	0.364211	0
circRNA000080	5:6541584-6547194,-	ENSSSCG00000000095	0	0	0.546316	0
circRNA000083	5:6771299-6772570,+	ENSSSCG00000000104	0	0	0	0.760254
circRNA000084	5:6771299-6775274,+	ENSSSCG00000000104	0	5.85785	0	0
circRNA000085	5:6774341-6775274,+	ENSSSCG00000000104	0	0	0.910527	0.570191
circRNA000086	5:6774341-6776152,+	ENSSSCG00000000104	0.842325	0	0	0
circRNA000087	5:6890150-6890544,+	ENSSSCG00000000107	0	0	0.546316	0.760254
circRNA000096	5:8899086-8902213,+	ENSSSCG00000000141	0.421029	0	0	0.570191
circRNA000098	5:8910547-8910709,+	ENSSSCG00000000141	0	0	0.728422	0
circRNA000099	5:8910547-8910711,+	ENSSSCG00000000141	0	0	0.364211	0
circRNA000104	5:9700233-9703892,-	ENSSSCG00000000152	0	0	0	0.380127
circRNA000106	5:9725798-9741366,-	ENSSSCG00000000152	0.421029	0	0	0
circRNA000112	5:12442510-12443752,+	ENSSSCG00000000160	0	0	0	1.14038
circRNA000114	5:12442510-12449054,+	ENSSSCG00000000160	0.631543	0	0	1.33087
circRNA000116	5:12491736-12496099,-	ENSSSCG00000000161	0	0	0	0.380127
circRNA000123	5:13361762-13387293,-	ENSSSCG00000000167	0	0	0.728422	0.950318
circRNA000125	5:13371574-13387293,-	ENSSSCG00000000167	0	0	0.546316	0
circRNA000126	5:13377058-13378117,-	ENSSSCG00000000167	0.631543	0	0	0
circRNA000137	5:15551966-15552279,-	ENSSSCG00000000191	0	0	0.546316	0
circRNA000142	5:17673514-17694747,+	ENSSSCG00000000228	0	0	0.364211	0
circRNA000144	5:17688361-17728218,+	ENSSSCG00000000228	0	0	0	0.380127
circRNA000145	5:17691722-17694747,+	ENSSSCG00000000228	0	0	0	0.950318
circRNA000149	5:18823746-18824876,+	ENSSSCG00000000256	0	0	0.546316	0
circRNA000154	5:18967270-18967807,-	ENSSSCG00000000268	0	0	0	0.380127
circRNA000155	5:20167977-20168276,+	ENSSSCG00000000285	0	0	0	0.380127
circRNA000157	5:20330903-20332868,+	ENSSSCG00000000288	0	0	0.546316	0
circRNA000160	5:22747526-22747967,-	ENSSSCG00000000366	0	2.51056	1.27474	0
circRNA000164	5:23289254-23291084,-	ENSSSCG00000000396	0	0	0.546316	0
circRNA000166	5:23502182-23510869,+	ENSSSCG00000000402	0	0	0.546316	0
circRNA000167	5:23508236-23509186,+	ENSSSCG00000000402	0	0	1.63895	0.380127
circRNA000168	5:23508236-23510869,+	ENSSSCG00000000402	0	0	2.00316	0.950318
circRNA000171	5:23680115-23684128,-	ENSSSCG00000000406	0	0	0.910527	0
circRNA000172	5:23683161-23684128,-	ENSSSCG00000000406	5.47444	1.0462	14.9321	14.2573
circRNA000176	5:24729926-24730097,-	ENSSSCG00000000435	0	0	0.728422	0
circRNA000177	5:24729927-24730097,-	ENSSSCG00000000435	0	0	0.546316	0.380127
circRNA000180	5:24705701-24817542,+	ENSSSCG00000000439	0	0	0	0.380127
circRNA000181	JH118928.1:45138-45309,-	ENSSSCG00000000441	0	0	0.728422	0
circRNA000182	JH118928.1:45139-45309,-	ENSSSCG00000000441	0	0	0	0.380127
circRNA000183	5:25918573-25923619,-	ENSSSCG00000000455	0	0	0	0.380127
circRNA000184	5:25919550-25923619,-	ENSSSCG00000000455	0	0	0	0.570191
circRNA000186	5:29892330-29894186,+	ENSSSCG00000000458	0	0	0	0.380127
circRNA000189	5:29892330-29923930,+	ENSSSCG00000000458	0	0	0	0.380127
circRNA000198	5:32056660-32071815,+	ENSSSCG00000000466	0	0	0	1.14038
circRNA000199	5:32061013-32066245,+	ENSSSCG00000000466	0	0	0	1.52093
circRNA000202	5:32067782-32068240,+	ENSSSCG00000000466	0	0	0.364211	0
circRNA000203	5:33828510-33836070,+	ENSSSCG00000000475	0	0	0.910527	0.380127
circRNA000204	5:33828510-33846071,+	ENSSSCG00000000475	0.421029	0	5.82708	7.41375
circRNA000205	5:33833673-33846071,+	ENSSSCG00000000475	0	0	0.910527	1.71099
circRNA000209	5:33923728-33934071,+	ENSSSCG00000000477	0	0	0	0.570191
circRNA000211	5:33923728-33947048,+	ENSSSCG00000000477	0	0	0	0.380127
circRNA000212	5:33927678-33928557,+	ENSSSCG00000000477	0	0	0.546316	0
circRNA000214	5:33999502-34072037,-	ENSSSCG00000000478	0	0	0.364211	0
circRNA000217	5:34040697-34072037,-	ENSSSCG00000000478	0	0	0.364211	0
circRNA000220	5:34134709-34154697,-	ENSSSCG00000000478	0	0	0.364211	0
circRNA000221	5:34134709-34200867,-	ENSSSCG00000000478	0	0	0.546316	0.380127
circRNA000222	5:34152198-34154697,-	ENSSSCG00000000478	0	2.51056	2.00316	0.760254
circRNA000223	5:34152198-34200867,-	ENSSSCG00000000478	0	0	0	0.380127
circRNA000226	5:35890770-35903325,+	ENSSSCG00000000488	0	0	0	0.950318
circRNA000228	5:35894044-35908869,+	ENSSSCG00000000488	0	0	0	1.14038
circRNA000229	5:35894044-35916494,+	ENSSSCG00000000488	0	0	0	1.33087
circRNA000230	5:35903029-35908869,+	ENSSSCG00000000488	0	0	0.364211	0
circRNA000235	5:36617421-36618643,+	ENSSSCG00000000500	0	0	0.546316	0.570191
circRNA000238	5:37185162-37188829,+	ENSSSCG00000000502	0	0	0.364211	0
circRNA000240	5:37252742-37269250,-	ENSSSCG00000000504	1.68438	0	0	0
circRNA000243	5:38335075-38336140,-	ENSSSCG00000000508	0	0	1.27474	2.09112
circRNA000245	5:38338233-38341434,-	ENSSSCG00000000508	0	0	0	0.570191
circRNA000248	5:38350855-38351426,-	ENSSSCG00000000509	0	1.88292	0	1.33087
circRNA000249	5:38350855-38356438,-	ENSSSCG00000000509	0	0	0	1.52093
circRNA000251	5:38472416-38482048,+	ENSSSCG00000000511	0	0	0.546316	0
circRNA000252	5:38557793-38561578,+	ENSSSCG00000000512	0	0	0	0.380127
circRNA000255	5:38561439-38581769,+	ENSSSCG00000000512	0	0	0	0.380127
circRNA000256	5:38567659-38579044,+	ENSSSCG00000000512	0	0	0.910527	1.52093
circRNA000257	5:38567659-38580442,+	ENSSSCG00000000512	0	0	0.546316	1.52093
circRNA000258	5:38567659-38581769,+	ENSSSCG00000000512	2.31619	0	0	0
circRNA000260	5:38575946-38581769,+	ENSSSCG00000000512	0	0	0	0.570191
circRNA000266	5:42901736-42903838,-	ENSSSCG00000000522	0	0	1.09263	0
circRNA000267	5:44017838-44031310,+	ENSSSCG00000000527	0	0	0.364211	0
circRNA000278	5:46820905-46834065,-	ENSSSCG00000000534	0	0	0	0.950318
circRNA000280	5:46831511-46834065,-	ENSSSCG00000000534	0	0	1.45684	0
circRNA000291	5:48617785-48670605,-	ENSSSCG00000000543	0	0	0	0.380127
circRNA000296	5:49631608-49646121,-	ENSSSCG00000000549	0	0	0	0.380127
circRNA000297	5:49634022-49646121,-	ENSSSCG00000000549	0.421029	0	0	0
circRNA000298	5:49636129-49642185,-	ENSSSCG00000000549	0	0	0.364211	0
circRNA000299	5:50283217-50283984,-	ENSSSCG00000000552	0	3.76546	0.364211	0
circRNA000300	5:50304123-50309320,+	ENSSSCG00000000553	0	0	0.728422	1.52093
circRNA000304	5:50645242-50699658,+	ENSSSCG00000000555	0	0	0	0.380127
circRNA000306	5:50654971-50699658,+	ENSSSCG00000000555	0	0	0	0.380127
circRNA000307	5:50656495-50660921,+	ENSSSCG00000000555	0	0	0	0.570191
circRNA000310	5:50696791-50738780,+	ENSSSCG00000000555	0	0	0.546316	0
circRNA000312	5:50724810-50738780,+	ENSSSCG00000000555	0	0	0	0.950318
circRNA000313	5:50724810-50806131,+	ENSSSCG00000000555	0	0	0	1.33087
circRNA000314	5:50804773-50990139,+	ENSSSCG00000000555	0	0	0.364211	0
circRNA000315	5:50820505-50832839,+	ENSSSCG00000000555	0	0	0.728422	1.71099
circRNA000318	5:50894420-50903814,+	ENSSSCG00000000555	0	0	0.364211	0
circRNA000319	5:50900168-50910867,+	ENSSSCG00000000555	0	0	0.910527	5.32263
circRNA000340	5:54912754-54926044,+	ENSSSCG00000000571	2.10568	0	0	0
circRNA000342	5:54725892-54729869,-	ENSSSCG00000000572	1.05284	0	3.2779	5.13256
circRNA000343	5:54725892-54732290,-	ENSSSCG00000000572	0	0	0	0.570191
circRNA000354	5:56928607-56955103,-	ENSSSCG00000000587	1.8949	0	2.73158	3.99218
circRNA000355	5:56928607-56964141,-	ENSSSCG00000000587	0	0	0	1.52093
circRNA000357	5:56954995-56964141,-	ENSSSCG00000000587	0	0	0	1.71099
circRNA000359	5:57061407-57065369,-	ENSSSCG00000000588	0	0	0.728422	0.760254
circRNA000362	5:57072564-57080513,-	ENSSSCG00000000588	0	0	0.364211	0
circRNA000367	5:59928307-59952213,-	ENSSSCG00000000599	0	0	0	0.760254
circRNA000370	5:61142991-61197241,+	ENSSSCG00000000611	0	0	0.910527	0
circRNA000382	5:61500661-61504828,-	ENSSSCG00000000612	1.8949	0	5.82708	4.18224
circRNA000383	5:61500661-61514489,-	ENSSSCG00000000612	0.842325	0	0	0
circRNA000389	5:63597842-63605477,+	ENSSSCG00000000625	0	0	5.09865	8.174
circRNA000393	5:63631298-63653282,+	ENSSSCG00000000625	0	0	0	0.570191
circRNA000394	5:63658259-63664917,+	ENSSSCG00000000625	0	0	0.546316	0.380127
circRNA000397	5:64524502-64526716,-	ENSSSCG00000000649	0	0	0.364211	0
circRNA000398	5:65034545-65038516,-	ENSSSCG00000000657	0	0	0	0.380127
circRNA000400	5:65277753-65280239,+	ENSSSCG00000000660	0	0	2.18527	1.33087
circRNA000406	GL894246.2:16129-17637,-	ENSSSCG00000000675	0	0	0.364211	0.570191
circRNA000409	5:66479881-66481939,-	ENSSSCG00000000697	0	0	0	1.90106
circRNA000410	5:66480042-66480237,-	ENSSSCG00000000697	0	0	0	0.570191
circRNA000413	5:67971974-67981660,-	ENSSSCG00000000719	0	0	0.728422	0
circRNA000414	5:67983264-67988532,-	ENSSSCG00000000719	0	0	0	0.950318
circRNA000419	5:68113553-68128063,+	ENSSSCG00000000723	0	0	0	1.33087
circRNA000423	5:68777176-68777459,+	ENSSSCG00000000728	0	0	0.910527	0
circRNA000427	5:69176416-69193435,+	ENSSSCG00000000734	1.68438	0	0	0
circRNA000430	5:69495866-69496574,-	ENSSSCG00000000737	0	0	2.18527	0.760254
circRNA000436	5:70319576-70339367,+	ENSSSCG00000000753	4.00057	0	0.364211	0
circRNA000442	5:70361213-70362787,+	ENSSSCG00000000753	0	0	0	0.570191
circRNA000443	5:70372891-70379709,+	ENSSSCG00000000753	2.31619	0	5.82708	3.80169
circRNA000445	5:70379559-70383669,+	ENSSSCG00000000753	0	0	0	0.380127
circRNA000450	5:70384529-70384837,+	ENSSSCG00000000753	0	0	0.546316	0
circRNA000452	5:70411449-70422102,-	ENSSSCG00000000754	0	0	0	0.380127
circRNA000453	5:70413743-70414240,-	ENSSSCG00000000754	0	0	0.546316	0
circRNA000455	5:70423697-70424489,-	ENSSSCG00000000754	0	0	2.18527	0
circRNA000458	5:70515828-70595881,+	ENSSSCG00000000755	0	0	0.364211	0
circRNA000461	5:70565539-70565956,+	ENSSSCG00000000755	0	0	0.364211	0
circRNA000464	5:70576775-70588176,+	ENSSSCG00000000755	3.79006	0	2.54948	3.80169
circRNA000465	5:70576775-70595881,+	ENSSSCG00000000755	0	0	3.64211	4.75243
circRNA000466	5:70576775-70619507,+	ENSSSCG00000000755	0	0	0	0.380127
circRNA000469	5:70582740-70588176,+	ENSSSCG00000000755	0	0	0.546316	0
circRNA000470	5:70582740-70595881,+	ENSSSCG00000000755	0	9.41422	0	0
circRNA000471	5:70588008-70595881,+	ENSSSCG00000000755	0	0	0	0.570191
circRNA000472	5:70588008-70619507,+	ENSSSCG00000000755	0	0	0.728422	0.380127
circRNA000474	5:70588008-70629435,+	ENSSSCG00000000755	0	0	5.46287	12.1662
circRNA000475	5:70588008-70647555,+	ENSSSCG00000000755	2.94774	0	1.45684	6.08288
circRNA000476	5:70617985-70629435,+	ENSSSCG00000000755	0	0	0	0.380127
circRNA000477	5:70617985-70647555,+	ENSSSCG00000000755	0.421029	11.7153	1.45684	2.28119
circRNA000478	5:70620859-70629435,+	ENSSSCG00000000755	0	0	0.364211	0
circRNA000479	5:70620859-70647555,+	ENSSSCG00000000755	4.00057	0	2.54948	2.66131
circRNA000480	5:71003401-71006764,-	ENSSSCG00000000757	0	0	0	0.380127
circRNA000481	5:71630295-71642849,+	ENSSSCG00000000763	0	0	0.364211	0
circRNA000482	5:72030780-72035838,-	ENSSSCG00000000767	0	0	0	0.570191
circRNA000485	5:72209993-72221544,-	ENSSSCG00000000770	0	0	0.364211	0
circRNA000487	5:72221357-72241163,-	ENSSSCG00000000770	0	0	0	0.570191
circRNA000492	5:72241036-72247057,-	ENSSSCG00000000770	0.421029	0	1.45684	0.760254
circRNA000496	5:72244587-72252123,-	ENSSSCG00000000770	0	0	0	0.380127
circRNA000497	5:72248348-72252123,-	ENSSSCG00000000770	0	0	0.546316	1.52093
circRNA000498	5:72572850-72574222,+	ENSSSCG00000000774	0	0	1.09263	0.380127
circRNA000499	5:72572850-72575462,+	ENSSSCG00000000774	0	0	0.546316	0
circRNA000511	5:73490735-73508782,-	ENSSSCG00000000779	0	0	0.910527	0
circRNA000512	5:73490735-73514893,-	ENSSSCG00000000779	0	0	0.546316	0
circRNA000513	5:73501688-73518640,-	ENSSSCG00000000779	0	0	0.364211	0
circRNA000516	5:73514777-73520522,-	ENSSSCG00000000779	0	0	0.364211	0
circRNA000517	5:73519986-73520522,-	ENSSSCG00000000779	0	0	0.364211	0
circRNA000518	5:73766946-73775618,+	ENSSSCG00000000782	0	0	0	0.570191
circRNA000519	5:74516300-74540696,+	ENSSSCG00000000784	0	0	0	0.380127
circRNA000520	5:74537430-74545601,+	ENSSSCG00000000784	1.8949	0	0	0.570191
circRNA000530	5:76327566-76391339,+	ENSSSCG00000000793	1.26335	0	0	1.14038
circRNA000531	5:76330930-76381045,+	ENSSSCG00000000793	0	0	0	0.760254
circRNA000532	5:76330930-76391339,+	ENSSSCG00000000793	0	0	0.546316	1.33087
circRNA000533	5:76358126-76391339,+	ENSSSCG00000000793	0	0	0	0.950318
circRNA000534	5:76369648-76381045,+	ENSSSCG00000000793	0	0	0.728422	0
circRNA000535	5:76369648-76391339,+	ENSSSCG00000000793	0	0	4.18813	7.03362
circRNA000536	5:76372675-76391339,+	ENSSSCG00000000793	0	0	1.09263	0
circRNA000537	5:76380925-76391339,+	ENSSSCG00000000793	0	0	0.364211	0.760254
circRNA000540	5:77413285-77416373,-	ENSSSCG00000000795	1.68438	0	0	0
circRNA000541	5:77654671-77657988,+	ENSSSCG00000000799	0	0	0	0.380127
circRNA000544	5:78224358-78225058,+	ENSSSCG00000000801	0	0	0.364211	0
circRNA000551	5:79148741-79160617,+	ENSSSCG00000000804	0	0	0.364211	0
circRNA000554	5:79973441-79983003,-	ENSSSCG00000000807	0	0	2.36737	11.7861
circRNA000556	5:80040794-80041167,-	ENSSSCG00000000808	0	0	0	0.380127
circRNA000557	5:80082856-80083229,+	ENSSSCG00000000809	0	0	0	0.380127
circRNA000562	5:83062596-83067876,+	ENSSSCG00000000838	0	0	0.546316	0
circRNA000563	5:83062596-83082256,+	ENSSSCG00000000838	0.421029	0	0.546316	1.14038
circRNA000564	5:83080955-83082256,+	ENSSSCG00000000838	0	0	0	0.380127
circRNA000567	5:82929938-82940753,+	ENSSSCG00000000839	0	0	0.546316	0
circRNA000569	5:82622399-82625903,+	ENSSSCG00000000840	0	0	0	0.380127
circRNA000570	5:82625768-82634302,+	ENSSSCG00000000840	0	0	0.364211	0
circRNA000571	5:82625768-82636395,+	ENSSSCG00000000840	0	0	0.910527	0.950318
circRNA000572	5:82625768-82639265,+	ENSSSCG00000000840	0	3.97493	0	0.760254
circRNA000573	5:82625768-82640792,+	ENSSSCG00000000840	0	0	0	0.380127
circRNA000574	5:82636247-82640792,+	ENSSSCG00000000840	0	0	0.364211	0
circRNA000576	5:82659438-82667737,-	ENSSSCG00000000841	0	0	2.54948	1.52093
circRNA000579	5:82763394-82763925,+	ENSSSCG00000000842	0	0	0.364211	0
circRNA000582	5:83967613-83976058,-	ENSSSCG00000000846	0	0	0	0.950318
circRNA000586	5:84019799-84020599,-	ENSSSCG00000000849	0	0	0	1.14038
circRNA000601	5:86862674-86874982,-	ENSSSCG00000000869	0	0	0.364211	0
circRNA000602	5:86870596-86874982,-	ENSSSCG00000000869	0	0	0.728422	0
circRNA000604	5:86794413-86799615,+	ENSSSCG00000000870	0	0.836725	0.546316	0.570191
circRNA000605	5:87112432-87120323,-	ENSSSCG00000000873	0	0	4.18813	2.47125
circRNA000606	5:87112432-87164024,-	ENSSSCG00000000873	0	0	0	2.28119
circRNA000607	5:87119002-87161572,-	ENSSSCG00000000873	0	0	0	0.380127
circRNA000608	5:87157447-87174095,-	ENSSSCG00000000873	0	0	0.910527	1.52093
circRNA000609	5:87161460-87164024,-	ENSSSCG00000000873	0	0	0	0.380127
circRNA000610	5:87161460-87174095,-	ENSSSCG00000000873	0	0	0.364211	0
circRNA000611	5:87167847-87196099,-	ENSSSCG00000000873	0	0	0	1.33087
circRNA000613	5:87192176-87252405,-	ENSSSCG00000000873	0	0	0	0.570191
circRNA000616	5:87252273-87266366,-	ENSSSCG00000000873	1.8949	0	21.6697	10.6453
circRNA000617	5:87252273-87308493,-	ENSSSCG00000000873	0	13.8073	0.910527	1.14038
circRNA000618	5:87266265-87308493,-	ENSSSCG00000000873	0	0	0	1.14038
circRNA000619	5:87303582-87308493,-	ENSSSCG00000000873	0	0	4.73444	7.03362
circRNA000625	5:89608595-89609429,-	ENSSSCG00000000886	5.89547	17.5732	9.46919	6.65349
circRNA000626	5:89608595-89610635,-	ENSSSCG00000000886	0	7.5313	2.00316	2.09112
circRNA000628	5:89654871-89663757,-	ENSSSCG00000000887	0	0	0.546316	0
circRNA000631	5:91913256-91913535,+	ENSSSCG00000000896	0	0	0.546316	0
circRNA000634	5:92237090-92261050,-	ENSSSCG00000000900	0	0	0.546316	1.14038
circRNA000636	5:92238774-92243231,-	ENSSSCG00000000900	0	0	0	0.570191
circRNA000637	5:92253412-92261050,-	ENSSSCG00000000900	2.31619	0	0	0.570191
circRNA000640	5:92464570-92470469,+	ENSSSCG00000000901	0.842325	0	0	0
circRNA000641	5:92492202-92502405,+	ENSSSCG00000000902	0	0	0	0.760254
circRNA000642	5:92500461-92502405,+	ENSSSCG00000000902	0	0	0.364211	0
circRNA000644	5:92502062-92522814,+	ENSSSCG00000000902	7.58012	17.1546	6.37339	7.22368
circRNA000649	5:93402343-93405323,+	ENSSSCG00000000907	0	0	0.728422	0
circRNA000650	5:93635475-93636025,+	ENSSSCG00000000908	0	0	0.546316	0
circRNA000653	5:94418718-94445562,+	ENSSSCG00000000912	0	0	0	1.14038
circRNA000654	5:94425845-94439340,+	ENSSSCG00000000912	0	0	1.27474	0
circRNA000655	5:94439223-94445562,+	ENSSSCG00000000912	0	0	0	1.14038
circRNA000656	5:94439223-94451370,+	ENSSSCG00000000912	0	0	1.63895	3.80169
circRNA000659	5:94439223-94472814,+	ENSSSCG00000000912	0	0	0	0.950318
circRNA000660	5:94439223-94478927,+	ENSSSCG00000000912	0	0	0.364211	0
circRNA000661	5:94452813-94460760,+	ENSSSCG00000000912	0	0	0	1.71099
circRNA000662	5:94452813-94469563,+	ENSSSCG00000000912	0	0	0	0.950318
circRNA000663	5:94469232-94472814,+	ENSSSCG00000000912	0	0	0.910527	0
circRNA000665	5:94470560-94478927,+	ENSSSCG00000000912	0	0	0	0.950318
circRNA000666	5:96113690-96131544,+	ENSSSCG00000000915	0	0	0.364211	0
circRNA000669	5:99165945-99168902,-	ENSSSCG00000000925	2.10568	0	1.45684	2.09112
circRNA000672	5:99155768-99157091,+	ENSSSCG00000000926	0	0	0.364211	0
circRNA000673	5:99032219-99062303,-	ENSSSCG00000000927	0	0	0	0.950318
circRNA000675	5:99055436-99062303,-	ENSSSCG00000000927	0	0	3.2779	3.04144
circRNA000679	5:105210065-105250420,-	ENSSSCG00000000939	0	0	3.2779	0.950318
circRNA000680	5:105210065-105265163,-	ENSSSCG00000000939	0	0	2.18527	0.950318
circRNA000681	5:105210065-105277027,-	ENSSSCG00000000939	1.47387	0	1.45684	0
circRNA000687	5:105265059-105296870,-	ENSSSCG00000000939	0	0	0.910527	0
circRNA000688	5:105265059-105306144,-	ENSSSCG00000000939	0	0	1.45684	0
circRNA000689	5:105265059-105309621,-	ENSSSCG00000000939	0	0	0.546316	0
circRNA000691	5:105276875-105306144,-	ENSSSCG00000000939	0	0	0.364211	0.760254
circRNA000695	5:105296612-105313031,-	ENSSSCG00000000939	0	0	0.546316	0.950318
circRNA000696	5:105296612-105332428,-	ENSSSCG00000000939	0	0	0.364211	0
circRNA000708	5:108345025-108391872,+	ENSSSCG00000000953	0	0	0.364211	0
circRNA000712	5:126532-213946,-	ENSSSCG00000000955	0	0	0	0.570191
circRNA000713	5:126532-217179,-	ENSSSCG00000000955	0	0	2.00316	2.28119
circRNA000714	5:126532-226541,-	ENSSSCG00000000955	0	0	0	1.33087
circRNA000716	5:145468-217179,-	ENSSSCG00000000955	1.47387	0	3.64211	3.42157
circRNA000717	5:162935-200579,-	ENSSSCG00000000955	1.26335	0	0	0
circRNA000718	5:162935-217179,-	ENSSSCG00000000955	2.52671	2.09201	8.19445	3.61163
circRNA000719	5:200464-217179,-	ENSSSCG00000000955	10.9489	0	23.1265	20.5302
circRNA000721	5:284159-288359,-	ENSSSCG00000000955	0	0	0	0.950318
circRNA000726	5:110441060-110469054,+	ENSSSCG00000000970	0	0	0	0.570191
circRNA000727	5:110463397-110469054,+	ENSSSCG00000000970	0	0	0.546316	0
circRNA000733	5:110474512-110480398,+	ENSSSCG00000000970	0	0	0.728422	0
circRNA000739	5:110696946-110698250,-	ENSSSCG00000000973	0	0	0	0.570191
circRNA000743	7:125460-130444,-	ENSSSCG00000000985	0	0	0.364211	0.760254
circRNA000746	7:125460-160485,-	ENSSSCG00000000985	0	0	0	0.570191
circRNA000751	7:82091-105997,-	ENSSSCG00000000985	0	0.418557	2.73158	4.75243
circRNA000752	7:82091-117119,-	ENSSSCG00000000985	0	0	0.546316	0
circRNA000756	7:82091-99219,-	ENSSSCG00000000985	2.10568	0	1.09263	0
circRNA000758	7:94023-99219,-	ENSSSCG00000000985	0	0	0.546316	0
circRNA000762	7:1254621-1277433,-	ENSSSCG00000000994	0	0	0.364211	0.380127
circRNA000766	7:2977562-2978229,+	ENSSSCG00000000999	0	0	0.728422	0
circRNA000773	7:2466500-2471089,-	ENSSSCG00000001002	0	0	0	1.71099
circRNA000774	7:2470603-2471801,-	ENSSSCG00000001002	0	0	1.63895	0
circRNA000779	7:2153663-2158879,-	ENSSSCG00000001004	0	0	0	0.570191
circRNA000781	7:4595690-4597189,+	ENSSSCG00000001021	0	0	0.728422	0
circRNA000782	7:4595690-4621123,+	ENSSSCG00000001021	0	0	0.546316	0
circRNA000783	7:4620339-4621123,+	ENSSSCG00000001021	0	0	0	0.380127
circRNA000792	7:5287878-5302773,+	ENSSSCG00000001027	0	0	0.910527	0
circRNA000800	7:9881233-9904235,+	ENSSSCG00000001052	1.26335	0	0	0
circRNA000803	7:10036590-10041252,-	ENSSSCG00000001053	0	0	0.364211	0.570191
circRNA000804	7:10291893-10299841,-	ENSSSCG00000001056	0.421029	0	0	0
circRNA000807	7:10291893-10308853,-	ENSSSCG00000001056	0	0	0.546316	0.380127
circRNA000809	7:10291893-10322728,-	ENSSSCG00000001056	0	0	0	0.380127
circRNA000810	7:10297936-10299841,-	ENSSSCG00000001056	0	0	0	0.380127
circRNA000811	7:10297936-10307440,-	ENSSSCG00000001056	0	0	0.364211	0
circRNA000812	7:10297936-10308853,-	ENSSSCG00000001056	0	0	0	0.570191
circRNA000813	7:10297936-10313493,-	ENSSSCG00000001056	0	0	3.82422	4.18224
circRNA000814	7:10297936-10322728,-	ENSSSCG00000001056	0	0	0.546316	0
circRNA000815	7:10305556-10308853,-	ENSSSCG00000001056	0	0	0	0.760254
circRNA000817	7:10305556-10322728,-	ENSSSCG00000001056	0	0	0.364211	0
circRNA000821	7:12133183-12149491,+	ENSSSCG00000001061	0	0	0.910527	0
circRNA000824	7:12202503-12271827,-	ENSSSCG00000001062	0	0	0.546316	0
circRNA000829	7:14082134-14088063,+	ENSSSCG00000001070	0	0	0.364211	0
circRNA000831	7:14615396-14628406,+	ENSSSCG00000001074	0.421029	0	0.364211	0
circRNA000834	7:14649627-14663685,-	ENSSSCG00000001075	0	0	0	0.760254
circRNA000835	7:14649627-14671601,-	ENSSSCG00000001075	0	5.23021	2.36737	0
circRNA000836	7:14663496-14671601,-	ENSSSCG00000001075	1.8949	23.0121	16.7531	16.1579
circRNA000838	7:14669087-14671601,-	ENSSSCG00000001075	1.8949	0	3.82422	4.37231
circRNA000840	7:16472244-16480237,-	ENSSSCG00000001078	0	0	0.546316	0
circRNA000842	7:16831953-16834199,+	ENSSSCG00000001080	0	0	0	0.570191
circRNA000843	7:16831953-16923676,+	ENSSSCG00000001080	0	0	2.73158	0.760254
circRNA000845	7:16831953-17011103,+	ENSSSCG00000001080	0	0	0	0.380127
circRNA000852	7:16992241-17209187,+	ENSSSCG00000001080	0	0	0.364211	0
circRNA000857	7:17209020-17354126,+	ENSSSCG00000001080	0	0	0	0.760254
circRNA000860	7:20297316-20312260,-	ENSSSCG00000001085	0	0	0	1.52093
circRNA000862	7:20415576-20423283,+	ENSSSCG00000001087	0	0	1.82105	0
circRNA000871	7:20645944-20651095,-	ENSSSCG00000001092	0	0	0.546316	0
circRNA000874	7:20770730-20779896,-	ENSSSCG00000001097	0	0	0	0.760254
circRNA000878	7:21046620-21071076,-	ENSSSCG00000001099	0	0	0.364211	0
circRNA000879	7:21066189-21071076,-	ENSSSCG00000001099	0	0	0	0.380127
circRNA000884	7:21521430-21561703,+	ENSSSCG00000001100	0	0	0	0.570191
circRNA000886	7:21551601-21556652,+	ENSSSCG00000001100	0	0	0	1.14038
circRNA000887	7:21551601-21561703,+	ENSSSCG00000001100	0	0	0	0.570191
circRNA000893	7:21571925-21618500,+	ENSSSCG00000001100	0	0	0.364211	0
circRNA000894	7:21583139-21589708,+	ENSSSCG00000001100	4.00057	0	0	2.28119
circRNA000895	7:21583139-21643079,+	ENSSSCG00000001100	0	0	0.364211	0
circRNA000904	7:25228358-25229283,+	ENSSSCG00000001242	1.26335	0	0	0
circRNA000909	7:26926481-26927861,-	ENSSSCG00000001376	3.57955	0	2.54948	6.84356
circRNA000910	7:27282582-27282743,+	ENSSSCG00000001391	0	0.418557	0	0
circRNA000913	7:27472629-27473326,+	ENSSSCG00000001413	0	0	0	0.950318
circRNA000914	7:27472632-27473326,+	ENSSSCG00000001413	0	0	0	0.760254
circRNA000916	7:29520213-29521537,+	ENSSSCG00000001471	0	0	0	1.52093
circRNA000928	7:32783247-32796907,-	ENSSSCG00000001493	0	0	0	0.380127
circRNA000931	7:33176229-33196881,-	ENSSSCG00000001497	0	0	0	0.380127
circRNA000932	7:33183954-33196881,-	ENSSSCG00000001497	0	11.0877	0	0
circRNA000934	7:33242141-33263635,-	ENSSSCG00000001498	0	0	0.546316	1.52093
circRNA000937	7:33263483-33263635,-	ENSSSCG00000001498	0	0	0	0.380127
circRNA000945	7:33583168-33586587,+	ENSSSCG00000001499	0	0	0.728422	0
circRNA000948	7:33603200-33611612,+	ENSSSCG00000001499	0	0	0.364211	0
circRNA000951	7:33619019-33630651,+	ENSSSCG00000001499	0	0	0	0.950318
circRNA000954	7:33633383-33636258,+	ENSSSCG00000001499	0	0	0	0.950318
circRNA000956	7:33633383-33643433,+	ENSSSCG00000001499	0.421029	0	0	0
circRNA000963	7:33665913-33679390,+	ENSSSCG00000001499	0.421029	0	0	0
circRNA000968	7:33676047-33717727,+	ENSSSCG00000001499	0	0	0.364211	0
circRNA000977	7:33706450-33715361,+	ENSSSCG00000001499	0	0	0.546316	0
circRNA000995	7:35672295-35676214,+	ENSSSCG00000001534	0	0	0.546316	0
circRNA000997	7:35685908-35703021,+	ENSSSCG00000001534	0	0	0.546316	0
circRNA000998	7:35702431-35743335,+	ENSSSCG00000001534	0	0	0.364211	0
circRNA001000	7:35762442-35762647,+	ENSSSCG00000001534	0	0	0	0.570191
circRNA001004	7:36377896-36392170,-	ENSSSCG00000001549	0	0	0	0.380127
circRNA001005	7:36377896-36412083,-	ENSSSCG00000001549	0	0	0	0.380127
circRNA001006	7:36383965-36412083,-	ENSSSCG00000001549	0	0	0.546316	0
circRNA001009	7:36591622-36603448,-	ENSSSCG00000001554	0	0	0	0.570191
circRNA001010	7:36591622-36606643,-	ENSSSCG00000001554	0	0	0.364211	0
circRNA001012	7:36615305-36618555,-	ENSSSCG00000001554	0	0	0.364211	0
circRNA001019	7:37126122-37133150,-	ENSSSCG00000001563	0.421029	0	0	0
circRNA001022	7:37471723-37472143,+	ENSSSCG00000001569	0	0	0.728422	0
circRNA001023	7:37471723-37478260,+	ENSSSCG00000001569	0	0	0	0.380127
circRNA001039	JH118526.1:137341-137704,+	ENSSSCG00000001598	0.631543	0	0	0
circRNA001044	7:43121207-43121467,+	ENSSSCG00000001641	0	6.27602	0	0
circRNA001045	7:43121207-43150180,+	ENSSSCG00000001641	0	0	0	0.760254
circRNA001046	7:43147748-43179962,+	ENSSSCG00000001641	0	0	0.364211	0
circRNA001047	7:43157538-43167861,+	ENSSSCG00000001641	0	0	0	0.760254
circRNA001048	7:43157538-43168820,+	ENSSSCG00000001641	0	0	0.364211	1.14038
circRNA001050	7:43157538-43188555,+	ENSSSCG00000001641	0	0	0	0.380127
circRNA001051	7:43167753-43179962,+	ENSSSCG00000001641	0	0	0	0.760254
circRNA001052	7:43181418-43186706,+	ENSSSCG00000001641	0	0	0	0.950318
circRNA001056	7:43350887-43352570,+	ENSSSCG00000001646	0	0	0.546316	0.570191
circRNA001059	7:43370411-43372526,+	ENSSSCG00000001646	0	0	0.910527	0.570191
circRNA001060	7:43370411-43376051,+	ENSSSCG00000001646	0	0	2.54948	2.47125
circRNA001064	7:43491302-43491521,-	ENSSSCG00000001653	0	0	0	0.570191
circRNA001066	7:43617654-43619203,-	ENSSSCG00000001658	0	5.43929	0	0
circRNA001068	7:43688466-43689109,+	ENSSSCG00000001660	0	0	0	0.380127
circRNA001069	7:43863781-43865587,-	ENSSSCG00000001667	0	3.76546	0	0
circRNA001070	7:43865383-43870413,-	ENSSSCG00000001667	1.47387	0	0	0
circRNA001071	7:43870108-43873122,-	ENSSSCG00000001667	0	0	0.364211	0
circRNA001075	7:44967435-44973556,+	ENSSSCG00000001697	0	0	0.364211	0
circRNA001078	7:45327223-45329571,+	ENSSSCG00000001708	1.68438	0	0.364211	0
circRNA001079	7:45327223-45335812,+	ENSSSCG00000001708	0	0	0	0.950318
circRNA001080	7:45751995-45762341,-	ENSSSCG00000001709	0	0	0.546316	0.570191
circRNA001096	7:48721996-48724829,-	ENSSSCG00000001727	0	0	0.364211	0
circRNA001098	7:50110803-50127631,-	ENSSSCG00000001732	0	0	0.364211	0
circRNA001099	7:50119424-50126430,-	ENSSSCG00000001732	0	0	0.364211	0
circRNA001100	7:50119424-50127631,-	ENSSSCG00000001732	0.421029	0	0.546316	0.950318
circRNA001101	7:50120824-50127631,-	ENSSSCG00000001732	0	0	0.364211	0
circRNA001104	7:53206136-53207536,+	ENSSSCG00000001757	0	0	0.364211	0
circRNA001105	7:53316408-53325742,-	ENSSSCG00000001761	1.05284	0	0	0
circRNA001106	7:53319727-53324125,-	ENSSSCG00000001761	0.631543	0	0	0
circRNA001110	7:54527453-54530118,+	ENSSSCG00000001779	0	0	0	0.570191
circRNA001112	7:54561289-54571581,+	ENSSSCG00000001780	0	0	0	0.760254
circRNA001118	7:56634380-56650308,-	ENSSSCG00000001793	2.31619	0	0	0
circRNA001123	7:57270686-57280795,+	ENSSSCG00000001799	1.47387	7.74038	9.28708	10.0751
circRNA001124	7:57275721-57280795,+	ENSSSCG00000001799	0	0	0.728422	0
circRNA001130	7:57602685-57603071,-	ENSSSCG00000001805	0	0	0.546316	0
circRNA001131	7:57602685-57604970,-	ENSSSCG00000001805	0	0	0	0.380127
circRNA001133	7:57604785-57612229,-	ENSSSCG00000001805	0	0	0.364211	0
circRNA001134	7:57608749-57609962,-	ENSSSCG00000001805	0	0	0.546316	0.380127
circRNA001140	7:57815438-57839892,+	ENSSSCG00000001808	0	0	1.27474	0.950318
circRNA001155	7:57942274-57968188,-	ENSSSCG00000001810	0	0	0.728422	0
circRNA001159	7:58178874-58186637,-	ENSSSCG00000001814	0	2.30109	0	0
circRNA001162	7:58507982-58508405,+	ENSSSCG00000001818	0	0	1.27474	1.33087
circRNA001163	7:58531066-58531916,+	ENSSSCG00000001819	0	5.64838	0	0
circRNA001165	7:58562629-58562839,+	ENSSSCG00000001821	0	0	1.27474	0
circRNA001169	7:59658416-59661870,+	ENSSSCG00000001835	0	0	0.364211	0
circRNA001172	7:59732993-59742347,+	ENSSSCG00000001835	0	0	0.364211	0
circRNA001175	7:59836314-59846083,+	ENSSSCG00000001837	0	6.69457	0	0
circRNA001182	7:60540873-60543228,-	ENSSSCG00000001852	0	0	1.45684	1.14038
circRNA001184	7:60542767-60544948,-	ENSSSCG00000001852	0	0	0	0.570191
circRNA001185	7:60544560-60544948,-	ENSSSCG00000001852	0	0	0.364211	0
circRNA001186	7:60544560-60546813,-	ENSSSCG00000001852	0	0	4.73444	6.08288
circRNA001188	7:60546647-60549480,-	ENSSSCG00000001852	0	0	0.364211	0
circRNA001189	7:60959605-60962443,+	ENSSSCG00000001862	0	0	1.09263	1.33087
circRNA001190	7:60959605-60968464,+	ENSSSCG00000001862	0	0	0	0.380127
circRNA001191	7:60959605-60977347,+	ENSSSCG00000001862	0	0	0	0.570191
circRNA001194	7:60967185-60977347,+	ENSSSCG00000001862	0	0	2.73158	2.09112
circRNA001199	7:61606816-61633213,-	ENSSSCG00000001865	0	0	0	0.950318
circRNA001209	7:61907053-61909090,-	ENSSSCG00000001868	0	4.81165	0	0.570191
circRNA001211	7:62242998-62246274,+	ENSSSCG00000001871	0	0.627641	0.364211	0.380127
circRNA001216	7:62801434-62806164,+	ENSSSCG00000001878	9.2645	12.1339	3.2779	5.51269
circRNA001217	7:62801434-62812567,+	ENSSSCG00000001878	10.9489	0	1.45684	3.2315
circRNA001218	7:62801434-62830084,+	ENSSSCG00000001878	0	0	0	1.14038
circRNA001219	7:62801434-62836071,+	ENSSSCG00000001878	0	0	0.910527	1.90106
circRNA001220	7:62812461-62836071,+	ENSSSCG00000001878	0	0	0	1.14038
circRNA001221	7:62827071-62830084,+	ENSSSCG00000001878	0	0	0.910527	0
circRNA001222	7:62827071-62836071,+	ENSSSCG00000001878	0	0	0.364211	0.570191
circRNA001225	7:62835977-62846879,+	ENSSSCG00000001878	0	0	0	0.380127
circRNA001227	7:62907646-62911473,+	ENSSSCG00000001880	0	0	0.364211	0.570191
circRNA001231	7:63538956-63542549,+	ENSSSCG00000001903	0	0	0	1.14038
circRNA001232	7:63538956-63557113,+	ENSSSCG00000001903	0	8.36802	4.37023	9.12474
circRNA001233	7:63556777-63557113,+	ENSSSCG00000001903	0	0	0.364211	1.14038
circRNA001235	7:63592273-63593942,-	ENSSSCG00000001904	0	0	0.546316	0
circRNA001236	7:64433168-64448771,+	ENSSSCG00000001918	0	0	0	0.950318
circRNA001238	7:64448637-64452436,+	ENSSSCG00000001918	0	0	3.46	2.85138
circRNA001244	7:64707611-64736230,-	ENSSSCG00000001921	0	0	0.364211	0
circRNA001245	7:64736230-64740625,-	ENSSSCG00000001921	0	0	0.364211	0
circRNA001246	7:65184010-65184904,+	ENSSSCG00000001922	0	0	0.546316	1.52093
circRNA001249	7:65188148-65192947,+	ENSSSCG00000001922	0	0	0.910527	0
circRNA001259	7:65565441-65566130,+	ENSSSCG00000001930	0	0	0	1.33087
circRNA001261	7:65662307-65669379,+	ENSSSCG00000001934	0	0	0	0.380127
circRNA001263	7:65664181-65680360,+	ENSSSCG00000001934	1.26335	0	0	0
circRNA001265	7:65666366-65694943,+	ENSSSCG00000001934	0	0	0.728422	0
circRNA001266	7:65666366-65709436,+	ENSSSCG00000001934	0	0	0.546316	0
circRNA001269	7:68187939-68206209,+	ENSSSCG00000001942	0	0	0.364211	0.380127
circRNA001270	7:69490626-69496352,-	ENSSSCG00000001951	0	0	0	0.380127
circRNA001275	7:69674621-69682624,-	ENSSSCG00000001955	0	0	0	2.28119
circRNA001276	7:69682420-69693371,-	ENSSSCG00000001955	0	0	0.364211	0
circRNA001277	7:69814147-69860605,+	ENSSSCG00000001958	0	0	0.364211	0
circRNA001279	7:69842800-69846842,+	ENSSSCG00000001958	1.47387	0	0	0
circRNA001285	7:69874054-69882364,+	ENSSSCG00000001958	0	4.60257	0.364211	2.28119
circRNA001286	7:69878127-69878724,+	ENSSSCG00000001958	2.94774	0	0	0
circRNA001287	7:69878127-69882364,+	ENSSSCG00000001958	2.52671	0	0	0
circRNA001289	7:70033346-70038001,+	ENSSSCG00000001960	1.8949	0	0	1.52093
circRNA001293	7:73050147-73057496,+	ENSSSCG00000001970	0	0	0	0.570191
circRNA001303	7:73063994-73073314,+	ENSSSCG00000001970	0	0	0.364211	0.570191
circRNA001304	7:73063994-73081439,+	ENSSSCG00000001970	1.68438	0	0	0
circRNA001308	7:73066710-73096838,+	ENSSSCG00000001970	0	0	0	0.380127
circRNA001309	7:73081329-73086240,+	ENSSSCG00000001970	0	16.736	0.546316	0.570191
circRNA001310	7:73081329-73093908,+	ENSSSCG00000001970	0	0	0	1.14038
circRNA001311	7:73081329-73096838,+	ENSSSCG00000001970	0	6.06693	1.27474	0
circRNA001315	7:73092644-73111840,+	ENSSSCG00000001970	0	0	0.364211	0
circRNA001317	7:73100246-73111840,+	ENSSSCG00000001970	0	0	0.364211	0.570191
circRNA001319	7:73102327-73108194,+	ENSSSCG00000001970	0	0	0.364211	0
circRNA001321	7:73102327-73116048,+	ENSSSCG00000001970	0	0	0.546316	0
circRNA001331	7:73254172-73271089,+	ENSSSCG00000001971	0	0	0	0.570191
circRNA001337	7:73270654-73283935,+	ENSSSCG00000001971	0	0	0	0.760254
circRNA001341	7:73287697-73291470,+	ENSSSCG00000001971	0.631543	0	0	0
circRNA001345	7:73296505-73299428,+	ENSSSCG00000001971	0	0	0	0.760254
circRNA001347	7:73436270-73441040,-	ENSSSCG00000001973	0	0	0	0.570191
circRNA001353	7:74641880-74704888,+	ENSSSCG00000001975	0	0	0	0.380127
circRNA001356	7:80266701-80267078,+	ENSSSCG00000001991	0	0	1.45684	2.66131
circRNA001359	7:80406931-80408219,-	ENSSSCG00000002002	0	0	0	0.760254
circRNA001361	7:80408941-80409141,-	ENSSSCG00000002002	0	0	0.364211	0
circRNA001368	7:81111876-81113082,+	ENSSSCG00000002020	0.842325	0	0	1.71099
circRNA001369	7:80963948-80964232,-	ENSSSCG00000002021	0	0	0.364211	0
circRNA001370	7:80963957-80964232,-	ENSSSCG00000002021	0.631543	0	0	0
circRNA001371	7:80987116-80987268,+	ENSSSCG00000002023	0	0	0.364211	0
circRNA001385	7:81304154-81306374,+	ENSSSCG00000002034	0	3.55637	0	0
circRNA001387	7:81321797-81322293,+	ENSSSCG00000002034	0	0	0.364211	0
circRNA001389	7:81419270-81420452,-	ENSSSCG00000002039	0	0	0	0.380127
circRNA001390	7:81476767-81477601,-	ENSSSCG00000002042	0	0	0.546316	0
circRNA001393	7:83110903-83113193,+	ENSSSCG00000002127	0	0	3.82422	0
circRNA001394	7:83113832-83116642,+	ENSSSCG00000002127	0	0	0	0.570191
circRNA001397	7:83547777-83549194,+	ENSSSCG00000002142	0	0	0.364211	0.760254
circRNA001402	7:86335986-86338985,+	ENSSSCG00000002245	0	0	1.09263	0.380127
circRNA001414	7:92764520-92768684,-	ENSSSCG00000002263	1.26335	0	0	0
circRNA001415	7:92786013-92796047,-	ENSSSCG00000002263	0	0	0	1.14038
circRNA001416	7:91884278-91884525,-	ENSSSCG00000002266	0	0	0.364211	0
circRNA001418	7:91884278-91895327,-	ENSSSCG00000002266	0	0	2.54948	3.99218
circRNA001419	7:91884278-91926482,-	ENSSSCG00000002266	0	0	0.546316	0
circRNA001421	7:91890125-91895327,-	ENSSSCG00000002266	0	0	0	2.66131
circRNA001423	7:91890125-91902868,-	ENSSSCG00000002266	0	0	0.364211	0
circRNA001424	7:91892901-91895327,-	ENSSSCG00000002266	0	0	0.364211	0
circRNA001430	7:91902727-91926482,-	ENSSSCG00000002266	0	0	0.546316	0
circRNA001437	7:91912201-91926482,-	ENSSSCG00000002266	0	0	0.546316	1.14038
circRNA001439	7:91917855-91919110,-	ENSSSCG00000002266	4.8429	0	6.91971	5.89282
circRNA001441	7:91917855-91926482,-	ENSSSCG00000002266	0	11.0877	3.64211	4.9425
circRNA001444	7:91917855-91950519,-	ENSSSCG00000002266	1.26335	0	0.364211	0.570191
circRNA001447	7:91925253-91926482,-	ENSSSCG00000002266	0	0	0	0.760254
circRNA001452	7:91930062-91962447,-	ENSSSCG00000002266	0	0	0	0.380127
circRNA001454	7:91930062-91982115,-	ENSSSCG00000002266	0	8.78658	0.364211	0.950318
circRNA001456	7:91932957-91939138,-	ENSSSCG00000002266	0.842325	0	0	0
circRNA001463	7:91938949-91982115,-	ENSSSCG00000002266	0	0	1.27474	2.09112
circRNA001464	7:91949363-91950519,-	ENSSSCG00000002266	0	0	0.546316	0.760254
circRNA001465	7:91949363-91952828,-	ENSSSCG00000002266	0	0	0.728422	0
circRNA001466	7:91949363-91956101,-	ENSSSCG00000002266	0	0	0	0.380127
circRNA001470	7:91949363-91982115,-	ENSSSCG00000002266	0.631543	0	0.546316	0.570191
circRNA001474	7:91955976-91962447,-	ENSSSCG00000002266	0	0	0	0.380127
circRNA001479	7:91959136-91964590,-	ENSSSCG00000002266	0	0	0	1.14038
circRNA001480	7:91959136-91982115,-	ENSSSCG00000002266	2.52671	0	0.728422	0.950318
circRNA001481	7:91960802-91982115,-	ENSSSCG00000002266	0	0	0	1.33087
circRNA001483	7:91964456-91966849,-	ENSSSCG00000002266	0	0	1.63895	0
circRNA001484	7:91964456-91969641,-	ENSSSCG00000002266	0	0	4.18813	2.85138
circRNA001486	7:91964456-91982115,-	ENSSSCG00000002266	0	0	0	0.570191
circRNA001487	7:91966708-91969641,-	ENSSSCG00000002266	1.05284	0	1.45684	0.760254
circRNA001488	7:91966708-91977940,-	ENSSSCG00000002266	0	0	0	1.90106
circRNA001489	7:91966708-91982115,-	ENSSSCG00000002266	0	0	0.546316	0
circRNA001490	7:91969533-91977940,-	ENSSSCG00000002266	0	0	0	0.950318
circRNA001493	7:91976024-91982115,-	ENSSSCG00000002266	8.21166	14.2259	14.3857	24.9026
circRNA001499	7:94867448-94873632,+	ENSSSCG00000002269	0	0	0.364211	0.570191
circRNA001502	7:95007159-95016538,+	ENSSSCG00000002275	0	0	0	0.380127
circRNA001503	7:95175043-95181101,+	ENSSSCG00000002276	0.421029	0	0	0
circRNA001510	7:95991163-96009673,+	ENSSSCG00000002283	0	0	0.546316	0
circRNA001512	7:96009558-96080041,+	ENSSSCG00000002283	0	0	0	0.570191
circRNA001517	7:97005366-97058377,+	ENSSSCG00000002285	0	0	8.55866	6.27294
circRNA001518	7:97005366-97101356,+	ENSSSCG00000002285	1.47387	0	9.10497	4.37231
circRNA001519	7:97005366-97118937,+	ENSSSCG00000002285	0	0	1.27474	0.950318
circRNA001520	7:97005366-97127991,+	ENSSSCG00000002285	0	0	1.09263	0
circRNA001521	7:97005366-97140112,+	ENSSSCG00000002285	0	0	0.364211	0.570191
circRNA001522	7:97005366-97156735,+	ENSSSCG00000002285	0	10.0419	0	0
circRNA001527	7:97118844-97140112,+	ENSSSCG00000002285	0	0	0	0.380127
circRNA001528	7:97118844-97156735,+	ENSSSCG00000002285	0	0	0	0.380127
circRNA001532	7:97312227-97343426,+	ENSSSCG00000002287	0	0	0	0.380127
circRNA001534	7:97339116-97343426,+	ENSSSCG00000002287	0	0	0	0.760254
circRNA001538	7:97696949-97704983,-	ENSSSCG00000002295	0	0	0	0.760254
circRNA001539	7:97739663-97746028,-	ENSSSCG00000002296	0	0	0.910527	1.33087
circRNA001541	7:97833509-97834004,-	ENSSSCG00000002298	1.47387	0	1.27474	0.380127
circRNA001542	7:97848551-97849363,-	ENSSSCG00000002298	2.94774	0	0	0
circRNA001543	7:97854901-97855934,-	ENSSSCG00000002298	0	5.43929	0	0
circRNA001544	7:97854901-97858399,-	ENSSSCG00000002298	1.05284	0	0	0
circRNA001550	7:99226380-99240779,+	ENSSSCG00000002306	0	0	0	0.380127
circRNA001551	7:99254890-99255814,+	ENSSSCG00000002306	0	0	0.364211	0
circRNA001552	7:99573865-99574068,+	ENSSSCG00000002311	0	16.3179	0.364211	0
circRNA001556	7:100085511-100087357,-	ENSSSCG00000002315	0	0	0	0.380127
circRNA001558	7:100613624-100615876,+	ENSSSCG00000002328	0	0	0.364211	0
circRNA001560	7:100752532-100761638,+	ENSSSCG00000002330	0	0	1.45684	3.04144
circRNA001561	7:100772976-100778989,+	ENSSSCG00000002330	2.31619	0	0.364211	0
circRNA001563	7:100799294-100803845,+	ENSSSCG00000002330	0.842325	0	0.364211	0.380127
circRNA001564	7:100813126-100818500,+	ENSSSCG00000002330	0	0	0	1.33087
circRNA001570	7:101360846-101373946,+	ENSSSCG00000002332	0	0	0.364211	0.950318
circRNA001572	7:101389794-101390971,+	ENSSSCG00000002332	0	0	0	1.52093
circRNA001573	7:101389794-101396999,+	ENSSSCG00000002332	0	0	0	1.90106
circRNA001575	7:102114791-102115761,-	ENSSSCG00000002337	0	0	0.364211	0
circRNA001579	7:102134419-102140493,-	ENSSSCG00000002337	13.0546	22.3848	2.18527	3.2315
circRNA001581	7:102164941-102165873,-	ENSSSCG00000002337	0	0	0.364211	0
circRNA001584	7:102315540-102331206,+	ENSSSCG00000002340	0	0	0	0.380127
circRNA001585	7:102315540-102347031,+	ENSSSCG00000002340	1.47387	0	0	0
circRNA001588	7:102337720-102350409,+	ENSSSCG00000002340	0	7.94986	0	1.71099
circRNA001591	7:102696375-102720215,-	ENSSSCG00000002347	4.00057	0	0.910527	0
circRNA001592	7:102964570-102973300,+	ENSSSCG00000002352	0	0	0	0.570191
circRNA001593	7:102964570-102977175,+	ENSSSCG00000002352	3.79006	0	0	0
circRNA001594	7:103002841-103003342,-	ENSSSCG00000002353	0	0	0.546316	0
circRNA001596	7:103037109-103043524,-	ENSSSCG00000002355	0	0	0.546316	0
circRNA001598	7:103128060-103130962,-	ENSSSCG00000002357	0	0	0	0.760254
circRNA001607	7:103941331-103949780,+	ENSSSCG00000002374	0	0	0	1.33087
circRNA001608	7:103942927-103949780,+	ENSSSCG00000002374	2.94774	0	0	0
circRNA001616	7:104156048-104163058,-	ENSSSCG00000002381	0	0	0	0.380127
circRNA001618	7:104294978-104295384,+	ENSSSCG00000002383	0	0	0.364211	0
circRNA001622	7:105383270-105408581,+	ENSSSCG00000002387	0	0	0	2.47125
circRNA001624	7:105387842-105396660,+	ENSSSCG00000002387	1.68438	0	0	0
circRNA001625	7:105387842-105408581,+	ENSSSCG00000002387	0	0	0.728422	0.760254
circRNA001627	7:105392982-105408581,+	ENSSSCG00000002387	0	0	1.82105	0
circRNA001632	7:106683291-106684741,+	ENSSSCG00000002404	0	10.8786	0	0
circRNA001640	7:110410028-110416129,-	ENSSSCG00000002414	0	0	0.364211	0
circRNA001642	7:110438621-110440472,-	ENSSSCG00000002414	0	0	0.364211	0
circRNA001648	7:116970558-116975944,+	ENSSSCG00000002426	0.842325	0	0	0
circRNA001650	7:116973935-116975944,+	ENSSSCG00000002426	0	0	1.09263	0.570191
circRNA001651	7:116973935-116994106,+	ENSSSCG00000002426	0	7.11274	3.09579	3.80169
circRNA001653	7:116973935-117004866,+	ENSSSCG00000002426	11.7912	0	4.91655	9.69493
circRNA001656	7:117047644-117053289,-	ENSSSCG00000002427	0	0	0	0.570191
circRNA001657	7:117047644-117061723,-	ENSSSCG00000002427	1.47387	0	0	0
circRNA001658	7:117053210-117110099,-	ENSSSCG00000002427	0	0	0	0.380127
circRNA001667	7:117841709-117842266,-	ENSSSCG00000002429	2.73722	2.51056	0.728422	0
circRNA001669	7:118627502-118629374,-	ENSSSCG00000002434	0	0	0	0.380127
circRNA001675	7:118961845-118978888,-	ENSSSCG00000002436	0	0	1.09263	0
circRNA001679	7:119666592-119674908,-	ENSSSCG00000002441	0	0	0.364211	0
circRNA001680	7:119667662-119677846,-	ENSSSCG00000002441	0	10.2509	0	0
circRNA001682	7:119682038-119690020,-	ENSSSCG00000002441	0	0	1.27474	1.71099
circRNA001683	7:119957966-119963609,-	ENSSSCG00000002443	1.47387	0	0	0
circRNA001684	7:119961616-119966852,-	ENSSSCG00000002443	3.79006	0	0	0
circRNA001695	7:120232942-120239421,-	ENSSSCG00000002446	0	0	0.364211	0
circRNA001697	7:120243450-120247070,-	ENSSSCG00000002446	0	0	0	0.760254
circRNA001701	7:120267986-120269187,-	ENSSSCG00000002447	0	0	0	0.380127
circRNA001705	7:120856217-120857836,+	ENSSSCG00000002455	0	0	0.546316	0.950318
circRNA001708	7:120858509-120868427,+	ENSSSCG00000002455	0	0	0	0.950318
circRNA001709	7:120861234-120865459,+	ENSSSCG00000002455	0	0	0	0.950318
circRNA001710	7:120861234-120868427,+	ENSSSCG00000002455	0	0	0	0.570191
circRNA001711	7:120861234-120878178,+	ENSSSCG00000002455	0	0	0	0.380127
circRNA001713	7:121179726-121181497,+	ENSSSCG00000002460	2.52671	0	1.45684	1.33087
circRNA001715	7:121210816-121217710,-	ENSSSCG00000002461	1.68438	0	0	0
circRNA001718	7:121217520-121224532,-	ENSSSCG00000002461	0	0	0	0.380127
circRNA001720	7:121219838-121232103,-	ENSSSCG00000002461	1.47387	0	0	0
circRNA001721	7:121224371-121232103,-	ENSSSCG00000002461	0.421029	0	0	0.760254
circRNA001723	7:121229265-121260967,-	ENSSSCG00000002461	0	0	0	0.570191
circRNA001725	7:121258975-121260967,-	ENSSSCG00000002461	5.68496	0	2.73158	9.12474
circRNA001726	7:122481754-122521658,+	ENSSSCG00000002474	2.52671	0	0	0
circRNA001731	7:122521588-122529150,+	ENSSSCG00000002474	0	0	0	0.380127
circRNA001732	7:122522391-122524276,+	ENSSSCG00000002474	0	0	1.27474	0
circRNA001743	7:123923453-123923801,-	ENSSSCG00000002495	0	0	3.2779	1.14038
circRNA001755	7:124821064-124828826,-	ENSSSCG00000002502	1.26335	0	0	0.380127
circRNA001760	7:124952564-124954675,+	ENSSSCG00000002505	4.00057	0	6.5555	7.79387
circRNA001765	7:124952564-124977939,+	ENSSSCG00000002505	0	0	0	0.380127
circRNA001766	7:124952564-124983041,+	ENSSSCG00000002505	0	0	0.364211	0
circRNA001767	7:124952564-124987581,+	ENSSSCG00000002505	2.94774	0	0	1.14038
circRNA001768	7:124956433-124957057,+	ENSSSCG00000002505	0	4.18401	0	0.760254
circRNA001769	7:124977817-124983041,+	ENSSSCG00000002505	0	0	0.910527	1.14038
circRNA001770	7:124977817-124987581,+	ENSSSCG00000002505	0	18.619	6.19129	7.60381
circRNA001771	7:124977817-124994717,+	ENSSSCG00000002505	0	0	3.64211	7.60381
circRNA001772	7:124987072-124987581,+	ENSSSCG00000002505	0	0	0.546316	0
circRNA001774	7:125280802-125289007,+	ENSSSCG00000002506	0	0	0.364211	0
circRNA001778	7:128024096-128030076,-	ENSSSCG00000002508	0	0	0	1.14038
circRNA001779	7:128024096-128033636,-	ENSSSCG00000002508	26.9515	50.4176	23.6728	27.7539
circRNA001780	7:128025161-128030076,-	ENSSSCG00000002508	0	0	0.546316	0
circRNA001781	7:128688066-128689861,-	ENSSSCG00000002516	0	0	0.546316	0
circRNA001782	7:128689752-128691194,-	ENSSSCG00000002516	0	0	2.18527	1.90106
circRNA001783	7:128846359-128849189,-	ENSSSCG00000002523	0	0	0	0.380127
circRNA001785	7:128851815-128852241,-	ENSSSCG00000002523	0	0	0	0.570191
circRNA001786	7:128851815-128853715,-	ENSSSCG00000002523	0	0	0	11.5956
circRNA001790	7:128873316-128881993,-	ENSSSCG00000002523	0	0	1.09263	0
circRNA001791	7:128927159-128960887,-	ENSSSCG00000002525	1.68438	0	0	0
circRNA001792	7:128933810-128960887,-	ENSSSCG00000002525	0	0	0	0.380127
circRNA001793	7:129071852-129087067,-	ENSSSCG00000002526	0	0	0	0.760254
circRNA001794	7:129340999-129341925,+	ENSSSCG00000002528	1.47387	0	0.728422	0
circRNA001797	7:129860023-129893327,-	ENSSSCG00000002540	0	0	0	0.380127
circRNA001804	7:130871864-130883093,-	ENSSSCG00000002547	0	0	0	0.380127
circRNA001805	7:130879956-130880371,-	ENSSSCG00000002547	1.47387	0	6.37339	2.66131
circRNA001806	7:130879956-130883781,-	ENSSSCG00000002547	0	0	0.728422	4.56237
circRNA001808	7:130882991-130883781,-	ENSSSCG00000002547	0	0	0.364211	0
circRNA001809	7:130882991-130887622,-	ENSSSCG00000002547	0	0	1.82105	2.47125
circRNA001812	7:131211945-131213966,+	ENSSSCG00000002558	0	0	0	0.570191
circRNA001815	7:134413443-134424293,-	ENSSSCG00000002628	0	0	0.364211	0
circRNA001816	7:134415740-134416052,-	ENSSSCG00000002628	0	0	1.82105	0.570191
circRNA001817	7:134420427-134423008,-	ENSSSCG00000002628	0	0	0	0.570191
circRNA001819	7:134473584-134477567,+	ENSSSCG00000002629	0	0	0.364211	0
circRNA001827	6:4217612-4218077,-	ENSSSCG00000002667	0	0	0	0.380127
circRNA001828	6:4219099-4219948,-	ENSSSCG00000002667	6.10625	7.94986	8.19445	4.37231
circRNA001829	6:4228836-4232617,-	ENSSSCG00000002667	0	0	0	1.33087
circRNA001830	6:5072428-5075088,+	ENSSSCG00000002681	0	0	0.364211	0
circRNA001836	6:7482062-7485302,-	ENSSSCG00000002690	0	0	0.364211	0.760254
circRNA001839	6:10030266-10034973,-	ENSSSCG00000002696	0	0	0.728422	0.950318
circRNA001840	6:11903067-11904235,+	ENSSSCG00000002704	0	0	0.546316	0
circRNA001841	6:11922508-11926858,+	ENSSSCG00000002706	0	0	0.364211	0
circRNA001842	6:11926254-11926858,+	ENSSSCG00000002706	6.52728	0	0	1.14038
circRNA001843	6:12903110-12903488,-	ENSSSCG00000002715	0	0	0	0.760254
circRNA001847	6:13369363-13371247,-	ENSSSCG00000002723	0	0	0	1.14038
circRNA001858	6:14369021-14377132,-	ENSSSCG00000002740	0	0	0.364211	0
circRNA001859	6:14474408-14476162,-	ENSSSCG00000002743	0	0	0	0.380127
circRNA001862	6:16187290-16188947,-	ENSSSCG00000002753	0	0	0	1.14038
circRNA001863	6:16187290-16190862,-	ENSSSCG00000002753	0	0	0.546316	0
circRNA001866	6:16266270-16284783,-	ENSSSCG00000002755	0	0	0	0.950318
circRNA001867	6:16266270-16303134,-	ENSSSCG00000002755	0	0	0.546316	0.570191
circRNA001868	6:16272131-16303134,-	ENSSSCG00000002755	0	0	0	0.570191
circRNA001870	6:16298299-16300646,-	ENSSSCG00000002755	0	0	0	2.09112
circRNA001871	6:16298299-16303134,-	ENSSSCG00000002755	2.31619	0	2.73158	5.32263
circRNA001872	6:16298299-16309258,-	ENSSSCG00000002755	0	9.83239	0	0.950318
circRNA001873	6:16298299-16325581,-	ENSSSCG00000002755	2.31619	0	0.364211	0
circRNA001874	6:16300455-16303134,-	ENSSSCG00000002755	0	0	0	0.570191
circRNA001877	6:16567248-16574125,+	ENSSSCG00000002762	0	0	0.364211	0
circRNA001878	6:26111120-26112554,+	ENSSSCG00000002763	0	0	0.728422	0
circRNA001880	6:25267893-25302587,+	ENSSSCG00000002779	0	0	0	0.380127
circRNA001883	6:25124750-25125060,+	ENSSSCG00000002787	0	0	0	0.570191
circRNA001885	6:23732486-23798843,-	ENSSSCG00000002795	0	0	0	0.380127
circRNA001886	6:23746829-23750717,-	ENSSSCG00000002795	0	0	0	0.570191
circRNA001887	6:23746829-23753262,-	ENSSSCG00000002795	0	0	0	0.380127
circRNA001888	6:23746829-23762302,-	ENSSSCG00000002795	0	0	0.364211	0
circRNA001890	6:18412778-18421604,+	ENSSSCG00000002799	0	0	0	0.380127
circRNA001892	6:18418913-18424962,+	ENSSSCG00000002799	0	0	0.364211	0
circRNA001895	6:18424721-18428157,+	ENSSSCG00000002799	0.631543	0	1.63895	0.570191
circRNA001898	6:18426872-18428157,+	ENSSSCG00000002799	0.631543	3.34729	0	1.33087
circRNA001899	6:18436856-18441054,+	ENSSSCG00000002799	0	0	0.364211	0
circRNA001903	6:18444400-18445181,+	ENSSSCG00000002799	0	0	0.364211	0
circRNA001907	6:18449173-18463615,+	ENSSSCG00000002799	0	0	0.364211	0
circRNA001910	6:18464131-18466706,+	ENSSSCG00000002799	1.26335	0	0	0
circRNA001913	6:18329979-18330465,+	ENSSSCG00000002800	0	0	0	0.380127
circRNA001916	6:17951618-17955567,+	ENSSSCG00000002806	0	0	0	1.52093
circRNA001918	6:17199324-17203705,+	ENSSSCG00000002819	0	0	0.364211	0
circRNA001924	6:31456595-31463579,+	ENSSSCG00000002841	2.31619	0	0.728422	1.14038
circRNA001934	6:32239125-32383981,-	ENSSSCG00000002844	0	5.02074	0	0.570191
circRNA001936	6:32344545-32383981,-	ENSSSCG00000002844	3.36903	0	2.91369	5.13256
circRNA001937	6:32369033-32383981,-	ENSSSCG00000002844	0	4.3931	3.64211	1.52093
circRNA001942	6:38057665-38058652,+	ENSSSCG00000002857	0	0	0	0.380127
circRNA001944	6:38027369-38134896,-	ENSSSCG00000002859	0	0	1.27474	0
circRNA001945	6:38146992-38149056,-	ENSSSCG00000002859	0	0	1.27474	0
circRNA001947	6:38460955-38466286,+	ENSSSCG00000002865	0	0	0	0.570191
circRNA001948	6:39320646-39321162,-	ENSSSCG00000002869	0	0	0.364211	0.760254
circRNA001950	6:39418244-39419523,+	ENSSSCG00000002872	0	0	0	0.950318
circRNA001953	6:39451628-39453427,+	ENSSSCG00000002872	0	0	0	0.570191
circRNA001956	6:39464091-39466299,+	ENSSSCG00000002872	0	0	0	0.760254
circRNA001959	6:39470581-39472285,+	ENSSSCG00000002872	0	0	1.09263	0
circRNA001961	6:39471798-39472185,+	ENSSSCG00000002872	6.52728	6.4851	14.2036	6.84356
circRNA001965	6:39555555-39563150,+	ENSSSCG00000002876	0	0	0	0.950318
circRNA001967	6:40005154-40007244,+	ENSSSCG00000002879	0	0	0	0.380127
circRNA001969	6:40797701-40798115,-	ENSSSCG00000002921	0	0	0.364211	0
circRNA001972	6:40865445-40870115,+	ENSSSCG00000002923	0	0	0.910527	0
circRNA001973	6:41162845-41183469,-	ENSSSCG00000002932	0	0	0	0.760254
circRNA001974	6:41561593-41562084,-	ENSSSCG00000002935	0	0	0.546316	0
circRNA001975	6:41561593-41576604,-	ENSSSCG00000002935	0	0	3.09579	0
circRNA001981	6:42727655-42727817,-	ENSSSCG00000002952	0	0	11.2902	4.37231
circRNA001982	6:42727656-42727817,-	ENSSSCG00000002952	0	0	8.55866	1.52093
circRNA001984	6:42817784-42818074,+	ENSSSCG00000002959	0	0	0.910527	0
circRNA002001	6:44335684-44337036,-	ENSSSCG00000002989	0	0	0	0.380127
circRNA002003	6:44350219-44351919,-	ENSSSCG00000002989	0	0	0.546316	0
circRNA002010	6:45614073-45615516,+	ENSSSCG00000003035	0	0	0	0.380127
circRNA002011	6:45904032-45905001,+	ENSSSCG00000003039	0	0	0.364211	0
circRNA002016	6:46159159-46159495,-	ENSSSCG00000003055	0	8.36802	0	0
circRNA002017	6:46160892-46161877,-	ENSSSCG00000003055	0	0	1.09263	0
circRNA002018	6:46236493-46237044,+	ENSSSCG00000003063	0	0	0.910527	0.950318
circRNA002019	6:46236676-46236887,+	ENSSSCG00000003063	1.05284	0	0	0
circRNA002024	6:47227821-47232626,+	ENSSSCG00000003090	0	0	0.728422	0.760254
circRNA002026	6:47420463-47422794,-	ENSSSCG00000003093	0	0	0	0.380127
circRNA002028	6:47427852-47431756,-	ENSSSCG00000003093	2.10568	0	0	0
circRNA002035	6:48285308-48286299,-	ENSSSCG00000003110	0.631543	0	0	0
circRNA002037	6:48344624-48366827,+	ENSSSCG00000003111	1.47387	0	3.2779	2.85138
circRNA002041	6:48351536-48356123,+	ENSSSCG00000003111	4.8429	3.34729	0.910527	3.42157
circRNA002042	6:48351536-48366827,+	ENSSSCG00000003111	11.5807	0	4.37023	4.9425
circRNA002043	6:48351536-48389725,+	ENSSSCG00000003111	0	0	2.00316	0
circRNA002044	6:48354132-48366827,+	ENSSSCG00000003111	0	0	0	1.14038
circRNA002048	6:48763766-48763974,+	ENSSSCG00000003120	0	0	0.546316	0
circRNA002051	6:49545215-49546595,-	ENSSSCG00000003136	0.421029	0	0	0
circRNA002054	6:50127661-50128210,-	ENSSSCG00000003150	0	0	0	2.09112
circRNA002057	6:50082426-50084940,+	ENSSSCG00000003154	0	0	0.910527	0.760254
circRNA002058	6:50083451-50083987,+	ENSSSCG00000003154	0	0	5.28076	3.61163
circRNA002059	6:50089242-50089841,+	ENSSSCG00000003154	0	0	0.364211	0
circRNA002061	6:50296618-50296860,+	ENSSSCG00000003166	0	0	0.364211	0
circRNA002064	6:50628649-50629645,+	ENSSSCG00000003193	0	0	0.546316	0
circRNA002067	6:50530896-50531586,+	ENSSSCG00000003199	4.63239	1.0462	18.0278	10.8353
circRNA002070	6:50779919-50782049,-	ENSSSCG00000003204	0	0	1.45684	0
circRNA002071	6:50779919-50787793,-	ENSSSCG00000003204	0	0	0.364211	0
circRNA002075	6:51088599-51088901,+	ENSSSCG00000003211	0	0	0	0.570191
circRNA002077	6:51137447-51138019,+	ENSSSCG00000003218	0	2.71965	0	0
circRNA002093	6:53232114-53237314,+	ENSSSCG00000003264	0	0	0.364211	0
circRNA002094	6:54408322-54408545,+	ENSSSCG00000003301	0	0	1.45684	0
circRNA002095	6:54408322-54408547,+	ENSSSCG00000003301	5.68496	23.8492	6.91971	2.85138
circRNA002096	6:54408322-54408548,+	ENSSSCG00000003301	0	0	0.546316	0
circRNA002098	6:57980043-57980770,+	ENSSSCG00000003334	0	5.85785	1.82105	0
circRNA002102	6:58121006-58121171,-	ENSSSCG00000003342	0	0	0.364211	0
circRNA002103	6:58224128-58224898,+	ENSSSCG00000003350	0	0	0	0.760254
circRNA002108	6:62149995-62156758,-	ENSSSCG00000003377	0	0	0.364211	0
circRNA002112	6:62370729-62371821,+	ENSSSCG00000003384	0	0	0.910527	2.09112
circRNA002114	6:64037888-64038056,-	ENSSSCG00000003395	0	0	0	0.380127
circRNA002116	6:64014021-64014828,+	ENSSSCG00000003396	0	0	0.364211	0.380127
circRNA002121	6:64288024-64290820,-	ENSSSCG00000003398	0	2.92873	1.82105	0.380127
circRNA002122	6:64288024-64292459,-	ENSSSCG00000003398	0	0	0.546316	0
circRNA002125	6:64468580-64479121,+	ENSSSCG00000003401	0	0	0.364211	0
circRNA002126	6:64468580-64500813,+	ENSSSCG00000003401	0	0	0.364211	0
circRNA002127	6:64478264-64479121,+	ENSSSCG00000003401	0.631543	0	0.910527	0
circRNA002129	6:64478264-64494687,+	ENSSSCG00000003401	0	0	0	0.950318
circRNA002135	6:64511469-64519841,+	ENSSSCG00000003401	0	0	2.18527	0
circRNA002137	6:64542086-64546864,+	ENSSSCG00000003401	0	0	0	0.760254
circRNA002142	6:64563547-64573433,+	ENSSSCG00000003401	0	0	0	0.380127
circRNA002149	6:65209555-65211387,-	ENSSSCG00000003413	0	0	0	0.760254
circRNA002152	6:65269144-65276440,-	ENSSSCG00000003413	0	2.51056	0	0
circRNA002156	6:65670010-65670610,+	ENSSSCG00000003421	0	0	4.18813	1.52093
circRNA002157	6:65815751-65817930,+	ENSSSCG00000003429	0	0	0.364211	0
circRNA002162	6:66425342-66429032,+	ENSSSCG00000003438	0	0	0.910527	0
circRNA002166	6:66465511-66504324,+	ENSSSCG00000003438	0	0	0	0.380127
circRNA002171	6:66688636-66694384,-	ENSSSCG00000003439	0	0	2.73158	2.85138
circRNA002172	6:68953847-68959783,-	ENSSSCG00000003455	0	0	0.546316	0
circRNA002173	6:69091521-69092428,-	ENSSSCG00000003460	0	0	0.546316	0
circRNA002176	6:69145547-69162481,-	ENSSSCG00000003462	0	0	0.364211	0
circRNA002177	6:69151419-69154853,-	ENSSSCG00000003462	0	0	0.546316	1.52093
circRNA002178	6:69151419-69159515,-	ENSSSCG00000003462	0	0	0.364211	0
circRNA002180	6:69151419-69166153,-	ENSSSCG00000003462	0.842325	0	0	2.09112
circRNA002182	6:69159388-69166153,-	ENSSSCG00000003462	0.842325	0	0.364211	0
circRNA002186	6:69244119-69246608,-	ENSSSCG00000003464	2.94774	0	1.45684	0
circRNA002190	6:69367918-69368568,-	ENSSSCG00000003465	0	0	0	0.380127
circRNA002196	6:71569929-71571984,-	ENSSSCG00000003488	0	0	0	1.52093
circRNA002201	6:73120659-73123828,+	ENSSSCG00000003506	0	0	1.09263	0
circRNA002203	6:73225178-73235640,-	ENSSSCG00000003511	0	0	0	0.950318
circRNA002204	6:73225178-73237691,-	ENSSSCG00000003511	0	0	0	0.760254
circRNA002206	6:73230519-73237691,-	ENSSSCG00000003511	0	0	0	0.570191
circRNA002207	6:73234580-73237691,-	ENSSSCG00000003511	0	6.06693	0.728422	0
circRNA002212	6:73282195-73293946,-	ENSSSCG00000003512	0	0	0	0.760254
circRNA002213	6:73284405-73304281,-	ENSSSCG00000003512	0	0	0	0.570191
circRNA002219	6:73665691-73666682,-	ENSSSCG00000003513	0	0	0	0.570191
circRNA002223	6:73679330-73687667,-	ENSSSCG00000003513	3.57955	0	0	0
circRNA002225	6:73931071-73932260,+	ENSSSCG00000003514	0	0	2.36737	2.28119
circRNA002229	6:74096529-74110479,+	ENSSSCG00000003520	0	5.43929	0.910527	0
circRNA002230	6:74828914-74830567,+	ENSSSCG00000003527	0	0	1.27474	1.52093
circRNA002231	6:74972540-74980836,+	ENSSSCG00000003531	0	0	0.546316	0
circRNA002238	6:74992304-75062084,+	ENSSSCG00000003531	0	0	0	0.950318
circRNA002239	6:75060282-75062084,+	ENSSSCG00000003531	0.631543	0	3.09579	4.9425
circRNA002240	6:75069323-75069735,+	ENSSSCG00000003531	0	0	0	0.380127
circRNA002242	6:77945527-77947307,-	ENSSSCG00000003569	0	0	0	0.950318
circRNA002244	6:78642663-78652337,-	ENSSSCG00000003580	0	0	0.910527	1.14038
circRNA002245	6:78655584-78664274,-	ENSSSCG00000003580	0	0	0	0.380127
circRNA002246	6:78667018-78675602,-	ENSSSCG00000003580	0	0	0.546316	0
circRNA002254	6:79863285-79874911,+	ENSSSCG00000003586	0	0	0	0.760254
circRNA002255	6:79953813-79958558,-	ENSSSCG00000003588	0	0	0.364211	0
circRNA002256	6:81192651-81196936,+	ENSSSCG00000003591	0	0	0.546316	0
circRNA002257	6:81212688-81214438,+	ENSSSCG00000003591	0	0	0.364211	0
circRNA002259	6:81212688-81223815,+	ENSSSCG00000003591	0	0	0	0.380127
circRNA002261	6:81570021-81580900,-	ENSSSCG00000003596	0	0	0	1.71099
circRNA002262	6:81578550-81580900,-	ENSSSCG00000003596	0	0	0.728422	0
circRNA002263	6:81956137-81956936,+	ENSSSCG00000003604	0	0	0	1.14038
circRNA002266	6:82731407-82731772,+	ENSSSCG00000003612	0	5.23021	0	0
circRNA002267	6:82731407-82735822,+	ENSSSCG00000003612	0	0	0	0.950318
circRNA002276	6:85027837-85037351,-	ENSSSCG00000003627	9.68553	0	24.2191	27.944
circRNA002277	6:85031742-85043893,-	ENSSSCG00000003627	0	0	0	0.570191
circRNA002278	6:85033032-85037351,-	ENSSSCG00000003627	0	0	1.63895	0
circRNA002282	6:85037206-85043893,-	ENSSSCG00000003627	0	0	0.728422	0
circRNA002284	6:85042121-85043893,-	ENSSSCG00000003627	1.05284	0	0.364211	0.570191
circRNA002288	6:85062797-85065591,-	ENSSSCG00000003627	0	7.94986	0.364211	0.760254
circRNA002291	GL895583.1:29146-36063,-	ENSSSCG00000003628	0.631543	0	0	0
circRNA002293	6:85261798-85284732,+	ENSSSCG00000003629	0	0	0	0.570191
circRNA002294	6:85261798-85292883,+	ENSSSCG00000003629	0	0	0.364211	0
circRNA002295	6:85269338-85273122,+	ENSSSCG00000003629	0	0	0	0.950318
circRNA002297	6:85269338-85284732,+	ENSSSCG00000003629	0	0	0	0.760254
circRNA002303	6:85341892-85342284,+	ENSSSCG00000003630	0	0	0.364211	0
circRNA002304	6:85637595-85638553,-	ENSSSCG00000003637	0	0	0	0.760254
circRNA002305	6:85639740-85640353,-	ENSSSCG00000003637	0	0	1.63895	0.570191
circRNA002312	6:88173911-88196465,+	ENSSSCG00000003654	0	0	0	1.71099
circRNA002318	6:88253943-88257261,+	ENSSSCG00000003654	0	0	0	0.380127
circRNA002319	6:88253943-88260029,+	ENSSSCG00000003654	1.05284	0	0	0
circRNA002321	6:88253943-88264397,+	ENSSSCG00000003654	1.26335	10.6695	3.82422	3.61163
circRNA002322	6:88253943-88283039,+	ENSSSCG00000003654	0	4.81165	0	0
circRNA002324	6:88257153-88264397,+	ENSSSCG00000003654	0	0	0.364211	1.33087
circRNA002326	6:88268085-88279235,+	ENSSSCG00000003654	0	0	0	1.14038
circRNA002329	6:88281455-88352292,+	ENSSSCG00000003654	0	0	0.546316	0
circRNA002330	6:88284255-88290327,+	ENSSSCG00000003654	0	0	0.546316	0.570191
circRNA002337	6:88343001-88351020,+	ENSSSCG00000003654	0	0	2.54948	1.33087
circRNA002338	6:88343001-88354325,+	ENSSSCG00000003654	0	0	0.364211	0
circRNA002339	6:88344355-88351020,+	ENSSSCG00000003654	0	0	0.364211	1.14038
circRNA002341	6:88350181-88397584,+	ENSSSCG00000003654	0	0	0	0.380127
circRNA002343	6:88356873-88361287,+	ENSSSCG00000003654	0	0	0	1.33087
circRNA002345	6:88368154-88372686,+	ENSSSCG00000003654	0	0	0	0.380127
circRNA002347	6:88373922-88382097,+	ENSSSCG00000003654	0	0	0.364211	1.14038
circRNA002348	6:88384554-88389783,+	ENSSSCG00000003654	0	0	0	0.950318
circRNA002353	6:88476535-88480409,-	ENSSSCG00000003660	0	0	0	0.570191
circRNA002355	6:88477641-88480409,-	ENSSSCG00000003660	0	0	0.546316	0
circRNA002358	6:88784566-88793100,-	ENSSSCG00000003667	0	7.32222	0.364211	0
circRNA002359	6:88789117-88797787,-	ENSSSCG00000003667	0.842325	0	1.27474	0.380127
circRNA002360	6:88792954-88797787,-	ENSSSCG00000003667	0	0	0	1.14038
circRNA002366	6:89203606-89216201,-	ENSSSCG00000003670	0	2.92873	0	0
circRNA002368	6:89936039-89940373,-	ENSSSCG00000003673	0	0	0	0.570191
circRNA002374	6:91829523-91919964,+	ENSSSCG00000003679	0	0	0.364211	0
circRNA002375	6:91839898-91840949,+	ENSSSCG00000003679	0	0	0.364211	0
circRNA002376	6:91839898-91919964,+	ENSSSCG00000003679	0	0	0	0.380127
circRNA002377	6:91918115-91919964,+	ENSSSCG00000003679	4.63239	15.4812	3.64211	9.885
circRNA002379	6:91868361-91885592,-	ENSSSCG00000003680	0	0	0.364211	1.14038
circRNA002381	6:91875092-91877019,-	ENSSSCG00000003680	0	0	0	1.71099
circRNA002384	6:92037394-92039424,-	ENSSSCG00000003682	0	0	0.364211	0
circRNA002388	6:92050673-92055373,-	ENSSSCG00000003682	3.36903	0	0	0
circRNA002389	6:92078906-92092664,-	ENSSSCG00000003682	0	0	0	0.570191
circRNA002390	6:92078906-92097655,-	ENSSSCG00000003682	0	0	2.73158	2.85138
circRNA002392	6:92078906-92111445,-	ENSSSCG00000003682	0	0	2.18527	0.760254
circRNA002394	6:92090649-92097655,-	ENSSSCG00000003682	0	0	0	0.380127
circRNA002395	6:92090649-92102784,-	ENSSSCG00000003682	0	0	0.910527	0
circRNA002396	6:92090649-92111445,-	ENSSSCG00000003682	2.10568	0	0.728422	3.42157
circRNA002400	6:92170080-92179625,-	ENSSSCG00000003683	10.1068	31.3805	11.2902	8.93426
circRNA002401	6:92172006-92179625,-	ENSSSCG00000003683	1.68438	0	0.364211	2.66131
circRNA002402	6:92177329-92179625,-	ENSSSCG00000003683	0.631543	0	1.09263	0
circRNA002403	6:92433832-92436806,-	ENSSSCG00000003684	0	0	0	0.570191
circRNA002404	6:93665971-93677523,-	ENSSSCG00000003686	0	0.836725	0	0
circRNA002405	6:93673916-93677523,-	ENSSSCG00000003686	0	0	0	0.380127
circRNA002406	6:93673916-93707045,-	ENSSSCG00000003686	0.421029	0	0	0
circRNA002407	6:93677440-93696282,-	ENSSSCG00000003686	0	0	0	0.760254
circRNA002408	6:93696197-93725959,-	ENSSSCG00000003686	0	3.97493	0	0
circRNA002409	6:93706952-93725959,-	ENSSSCG00000003686	0	0	1.45684	0.380127
circRNA002410	6:93718109-93725959,-	ENSSSCG00000003686	0	0	0.910527	0.570191
circRNA002431	6:99084195-99155163,+	ENSSSCG00000003699	0	0	0.364211	0
circRNA002433	6:99121856-99155163,+	ENSSSCG00000003699	0	0	0	0.760254
circRNA002434	6:99131707-99155163,+	ENSSSCG00000003699	0	0	0	0.380127
circRNA002435	6:99190171-99192507,+	ENSSSCG00000003699	1.47387	0	1.63895	0.570191
circRNA002437	6:99212304-99243627,-	ENSSSCG00000003700	1.8949	0	0.546316	0
circRNA002438	6:99212304-99259476,-	ENSSSCG00000003700	0	0	0	0.760254
circRNA002439	6:99216721-99243627,-	ENSSSCG00000003700	0	0	0	0.760254
circRNA002443	6:99236963-99243627,-	ENSSSCG00000003700	0	0	0.546316	0.760254
circRNA002444	6:99236963-99259476,-	ENSSSCG00000003700	0	0	0	0.760254
circRNA002449	6:99765859-99771031,+	ENSSSCG00000003702	0	0	0.910527	0.380127
circRNA002450	6:99769670-99771031,+	ENSSSCG00000003702	0	0	2.36737	1.71099
circRNA002456	6:101014810-101029687,-	ENSSSCG00000003707	0	0	0.546316	0
circRNA002458	6:101028600-101028850,-	ENSSSCG00000003707	0	0	0.364211	0
circRNA002463	6:101573995-101586767,+	ENSSSCG00000003710	0	0	0.910527	0
circRNA002471	6:101724149-101804423,-	ENSSSCG00000003712	0	0	0.546316	0.570191
circRNA002472	6:101745125-101804423,-	ENSSSCG00000003712	0	0	0.364211	0
circRNA002473	6:101779795-101804423,-	ENSSSCG00000003712	0	0	1.27474	0
circRNA002474	6:101794656-101804423,-	ENSSSCG00000003712	0	0	0.364211	0
circRNA002476	6:103686781-103695506,-	ENSSSCG00000003716	2.31619	0	0.728422	0
circRNA002479	6:103690732-103695506,-	ENSSSCG00000003716	0	0	0.364211	0
circRNA002480	6:103690732-103720331,-	ENSSSCG00000003716	0	0	0	0.380127
circRNA002483	6:103695338-103720331,-	ENSSSCG00000003716	0	11.2968	0	0
circRNA002485	6:103715571-103720331,-	ENSSSCG00000003716	1.26335	16.1084	3.09579	6.46343
circRNA002486	6:103715571-103741524,-	ENSSSCG00000003716	0	17.5732	3.82422	11.2154
circRNA002487	6:103828535-103854303,+	ENSSSCG00000003718	10.9489	2.71965	7.64813	9.50487
circRNA002489	6:103828535-103894165,+	ENSSSCG00000003718	0	0	0.364211	0
circRNA002491	6:103828535-103911899,+	ENSSSCG00000003718	0	0	0.546316	0
circRNA002494	6:105317506-105328769,-	ENSSSCG00000003722	0	4.81165	0.364211	0.380127
circRNA002499	6:108531837-108540422,+	ENSSSCG00000003729	0	0	0.546316	0
circRNA002501	6:108611406-108614701,+	ENSSSCG00000003730	0.421029	2.92873	3.64211	5.70275
circRNA002502	6:108611406-108625994,+	ENSSSCG00000003730	2.10568	0	0	0
circRNA002512	6:113681717-113682391,+	ENSSSCG00000003747	9.05399	0	2.18527	1.52093
circRNA002515	6:113695690-113762635,+	ENSSSCG00000003747	0	0	0.728422	1.52093
circRNA002518	6:117964765-118002967,+	ENSSSCG00000003749	0	0	0.728422	0
circRNA002526	6:119320976-119321733,+	ENSSSCG00000003756	0	0	0	1.90106
circRNA002537	6:120005756-120013390,-	ENSSSCG00000003760	0	4.81165	1.09263	0.570191
circRNA002538	6:120012901-120013390,-	ENSSSCG00000003760	0	0	0.364211	0.950318
circRNA002541	6:121974469-121994919,-	ENSSSCG00000003761	0	0	0	0.380127
circRNA002542	6:122000799-122007755,-	ENSSSCG00000003761	2.31619	0	0	0
circRNA002551	6:125570379-125576069,-	ENSSSCG00000003768	0	0	0.364211	0
circRNA002556	6:125575598-125583858,-	ENSSSCG00000003768	0	0	0.364211	0.380127
circRNA002560	6:125615894-125619025,-	ENSSSCG00000003770	0	0	0	0.950318
circRNA002561	6:125617929-125633179,-	ENSSSCG00000003770	0	8.15894	0	0
circRNA002562	6:125633078-125671201,-	ENSSSCG00000003770	0	0	0.546316	0
circRNA002563	6:125658482-125671201,-	ENSSSCG00000003770	1.8949	7.5313	1.27474	1.33087
circRNA002565	6:125666113-125671201,-	ENSSSCG00000003770	0	0	0.728422	0
circRNA002567	6:125476804-125477945,+	ENSSSCG00000003771	0	0	0	0.570191
circRNA002569	6:125476804-125487944,+	ENSSSCG00000003771	0	0	0.728422	0
circRNA002572	6:125479399-125495394,+	ENSSSCG00000003771	0	0	0.728422	0.950318
circRNA002575	6:125923717-125939863,+	ENSSSCG00000003772	0	0	0	0.570191
circRNA002580	6:127528134-127528907,-	ENSSSCG00000003776	0	0	0.364211	0
circRNA002582	6:127528134-127534257,-	ENSSSCG00000003776	0	0	0	0.570191
circRNA002583	6:127528134-127539627,-	ENSSSCG00000003776	0	0	0	0.950318
circRNA002585	6:127534126-127539627,-	ENSSSCG00000003776	0	0	0	1.52093
circRNA002586	6:127534126-127543923,-	ENSSSCG00000003776	0	7.11274	0	0.950318
circRNA002596	6:128736987-128753848,+	ENSSSCG00000003784	1.05284	0	0	0
circRNA002600	6:132108168-132155299,+	ENSSSCG00000003790	0	0	0	0.380127
circRNA002603	6:132124984-132145007,+	ENSSSCG00000003790	0.631543	0	0.546316	0.950318
circRNA002604	6:132124984-132151229,+	ENSSSCG00000003790	0	0	0	0.570191
circRNA002606	6:132124984-132173603,+	ENSSSCG00000003790	1.47387	0	0.728422	0
circRNA002610	6:132195676-132213693,-	ENSSSCG00000003791	0	0	0.728422	0
circRNA002612	6:132199187-132201648,-	ENSSSCG00000003791	2.52671	0	0	0
circRNA002614	6:132199187-132217626,-	ENSSSCG00000003791	0	0	0.546316	0.570191
circRNA002617	6:132259507-132261114,+	ENSSSCG00000003792	0	0	0.728422	0.380127
circRNA002625	6:134072884-134074698,+	ENSSSCG00000003798	0	0	0	0.760254
circRNA002629	6:135405151-135413647,-	ENSSSCG00000003807	0	0	0	0.760254
circRNA002637	6:136788491-136802751,-	ENSSSCG00000003811	0	6.90366	0	0
circRNA002638	6:136788491-136808752,-	ENSSSCG00000003811	0	0	0.364211	0
circRNA002639	6:136802505-136808752,-	ENSSSCG00000003811	0	0	0	0.950318
circRNA002640	6:137190399-137200574,-	ENSSSCG00000003812	0	0	0	0.570191
circRNA002641	6:137193370-137195229,-	ENSSSCG00000003812	0	0	1.09263	0
circRNA002644	6:137387062-137397644,-	ENSSSCG00000003815	0	1.0462	0	0
circRNA002645	6:137828145-137846637,-	ENSSSCG00000003816	0	0	0	0.760254
circRNA002646	6:137828145-137861689,-	ENSSSCG00000003816	0	0	0.364211	0.380127
circRNA002648	6:137844859-137861689,-	ENSSSCG00000003816	0	0	3.2779	3.61163
circRNA002650	6:138053762-138070968,+	ENSSSCG00000003818	0	0	0.546316	0.380127
circRNA002658	6:138078890-138150517,+	ENSSSCG00000003818	1.26335	0	0.910527	0.760254
circRNA002667	6:140508683-140660768,-	ENSSSCG00000003828	0	5.43929	0	0
circRNA002669	6:140604562-140639893,-	ENSSSCG00000003828	3.79006	0	2.54948	2.85138
circRNA002670	6:140604562-140654469,-	ENSSSCG00000003828	0	0	0.364211	0
circRNA002675	6:140654254-140660768,-	ENSSSCG00000003828	2.31619	0	0	0
circRNA002680	6:141484092-141497256,+	ENSSSCG00000003831	0	0	0	0.380127
circRNA002683	6:143048816-143059562,+	ENSSSCG00000003833	0	3.97493	1.09263	1.14038
circRNA002685	6:143172385-143193008,+	ENSSSCG00000003834	0	0	0.546316	0
circRNA002689	6:145705904-145712703,-	ENSSSCG00000003844	0	4.18401	1.63895	1.14038
circRNA002691	6:146461780-146462728,+	ENSSSCG00000003846	0	0	1.63895	0.570191
circRNA002692	6:146614096-146622749,+	ENSSSCG00000003848	0	0	0.728422	0
circRNA002693	6:146619069-146622749,+	ENSSSCG00000003848	0.842325	0	3.82422	1.90106
circRNA002695	6:146619403-146622541,+	ENSSSCG00000003848	0	0	0	0.570191
circRNA002696	6:146629191-146631494,+	ENSSSCG00000003848	0	0	0	0.570191
circRNA002697	6:146633173-146634426,+	ENSSSCG00000003848	0	0	0.364211	0
circRNA002698	6:146637394-146642370,+	ENSSSCG00000003848	0	0	0.546316	0
circRNA002699	6:146642197-146642370,+	ENSSSCG00000003848	0	2.71965	0	0
circRNA002700	6:146754275-146755580,-	ENSSSCG00000003851	0	0	1.09263	0.950318
circRNA002707	6:147322125-147324123,-	ENSSSCG00000003859	0	1.67345	0	0.380127
circRNA002711	6:147350406-147430771,-	ENSSSCG00000003859	0	0	0.364211	0
circRNA002716	6:147497123-147502798,+	ENSSSCG00000003861	0	3.55637	0	0
circRNA002717	6:147575303-147581958,+	ENSSSCG00000003863	0	3.55637	0.546316	0
circRNA002720	6:147612967-147630071,+	ENSSSCG00000003863	0	0	1.63895	0
circRNA002726	6:147626971-147630071,+	ENSSSCG00000003863	0	0	0	1.33087
circRNA002732	6:148034939-148039521,+	ENSSSCG00000003870	0	0	0	0.950318
circRNA002734	6:148034939-148053243,+	ENSSSCG00000003870	0	0	0	0.380127
circRNA002736	6:148034939-148064823,+	ENSSSCG00000003870	0	0	0	0.570191
circRNA002740	6:148040877-148070397,+	ENSSSCG00000003870	0	0	0	1.14038
circRNA002742	6:148401538-148422837,+	ENSSSCG00000003872	0	0	2.54948	2.47125
circRNA002744	6:148414519-148422837,+	ENSSSCG00000003872	0	0	0	0.760254
circRNA002747	6:148440632-148454719,+	ENSSSCG00000003872	0	0	0.728422	0
circRNA002750	6:148463816-148466426,+	ENSSSCG00000003872	0	0	0	1.14038
circRNA002752	6:148463816-148486340,+	ENSSSCG00000003872	0	0	0	0.570191
circRNA002767	6:150842052-150846624,-	ENSSSCG00000003881	0	0	0.364211	0
circRNA002772	6:151794528-151802959,+	ENSSSCG00000003888	0	0	0	0.380127
circRNA002773	6:152329596-152336837,-	ENSSSCG00000003895	0.421029	0	0.728422	0
circRNA002776	6:152386477-152400930,+	ENSSSCG00000003898	0	0	0	0.380127
circRNA002780	6:152582456-152584497,-	ENSSSCG00000003902	0	0	0	0.380127
circRNA002783	6:152930464-152931251,-	ENSSSCG00000003913	0	0	1.09263	0
circRNA002785	6:153309525-153335056,+	ENSSSCG00000003917	1.47387	0	1.09263	3.04144
circRNA002786	6:153309525-153358353,+	ENSSSCG00000003917	0	0	0	2.85138
circRNA002787	6:153309525-153393008,+	ENSSSCG00000003917	0	0	0	2.09112
circRNA002789	6:153409584-153410270,-	ENSSSCG00000003918	0	0	0.364211	0
circRNA002790	6:154511954-154541301,+	ENSSSCG00000003935	0	0	0.910527	0
circRNA002792	6:154523122-154541301,+	ENSSSCG00000003935	0.631543	0	0.910527	0
circRNA002793	6:154523122-154552424,+	ENSSSCG00000003935	4.63239	20.711	6.91971	11.9761
circRNA002794	6:154541184-154552424,+	ENSSSCG00000003935	10.7384	7.32222	12.5647	8.36406
circRNA002799	6:156268224-156274548,-	ENSSSCG00000003965	0	0	0.364211	0
circRNA002816	6:57273438-57275894,-	ENSSSCG00000003994	0	0	0.364211	0
circRNA002817	6:57313185-57313647,-	ENSSSCG00000003995	0	0	0.364211	0
circRNA002819	6:57527313-57527492,-	ENSSSCG00000003998	0	0	0.364211	0
circRNA002825	1:2750751-2761837,-	ENSSSCG00000004018	0	0	0.910527	2.66131
circRNA002830	1:2764695-2770778,-	ENSSSCG00000004018	0	0	0	0.380127
circRNA002833	1:2783965-2790071,-	ENSSSCG00000004018	0	0	0.364211	0
circRNA002834	1:2783965-2814551,-	ENSSSCG00000004018	0	0	0.546316	0
circRNA002835	1:2789913-2814551,-	ENSSSCG00000004018	0	4.81165	0.546316	2.09112
circRNA002837	1:2805467-2814551,-	ENSSSCG00000004018	23.1614	48.7442	10.926	26.0429
circRNA002838	1:2808656-2814551,-	ENSSSCG00000004018	0	0	0.364211	0
circRNA002844	1:4648181-4658081,+	ENSSSCG00000004027	1.47387	0	0	0
circRNA002851	1:4685415-4708453,+	ENSSSCG00000004027	1.26335	0	0	0
circRNA002855	1:7351417-7650069,+	ENSSSCG00000004032	0	0	0	0.570191
circRNA002868	1:8795510-8844270,-	ENSSSCG00000004039	0	0	0	0.760254
circRNA002870	1:8808425-8844270,-	ENSSSCG00000004039	0	0	0.364211	0
circRNA002871	1:8838521-8844270,-	ENSSSCG00000004039	0	0	0.546316	1.33087
circRNA002878	1:9240838-9251868,-	ENSSSCG00000004044	0	0	0.364211	0
circRNA002879	1:9392358-9397924,+	ENSSSCG00000004048	0	0	2.91369	0
circRNA002880	1:9393569-9397339,+	ENSSSCG00000004048	0	6.27602	3.82422	0.760254
circRNA002881	1:9393569-9398731,+	ENSSSCG00000004048	0	0	0.546316	1.52093
circRNA002886	1:11855802-11878822,+	ENSSSCG00000004064	0	0	0	0.760254
circRNA002887	1:11872747-11878822,+	ENSSSCG00000004064	1.8949	0	0	0
circRNA002888	1:13630779-13632958,-	ENSSSCG00000004065	0	0	1.45684	1.14038
circRNA002890	1:14083796-14085261,-	ENSSSCG00000004070	0	0	0.364211	3.04144
circRNA002891	1:14083796-14086548,-	ENSSSCG00000004070	3.36903	0	2.73158	3.42157
circRNA002892	1:14083796-14089114,-	ENSSSCG00000004070	1.05284	0	0	0
circRNA002899	1:14096257-14103118,-	ENSSSCG00000004070	0	0	0.364211	0.380127
circRNA002900	1:14096257-14107726,-	ENSSSCG00000004070	0	0	0	0.380127
circRNA002902	1:14099142-14103118,-	ENSSSCG00000004070	0	0	0.910527	0
circRNA002903	1:14099142-14103753,-	ENSSSCG00000004070	0	0	0.910527	0.760254
circRNA002906	1:14101395-14103118,-	ENSSSCG00000004070	0	0	0	0.760254
circRNA002907	1:14101395-14103753,-	ENSSSCG00000004070	0	0	0.546316	1.71099
circRNA002908	1:14103621-14110711,-	ENSSSCG00000004070	0	0	0	0.380127
circRNA002911	1:14415408-14428257,+	ENSSSCG00000004071	0	0	0	1.71099
circRNA002914	1:14430630-14442646,+	ENSSSCG00000004071	0	0	0	0.570191
circRNA002917	1:16071819-16076133,-	ENSSSCG00000004081	0	0	0	0.380127
circRNA002919	1:16080528-16183454,-	ENSSSCG00000004081	0	0	0	0.570191
circRNA002921	1:16091210-16094862,-	ENSSSCG00000004081	0	0	0.546316	0
circRNA002922	1:16109507-16116681,-	ENSSSCG00000004081	0.421029	0	0	0.380127
circRNA002923	1:16112728-16124594,-	ENSSSCG00000004081	0	0	0	0.380127
circRNA002924	1:16119377-16124594,-	ENSSSCG00000004081	0	0	1.63895	0.570191
circRNA002925	1:16139073-16165251,-	ENSSSCG00000004081	0	0	0.546316	0
circRNA002926	1:16142011-16165251,-	ENSSSCG00000004081	0	0	0	0.950318
circRNA002927	1:16393881-16395904,+	ENSSSCG00000004082	0	0	0.546316	0
circRNA002932	1:16463107-16473752,+	ENSSSCG00000004082	0	0	0.728422	0
circRNA002933	1:16492759-16494951,+	ENSSSCG00000004082	0	0	0.546316	1.71099
circRNA002934	1:17075532-17075769,-	ENSSSCG00000004087	0	0	0.364211	0
circRNA002935	1:17075532-17091938,-	ENSSSCG00000004087	4.63239	0	1.09263	2.09112
circRNA002936	1:17075532-17097941,-	ENSSSCG00000004087	0	0	0	0.570191
circRNA002938	1:17075532-17123292,-	ENSSSCG00000004087	0	0	1.09263	4.56237
circRNA002941	1:17075532-17134778,-	ENSSSCG00000004087	5.26393	0	6.7376	8.174
circRNA002942	1:17087946-17091938,-	ENSSSCG00000004087	0	0	2.54948	6.65349
circRNA002943	1:17087946-17097941,-	ENSSSCG00000004087	0	0	0	0.760254
circRNA002944	1:17087946-17123292,-	ENSSSCG00000004087	0	0	0.728422	1.71099
circRNA002945	1:17087946-17134778,-	ENSSSCG00000004087	1.47387	0	1.82105	0
circRNA002946	1:17097740-17123292,-	ENSSSCG00000004087	0	0	0	0.380127
circRNA002949	1:17233497-17248742,+	ENSSSCG00000004089	0.842325	0	0	0.760254
circRNA002952	1:17603624-17606649,-	ENSSSCG00000004092	0	0	0.546316	0
circRNA002962	1:18659950-18663491,-	ENSSSCG00000004104	0	0	0.364211	1.33087
circRNA002963	1:18661829-18663491,-	ENSSSCG00000004104	0	0	0.546316	1.90106
circRNA002978	1:21161650-21222409,-	ENSSSCG00000004114	0	0	0.364211	0
circRNA002980	1:21173117-21239703,-	ENSSSCG00000004114	0	0	0.364211	0
circRNA002982	1:21191797-21222409,-	ENSSSCG00000004114	0	0	0	0.570191
circRNA002984	1:21200689-21222409,-	ENSSSCG00000004114	0	0	0	1.33087
circRNA002985	1:21209785-21235273,-	ENSSSCG00000004114	0	0	0	0.380127
circRNA002986	1:21218217-21231923,-	ENSSSCG00000004114	0	0	0.364211	0
circRNA002989	1:21865209-21869835,+	ENSSSCG00000004120	0	0	0.364211	0
circRNA002998	1:22008330-22010368,+	ENSSSCG00000004121	0	0	0	0.380127
circRNA002999	1:22086460-22126571,+	ENSSSCG00000004122	0	0	0.364211	0
circRNA003000	1:23010568-23016578,-	ENSSSCG00000004123	0	8.99566	0.364211	0.950318
circRNA003001	1:23026020-23051903,-	ENSSSCG00000004123	0	1.88292	0	0
circRNA003002	GL892277.2:75153-76804,-	ENSSSCG00000004124	0	0	0	0.570191
circRNA003003	GL892277.2:75153-83123,-	ENSSSCG00000004124	0	0	0.728422	0
circRNA003004	GL892277.2:80611-83123,-	ENSSSCG00000004124	0	0	0	0.950318
circRNA003005	1:23834116-23849645,-	ENSSSCG00000004132	0	0	0	0.380127
circRNA003007	1:23847400-23871574,-	ENSSSCG00000004132	0	2.51056	0	0
circRNA003009	1:24139041-24139381,+	ENSSSCG00000004133	0	0	0	0.380127
circRNA003012	1:25357025-25360852,+	ENSSSCG00000004139	0.631543	0	0	0
circRNA003017	1:25518796-25530074,-	ENSSSCG00000004140	0	0	0.546316	0
circRNA003021	1:28658852-28664480,+	ENSSSCG00000004146	0	4.60257	0.546316	1.33087
circRNA003023	1:28662024-28664480,+	ENSSSCG00000004146	0	0	0	0.380127
circRNA003027	1:29829029-29829654,-	ENSSSCG00000004154	0	0	0	0.570191
circRNA003031	1:32054761-32056727,+	ENSSSCG00000004166	0	0.418557	0	0
circRNA003032	1:32054761-32072573,+	ENSSSCG00000004166	0	0	1.63895	0
circRNA003035	1:32054761-32104524,+	ENSSSCG00000004166	0	0	0	0.380127
circRNA003037	1:32069209-32072573,+	ENSSSCG00000004166	0	0	0	0.950318
circRNA003039	1:32069209-32112092,+	ENSSSCG00000004166	0	0	0	0.760254
circRNA003040	1:32080656-32093129,+	ENSSSCG00000004166	0	0	0	0.760254
circRNA003047	1:32124161-32143578,+	ENSSSCG00000004166	0	0	0	1.52093
circRNA003048	1:32124161-32169111,+	ENSSSCG00000004166	0	0	0	2.28119
circRNA003059	1:32524814-32540017,+	ENSSSCG00000004169	0	0	0	0.380127
circRNA003064	1:35248673-35256294,-	ENSSSCG00000004193	0	0	0	0.950318
circRNA003065	1:35479000-35482118,-	ENSSSCG00000004196	0.631543	0	0	0
circRNA003066	1:35479000-35489992,-	ENSSSCG00000004196	0	0	0	0.950318
circRNA003067	1:35479000-35499044,-	ENSSSCG00000004196	0	2.09201	0	0
circRNA003069	1:35486158-35489992,-	ENSSSCG00000004196	0	0	0.364211	0
circRNA003070	1:35488668-35489992,-	ENSSSCG00000004196	1.26335	0	0	0
circRNA003072	1:36601105-36608023,+	ENSSSCG00000004202	0	0	0	0.570191
circRNA003074	1:36687164-36694300,-	ENSSSCG00000004203	0	0	0.364211	0
circRNA003075	1:36705594-36712852,-	ENSSSCG00000004203	0	0	0.546316	0.760254
circRNA003076	1:36715009-36718719,-	ENSSSCG00000004203	2.10568	0	0.910527	1.14038
circRNA003077	1:37116537-37126736,+	ENSSSCG00000004205	0	0	0.364211	0
circRNA003078	1:37134828-37143270,+	ENSSSCG00000004205	0	0	0	1.71099
circRNA003084	1:38479515-38559582,+	ENSSSCG00000004209	0	0	0	0.950318
circRNA003085	1:38479515-38581068,+	ENSSSCG00000004209	0	8.36802	0	0
circRNA003090	1:38556809-38611471,+	ENSSSCG00000004209	0	0	0	0.760254
circRNA003092	1:38719884-38735658,+	ENSSSCG00000004209	0	0	0	0.380127
circRNA003096	1:39635368-39754248,-	ENSSSCG00000004218	0	0	0	0.380127
circRNA003099	1:40737382-40767556,-	ENSSSCG00000004220	1.8949	0	1.27474	0
circRNA003100	1:40745354-40760525,-	ENSSSCG00000004220	0	0	0	0.570191
circRNA003104	1:40861688-40892122,-	ENSSSCG00000004222	0	0	0.364211	0
circRNA003106	1:40891901-40936935,-	ENSSSCG00000004222	0	0	1.27474	1.90106
circRNA003110	1:45632971-45640532,+	ENSSSCG00000004242	0	0	0.546316	0
circRNA003111	1:45632971-45654779,+	ENSSSCG00000004242	1.26335	0	0	0
circRNA003113	1:45632971-45682546,+	ENSSSCG00000004242	0	0	0	0.380127
circRNA003115	1:45640354-45721056,+	ENSSSCG00000004242	0	0	0	0.570191
circRNA003122	1:45701229-45706203,+	ENSSSCG00000004242	0	0	0	0.570191
circRNA003123	1:45701229-45721056,+	ENSSSCG00000004242	0	0	0.728422	0.380127
circRNA003125	1:45701229-45737883,+	ENSSSCG00000004242	0	0	0.546316	0
circRNA003128	1:45734304-45787500,+	ENSSSCG00000004242	1.05284	0	0	0
circRNA003135	1:48636667-48636829,+	ENSSSCG00000004249	0	0	0.546316	0
circRNA003136	1:48636667-48671226,+	ENSSSCG00000004249	0	0	0.364211	0
circRNA003137	1:48636667-48710378,+	ENSSSCG00000004249	0	0	0	0.380127
circRNA003138	1:48670438-48671226,+	ENSSSCG00000004249	0	0	0.546316	0
circRNA003143	1:48758285-48780196,+	ENSSSCG00000004249	0	0	0.546316	0
circRNA003144	1:49609704-49624011,+	ENSSSCG00000004253	0	0	0.546316	0
circRNA003145	1:49615190-49621499,+	ENSSSCG00000004253	0	3.76546	0	0
circRNA003147	1:49619803-49621283,+	ENSSSCG00000004253	0	0	0	0.570191
circRNA003150	1:50184401-50187152,-	ENSSSCG00000004262	0.421029	0	0	0
circRNA003162	1:55626101-55631926,+	ENSSSCG00000004270	0	0	0.546316	0
circRNA003166	1:56080745-56096675,-	ENSSSCG00000004272	0	0	0.364211	0
circRNA003169	1:57105761-57195641,+	ENSSSCG00000004276	1.26335	0	0.364211	1.33087
circRNA003186	1:58460994-58517592,+	ENSSSCG00000004280	0	0	0	1.52093
circRNA003190	1:58484448-58517592,+	ENSSSCG00000004280	0	0	0.910527	0.380127
circRNA003200	1:59703027-59706038,-	ENSSSCG00000004289	0	0	0	0.570191
circRNA003201	1:59707495-59713073,-	ENSSSCG00000004289	0	0	0.364211	1.71099
circRNA003202	1:59707495-59715138,-	ENSSSCG00000004289	0	0	0	0.570191
circRNA003204	1:59709106-59718542,-	ENSSSCG00000004289	0	0	0	0.380127
circRNA003209	1:59726630-59744379,-	ENSSSCG00000004289	0.631543	0	0.728422	2.28119
circRNA003210	1:59728050-59742442,-	ENSSSCG00000004289	0	0	0	0.760254
circRNA003211	1:59728050-59744379,-	ENSSSCG00000004289	1.68438	8.99566	2.18527	3.80169
circRNA003213	1:59739761-59752746,-	ENSSSCG00000004289	0	0	0.728422	1.52093
circRNA003214	1:59739761-59755752,-	ENSSSCG00000004289	0	0	0	0.760254
circRNA003218	1:60892774-60959765,-	ENSSSCG00000004293	0	0	0	0.570191
circRNA003223	1:60893529-60959765,-	ENSSSCG00000004293	0	0	0	0.380127
circRNA003224	1:60900122-60945988,-	ENSSSCG00000004293	0	0	0	0.380127
circRNA003225	1:60905556-60924967,-	ENSSSCG00000004293	0	2.92873	0	0
circRNA003226	1:60908343-60924967,-	ENSSSCG00000004293	0	0	0.728422	0.760254
circRNA003227	1:60917933-60924967,-	ENSSSCG00000004293	0	0	0.364211	0
circRNA003229	1:60917933-60959765,-	ENSSSCG00000004293	0	0	1.27474	0.570191
circRNA003230	1:60924834-60932819,-	ENSSSCG00000004293	1.05284	0	1.45684	4.37231
circRNA003232	1:60924834-60959765,-	ENSSSCG00000004293	1.8949	0	0	0
circRNA003237	1:60958626-60959765,-	ENSSSCG00000004293	0	0	0	0.570191
circRNA003238	1:61006638-61007238,-	ENSSSCG00000004294	0	0	1.82105	0.760254
circRNA003239	1:61006638-61009838,-	ENSSSCG00000004294	0	0	0	0.760254
circRNA003240	1:61006638-61011614,-	ENSSSCG00000004294	0	0	0.364211	1.90106
circRNA003243	1:62688791-62693450,+	ENSSSCG00000004306	0	0	0.546316	0.380127
circRNA003244	1:62694949-62699277,+	ENSSSCG00000004306	0	0	0.364211	0
circRNA003246	1:62694949-62728124,+	ENSSSCG00000004306	3.36903	0	0	0.570191
circRNA003247	1:62793095-62795885,-	ENSSSCG00000004307	0	0	0.364211	0
circRNA003248	1:63739622-63748701,-	ENSSSCG00000004311	0	0	0	0.570191
circRNA003250	1:63741388-63748701,-	ENSSSCG00000004311	0	0	1.63895	0.950318
circRNA003254	1:64125098-64134683,-	ENSSSCG00000004317	0	0	0.364211	0
circRNA003255	1:64127212-64132372,-	ENSSSCG00000004317	0	0	0	1.71099
circRNA003258	1:64530709-64532147,+	ENSSSCG00000004322	0	0	1.45684	3.99218
circRNA003261	1:64635651-64636511,-	ENSSSCG00000004328	2.52671	0	0.364211	0
circRNA003262	1:64635652-64636511,-	ENSSSCG00000004328	0	0	0	0.570191
circRNA003267	1:64737842-64740083,-	ENSSSCG00000004329	0	0	0	0.760254
circRNA003269	1:64739889-64754863,-	ENSSSCG00000004329	0.421029	0	0	0
circRNA003273	1:71041496-71055642,+	ENSSSCG00000004337	0	0	1.09263	0
circRNA003277	1:74443451-74460814,-	ENSSSCG00000004347	0	9.83239	0	0.380127
circRNA003282	1:75077812-75089458,-	ENSSSCG00000004351	0	0	0	0.950318
circRNA003284	1:75089370-75101925,-	ENSSSCG00000004351	0	0	0.364211	0
circRNA003286	1:76114941-76117037,-	ENSSSCG00000004358	0	0	0.364211	0
circRNA003299	1:80327076-80347867,-	ENSSSCG00000004364	1.8949	0	0	0
circRNA003302	1:80332935-80356402,-	ENSSSCG00000004364	0	0	0.910527	0
circRNA003308	JH118901.1:410483-424410,-	ENSSSCG00000004370	0	0	0.364211	0
circRNA003315	1:83291218-83296789,-	ENSSSCG00000004382	0	0	0.364211	0
circRNA003320	1:84047499-84048935,+	ENSSSCG00000004387	0	0	2.00316	2.28119
circRNA003332	1:85695288-85703152,+	ENSSSCG00000004403	0	0	0.364211	0
circRNA003334	1:84754695-84779222,-	ENSSSCG00000004413	0	0	0.546316	0
circRNA003336	1:86823314-86826829,-	ENSSSCG00000004418	0	0	0	0.380127
circRNA003338	1:87177690-87187924,-	ENSSSCG00000004421	0	0	0.364211	0
circRNA003340	1:87749485-87752243,-	ENSSSCG00000004425	0	0	0	0.380127
circRNA003343	1:87771903-87782213,-	ENSSSCG00000004425	0	0	0.364211	0
circRNA003346	1:89933206-89940816,-	ENSSSCG00000004432	0	0	0	0.950318
circRNA003348	1:89940533-89940816,-	ENSSSCG00000004432	0	0	0.364211	0.380127
circRNA003350	1:89946849-89947529,-	ENSSSCG00000004432	0	0	1.09263	0
circRNA003352	1:92399093-92400273,+	ENSSSCG00000004446	0	0	0.364211	1.14038
circRNA003362	1:93126379-93142829,+	ENSSSCG00000004454	10.5279	0	0.546316	0
circRNA003367	1:93205194-93221572,+	ENSSSCG00000004454	0.631543	0	0	0
circRNA003374	1:93410710-93415072,-	ENSSSCG00000004457	0	7.32222	0.364211	0
circRNA003379	1:94529064-94595460,+	ENSSSCG00000004460	0	0	0.364211	0
circRNA003380	1:94535553-94542426,+	ENSSSCG00000004460	0	0	0.364211	0.760254
circRNA003383	1:94559521-94575209,+	ENSSSCG00000004460	0	0	0.364211	0
circRNA003384	1:94559521-94577735,+	ENSSSCG00000004460	0	0	0.364211	0
circRNA003385	1:94568796-94577735,+	ENSSSCG00000004460	0	10.6695	0	0.380127
circRNA003386	1:94575045-94577735,+	ENSSSCG00000004460	0	0	0.546316	0
circRNA003387	1:94575045-94595460,+	ENSSSCG00000004460	0	0	0.910527	0.570191
circRNA003388	1:96603029-96663976,-	ENSSSCG00000004465	0.421029	1.67345	0	0.950318
circRNA003396	1:97905978-97924771,+	ENSSSCG00000004473	1.47387	14.644	3.64211	1.14038
circRNA003400	1:97983037-97985752,+	ENSSSCG00000004473	0	1.88292	0.364211	0.570191
circRNA003401	1:97983037-97988350,+	ENSSSCG00000004473	0	0	0.910527	0
circRNA003404	1:100993143-101026424,-	ENSSSCG00000004478	0	0	0	0.380127
circRNA003406	1:101009472-101026424,-	ENSSSCG00000004478	0.842325	0	0	0
circRNA003408	1:101019546-101026424,-	ENSSSCG00000004478	0	0	0.364211	0
circRNA003409	1:101025816-101041064,-	ENSSSCG00000004478	1.05284	0	0	0
circRNA003411	1:101848831-101856904,+	ENSSSCG00000004484	0	0	1.09263	0.950318
circRNA003412	1:101856739-101866607,+	ENSSSCG00000004484	0	0	0	0.380127
circRNA003413	1:101885135-101886036,+	ENSSSCG00000004484	0	0	0	0.380127
circRNA003414	1:103139247-103149348,-	ENSSSCG00000004485	0	0	0.364211	0
circRNA003416	1:103173036-103180516,-	ENSSSCG00000004485	0	0	0.728422	0.950318
circRNA003418	1:103206285-103226272,-	ENSSSCG00000004485	0	0	0	0.380127
circRNA003419	1:103346986-103365781,+	ENSSSCG00000004486	0	0	0.364211	0
circRNA003422	1:103504054-103513105,-	ENSSSCG00000004487	0	0	0	0.380127
circRNA003425	1:103512706-103513105,-	ENSSSCG00000004487	1.26335	0	0	0
circRNA003429	1:103520243-103520896,-	ENSSSCG00000004487	0	0	0.546316	0.380127
circRNA003430	1:103475506-103476478,+	ENSSSCG00000004489	0	0	0	0.380127
circRNA003435	1:105951341-105951833,+	ENSSSCG00000004499	2.73722	0	0	0.760254
circRNA003437	1:106906244-106964621,-	ENSSSCG00000004505	0	0	0	0.570191
circRNA003439	1:106924969-106964621,-	ENSSSCG00000004505	0	0	1.09263	0
circRNA003440	1:106964332-106964621,-	ENSSSCG00000004505	0	0	0.546316	0
circRNA003443	1:107795203-107835060,+	ENSSSCG00000004506	0	0	0.910527	0
circRNA003446	1:107885623-107985266,+	ENSSSCG00000004506	0	0	0.364211	0
circRNA003447	1:107929919-107933933,+	ENSSSCG00000004506	0	0	0.728422	2.09112
circRNA003448	1:108642295-108644554,+	ENSSSCG00000004509	2.10568	0	0	0
circRNA003459	1:110359180-110399307,+	ENSSSCG00000004522	0	0	0.364211	0
circRNA003460	1:110525007-110532832,+	ENSSSCG00000004524	0	11.7153	1.27474	2.66131
circRNA003461	1:110525007-110538400,+	ENSSSCG00000004524	0	0	14.9321	22.6214
circRNA003462	1:110525007-110548336,+	ENSSSCG00000004524	11.1597	79.2875	24.9476	41.6307
circRNA003463	1:110525007-110560153,+	ENSSSCG00000004524	0	0	0	0.950318
circRNA003464	1:110526473-110532832,+	ENSSSCG00000004524	0	0	0.546316	0
circRNA003466	1:110532619-110548336,+	ENSSSCG00000004524	5.47444	6.06693	1.63895	0
circRNA003468	1:113957631-114049837,-	ENSSSCG00000004528	0	0	0	0.760254
circRNA003469	1:114109374-114121891,+	ENSSSCG00000004529	1.05284	0	1.09263	0.380127
circRNA003471	1:114172441-114182629,+	ENSSSCG00000004531	0	0	0.364211	0
circRNA003473	1:115163044-115173093,-	ENSSSCG00000004535	0	0	2.00316	1.52093
circRNA003474	1:116730738-116748998,-	ENSSSCG00000004537	0	0	0.546316	3.04144
circRNA003475	1:116733952-116748998,-	ENSSSCG00000004537	0	0	0.546316	1.33087
circRNA003476	1:116736712-116748998,-	ENSSSCG00000004537	0	0	0.364211	1.52093
circRNA003477	1:116747310-116748998,-	ENSSSCG00000004537	0	0	0.910527	0
circRNA003480	1:116835410-116840574,+	ENSSSCG00000004538	0	0	0.546316	0
circRNA003483	1:116898187-116900708,+	ENSSSCG00000004538	5.05341	17.5732	8.01234	14.0668
circRNA003484	1:117474207-117477870,-	ENSSSCG00000004541	0	0	0	0.570191
circRNA003486	1:117494796-117498416,+	ENSSSCG00000004542	0	0	0	2.28119
circRNA003488	1:117504415-117508579,+	ENSSSCG00000004542	0	0	0.910527	0
circRNA003492	1:118180631-118184320,-	ENSSSCG00000004551	0	0	0.728422	0
circRNA003494	1:118377838-118378712,-	ENSSSCG00000004551	0	0	4.55234	7.98394
circRNA003495	1:118422478-118445673,-	ENSSSCG00000004552	0	0	0	0.570191
circRNA003496	1:118441846-118445673,-	ENSSSCG00000004552	0	0	0.546316	0
circRNA003499	1:118831792-118836593,+	ENSSSCG00000004556	0.842325	0	0	0
circRNA003501	1:119450347-119475959,+	ENSSSCG00000004561	0	0	0	0.570191
circRNA003503	1:119456366-119464400,+	ENSSSCG00000004561	0	0	0.364211	0
circRNA003504	1:119456366-119472571,+	ENSSSCG00000004561	0	0	0	0.570191
circRNA003507	1:119472302-119474131,+	ENSSSCG00000004561	0	0	0.364211	0
circRNA003514	1:119524203-119527500,+	ENSSSCG00000004561	0	0	0	0.380127
circRNA003519	1:119589317-119598313,+	ENSSSCG00000004563	0	0	0	0.380127
circRNA003526	1:120220839-120226027,-	ENSSSCG00000004570	1.05284	0	0	0
circRNA003532	1:123256030-123276564,+	ENSSSCG00000004577	0	0	0	0.380127
circRNA003533	1:123256030-123293376,+	ENSSSCG00000004577	0	0	0.728422	0
circRNA003536	1:124552796-124562502,-	ENSSSCG00000004586	0	0	0	0.380127
circRNA003543	1:124801757-124816635,+	ENSSSCG00000004587	1.8949	0	2.00316	0
circRNA003546	1:124811204-124827295,+	ENSSSCG00000004587	0	0	0.546316	0
circRNA003555	1:124861733-124875364,+	ENSSSCG00000004587	0	9.41422	0	0
circRNA003557	1:124861733-124880424,+	ENSSSCG00000004587	0	0	0	0.760254
circRNA003558	1:124861733-124884580,+	ENSSSCG00000004587	0	0	0.364211	0
circRNA003560	1:124875217-124884580,+	ENSSSCG00000004587	0	0	0.364211	0
circRNA003561	1:124875217-124895832,+	ENSSSCG00000004587	0	0	0	0.380127
circRNA003562	1:124924404-124939268,-	ENSSSCG00000004588	0	4.18401	0	0
circRNA003563	1:124967958-124974989,-	ENSSSCG00000004589	0	0	0	0.760254
circRNA003564	1:124967958-124977239,-	ENSSSCG00000004589	0	0	0.364211	0
circRNA003571	1:124986332-124997171,-	ENSSSCG00000004589	2.10568	0	0	0
circRNA003574	1:124997044-125013992,-	ENSSSCG00000004589	1.47387	7.74038	1.27474	1.71099
circRNA003575	1:125013096-125013992,-	ENSSSCG00000004589	0.631543	0	2.00316	1.33087
circRNA003576	1:125216285-125219611,-	ENSSSCG00000004590	1.05284	0	2.91369	3.80169
circRNA003577	1:125219031-125219611,-	ENSSSCG00000004590	14.5284	36.6103	24.037	30.0351
circRNA003582	1:125491717-125499226,-	ENSSSCG00000004595	0	0	0	0.760254
circRNA003586	1:126859244-126950090,-	ENSSSCG00000004600	0	0	0.364211	0
circRNA003589	1:126926295-126950090,-	ENSSSCG00000004600	0	3.1382	0	0
circRNA003591	1:126947680-126950090,-	ENSSSCG00000004600	0	0	4.55234	1.71099
circRNA003592	1:126948410-127433537,-	ENSSSCG00000004600	0	0	1.09263	0
circRNA003593	1:127113151-127147715,-	ENSSSCG00000004600	0	0	0.364211	0
circRNA003594	1:127972024-128023881,-	ENSSSCG00000004602	0	2.30109	0	0
circRNA003596	1:127997792-128023881,-	ENSSSCG00000004602	3.79006	0	3.82422	5.13256
circRNA003597	1:127997792-128030115,-	ENSSSCG00000004602	0	0	6.00918	8.74419
circRNA003598	1:127997792-128040020,-	ENSSSCG00000004602	0.842325	0	2.73158	7.22368
circRNA003601	1:128019977-128040020,-	ENSSSCG00000004602	3.79006	0	0	3.2315
circRNA003605	1:130207560-130219709,-	ENSSSCG00000004614	0	0	0.364211	0
circRNA003613	1:132349759-132380462,+	ENSSSCG00000004620	0	0	0.364211	0
circRNA003619	1:132441606-132453607,+	ENSSSCG00000004620	0	0	0.364211	1.52093
circRNA003622	1:132648323-132660935,+	ENSSSCG00000004622	0	6.69457	0	0
circRNA003623	1:132819045-132825754,-	ENSSSCG00000004624	0	0	0.364211	0
circRNA003624	1:132825589-132830751,-	ENSSSCG00000004624	0	0	0.910527	0.760254
circRNA003625	1:132828552-132830751,-	ENSSSCG00000004624	1.26335	0	0	0.570191
circRNA003628	1:132962461-132969266,-	ENSSSCG00000004626	0	0	0.728422	0
circRNA003629	1:132962461-132974980,-	ENSSSCG00000004626	0	0	0.364211	0
circRNA003631	1:132965229-132969266,-	ENSSSCG00000004626	0	0	0.364211	0
circRNA003632	1:132965229-132974980,-	ENSSSCG00000004626	2.10568	0	0.728422	0
circRNA003633	1:132967047-132969266,-	ENSSSCG00000004626	0	1.46437	0	0
circRNA003634	1:132967047-132995990,-	ENSSSCG00000004626	0	0	0.364211	0
circRNA003636	1:133238559-133242196,+	ENSSSCG00000004628	0	0	0.546316	0
circRNA003640	1:133499718-133512016,-	ENSSSCG00000004632	1.8949	0	0	0
circRNA003644	1:134518066-134520926,+	ENSSSCG00000004635	0	0	0.364211	0
circRNA003645	1:134518964-134526927,+	ENSSSCG00000004635	0	2.09201	0	0.760254
circRNA003651	1:134607758-134615687,+	ENSSSCG00000004636	0	0	0.546316	0
circRNA003657	1:134632354-134636559,+	ENSSSCG00000004636	0	0	1.82105	5.13256
circRNA003660	1:134632354-134657483,+	ENSSSCG00000004636	0	0	0	1.14038
circRNA003663	1:134640968-134670263,+	ENSSSCG00000004636	0	0	0.364211	0
circRNA003672	1:134770023-134774718,-	ENSSSCG00000004639	8.84347	24.6859	6.19129	10.2651
circRNA003674	1:134770023-134790152,-	ENSSSCG00000004639	3.36903	0	2.00316	2.66131
circRNA003676	1:134774497-134782945,-	ENSSSCG00000004639	0	0	0	0.760254
circRNA003677	1:134774497-134790152,-	ENSSSCG00000004639	0	0	0	0.760254
circRNA003679	1:134775183-134797103,-	ENSSSCG00000004639	0	0	0	0.950318
circRNA003680	1:134778128-134790152,-	ENSSSCG00000004639	0	0	0	2.09112
circRNA003681	1:134778128-134797103,-	ENSSSCG00000004639	0	0	0	0.950318
circRNA003682	1:134782800-134787969,-	ENSSSCG00000004639	2.10568	8.36802	7.10181	10.6453
circRNA003686	1:135097122-135106264,+	ENSSSCG00000004645	0	0	0.910527	0
circRNA003687	1:135097122-135124097,+	ENSSSCG00000004645	0	0	0	0.380127
circRNA003688	1:135371125-135377427,+	ENSSSCG00000004646	0	0	0	0.760254
circRNA003692	1:136203227-136275220,-	ENSSSCG00000004651	0	0	0	0.380127
circRNA003695	1:136271278-136281229,-	ENSSSCG00000004651	0	0	0	0.380127
circRNA003698	1:136466616-136469087,+	ENSSSCG00000004653	0	0	0	0.380127
circRNA003702	1:136466616-136501633,+	ENSSSCG00000004653	0	0	1.09263	0
circRNA003703	1:136475793-136477100,+	ENSSSCG00000004653	0	0	0.546316	0
circRNA003707	1:136476984-136495164,+	ENSSSCG00000004653	0	0	0.364211	0.380127
circRNA003708	1:136476984-136501633,+	ENSSSCG00000004653	0	0	0	0.570191
circRNA003710	1:136483457-136484544,+	ENSSSCG00000004653	0	0	0	0.570191
circRNA003711	1:136483457-136493027,+	ENSSSCG00000004653	0	0	0	0.760254
circRNA003713	1:136491041-136501633,+	ENSSSCG00000004653	1.47387	0	0	0.570191
circRNA003717	1:137269247-137269990,+	ENSSSCG00000004658	1.47387	0	0	0
circRNA003724	1:141274413-141278890,-	ENSSSCG00000004679	0.421029	0	0	0
circRNA003731	1:141993841-141994380,+	ENSSSCG00000004693	0	0	1.63895	1.90106
circRNA003734	1:142617448-142635716,-	ENSSSCG00000004700	0	0	0.364211	0
circRNA003743	1:142929350-142930389,-	ENSSSCG00000004708	0	0	0	0.380127
circRNA003748	1:143245292-143256012,+	ENSSSCG00000004717	0	0	0.546316	0
circRNA003749	1:143245292-143260648,+	ENSSSCG00000004717	1.68438	0	0	0
circRNA003755	1:143245292-143285303,+	ENSSSCG00000004717	0	0	0.364211	0
circRNA003761	1:143279274-143291819,+	ENSSSCG00000004717	0	0	0	0.380127
circRNA003762	1:143361256-143365464,+	ENSSSCG00000004718	0	0	0	0.380127
circRNA003768	1:143396358-143426509,+	ENSSSCG00000004718	0	0	0.364211	0
circRNA003772	1:143420872-143440106,+	ENSSSCG00000004718	0	0	0.364211	0
circRNA003782	1:143833231-143837586,+	ENSSSCG00000004725	2.31619	0	0.546316	0
circRNA003788	1:143745596-143756948,-	ENSSSCG00000004727	0	0	0.546316	0
circRNA003794	1:143939293-143978082,-	ENSSSCG00000004729	0	0	0	0.380127
circRNA003796	1:143955136-143971028,-	ENSSSCG00000004729	1.05284	0	0	0.570191
circRNA003803	1:144113380-144117578,+	ENSSSCG00000004731	0	0	0.364211	0.760254
circRNA003805	1:144705006-144706137,+	ENSSSCG00000004739	1.47387	7.5313	12.5647	15.3977
circRNA003806	1:144705006-144732163,+	ENSSSCG00000004739	0	0	0	0.380127
circRNA003807	1:144729932-144732163,+	ENSSSCG00000004739	0	0	0	1.52093
circRNA003813	1:144963658-144964258,-	ENSSSCG00000004747	0	8.57711	0	0
circRNA003815	1:145401677-145403239,+	ENSSSCG00000004753	0	0	0	1.71099
circRNA003817	1:145401677-145414361,+	ENSSSCG00000004753	0	0	0	0.570191
circRNA003818	1:145401677-145417869,+	ENSSSCG00000004753	0	0	0	0.380127
circRNA003820	1:145408742-145439488,+	ENSSSCG00000004753	0	0	1.09263	2.66131
circRNA003822	1:145412857-145436055,+	ENSSSCG00000004753	0	0	0.364211	0
circRNA003824	1:145416171-145417869,+	ENSSSCG00000004753	0	11.2968	1.63895	0
circRNA003827	1:145425642-145439488,+	ENSSSCG00000004753	0	6.90366	0	0
circRNA003829	1:145429098-145436055,+	ENSSSCG00000004753	0	8.78658	1.09263	1.90106
circRNA003830	1:145429098-145438147,+	ENSSSCG00000004753	0	0	0.728422	0
circRNA003835	1:145462506-145486713,+	ENSSSCG00000004753	0	0	0	0.950318
circRNA003837	1:145546467-145547562,-	ENSSSCG00000004755	0	0	0.546316	0
circRNA003838	1:146912897-146913323,-	ENSSSCG00000004789	0	0	1.27474	0
circRNA003839	1:146914061-146914847,-	ENSSSCG00000004789	0	0	0.728422	0
circRNA003844	1:148459941-148497434,-	ENSSSCG00000004793	0	0	0.364211	0.760254
circRNA003845	1:148474710-148497434,-	ENSSSCG00000004793	0	0	0.728422	0
circRNA003848	1:152311285-152326850,-	ENSSSCG00000004802	1.8949	0	0	0
circRNA003849	1:152319828-152326850,-	ENSSSCG00000004802	2.31619	0	0	0
circRNA003852	1:153554311-153569063,-	ENSSSCG00000004812	0	2.09201	0	0
circRNA003853	1:153562295-153565321,-	ENSSSCG00000004812	0	0	0.546316	0
circRNA003854	1:153772466-153773012,-	ENSSSCG00000004812	0	0	0	0.570191
circRNA003856	1:154082448-154123607,-	ENSSSCG00000004813	2.73722	0	2.36737	1.71099
circRNA003858	1:154139504-154142929,-	ENSSSCG00000004813	0	0	0.364211	0
circRNA003865	1:155827294-155828841,+	ENSSSCG00000004823	0	11.7153	0.364211	0.760254
circRNA003866	1:156020860-156021356,-	ENSSSCG00000004825	0	7.32222	0.910527	0
circRNA003869	6:136124950-136127697,-	ENSSSCG00000004829	0	0	0.546316	0
circRNA003872	6:136168782-136178689,-	ENSSSCG00000004829	0	0	0.546316	0
circRNA003874	1:157482035-157486077,+	ENSSSCG00000004830	0	0	0.364211	0
circRNA003875	1:157500054-157507946,+	ENSSSCG00000004830	0	0	0.728422	0
circRNA003876	1:157507869-157517469,+	ENSSSCG00000004830	0	0	0.364211	0
circRNA003877	1:157816757-157857097,+	ENSSSCG00000004832	0	0	0	0.570191
circRNA003878	1:157816757-157879888,+	ENSSSCG00000004832	0	0	0	0.760254
circRNA003880	1:157849876-157879888,+	ENSSSCG00000004832	0	0	0	0.570191
circRNA003881	1:157867646-157879888,+	ENSSSCG00000004832	2.73722	0	0	0
circRNA003891	1:159880606-159905970,-	ENSSSCG00000004845	0	0	0.364211	0
circRNA003893	1:159887007-159901920,-	ENSSSCG00000004845	0	0	0	0.570191
circRNA003894	1:159894749-159905970,-	ENSSSCG00000004845	0	0	0	0.380127
circRNA003895	1:159899220-159905970,-	ENSSSCG00000004845	0	12.552	0.728422	0.380127
circRNA003896	1:159904575-159905970,-	ENSSSCG00000004845	0	0	0.364211	0
circRNA003904	1:161699775-161765610,-	ENSSSCG00000004857	1.8949	0	0.364211	0
circRNA003905	1:161699775-161771667,-	ENSSSCG00000004857	0	0	0.728422	0
circRNA003907	1:161713075-161765610,-	ENSSSCG00000004857	0	0	4.18813	3.2315
circRNA003911	1:161725477-161781848,-	ENSSSCG00000004857	0	0	1.09263	0.380127
circRNA003912	1:161745225-161765610,-	ENSSSCG00000004857	0	0	0.910527	0
circRNA003915	1:161765501-161771667,-	ENSSSCG00000004857	0	0	0.364211	0
circRNA003916	1:161765501-161781848,-	ENSSSCG00000004857	1.26335	0	0.364211	0
circRNA003926	1:176156293-176177307,-	ENSSSCG00000004896	0	0	0.364211	0
circRNA003930	1:176170426-176186618,-	ENSSSCG00000004896	0	0	0.364211	0
circRNA003940	1:176740563-176742136,-	ENSSSCG00000004899	0	0	1.09263	0
circRNA003941	1:176789553-176792357,+	ENSSSCG00000004901	0	0	0.364211	0
circRNA003942	1:176789553-176797284,+	ENSSSCG00000004901	0	0	0	0.380127
circRNA003954	1:179099937-179102403,+	ENSSSCG00000004907	0	0	0.364211	0
circRNA003960	1:179974929-179981667,-	ENSSSCG00000004919	0	0	0.364211	0
circRNA003965	GL894386.1:27339-42489,-	ENSSSCG00000004921	0	0	0.364211	1.14038
circRNA003970	1:180708439-180715180,-	ENSSSCG00000004927	0	0	0	1.71099
circRNA003972	1:180714490-180715180,-	ENSSSCG00000004927	0	0	0.546316	0
circRNA003973	1:180714490-180723180,-	ENSSSCG00000004927	0	0	0.910527	0
circRNA003975	1:180736415-180737438,-	ENSSSCG00000004927	0	0	0.546316	0
circRNA003976	1:180825238-180828351,-	ENSSSCG00000004929	0	0	0.546316	0
circRNA003978	1:180982416-180998696,-	ENSSSCG00000004931	0.421029	3.34729	4.55234	3.04144
circRNA003980	1:181031655-181033165,-	ENSSSCG00000004934	0	0	0	0.950318
circRNA003985	1:181050308-181059423,-	ENSSSCG00000004934	0	0	0	0.950318
circRNA003987	1:181051818-181055410,-	ENSSSCG00000004934	0	0	1.82105	0.570191
circRNA003992	1:181055348-181068076,-	ENSSSCG00000004934	0	0	0.364211	0
circRNA003996	1:181067902-181087185,-	ENSSSCG00000004934	0	0	0	0.570191
circRNA003998	1:181145446-181159028,-	ENSSSCG00000004936	0	0	0	0.760254
circRNA003999	1:181157214-181159028,-	ENSSSCG00000004936	0	0	0.728422	0.950318
circRNA004001	1:181157214-181169796,-	ENSSSCG00000004936	0	0	0.364211	0
circRNA004002	1:181161591-181165093,-	ENSSSCG00000004936	0	0	0.364211	0
circRNA004004	1:181330430-181330850,-	ENSSSCG00000004938	0	0	0	0.380127
circRNA004012	1:182114094-182120613,-	ENSSSCG00000004942	0	0	0	0.570191
circRNA004014	1:182114094-182123942,-	ENSSSCG00000004942	1.26335	0	0	0
circRNA004015	1:182228684-182229505,-	ENSSSCG00000004945	0	0	0.364211	0
circRNA004016	1:182228684-182229857,-	ENSSSCG00000004945	0	0	0.364211	0
circRNA004017	1:182252305-182253589,+	ENSSSCG00000004946	0	0	0	0.380127
circRNA004022	1:182856035-182884959,+	ENSSSCG00000004951	0	0	0.728422	0
circRNA004024	1:183810303-183822002,+	ENSSSCG00000004958	0	0	0.546316	0.570191
circRNA004025	1:183813972-183822002,+	ENSSSCG00000004958	0.421029	0	4.55234	4.56237
circRNA004026	1:183813972-183835431,+	ENSSSCG00000004958	0	0	6.91971	7.98394
circRNA004028	1:183813972-183851512,+	ENSSSCG00000004958	0	0	0.364211	0
circRNA004033	1:186656378-186657838,-	ENSSSCG00000004973	0	0	0.910527	0.570191
circRNA004037	1:188119161-188121283,-	ENSSSCG00000004979	0	0	1.09263	0
circRNA004042	1:188021787-188027071,+	ENSSSCG00000004980	0	0	0.728422	0
circRNA004047	1:188256959-188265251,-	ENSSSCG00000004983	0	1.25528	0	0
circRNA004050	1:188532965-188541257,+	ENSSSCG00000004988	0	0.627641	0	0
circRNA004055	1:195169048-195177620,+	ENSSSCG00000004997	0	0	0	0.380127
circRNA004056	1:195169048-195178170,+	ENSSSCG00000004997	0	0	0	1.71099
circRNA004058	1:195171264-195179852,+	ENSSSCG00000004997	0	0	0	0.570191
circRNA004061	1:195208520-195211514,+	ENSSSCG00000004999	0	0	0	0.380127
circRNA004066	1:199959800-199971098,-	ENSSSCG00000005011	0	0	0.546316	1.71099
circRNA004067	1:199962718-199971098,-	ENSSSCG00000005011	0	0	0	0.380127
circRNA004069	1:199966225-199971098,-	ENSSSCG00000005011	0	0	1.27474	2.28119
circRNA004073	1:200269188-200270003,-	ENSSSCG00000005015	0	0	0.364211	0
circRNA004075	1:200269188-200281803,-	ENSSSCG00000005015	0	0	0	1.71099
circRNA004081	1:200287461-200298109,-	ENSSSCG00000005015	0	0	0	1.33087
circRNA004082	1:200290312-200298109,-	ENSSSCG00000005015	0	3.76546	0	0
circRNA004085	1:200299008-200299664,-	ENSSSCG00000005015	0	0	0.546316	0
circRNA004088	1:200310791-200338610,-	ENSSSCG00000005015	1.26335	0	0	0
circRNA004090	1:200325281-200338610,-	ENSSSCG00000005015	0	0	0	1.71099
circRNA004091	1:200427413-200435305,-	ENSSSCG00000005018	0	0	0	0.950318
circRNA004095	1:200721529-200721973,-	ENSSSCG00000005021	0	0	0	0.380127
circRNA004100	1:200790737-200801042,-	ENSSSCG00000005022	0	0	0	1.71099
circRNA004102	1:200840059-200871554,-	ENSSSCG00000005022	0	0	0.364211	0
circRNA004106	1:201664902-201675876,+	ENSSSCG00000005027	0	0	0	0.380127
circRNA004108	1:201668387-201675876,+	ENSSSCG00000005027	0.421029	0	0	0.570191
circRNA004109	1:202012271-202016291,-	ENSSSCG00000005030	2.10568	0	4.18813	2.09112
circRNA004113	1:202609213-202611659,+	ENSSSCG00000005038	0	4.81165	0	0.760254
circRNA004115	1:202611389-202611659,+	ENSSSCG00000005038	0	0	0.364211	0
circRNA004117	1:202650919-202659321,+	ENSSSCG00000005039	0	0	0	0.380127
circRNA004118	1:202793117-202813336,-	ENSSSCG00000005041	0	1.88292	0.364211	0.760254
circRNA004119	1:202797720-202813336,-	ENSSSCG00000005041	0	0	0	0.570191
circRNA004120	1:202805858-202813336,-	ENSSSCG00000005041	3.15825	0	0.728422	1.33087
circRNA004123	1:202944044-202986161,-	ENSSSCG00000005043	0	0	1.27474	0.950318
circRNA004126	1:202954151-202986161,-	ENSSSCG00000005043	0	0	2.00316	7.22368
circRNA004127	1:202963752-202986161,-	ENSSSCG00000005043	0	0	0.546316	0
circRNA004129	1:202974506-202986161,-	ENSSSCG00000005043	0	0	0.546316	0.570191
circRNA004133	1:204797063-204798169,-	ENSSSCG00000005052	0	0	0.728422	0
circRNA004136	1:204835342-204836699,-	ENSSSCG00000005052	0	0	0	0.380127
circRNA004139	1:205261251-205275083,-	ENSSSCG00000005058	0	0	0.546316	0
circRNA004140	1:205265274-205267698,-	ENSSSCG00000005058	0	0	1.82105	0.380127
circRNA004143	1:205465514-205472192,+	ENSSSCG00000005060	0	0	0	1.33087
circRNA004144	1:205465514-205474960,+	ENSSSCG00000005060	0	0	0.910527	3.99218
circRNA004147	1:205472021-205474960,+	ENSSSCG00000005060	0	0	0.364211	0
circRNA004148	1:205472021-205484559,+	ENSSSCG00000005060	0	11.0877	0.546316	0
circRNA004151	1:205472021-205492135,+	ENSSSCG00000005060	0	0	0	2.85138
circRNA004152	1:205472021-205527875,+	ENSSSCG00000005060	2.10568	0	0	0
circRNA004156	1:208292448-208295366,+	ENSSSCG00000005073	0	0	0.364211	0
circRNA004157	1:208292448-208305105,+	ENSSSCG00000005073	0	0	1.63895	0.570191
circRNA004160	1:208307044-208315461,+	ENSSSCG00000005073	0	0	0	0.570191
circRNA004162	1:208343616-208349034,+	ENSSSCG00000005073	0	0	0.546316	1.14038
circRNA004164	1:208501652-208513821,+	ENSSSCG00000005076	0	0	0	0.950318
circRNA004165	1:209443501-209444335,-	ENSSSCG00000005078	0	11.9244	0	0
circRNA004175	1:210857649-210869228,+	ENSSSCG00000005090	0	4.81165	1.63895	2.66131
circRNA004176	1:211250071-211262362,+	ENSSSCG00000005092	0	0	0	0.380127
circRNA004177	1:211713355-211721306,+	ENSSSCG00000005095	0	0	0	0.570191
circRNA004182	1:211745760-211745915,+	ENSSSCG00000005095	0	0	0	0.380127
circRNA004183	1:212154209-212160381,+	ENSSSCG00000005096	1.26335	0	0.546316	0
circRNA004184	1:212169280-212175049,+	ENSSSCG00000005096	0	0	0.546316	0
circRNA004189	1:212991536-212994203,+	ENSSSCG00000005106	3.36903	0	0	0
circRNA004195	1:215838025-215852436,-	ENSSSCG00000005110	1.47387	0	0	0
circRNA004198	1:215885410-215895290,-	ENSSSCG00000005110	0	0	0.728422	0.760254
circRNA004200	1:215887679-215922646,-	ENSSSCG00000005110	0	0	0	0.760254
circRNA004202	1:215894872-215909111,-	ENSSSCG00000005110	0	3.76546	0	0
circRNA004203	1:215922460-215948141,-	ENSSSCG00000005110	0	0	0	0.380127
circRNA004204	1:215947922-215949369,-	ENSSSCG00000005110	0	0	1.45684	0
circRNA004206	1:215987388-215988521,-	ENSSSCG00000005110	0	2.51056	0.546316	0
circRNA004208	1:218540055-218549781,-	ENSSSCG00000005124	0	0	0.546316	0.380127
circRNA004209	1:218540055-218575722,-	ENSSSCG00000005124	0	0	0	0.380127
circRNA004210	1:218549683-218575722,-	ENSSSCG00000005124	0	0	0.364211	0.570191
circRNA004211	1:218551331-218575722,-	ENSSSCG00000005124	0	0	1.45684	0
circRNA004213	1:218647970-218652474,+	ENSSSCG00000005126	0	0	0.364211	0
circRNA004217	1:218683997-218686093,+	ENSSSCG00000005127	0	0	0.364211	1.33087
circRNA004219	1:222016016-222080892,+	ENSSSCG00000005130	0	0	0	0.380127
circRNA004220	1:222076705-222080892,+	ENSSSCG00000005130	0	6.4851	1.27474	0
circRNA004221	1:224091689-224111707,-	ENSSSCG00000005135	0	0	0.364211	0
circRNA004222	1:224091689-224114675,-	ENSSSCG00000005135	0	0	2.73158	0.380127
circRNA004223	1:226060683-226118520,+	ENSSSCG00000005166	0	0	0.364211	1.71099
circRNA004225	1:226117818-226118520,+	ENSSSCG00000005166	0	0	8.74076	14.0668
circRNA004227	1:226177878-226348087,+	ENSSSCG00000005166	0	0	0	0.760254
circRNA004239	1:227134785-227139614,-	ENSSSCG00000005170	3.15825	0	0	0
circRNA004252	1:227165197-227166326,-	ENSSSCG00000005170	0	3.1382	0	0
circRNA004253	1:227165197-227186649,-	ENSSSCG00000005170	1.47387	0	0	0.760254
circRNA004257	1:227181486-227186649,-	ENSSSCG00000005170	2.31619	9.62331	2.91369	2.09112
circRNA004258	1:227181486-227197323,-	ENSSSCG00000005170	0	0	1.45684	2.66131
circRNA004259	1:227181486-227210811,-	ENSSSCG00000005170	2.10568	8.99566	0	0.380127
circRNA004260	1:227185987-227188489,-	ENSSSCG00000005170	0	0	0.546316	0
circRNA004262	1:227185987-227194049,-	ENSSSCG00000005170	0	0	0	0.380127
circRNA004263	1:227185987-227197323,-	ENSSSCG00000005170	0	0	0	0.570191
circRNA004265	1:227188422-227197323,-	ENSSSCG00000005170	0	0	0	0.380127
circRNA004269	1:227369313-227386275,+	ENSSSCG00000005173	0	0	0.364211	0
circRNA004277	1:229131343-229214212,-	ENSSSCG00000005178	0	0	0	0.570191
circRNA004280	1:229186576-229246387,-	ENSSSCG00000005178	0	0	0	0.760254
circRNA004281	1:229214111-229246387,-	ENSSSCG00000005178	1.8949	0	1.63895	1.33087
circRNA004282	1:229214111-229296319,-	ENSSSCG00000005178	1.05284	0	1.45684	1.90106
circRNA004283	1:229214111-229321286,-	ENSSSCG00000005178	0	0	0.546316	0
circRNA004284	1:229233920-229246387,-	ENSSSCG00000005178	0	0	11.6545	8.74419
circRNA004285	1:229233920-229296319,-	ENSSSCG00000005178	0	4.81165	3.09579	2.66131
circRNA004287	1:229343178-229344099,-	ENSSSCG00000005178	0	0	1.09263	1.33087
circRNA004288	1:229343178-229362710,-	ENSSSCG00000005178	0	0	0.910527	1.71099
circRNA004289	JH118959.1:26077-28051,-	ENSSSCG00000005180	0	0	0	0.380127
circRNA004290	1:230999158-231003021,+	ENSSSCG00000005183	0	0	10.7439	11.4055
circRNA004291	1:230999158-231010023,+	ENSSSCG00000005183	0	8.78658	2.00316	4.9425
circRNA004293	1:231032078-231051989,-	ENSSSCG00000005184	0	0	0	0.760254
circRNA004304	1:232124771-232159897,+	ENSSSCG00000005190	0	0	0	0.380127
circRNA004305	1:232130636-232134297,+	ENSSSCG00000005190	0	0	0.364211	0
circRNA004310	1:233122152-233128786,+	ENSSSCG00000005191	0	0	0.546316	0
circRNA004316	1:233128639-233154197,+	ENSSSCG00000005191	0	0	0	0.950318
circRNA004318	1:233128639-233180602,+	ENSSSCG00000005191	0	0	1.27474	0
circRNA004320	1:233128639-233202671,+	ENSSSCG00000005191	0	0	0	0.570191
circRNA004322	1:233131897-233146457,+	ENSSSCG00000005191	0	0	0.364211	0
circRNA004323	1:233145795-233154197,+	ENSSSCG00000005191	0	0	0.364211	0
circRNA004326	1:233195417-233196805,+	ENSSSCG00000005191	0	0	0.728422	0
circRNA004338	1:240860922-240879186,-	ENSSSCG00000005198	0	0	0	0.570191
circRNA004343	1:241875288-241903294,+	ENSSSCG00000005205	24.8458	23.0121	30.2283	69.7647
circRNA004344	1:241875288-241916869,+	ENSSSCG00000005205	0	0	3.82422	4.56237
circRNA004345	1:241875288-241925272,+	ENSSSCG00000005205	0	0	1.09263	3.99218
circRNA004348	1:241901876-241903294,+	ENSSSCG00000005205	0	0	0.546316	0.570191
circRNA004349	1:241901876-241916869,+	ENSSSCG00000005205	0	0	0.728422	0
circRNA004350	1:241901876-241925272,+	ENSSSCG00000005205	0.631543	0	0	2.28119
circRNA004352	1:241941089-241946449,+	ENSSSCG00000005205	0	0	0	0.380127
circRNA004354	1:242065636-242066517,+	ENSSSCG00000005207	0	0	0	1.33087
circRNA004358	1:242084959-242088453,+	ENSSSCG00000005207	0	0	0	0.380127
circRNA004359	1:242087549-242088453,+	ENSSSCG00000005207	0	0	0.546316	0
circRNA004361	1:242142861-242143729,-	ENSSSCG00000005208	0	4.81165	0	0
circRNA004363	1:242153419-242206613,-	ENSSSCG00000005208	0	0	0.546316	0
circRNA004364	1:242160697-242167556,-	ENSSSCG00000005208	0	0	1.63895	0.570191
circRNA004368	1:242725330-242750357,-	ENSSSCG00000005215	0	0	0	0.950318
circRNA004369	1:242727957-242733870,-	ENSSSCG00000005215	0	0	0	0.760254
circRNA004371	1:242750211-242768784,-	ENSSSCG00000005215	1.26335	0	0	0.570191
circRNA004373	1:243876312-243952531,+	ENSSSCG00000005224	0.842325	0	0	0
circRNA004375	1:244821953-244830400,+	ENSSSCG00000005227	0	0	0	0.570191
circRNA004378	1:244830306-244837872,+	ENSSSCG00000005227	0	0	0	0.570191
circRNA004380	1:244832038-244849964,+	ENSSSCG00000005227	1.26335	2.09201	2.36737	1.52093
circRNA004382	1:245015946-245020769,-	ENSSSCG00000005229	0	0	0.728422	0
circRNA004385	1:245505756-245526429,-	ENSSSCG00000005232	0	0	2.54948	7.03362
circRNA004390	1:245565426-245575146,-	ENSSSCG00000005232	0	0	0	0.950318
circRNA004393	1:245565426-245595602,-	ENSSSCG00000005232	0	0	0	3.42157
circRNA004399	1:245574918-245656673,-	ENSSSCG00000005232	0.842325	0	0	0
circRNA004400	1:245581930-245595602,-	ENSSSCG00000005232	0	0	0	0.570191
circRNA004408	1:245635101-245640587,-	ENSSSCG00000005232	0	0	1.27474	0.380127
circRNA004409	1:245656289-245656673,-	ENSSSCG00000005232	0	0	0	0.570191
circRNA004412	1:247961313-247981752,+	ENSSSCG00000005243	0	0	0	0.380127
circRNA004413	1:247980560-247981752,+	ENSSSCG00000005243	0	0	0.364211	2.28119
circRNA004421	1:249459091-249479177,+	ENSSSCG00000005252	0	0	0.364211	0
circRNA004422	1:249459091-249488008,+	ENSSSCG00000005252	0	0	1.09263	0
circRNA004424	1:250436029-250505262,-	ENSSSCG00000005257	0	0	0.364211	0
circRNA004425	1:250481321-250505262,-	ENSSSCG00000005257	1.68438	0	0	0
circRNA004431	1:254747919-254749310,-	ENSSSCG00000005269	0	0	0	0.380127
circRNA004434	1:254766352-254782847,-	ENSSSCG00000005269	1.05284	0	0	0
circRNA004435	1:254769626-254789145,-	ENSSSCG00000005269	0	0	0	0.380127
circRNA004436	1:254773028-254789145,-	ENSSSCG00000005269	0	0	0.728422	0
circRNA004440	1:254965314-254982407,-	ENSSSCG00000005271	0	0	0	0.570191
circRNA004442	1:256330545-256346024,-	ENSSSCG00000005278	0	0	0.364211	0
circRNA004443	1:256337525-256346024,-	ENSSSCG00000005278	0	0	0.364211	0
circRNA004449	1:256850825-256879435,+	ENSSSCG00000005282	0	4.3931	0	0
circRNA004452	1:256867611-257001691,+	ENSSSCG00000005282	2.31619	0	0	0
circRNA004455	1:256994750-257001691,+	ENSSSCG00000005282	0	0	0	1.71099
circRNA004460	1:257015249-257040970,+	ENSSSCG00000005282	0	0	0	0.570191
circRNA004468	1:257754305-257762035,+	ENSSSCG00000005286	0	0	0.364211	0
circRNA004469	1:257754305-257765932,+	ENSSSCG00000005286	0	0	0	1.14038
circRNA004471	1:259253287-259379948,+	ENSSSCG00000005288	0	10.2509	0	0
circRNA004474	1:261826095-261831103,-	ENSSSCG00000005291	2.10568	0	0	0
circRNA004482	1:264034001-264042688,+	ENSSSCG00000005308	2.31619	0	0	0
circRNA004487	1:264044237-264044421,+	ENSSSCG00000005308	0	0	0	0.380127
circRNA004488	1:264044237-264044422,+	ENSSSCG00000005308	0	0	0	0.380127
circRNA004492	1:264195139-264196231,+	ENSSSCG00000005320	0	0	0.546316	0
circRNA004493	1:264881378-264891198,-	ENSSSCG00000005343	0	0	0.546316	0
circRNA004495	1:264888801-264896468,-	ENSSSCG00000005343	1.47387	0	0.728422	0
circRNA004496	1:264888801-264964723,-	ENSSSCG00000005343	0	0	0	0.380127
circRNA004497	1:264890622-264891198,-	ENSSSCG00000005343	1.26335	0	0.910527	0.380127
circRNA004498	1:264896300-264964723,-	ENSSSCG00000005343	0	0	0.728422	0
circRNA004499	1:264950261-264964723,-	ENSSSCG00000005343	0	0	0.546316	0
circRNA004500	1:264964529-264964723,-	ENSSSCG00000005343	0	0	0	0.380127
circRNA004501	1:265189346-265197520,+	ENSSSCG00000005344	1.68438	0	0	0
circRNA004502	1:265193648-265258214,+	ENSSSCG00000005344	0	0	0	0.570191
circRNA004506	1:266578996-266610386,+	ENSSSCG00000005356	0	0	0	0.380127
circRNA004508	1:267361613-267362923,+	ENSSSCG00000005364	0	0	0.728422	0.760254
circRNA004516	1:267671788-267690386,-	ENSSSCG00000005368	0	10.8786	0.728422	1.90106
circRNA004517	1:267674312-267684738,-	ENSSSCG00000005368	0	2.71965	0	0
circRNA004519	1:268060775-268074734,+	ENSSSCG00000005373	2.52671	0	0	0
circRNA004520	1:268060775-268079882,+	ENSSSCG00000005373	0	0	0	0.760254
circRNA004522	1:268200249-268208314,-	ENSSSCG00000005376	0	0	0	0.570191
circRNA004529	1:269120142-269131026,+	ENSSSCG00000005382	1.05284	2.09201	0	0.380127
circRNA004533	1:270106466-270137521,-	ENSSSCG00000005387	0	0	0	0.570191
circRNA004534	1:270324829-270347874,+	ENSSSCG00000005388	0.842325	0	0	0
circRNA004535	1:270324829-270368801,+	ENSSSCG00000005388	0	4.60257	0.364211	0
circRNA004537	1:270329794-270336118,+	ENSSSCG00000005388	0	0	0.364211	0.380127
circRNA004539	1:270329794-270347874,+	ENSSSCG00000005388	0	6.27602	1.09263	0
circRNA004540	1:270329794-270354137,+	ENSSSCG00000005388	0	0	1.27474	1.33087
circRNA004541	1:270329794-270368801,+	ENSSSCG00000005388	2.10568	0	4.55234	5.89282
circRNA004545	1:270335946-270368801,+	ENSSSCG00000005388	0	10.2509	0	0
circRNA004547	1:270342347-270354137,+	ENSSSCG00000005388	0	0	0	0.380127
circRNA004548	1:270342347-270368801,+	ENSSSCG00000005388	0	0	0.728422	0.760254
circRNA004550	1:270368514-270368801,+	ENSSSCG00000005388	0	0	1.27474	1.90106
circRNA004552	1:270464384-270476354,-	ENSSSCG00000005389	0	0	0	0.380127
circRNA004553	1:270471814-270473150,-	ENSSSCG00000005389	0	0	0.910527	0.570191
circRNA004554	1:270471814-270476354,-	ENSSSCG00000005389	1.68438	0	4.37023	6.08288
circRNA004555	1:270602783-270619968,+	ENSSSCG00000005391	0	0	4.73444	7.41375
circRNA004556	1:270602783-270641008,+	ENSSSCG00000005391	0	0	3.09579	6.65349
circRNA004557	1:270602783-270655882,+	ENSSSCG00000005391	0	0	0.728422	1.90106
circRNA004564	1:275780523-275806120,-	ENSSSCG00000005423	0	0	1.09263	0.570191
circRNA004565	1:275780523-275819743,-	ENSSSCG00000005423	0	0	0	0.380127
circRNA004566	1:275800352-275806120,-	ENSSSCG00000005423	0	0	3.64211	0
circRNA004567	1:275800352-275819743,-	ENSSSCG00000005423	0	0	0.728422	0
circRNA004572	1:276324106-276327273,+	ENSSSCG00000005425	0	0	0.546316	0
circRNA004573	1:276560954-276565315,+	ENSSSCG00000005427	0	0	0.546316	0
circRNA004580	1:278917339-278922241,+	ENSSSCG00000005436	1.8949	0	2.54948	4.9425
circRNA004582	1:278917339-278936634,+	ENSSSCG00000005436	0	0	3.46	6.27294
circRNA004583	1:278917339-278939621,+	ENSSSCG00000005436	0	1.25528	2.18527	3.04144
circRNA004585	1:278920981-278933715,+	ENSSSCG00000005436	0	0	0.364211	0
circRNA004586	1:278921972-278927376,+	ENSSSCG00000005436	0	0	0	1.33087
circRNA004588	1:278933587-278939621,+	ENSSSCG00000005436	0	0	0.364211	0.380127
circRNA004592	1:280490534-280493279,+	ENSSSCG00000005441	0	0	0.364211	0
circRNA004593	1:280497622-280502159,+	ENSSSCG00000005441	0	0	1.82105	2.28119
circRNA004594	1:280627975-280656034,-	ENSSSCG00000005444	0.421029	0	0.546316	2.09112
circRNA004595	1:280627975-280663228,-	ENSSSCG00000005444	0	1.88292	0	0
circRNA004598	1:280627975-280683970,-	ENSSSCG00000005444	1.26335	0	0.364211	0
circRNA004599	1:280627975-280700379,-	ENSSSCG00000005444	0	0	0	0.380127
circRNA004602	1:280648786-280663228,-	ENSSSCG00000005444	0	0	0.546316	0.950318
circRNA004603	1:280648786-280668925,-	ENSSSCG00000005444	0	0	0.364211	0
circRNA004606	1:280648786-280700379,-	ENSSSCG00000005444	0	0	0.728422	0
circRNA004610	1:280679417-280700379,-	ENSSSCG00000005444	0	0	0.728422	0.760254
circRNA004619	1:281094760-281109721,-	ENSSSCG00000005449	0	0	0	0.570191
circRNA004620	1:281712175-281719052,+	ENSSSCG00000005450	0	5.02074	0	0
circRNA004621	1:282128501-282144628,-	ENSSSCG00000005455	0	6.27602	0	0
circRNA004624	1:282147235-282150027,-	ENSSSCG00000005455	0	0	0.364211	0
circRNA004626	1:282172467-282180485,-	ENSSSCG00000005455	0	0	0	0.570191
circRNA004629	1:282190278-282195982,-	ENSSSCG00000005455	0	0	0	2.47125
circRNA004630	1:282201504-282217198,-	ENSSSCG00000005455	0	0	0.364211	0
circRNA004631	1:282205949-282206858,-	ENSSSCG00000005455	0	0	0.728422	0
circRNA004634	1:282274682-282278272,-	ENSSSCG00000005455	0	0	0.910527	0.570191
circRNA004641	1:283083059-283102825,-	ENSSSCG00000005459	0	0	0	0.380127
circRNA004642	1:283089949-283091675,-	ENSSSCG00000005459	0	0	0.364211	0
circRNA004644	1:283102746-283111472,-	ENSSSCG00000005459	0	0	5.28076	10.8353
circRNA004645	1:283106348-283111472,-	ENSSSCG00000005459	0	5.23021	0	0
circRNA004648	1:283680797-283712677,-	ENSSSCG00000005465	0	0	0.546316	0
circRNA004651	1:283781180-283786252,-	ENSSSCG00000005466	0	0	1.45684	0
circRNA004652	1:283798122-283800217,-	ENSSSCG00000005466	1.8949	0	4.18813	2.85138
circRNA004654	1:283798122-283824543,-	ENSSSCG00000005466	1.47387	0	0.364211	0
circRNA004655	1:283810272-283824543,-	ENSSSCG00000005466	0	8.57711	0	0
circRNA004657	1:283916127-283923677,+	ENSSSCG00000005467	0	0	0	0.380127
circRNA004658	1:283917881-283931595,+	ENSSSCG00000005467	0	0	0	0.760254
circRNA004660	1:284289000-284302182,+	ENSSSCG00000005471	0	0	0	0.570191
circRNA004665	1:284320473-284322778,+	ENSSSCG00000005471	0	0	2.18527	2.66131
circRNA004666	1:284320473-284341604,+	ENSSSCG00000005471	3.36903	0	2.73158	3.04144
circRNA004673	1:286228471-286233200,-	ENSSSCG00000005492	2.10568	0	0	0.950318
circRNA004675	1:287936885-287937948,+	ENSSSCG00000005498	0	0	0	0.950318
circRNA004676	1:287936885-287960703,+	ENSSSCG00000005498	0	0	1.09263	0.380127
circRNA004677	1:287936885-287987945,+	ENSSSCG00000005498	0	0	0	0.380127
circRNA004678	1:287973102-287987945,+	ENSSSCG00000005498	0	0	1.63895	1.14038
circRNA004679	1:288073704-288076848,+	ENSSSCG00000005498	0	0	0.364211	0
circRNA004685	1:293084018-293111323,-	ENSSSCG00000005512	0	0	0	0.380127
circRNA004691	1:293644473-293645189,-	ENSSSCG00000005518	0	0	0.728422	0
circRNA004713	1:299084618-299096616,+	ENSSSCG00000005589	0	0	0	0.570191
circRNA004717	1:299554716-299577014,-	ENSSSCG00000005598	0	0	0.546316	0
circRNA004719	1:299677409-299680822,-	ENSSSCG00000005599	0	0	1.27474	0
circRNA004723	1:299796548-299807974,+	ENSSSCG00000005602	0	0	0.364211	0
circRNA004724	1:299799481-299801634,+	ENSSSCG00000005602	0	0	0	0.950318
circRNA004726	1:299807813-299813040,+	ENSSSCG00000005602	0	0	0.728422	0
circRNA004730	1:299811724-299813040,+	ENSSSCG00000005602	0	0	0	0.950318
circRNA004733	1:299828753-299978323,+	ENSSSCG00000005602	0	3.1382	0	0
circRNA004734	1:300377340-300390846,+	ENSSSCG00000005604	0	0	0.364211	0
circRNA004735	1:300377340-300398288,+	ENSSSCG00000005604	1.68438	0	9.28708	11.7861
circRNA004736	1:300390655-300398288,+	ENSSSCG00000005604	1.8949	0	5.09865	3.99218
circRNA004737	1:301502545-301535195,+	ENSSSCG00000005607	0	0	0.364211	0
circRNA004744	1:302078699-302083259,+	ENSSSCG00000005617	0	0	0	0.950318
circRNA004748	1:302241389-302242886,-	ENSSSCG00000005625	0	0	0	0.760254
circRNA004750	1:302357015-302361935,-	ENSSSCG00000005631	0	0	0.364211	0
circRNA004751	1:302562082-302563263,+	ENSSSCG00000005636	0	0	0.728422	0
circRNA004752	1:302614888-302615852,-	ENSSSCG00000005640	0	0	0.546316	0.570191
circRNA004756	1:302902354-302909463,+	ENSSSCG00000005651	0	0	0	0.380127
circRNA004757	1:302929111-302930359,+	ENSSSCG00000005652	0	0	1.09263	0
circRNA004759	1:302931485-302932638,+	ENSSSCG00000005652	0	0	0	0.380127
circRNA004774	1:303289219-303292451,+	ENSSSCG00000005667	0	0	0	0.950318
circRNA004779	1:303952595-303955119,-	ENSSSCG00000005689	0	0	1.82105	1.71099
circRNA004780	1:303952595-303960495,-	ENSSSCG00000005689	0	0	0	0.760254
circRNA004786	1:303976519-304016621,-	ENSSSCG00000005689	0.631543	0	0	0
circRNA004788	1:303998761-304034811,-	ENSSSCG00000005689	0	4.60257	0.910527	1.14038
circRNA004789	1:304016473-304034811,-	ENSSSCG00000005689	0.631543	0	0.546316	0
circRNA004790	1:304797553-304798876,+	ENSSSCG00000005706	0.631543	0	3.46	0
circRNA004791	1:304797553-304807179,+	ENSSSCG00000005706	0	6.06693	1.09263	0
circRNA004793	1:304797553-304820843,+	ENSSSCG00000005706	0	0	0	1.33087
circRNA004796	1:304806906-304820843,+	ENSSSCG00000005706	0	0	0.364211	0
circRNA004801	1:304822633-304823214,+	ENSSSCG00000005706	0	0	0.364211	0
circRNA004802	1:305013962-305014452,+	ENSSSCG00000005710	0	0	0.546316	0
circRNA004804	1:305146368-305147698,+	ENSSSCG00000005711	0	0	0.728422	0
circRNA004806	1:305159092-305166335,+	ENSSSCG00000005711	0	0	0	0.380127
circRNA004810	1:305204958-305209542,+	ENSSSCG00000005711	0	0	0	1.71099
circRNA004812	1:305382059-305392639,+	ENSSSCG00000005715	0.421029	0	0.910527	0.570191
circRNA004814	1:305398141-305400936,+	ENSSSCG00000005715	0.631543	0	0	0.760254
circRNA004816	1:305400743-305406003,+	ENSSSCG00000005715	0	3.34729	0.364211	0
circRNA004817	1:305405687-305406003,+	ENSSSCG00000005715	0	0	0.364211	0
circRNA004818	1:305447180-305447437,+	ENSSSCG00000005716	0	2.92873	0	0
circRNA004819	1:305447180-305447444,+	ENSSSCG00000005716	0	0	0.728422	0
circRNA004823	1:305559422-305569960,-	ENSSSCG00000005719	7.58012	0	1.45684	2.28119
circRNA004825	1:305805421-305871131,-	ENSSSCG00000005720	0.421029	0	0.364211	0
circRNA004826	1:306160943-306186312,-	ENSSSCG00000005724	0	10.8786	0	0
circRNA004830	1:306174758-306186312,-	ENSSSCG00000005724	0	0	0.364211	0
circRNA004831	1:306176328-306197451,-	ENSSSCG00000005724	0	0	0	0.380127
circRNA004832	1:306181495-306186312,-	ENSSSCG00000005724	0	0	0.728422	0
circRNA004833	1:306181495-306197451,-	ENSSSCG00000005724	0	0	0.546316	2.85138
circRNA004834	1:306182167-306197451,-	ENSSSCG00000005724	0	0	0	0.950318
circRNA004835	1:306183313-306197451,-	ENSSSCG00000005724	0	0	0	1.14038
circRNA004838	1:306216979-306224018,-	ENSSSCG00000005724	0	0	0	0.380127
circRNA004842	1:306809215-306812867,-	ENSSSCG00000005733	0	0	0	0.570191
circRNA004846	1:307315008-307320696,-	ENSSSCG00000005743	0	7.74038	2.73158	1.71099
circRNA004847	1:307315008-307356626,-	ENSSSCG00000005743	0	3.34729	0	0
circRNA004848	1:307806102-307813485,-	ENSSSCG00000005750	0	0	0	0.380127
circRNA004855	1:314052725-314057452,+	ENSSSCG00000005855	0	0	0	0.950318
circRNA004856	1:314163633-314163947,-	ENSSSCG00000005859	1.26335	0	0	0
circRNA004857	4:218061-219006,+	ENSSSCG00000005893	0	0	1.63895	0
circRNA004858	4:385557-385858,-	ENSSSCG00000005899	0	0	0	0.570191
circRNA004862	4:1995099-1995728,+	ENSSSCG00000005930	2.31619	0	0.546316	2.28119
circRNA004865	4:2565800-2603013,+	ENSSSCG00000005934	0	0	0.364211	0
circRNA004867	4:2576283-2609139,+	ENSSSCG00000005934	0	0	0	0.380127
circRNA004871	4:2602891-2631285,+	ENSSSCG00000005934	7.15882	0.627641	4.55234	0.950318
circRNA004877	4:2625059-2631285,+	ENSSSCG00000005934	0	0	3.09579	1.14038
circRNA004893	4:7909968-7912265,+	ENSSSCG00000005944	0	0	0.728422	0
circRNA004896	4:8469595-8476262,-	ENSSSCG00000005950	0	0	0.364211	0
circRNA004897	4:8469595-8483581,-	ENSSSCG00000005950	0	0	0	1.33087
circRNA004899	4:8469595-8492146,-	ENSSSCG00000005950	0	0	0.546316	0.760254
circRNA004901	4:8482699-8492146,-	ENSSSCG00000005950	1.47387	0	0	0.380127
circRNA004903	4:8583523-8608563,+	ENSSSCG00000005952	0	0	0	0.760254
circRNA004905	4:10825872-10836946,+	ENSSSCG00000005959	0	0	0.546316	0
circRNA004906	4:10825872-10851780,+	ENSSSCG00000005959	0.631543	0	0	0
circRNA004909	4:15215394-15217662,+	ENSSSCG00000005969	0	0	0.364211	0
circRNA004910	4:15217342-15217662,+	ENSSSCG00000005969	2.31619	0	2.54948	0.570191
circRNA004918	4:15262357-15272443,-	ENSSSCG00000005970	0	0	0.364211	0
circRNA004921	4:15915882-15931051,+	ENSSSCG00000005977	0	0	5.28076	0
circRNA004922	4:16767206-16779552,+	ENSSSCG00000005983	0	0	0	0.950318
circRNA004924	4:16777416-16778684,+	ENSSSCG00000005983	0	0	1.27474	0
circRNA004927	4:16801582-16821577,+	ENSSSCG00000005983	0	0	0	0.570191
circRNA004931	4:17017421-17030866,+	ENSSSCG00000005987	0	0	0.364211	0
circRNA004935	4:19817846-19841332,-	ENSSSCG00000005997	0	0	0	0.570191
circRNA004936	4:19821064-19821541,-	ENSSSCG00000005997	0	0	1.63895	0
circRNA004937	4:19821064-19841332,-	ENSSSCG00000005997	0	0	0	0.760254
circRNA004939	4:19845212-19852793,-	ENSSSCG00000005997	0	0	0.364211	0
circRNA004940	4:19877061-19880715,-	ENSSSCG00000005997	0	0	0	0.570191
circRNA004941	4:19877061-19932911,-	ENSSSCG00000005997	0.842325	0	0	0
circRNA004942	4:20042956-20052708,-	ENSSSCG00000005998	2.10568	0	0.728422	0
circRNA004945	4:20050101-20052708,-	ENSSSCG00000005998	0	0	0	0.570191
circRNA004948	4:20119668-20121443,-	ENSSSCG00000005998	0	0	0.364211	1.14038
circRNA004949	4:20188601-20191216,+	ENSSSCG00000005999	0	0	0.546316	0
circRNA004951	4:20245337-20249094,+	ENSSSCG00000006000	0	0	0.364211	0
circRNA004952	4:20258272-20273742,+	ENSSSCG00000006000	0	0	0	0.380127
circRNA004965	4:30239674-30243647,-	ENSSSCG00000006024	0	0	0.546316	0
circRNA004967	4:31387168-31396823,-	ENSSSCG00000006032	0	8.78658	1.63895	3.04144
circRNA004968	4:31387168-31463369,-	ENSSSCG00000006032	0	0	9.10497	14.8275
circRNA004969	4:31389360-31463369,-	ENSSSCG00000006032	0	0	0.364211	0.950318
circRNA004970	4:31452928-31463369,-	ENSSSCG00000006032	0	0	2.18527	1.71099
circRNA004971	4:31688032-31689146,+	ENSSSCG00000006033	0	0	0	0.570191
circRNA004974	4:32646873-32699400,+	ENSSSCG00000006035	0.631543	0	0	0
circRNA004977	4:32672828-32699400,+	ENSSSCG00000006035	0	0	0.364211	0
circRNA004978	4:32672828-32715543,+	ENSSSCG00000006035	0	0	0	0.380127
circRNA004979	4:32690091-32715543,+	ENSSSCG00000006035	0	0	0.364211	0
circRNA004982	4:33418179-33460740,-	ENSSSCG00000006037	0.842325	0	0.728422	3.04144
circRNA004983	4:33422437-33460740,-	ENSSSCG00000006037	0	0	0	0.950318
circRNA004984	4:33431195-33460740,-	ENSSSCG00000006037	0	0	0.364211	0
circRNA004985	4:33438194-33460740,-	ENSSSCG00000006037	0	0	0	0.760254
circRNA004986	4:33450987-33460740,-	ENSSSCG00000006037	0	0	3.09579	1.14038
circRNA004988	4:34441657-34641574,-	ENSSSCG00000006038	0	0	0.910527	0.950318
circRNA004989	4:34502002-34617596,-	ENSSSCG00000006038	0	0	0.546316	0.380127
circRNA004990	4:34502002-34641574,-	ENSSSCG00000006038	0	0	1.63895	0.380127
circRNA004991	4:34617494-34641574,-	ENSSSCG00000006038	2.73722	0	27.8609	20.3402
circRNA005003	4:38240988-38241385,+	ENSSSCG00000006059	0	0	0	0.380127
circRNA005007	4:39264388-39276176,+	ENSSSCG00000006064	0	0	0.728422	0
circRNA005013	4:39632782-39642587,+	ENSSSCG00000006066	0	0	0	0.380127
circRNA005014	4:39637446-39642587,+	ENSSSCG00000006066	0	0	0.910527	0
circRNA005016	4:39915929-39943326,+	ENSSSCG00000006069	0	0	0	1.14038
circRNA005017	4:39929685-39943326,+	ENSSSCG00000006069	0	0	0.364211	0
circRNA005019	4:40098111-40105367,-	ENSSSCG00000006071	0	0	0	0.380127
circRNA005020	4:40153545-40154560,-	ENSSSCG00000006071	0	0	0.546316	0.380127
circRNA005022	4:41064760-41080514,+	ENSSSCG00000006074	0	0	0.364211	0
circRNA005023	4:41080385-41115480,+	ENSSSCG00000006074	0	0	0.364211	0
circRNA005025	4:41114626-41115480,+	ENSSSCG00000006074	2.31619	0	1.09263	2.28119
circRNA005026	4:41114626-41191106,+	ENSSSCG00000006074	0	0	0	1.14038
circRNA005027	4:41114626-41203285,+	ENSSSCG00000006074	0	0	2.73158	1.90106
circRNA005029	GL893107.2:152429-179297,+	ENSSSCG00000006077	0.631543	0	0	0
circRNA005030	4:41737281-41742058,-	ENSSSCG00000006082	0	0	0.364211	0
circRNA005032	4:42001868-42012095,-	ENSSSCG00000006083	15.5813	59.8318	29.1357	35.5478
circRNA005033	4:42001868-42030271,-	ENSSSCG00000006083	0	0	3.82422	4.75243
circRNA005034	4:42006514-42012095,-	ENSSSCG00000006083	3.79006	0	8.92287	8.36406
circRNA005035	4:42011531-42012095,-	ENSSSCG00000006083	3.15825	0	4.18813	0
circRNA005040	4:42126975-42131389,-	ENSSSCG00000006084	0	0	0.728422	0
circRNA005043	4:43494811-43509860,-	ENSSSCG00000006089	0	0	0	0.380127
circRNA005050	4:43514474-43518358,-	ENSSSCG00000006089	0	0	0.364211	0
circRNA005056	4:43558504-43572379,+	ENSSSCG00000006090	0	0	0.364211	0
circRNA005057	4:43558504-43574090,+	ENSSSCG00000006090	0.842325	6.4851	4.37023	2.66131
circRNA005059	4:44879892-44895258,-	ENSSSCG00000006093	2.52671	0	0	0
circRNA005062	4:45126550-45129506,+	ENSSSCG00000006095	0	0	0.364211	0
circRNA005066	4:45161671-45167199,-	ENSSSCG00000006096	0	0	0	0.380127
circRNA005067	4:45173707-45194119,-	ENSSSCG00000006096	0	2.92873	0	1.33087
circRNA005070	4:45547501-45556702,+	ENSSSCG00000006100	0	0	0.728422	0.950318
circRNA005072	4:45549558-45555416,+	ENSSSCG00000006100	0	0	0	0.380127
circRNA005073	4:45549558-45556702,+	ENSSSCG00000006100	0	0	0.728422	0.950318
circRNA005078	4:45567651-45583827,+	ENSSSCG00000006100	0	0	0	0.570191
circRNA005080	4:45572097-45573063,+	ENSSSCG00000006100	0	0	0.364211	0
circRNA005081	4:45576145-45595180,+	ENSSSCG00000006100	0	0	0	0.380127
circRNA005082	4:45693225-45707294,+	ENSSSCG00000006101	0	0	0	0.570191
circRNA005083	4:45885504-45886567,+	ENSSSCG00000006105	0	0	0	0.380127
circRNA005087	4:48110721-48140232,+	ENSSSCG00000006115	0	0	0	0.760254
circRNA005088	4:48117121-48134796,+	ENSSSCG00000006115	0	0	0	0.380127
circRNA005090	4:48122276-48140232,+	ENSSSCG00000006115	0	0	0	1.90106
circRNA005092	4:48134545-48140232,+	ENSSSCG00000006115	0	0	0.728422	0
circRNA005094	4:48139390-48140232,+	ENSSSCG00000006115	0	0	0.546316	1.90106
circRNA005095	4:48139390-48156272,+	ENSSSCG00000006115	0	0	0	0.570191
circRNA005096	4:48150335-48156272,+	ENSSSCG00000006115	0	0	1.82105	1.14038
circRNA005100	4:51225214-51229377,-	ENSSSCG00000006126	0	0	0.546316	0
circRNA005104	4:51268523-51271923,+	ENSSSCG00000006127	0	0	0	0.380127
circRNA005107	4:53450095-53468858,+	ENSSSCG00000006132	0	0	0	0.950318
circRNA005109	4:53450095-53515135,+	ENSSSCG00000006132	0	0	1.09263	0.380127
circRNA005112	4:53512857-53515135,+	ENSSSCG00000006132	0	0	0	0.760254
circRNA005115	4:55199067-55225326,-	ENSSSCG00000006135	1.47387	0	0	0
circRNA005116	4:55199067-55233036,-	ENSSSCG00000006135	0	0	0	0.570191
circRNA005118	4:55211974-55225326,-	ENSSSCG00000006135	1.47387	0	0	0
circRNA005119	4:55214191-55233036,-	ENSSSCG00000006135	0	0	0.910527	0
circRNA005122	4:55272746-55280061,+	ENSSSCG00000006136	0	3.55637	2.73158	2.09112
circRNA005123	4:55272746-55286785,+	ENSSSCG00000006136	0	0	0	3.80169
circRNA005126	4:55272746-55298110,+	ENSSSCG00000006136	0	0	1.27474	3.2315
circRNA005128	4:55278021-55298110,+	ENSSSCG00000006136	0	0	0	0.570191
circRNA005129	4:55279901-55298110,+	ENSSSCG00000006136	0	0	0	0.380127
circRNA005130	4:55310959-55324815,-	ENSSSCG00000006137	0.842325	0	0	0
circRNA005135	4:55318259-55335142,-	ENSSSCG00000006137	0	0	0	1.52093
circRNA005147	4:55349875-55364656,-	ENSSSCG00000006137	0	0	0.910527	1.90106
circRNA005149	4:55349875-55379564,-	ENSSSCG00000006137	0	0	0.364211	0
circRNA005150	4:55364471-55368458,-	ENSSSCG00000006137	0	0	0	0.570191
circRNA005151	4:55364471-55379564,-	ENSSSCG00000006137	0	0	1.63895	0.380127
circRNA005159	4:56554005-56571186,-	ENSSSCG00000006146	0	0	0	0.380127
circRNA005160	4:56568601-56584883,-	ENSSSCG00000006146	0	0	0.364211	0.950318
circRNA005164	4:61279290-61280179,+	ENSSSCG00000006155	6.52728	0	0.728422	2.66131
circRNA005165	4:61279290-61299593,+	ENSSSCG00000006155	0	0	0	0.380127
circRNA005168	4:62999229-63006996,-	ENSSSCG00000006162	0	0	0.546316	0.380127
circRNA005169	4:62999229-63009847,-	ENSSSCG00000006162	0	0	0.364211	0.380127
circRNA005178	4:68346799-68358603,-	ENSSSCG00000006184	0	0	0	0.570191
circRNA005184	4:70407822-70422678,+	ENSSSCG00000006193	0	0	0	1.71099
circRNA005185	4:70410830-70412608,+	ENSSSCG00000006193	0	0	0.546316	0
circRNA005186	4:70410830-70422011,+	ENSSSCG00000006193	0	0	0.546316	0.380127
circRNA005190	4:70732635-70742572,+	ENSSSCG00000006194	0	0	1.45684	3.80169
circRNA005192	4:70735281-70742572,+	ENSSSCG00000006194	0	5.85785	0.364211	0.570191
circRNA005193	4:70738379-70742572,+	ENSSSCG00000006194	0	0	2.91369	2.47125
circRNA005196	4:71280363-71287026,-	ENSSSCG00000006197	0	0	0	0.950318
circRNA005198	4:71284021-71287026,-	ENSSSCG00000006197	0	0	1.82105	4.37231
circRNA005199	4:71284021-71292193,-	ENSSSCG00000006197	0	0	0.364211	0
circRNA005200	4:71305685-71310422,-	ENSSSCG00000006197	0	0	0	0.570191
circRNA005201	4:71305685-71326280,-	ENSSSCG00000006197	0.631543	0	0	0
circRNA005202	4:71351182-71351789,-	ENSSSCG00000006197	0	0	0.364211	0
circRNA005203	4:72772833-72796823,-	ENSSSCG00000006199	4.21109	0	1.63895	0
circRNA005206	4:72820299-72837862,-	ENSSSCG00000006199	2.31619	0	0	0
circRNA005207	4:72820299-72854126,-	ENSSSCG00000006199	0	2.92873	0	0
circRNA005208	4:72832382-72854126,-	ENSSSCG00000006199	0	0	0.546316	0.570191
circRNA005213	4:72841252-72851593,-	ENSSSCG00000006199	0	0	0	0.760254
circRNA005218	4:72869740-72892322,-	ENSSSCG00000006199	0	0	0	0.760254
circRNA005220	4:72881553-72892322,-	ENSSSCG00000006199	0	0	0	0.380127
circRNA005221	4:72888224-72916827,-	ENSSSCG00000006199	0	0	0.364211	0
circRNA005223	4:73577489-73579762,+	ENSSSCG00000006201	0	6.4851	0	0
circRNA005227	4:73591601-73632062,+	ENSSSCG00000006201	0	0	0	1.14038
circRNA005231	4:73597911-73614069,+	ENSSSCG00000006201	2.10568	0	0	0
circRNA005232	4:73597911-73620974,+	ENSSSCG00000006201	0	0	0	0.950318
circRNA005233	4:73604268-73664404,+	ENSSSCG00000006201	0	0	0	0.380127
circRNA005235	4:73625932-73632062,+	ENSSSCG00000006201	0	0	0	0.380127
circRNA005238	4:73698968-73718330,-	ENSSSCG00000006202	0	0	0	0.570191
circRNA005240	4:73707539-73718330,-	ENSSSCG00000006202	0	0	0.546316	0.570191
circRNA005241	4:73707539-73732960,-	ENSSSCG00000006202	0	8.57711	0	0
circRNA005242	4:73714672-73718330,-	ENSSSCG00000006202	0.421029	0	4.73444	4.9425
circRNA005244	4:73721778-73738414,-	ENSSSCG00000006202	0.421029	0	0	0
circRNA005246	4:73730787-73738414,-	ENSSSCG00000006202	0	0	0	2.09112
circRNA005248	4:73759206-73761012,-	ENSSSCG00000006202	0	0	0	0.570191
circRNA005257	4:75094373-75105835,-	ENSSSCG00000006219	0	0	0	0.950318
circRNA005258	4:75094373-75116961,-	ENSSSCG00000006219	0	4.81165	1.45684	2.09112
circRNA005263	4:79034572-79035983,-	ENSSSCG00000006231	1.26335	0	1.45684	0.950318
circRNA005264	4:79034572-79039936,-	ENSSSCG00000006231	2.94774	0	0	0
circRNA005269	4:79089336-79101679,-	ENSSSCG00000006231	8.84347	0	3.2779	3.99218
circRNA005270	4:79089336-79115918,-	ENSSSCG00000006231	0	0	0.728422	1.33087
circRNA005271	4:79094979-79101679,-	ENSSSCG00000006231	0	0	4.91655	4.37231
circRNA005272	4:79094979-79115918,-	ENSSSCG00000006231	1.8949	0	0	0
circRNA005278	4:81206145-81225995,-	ENSSSCG00000006239	0	0	0	1.14038
circRNA005281	4:82891710-82898748,-	ENSSSCG00000006251	0	0	0.364211	0
circRNA005282	4:84304852-84326476,+	ENSSSCG00000006263	0.842325	0	0	0
circRNA005284	4:85304080-85304511,+	ENSSSCG00000006267	0	0	0.728422	2.28119
circRNA005285	4:85304080-85367540,+	ENSSSCG00000006267	2.31619	0	1.09263	4.75243
circRNA005289	4:87217722-87236370,+	ENSSSCG00000006274	0	0	0.364211	0
circRNA005291	4:87252616-87268841,+	ENSSSCG00000006274	0	0	0	0.380127
circRNA005292	4:87263342-87264024,+	ENSSSCG00000006274	0	4.60257	0	0
circRNA005295	4:87263342-87278911,+	ENSSSCG00000006274	0	0	0	0.760254
circRNA005296	4:87275773-87278911,+	ENSSSCG00000006274	0	0	0.364211	0
circRNA005300	4:87306269-87324546,+	ENSSSCG00000006274	1.05284	0	0	0
circRNA005301	4:87318495-87322078,+	ENSSSCG00000006274	0	0	0.728422	0
circRNA005304	4:87330246-87332668,+	ENSSSCG00000006274	0	0	2.00316	2.47125
circRNA005305	4:87543027-87545344,-	ENSSSCG00000006277	0.631543	7.74038	4.37023	5.89282
circRNA005315	4:88603966-88607994,+	ENSSSCG00000006282	0	7.94986	1.27474	0
circRNA005324	4:88669499-88671024,+	ENSSSCG00000006282	0	0	0	1.14038
circRNA005325	4:88766572-88789798,+	ENSSSCG00000006283	0	0	0	0.570191
circRNA005326	4:88783358-88796326,+	ENSSSCG00000006283	0.421029	0	0	0
circRNA005336	4:90453172-90459676,-	ENSSSCG00000006301	0.631543	0	0.728422	0
circRNA005341	4:90817451-90823622,+	ENSSSCG00000006305	0.421029	0	0	0
circRNA005342	4:90924839-90936640,-	ENSSSCG00000006306	0	0	0	0.380127
circRNA005345	4:90929683-90936640,-	ENSSSCG00000006306	1.26335	0	0.364211	0
circRNA005346	4:91010090-91013102,-	ENSSSCG00000006307	0	0	0.364211	0.570191
circRNA005350	4:91296468-91313767,-	ENSSSCG00000006310	0.421029	0	0	0
circRNA005365	4:93598991-93613358,-	ENSSSCG00000006331	0	0	0.910527	2.09112
circRNA005366	4:93598991-93622015,-	ENSSSCG00000006331	5.89547	20.9201	6.91971	13.6867
circRNA005367	4:93607962-93622015,-	ENSSSCG00000006331	0	0	0.364211	0.760254
circRNA005368	4:93613222-93622015,-	ENSSSCG00000006331	0	0	2.00316	0
circRNA005369	4:93621824-93622015,-	ENSSSCG00000006331	0	0	0.364211	0.380127
circRNA005374	4:96740133-96749299,-	ENSSSCG00000006346	0	0	0.364211	0
circRNA005378	4:96757138-96803170,-	ENSSSCG00000006346	0	0	0	0.380127
circRNA005380	4:96774977-96803170,-	ENSSSCG00000006346	0	0	0.728422	0
circRNA005381	4:96801839-96803170,-	ENSSSCG00000006346	0	0	0	0.380127
circRNA005386	4:97119643-97119861,+	ENSSSCG00000006359	0	0	0.364211	0
circRNA005387	4:97138914-97140076,+	ENSSSCG00000006360	0	0	0	0.570191
circRNA005388	4:98013105-98017299,-	ENSSSCG00000006385	0.842325	0	0	0
circRNA005391	4:98051659-98053981,+	ENSSSCG00000006386	0	6.4851	3.64211	3.2315
circRNA005392	4:98051659-98055613,+	ENSSSCG00000006386	0	0	1.63895	0
circRNA005393	4:98051659-98061929,+	ENSSSCG00000006386	0	0	2.91369	0
circRNA005394	4:98051659-98065430,+	ENSSSCG00000006386	0	0	0	0.570191
circRNA005395	4:98051659-98071965,+	ENSSSCG00000006386	0	0	0.546316	0
circRNA005396	4:98120654-98128385,+	ENSSSCG00000006388	0	0	0.910527	0
circRNA005398	4:98125119-98128385,+	ENSSSCG00000006388	1.26335	8.57711	2.91369	2.66131
circRNA005400	4:98128290-98143200,+	ENSSSCG00000006388	0	0	0.910527	0
circRNA005404	4:98306907-98307275,-	ENSSSCG00000006391	2.10568	0	3.09579	1.14038
circRNA005405	4:98616994-98618234,-	ENSSSCG00000006395	0	0	0	0.760254
circRNA005406	4:99380283-99389083,-	ENSSSCG00000006418	0.842325	0	0	0
circRNA005407	4:100521310-100526044,-	ENSSSCG00000006453	0	0	0	0.570191
circRNA005409	4:101685536-101698797,+	ENSSSCG00000006461	0	0	0	0.380127
circRNA005417	4:101921358-101921625,+	ENSSSCG00000006468	0	0	0.364211	0
circRNA005418	4:102166422-102169673,+	ENSSSCG00000006475	0	0	0.546316	0
circRNA005419	4:102437790-102447488,+	ENSSSCG00000006487	0	0	0	0.760254
circRNA005420	4:102444967-102447488,+	ENSSSCG00000006487	2.31619	0	0.728422	0.380127
circRNA005421	4:102444967-102449406,+	ENSSSCG00000006487	0	7.74038	0.364211	0.570191
circRNA005422	4:102444967-102450907,+	ENSSSCG00000006487	0	0	0.546316	0.760254
circRNA005427	4:102845825-102850042,+	ENSSSCG00000006504	0	0	0.364211	0
circRNA005428	4:102857486-102858115,+	ENSSSCG00000006504	0	0	0.364211	0
circRNA005432	4:103140713-103161473,+	ENSSSCG00000006508	0	0	0	1.52093
circRNA005435	4:103161371-103183939,+	ENSSSCG00000006508	0.842325	3.97493	0.364211	0.760254
circRNA005438	4:103183197-103183939,+	ENSSSCG00000006508	0	2.92873	0.546316	1.52093
circRNA005439	4:103183197-103198356,+	ENSSSCG00000006508	0	0	0.546316	0
circRNA005441	4:103198176-103209792,+	ENSSSCG00000006508	0	2.92873	2.00316	2.66131
circRNA005442	4:103198176-103230166,+	ENSSSCG00000006508	0.421029	3.34729	0.910527	1.52093
circRNA005443	4:103198176-103238159,+	ENSSSCG00000006508	0	0	0.546316	0.380127
circRNA005448	4:103237683-103238159,+	ENSSSCG00000006508	0	0	0.364211	0.950318
circRNA005449	4:103237683-103251183,+	ENSSSCG00000006508	0	0	0	0.570191
circRNA005450	4:103237683-103255448,+	ENSSSCG00000006508	0.631543	0	0.910527	0
circRNA005451	4:103237683-103259959,+	ENSSSCG00000006508	0	3.34729	0	0
circRNA005452	4:103255290-103267113,+	ENSSSCG00000006508	0	0	0	0.380127
circRNA005453	4:103267689-103268112,+	ENSSSCG00000006508	0	0	0.546316	0
circRNA005454	4:103267689-103273573,+	ENSSSCG00000006508	0.842325	0	0.728422	0
circRNA005455	4:103384378-103384842,+	ENSSSCG00000006522	0	1.0462	1.09263	2.47125
circRNA005458	4:104224058-104226162,+	ENSSSCG00000006549	0	0	0	0.760254
circRNA005461	4:104429621-104432656,-	ENSSSCG00000006553	0	0	0	0.570191
circRNA005462	4:104473252-104478066,+	ENSSSCG00000006556	0	0	0.364211	1.33087
circRNA005463	4:104599281-104599621,-	ENSSSCG00000006558	0	0	0	0.570191
circRNA005469	4:104755363-104756376,+	ENSSSCG00000006562	0	10.2509	0	1.52093
circRNA005470	4:104641591-104642182,+	ENSSSCG00000006567	0	0	0	0.570191
circRNA005472	4:104659680-104659923,+	ENSSSCG00000006568	0	19.2466	18.5742	9.885
circRNA005473	4:104659680-104659924,+	ENSSSCG00000006568	0	8.15894	2.91369	0
circRNA005474	4:104659680-104659925,+	ENSSSCG00000006568	0	0	1.09263	0
circRNA005476	4:104659680-104659928,+	ENSSSCG00000006568	0	0	1.27474	0
circRNA005479	4:104804175-104804339,-	ENSSSCG00000006571	0	0	0.364211	0
[truncated: 5,602 more rows]
