# Supplementary material for: Dynamic Changes of DNA Methylation and Transcriptome Expression in Porcine Ovaries during Aging
Source: Biomed Res Int. 2019 Oct 30;2019:8732023. doi: 10.1155/2019/8732023 (PMC6874880; doi:10.1155/2019/8732023)
Supplement: Supplementary Materials — Table S1: primer sequences for q-PCR. Table S2: summary of sequence data and read-alignment statistics. Table S3: percentage of cytosine methylation after extraction. Table S4: association analysis of regulated genes between both ovarian development stages. Table S5: overlap between different methylation regions and differentially expressed genes. Figure S1: DNA methylation levels of CpG CHG and CHH on each chromosome. Figure S2: Pearson's correlation between DNA methylation level and chromosomal features. (A) Scatter plot and trend line (Pearson's correlation), indicating the correlation between the chromosome length and methylation level. (B) Scatter plot and trend line (Pearson's correlation), indicating the correlation between the chromosome GC content and methylation level. (C) Scatter plot and trend line (Pearson's correlation), indicating the correlation between the gene number in chromosome and methylation. (D) Scatter plot and trend line (Pearson's correlation), indicating the correlation between the chromosome CGI ratio and methylation level. (E) Scatter plot and trend line (Pearson's correlation), indicating the correlation between the chromosome repeat number and methylation level. Figure S3: verification of whole genome bisulfite and RNA sequencing data. (A) DNA methylation was verified via bisulfite sequencing PCR. The expression levels of mRNAs (B), miRNAs (C), lncRNAs (D), and circRNAs (E) were verified via q-PCR and adjusted by three endogenous control genes (porcine GAPDH, ACTB, and U6 snRNA). Figure S4: DNA methylation levels and RNA expression levels on each chromosome. Supplementary Database S1: summary and function enrichment of different methylation regions. Supplementary Database S2: identified mRNAs, miRNAs, lncRNAs, and circRNAs in all samples. Supplementary Database S3: differentially expressed mRNAs, miRNAs, lncRNAs, and circRNAs between both stages. Supplementary Database S4: GO analysis of differentially expressed RNAs and function over [file 8732023.f1.zip › 8732023.f1/Supplementary Database 3.xls]

## Sheet: DE mRNA
Different Expressed mRNA of two stages
mRNA ID	Type	logFC	logCPM	p-value	FDR	up-expression ↑down-expression ↓
ENSSSCG00000000001	protein_coding	4.37899	1.02027	0.0200295	0.355914	↑
ENSSSCG00000000010	protein_coding	3.19666	8.52088	8.77092e-06	0.00322803	↑
ENSSSCG00000000020	protein_coding	6.96619	-1.42836	0.0367036	0.457192	↑
ENSSSCG00000000021	protein_coding	4.68463	0.0532254	0.0282415	0.414901	↑
ENSSSCG00000000022	protein_coding	2.24642	3.31297	0.00657695	0.195927	↑
ENSSSCG00000000023	protein_coding	5.95521	-0.0103501	0.0104333	0.254915	↑
ENSSSCG00000000033	protein_coding	3.87512	4.16419	1.89622e-06	0.00122517	↑
ENSSSCG00000000067	protein_coding	7.42524	-1.05626	0.0219212	0.368887	↑
ENSSSCG00000000075	protein_coding	3.80831	3.7004	7.08259e-06	0.00274568	↑
ENSSSCG00000000076	protein_coding	1.26866	4.54236	0.0491905	0.506637	↑
ENSSSCG00000000082	protein_coding	1.81369	4.18752	0.00628048	0.189818	↑
ENSSSCG00000000087	protein_coding	1.38834	5.54372	0.0315325	0.432865	↑
ENSSSCG00000000090	protein_coding	2.37108	3.19824	0.00675079	0.198921	↑
ENSSSCG00000000134	protein_coding	2.05008	3.05701	0.0229479	0.378023	↑
ENSSSCG00000000146	protein_coding	1.64574	8.06822	0.0242002	0.387457	↑
ENSSSCG00000000148	protein_coding	2.87172	4.03577	0.0111752	0.265239	↑
ENSSSCG00000000179	protein_coding	2.65402	1.93804	0.0433564	0.484759	↑
ENSSSCG00000000209	protein_coding	1.67673	3.67002	0.0301509	0.426795	↑
ENSSSCG00000000242	protein_coding	7.46277	-1.02737	0.0209711	0.362505	↑
ENSSSCG00000000252	protein_coding	2.32716	4.86286	0.00427197	0.155121	↑
ENSSSCG00000000253	protein_coding	7.18866	1.91251	0.000699705	0.0521639	↑
ENSSSCG00000000254	protein_coding	2.57791	3.29652	0.0112317	0.266115	↑
ENSSSCG00000000261	protein_coding	4.80903	4.22369	1.80708e-09	8.75679e-06	↑
ENSSSCG00000000263	protein_coding	2.05129	5.40765	0.00292305	0.124641	↑
ENSSSCG00000000396	protein_coding	2.12525	8.01436	0.0305365	0.429327	↑
ENSSSCG00000000429	protein_coding	4.89448	-0.193787	0.0294545	0.422518	↑
ENSSSCG00000000435	protein_coding	1.59097	6.67725	0.0239984	0.386139	↑
ENSSSCG00000000449	protein_coding	1.6359	5.74563	0.0248282	0.391901	↑
ENSSSCG00000000455	protein_coding	1.29854	4.60107	0.0388561	0.467545	↑
ENSSSCG00000000491	protein_coding	4.9044	0.749283	0.0130504	0.28637	↑
ENSSSCG00000000501	protein_coding	6.92412	-1.44833	0.0424926	0.48231	↑
ENSSSCG00000000516	protein_coding	4.1445	0.328359	0.0276661	0.411033	↑
ENSSSCG00000000566	protein_coding	1.61881	3.57649	0.0437072	0.486012	↑
ENSSSCG00000000661	protein_coding	1.9023	3.81559	0.00853675	0.226046	↑
ENSSSCG00000000675	protein_coding	2.01526	8.54927	0.0127814	0.284724	↑
ENSSSCG00000000681	protein_coding	2.10453	5.62192	0.00121117	0.0715748	↑
ENSSSCG00000000710	protein_coding	7.59806	-0.899225	0.020001	0.355914	↑
ENSSSCG00000000721	protein_coding	7.46724	-1.02031	0.0210514	0.363246	↑
ENSSSCG00000000774	protein_coding	4.9826	6.44695	0.000119014	0.0173948	↑
ENSSSCG00000000795	protein_coding	3.04319	2.97578	0.0371619	0.459779	↑
ENSSSCG00000000807	protein_coding	1.74345	4.51621	0.00540397	0.175162	↑
ENSSSCG00000000809	protein_coding	1.42131	3.90502	0.0445172	0.488983	↑
ENSSSCG00000000873	protein_coding	1.8616	6.57086	0.0141899	0.298605	↑
ENSSSCG00000000933	protein_coding	6.9627	-1.4339	0.0378868	0.464485	↑
ENSSSCG00000000943	protein_coding	7.23298	-1.20917	0.0280563	0.414046	↑
ENSSSCG00000000964	protein_coding	2.38405	5.97934	0.000614491	0.0474588	↑
ENSSSCG00000000965	protein_coding	1.27795	5.37438	0.0437127	0.486012	↑
ENSSSCG00000000967	protein_coding	10.4167	1.71106	0.000183769	0.0226401	↑
ENSSSCG00000000968	protein_coding	2.15468	6.15509	0.00111404	0.0678923	↑
ENSSSCG00000000970	protein_coding	2.75256	6.13963	0.000134965	0.0190094	↑
ENSSSCG00000000972	protein_coding	1.75546	5.12977	0.00632128	0.190457	↑
ENSSSCG00000000973	protein_coding	2.67119	3.98406	0.000372287	0.0357235	↑
ENSSSCG00000000974	protein_coding	2.09963	4.22006	0.00737249	0.208333	↑
ENSSSCG00000000980	protein_coding	2.52173	3.53088	0.00120026	0.0710744	↑
ENSSSCG00000000981	protein_coding	2.19355	4.87886	0.000829514	0.0583974	↑
ENSSSCG00000000997	protein_coding	7.16909	-1.2732	0.0302363	0.426864	↑
ENSSSCG00000001005	protein_coding	2.04186	3.42758	0.0218494	0.368274	↑
ENSSSCG00000001006	protein_coding	2.77777	5.02591	2.13419e-05	0.00620517	↑
ENSSSCG00000001010	protein_coding	2.17327	5.9663	0.00102058	0.0642281	↑
ENSSSCG00000001025	protein_coding	1.94214	4.21576	0.0160331	0.319508	↑
ENSSSCG00000001065	protein_coding	1.81877	3.45798	0.0222768	0.370939	↑
ENSSSCG00000001085	protein_coding	3.03636	2.05318	0.0264735	0.403628	↑
ENSSSCG00000001216	protein_coding	8.42355	-0.181099	0.0054373	0.175655	↑
ENSSSCG00000001229	protein_coding	2.07436	10.1232	0.0289965	0.419439	↑
ENSSSCG00000001233	protein_coding	2.47784	5.93283	0.00504153	0.168679	↑
ENSSSCG00000001244	protein_coding	8.42085	-0.17327	0.00808522	0.219976	↑
ENSSSCG00000001341	protein_coding	1.94313	8.95577	0.049261	0.506637	↑
ENSSSCG00000001344	protein_coding	2.29817	2.73622	0.0262154	0.401371	↑
ENSSSCG00000001391	protein_coding	1.67392	3.67045	0.0251517	0.3938	↑
ENSSSCG00000001394	protein_coding	2.02809	5.71167	0.020398	0.357891	↑
ENSSSCG00000001402	protein_coding	1.41421	5.03521	0.0234443	0.382793	↑
ENSSSCG00000001409	protein_coding	1.40077	7.09967	0.0426826	0.48231	↑
ENSSSCG00000001420	protein_coding	1.26303	6.05195	0.047268	0.499207	↑
ENSSSCG00000001499	protein_coding	1.36663	8.97763	0.0443707	0.488246	↑
ENSSSCG00000001507	protein_coding	1.6544	4.35065	0.0101565	0.252177	↑
ENSSSCG00000001509	protein_coding	1.98613	6.2629	0.0122281	0.27711	↑
ENSSSCG00000001520	protein_coding	1.60817	4.87775	0.0114234	0.269102	↑
ENSSSCG00000001534	protein_coding	1.74526	5.22456	0.00860854	0.227126	↑
ENSSSCG00000001544	protein_coding	1.38932	3.84379	0.0484859	0.503728	↑
ENSSSCG00000001549	protein_coding	1.46294	5.56917	0.0232318	0.380568	↑
ENSSSCG00000001561	protein_coding	5.25989	5.31566	0.000494962	0.0415925	↑
ENSSSCG00000001565	protein_coding	8.03243	-0.562615	0.048214	0.502806	↑
ENSSSCG00000001596	protein_coding	1.61142	3.5092	0.0474528	0.500069	↑
ENSSSCG00000001598	protein_coding	3.27691	2.37611	0.00735468	0.208299	↑
ENSSSCG00000001616	protein_coding	8.56865	-0.0408362	0.00540051	0.175162	↑
ENSSSCG00000001619	protein_coding	1.90346	4.72304	0.00299581	0.126603	↑
ENSSSCG00000001680	protein_coding	2.4948	3.75677	0.000654427	0.0499345	↑
ENSSSCG00000001705	protein_coding	9.33738	0.67835	0.00921147	0.236175	↑
ENSSSCG00000001778	protein_coding	5.30521	0.21135	0.0254052	0.394765	↑
ENSSSCG00000001791	protein_coding	8.82822	0.201062	0.00525604	0.173059	↑
ENSSSCG00000001807	protein_coding	6.42096	0.409233	0.00327746	0.134404	↑
ENSSSCG00000001840	protein_coding	2.59952	5.03557	0.00104793	0.0651035	↑
ENSSSCG00000001849	protein_coding	2.46446	4.00154	0.00216569	0.104597	↑
ENSSSCG00000001872	protein_coding	3.42978	1.68293	0.0127726	0.284724	↑
ENSSSCG00000001873	protein_coding	2.29955	4.83549	0.000368976	0.0355231	↑
ENSSSCG00000001885	protein_coding	1.59955	4.63164	0.0110427	0.263384	↑
ENSSSCG00000001910	protein_coding	1.57684	7.60029	0.018929	0.349085	↑
ENSSSCG00000001912	protein_coding	3.90023	5.60147	5.32168e-05	0.0105952	↑
ENSSSCG00000001913	protein_coding	2.01517	4.33476	0.00761764	0.212418	↑
ENSSSCG00000001914	protein_coding	2.12199	4.82309	0.000817251	0.0579212	↑
ENSSSCG00000001963	protein_coding	1.42799	4.43513	0.0405871	0.473093	↑
ENSSSCG00000002002	protein_coding	2.38857	6.67653	0.00679273	0.199292	↑
ENSSSCG00000002007	protein_coding	7.62875	-0.890456	0.0172052	0.33181	↑
ENSSSCG00000002026	protein_coding	4.17469	3.53004	0.000323911	0.0322525	↑
ENSSSCG00000002267	protein_coding	2.3899	4.26066	0.00107192	0.0661698	↑
ENSSSCG00000002274	protein_coding	1.37522	7.84048	0.037586	0.46286	↑
ENSSSCG00000002280	protein_coding	3.1862	2.50753	0.00593238	0.183885	↑
ENSSSCG00000002317	protein_coding	7.24637	-1.20615	0.0271241	0.408352	↑
ENSSSCG00000002341	protein_coding	2.93533	4.80386	1.04803e-05	0.00369193	↑
ENSSSCG00000002350	protein_coding	2.36454	4.20131	0.000977668	0.0630083	↑
ENSSSCG00000002361	protein_coding	7.86374	-0.684873	0.0128862	0.285135	↑
ENSSSCG00000002368	protein_coding	1.43443	4.94178	0.0230994	0.379444	↑
ENSSSCG00000002383	protein_coding	2.16693	7.61213	0.00641885	0.191807	↑
ENSSSCG00000002392	protein_coding	1.83649	4.35117	0.00515812	0.170767	↑
ENSSSCG00000002440	protein_coding	1.69865	3.30316	0.0426876	0.48231	↑
ENSSSCG00000002450	protein_coding	7.58923	-0.926566	0.0181701	0.340691	↑
ENSSSCG00000002451	protein_coding	2.88135	4.1249	3.15082e-05	0.00782993	↑
ENSSSCG00000002459	protein_coding	1.60247	3.27145	0.047519	0.500586	↑
ENSSSCG00000002467	protein_coding	2.73822	1.76039	0.0406244	0.473093	↑
ENSSSCG00000002471	protein_coding	4.31987	8.72024	0.000237386	0.0269609	↑
ENSSSCG00000002504	protein_coding	5.18233	2.63634	0.0024646	0.112712	↑
ENSSSCG00000002515	protein_coding	4.60359	0.0997218	0.0365361	0.457192	↑
ENSSSCG00000002531	protein_coding	4.66136	1.77228	0.00620373	0.188085	↑
ENSSSCG00000002539	protein_coding	2.01259	3.92396	0.00357012	0.141805	↑
ENSSSCG00000002545	protein_coding	2.74348	4.28439	0.00061217	0.0474588	↑
ENSSSCG00000002551	protein_coding	2.243	2.76172	0.0341638	0.444463	↑
ENSSSCG00000002554	protein_coding	4.72385	2.19389	0.00221641	0.106545	↑
ENSSSCG00000002557	protein_coding	4.82674	0.681052	0.0171694	0.331475	↑
ENSSSCG00000002558	protein_coding	3.66886	2.55657	0.00341746	0.137812	↑
ENSSSCG00000002559	protein_coding	7.37957	-1.09702	0.0236961	0.383879	↑
ENSSSCG00000002619	protein_coding	8.82325	0.186395	0.00222886	0.106577	↑
ENSSSCG00000002633	protein_coding	2.2505	4.81271	0.000391053	0.0367957	↑
ENSSSCG00000002635	protein_coding	2.88234	3.70265	0.00239142	0.110894	↑
ENSSSCG00000002640	protein_coding	1.5217	4.26896	0.0236414	0.383793	↑
ENSSSCG00000002645	protein_coding	1.97121	4.06712	0.00379573	0.146257	↑
ENSSSCG00000002652	protein_coding	1.92903	4.42566	0.020757	0.360406	↑
ENSSSCG00000002656	protein_coding	3.1682	3.42657	0.000432446	0.0391694	↑
ENSSSCG00000002668	protein_coding	8.92977	0.295761	0.00539622	0.175162	↑
ENSSSCG00000002669	protein_coding	2.48832	7.10101	0.000263632	0.0286011	↑
ENSSSCG00000002672	protein_coding	2.65349	2.24318	0.0238736	0.385197	↑
ENSSSCG00000002675	protein_coding	4.91175	2.47871	0.00118897	0.0706936	↑
ENSSSCG00000002694	protein_coding	7.40209	-1.09389	0.0258429	0.398823	↑
ENSSSCG00000002719	protein_coding	8.49162	-0.115645	0.00501357	0.168131	↑
ENSSSCG00000002726	protein_coding	2.20443	3.86313	0.00275182	0.120794	↑
ENSSSCG00000002742	protein_coding	1.54859	4.28603	0.0473579	0.499794	↑
ENSSSCG00000002748	protein_coding	1.70025	3.54448	0.0307367	0.429522	↑
ENSSSCG00000002752	protein_coding	1.38408	4.0495	0.0420654	0.480193	↑
ENSSSCG00000002852	protein_coding	1.51274	3.59489	0.0392134	0.469383	↑
ENSSSCG00000002863	protein_coding	2.59783	3.85115	0.0002686	0.0288474	↑
ENSSSCG00000002867	protein_coding	1.62966	3.79136	0.0196442	0.353972	↑
ENSSSCG00000002889	protein_coding	3.56983	4.21854	0.00292364	0.124641	↑
ENSSSCG00000002957	protein_coding	3.95316	0.662914	0.0413608	0.475744	↑
ENSSSCG00000002969	protein_coding	6.83097	-1.52199	0.0449551	0.490718	↑
ENSSSCG00000002972	protein_coding	2.38767	2.25528	0.0325211	0.439179	↑
ENSSSCG00000002981	protein_coding	8.93396	5.45132	2.89601e-05	0.00732186	↑
ENSSSCG00000002996	protein_coding	1.4547	4.68193	0.0238489	0.385013	↑
ENSSSCG00000003006	protein_coding	3.38694	3.18059	0.000863858	0.0597043	↑
ENSSSCG00000003016	protein_coding	1.40296	4.07036	0.0331171	0.441688	↑
ENSSSCG00000003021	protein_coding	1.54196	5.59227	0.0177486	0.338165	↑
ENSSSCG00000003030	protein_coding	1.75637	5.21547	0.010058	0.250374	↑
ENSSSCG00000003040	protein_coding	1.28716	4.42181	0.0451506	0.490718	↑
ENSSSCG00000003046	protein_coding	1.66154	7.0534	0.0159083	0.318769	↑
ENSSSCG00000003053	protein_coding	5.93651	1.33241	0.025383	0.394765	↑
ENSSSCG00000003073	protein_coding	8.59912	-0.0440022	0.0274393	0.409946	↑
ENSSSCG00000003088	protein_coding	3.32733	7.14495	3.34823e-06	0.00158464	↑
ENSSSCG00000003091	protein_coding	1.34116	5.05837	0.0319635	0.436766	↑
ENSSSCG00000003092	protein_coding	7.30666	-1.14576	0.0275684	0.410165	↑
ENSSSCG00000003101	protein_coding	3.29821	2.12509	0.0121701	0.276442	↑
ENSSSCG00000003114	protein_coding	1.32276	5.48104	0.0386469	0.466553	↑
ENSSSCG00000003137	protein_coding	4.46791	6.96163	0.000155129	0.0206586	↑
ENSSSCG00000003145	protein_coding	7.03814	1.85069	0.00015141	0.0202869	↑
ENSSSCG00000003151	protein_coding	5.98005	0.0162608	0.0114746	0.269102	↑
ENSSSCG00000003167	protein_coding	3.16395	3.43074	0.00800324	0.219316	↑
ENSSSCG00000003168	protein_coding	1.26995	4.97847	0.0399774	0.471348	↑
ENSSSCG00000003172	protein_coding	6.72702	-1.60653	0.0471887	0.498732	↑
ENSSSCG00000003182	protein_coding	1.72591	4.52099	0.00870549	0.22844	↑
ENSSSCG00000003183	protein_coding	1.9302	3.76186	0.00876343	0.229134	↑
ENSSSCG00000003197	protein_coding	1.586	3.5799	0.0346169	0.447524	↑
ENSSSCG00000003201	protein_coding	2.37916	2.51508	0.0180484	0.340523	↑
ENSSSCG00000003208	protein_coding	6.70343	0.618659	0.00336649	0.136894	↑
ENSSSCG00000003216	protein_coding	3.14203	3.23233	0.000292942	0.030537	↑
ENSSSCG00000003217	protein_coding	2.15029	4.00864	0.00387264	0.147765	↑
ENSSSCG00000003238	protein_coding	2.2034	2.78678	0.0180878	0.340523	↑
ENSSSCG00000003253	protein_coding	2.01149	3.98644	0.013068	0.28654	↑
ENSSSCG00000003257	protein_coding	4.8394	-0.2888	0.0322506	0.438008	↑
ENSSSCG00000003262	protein_coding	1.7375	3.93501	0.0114657	0.269102	↑
ENSSSCG00000003263	protein_coding	1.25927	5.56118	0.0485172	0.503728	↑
ENSSSCG00000003289	protein_coding	1.90972	4.62561	0.00759278	0.212269	↑
ENSSSCG00000003301	protein_coding	1.8943	5.37389	0.00357618	0.141852	↑
ENSSSCG00000003317	protein_coding	3.19658	2.03903	0.0163541	0.323467	↑
ENSSSCG00000003324	protein_coding	4.39675	0.825779	0.023982	0.386089	↑
ENSSSCG00000003326	protein_coding	2.92344	3.55301	0.000459914	0.0406249	↑
ENSSSCG00000003336	protein_coding	9.02955	0.387734	0.00370499	0.144594	↑
ENSSSCG00000003338	protein_coding	2.94968	1.85087	0.0170576	0.330192	↑
ENSSSCG00000003342	protein_coding	3.91804	5.36229	2.91855e-06	0.00148872	↑
ENSSSCG00000003343	protein_coding	1.84326	3.98227	0.0392016	0.469383	↑
ENSSSCG00000003346	protein_coding	7.34559	-1.0997	0.0360223	0.453962	↑
ENSSSCG00000003350	protein_coding	2.90577	5.52062	4.98308e-05	0.0102754	↑
ENSSSCG00000003351	protein_coding	5.3158	4.43444	3.53043e-05	0.008278	↑
ENSSSCG00000003352	protein_coding	1.81477	4.56081	0.00456404	0.159686	↑
ENSSSCG00000003353	protein_coding	2.03212	3.61374	0.00577059	0.182232	↑
ENSSSCG00000003360	protein_coding	1.48088	5.01548	0.0186725	0.345917	↑
ENSSSCG00000003361	protein_coding	8.89789	0.265114	0.00439378	0.156795	↑
ENSSSCG00000003362	protein_coding	2.31446	2.61557	0.0201161	0.355914	↑
ENSSSCG00000003363	protein_coding	1.83914	3.84102	0.00916375	0.235576	↑
ENSSSCG00000003371	protein_coding	2.59995	3.00458	0.00431497	0.155812	↑
ENSSSCG00000003393	protein_coding	2.51981	1.89288	0.0456886	0.491158	↑
ENSSSCG00000003435	protein_coding	1.78581	4.92064	0.00513747	0.170516	↑
ENSSSCG00000003439	protein_coding	1.70479	5.54743	0.00966774	0.243578	↑
ENSSSCG00000003478	protein_coding	1.98851	3.0129	0.0353761	0.451321	↑
ENSSSCG00000003481	protein_coding	6.88652	-1.48401	0.041493	0.476277	↑
ENSSSCG00000003498	protein_coding	5.76469	2.33091	0.00406583	0.15101	↑
ENSSSCG00000003514	protein_coding	2.43464	7.91562	0.000558294	0.04509	↑
ENSSSCG00000003521	protein_coding	2.76671	3.65837	0.000866385	0.0597043	↑
ENSSSCG00000003522	protein_coding	7.69247	-0.828126	0.0160026	0.319337	↑
ENSSSCG00000003527	protein_coding	1.91262	5.15003	0.0138964	0.296182	↑
ENSSSCG00000003579	protein_coding	3.57217	3.41826	8.25644e-05	0.0143746	↑
ENSSSCG00000003592	protein_coding	1.91758	4.41346	0.00534309	0.174159	↑
ENSSSCG00000003603	protein_coding	1.41556	8.08637	0.0356287	0.451965	↑
ENSSSCG00000003604	protein_coding	2.22391	3.26748	0.00729293	0.207986	↑
ENSSSCG00000003621	protein_coding	1.37669	4.38511	0.035932	0.453635	↑
ENSSSCG00000003624	protein_coding	7.90866	-0.655888	0.0136291	0.292046	↑
ENSSSCG00000003633	protein_coding	9.01277	0.370585	0.00275448	0.120794	↑
ENSSSCG00000003637	protein_coding	1.33309	6.17933	0.0403638	0.473093	↑
ENSSSCG00000003655	protein_coding	1.45026	5.30978	0.0370777	0.459324	↑
ENSSSCG00000003702	protein_coding	2.34834	6.39924	0.000408363	0.0378126	↑
ENSSSCG00000003733	protein_coding	9.0166	0.376356	0.00464126	0.161032	↑
ENSSSCG00000003763	protein_coding	3.15191	6.45265	0.00338591	0.137025	↑
ENSSSCG00000003788	protein_coding	2.30015	2.44678	0.037981	0.464485	↑
ENSSSCG00000003823	protein_coding	8.95334	0.318946	0.00879436	0.229736	↑
ENSSSCG00000003832	protein_coding	10.7528	2.03699	2.85741e-06	0.00148356	↑
ENSSSCG00000003846	protein_coding	3.6095	0.732554	0.0283392	0.415723	↑
ENSSSCG00000003852	protein_coding	5.032	-0.0197408	0.0309468	0.429694	↑
ENSSSCG00000003882	protein_coding	7.50155	-0.995497	0.020049	0.355914	↑
ENSSSCG00000003908	protein_coding	4.13847	2.40225	0.0072207	0.207452	↑
ENSSSCG00000003919	protein_coding	1.86239	3.44713	0.0174286	0.334258	↑
ENSSSCG00000003927	protein_coding	9.2	0.547076	0.00272428	0.119831	↑
ENSSSCG00000003941	protein_coding	1.69371	4.97205	0.00807973	0.219976	↑
ENSSSCG00000003954	protein_coding	5.29158	1.4235	0.039848	0.470825	↑
ENSSSCG00000003972	protein_coding	7.50273	-0.978968	0.0228977	0.377839	↑
ENSSSCG00000003998	protein_coding	5.01375	3.21555	0.000165146	0.0212462	↑
ENSSSCG00000004002	protein_coding	1.74941	9.17859	0.0117858	0.272612	↑
ENSSSCG00000004045	protein_coding	8.03944	-0.510204	0.0164626	0.325336	↑
ENSSSCG00000004058	protein_coding	1.61667	8.02359	0.0165795	0.32593	↑
ENSSSCG00000004067	protein_coding	3.82577	0.438642	0.0277005	0.411124	↑
ENSSSCG00000004125	protein_coding	2.08442	3.13505	0.0410336	0.474811	↑
ENSSSCG00000004127	protein_coding	1.84941	2.92606	0.0338872	0.443612	↑
ENSSSCG00000004138	protein_coding	1.58653	4.95741	0.0167935	0.328299	↑
ENSSSCG00000004142	protein_coding	1.71083	6.82948	0.0157312	0.316747	↑
ENSSSCG00000004147	protein_coding	9.0654	0.422145	0.00482771	0.164815	↑
ENSSSCG00000004149	protein_coding	1.61398	3.87876	0.0214687	0.366284	↑
ENSSSCG00000004167	protein_coding	4.0497	2.02901	0.0249356	0.392743	↑
ENSSSCG00000004172	protein_coding	3.59796	3.26241	0.00227061	0.107511	↑
ENSSSCG00000004174	protein_coding	2.26755	4.39689	0.00177614	0.0914007	↑
ENSSSCG00000004192	protein_coding	1.65132	6.47994	0.0425052	0.48231	↑
ENSSSCG00000004218	protein_coding	4.68676	1.77056	0.00484333	0.164894	↑
ENSSSCG00000004270	protein_coding	3.42384	2.42568	0.0150108	0.309972	↑
ENSSSCG00000004322	protein_coding	1.7199	5.4884	0.0204589	0.358132	↑
ENSSSCG00000004328	protein_coding	1.55555	5.69321	0.0154638	0.314974	↑
ENSSSCG00000004379	protein_coding	2.91987	1.49687	0.0397581	0.470825	↑
ENSSSCG00000004387	protein_coding	1.50306	5.19632	0.0194672	0.352725	↑
ENSSSCG00000004402	protein_coding	5.14192	0.584995	0.0125464	0.281081	↑
ENSSSCG00000004413	protein_coding	8.19752	-0.369527	0.0148658	0.308291	↑
ENSSSCG00000004464	protein_coding	2.38555	5.36564	0.00185576	0.0940003	↑
ENSSSCG00000004475	protein_coding	4.9212	1.06267	0.00998236	0.249131	↑
ENSSSCG00000004490	protein_coding	1.87355	4.36754	0.00423143	0.154554	↑
ENSSSCG00000004699	protein_coding	5.6679	-0.264376	0.0180866	0.340523	↑
ENSSSCG00000004758	protein_coding	8.32295	-0.261026	0.00953902	0.240962	↑
ENSSSCG00000004822	protein_coding	9.38334	0.718661	0.00129283	0.0750481	↑
ENSSSCG00000004830	protein_coding	2.88352	5.9816	0.000793187	0.0567065	↑
ENSSSCG00000004856	protein_coding	2.68402	1.79096	0.0347624	0.447524	↑
ENSSSCG00000004859	protein_coding	2.38292	4.96079	0.000239159	0.0270566	↑
ENSSSCG00000004885	protein_coding	6.78647	-1.56645	0.0432288	0.484759	↑
ENSSSCG00000004959	protein_coding	6.86269	-1.49699	0.0436073	0.486012	↑
ENSSSCG00000004971	protein_coding	2.09725	3.11455	0.0127893	0.284724	↑
ENSSSCG00000004972	protein_coding	2.11259	4.21848	0.003534	0.141336	↑
ENSSSCG00000004978	protein_coding	7.28924	-1.19252	0.0320206	0.436766	↑
ENSSSCG00000004980	protein_coding	1.789	4.77432	0.00478512	0.164022	↑
ENSSSCG00000005094	protein_coding	7.36973	-1.07767	0.0396904	0.470825	↑
ENSSSCG00000005128	protein_coding	8.6672	0.0393656	0.00318318	0.132216	↑
ENSSSCG00000005225	protein_coding	3.65019	0.968273	0.0272821	0.40888	↑
ENSSSCG00000005310	protein_coding	1.40155	4.14176	0.0413396	0.475744	↑
ENSSSCG00000005316	protein_coding	2.33567	8.07119	0.000656061	0.0499345	↑
ENSSSCG00000005385	protein_coding	2.57715	3.43729	0.00143962	0.0806494	↑
ENSSSCG00000005437	protein_coding	2.75337	3.98902	0.000316317	0.0320451	↑
ENSSSCG00000005464	protein_coding	6.81933	-1.54043	0.0413812	0.475744	↑
ENSSSCG00000005484	protein_coding	1.83258	4.29697	0.0067479	0.198921	↑
ENSSSCG00000005487	protein_coding	2.48115	5.12422	0.000277815	0.0293726	↑
ENSSSCG00000005489	protein_coding	8.52516	-0.0881202	0.00435363	0.155917	↑
ENSSSCG00000005490	protein_coding	5.42799	0.81751	0.00431999	0.155812	↑
ENSSSCG00000005494	protein_coding	1.95106	3.51865	0.0181165	0.340523	↑
ENSSSCG00000005498	protein_coding	1.47994	4.53773	0.0275181	0.409946	↑
ENSSSCG00000005529	protein_coding	8.91531	0.282776	0.0062168	0.188089	↑
ENSSSCG00000005615	protein_coding	1.81443	3.52496	0.02437	0.388328	↑
ENSSSCG00000005626	protein_coding	1.69531	3.79353	0.0255874	0.396762	↑
ENSSSCG00000005630	protein_coding	6.8359	0.799405	0.00111589	0.0678923	↑
ENSSSCG00000005650	protein_coding	1.64388	4.6415	0.0121864	0.276597	↑
ENSSSCG00000005657	protein_coding	1.42098	3.96949	0.0461034	0.493137	↑
ENSSSCG00000005659	protein_coding	1.35069	4.02745	0.0460869	0.493137	↑
ENSSSCG00000005679	protein_coding	1.59497	4.46659	0.0141036	0.298187	↑
ENSSSCG00000005688	protein_coding	1.91572	7.31989	0.00442892	0.157038	↑
ENSSSCG00000005699	protein_coding	2.59202	2.74287	0.0202978	0.356696	↑
ENSSSCG00000005706	protein_coding	1.93615	7.213	0.00363403	0.143273	↑
ENSSSCG00000005710	protein_coding	3.9067	8.13094	3.04681e-06	0.0015158	↑
ENSSSCG00000005713	protein_coding	5.90434	0.772926	0.00465832	0.161431	↑
ENSSSCG00000005715	protein_coding	1.34099	6.99378	0.0471779	0.498732	↑
ENSSSCG00000005724	protein_coding	2.35292	7.39816	0.00579729	0.182232	↑
ENSSSCG00000005733	protein_coding	1.99097	4.70311	0.00363175	0.143273	↑
ENSSSCG00000005749	protein_coding	1.93962	5.03363	0.00233503	0.109149	↑
ENSSSCG00000005751	protein_coding	3.89476	6.38764	2.68713e-07	0.000300493	↑
ENSSSCG00000005753	protein_coding	1.84172	5.0118	0.00436954	0.156266	↑
ENSSSCG00000005759	protein_coding	3.19733	3.85976	2.20617e-05	0.00628441	↑
ENSSSCG00000005761	protein_coding	2.94126	4.05119	0.000174812	0.0220028	↑
ENSSSCG00000005787	protein_coding	1.95494	4.93547	0.00209944	0.10259	↑
ENSSSCG00000005828	protein_coding	1.6511	6.13941	0.0295213	0.422891	↑
ENSSSCG00000005831	protein_coding	6.98622	-1.39608	0.0429006	0.483651	↑
ENSSSCG00000005832	protein_coding	1.88466	5.96275	0.00869251	0.228306	↑
ENSSSCG00000005838	protein_coding	2.38273	4.30798	0.000715529	0.053108	↑
ENSSSCG00000005839	protein_coding	2.10688	4.60578	0.00616981	0.187448	↑
ENSSSCG00000005849	protein_coding	1.61917	6.98244	0.0258838	0.398915	↑
ENSSSCG00000005853	protein_coding	7.08208	-1.33142	0.0340519	0.443935	↑
ENSSSCG00000005859	protein_coding	4.42341	3.64388	0.000914914	0.061152	↑
ENSSSCG00000005894	protein_coding	3.53677	3.43842	3.60549e-05	0.00838636	↑
ENSSSCG00000005901	protein_coding	4.21816	4.00948	8.02592e-08	0.000129641	↑
ENSSSCG00000005906	protein_coding	2.2317	5.70865	0.000865954	0.0597043	↑
ENSSSCG00000005907	protein_coding	2.26286	4.05058	0.00144756	0.0809383	↑
ENSSSCG00000005908	protein_coding	2.47841	3.44243	0.00338851	0.137025	↑
ENSSSCG00000005914	protein_coding	1.30033	4.54539	0.0393874	0.470348	↑
ENSSSCG00000005916	protein_coding	2.77913	2.21102	0.020947	0.362505	↑
ENSSSCG00000005917	protein_coding	2.91586	3.31522	0.00112597	0.0683456	↑
ENSSSCG00000005920	protein_coding	2.876	4.11971	0.000320591	0.0322525	↑
ENSSSCG00000005921	protein_coding	2.96001	4.25321	1.67117e-05	0.00516908	↑
ENSSSCG00000005922	protein_coding	6.95566	-1.44511	0.0379447	0.464485	↑
ENSSSCG00000005926	protein_coding	4.18132	5.27302	5.58235e-06	0.00228601	↑
ENSSSCG00000005935	protein_coding	1.91042	5.15693	0.00327432	0.134404	↑
ENSSSCG00000005946	protein_coding	4.2144	1.69905	0.00246028	0.112712	↑
ENSSSCG00000005965	protein_coding	1.76017	5.01313	0.0180893	0.340523	↑
ENSSSCG00000006011	protein_coding	8.3881	-0.234993	0.0123523	0.278688	↑
ENSSSCG00000006013	protein_coding	7.02371	-1.38158	0.0347707	0.447524	↑
ENSSSCG00000006038	protein_coding	1.31098	5.28334	0.0386116	0.466541	↑
ENSSSCG00000006115	protein_coding	1.43293	4.24228	0.0354228	0.451719	↑
ENSSSCG00000006189	protein_coding	8.22457	-0.366384	0.00760456	0.212395	↑
ENSSSCG00000006243	protein_coding	3.41789	4.4301	0.00397173	0.149196	↑
ENSSSCG00000006247	protein_coding	8.26028	-0.327252	0.00726805	0.207588	↑
ENSSSCG00000006276	protein_coding	2.65794	5.37074	0.0005737	0.0459513	↑
ENSSSCG00000006277	protein_coding	1.55502	4.80277	0.0225552	0.374097	↑
ENSSSCG00000006331	protein_coding	1.32662	6.21447	0.0385715	0.4665	↑
ENSSSCG00000006336	protein_coding	8.96755	0.331611	0.00676952	0.199013	↑
ENSSSCG00000006392	protein_coding	1.49414	4.38301	0.0289145	0.418878	↑
ENSSSCG00000006399	protein_coding	4.75076	0.119581	0.0240855	0.387113	↑
ENSSSCG00000006462	protein_coding	5.02103	2.24932	0.00695453	0.201397	↑
ENSSSCG00000006464	protein_coding	5.51818	3.15702	0.000206169	0.0243673	↑
ENSSSCG00000006496	protein_coding	2.06237	6.87878	0.00223234	0.106577	↑
ENSSSCG00000006497	protein_coding	4.35826	1.67798	0.00256275	0.115882	↑
ENSSSCG00000006525	protein_coding	5.26253	1.08541	0.00808784	0.219976	↑
ENSSSCG00000006528	protein_coding	2.1265	3.21487	0.0311946	0.431701	↑
ENSSSCG00000006543	protein_coding	2.1401	7.55305	0.01226	0.277401	↑
ENSSSCG00000006549	protein_coding	2.24909	2.97126	0.0159759	0.319309	↑
ENSSSCG00000006555	protein_coding	8.21082	-0.356849	0.0162797	0.322873	↑
ENSSSCG00000006569	protein_coding	1.93149	4.10672	0.0044005	0.156795	↑
ENSSSCG00000006652	protein_coding	1.45062	6.24164	0.0334621	0.442704	↑
ENSSSCG00000006669	protein_coding	1.73654	7.24414	0.0220331	0.369016	↑
ENSSSCG00000006678	protein_coding	2.50397	2.41735	0.0228573	0.377551	↑
ENSSSCG00000006688	protein_coding	3.28809	2.17344	0.00634595	0.190465	↑
ENSSSCG00000006718	protein_coding	2.15732	3.59363	0.00592364	0.18381	↑
ENSSSCG00000006726	protein_coding	8.82883	0.202037	0.00571533	0.182008	↑
ENSSSCG00000006791	protein_coding	5.31669	7.70933	0.00681329	0.199292	↑
ENSSSCG00000006797	protein_coding	7.4464	-1.03817	0.0217294	0.368138	↑
ENSSSCG00000006808	protein_coding	8.55885	-0.0596951	0.00395624	0.14894	↑
ENSSSCG00000006815	protein_coding	2.93182	4.79739	0.00162294	0.0869005	↑
ENSSSCG00000006837	protein_coding	9.07762	0.429333	0.00180347	0.0921543	↑
ENSSSCG00000006919	protein_coding	4.7254	6.46121	0.000376696	0.0360277	↑
ENSSSCG00000006923	protein_coding	2.44753	5.95628	0.0133348	0.290201	↑
ENSSSCG00000006924	protein_coding	3.54934	8.48423	0.0023497	0.109483	↑
ENSSSCG00000006928	protein_coding	1.69656	4.73178	0.00825734	0.223278	↑
ENSSSCG00000006940	protein_coding	2.99903	6.79325	0.00194397	0.0967826	↑
ENSSSCG00000006954	protein_coding	2.0731	8.45398	0.00246933	0.112712	↑
ENSSSCG00000006955	protein_coding	1.88452	4.97359	0.0130385	0.286326	↑
ENSSSCG00000006956	protein_coding	3.99949	2.29262	0.000546378	0.0442505	↑
ENSSSCG00000006960	protein_coding	2.3845	3.55885	0.00469164	0.162025	↑
ENSSSCG00000007023	protein_coding	1.67641	5.42729	0.0103275	0.254092	↑
ENSSSCG00000007115	protein_coding	3.32446	4.60945	1.81996e-06	0.00122517	↑
ENSSSCG00000007147	protein_coding	2.16544	3.46701	0.0138722	0.296182	↑
ENSSSCG00000007189	protein_coding	7.52018	4.54769	2.20666e-06	0.00133007	↑
ENSSSCG00000007206	protein_coding	1.89391	5.06033	0.0334827	0.442704	↑
ENSSSCG00000007228	protein_coding	1.42169	6.00177	0.0368753	0.458184	↑
ENSSSCG00000007236	protein_coding	8.49984	-0.0969489	0.0130132	0.286266	↑
ENSSSCG00000007263	protein_coding	8.32996	-0.263886	0.00666855	0.197643	↑
ENSSSCG00000007267	protein_coding	7.44537	-1.02411	0.0262254	0.401371	↑
ENSSSCG00000007312	protein_coding	3.98028	2.83148	0.000166139	0.0212797	↑
ENSSSCG00000007324	protein_coding	1.62762	3.97837	0.0234183	0.382793	↑
ENSSSCG00000007334	protein_coding	1.69703	3.66588	0.0190447	0.349115	↑
ENSSSCG00000007356	protein_coding	1.35092	6.44307	0.0360962	0.453962	↑
ENSSSCG00000007358	protein_coding	1.91788	3.24605	0.0311953	0.431701	↑
ENSSSCG00000007379	protein_coding	5.20807	3.52717	6.75825e-05	0.0123582	↑
ENSSSCG00000007401	protein_coding	1.58682	6.03037	0.027682	0.411059	↑
ENSSSCG00000007405	protein_coding	8.31053	-0.27286	0.00934191	0.237788	↑
ENSSSCG00000007425	protein_coding	1.99256	4.75865	0.00196675	0.0974161	↑
ENSSSCG00000007432	protein_coding	1.40803	4.89974	0.0216136	0.367495	↑
ENSSSCG00000007436	protein_coding	3.30402	1.98206	0.0426576	0.48231	↑
ENSSSCG00000007472	protein_coding	3.03483	2.84405	0.00179444	0.0920163	↑
ENSSSCG00000007501	protein_coding	9.25039	0.583955	0.000657937	0.0499466	↑
ENSSSCG00000007508	protein_coding	5.7412	7.1861	3.28647e-05	0.00802975	↑
ENSSSCG00000007510	protein_coding	5.27122	2.20884	0.00981569	0.246558	↑
ENSSSCG00000007517	protein_coding	1.71751	4.02709	0.0129115	0.285477	↑
ENSSSCG00000007522	protein_coding	2.16885	6.21571	0.00255911	0.115882	↑
ENSSSCG00000007527	protein_coding	1.63345	4.74209	0.0222653	0.370939	↑
ENSSSCG00000007530	protein_coding	7.12272	1.06568	0.000321873	0.0322525	↑
ENSSSCG00000007539	protein_coding	6.71832	-1.62005	0.0456365	0.491074	↑
ENSSSCG00000007543	protein_coding	4.58856	2.24251	0.000215885	0.0251216	↑
ENSSSCG00000007544	protein_coding	3.07878	3.24192	0.00398128	0.149362	↑
ENSSSCG00000007552	protein_coding	6.91355	-1.46528	0.0390466	0.46851	↑
ENSSSCG00000007557	protein_coding	2.02525	2.59449	0.0480079	0.502278	↑
ENSSSCG00000007558	protein_coding	3.55999	4.97291	1.81775e-07	0.000229787	↑
ENSSSCG00000007559	protein_coding	5.22848	2.67353	0.000216007	0.0251216	↑
ENSSSCG00000007563	protein_coding	2.26239	3.30894	0.00685242	0.199955	↑
ENSSSCG00000007565	protein_coding	2.82656	3.61735	0.000300302	0.030962	↑
ENSSSCG00000007574	protein_coding	2.26826	3.5709	0.0107821	0.260023	↑
ENSSSCG00000007576	protein_coding	3.16466	3.68837	9.05778e-05	0.0147648	↑
ENSSSCG00000007577	protein_coding	2.8523	3.86208	0.00253622	0.1154	↑
ENSSSCG00000007583	protein_coding	9.18967	0.528394	0.000818766	0.0579212	↑
ENSSSCG00000007601	protein_coding	1.85369	2.9487	0.0430973	0.484086	↑
ENSSSCG00000007652	protein_coding	3.37205	2.2752	0.00281451	0.122999	↑
ENSSSCG00000007659	protein_coding	2.5086	1.8778	0.0444509	0.488439	↑
ENSSSCG00000007667	protein_coding	1.5186	4.93267	0.0167004	0.327419	↑
ENSSSCG00000007668	protein_coding	1.6997	4.25716	0.0105974	0.257409	↑
ENSSSCG00000007698	protein_coding	2.08421	4.04385	0.0183246	0.341749	↑
ENSSSCG00000007704	protein_coding	2.07136	3.29201	0.0103297	0.254092	↑
ENSSSCG00000007718	protein_coding	4.42922	2.02988	0.0197414	0.354529	↑
ENSSSCG00000007727	protein_coding	1.54248	3.39006	0.0491418	0.506637	↑
ENSSSCG00000007767	protein_coding	2.35215	2.26633	0.0443021	0.48791	↑
ENSSSCG00000007817	protein_coding	1.89669	4.58107	0.00610326	0.187244	↑
ENSSSCG00000007823	protein_coding	10.5782	1.86489	1.46956e-06	0.00101732	↑
ENSSSCG00000007836	protein_coding	7.22183	-1.20789	0.0337009	0.442704	↑
ENSSSCG00000007849	protein_coding	1.83067	4.07399	0.0256335	0.396856	↑
ENSSSCG00000007901	protein_coding	2.99652	4.14473	0.00324761	0.133746	↑
ENSSSCG00000007927	protein_coding	5.33936	2.39457	0.000103032	0.0160196	↑
ENSSSCG00000007930	protein_coding	1.3403	4.98691	0.0327309	0.439765	↑
ENSSSCG00000007939	protein_coding	1.56154	4.74988	0.0115514	0.269765	↑
ENSSSCG00000007944	protein_coding	2.96946	2.88002	0.00177025	0.0912591	↑
ENSSSCG00000007947	protein_coding	2.00587	3.45525	0.0102097	0.25285	↑
ENSSSCG00000007949	protein_coding	3.57064	1.49788	0.0235197	0.382793	↑
ENSSSCG00000007950	protein_coding	2.09011	3.987	0.00263112	0.117511	↑
ENSSSCG00000007967	protein_coding	3.24239	3.08976	0.000262451	0.0285797	↑
ENSSSCG00000007968	protein_coding	1.34998	4.69799	0.0314122	0.432718	↑
ENSSSCG00000007978	protein_coding	2.78943	6.1821	0.000232656	0.0266318	↑
ENSSSCG00000007979	protein_coding	1.49316	5.62002	0.0202282	0.35623	↑
ENSSSCG00000007981	protein_coding	2.60586	3.06259	0.00628964	0.189897	↑
ENSSSCG00000007982	protein_coding	2.43186	4.32897	0.000493903	0.0415925	↑
ENSSSCG00000007991	protein_coding	2.71017	3.08224	0.0066116	0.196356	↑
ENSSSCG00000007992	protein_coding	2.01725	3.79616	0.0103393	0.254112	↑
ENSSSCG00000007993	protein_coding	4.85862	3.5103	0.000211384	0.0248826	↑
ENSSSCG00000007997	protein_coding	1.59004	4.29563	0.0138868	0.296182	↑
ENSSSCG00000008000	protein_coding	1.93715	4.55961	0.00355531	0.14141	↑
ENSSSCG00000008007	protein_coding	3.13287	3.73446	3.74201e-05	0.00856685	↑
ENSSSCG00000008010	protein_coding	3.02279	2.84115	0.0185528	0.344679	↑
ENSSSCG00000008013	protein_coding	8.99148	0.350745	0.00288814	0.123899	↑
ENSSSCG00000008014	protein_coding	5.48246	3.02176	3.34296e-05	0.00809971	↑
ENSSSCG00000008015	protein_coding	2.01565	4.11461	0.00529779	0.173852	↑
ENSSSCG00000008017	protein_coding	4.61565	4.19854	0.000507131	0.0420081	↑
ENSSSCG00000008018	protein_coding	1.52686	5.38149	0.0169394	0.329602	↑
ENSSSCG00000008020	protein_coding	2.9424	4.71541	1.20373e-05	0.00404913	↑
ENSSSCG00000008021	protein_coding	1.65634	3.16102	0.0484924	0.503728	↑
ENSSSCG00000008022	protein_coding	2.8736	4.49759	2.06344e-05	0.0061219	↑
ENSSSCG00000008026	protein_coding	2.71447	4.21614	9.18945e-05	0.0147648	↑
ENSSSCG00000008029	protein_coding	4.83777	2.40677	0.00108889	0.0669336	↑
ENSSSCG00000008040	protein_coding	1.62447	5.80243	0.0120017	0.275123	↑
ENSSSCG00000008041	protein_coding	3.70464	6.59839	6.18199e-06	0.00246221	↑
ENSSSCG00000008047	protein_coding	2.58706	5.31668	9.40544e-05	0.0150255	↑
ENSSSCG00000008054	protein_coding	4.80982	1.20707	0.0094338	0.239016	↑
ENSSSCG00000008056	protein_coding	2.04633	4.50577	0.00241826	0.111782	↑
ENSSSCG00000008057	protein_coding	2.58512	4.88584	0.000697783	0.0521543	↑
ENSSSCG00000008061	protein_coding	3.77745	6.45393	9.52332e-08	0.000138445	↑
ENSSSCG00000008081	protein_coding	7.45315	-1.02749	0.0217739	0.368138	↑
ENSSSCG00000008108	protein_coding	3.62104	1.28399	0.0415327	0.476544	↑
ENSSSCG00000008114	protein_coding	9.59661	0.914329	0.000197571	0.0237371	↑
ENSSSCG00000008133	protein_coding	4.37788	1.3095	0.00395679	0.14894	↑
ENSSSCG00000008134	protein_coding	2.94915	2.17354	0.0462724	0.494077	↑
ENSSSCG00000008141	protein_coding	8.19392	-0.397973	0.00829246	0.223451	↑
ENSSSCG00000008144	protein_coding	3.32949	4.53871	1.0352e-06	0.000800897	↑
ENSSSCG00000008169	protein_coding	1.59935	5.6055	0.0384913	0.466432	↑
ENSSSCG00000008171	protein_coding	1.6307	3.25292	0.0427494	0.482694	↑
ENSSSCG00000008198	protein_coding	1.98385	4.53803	0.00169687	0.0894752	↑
ENSSSCG00000008275	protein_coding	1.59629	3.94313	0.0212417	0.363606	↑
ENSSSCG00000008311	protein_coding	8.90512	0.255119	0.00193258	0.0964319	↑
ENSSSCG00000008337	protein_coding	2.06233	6.22459	0.00891983	0.231764	↑
ENSSSCG00000008355	protein_coding	1.35502	3.92383	0.046767	0.497206	↑
ENSSSCG00000008356	protein_coding	1.83841	4.11662	0.0074488	0.209858	↑
ENSSSCG00000008362	protein_coding	4.01616	0.879909	0.0336309	0.442704	↑
ENSSSCG00000008369	protein_coding	8.44857	-0.1803	0.0129275	0.285613	↑
ENSSSCG00000008372	protein_coding	1.41982	4.6084	0.0271412	0.408352	↑
ENSSSCG00000008461	protein_coding	2.41168	5.55562	0.000730051	0.0536881	↑
ENSSSCG00000008555	protein_coding	2.00495	3.81248	0.0045516	0.159635	↑
ENSSSCG00000008557	protein_coding	3.39496	6.62232	2.05164e-06	0.00126918	↑
ENSSSCG00000008568	protein_coding	4.74603	1.85586	0.0112285	0.266115	↑
ENSSSCG00000008572	protein_coding	6.09774	0.118135	0.00776355	0.214322	↑
ENSSSCG00000008598	protein_coding	1.57784	6.59992	0.0160879	0.320162	↑
ENSSSCG00000008627	protein_coding	1.8145	7.10698	0.0322788	0.438008	↑
ENSSSCG00000008647	protein_coding	5.16502	6.37596	7.34329e-05	0.0130831	↑
ENSSSCG00000008648	protein_coding	7.60983	7.42865	2.57998e-06	0.00143284	↑
ENSSSCG00000008675	protein_coding	2.30276	4.84632	0.000442439	0.0398264	↑
ENSSSCG00000008681	protein_coding	2.44957	4.5757	0.000144186	0.0196817	↑
ENSSSCG00000008691	protein_coding	3.13616	1.95889	0.0352583	0.450772	↑
ENSSSCG00000008692	protein_coding	1.38304	6.84664	0.0399371	0.471255	↑
ENSSSCG00000008693	protein_coding	1.23585	4.96643	0.0433433	0.484759	↑
ENSSSCG00000008695	protein_coding	2.87963	2.15773	0.0160615	0.319855	↑
ENSSSCG00000008697	protein_coding	2.31341	6.17068	0.000654432	0.0499345	↑
ENSSSCG00000008698	protein_coding	1.73598	4.33572	0.0104143	0.254833	↑
ENSSSCG00000008700	protein_coding	4.48012	-0.121058	0.0382858	0.465784	↑
ENSSSCG00000008718	protein_coding	7.73443	-0.786627	0.0157274	0.316747	↑
ENSSSCG00000008723	protein_coding	2.79791	4.61949	8.3423e-05	0.0144376	↑
ENSSSCG00000008724	protein_coding	1.90687	4.14333	0.0186163	0.345418	↑
ENSSSCG00000008728	protein_coding	2.67731	1.77939	0.0288556	0.418442	↑
ENSSSCG00000008735	protein_coding	1.44544	6.26954	0.0297213	0.424851	↑
ENSSSCG00000008786	protein_coding	4.68819	0.542208	0.0327794	0.440213	↑
ENSSSCG00000008796	protein_coding	2.41508	3.64207	0.0127802	0.284724	↑
ENSSSCG00000008834	protein_coding	11.3345	2.60879	3.55853e-06	0.00164229	↑
ENSSSCG00000008840	protein_coding	6.96796	-1.44919	0.0402082	0.472582	↑
ENSSSCG00000008882	protein_coding	3.203	7.12322	0.00169279	0.0894752	↑
ENSSSCG00000008977	protein_coding	5.68915	6.76142	0.00018213	0.0226162	↑
ENSSSCG00000008984	protein_coding	1.31986	4.27169	0.0425635	0.48231	↑
ENSSSCG00000008993	protein_coding	1.95425	2.98501	0.0274901	0.409946	↑
ENSSSCG00000009000	protein_coding	5.8915	-0.0759937	0.0110169	0.263384	↑
ENSSSCG00000009008	protein_coding	2.17514	3.83511	0.0179366	0.339893	↑
ENSSSCG00000009028	protein_coding	1.50867	4.67371	0.0330154	0.441344	↑
ENSSSCG00000009033	protein_coding	7.55386	-0.941424	0.0193295	0.351608	↑
ENSSSCG00000009138	protein_coding	1.77186	5.71595	0.0108275	0.260819	↑
ENSSSCG00000009155	protein_coding	8.85295	0.213266	0.0020765	0.10164	↑
ENSSSCG00000009208	protein_coding	1.84256	5.43857	0.0197608	0.354572	↑
ENSSSCG00000009221	protein_coding	8.63686	0.0183366	0.00395977	0.14894	↑
ENSSSCG00000009224	protein_coding	1.98065	4.61114	0.00168782	0.0893867	↑
ENSSSCG00000009240	protein_coding	4.57527	5.84118	0.000943113	0.0617513	↑
ENSSSCG00000009268	protein_coding	2.43716	4.38345	0.00067853	0.0509774	↑
ENSSSCG00000009270	protein_coding	3.04729	2.48613	0.013905	0.296182	↑
ENSSSCG00000009333	protein_coding	7.45148	-1.01373	0.0309398	0.429694	↑
ENSSSCG00000009354	protein_coding	9.92039	1.2317	0.000731229	0.0536881	↑
ENSSSCG00000009462	protein_coding	4.54221	0.0554473	0.0448673	0.490718	↑
ENSSSCG00000009512	protein_coding	2.29462	3.05362	0.0111511	0.265236	↑
ENSSSCG00000009529	protein_coding	7.35683	-1.10008	0.0272361	0.408611	↑
ENSSSCG00000009535	protein_coding	2.25274	3.01072	0.0204673	0.358132	↑
ENSSSCG00000009545	protein_coding	2.0257	8.61373	0.00621503	0.188089	↑
ENSSSCG00000009551	protein_coding	1.25584	4.76551	0.0395085	0.470783	↑
ENSSSCG00000009558	protein_coding	4.61729	-0.437594	0.0428145	0.482867	↑
ENSSSCG00000009565	protein_coding	3.06352	6.1623	8.05721e-06	0.00304238	↑
ENSSSCG00000009585	protein_coding	3.64276	4.26541	5.80482e-07	0.000625093	↑
ENSSSCG00000009603	protein_coding	4.29785	1.12122	0.0248498	0.392028	↑
ENSSSCG00000009612	protein_coding	1.92971	3.7068	0.0146044	0.305045	↑
ENSSSCG00000009625	protein_coding	2.00656	3.2852	0.0133347	0.290201	↑
ENSSSCG00000009630	protein_coding	9.17526	0.521007	0.00148642	0.0824766	↑
ENSSSCG00000009633	protein_coding	2.25887	4.22869	0.00837557	0.225273	↑
ENSSSCG00000009636	protein_coding	3.04376	3.0162	0.00192165	0.0962018	↑
ENSSSCG00000009703	protein_coding	8.42186	-0.177878	0.00612433	0.187244	↑
ENSSSCG00000009704	protein_coding	2.65372	3.857	0.00884056	0.230322	↑
ENSSSCG00000009716	protein_coding	1.50877	3.76288	0.0359713	0.453737	↑
ENSSSCG00000009720	protein_coding	4.38958	6.8945	0.00189699	0.0955893	↑
ENSSSCG00000009733	protein_coding	1.48405	5.77153	0.0199538	0.355914	↑
ENSSSCG00000009743	protein_coding	3.47325	1.94742	0.0151741	0.311657	↑
ENSSSCG00000009744	protein_coding	1.33147	5.06997	0.033433	0.442704	↑
ENSSSCG00000009745	protein_coding	1.93625	5.55206	0.0049136	0.166313	↑
ENSSSCG00000009761	protein_coding	2.46943	5.48463	0.000331975	0.0327193	↑
ENSSSCG00000009765	protein_coding	1.82806	5.14257	0.0197017	0.354371	↑
ENSSSCG00000009786	protein_coding	1.47941	5.61315	0.023974	0.386089	↑
ENSSSCG00000009794	protein_coding	2.02957	4.71115	0.00116694	0.0697065	↑
ENSSSCG00000009806	protein_coding	2.17115	3.98721	0.00233029	0.109149	↑
ENSSSCG00000009809	protein_coding	8.32395	-0.259475	0.00997743	0.249131	↑
ENSSSCG00000009881	protein_coding	4.62524	7.73183	0.000401448	0.037291	↑
ENSSSCG00000009882	protein_coding	3.63459	7.47043	0.0159812	0.319309	↑
ENSSSCG00000009885	protein_coding	1.39176	5.4298	0.0312257	0.43171	↑
ENSSSCG00000009892	protein_coding	7.59723	-0.913889	0.0176595	0.337472	↑
ENSSSCG00000009895	protein_coding	7.59923	-0.910756	0.0176532	0.337472	↑
ENSSSCG00000009921	protein_coding	8.96592	0.303124	0.00433541	0.155812	↑
ENSSSCG00000009936	protein_coding	8.94407	0.308635	0.00476493	0.163759	↑
ENSSSCG00000009937	protein_coding	2.26302	4.20949	0.0028551	0.12353	↑
ENSSSCG00000009966	protein_coding	2.66945	3.06221	0.00364948	0.143314	↑
ENSSSCG00000009997	protein_coding	2.80961	1.74635	0.0286425	0.417225	↑
ENSSSCG00000010003	protein_coding	1.52882	3.82684	0.0334895	0.442704	↑
ENSSSCG00000010017	protein_coding	2.20406	7.45943	0.00158631	0.0857284	↑
ENSSSCG00000010031	protein_coding	2.58487	4.46879	0.000127385	0.0182449	↑
ENSSSCG00000010047	protein_coding	8.66061	0.0485686	0.0092358	0.236175	↑
ENSSSCG00000010067	protein_coding	1.49753	6.84743	0.0420368	0.480073	↑
ENSSSCG00000010098	protein_coding	1.90764	4.51223	0.00285123	0.12353	↑
ENSSSCG00000010099	protein_coding	10.4243	1.71314	2.48889e-06	0.00141891	↑
ENSSSCG00000010104	protein_coding	4.0288	3.40313	0.000111748	0.0167477	↑
ENSSSCG00000010106	protein_coding	8.6047	-0.0180066	0.00363844	0.143273	↑
ENSSSCG00000010107	protein_coding	1.87376	4.89301	0.00283132	0.123234	↑
ENSSSCG00000010109	protein_coding	3.05501	2.53706	0.00414019	0.152762	↑
ENSSSCG00000010113	protein_coding	7.57616	-0.933683	0.0183208	0.341749	↑
ENSSSCG00000010123	protein_coding	3.3817	2.94589	0.000429102	0.0389879	↑
ENSSSCG00000010138	protein_coding	2.014	3.66064	0.00766763	0.212967	↑
ENSSSCG00000010224	protein_coding	2.44353	3.37215	0.011486	0.269102	↑
ENSSSCG00000010273	protein_coding	7.31449	-1.15056	0.0249155	0.392639	↑
ENSSSCG00000010303	protein_coding	7.06413	-1.33871	0.0366445	0.457192	↑
ENSSSCG00000010304	protein_coding	5.26121	-0.644825	0.0395491	0.470825	↑
ENSSSCG00000010322	protein_coding	3.76228	2.97318	0.000414555	0.0382641	↑
ENSSSCG00000010325	protein_coding	3.62969	4.11627	6.04144e-05	0.0113966	↑
ENSSSCG00000010329	protein_coding	1.43873	5.55022	0.0288284	0.418271	↑
ENSSSCG00000010371	protein_coding	6.88283	-1.48987	0.0404755	0.473093	↑
ENSSSCG00000010381	protein_coding	2.39278	2.87216	0.00848291	0.225821	↑
ENSSSCG00000010384	protein_coding	8.99486	0.35579	0.00434162	0.155843	↑
ENSSSCG00000010445	protein_coding	4.70218	3.45523	0.00995018	0.248927	↑
ENSSSCG00000010449	protein_coding	2.43776	2.73648	0.012358	0.278688	↑
ENSSSCG00000010451	protein_coding	3.94406	7.60688	0.00171194	0.0894863	↑
ENSSSCG00000010452	protein_coding	5.6696	8.41884	0.000162223	0.0211709	↑
ENSSSCG00000010453	protein_coding	5.26677	8.52459	0.000258532	0.0284728	↑
ENSSSCG00000010454	protein_coding	2.48811	6.13128	0.00638396	0.191078	↑
ENSSSCG00000010478	protein_coding	7.09119	-1.31679	0.0364145	0.456358	↑
ENSSSCG00000010479	protein_coding	3.30368	2.75042	0.00225674	0.107039	↑
ENSSSCG00000010491	protein_coding	1.95964	2.94735	0.0449318	0.490718	↑
ENSSSCG00000010505	protein_coding	4.35937	1.1581	0.0332322	0.442093	↑
ENSSSCG00000010513	protein_coding	1.59061	3.40447	0.0386148	0.466541	↑
ENSSSCG00000010527	protein_coding	7.35086	1.28671	0.0001649	0.0212462	↑
ENSSSCG00000010600	protein_coding	1.48014	4.32192	0.0230143	0.378474	↑
ENSSSCG00000010604	protein_coding	1.98583	5.07183	0.00236514	0.10985	↑
ENSSSCG00000010607	protein_coding	2.35663	3.00218	0.0217847	0.368138	↑
ENSSSCG00000010647	protein_coding	7.69913	-0.829796	0.0159901	0.319309	↑
ENSSSCG00000010676	protein_coding	2.89681	1.86862	0.0232333	0.380568	↑
ENSSSCG00000010686	protein_coding	2.21528	3.4749	0.00498839	0.167867	↑
ENSSSCG00000010708	protein_coding	2.3624	4.80741	0.0075905	0.212269	↑
ENSSSCG00000010710	protein_coding	7.05051	-1.38268	0.0379927	0.464485	↑
ENSSSCG00000010728	protein_coding	2.90368	4.07332	0.00014033	0.0192823	↑
ENSSSCG00000010735	protein_coding	2.07794	4.33043	0.00212174	0.103409	↑
ENSSSCG00000010756	protein_coding	1.9285	3.4085	0.0173504	0.333199	↑
ENSSSCG00000010768	protein_coding	2.62302	3.42189	0.00429137	0.155575	↑
ENSSSCG00000010770	protein_coding	4.0348	2.01087	0.00557798	0.179006	↑
ENSSSCG00000010792	protein_coding	6.79056	-1.56005	0.0439458	0.486012	↑
ENSSSCG00000010826	protein_coding	1.432	4.82	0.0210219	0.363169	↑
ENSSSCG00000010861	protein_coding	2.35714	5.49914	0.000597772	0.046879	↑
ENSSSCG00000010879	protein_coding	2.60087	4.36163	8.98888e-05	0.0147648	↑
ENSSSCG00000010894	protein_coding	1.57025	6.32574	0.0282449	0.414901	↑
ENSSSCG00000010903	protein_coding	1.64575	3.63955	0.0226352	0.374783	↑
ENSSSCG00000010913	protein_coding	9.21674	0.55281	0.000746684	0.0545474	↑
ENSSSCG00000010915	protein_coding	2.45643	3.10279	0.00542464	0.175451	↑
ENSSSCG00000010923	protein_coding	6.79095	-1.58562	0.0458376	0.492034	↑
ENSSSCG00000010949	protein_coding	1.57031	5.75234	0.0142685	0.29932	↑
ENSSSCG00000010950	protein_coding	1.46933	4.76865	0.018373	0.342213	↑
ENSSSCG00000010954	protein_coding	6.9401	-1.44674	0.0384225	0.46625	↑
ENSSSCG00000010967	protein_coding	7.28844	-1.15705	0.0291058	0.420184	↑
ENSSSCG00000010973	protein_coding	1.82814	4.255	0.00615395	0.187448	↑
ENSSSCG00000010980	protein_coding	3.95076	0.761183	0.0253679	0.394765	↑
ENSSSCG00000011020	protein_coding	1.65767	6.25351	0.012054	0.275348	↑
ENSSSCG00000011046	protein_coding	1.45369	5.2699	0.02662	0.403957	↑
ENSSSCG00000011069	protein_coding	2.933	1.71532	0.0397177	0.470825	↑
ENSSSCG00000011129	protein_coding	1.72479	6.2485	0.0133899	0.29053	↑
ENSSSCG00000011136	protein_coding	1.55348	4.95786	0.0134082	0.29071	↑
ENSSSCG00000011145	protein_coding	1.79838	5.24974	0.0217269	0.368138	↑
ENSSSCG00000011157	protein_coding	1.50118	5.1189	0.0314796	0.432718	↑
ENSSSCG00000011158	protein_coding	2.01514	3.90029	0.00565758	0.180763	↑
ENSSSCG00000011163	protein_coding	1.4862	3.91741	0.0438994	0.486012	↑
ENSSSCG00000011181	protein_coding	7.26231	-1.18072	0.029526	0.422891	↑
ENSSSCG00000011205	protein_coding	7.41123	-1.04538	0.034618	0.447524	↑
ENSSSCG00000011226	protein_coding	1.38707	5.88186	0.039776	0.470825	↑
ENSSSCG00000011255	protein_coding	6.89883	-1.48859	0.0395702	0.470825	↑
ENSSSCG00000011256	protein_coding	7.1463	-1.29001	0.0301374	0.426795	↑
ENSSSCG00000011286	protein_coding	7.13218	-1.29263	0.0320159	0.436766	↑
ENSSSCG00000011313	protein_coding	1.34001	4.71178	0.0401608	0.472552	↑
ENSSSCG00000011316	protein_coding	7.18345	-1.25026	0.0308909	0.429694	↑
ENSSSCG00000011324	protein_coding	6.98622	-1.39608	0.0429264	0.483689	↑
ENSSSCG00000011326	protein_coding	2.32983	3.76107	0.00152487	0.0834485	↑
ENSSSCG00000011388	protein_coding	2.39893	3.05132	0.018986	0.349085	↑
ENSSSCG00000011391	protein_coding	2.98261	3.80257	0.00798913	0.219136	↑
ENSSSCG00000011393	protein_coding	3.46754	6.79038	0.00315281	0.13133	↑
ENSSSCG00000011408	protein_coding	2.78933	3.01342	0.0354827	0.451869	↑
ENSSSCG00000011521	protein_coding	2.72924	4.28252	0.000236462	0.0269609	↑
ENSSSCG00000011538	protein_coding	1.52835	5.82744	0.0209293	0.362429	↑
ENSSSCG00000011547	protein_coding	7.30937	-1.15874	0.025004	0.393184	↑
ENSSSCG00000011574	protein_coding	6.09619	0.916367	0.0162287	0.322082	↑
ENSSSCG00000011613	protein_coding	2.09282	3.72064	0.00857847	0.226745	↑
ENSSSCG00000011643	protein_coding	3.38285	5.26712	9.20253e-07	0.000800897	↑
ENSSSCG00000011663	protein_coding	7.58923	-0.926566	0.0181741	0.340691	↑
ENSSSCG00000011664	protein_coding	1.81787	5.69688	0.0161605	0.320946	↑
ENSSSCG00000011722	protein_coding	1.36579	4.35704	0.0444202	0.488286	↑
ENSSSCG00000011738	protein_coding	8.80686	0.18469	0.0190198	0.349085	↑
ENSSSCG00000011741	protein_coding	1.32734	8.13246	0.0479727	0.502278	↑
ENSSSCG00000011810	protein_coding	1.47981	5.62072	0.027754	0.411708	↑
ENSSSCG00000011859	protein_coding	1.77908	4.69268	0.00424771	0.154765	↑
ENSSSCG00000011874	protein_coding	5.09434	7.15529	8.5519e-05	0.0146173	↑
ENSSSCG00000011876	protein_coding	2.63405	6.23328	0.0101458	0.252128	↑
ENSSSCG00000011878	protein_coding	2.62478	3.2403	0.00469153	0.162025	↑
ENSSSCG00000012026	protein_coding	1.989	6.53654	0.00263089	0.117511	↑
ENSSSCG00000012050	protein_coding	1.59338	4.83327	0.0385091	0.466432	↑
ENSSSCG00000012064	protein_coding	6.60813	1.43157	0.000312039	0.0318058	↑
ENSSSCG00000012068	protein_coding	1.59019	4.24102	0.0458303	0.492034	↑
ENSSSCG00000012070	protein_coding	7.31638	-1.12992	0.0304142	0.428048	↑
ENSSSCG00000012076	protein_coding	5.83286	8.96021	7.15166e-05	0.0129959	↑
ENSSSCG00000012077	protein_coding	6.24081	10.1554	4.68632e-05	0.00987353	↑
ENSSSCG00000012084	protein_coding	2.08088	3.48312	0.00612523	0.187244	↑
ENSSSCG00000012088	protein_coding	1.96034	7.1179	0.00365741	0.143314	↑
ENSSSCG00000012089	protein_coding	1.86939	2.85399	0.0354912	0.451869	↑
ENSSSCG00000012132	protein_coding	2.2858	4.30998	0.00862486	0.227351	↑
ENSSSCG00000012153	protein_coding	2.08733	2.84577	0.0300226	0.426432	↑
ENSSSCG00000012207	protein_coding	3.08512	1.57914	0.0264218	0.40305	↑
ENSSSCG00000012273	protein_coding	1.59979	5.29794	0.0212406	0.363606	↑
ENSSSCG00000012315	protein_coding	2.60887	3.74802	0.00160668	0.0863477	↑
ENSSSCG00000012324	protein_coding	1.71183	3.09513	0.041729	0.478042	↑
ENSSSCG00000012352	protein_coding	7.25409	1.1912	0.000179105	0.0223497	↑
ENSSSCG00000012558	protein_coding	5.33947	-0.60935	0.0461335	0.493137	↑
ENSSSCG00000012568	protein_coding	7.97974	-0.574828	0.0114375	0.269102	↑
ENSSSCG00000012732	protein_coding	3.29354	2.7092	0.000881455	0.0600194	↑
ENSSSCG00000012768	protein_coding	4.31711	2.10442	0.00763895	0.212572	↑
ENSSSCG00000012793	protein_coding	2.86613	4.96983	2.22629e-05	0.00628441	↑
ENSSSCG00000012795	protein_coding	1.49624	3.91323	0.0436119	0.486012	↑
ENSSSCG00000012796	protein_coding	1.59594	5.23315	0.0123761	0.278688	↑
ENSSSCG00000012835	protein_coding	6.87909	-1.49578	0.0396795	0.470825	↑
ENSSSCG00000012836	protein_coding	1.96333	5.97554	0.00582737	0.182576	↑
ENSSSCG00000012838	protein_coding	1.33564	4.2684	0.0408539	0.473958	↑
ENSSSCG00000012839	protein_coding	2.71107	5.09007	0.000716022	0.053108	↑
ENSSSCG00000012841	protein_coding	3.26159	3.66829	0.0116106	0.270511	↑
ENSSSCG00000012842	protein_coding	1.56237	8.46231	0.0195363	0.353026	↑
ENSSSCG00000012844	protein_coding	2.80737	3.45097	0.00337855	0.137003	↑
ENSSSCG00000012846	protein_coding	2.39081	4.44599	0.0068008	0.199292	↑
ENSSSCG00000012848	protein_coding	2.98404	1.66674	0.0297856	0.425127	↑
ENSSSCG00000012852	protein_coding	9.12992	0.46374	0.00123138	0.0721822	↑
ENSSSCG00000012853	protein_coding	8.17009	6.56602	2.8207e-05	0.00725769	↑
ENSSSCG00000012854	protein_coding	4.23124	1.73521	0.0109212	0.261941	↑
ENSSSCG00000012857	protein_coding	1.33543	4.26608	0.045407	0.490718	↑
ENSSSCG00000012862	protein_coding	2.52102	3.52512	0.00574208	0.182062	↑
ENSSSCG00000012864	protein_coding	7.16658	-1.25757	0.0330674	0.44143	↑
ENSSSCG00000012878	protein_coding	1.84829	3.90499	0.0380294	0.464485	↑
ENSSSCG00000012885	protein_coding	3.07439	4.99561	4.39375e-06	0.00187865	↑
ENSSSCG00000012886	protein_coding	2.4653	3.77502	0.00129318	0.0750481	↑
ENSSSCG00000012890	protein_coding	3.57972	5.68373	0.000669241	0.0504098	↑
ENSSSCG00000012893	protein_coding	4.29882	6.26999	2.11107e-05	0.00619995	↑
ENSSSCG00000012895	protein_coding	5.10948	0.556602	0.0133134	0.29017	↑
ENSSSCG00000012903	protein_coding	1.50337	4.59517	0.0192549	0.351215	↑
ENSSSCG00000012904	protein_coding	1.94682	4.6463	0.00471641	0.162476	↑
ENSSSCG00000012909	protein_coding	7.3699	-1.11254	0.0244241	0.388474	↑
ENSSSCG00000012920	protein_coding	1.52464	5.88823	0.0234451	0.382793	↑
ENSSSCG00000012933	protein_coding	5.71533	-0.296452	0.0165657	0.325879	↑
ENSSSCG00000012944	protein_coding	2.16408	3.26533	0.00806465	0.219962	↑
ENSSSCG00000012947	protein_coding	10.974	2.25171	3.11842e-08	6.97446e-05	↑
ENSSSCG00000012955	protein_coding	1.77485	4.55306	0.0063722	0.191002	↑
ENSSSCG00000012963	protein_coding	1.69495	5.03472	0.00905066	0.233851	↑
ENSSSCG00000012964	protein_coding	6.76972	-1.59266	0.0429681	0.483689	↑
ENSSSCG00000012968	protein_coding	5.5974	-0.388093	0.0281379	0.41448	↑
ENSSSCG00000012978	protein_coding	3.28551	2.96245	0.000524281	0.0428232	↑
ENSSSCG00000012983	protein_coding	1.31921	5.44344	0.0396662	0.470825	↑
ENSSSCG00000012988	protein_coding	1.84391	4.65772	0.0243211	0.38797	↑
ENSSSCG00000012996	protein_coding	1.90607	3.59631	0.016869	0.328952	↑
ENSSSCG00000013017	protein_coding	1.38332	4.38974	0.033583	0.442704	↑
ENSSSCG00000013018	protein_coding	2.08057	2.87807	0.0360478	0.453962	↑
ENSSSCG00000013019	protein_coding	1.62681	4.1817	0.0138833	0.296182	↑
ENSSSCG00000013021	protein_coding	2.59036	5.05668	0.000113874	0.0169789	↑
ENSSSCG00000013032	protein_coding	2.16505	4.13099	0.00172932	0.0899464	↑
ENSSSCG00000013033	protein_coding	1.93195	4.21486	0.00461937	0.160656	↑
ENSSSCG00000013042	protein_coding	3.75333	0.616644	0.0372177	0.460078	↑
ENSSSCG00000013066	protein_coding	1.70603	3.78702	0.0196994	0.354371	↑
ENSSSCG00000013078	protein_coding	3.46665	2.04499	0.01224	0.277163	↑
ENSSSCG00000013087	protein_coding	1.42844	4.53534	0.0349246	0.448297	↑
ENSSSCG00000013093	protein_coding	4.66361	2.71187	0.00256066	0.115882	↑
ENSSSCG00000013110	protein_coding	1.80869	4.34429	0.00488917	0.165679	↑
ENSSSCG00000013113	protein_coding	1.58382	4.77641	0.0119495	0.274867	↑
ENSSSCG00000013114	protein_coding	1.92834	5.96552	0.0126949	0.283707	↑
ENSSSCG00000013116	protein_coding	4.91271	-0.135388	0.0381598	0.465197	↑
ENSSSCG00000013240	protein_coding	6.16175	0.167721	0.0063879	0.191078	↑
ENSSSCG00000013244	protein_coding	3.0521	4.78333	0.000125898	0.0181211	↑
ENSSSCG00000013248	protein_coding	1.5573	4.48057	0.0324067	0.43906	↑
ENSSSCG00000013270	protein_coding	1.64506	4.28824	0.0133607	0.290527	↑
ENSSSCG00000013303	protein_coding	2.0319	4.4153	0.00589254	0.183771	↑
ENSSSCG00000013316	protein_coding	2.56619	5.70675	0.00010858	0.0165441	↑
ENSSSCG00000013382	protein_coding	2.67126	5.70986	0.00264488	0.117584	↑
ENSSSCG00000013399	protein_coding	1.39147	4.50076	0.0301408	0.426795	↑
ENSSSCG00000013416	protein_coding	1.54496	5.23752	0.0168298	0.328628	↑
ENSSSCG00000013417	protein_coding	7.16093	-1.26668	0.0314802	0.432718	↑
ENSSSCG00000013418	protein_coding	3.17908	5.68616	3.07592e-06	0.0015158	↑
ENSSSCG00000013423	protein_coding	1.2655	4.2641	0.0491828	0.506637	↑
ENSSSCG00000013424	protein_coding	2.31088	3.79614	0.00423661	0.154554	↑
ENSSSCG00000013425	protein_coding	7.80141	-0.728157	0.0147779	0.307124	↑
ENSSSCG00000013437	protein_coding	1.83873	5.24423	0.00514681	0.170631	↑
ENSSSCG00000013442	protein_coding	3.17995	5.30426	5.78275e-06	0.00233519	↑
ENSSSCG00000013457	protein_coding	2.39929	3.96137	0.000857331	0.0597043	↑
ENSSSCG00000013464	protein_coding	1.77325	4.31302	0.00687675	0.199955	↑
ENSSSCG00000013468	protein_coding	1.2531	4.69826	0.0434943	0.485773	↑
ENSSSCG00000013477	protein_coding	8.11271	-0.466934	0.00893817	0.23185	↑
ENSSSCG00000013490	protein_coding	4.79516	1.16784	0.0049262	0.166546	↑
ENSSSCG00000013523	protein_coding	1.32702	5.45966	0.041377	0.475744	↑
ENSSSCG00000013534	protein_coding	1.24507	5.02967	0.0441534	0.486826	↑
ENSSSCG00000013555	protein_coding	7.3221	-1.13848	0.0253355	0.394765	↑
ENSSSCG00000013588	protein_coding	1.61002	4.40901	0.0119215	0.274765	↑
ENSSSCG00000013614	protein_coding	1.59475	6.18686	0.0201088	0.355914	↑
ENSSSCG00000013637	protein_coding	2.05223	2.39995	0.0452601	0.490718	↑
ENSSSCG00000013650	protein_coding	1.89729	4.34052	0.00613092	0.187244	↑
ENSSSCG00000013664	protein_coding	3.31175	6.20419	0.000482194	0.0415925	↑
ENSSSCG00000013668	protein_coding	8.8743	0.2324	0.00193361	0.0964319	↑
ENSSSCG00000013735	protein_coding	3.51365	6.43143	6.53686e-07	0.000678783	↑
ENSSSCG00000013742	protein_coding	1.42453	4.21339	0.0304161	0.428048	↑
ENSSSCG00000013753	protein_coding	3.86746	5.16859	4.92499e-08	0.000102282	↑
ENSSSCG00000013762	protein_coding	3.58702	3.14643	0.00039969	0.0372826	↑
ENSSSCG00000013763	protein_coding	1.33439	4.02543	0.0458935	0.4922	↑
ENSSSCG00000013764	protein_coding	1.73231	3.38037	0.0409339	0.474164	↑
ENSSSCG00000013773	protein_coding	1.54717	4.04918	0.028433	0.416468	↑
ENSSSCG00000013782	protein_coding	7.04555	-1.34596	0.0438129	0.486012	↑
ENSSSCG00000013853	protein_coding	3.91155	0.932013	0.0479936	0.502278	↑
ENSSSCG00000013860	protein_coding	1.84945	4.01551	0.00818974	0.222124	↑
ENSSSCG00000013898	protein_coding	2.19258	2.33849	0.0365416	0.457192	↑
ENSSSCG00000013902	protein_coding	7.82056	-0.695793	0.032027	0.436766	↑
ENSSSCG00000013908	protein_coding	1.72113	4.54053	0.00735487	0.208299	↑
ENSSSCG00000014003	protein_coding	1.76132	3.95784	0.0165541	0.325871	↑
ENSSSCG00000014047	protein_coding	3.7371	3.15653	0.000119057	0.0173948	↑
ENSSSCG00000014056	protein_coding	1.41984	3.8159	0.0484172	0.503728	↑
ENSSSCG00000014102	protein_coding	9.80671	1.10745	0.00047598	0.0414345	↑
ENSSSCG00000014124	protein_coding	7.66043	-0.853503	0.0168524	0.328848	↑
ENSSSCG00000014164	protein_coding	1.6731	3.68864	0.0451596	0.490718	↑
ENSSSCG00000014172	protein_coding	1.95147	4.13162	0.0339615	0.443612	↑
ENSSSCG00000014176	protein_coding	2.84123	3.10821	0.00546158	0.176048	↑
ENSSSCG00000014221	protein_coding	5.60789	0.496505	0.00932426	0.237601	↑
ENSSSCG00000014256	protein_coding	1.56734	3.98896	0.0334778	0.442704	↑
ENSSSCG00000014277	protein_coding	1.77543	5.94118	0.0318083	0.435622	↑
ENSSSCG00000014280	protein_coding	1.38111	6.19905	0.0402623	0.472599	↑
ENSSSCG00000014303	protein_coding	2.58545	5.54057	0.000129866	0.0185091	↑
ENSSSCG00000014322	protein_coding	2.56081	3.92638	0.000335995	0.0330035	↑
ENSSSCG00000014336	protein_coding	2.16358	7.03784	0.0222089	0.370467	↑
ENSSSCG00000014363	protein_coding	7.4206	-1.06362	0.0219611	0.369016	↑
ENSSSCG00000014379	protein_coding	2.48187	2.18805	0.0331006	0.44167	↑
ENSSSCG00000014385	protein_coding	2.93799	3.27826	0.00388725	0.148075	↑
ENSSSCG00000014390	protein_coding	1.34996	5.15296	0.0360316	0.453962	↑
ENSSSCG00000014397	protein_coding	7.44746	-1.02063	0.0274527	0.409946	↑
ENSSSCG00000014410	protein_coding	2.96213	2.30512	0.00787386	0.216649	↑
ENSSSCG00000014433	protein_coding	3.32381	3.87909	7.37816e-06	0.00282263	↑
ENSSSCG00000014446	protein_coding	7.18305	-1.27045	0.0316782	0.434659	↑
ENSSSCG00000014448	protein_coding	9.08338	0.421682	0.00121892	0.0717509	↑
ENSSSCG00000014450	protein_coding	2.48514	3.80229	0.000598181	0.046879	↑
ENSSSCG00000014562	protein_coding	1.38554	4.75217	0.0242245	0.387632	↑
ENSSSCG00000014564	protein_coding	3.13745	6.24699	0.00416827	0.153214	↑
ENSSSCG00000014565	protein_coding	4.41351	8.27892	9.88603e-05	0.0156215	↑
ENSSSCG00000014567	protein_coding	2.63974	2.07226	0.0263313	0.402132	↑
ENSSSCG00000014581	protein_coding	2.79278	2.38922	0.0109173	0.261941	↑
ENSSSCG00000014618	protein_coding	4.26055	8.55297	0.000323064	0.0322525	↑
ENSSSCG00000014625	protein_coding	1.67876	3.26981	0.0379923	0.464485	↑
ENSSSCG00000014628	protein_coding	2.46357	4.59378	0.000116802	0.0173267	↑
ENSSSCG00000014670	protein_coding	1.99315	6.89698	0.0270467	0.408299	↑
ENSSSCG00000014780	protein_coding	1.86519	5.64271	0.0339937	0.443612	↑
ENSSSCG00000014792	protein_coding	1.80498	5.0338	0.00577418	0.182232	↑
ENSSSCG00000014799	protein_coding	2.96834	2.64074	0.0189919	0.349085	↑
ENSSSCG00000014802	protein_coding	2.65897	7.9296	0.000110191	0.0166001	↑
ENSSSCG00000014810	protein_coding	6.99184	-1.41016	0.036408	0.456358	↑
ENSSSCG00000014817	protein_coding	1.80527	5.67469	0.00573328	0.182062	↑
ENSSSCG00000014822	protein_coding	2.74853	5.70366	6.07559e-05	0.0113966	↑
ENSSSCG00000014825	protein_coding	6.96202	0.915766	0.00064349	0.0494959	↑
ENSSSCG00000014832	protein_coding	4.62389	1.04236	0.0268752	0.406554	↑
ENSSSCG00000014835	protein_coding	1.36469	5.19522	0.0437289	0.486012	↑
ENSSSCG00000014844	protein_coding	1.63054	4.30577	0.0111659	0.265236	↑
ENSSSCG00000014854	protein_coding	5.39562	1.50445	0.00213624	0.103692	↑
ENSSSCG00000014869	protein_coding	1.49689	3.67689	0.0474018	0.499915	↑
ENSSSCG00000014875	protein_coding	1.45764	4.76321	0.0261482	0.401371	↑
ENSSSCG00000014891	protein_coding	1.81723	5.64026	0.00583428	0.182596	↑
ENSSSCG00000014895	protein_coding	6.14234	0.166679	0.0104025	0.254833	↑
ENSSSCG00000014907	protein_coding	2.08052	5.06537	0.00146273	0.0814727	↑
ENSSSCG00000014958	protein_coding	1.90911	2.86427	0.0328054	0.440359	↑
ENSSSCG00000014960	protein_coding	1.85733	4.59149	0.00538552	0.17515	↑
ENSSSCG00000014977	protein_coding	2.67024	3.62539	0.00670015	0.198046	↑
ENSSSCG00000015049	protein_coding	8.18606	-0.37883	0.0167169	0.327523	↑
ENSSSCG00000015073	protein_coding	2.2295	8.66662	0.00288921	0.123899	↑
ENSSSCG00000015082	protein_coding	7.22477	-1.22222	0.02847	0.416591	↑
ENSSSCG00000015099	protein_coding	2.18279	5.68884	0.00107112	0.0661698	↑
ENSSSCG00000015126	protein_coding	3.72833	1.56064	0.0370951	0.459344	↑
ENSSSCG00000015199	protein_coding	7.4464	-1.03817	0.0217197	0.368138	↑
ENSSSCG00000015246	protein_coding	3.18096	2.49445	0.00442791	0.157038	↑
ENSSSCG00000015250	protein_coding	1.97275	3.33154	0.0275224	0.409946	↑
ENSSSCG00000015271	protein_coding	1.53404	5.87566	0.0281648	0.414629	↑
ENSSSCG00000015281	protein_coding	3.09584	2.42425	0.00757067	0.212059	↑
ENSSSCG00000015287	protein_coding	4.15557	0.713801	0.01498	0.309555	↑
ENSSSCG00000015324	protein_coding	1.63229	8.4685	0.0357687	0.452571	↑
ENSSSCG00000015363	protein_coding	3.64591	2.82163	0.0357338	0.452571	↑
ENSSSCG00000015370	protein_coding	2.4223	1.94195	0.043343	0.484759	↑
ENSSSCG00000015525	protein_coding	2.21244	5.83425	0.0110841	0.26394	↑
ENSSSCG00000015544	protein_coding	7.14377	-1.27398	0.035292	0.450772	↑
ENSSSCG00000015561	protein_coding	8.12419	-0.429776	0.0400963	0.472117	↑
ENSSSCG00000015595	protein_coding	1.70426	4.64519	0.0109331	0.261941	↑
ENSSSCG00000015610	protein_coding	7.62101	-0.902849	0.0181358	0.340523	↑
ENSSSCG00000015617	protein_coding	2.46087	3.91133	0.0168875	0.329091	↑
ENSSSCG00000015618	protein_coding	4.08967	3.15611	0.00116757	0.0697065	↑
ENSSSCG00000015625	protein_coding	6.75704	-1.58639	0.0438838	0.486012	↑
ENSSSCG00000015633	protein_coding	8.43726	-0.161159	0.00670258	0.198046	↑
ENSSSCG00000015636	protein_coding	3.54724	4.73018	2.33121e-07	0.00027112	↑
ENSSSCG00000015657	protein_coding	10.5709	1.85498	1.29672e-06	0.000942551	↑
ENSSSCG00000015660	protein_coding	1.8568	4.41715	0.0453976	0.490718	↑
ENSSSCG00000015699	protein_coding	7.04515	-1.36906	0.0344687	0.446982	↑
ENSSSCG00000015724	protein_coding	2.31626	2.60926	0.0388982	0.467545	↑
ENSSSCG00000015733	protein_coding	2.31907	4.81649	0.0017072	0.0894752	↑
ENSSSCG00000015738	protein_coding	2.30241	2.74305	0.0265089	0.403744	↑
ENSSSCG00000015741	protein_coding	7.75478	-0.752206	0.0339561	0.443612	↑
ENSSSCG00000015774	protein_coding	1.46439	3.9685	0.031164	0.431701	↑
ENSSSCG00000015801	protein_coding	1.99587	4.33153	0.0241766	0.387311	↑
ENSSSCG00000015828	protein_coding	5.42097	0.281159	0.0109153	0.261941	↑
ENSSSCG00000015860	protein_coding	7.54826	-0.935698	0.0247589	0.391656	↑
ENSSSCG00000015895	protein_coding	5.64428	3.08305	0.0156471	0.31659	↑
ENSSSCG00000015910	protein_coding	2.4979	3.40495	0.0356455	0.451981	↑
ENSSSCG00000015913	protein_coding	2.39591	4.98407	0.000212691	0.0249355	↑
ENSSSCG00000015935	protein_coding	4.7821	1.55841	0.00444686	0.15729	↑
ENSSSCG00000016111	protein_coding	1.98302	5.10382	0.00264415	0.117584	↑
ENSSSCG00000016178	protein_coding	7.32612	3.81886	1.12897e-09	8.20617e-06	↑
ENSSSCG00000016187	protein_coding	9.73722	1.05741	0.0048164	0.164749	↑
ENSSSCG00000016203	protein_coding	9.37562	0.713114	0.00281745	0.122999	↑
ENSSSCG00000016218	protein_coding	2.92025	3.14884	0.0373694	0.46117	↑
ENSSSCG00000016261	protein_coding	1.67676	5.29846	0.0358739	0.453296	↑
ENSSSCG00000016262	protein_coding	2.32297	7.89389	0.0149004	0.308546	↑
ENSSSCG00000016263	protein_coding	1.80365	4.22858	0.0454947	0.490718	↑
ENSSSCG00000016295	protein_coding	4.30588	0.694857	0.0155551	0.315554	↑
ENSSSCG00000016302	protein_coding	1.65032	3.68752	0.0222659	0.370939	↑
ENSSSCG00000016321	protein_coding	8.9312	0.299305	0.0163502	0.323467	↑
ENSSSCG00000016330	protein_coding	1.45576	4.26204	0.0422036	0.481118	↑
ENSSSCG00000016336	protein_coding	2.30285	3.2733	0.025871	0.398915	↑
ENSSSCG00000016338	protein_coding	2.0132	3.58897	0.0101418	0.252128	↑
ENSSSCG00000016340	protein_coding	2.92613	2.27731	0.00813846	0.221145	↑
ENSSSCG00000016343	protein_coding	7.74581	-0.792134	0.0151114	0.311606	↑
ENSSSCG00000016344	protein_coding	7.80943	-0.715532	0.0169616	0.329602	↑
ENSSSCG00000016364	protein_coding	3.00773	6.83781	9.19148e-05	0.0147648	↑
ENSSSCG00000016367	protein_coding	2.32542	3.30158	0.00495157	0.167209	↑
ENSSSCG00000016378	protein_coding	3.21396	1.77017	0.014818	0.307519	↑
ENSSSCG00000016381	protein_coding	2.83209	3.39788	0.00293091	0.124768	↑
ENSSSCG00000016403	protein_coding	8.25276	-0.345225	0.00768675	0.212967	↑
ENSSSCG00000016411	protein_coding	2.66387	2.97731	0.00450519	0.15839	↑
ENSSSCG00000016437	protein_coding	2.84244	4.79215	0.000155606	0.0206586	↑
ENSSSCG00000016438	protein_coding	1.56375	6.8565	0.0292859	0.421248	↑
ENSSSCG00000016448	protein_coding	2.38903	3.05944	0.018254	0.341437	↑
ENSSSCG00000016451	protein_coding	3.58324	5.15847	0.000189426	0.0231008	↑
ENSSSCG00000016461	protein_coding	2.14618	5.20928	0.00134897	0.0773598	↑
ENSSSCG00000016470	protein_coding	7.60182	-0.893143	0.0214403	0.366047	↑
ENSSSCG00000016502	protein_coding	2.56234	6.65526	0.00905646	0.233851	↑
ENSSSCG00000016523	protein_coding	4.46271	1.27514	0.0118541	0.273756	↑
ENSSSCG00000016567	protein_coding	2.3902	3.18096	0.0200328	0.355914	↑
ENSSSCG00000016578	protein_coding	3.0309	7.15929	2.40445e-05	0.00659522	↑
ENSSSCG00000016625	protein_coding	1.49578	3.82331	0.0420271	0.480073	↑
ENSSSCG00000016664	protein_coding	7.86691	-0.679979	0.0128578	0.285108	↑
ENSSSCG00000016725	protein_coding	1.73845	5.69448	0.00851822	0.226003	↑
ENSSSCG00000016733	protein_coding	4.53418	0.952107	0.0179562	0.339893	↑
ENSSSCG00000016734	protein_coding	1.41307	4.96162	0.0243161	0.38797	↑
ENSSSCG00000016754	protein_coding	1.42285	7.13873	0.0492578	0.506637	↑
ENSSSCG00000016762	protein_coding	3.79948	2.98916	0.00386923	0.147765	↑
ENSSSCG00000016763	protein_coding	1.94769	2.96277	0.0453781	0.490718	↑
ENSSSCG00000016773	protein_coding	3.53738	4.0237	1.2322e-05	0.00404913	↑
ENSSSCG00000016775	protein_coding	2.83165	2.6813	0.0215423	0.366711	↑
ENSSSCG00000016776	protein_coding	2.43328	3.55337	0.00135656	0.0776418	↑
ENSSSCG00000016777	protein_coding	2.7885	3.77233	0.000140596	0.0192823	↑
ENSSSCG00000016781	protein_coding	2.17278	5.04558	0.00137035	0.0778202	↑
ENSSSCG00000016859	protein_coding	2.11906	10.132	0.00600306	0.185604	↑
ENSSSCG00000016871	protein_coding	6.75704	-1.58639	0.0438773	0.486012	↑
ENSSSCG00000016904	protein_coding	5.54718	-0.353065	0.0469162	0.497298	↑
ENSSSCG00000016937	protein_coding	6.96619	-1.42836	0.0366817	0.457192	↑
ENSSSCG00000016958	protein_coding	1.86918	5.93449	0.00394564	0.14894	↑
ENSSSCG00000016991	protein_coding	1.75146	7.24362	0.00843745	0.225821	↑
ENSSSCG00000017012	protein_coding	1.90003	6.38429	0.00509086	0.16955	↑
ENSSSCG00000017062	protein_coding	10.4818	1.76419	0.000160439	0.0211709	↑
ENSSSCG00000017102	protein_coding	1.68379	4.08159	0.018385	0.342218	↑
ENSSSCG00000017114	protein_coding	1.65199	4.5085	0.0139842	0.297651	↑
ENSSSCG00000017118	protein_coding	8.11368	-0.457572	0.00922125	0.236175	↑
ENSSSCG00000017126	protein_coding	1.64316	4.84012	0.00887578	0.230826	↑
ENSSSCG00000017127	protein_coding	1.40269	4.65277	0.0274081	0.409946	↑
ENSSSCG00000017128	protein_coding	2.10311	3.13606	0.0114274	0.269102	↑
ENSSSCG00000017129	protein_coding	3.12425	2.65566	0.0245055	0.389186	↑
ENSSSCG00000017135	protein_coding	6.83822	-1.50997	0.0499836	0.510158	↑
ENSSSCG00000017136	protein_coding	2.70437	5.52539	5.21247e-05	0.0105952	↑
ENSSSCG00000017137	protein_coding	4.58914	3.06002	4.78009e-05	0.00999864	↑
ENSSSCG00000017139	protein_coding	2.17732	4.41679	0.000872619	0.0597043	↑
ENSSSCG00000017141	protein_coding	5.65772	-0.340969	0.0195288	0.353026	↑
ENSSSCG00000017142	protein_coding	1.89185	3.99872	0.00678373	0.199229	↑
ENSSSCG00000017143	protein_coding	3.21836	3.55174	8.99689e-05	0.0147648	↑
ENSSSCG00000017146	protein_coding	4.30571	8.84707	2.60911e-05	0.00695962	↑
ENSSSCG00000017148	protein_coding	3.71152	7.56201	0.000276206	0.0293091	↑
ENSSSCG00000017158	protein_coding	2.84871	1.85084	0.0484063	0.503728	↑
ENSSSCG00000017159	protein_coding	1.409	3.96988	0.0420384	0.480073	↑
ENSSSCG00000017165	protein_coding	1.60662	4.61626	0.010406	0.254833	↑
ENSSSCG00000017168	protein_coding	1.92294	4.54742	0.00232321	0.109149	↑
ENSSSCG00000017169	protein_coding	1.60318	4.198	0.0189779	0.349085	↑
ENSSSCG00000017187	protein_coding	6.39481	4.39199	0.00149323	0.0826963	↑
ENSSSCG00000017188	protein_coding	3.76025	3.26466	0.000182796	0.0226162	↑
ENSSSCG00000017189	protein_coding	11.1744	2.44858	3.88377e-09	1.61315e-05	↑
ENSSSCG00000017192	protein_coding	6.78008	2.99635	1.01089e-08	3.26574e-05	↑
ENSSSCG00000017193	protein_coding	3.35486	2.14793	0.00477326	0.163852	↑
ENSSSCG00000017195	protein_coding	2.1427	2.72216	0.031717	0.434987	↑
ENSSSCG00000017197	protein_coding	2.04225	5.214	0.00192164	0.0962018	↑
ENSSSCG00000017199	protein_coding	1.30943	4.22674	0.0445581	0.489063	↑
ENSSSCG00000017201	protein_coding	1.7614	4.22724	0.00725951	0.207588	↑
ENSSSCG00000017203	protein_coding	1.56973	4.09188	0.0190301	0.349085	↑
ENSSSCG00000017247	protein_coding	2.5143	2.7505	0.0129529	0.28574	↑
ENSSSCG00000017251	protein_coding	3.8722	3.16214	0.000245291	0.0273251	↑
ENSSSCG00000017295	protein_coding	3.61036	1.86539	0.0043544	0.155917	↑
ENSSSCG00000017300	protein_coding	1.38637	6.57343	0.0360984	0.453962	↑
ENSSSCG00000017335	protein_coding	1.90929	3.83375	0.00680866	0.199292	↑
ENSSSCG00000017340	protein_coding	1.71328	3.44832	0.0245554	0.389497	↑
ENSSSCG00000017367	protein_coding	2.21896	2.2058	0.0455218	0.490718	↑
ENSSSCG00000017384	protein_coding	2.17912	3.06442	0.0270121	0.408151	↑
ENSSSCG00000017392	protein_coding	7.29332	-1.149	0.0314996	0.432718	↑
ENSSSCG00000017407	protein_coding	2.15658	2.33075	0.0393029	0.47026	↑
ENSSSCG00000017416	protein_coding	4.07245	7.45661	0.000452555	0.0402944	↑
ENSSSCG00000017420	protein_coding	2.48866	7.1729	0.00469217	0.162025	↑
ENSSSCG00000017428	protein_coding	2.30145	5.94556	0.00101613	0.064188	↑
ENSSSCG00000017444	protein_coding	6.94363	-1.44114	0.0390514	0.46851	↑
ENSSSCG00000017448	protein_coding	3.17882	3.38988	0.00153739	0.0838644	↑
ENSSSCG00000017461	protein_coding	6.67379	-1.66194	0.0484353	0.503728	↑
ENSSSCG00000017463	protein_coding	6.98156	-1.4266	0.036716	0.457192	↑
ENSSSCG00000017481	protein_coding	3.78757	0.234397	0.0454874	0.490718	↑
ENSSSCG00000017488	protein_coding	6.78646	-1.56645	0.043289	0.484759	↑
ENSSSCG00000017520	protein_coding	2.72933	2.15069	0.047649	0.500903	↑
ENSSSCG00000017562	protein_coding	2.92113	4.52802	0.000939744	0.0616773	↑
ENSSSCG00000017579	protein_coding	3.02008	7.38678	1.82447e-05	0.00552566	↑
ENSSSCG00000017609	protein_coding	8.42698	-0.163397	0.0126946	0.283707	↑
ENSSSCG00000017614	protein_coding	3.59019	4.21612	0.0103078	0.253983	↑
ENSSSCG00000017638	protein_coding	3.64036	3.99786	1.18138e-05	0.00404101	↑
ENSSSCG00000017699	protein_coding	7.11104	-1.3266	0.0326989	0.439765	↑
ENSSSCG00000017754	protein_coding	3.14593	5.90517	0.00137657	0.0780189	↑
ENSSSCG00000017770	protein_coding	7.48778	-1.00268	0.0203037	0.356696	↑
ENSSSCG00000017797	protein_coding	2.90175	6.26505	0.0250042	0.393184	↑
ENSSSCG00000017814	protein_coding	3.16064	2.36936	0.0226126	0.374622	↑
ENSSSCG00000017823	protein_coding	4.35439	3.93338	5.44225e-06	0.00226048	↑
ENSSSCG00000017877	protein_coding	1.60156	6.0919	0.0204754	0.358132	↑
ENSSSCG00000017880	protein_coding	7.91304	-0.629119	0.0136447	0.292136	↑
ENSSSCG00000017882	protein_coding	2.05769	5.49737	0.00230027	0.108396	↑
ENSSSCG00000017884	protein_coding	4.22715	1.72513	0.0119647	0.274998	↑
ENSSSCG00000017885	protein_coding	2.98846	2.57812	0.0117682	0.272421	↑
ENSSSCG00000017886	protein_coding	2.55556	2.79853	0.037626	0.462997	↑
ENSSSCG00000017887	protein_coding	4.44143	6.17094	0.000580002	0.0462015	↑
ENSSSCG00000017915	protein_coding	2.51484	2.33437	0.0220537	0.369022	↑
ENSSSCG00000017924	protein_coding	1.3589	3.93476	0.0481852	0.502806	↑
ENSSSCG00000017934	protein_coding	6.38045	2.14378	0.000221364	0.0255403	↑
ENSSSCG00000017941	protein_coding	1.37831	4.79002	0.0244083	0.388435	↑
ENSSSCG00000017959	protein_coding	9.55531	0.869841	0.00029513	0.030537	↑
ENSSSCG00000017963	protein_coding	3.34112	1.38256	0.0464121	0.494842	↑
ENSSSCG00000017983	protein_coding	2.1862	5.0344	0.00131114	0.0757721	↑
ENSSSCG00000017985	protein_coding	7.47399	-0.993087	0.0325802	0.439197	↑
ENSSSCG00000017992	protein_coding	5.49917	0.307509	0.0107016	0.25886	↑
ENSSSCG00000018001	protein_coding	2.36584	3.01053	0.0121546	0.276442	↑
ENSSSCG00000018015	protein_coding	1.77163	3.25316	0.0285587	0.416839	↑
ENSSSCG00000018023	protein_coding	8.05595	-0.511856	0.00985365	0.247191	↑
ENSSSCG00000018028	protein_coding	8.40709	-0.179716	0.0181415	0.340523	↑
ENSSSCG00000018029	protein_coding	2.62918	1.72589	0.0404045	0.473093	↑
ENSSSCG00000018045	protein_coding	1.41222	4.38994	0.0322677	0.438008	↑
ENSSSCG00000018047	protein_coding	5.44127	0.340168	0.0141131	0.298187	↑
ENSSSCG00000018055	protein_coding	1.56307	4.05388	0.0281405	0.41448	↑
ENSSSCG00000020649	protein_coding	4.08052	2.20453	0.00089267	0.0604269	↑
ENSSSCG00000020678	protein_coding	2.46395	3.42641	0.00287703	0.123899	↑
ENSSSCG00000020688	protein_coding	1.63931	4.13671	0.0253347	0.394765	↑
ENSSSCG00000020703	protein_coding	1.51609	6.12085	0.019934	0.355914	↑
ENSSSCG00000020720	protein_coding	2.09146	5.24469	0.00221702	0.106545	↑
ENSSSCG00000020721	protein_coding	6.79904	-1.57238	0.0435066	0.485773	↑
ENSSSCG00000020759	protein_coding	4.85472	-0.97799	0.0478719	0.50212	↑
ENSSSCG00000020771	protein_coding	3.12934	9.3541	0.000241437	0.0271033	↑
ENSSSCG00000020777	protein_coding	2.64772	5.27165	0.000532056	0.0432109	↑
ENSSSCG00000020785	protein_coding	1.5205	5.93861	0.0230384	0.378655	↑
ENSSSCG00000020793	protein_coding	7.29567	-1.14502	0.0331604	0.441889	↑
ENSSSCG00000020798	protein_coding	10.4092	1.69406	4.38069e-05	0.00936533	↑
ENSSSCG00000020822	protein_coding	8.05755	-0.488251	0.0422216	0.481118	↑
ENSSSCG00000020829	protein_coding	2.78162	2.44339	0.0201493	0.355914	↑
ENSSSCG00000020845	protein_coding	7.19732	-1.26767	0.0345478	0.447284	↑
ENSSSCG00000020847	protein_coding	7.47571	-0.98974	0.0364037	0.456358	↑
ENSSSCG00000020886	protein_coding	3.80715	1.85813	0.00259039	0.116228	↑
ENSSSCG00000020893	protein_coding	2.5514	5.75558	0.0110316	0.263384	↑
ENSSSCG00000020895	protein_coding	7.71184	-0.809965	0.0156385	0.31659	↑
ENSSSCG00000020900	protein_coding	4.82928	-0.988986	0.0479033	0.502143	↑
ENSSSCG00000020906	protein_coding	2.44622	8.22812	0.00871867	0.22858	↑
ENSSSCG00000020932	protein_coding	1.68772	3.61434	0.036764	0.457192	↑
ENSSSCG00000020958	protein_coding	1.89663	2.60888	0.0489347	0.505427	↑
ENSSSCG00000020976	protein_coding	1.74993	6.67184	0.00805814	0.219962	↑
ENSSSCG00000020978	protein_coding	2.05129	7.2396	0.00355259	0.14141	↑
ENSSSCG00000021006	protein_coding	3.88532	4.44427	0.00034553	0.0337124	↑
ENSSSCG00000021015	protein_coding	1.89386	7.83936	0.00533014	0.174159	↑
ENSSSCG00000021056	protein_coding	7.54871	-0.980245	0.030234	0.426864	↑
ENSSSCG00000021062	protein_coding	5.20354	-0.674982	0.0314318	0.432718	↑
ENSSSCG00000021073	protein_coding	8.23012	-0.343604	0.0111658	0.265236	↑
ENSSSCG00000021081	protein_coding	7.70642	-0.818394	0.0153169	0.313618	↑
ENSSSCG00000021084	protein_coding	1.7425	3.08415	0.0414683	0.476277	↑
ENSSSCG00000021102	protein_coding	1.5898	5.05592	0.0110629	0.26365	↑
ENSSSCG00000021105	protein_coding	5.02661	1.16912	0.0186382	0.345602	↑
ENSSSCG00000021164	protein_coding	7.54246	3.85445	0.00170795	0.0894752	↑
ENSSSCG00000021196	protein_coding	1.89431	4.47886	0.00457593	0.159718	↑
ENSSSCG00000021220	protein_coding	1.83753	3.23506	0.0471557	0.498732	↑
ENSSSCG00000021251	protein_coding	2.54499	3.86654	0.00213551	0.103692	↑
ENSSSCG00000021257	protein_coding	4.79742	2.01472	0.000859385	0.0597043	↑
ENSSSCG00000021262	protein_coding	2.52999	2.71487	0.0193473	0.351608	↑
ENSSSCG00000021273	protein_coding	1.42174	6.58794	0.02976	0.425127	↑
ENSSSCG00000021274	protein_coding	1.88188	4.62781	0.0285524	0.416839	↑
ENSSSCG00000021280	protein_coding	6.88764	-1.50664	0.040874	0.473958	↑
ENSSSCG00000021289	protein_coding	3.11755	3.91051	5.68661e-05	0.0110225	↑
ENSSSCG00000021305	protein_coding	2.94963	3.07478	0.0493061	0.506922	↑
ENSSSCG00000021311	protein_coding	10.5345	1.82415	1.31052e-05	0.00418719	↑
ENSSSCG00000021326	protein_coding	2.75808	2.60604	0.00781334	0.21533	↑
ENSSSCG00000021330	protein_coding	8.01028	-0.536808	0.0158445	0.317929	↑
ENSSSCG00000021345	protein_coding	2.64457	2.37782	0.0287099	0.417997	↑
ENSSSCG00000021361	protein_coding	1.72352	4.05665	0.0165029	0.325524	↑
ENSSSCG00000021364	protein_coding	8.4082	-0.191959	0.00595223	0.184304	↑
ENSSSCG00000021402	protein_coding	1.41855	4.14319	0.0414787	0.476277	↑
ENSSSCG00000021405	protein_coding	7.03863	-1.37949	0.034552	0.447284	↑
ENSSSCG00000021417	protein_coding	8.57117	-0.0371157	0.006007	0.185604	↑
ENSSSCG00000021419	protein_coding	1.95228	3.08552	0.0259199	0.399163	↑
ENSSSCG00000021433	protein_coding	2.69875	3.24108	0.00118428	0.0705594	↑
ENSSSCG00000021438	protein_coding	7.78617	-0.778255	0.031803	0.435622	↑
ENSSSCG00000021456	protein_coding	1.47957	3.97105	0.0283755	0.416045	↑
ENSSSCG00000021469	protein_coding	2.91676	3.33324	0.000669122	0.0504098	↑
ENSSSCG00000021475	protein_coding	1.49993	6.32109	0.0202942	0.356696	↑
ENSSSCG00000021521	protein_coding	1.34325	5.04214	0.0476402	0.500903	↑
ENSSSCG00000021522	protein_coding	6.75704	-1.58639	0.0438832	0.486012	↑
ENSSSCG00000021536	protein_coding	9.89446	1.2074	0.00170024	0.0894752	↑
ENSSSCG00000021571	protein_coding	2.06026	3.13948	0.022601	0.374622	↑
ENSSSCG00000021597	protein_coding	4.48656	0.371604	0.0313385	0.432718	↑
ENSSSCG00000021599	protein_coding	9.41834	0.739128	0.000457348	0.0405409	↑
ENSSSCG00000021610	protein_coding	3.51426	5.04577	1.02379e-06	0.000800897	↑
ENSSSCG00000021627	protein_coding	7.75976	-0.770355	0.0147459	0.306858	↑
ENSSSCG00000021629	protein_coding	6.8803	-1.51896	0.0433658	0.484759	↑
ENSSSCG00000021637	protein_coding	1.61763	3.42401	0.0498552	0.509325	↑
ENSSSCG00000021646	protein_coding	1.53539	5.86734	0.0206042	0.358722	↑
ENSSSCG00000021649	protein_coding	6.99524	-1.40477	0.0365682	0.457192	↑
ENSSSCG00000021653	protein_coding	7.9741	-0.592634	0.0113146	0.267239	↑
ENSSSCG00000021712	protein_coding	3.1322	6.48475	0.00578623	0.182232	↑
ENSSSCG00000021713	protein_coding	9.92884	1.22946	6.05134e-05	0.0113966	↑
ENSSSCG00000021724	protein_coding	4.48109	2.79089	0.00321979	0.13302	↑
ENSSSCG00000021730	protein_coding	3.02321	5.21209	3.89908e-05	0.00878804	↑
ENSSSCG00000021766	protein_coding	4.10841	4.29289	0.00115763	0.069398	↑
ENSSSCG00000021776	protein_coding	6.7139	-1.62692	0.0453718	0.490718	↑
ENSSSCG00000021789	protein_coding	2.76069	2.09256	0.0220155	0.369016	↑
ENSSSCG00000021798	protein_coding	1.43069	5.62088	0.0286276	0.417225	↑
ENSSSCG00000021801	protein_coding	8.03294	-0.547357	0.012091	0.275721	↑
ENSSSCG00000021810	protein_coding	3.26279	3.5386	0.000135405	0.0190094	↑
ENSSSCG00000021815	protein_coding	4.00381	1.7233	0.0290615	0.419754	↑
ENSSSCG00000021850	protein_coding	7.32503	-1.11445	0.0411695	0.475592	↑
ENSSSCG00000021886	protein_coding	6.06493	2.95844	4.32463e-06	0.00187865	↑
ENSSSCG00000021902	protein_coding	5.29325	2.64587	0.00150508	0.0831942	↑
ENSSSCG00000021903	protein_coding	3.4579	6.79656	0.000770561	0.0557315	↑
ENSSSCG00000021913	protein_coding	3.02561	3.92019	4.21944e-05	0.0093649	↑
ENSSSCG00000021945	protein_coding	6.70049	-1.64796	0.0467967	0.497206	↑
ENSSSCG00000021991	protein_coding	1.61405	4.66572	0.0155633	0.315554	↑
ENSSSCG00000022003	protein_coding	4.0575	1.57688	0.0179007	0.339507	↑
ENSSSCG00000022004	protein_coding	1.45202	4.11603	0.0288263	0.418271	↑
ENSSSCG00000022011	protein_coding	2.41779	5.39741	0.0119319	0.274765	↑
ENSSSCG00000022049	protein_coding	1.64957	5.8021	0.0388012	0.467528	↑
ENSSSCG00000022060	protein_coding	9.05775	0.405489	0.00121909	0.0717509	↑
ENSSSCG00000022064	protein_coding	8.97317	0.310136	0.00413107	0.152619	↑
ENSSSCG00000022118	protein_coding	2.69955	2.7715	0.0321577	0.437901	↑
ENSSSCG00000022126	protein_coding	1.55026	4.22773	0.0231799	0.380336	↑
ENSSSCG00000022129	protein_coding	2.62101	3.43462	0.00185193	0.0940003	↑
ENSSSCG00000022151	protein_coding	6.0253	-0.0159374	0.00943644	0.239016	↑
ENSSSCG00000022167	protein_coding	7.70218	-0.798755	0.0299743	0.425954	↑
ENSSSCG00000022174	protein_coding	1.38813	4.66462	0.028212	0.414901	↑
ENSSSCG00000022182	protein_coding	5.3075	-0.576607	0.0306943	0.429522	↑
ENSSSCG00000022204	protein_coding	3.43713	7.046	5.25337e-05	0.0105952	↑
ENSSSCG00000022208	protein_coding	2.02965	5.90774	0.00419626	0.153854	↑
ENSSSCG00000022216	protein_coding	3.14875	5.47521	0.00302108	0.127301	↑
ENSSSCG00000022228	protein_coding	7.3286	-1.1647	0.0347597	0.447524	↑
ENSSSCG00000022258	protein_coding	7.30359	-1.18934	0.0417008	0.477907	↑
ENSSSCG00000022264	protein_coding	8.58815	-0.0150288	0.0248028	0.391901	↑
ENSSSCG00000022289	protein_coding	3.15649	3.11892	0.0282546	0.414901	↑
ENSSSCG00000022312	protein_coding	2.34217	4.60872	0.00176263	0.0910276	↑
ENSSSCG00000022316	protein_coding	2.96506	2.39524	0.0050129	0.168131	↑
ENSSSCG00000022347	protein_coding	7.8037	-0.76034	0.0248247	0.391901	↑
ENSSSCG00000022383	protein_coding	1.40905	4.77963	0.0275794	0.410165	↑
ENSSSCG00000022397	protein_coding	3.79474	2.00453	0.0310248	0.430425	↑
ENSSSCG00000022410	protein_coding	2.49429	5.05191	0.000265147	0.0286585	↑
ENSSSCG00000022420	protein_coding	8.27879	-0.319939	0.00709783	0.204732	↑
ENSSSCG00000022506	protein_coding	3.51493	7.50239	7.96305e-07	0.000746857	↑
ENSSSCG00000022537	protein_coding	2.55258	5.98614	0.000136646	0.0190094	↑
ENSSSCG00000022540	protein_coding	7.29387	-1.1661	0.02589	0.398915	↑
ENSSSCG00000022547	protein_coding	6.79964	5.08999	0.000178652	0.0223497	↑
ENSSSCG00000022553	protein_coding	5.27721	2.43027	1.56518e-05	0.00494647	↑
ENSSSCG00000022579	protein_coding	3.00268	2.72512	0.00568993	0.181597	↑
ENSSSCG00000022592	protein_coding	1.99927	5.51437	0.00792731	0.217851	↑
ENSSSCG00000022603	protein_coding	6.86969	-1.48531	0.0486681	0.503993	↑
ENSSSCG00000022641	protein_coding	7.0966	-1.32902	0.0328944	0.44074	↑
ENSSSCG00000022645	protein_coding	3.43787	1.84693	0.008263	0.223278	↑
ENSSSCG00000022663	protein_coding	6.88764	-1.50664	0.0408998	0.473958	↑
ENSSSCG00000022689	protein_coding	1.57077	5.74018	0.0340643	0.443935	↑
ENSSSCG00000022704	protein_coding	7.332	-1.1227	0.0271507	0.408352	↑
ENSSSCG00000022719	protein_coding	3.5053	1.40772	0.0167807	0.328299	↑
ENSSSCG00000022734	protein_coding	2.46956	4.82217	0.000168757	0.0215202	↑
ENSSSCG00000022741	protein_coding	1.72859	5.13154	0.0198583	0.35553	↑
ENSSSCG00000022774	protein_coding	1.60133	5.86579	0.0122852	0.277538	↑
ENSSSCG00000022782	protein_coding	9.03154	0.376064	0.00127974	0.0745659	↑
ENSSSCG00000022823	protein_coding	1.61755	4.31015	0.0314665	0.432718	↑
ENSSSCG00000022843	protein_coding	2.77944	5.87945	0.00519837	0.171558	↑
ENSSSCG00000022846	protein_coding	2.19414	6.11849	0.0117038	0.271806	↑
ENSSSCG00000022857	protein_coding	8.23694	-0.330209	0.035626	0.451965	↑
ENSSSCG00000022861	protein_coding	5.93454	1.32613	0.00114635	0.0690067	↑
ENSSSCG00000022886	protein_coding	7.53846	-0.980667	0.0231586	0.380201	↑
ENSSSCG00000022899	protein_coding	8.089	-0.470035	0.0123847	0.278688	↑
ENSSSCG00000022912	protein_coding	1.67975	5.01177	0.0403528	0.473093	↑
ENSSSCG00000022913	protein_coding	5.05232	4.81244	0.000189892	0.0231008	↑
ENSSSCG00000022914	protein_coding	2.59552	3.45482	0.00109702	0.0672906	↑
ENSSSCG00000022936	protein_coding	9.95788	1.26059	3.49188e-05	0.008278	↑
ENSSSCG00000022946	protein_coding	2.82953	3.31781	0.00103872	0.0648597	↑
ENSSSCG00000022956	protein_coding	9.49566	0.822256	0.000461091	0.0406249	↑
ENSSSCG00000022958	protein_coding	1.8518	4.37212	0.00536166	0.174569	↑
ENSSSCG00000022959	protein_coding	6.6875	-1.64067	0.0491221	0.506637	↑
ENSSSCG00000022963	protein_coding	3.08129	4.44523	4.3719e-06	0.00187865	↑
ENSSSCG00000022967	protein_coding	7.03536	-1.38477	0.0349695	0.448297	↑
ENSSSCG00000022979	protein_coding	9.42772	0.759137	0.000756776	0.0550082	↑
ENSSSCG00000023023	protein_coding	7.5131	-0.991726	0.0205777	0.35869	↑
ENSSSCG00000023032	protein_coding	7.56723	5.39257	8.90697e-05	0.0147648	↑
ENSSSCG00000023044	protein_coding	2.21782	4.62802	0.0153639	0.314139	↑
ENSSSCG00000023045	protein_coding	3.39894	2.9861	0.000503085	0.0418796	↑
ENSSSCG00000023124	protein_coding	3.14952	1.96913	0.0142036	0.298605	↑
ENSSSCG00000023167	protein_coding	1.60477	5.27784	0.0123936	0.278688	↑
ENSSSCG00000023173	protein_coding	1.73634	4.37442	0.00814857	0.221213	↑
ENSSSCG00000023178	protein_coding	2.99745	2.64484	0.0271163	0.408352	↑
ENSSSCG00000023204	protein_coding	2.1024	4.86447	0.00163439	0.0871412	↑
ENSSSCG00000023211	protein_coding	7.50878	-0.969054	0.0257391	0.397987	↑
ENSSSCG00000023228	protein_coding	1.713	3.7801	0.0272609	0.408773	↑
ENSSSCG00000023242	protein_coding	6.76552	-1.59938	0.0437569	0.486012	↑
ENSSSCG00000023258	protein_coding	7.83375	-0.699822	0.0144968	0.303403	↑
ENSSSCG00000023280	protein_coding	6.67379	-1.66194	0.0484593	0.503728	↑
ENSSSCG00000023290	protein_coding	2.39771	2.72739	0.0115181	0.269419	↑
ENSSSCG00000023292	protein_coding	2.17763	3.07377	0.0141467	0.298487	↑
ENSSSCG00000023329	protein_coding	4.46303	2.34457	0.000163105	0.0211709	↑
ENSSSCG00000023362	protein_coding	4.09386	3.86984	1.28795e-06	0.000942551	↑
ENSSSCG00000023371	protein_coding	2.01105	5.20328	0.00267949	0.118477	↑
ENSSSCG00000023377	protein_coding	1.38424	4.53059	0.0266202	0.403957	↑
ENSSSCG00000023378	protein_coding	1.96564	3.2217	0.0257526	0.397987	↑
ENSSSCG00000023379	protein_coding	3.90224	7.97823	0.000576234	0.0460275	↑
ENSSSCG00000023384	protein_coding	6.79458	-1.55372	0.045031	0.490718	↑
ENSSSCG00000023400	protein_coding	1.95798	3.34353	0.0128491	0.285108	↑
ENSSSCG00000023412	protein_coding	7.15805	-1.27128	0.030906	0.429694	↑
ENSSSCG00000023423	protein_coding	2.69064	3.90853	0.000172119	0.0217581	↑
ENSSSCG00000023475	protein_coding	2.19261	3.4269	0.0059179	0.18381	↑
ENSSSCG00000023483	protein_coding	3.56304	3.31551	5.41792e-05	0.0106437	↑
ENSSSCG00000023496	protein_coding	2.23114	4.50017	0.00382983	0.147097	↑
ENSSSCG00000023587	protein_coding	10.7974	2.08183	3.68478e-05	0.00850278	↑
ENSSSCG00000023594	protein_coding	1.8836	8.22962	0.0115388	0.269687	↑
ENSSSCG00000023603	protein_coding	1.88122	2.68774	0.0452785	0.490718	↑
ENSSSCG00000023611	protein_coding	1.32179	5.95978	0.0406258	0.473093	↑
ENSSSCG00000023619	protein_coding	1.80532	3.6075	0.0298137	0.425127	↑
ENSSSCG00000023625	protein_coding	2.58148	2.25138	0.0201858	0.355914	↑
ENSSSCG00000023653	protein_coding	2.97926	4.66735	0.000294964	0.030537	↑
ENSSSCG00000023659	protein_coding	2.05241	3.73448	0.00716462	0.206377	↑
ENSSSCG00000023663	protein_coding	9.22462	0.558857	0.000721609	0.0533862	↑
ENSSSCG00000023675	protein_coding	7.35983	-1.11205	0.0238072	0.384701	↑
ENSSSCG00000023677	protein_coding	2.01996	5.33965	0.00399943	0.149657	↑
ENSSSCG00000023680	protein_coding	1.25844	4.61906	0.0454419	0.490718	↑
ENSSSCG00000023684	protein_coding	2.66343	2.03735	0.0462287	0.493973	↑
ENSSSCG00000023695	protein_coding	6.73553	-1.62002	0.045873	0.492162	↑
ENSSSCG00000023704	protein_coding	5.79771	2.34849	8.86579e-05	0.0147648	↑
ENSSSCG00000023732	protein_coding	8.80951	0.18225	0.00416573	0.153214	↑
ENSSSCG00000023747	protein_coding	2.58005	4.09354	0.000869054	0.0597043	↑
ENSSSCG00000023759	protein_coding	1.95926	4.65927	0.00389096	0.148075	↑
ENSSSCG00000023796	protein_coding	2.78813	3.17552	0.00475001	0.16344	↑
ENSSSCG00000023804	protein_coding	7.00847	-1.38364	0.0394363	0.470348	↑
ENSSSCG00000023834	protein_coding	7.5824	1.51707	0.000524336	0.0428232	↑
ENSSSCG00000023851	protein_coding	7.23278	-1.22811	0.0286327	0.417225	↑
ENSSSCG00000023861	protein_coding	1.595	3.5106	0.0325829	0.439197	↑
ENSSSCG00000023879	protein_coding	8.05998	-0.505772	0.0100188	0.249826	↑
ENSSSCG00000023890	protein_coding	2.27096	4.18248	0.000893841	0.0604269	↑
ENSSSCG00000023896	protein_coding	7.16909	-1.2732	0.0302345	0.426864	↑
ENSSSCG00000023904	protein_coding	9.32958	0.668704	0.00191774	0.0962018	↑
ENSSSCG00000023939	protein_coding	8.0378	-0.522269	0.010848	0.261098	↑
ENSSSCG00000023942	protein_coding	4.08052	2.20453	0.000892594	0.0604269	↑
ENSSSCG00000023985	protein_coding	2.23702	3.78608	0.00189664	0.0955893	↑
ENSSSCG00000024001	protein_coding	2.14144	3.87071	0.00332281	0.135689	↑
ENSSSCG00000024018	protein_coding	3.83606	3.55339	5.00707e-06	0.00210986	↑
ENSSSCG00000024026	protein_coding	1.73553	4.93734	0.0159343	0.31907	↑
ENSSSCG00000024034	protein_coding	7.81102	-0.74691	0.0176658	0.337472	↑
ENSSSCG00000024105	protein_coding	3.25637	1.15142	0.0485276	0.503728	↑
ENSSSCG00000024106	protein_coding	6.81128	-1.55302	0.0404719	0.473093	↑
ENSSSCG00000024107	protein_coding	1.68322	8.65024	0.0278602	0.412504	↑
ENSSSCG00000024112	protein_coding	8.30381	-0.289516	0.00675272	0.198921	↑
ENSSSCG00000024115	protein_coding	1.92533	6.87068	0.0308336	0.429694	↑
ENSSSCG00000024161	protein_coding	2.91222	5.34375	0.000510422	0.0420411	↑
ENSSSCG00000024204	protein_coding	3.35326	2.91622	0.00151851	0.0834485	↑
ENSSSCG00000024205	protein_coding	1.80285	3.33349	0.0257614	0.397987	↑
ENSSSCG00000024211	protein_coding	6.78646	-1.56645	0.0432648	0.484759	↑
ENSSSCG00000024231	protein_coding	7.31253	-1.17219	0.0302011	0.426864	↑
ENSSSCG00000024240	protein_coding	2.00017	3.6011	0.00726827	0.207588	↑
ENSSSCG00000024279	protein_coding	9.04519	0.374966	0.0157306	0.316747	↑
ENSSSCG00000024298	protein_coding	6.89136	-1.50057	0.0401076	0.472117	↑
ENSSSCG00000024303	protein_coding	4.19802	0.835865	0.0205628	0.35869	↑
ENSSSCG00000024310	protein_coding	2.28942	4.98579	0.0029868	0.126407	↑
ENSSSCG00000024324	protein_coding	2.46315	3.8059	0.00171591	0.0894863	↑
ENSSSCG00000024333	protein_coding	3.29627	7.76258	0.00145974	0.0814626	↑
ENSSSCG00000024341	protein_coding	1.92416	4.30265	0.00383632	0.147152	↑
ENSSSCG00000024348	protein_coding	10.3379	1.6292	4.03244e-06	0.00183192	↑
ENSSSCG00000024391	protein_coding	1.69763	6.58901	0.0102499	0.253201	↑
ENSSSCG00000024394	protein_coding	3.49818	0.951746	0.0284288	0.416468	↑
ENSSSCG00000024399	protein_coding	1.34874	4.10078	0.0416829	0.477891	↑
ENSSSCG00000024420	protein_coding	9.05902	0.416597	0.0057783	0.182232	↑
ENSSSCG00000024432	protein_coding	4.63901	0.131511	0.033711	0.442704	↑
ENSSSCG00000024480	protein_coding	1.59648	4.04613	0.0322838	0.438008	↑
ENSSSCG00000024498	protein_coding	7.99428	-0.570773	0.0105892	0.257409	↑
ENSSSCG00000024500	protein_coding	3.01624	3.4826	0.000344404	0.0337124	↑
ENSSSCG00000024503	protein_coding	6.6875	-1.64067	0.0491044	0.506637	↑
ENSSSCG00000024554	protein_coding	7.96808	-0.583362	0.0120139	0.275123	↑
ENSSSCG00000024563	protein_coding	1.36358	4.06118	0.0446647	0.489706	↑
ENSSSCG00000024569	protein_coding	7.77167	-0.751846	0.01587	0.318221	↑
ENSSSCG00000024570	protein_coding	1.48386	4.80421	0.0156787	0.316747	↑
ENSSSCG00000024576	protein_coding	1.65547	3.6781	0.0212065	0.363606	↑
ENSSSCG00000024578	protein_coding	2.0196	5.96161	0.00203266	0.0999995	↑
ENSSSCG00000024595	protein_coding	3.55779	2.67477	0.00579758	0.182232	↑
ENSSSCG00000024610	protein_coding	5.7479	-0.257444	0.0200125	0.355914	↑
ENSSSCG00000024661	protein_coding	2.43399	3.81816	0.000615372	0.0474588	↑
ENSSSCG00000024669	protein_coding	2.2729	6.3045	0.000836333	0.0587352	↑
ENSSSCG00000024671	protein_coding	1.86828	3.85922	0.0252704	0.394725	↑
ENSSSCG00000024676	protein_coding	8.71384	0.0879467	0.00323449	0.133394	↑
ENSSSCG00000024687	protein_coding	2.99745	3.76838	0.00136711	0.0778202	↑
ENSSSCG00000024688	protein_coding	6.74853	-1.59963	0.0448339	0.490608	↑
ENSSSCG00000024694	protein_coding	2.78138	2.58894	0.00692935	0.200936	↑
ENSSSCG00000024712	protein_coding	3.31811	3.80444	5.53374e-05	0.0107982	↑
ENSSSCG00000024718	protein_coding	10.9907	2.27185	0.000435454	0.0393194	↑
ENSSSCG00000024720	protein_coding	5.22655	0.663426	0.009953	0.248927	↑
ENSSSCG00000024741	protein_coding	7.77963	-0.774182	0.0182705	0.341437	↑
ENSSSCG00000024743	protein_coding	8.85403	0.221731	0.00319204	0.132395	↑
ENSSSCG00000024762	protein_coding	3.18307	1.36325	0.0478035	0.501958	↑
ENSSSCG00000024772	protein_coding	5.41223	-0.481639	0.0297971	0.425127	↑
ENSSSCG00000024777	protein_coding	1.86972	4.06466	0.0164822	0.325336	↑
ENSSSCG00000024797	protein_coding	1.9875	3.92221	0.0039446	0.14894	↑
ENSSSCG00000024802	protein_coding	5.73638	-0.267702	0.0200591	0.355914	↑
ENSSSCG00000024823	protein_coding	2.72415	7.9389	0.000120126	0.0174633	↑
ENSSSCG00000024850	protein_coding	4.70806	1.72545	0.00086839	0.0597043	↑
ENSSSCG00000024863	protein_coding	1.88636	3.32369	0.0347262	0.447524	↑
ENSSSCG00000024867	protein_coding	11.6882	2.9539	7.89436e-07	0.000746857	↑
ENSSSCG00000024883	protein_coding	3.37365	2.44545	0.00233488	0.109149	↑
ENSSSCG00000024895	protein_coding	1.35761	4.34006	0.0335117	0.442704	↑
ENSSSCG00000024914	protein_coding	1.77753	3.89465	0.0196496	0.353972	↑
ENSSSCG00000024931	protein_coding	2.27852	2.40072	0.0324608	0.439136	↑
ENSSSCG00000024967	protein_coding	2.46596	1.93185	0.0448974	0.490718	↑
ENSSSCG00000024992	protein_coding	7.27564	-1.19566	0.02814	0.41448	↑
ENSSSCG00000024995	protein_coding	1.67863	3.89155	0.0284636	0.416591	↑
ENSSSCG00000025044	protein_coding	9.33732	0.668575	0.000522066	0.0428232	↑
ENSSSCG00000025047	protein_coding	1.24022	4.68845	0.0464373	0.494928	↑
ENSSSCG00000025094	protein_coding	4.14563	2.48211	0.000945118	0.0617513	↑
ENSSSCG00000025096	protein_coding	4.33819	0.527456	0.0357948	0.45269	↑
ENSSSCG00000025105	protein_coding	1.62957	4.79182	0.00847473	0.225821	↑
ENSSSCG00000025115	protein_coding	1.6721	3.43808	0.0279015	0.412633	↑
ENSSSCG00000025116	protein_coding	1.8656	4.20608	0.0055652	0.178794	↑
ENSSSCG00000025124	protein_coding	2.29771	3.45919	0.00339891	0.137254	↑
ENSSSCG00000025133	protein_coding	1.89042	3.78084	0.00731616	0.208219	↑
ENSSSCG00000025146	protein_coding	3.0278	6.29343	2.37355e-05	0.00657248	↑
ENSSSCG00000025164	protein_coding	1.59975	3.58817	0.0290277	0.419474	↑
ENSSSCG00000025172	protein_coding	1.85703	3.15592	0.0261791	0.401371	↑
ENSSSCG00000025173	protein_coding	1.83685	5.10262	0.0340632	0.443935	↑
ENSSSCG00000025181	protein_coding	2.18961	5.82038	0.0224765	0.37322	↑
ENSSSCG00000025196	protein_coding	1.42207	4.78057	0.0229908	0.378301	↑
ENSSSCG00000025206	protein_coding	1.30079	4.73042	0.0492444	0.506637	↑
ENSSSCG00000025217	protein_coding	1.92078	4.08671	0.0132752	0.289773	↑
ENSSSCG00000025229	protein_coding	6.62135	1.36754	0.000325502	0.0323003	↑
ENSSSCG00000025238	protein_coding	7.72383	-0.803108	0.0152785	0.313054	↑
ENSSSCG00000025249	protein_coding	7.57714	-0.918563	0.0200981	0.355914	↑
ENSSSCG00000025258	protein_coding	3.64264	0.861313	0.0289793	0.4194	↑
ENSSSCG00000025288	protein_coding	5.42163	-0.48709	0.023498	0.382793	↑
ENSSSCG00000025325	protein_coding	1.72131	4.27549	0.00803453	0.219962	↑
ENSSSCG00000025340	protein_coding	1.30738	4.6579	0.0406267	0.473093	↑
ENSSSCG00000025343	protein_coding	2.97826	2.33594	0.0196056	0.353618	↑
ENSSSCG00000025346	protein_coding	7.03656	-1.36099	0.0380436	0.464485	↑
ENSSSCG00000025376	protein_coding	8.07169	-0.513554	0.0116113	0.270511	↑
ENSSSCG00000025459	protein_coding	7.46724	-1.02031	0.0210482	0.363246	↑
ENSSSCG00000025483	protein_coding	2.22307	4.62536	0.0115731	0.270055	↑
ENSSSCG00000025495	protein_coding	8.76972	0.122799	0.00379979	0.146257	↑
ENSSSCG00000025518	protein_coding	10.5662	1.85379	2.72459e-06	0.00144369	↑
ENSSSCG00000025525	protein_coding	4.52418	3.50896	1.96801e-05	0.00589897	↑
ENSSSCG00000025532	protein_coding	7.08515	-1.32651	0.0347019	0.447524	↑
ENSSSCG00000025538	protein_coding	8.81393	0.189177	0.00722837	0.207468	↑
ENSSSCG00000025554	protein_coding	1.36049	5.1711	0.0497507	0.508615	↑
ENSSSCG00000025561	protein_coding	5.18614	2.52413	0.00102599	0.0642904	↑
ENSSSCG00000025582	protein_coding	2.30193	3.08428	0.00716909	0.206377	↑
ENSSSCG00000025588	protein_coding	3.58905	1.35022	0.040401	0.473093	↑
ENSSSCG00000025593	protein_coding	5.28662	5.57616	0.000161611	0.0211709	↑
ENSSSCG00000025610	protein_coding	2.15314	4.81506	0.000650479	0.0499015	↑
ENSSSCG00000025618	protein_coding	3.29848	5.87111	0.00380253	0.146257	↑
ENSSSCG00000025626	protein_coding	1.65126	5.56136	0.0113005	0.267123	↑
ENSSSCG00000025655	protein_coding	3.34373	2.50084	0.012038	0.275348	↑
ENSSSCG00000025669	protein_coding	1.67438	3.6605	0.0250814	0.393669	↑
ENSSSCG00000025685	protein_coding	5.19382	-0.664144	0.04404	0.486584	↑
ENSSSCG00000025689	protein_coding	1.46357	4.82901	0.0261368	0.401371	↑
ENSSSCG00000025716	protein_coding	9.66054	0.964471	0.00304256	0.128021	↑
ENSSSCG00000025717	protein_coding	5.9934	2.87198	1.04674e-06	0.000800897	↑
ENSSSCG00000025719	protein_coding	1.28131	4.72358	0.0361437	0.454139	↑
ENSSSCG00000025729	protein_coding	1.80723	6.87298	0.00612086	0.187244	↑
ENSSSCG00000025756	protein_coding	1.49899	4.05987	0.0252153	0.394276	↑
ENSSSCG00000025777	protein_coding	1.32742	5.98435	0.0408964	0.473958	↑
ENSSSCG00000025794	protein_coding	2.29102	3.43604	0.00439793	0.156795	↑
ENSSSCG00000025795	protein_coding	4.08884	0.943427	0.0272009	0.408352	↑
ENSSSCG00000025814	protein_coding	1.75054	4.52016	0.00616268	0.187448	↑
ENSSSCG00000025858	protein_coding	4.40241	3.57693	6.0343e-05	0.0113966	↑
ENSSSCG00000025893	protein_coding	1.96958	5.19304	0.00258715	0.116228	↑
ENSSSCG00000025924	protein_coding	1.89797	7.59626	0.01127	0.266621	↑
ENSSSCG00000025955	protein_coding	2.04953	3.88655	0.00590342	0.183771	↑
ENSSSCG00000025991	protein_coding	2.3046	2.13966	0.0367318	0.457192	↑
ENSSSCG00000025996	protein_coding	3.0993	2.03837	0.0085966	0.227017	↑
ENSSSCG00000026003	protein_coding	6.2247	0.244266	0.0112395	0.266115	↑
ENSSSCG00000026007	protein_coding	1.61596	4.95429	0.0387463	0.467253	↑
ENSSSCG00000026009	protein_coding	5.23426	-0.712872	0.0322795	0.438008	↑
ENSSSCG00000026030	protein_coding	4.6903	1.30468	0.00838483	0.225313	↑
ENSSSCG00000026050	protein_coding	7.25871	-1.22661	0.043096	0.484086	↑
ENSSSCG00000026052	protein_coding	1.92775	4.61684	0.00266967	0.118324	↑
ENSSSCG00000026063	protein_coding	1.46426	3.79682	0.0336265	0.442704	↑
ENSSSCG00000026113	protein_coding	2.05121	5.90852	0.00278287	0.121855	↑
ENSSSCG00000026127	protein_coding	9.34724	0.685831	0.0022506	0.107021	↑
ENSSSCG00000026142	protein_coding	3.77894	0.915285	0.0219745	0.369016	↑
ENSSSCG00000026175	protein_coding	8.39633	-0.18937	0.0184911	0.343972	↑
ENSSSCG00000026182	protein_coding	2.11512	7.6607	0.0343642	0.446044	↑
ENSSSCG00000026254	protein_coding	7.82569	-0.71229	0.0135599	0.291949	↑
ENSSSCG00000026279	protein_coding	1.3848	4.76521	0.0300747	0.426795	↑
ENSSSCG00000026308	protein_coding	2.39359	5.143	0.00201157	0.0991296	↑
ENSSSCG00000026336	protein_coding	10.7487	2.02679	1.30932e-05	0.00418719	↑
ENSSSCG00000026367	protein_coding	1.44117	5.28296	0.0339642	0.443612	↑
ENSSSCG00000026378	protein_coding	7.06107	-1.34367	0.0354571	0.451869	↑
ENSSSCG00000026399	protein_coding	5.17227	0.00813827	0.0187227	0.346045	↑
ENSSSCG00000026407	protein_coding	8.17239	-0.415531	0.00849691	0.225821	↑
ENSSSCG00000026471	protein_coding	7.5123	-0.978546	0.0205766	0.35869	↑
ENSSSCG00000026490	protein_coding	2.62214	1.66261	0.036915	0.458229	↑
ENSSSCG00000026516	protein_coding	3.25853	3.14696	0.0250024	0.393184	↑
ENSSSCG00000026530	protein_coding	7.77311	-0.760901	0.0141157	0.298187	↑
ENSSSCG00000026551	protein_coding	1.9048	3.07733	0.0234823	0.382793	↑
ENSSSCG00000026560	protein_coding	7.69066	-0.858087	0.0263027	0.402078	↑
ENSSSCG00000026570	protein_coding	2.8073	4.34216	4.35659e-05	0.00936533	↑
ENSSSCG00000026600	protein_coding	7.03342	-1.36608	0.036914	0.458229	↑
ENSSSCG00000026631	protein_coding	2.76596	9.83647	0.000107669	0.0165441	↑
ENSSSCG00000026647	protein_coding	1.62894	8.29784	0.0227289	0.375907	↑
ENSSSCG00000026654	protein_coding	7.66523	1.58502	2.31087e-05	0.00646044	↑
ENSSSCG00000026662	protein_coding	7.93519	-0.604667	0.0156242	0.316567	↑
ENSSSCG00000026672	protein_coding	8.23859	-0.345609	0.00764018	0.212572	↑
ENSSSCG00000026688	protein_coding	9.51881	0.832246	0.000530429	0.0431995	↑
ENSSSCG00000026725	protein_coding	9.34724	0.685831	0.0022527	0.107021	↑
ENSSSCG00000026732	protein_coding	4.07275	1.88136	0.0142541	0.299234	↑
ENSSSCG00000026745	protein_coding	2.91638	2.51226	0.00501175	0.168131	↑
ENSSSCG00000026755	protein_coding	4.05247	4.16545	5.66161e-08	0.000109741	↑
ENSSSCG00000026767	protein_coding	8.48191	-0.146574	0.00848916	0.225821	↑
ENSSSCG00000026771	protein_coding	1.38066	5.88483	0.032647	0.439654	↑
ENSSSCG00000026783	protein_coding	6.97132	-1.44347	0.0388935	0.467545	↑
ENSSSCG00000026797	protein_coding	7.82218	-0.728541	0.0140839	0.298187	↑
ENSSSCG00000026805	protein_coding	2.29931	4.48506	0.00240617	0.1114	↑
ENSSSCG00000026832	protein_coding	2.37032	2.49468	0.0338348	0.443329	↑
ENSSSCG00000026849	protein_coding	4.20157	2.09447	0.00554464	0.178451	↑
ENSSSCG00000026852	protein_coding	6.78646	-1.56645	0.0432607	0.484759	↑
ENSSSCG00000026877	protein_coding	1.47286	4.48422	0.0389152	0.467545	↑
ENSSSCG00000026886	protein_coding	8.39234	-0.209186	0.0057933	0.182232	↑
ENSSSCG00000026904	protein_coding	2.74128	2.70753	0.0375517	0.462634	↑
ENSSSCG00000026931	protein_coding	2.07793	5.67519	0.0140838	0.298187	↑
ENSSSCG00000026943	protein_coding	3.01903	5.42528	0.000388772	0.0366998	↑
ENSSSCG00000026982	protein_coding	1.50965	3.97922	0.0411971	0.475592	↑
ENSSSCG00000027004	protein_coding	6.8239	-1.55875	0.0430905	0.484086	↑
ENSSSCG00000027014	protein_coding	3.66743	3.78988	0.00178604	0.0917477	↑
ENSSSCG00000027035	protein_coding	4.08075	1.8854	0.0104212	0.254833	↑
ENSSSCG00000027047	protein_coding	7.38914	-1.08186	0.0232178	0.380568	↑
ENSSSCG00000027060	protein_coding	1.49211	5.93666	0.0195839	0.353446	↑
ENSSSCG00000027062	protein_coding	4.79772	0.649832	0.0158389	0.317929	↑
ENSSSCG00000027123	protein_coding	7.79444	-0.749968	0.014113	0.298187	↑
ENSSSCG00000027140	protein_coding	1.67649	5.65672	0.00873445	0.228787	↑
ENSSSCG00000027165	protein_coding	1.22957	4.92733	0.0468672	0.497206	↑
ENSSSCG00000027166	protein_coding	2.28024	3.96029	0.00285463	0.12353	↑
ENSSSCG00000027173	protein_coding	5.61176	2.15079	0.000248454	0.0275717	↑
ENSSSCG00000027189	protein_coding	2.01411	5.24803	0.011449	0.269102	↑
ENSSSCG00000027216	protein_coding	8.74802	0.10813	0.00290817	0.124346	↑
ENSSSCG00000027222	protein_coding	4.95339	1.04081	0.00372053	0.144812	↑
ENSSSCG00000027229	protein_coding	2.59964	3.91203	0.000764306	0.0554169	↑
ENSSSCG00000027281	protein_coding	1.86452	4.89347	0.00326082	0.134099	↑
ENSSSCG00000027283	protein_coding	9.09527	0.429774	0.00154087	0.0838967	↑
ENSSSCG00000027285	protein_coding	5.71837	2.05829	0.000256706	0.0283791	↑
ENSSSCG00000027286	protein_coding	1.99969	3.82878	0.00573688	0.182062	↑
ENSSSCG00000027318	protein_coding	9.34707	0.6774	0.000492449	0.0415925	↑
ENSSSCG00000027330	protein_coding	3.13044	3.28556	0.000956196	0.0621955	↑
ENSSSCG00000027331	protein_coding	1.95862	8.73651	0.00376527	0.145967	↑
ENSSSCG00000027343	protein_coding	7.56571	-0.92243	0.0229793	0.378301	↑
ENSSSCG00000027357	protein_coding	3.01105	3.83753	0.000453182	0.0402944	↑
ENSSSCG00000027360	protein_coding	6.75704	-1.58639	0.0438902	0.486012	↑
ENSSSCG00000027361	protein_coding	7.46946	-1.0168	0.0211911	0.363606	↑
ENSSSCG00000027372	protein_coding	3.21771	7.19337	0.0031461	0.13133	↑
ENSSSCG00000027402	protein_coding	1.30711	5.84618	0.0482767	0.50309	↑
ENSSSCG00000027408	protein_coding	7.20565	-1.23398	0.0291767	0.420761	↑
ENSSSCG00000027435	protein_coding	3.47794	5.2845	2.0113e-06	0.00126918	↑
ENSSSCG00000027438	protein_coding	1.91815	3.37298	0.034166	0.444463	↑
ENSSSCG00000027452	protein_coding	2.44736	2.19012	0.0398935	0.470931	↑
ENSSSCG00000027454	protein_coding	6.98278	1.71812	5.29753e-05	0.0105952	↑
ENSSSCG00000027458	protein_coding	3.08985	2.03159	0.0219173	0.368887	↑
ENSSSCG00000027466	protein_coding	1.71652	5.31748	0.0105137	0.256019	↑
ENSSSCG00000027475	protein_coding	2.32812	2.91333	0.0299188	0.425855	↑
ENSSSCG00000027502	protein_coding	6.77394	-1.58601	0.0426567	0.48231	↑
ENSSSCG00000027507	protein_coding	7.20267	-1.25832	0.0319894	0.436766	↑
ENSSSCG00000027544	protein_coding	2.39773	7.73782	0.000665154	0.0503629	↑
ENSSSCG00000027559	protein_coding	7.18905	-1.2413	0.0309225	0.429694	↑
ENSSSCG00000027628	protein_coding	1.76599	5.15402	0.0126681	0.283545	↑
ENSSSCG00000027638	protein_coding	9.96009	1.26316	3.52249e-05	0.008278	↑
ENSSSCG00000027641	protein_coding	9.53538	0.863875	0.00156094	0.0846721	↑
ENSSSCG00000027645	protein_coding	4.48466	1.10972	0.0297076	0.424851	↑
ENSSSCG00000027646	protein_coding	1.37739	4.70356	0.0432771	0.484759	↑
ENSSSCG00000027664	protein_coding	2.57068	3.22848	0.00365692	0.143314	↑
ENSSSCG00000027667	protein_coding	1.55005	3.53882	0.0385453	0.466432	↑
ENSSSCG00000027673	protein_coding	9.28673	0.624729	0.000912758	0.061152	↑
ENSSSCG00000027709	protein_coding	2.60788	5.73665	0.00846015	0.225821	↑
ENSSSCG00000027710	protein_coding	7.93922	-0.598034	0.0182963	0.341661	↑
ENSSSCG00000027712	protein_coding	8.79961	0.161076	0.00228365	0.107787	↑
ENSSSCG00000027734	protein_coding	2.77299	4.88537	0.000118853	0.0173948	↑
ENSSSCG00000027736	protein_coding	8.88843	0.2387	0.00206954	0.10147	↑
ENSSSCG00000027750	protein_coding	8.86121	0.228057	0.00300976	0.127008	↑
ENSSSCG00000027806	protein_coding	1.85865	6.42524	0.0287858	0.41827	↑
ENSSSCG00000027807	protein_coding	4.77071	0.62856	0.0182726	0.341437	↑
ENSSSCG00000027812	protein_coding	1.49856	4.79445	0.028761	0.41827	↑
ENSSSCG00000027851	protein_coding	5.2962	-0.651874	0.0347025	0.447524	↑
ENSSSCG00000027860	protein_coding	2.03479	4.19228	0.0252787	0.394725	↑
ENSSSCG00000027868	protein_coding	10.6554	1.9373	1.04481e-06	0.000800897	↑
ENSSSCG00000027890	protein_coding	2.62511	4.3126	0.000136442	0.0190094	↑
ENSSSCG00000027922	protein_coding	1.51792	4.47352	0.037351	0.461139	↑
ENSSSCG00000027944	protein_coding	8.84939	0.201671	0.0023331	0.109149	↑
ENSSSCG00000027961	protein_coding	1.46158	3.96915	0.0305758	0.429522	↑
ENSSSCG00000027969	protein_coding	1.34068	9.86956	0.0492503	0.506637	↑
ENSSSCG00000027970	protein_coding	2.98441	2.62942	0.0151889	0.311657	↑
ENSSSCG00000027982	protein_coding	8.33632	10.0776	8.76976e-06	0.00322803	↑
ENSSSCG00000027988	protein_coding	2.58049	2.16033	0.0337084	0.442704	↑
ENSSSCG00000027991	protein_coding	9.19953	0.541185	0.000988698	0.0631789	↑
ENSSSCG00000027992	protein_coding	2.18577	2.92682	0.033748	0.44299	↑
ENSSSCG00000028018	protein_coding	2.03838	4.84781	0.0015269	0.0834485	↑
ENSSSCG00000028022	protein_coding	3.52564	7.13847	1.01885e-06	0.000800897	↑
ENSSSCG00000028038	protein_coding	8.57336	-0.0647836	0.0100398	0.250134	↑
ENSSSCG00000028039	protein_coding	8.03254	-0.538848	0.0102668	0.253402	↑
ENSSSCG00000028049	protein_coding	9.57951	0.899664	0.00024106	0.0271033	↑
ENSSSCG00000028050	protein_coding	6.76972	-1.59266	0.0429706	0.483689	↑
ENSSSCG00000028052	protein_coding	1.7051	7.90527	0.0497374	0.508615	↑
ENSSSCG00000028056	protein_coding	9.46579	0.783375	0.000448623	0.0401345	↑
ENSSSCG00000028102	protein_coding	3.06101	4.09509	0.00042832	0.0389879	↑
ENSSSCG00000028103	protein_coding	9.38313	0.712661	0.000471189	0.0412646	↑
ENSSSCG00000028106	protein_coding	3.07978	1.73453	0.0211231	0.363606	↑
ENSSSCG00000028109	protein_coding	1.34564	3.86119	0.0480513	0.50237	↑
ENSSSCG00000028118	protein_coding	1.4629	5.08557	0.0211977	0.363606	↑
ENSSSCG00000028131	protein_coding	6.76972	-1.59266	0.0429661	0.483689	↑
ENSSSCG00000028148	protein_coding	1.82662	6.47121	0.00526425	0.173059	↑
ENSSSCG00000028177	protein_coding	8.78949	0.166681	0.00748238	0.210397	↑
ENSSSCG00000028197	protein_coding	3.31565	5.52568	2.84794e-05	0.00726351	↑
ENSSSCG00000028221	protein_coding	1.50965	3.97922	0.0411967	0.475592	↑
ENSSSCG00000028259	protein_coding	8.40744	-0.204564	0.0058668	0.183416	↑
ENSSSCG00000028265	protein_coding	3.82769	2.03555	0.016903	0.329173	↑
ENSSSCG00000028266	protein_coding	1.88506	4.5714	0.00268128	0.118477	↑
ENSSSCG00000028280	protein_coding	7.38438	-1.0894	0.0228406	0.377538	↑
ENSSSCG00000028304	protein_coding	1.89688	7.01295	0.00558653	0.179083	↑
ENSSSCG00000028326	protein_coding	2.66827	3.58849	0.00175011	0.0906932	↑
ENSSSCG00000028355	protein_coding	1.68483	9.85721	0.0128215	0.285003	↑
ENSSSCG00000028366	protein_coding	3.82009	1.36266	0.0338963	0.443612	↑
ENSSSCG00000028371	protein_coding	6.66454	-1.67652	0.049465	0.507927	↑
ENSSSCG00000028471	protein_coding	9.44473	0.778171	0.00212331	0.103409	↑
ENSSSCG00000028501	protein_coding	1.53547	3.64524	0.040541	0.473093	↑
ENSSSCG00000028511	protein_coding	7.07268	-1.34638	0.0329396	0.440861	↑
ENSSSCG00000028520	protein_coding	10.5662	1.85379	2.73097e-06	0.00144369	↑
ENSSSCG00000028557	protein_coding	8.17077	-0.410492	0.00825392	0.223278	↑
ENSSSCG00000028572	protein_coding	1.39463	4.96493	0.0295672	0.423272	↑
ENSSSCG00000028593	protein_coding	4.17214	2.9717	2.18638e-05	0.00628441	↑
ENSSSCG00000028606	protein_coding	2.16984	3.20632	0.0153447	0.313967	↑
ENSSSCG00000028608	protein_coding	6.87909	-1.49578	0.0397004	0.470825	↑
ENSSSCG00000028651	protein_coding	3.51439	1.45534	0.0480361	0.50237	↑
ENSSSCG00000028660	protein_coding	9.77187	1.08356	0.000101871	0.0160103	↑
ENSSSCG00000028674	protein_coding	2.24304	3.01591	0.0339896	0.443612	↑
ENSSSCG00000028723	protein_coding	2.11399	3.626	0.00422018	0.154342	↑
ENSSSCG00000028736	protein_coding	4.48039	8.10347	0.000488441	0.0415925	↑
ENSSSCG00000028755	protein_coding	2.51761	4.02002	0.0105807	0.257409	↑
ENSSSCG00000028774	protein_coding	4.41719	0.317317	0.045414	0.490718	↑
ENSSSCG00000028800	protein_coding	9.8782	1.18563	6.13328e-05	0.0114311	↑
ENSSSCG00000028810	protein_coding	7.02699	-1.37637	0.0352988	0.450772	↑
ENSSSCG00000028813	protein_coding	8.4796	-0.115234	0.0133797	0.290527	↑
ENSSSCG00000028846	protein_coding	3.12166	3.13481	0.0056268	0.179977	↑
ENSSSCG00000028872	protein_coding	2.26343	5.98565	0.0190147	0.349085	↑
ENSSSCG00000028878	protein_coding	2.70979	5.10864	0.000102494	0.0160196	↑
ENSSSCG00000028889	protein_coding	1.63347	5.68187	0.0236919	0.383879	↑
ENSSSCG00000028895	protein_coding	2.58713	3.44665	0.00259607	0.116303	↑
ENSSSCG00000028912	protein_coding	1.56942	5.52724	0.0327044	0.439765	↑
ENSSSCG00000028923	protein_coding	7.02699	-1.37637	0.0352894	0.450772	↑
ENSSSCG00000028926	protein_coding	7.37474	-1.10473	0.0239611	0.386089	↑
ENSSSCG00000028936	protein_coding	7.25444	-1.19331	0.0278573	0.412504	↑
ENSSSCG00000028978	protein_coding	1.78993	4.07765	0.0135802	0.291949	↑
ENSSSCG00000028985	protein_coding	7.64906	-0.871283	0.0165508	0.325871	↑
ENSSSCG00000029023	protein_coding	1.67273	3.388	0.0294172	0.422372	↑
ENSSSCG00000029057	protein_coding	5.23292	0.145414	0.0292857	0.421248	↑
ENSSSCG00000029067	protein_coding	1.84023	3.54286	0.0154317	0.314664	↑
ENSSSCG00000029069	protein_coding	8.89883	0.252887	0.00182615	0.0929867	↑
ENSSSCG00000029070	protein_coding	1.32965	4.86503	0.0341473	0.444463	↑
ENSSSCG00000029074	protein_coding	1.53178	6.24184	0.0191304	0.34992	↑
ENSSSCG00000029122	protein_coding	2.97215	2.97843	0.00164988	0.0876972	↑
ENSSSCG00000029124	protein_coding	7.16328	-1.2826	0.0307493	0.429522	↑
ENSSSCG00000029126	protein_coding	2.78869	1.5241	0.0383252	0.465957	↑
ENSSSCG00000029143	protein_coding	2.63979	4.63266	0.000312862	0.0318058	↑
ENSSSCG00000029154	protein_coding	1.81762	4.66869	0.0039368	0.14894	↑
ENSSSCG00000029172	protein_coding	7.58627	-0.917804	0.0179998	0.34034	↑
ENSSSCG00000029184	protein_coding	2.58148	2.25138	0.0201795	0.355914	↑
ENSSSCG00000029189	protein_coding	3.04286	5.74015	1.64227e-05	0.00513429	↑
ENSSSCG00000029201	protein_coding	1.84343	4.20514	0.00533323	0.174159	↑
ENSSSCG00000029228	protein_coding	1.71171	4.09868	0.0204394	0.358132	↑
ENSSSCG00000029236	protein_coding	1.89671	4.24126	0.00592091	0.18381	↑
ENSSSCG00000029289	protein_coding	9.93131	1.2316	6.47081e-05	0.0119075	↑
ENSSSCG00000029321	protein_coding	2.61517	2.52243	0.00993408	0.248927	↑
ENSSSCG00000029328	protein_coding	2.38077	4.26318	0.00039647	0.037185	↑
ENSSSCG00000029331	protein_coding	1.91245	4.96598	0.00526767	0.173059	↑
ENSSSCG00000029333	protein_coding	1.71845	4.57031	0.00737315	0.208333	↑
ENSSSCG00000029375	protein_coding	2.04254	4.19206	0.00222955	0.106577	↑
ENSSSCG00000029391	protein_coding	1.74023	4.12916	0.00969111	0.243956	↑
ENSSSCG00000029399	protein_coding	1.86584	6.25434	0.00608319	0.187244	↑
ENSSSCG00000029414	protein_coding	3.58622	1.81485	0.0487784	0.504197	↑
ENSSSCG00000029426	protein_coding	1.95032	2.85291	0.0394384	0.470348	↑
ENSSSCG00000029430	protein_coding	1.33869	4.43364	0.0383583	0.465972	↑
ENSSSCG00000029435	protein_coding	1.74264	3.24378	0.0421276	0.480526	↑
ENSSSCG00000029463	protein_coding	9.86458	1.16791	7.27445e-05	0.0130831	↑
ENSSSCG00000029475	protein_coding	3.11258	4.38955	0.000694959	0.0520772	↑
ENSSSCG00000029488	protein_coding	2.03151	4.63795	0.00485866	0.165091	↑
ENSSSCG00000029502	protein_coding	2.6884	5.98497	0.000205781	0.0243673	↑
ENSSSCG00000029531	protein_coding	2.96054	3.57845	0.0198805	0.355708	↑
ENSSSCG00000029554	protein_coding	8.7404	0.123755	0.020603	0.358722	↑
ENSSSCG00000029557	protein_coding	3.84187	1.56866	0.0151724	0.311657	↑
ENSSSCG00000029566	protein_coding	7.16909	-1.2732	0.0302155	0.426864	↑
ENSSSCG00000029570	protein_coding	1.91685	5.30396	0.00374758	0.145475	↑
ENSSSCG00000029592	protein_coding	3.71162	2.49396	0.00289528	0.123977	↑
ENSSSCG00000029616	protein_coding	3.86172	4.04642	3.3791e-06	0.00158464	↑
ENSSSCG00000029624	protein_coding	1.58227	4.77222	0.0170798	0.33027	↑
ENSSSCG00000029627	protein_coding	1.50972	4.44859	0.0308094	0.429694	↑
ENSSSCG00000029646	protein_coding	6.1188	0.147882	0.0129813	0.285933	↑
ENSSSCG00000029688	protein_coding	4.11976	1.52041	0.017039	0.330192	↑
ENSSSCG00000029691	protein_coding	1.41055	4.24093	0.0424576	0.48231	↑
ENSSSCG00000029711	protein_coding	1.57062	4.28675	0.0165419	0.325871	↑
ENSSSCG00000029722	protein_coding	10.6264	1.91496	7.37964e-05	0.0130831	↑
ENSSSCG00000029723	protein_coding	3.28822	6.14552	1.23946e-05	0.00404913	↑
ENSSSCG00000029745	protein_coding	2.26836	3.2309	0.00659294	0.196202	↑
ENSSSCG00000029761	protein_coding	2.60141	3.56425	0.000928984	0.0613868	↑
ENSSSCG00000029763	protein_coding	2.04583	5.193	0.0179529	0.339893	↑
ENSSSCG00000029773	protein_coding	3.44777	6.99263	8.81039e-05	0.0147648	↑
ENSSSCG00000029781	protein_coding	1.85377	4.52174	0.0355751	0.451951	↑
ENSSSCG00000029796	protein_coding	9.19408	0.534104	0.00087272	0.0597043	↑
ENSSSCG00000029843	protein_coding	3.21564	2.12199	0.00604668	0.186632	↑
ENSSSCG00000029852	protein_coding	2.31429	4.12551	0.000772675	0.0557457	↑
ENSSSCG00000029879	protein_coding	4.0824	2.55223	0.00380293	0.146257	↑
ENSSSCG00000029881	protein_coding	1.93414	4.20537	0.00534298	0.174159	↑
ENSSSCG00000029890	protein_coding	9.39407	0.718232	0.00042488	0.0388471	↑
ENSSSCG00000029892	protein_coding	7.27559	-1.17758	0.0265915	0.403957	↑
ENSSSCG00000029900	protein_coding	1.37685	4.62848	0.0423596	0.481849	↑
ENSSSCG00000029901	protein_coding	1.47297	4.10786	0.0257456	0.397987	↑
ENSSSCG00000029909	protein_coding	9.57621	0.89561	0.000224003	0.0257427	↑
ENSSSCG00000029916	protein_coding	4.80603	0.653091	0.0166657	0.326961	↑
ENSSSCG00000029945	protein_coding	10.9887	2.26595	2.46142e-08	5.96382e-05	↑
ENSSSCG00000029949	protein_coding	3.76619	2.06565	0.00742327	0.209342	↑
ENSSSCG00000029968	protein_coding	6.1919	0.137028	0.00660882	0.196356	↑
ENSSSCG00000029980	protein_coding	8.30106	-0.280044	0.0102199	0.252889	↑
ENSSSCG00000029993	protein_coding	7.22657	2.03959	0.00050414	0.0418796	↑
ENSSSCG00000030007	protein_coding	2.13704	2.55277	0.0350576	0.448834	↑
ENSSSCG00000030008	protein_coding	1.93922	3.85478	0.022453	0.37322	↑
ENSSSCG00000030036	protein_coding	7.73443	-0.786627	0.0157464	0.316835	↑
ENSSSCG00000030048	protein_coding	6.99184	-1.41016	0.0364058	0.456358	↑
ENSSSCG00000030070	protein_coding	1.60718	3.73236	0.027467	0.409946	↑
ENSSSCG00000030095	protein_coding	3.68972	4.51773	7.01416e-08	0.000119963	↑
ENSSSCG00000030108	protein_coding	3.80318	7.98663	0.00048732	0.0415925	↑
ENSSSCG00000030160	protein_coding	3.86829	0.740378	0.0461303	0.493137	↑
ENSSSCG00000030187	protein_coding	8.73499	0.105424	0.00288248	0.123899	↑
ENSSSCG00000030206	protein_coding	3.81962	1.89266	0.0296398	0.424103	↑
ENSSSCG00000030264	protein_coding	6.07109	0.0891831	0.00769097	0.212967	↑
ENSSSCG00000030337	protein_coding	3.43701	3.84473	0.000969463	0.0629177	↑
ENSSSCG00000030358	protein_coding	2.19871	3.61267	0.00385007	0.14729	↑
ENSSSCG00000030368	protein_coding	3.37287	8.55888	1.79677e-05	0.00549907	↑
ENSSSCG00000030375	protein_coding	5.41168	0.327318	0.0198501	0.35553	↑
ENSSSCG00000030391	protein_coding	11.3395	2.61449	0.000219595	0.0254371	↑
ENSSSCG00000030408	protein_coding	4.67163	8.67819	0.000480398	0.0415925	↑
ENSSSCG00000030451	protein_coding	1.83372	3.8119	0.0141601	0.298495	↑
ENSSSCG00000030505	protein_coding	4.17235	0.826508	0.0326332	0.439654	↑
ENSSSCG00000030513	protein_coding	4.08787	1.80586	0.0154914	0.314974	↑
ENSSSCG00000030520	protein_coding	1.82382	4.15087	0.0254306	0.394765	↑
ENSSSCG00000030543	protein_coding	1.54265	4.02783	0.02124	0.363606	↑
ENSSSCG00000030548	protein_coding	5.52453	6.80888	4.86941e-05	0.0101127	↑
ENSSSCG00000030560	protein_coding	5.88406	2.6182	2.94777e-05	0.00738847	↑
ENSSSCG00000030576	protein_coding	9.24188	0.572995	0.00072355	0.0533939	↑
ENSSSCG00000030581	protein_coding	5.11603	4.66721	2.68623e-11	2.6034e-07	↑
ENSSSCG00000030596	protein_coding	5.6378	-0.307932	0.0190678	0.349115	↑
ENSSSCG00000030622	protein_coding	4.55834	-0.539902	0.0460398	0.49286	↑
ENSSSCG00000030640	protein_coding	2.13744	2.37407	0.0424179	0.482234	↑
ENSSSCG00000030696	protein_coding	2.2165	2.78409	0.0207766	0.36043	↑
ENSSSCG00000030769	protein_coding	8.38513	-0.219658	0.00581029	0.182434	↑
ENSSSCG00000030798	protein_coding	1.583	5.37418	0.0242545	0.387899	↑
ENSSSCG00000030801	protein_coding	4.85422	4.64846	2.72561e-05	0.00720429	↑
ENSSSCG00000030827	protein_coding	7.64415	-0.866328	0.0176063	0.336999	↑
ENSSSCG00000030831	protein_coding	2.86788	3.72214	0.000509137	0.0420411	↑
ENSSSCG00000030839	protein_coding	2.71272	7.62274	0.000195055	0.0236301	↑
ENSSSCG00000030857	protein_coding	1.70452	5.55811	0.00894895	0.231899	↑
ENSSSCG00000030967	protein_coding	7.36784	-1.08135	0.0355619	0.451951	↑
ENSSSCG00000030984	protein_coding	2.96949	2.22094	0.0154218	0.314664	↑
ENSSSCG00000030985	protein_coding	7.09088	-1.36242	0.0468458	0.497206	↑
ENSSSCG00000031039	protein_coding	4.14333	3.15662	2.76174e-05	0.00723403	↑
ENSSSCG00000000170	protein_coding	-2.09707	3.89208	0.00530878	0.174017	↓
ENSSSCG00000000194	protein_coding	-2.39377	6.80858	0.00408729	0.151579	↓
ENSSSCG00000000216	protein_coding	-3.0164	2.02838	0.0190275	0.349085	↓
ENSSSCG00000000241	protein_coding	-7.17437	-1.31277	0.0463373	0.494588	↓
ENSSSCG00000000273	protein_coding	-1.90312	5.65354	0.00865288	0.227883	↓
ENSSSCG00000000419	protein_coding	-2.85264	2.845	0.00732604	0.208219	↓
ENSSSCG00000000420	protein_coding	-3.08062	1.74435	0.0169584	0.329602	↓
ENSSSCG00000000493	protein_coding	-1.71941	5.2063	0.0470955	0.498653	↓
ENSSSCG00000000519	protein_coding	-2.22758	5.06692	0.000988285	0.0631789	↓
ENSSSCG00000000591	protein_coding	-4.48996	-0.603242	0.0407246	0.473627	↓
ENSSSCG00000000683	protein_coding	-1.91307	4.21771	0.0444025	0.488276	↓
ENSSSCG00000000687	protein_coding	-2.19651	2.31478	0.0450649	0.490718	↓
ENSSSCG00000000801	protein_coding	-2.03199	2.53116	0.0453166	0.490718	↓
ENSSSCG00000000886	protein_coding	-1.50916	7.8878	0.0265497	0.403892	↓
ENSSSCG00000000918	protein_coding	-7.1217	4.28896	9.76867e-06	0.0035503	↓
ENSSSCG00000001087	protein_coding	-1.26688	4.39925	0.0455813	0.490843	↓
ENSSSCG00000001089	protein_coding	-2.75922	2.26375	0.0242789	0.387909	↓
ENSSSCG00000001137	protein_coding	-1.54676	8.59868	0.0450285	0.490718	↓
ENSSSCG00000001207	protein_coding	-1.36559	5.67256	0.0412371	0.475592	↓
ENSSSCG00000001255	protein_coding	-5.11459	-0.697408	0.0422773	0.48129	↓
ENSSSCG00000001433	protein_coding	-1.48714	5.97849	0.0265979	0.403957	↓
ENSSSCG00000001436	protein_coding	-1.30085	5.83631	0.0405739	0.473093	↓
ENSSSCG00000001476	protein_coding	-1.36406	4.40064	0.0478145	0.501958	↓
ENSSSCG00000001583	protein_coding	-1.56004	3.98461	0.0241762	0.387311	↓
ENSSSCG00000001711	protein_coding	-2.96136	6.24779	0.00503626	0.168679	↓
ENSSSCG00000001715	protein_coding	-1.48677	4.82316	0.0332387	0.442093	↓
ENSSSCG00000001770	protein_coding	-1.90211	8.1079	0.0292954	0.421248	↓
ENSSSCG00000001773	protein_coding	-2.11887	6.09815	0.017769	0.338187	↓
ENSSSCG00000001868	protein_coding	-1.46066	7.45523	0.0307572	0.429522	↓
ENSSSCG00000002013	protein_coding	-3.45559	6.6168	0.00224611	0.107021	↓
ENSSSCG00000002069	protein_coding	-7.9487	-0.640814	0.0453835	0.490718	↓
ENSSSCG00000002187	protein_coding	-7.62226	-0.934601	0.0191484	0.34992	↓
ENSSSCG00000002296	protein_coding	-1.9925	8.6208	0.0271232	0.408352	↓
ENSSSCG00000002297	protein_coding	-2.91102	8.6618	0.00148321	0.0824556	↓
ENSSSCG00000002349	protein_coding	-1.4798	5.02885	0.0222089	0.370467	↓
ENSSSCG00000002354	protein_coding	-1.60507	5.50895	0.0251365	0.393773	↓
ENSSSCG00000002442	protein_coding	-5.54196	0.33751	0.0235685	0.383037	↓
ENSSSCG00000002443	protein_coding	-3.69009	6.25844	0.000562571	0.0453096	↓
ENSSSCG00000002623	protein_coding	-1.61296	9.90933	0.0329759	0.441018	↓
ENSSSCG00000002626	protein_coding	-4.35213	6.89944	5.11202e-09	1.8579e-05	↓
ENSSSCG00000002686	protein_coding	-6.37824	2.09522	0.00111617	0.0678923	↓
ENSSSCG00000002737	protein_coding	-9.62294	3.20904	0.000185325	0.0227355	↓
ENSSSCG00000002749	protein_coding	-1.67504	4.39074	0.0335165	0.442704	↓
ENSSSCG00000002777	protein_coding	-3.39663	2.64291	0.00633638	0.190465	↓
ENSSSCG00000002914	protein_coding	-7.06801	-1.40601	0.0352466	0.450772	↓
ENSSSCG00000002915	protein_coding	-3.77295	2.01946	0.00631575	0.190457	↓
ENSSSCG00000002987	protein_coding	-2.88047	2.33527	0.0388652	0.467545	↓
ENSSSCG00000003064	protein_coding	-1.37529	3.96693	0.0496498	0.508298	↓
ENSSSCG00000003109	protein_coding	-1.92987	3.02406	0.0349639	0.448297	↓
ENSSSCG00000003139	protein_coding	-1.72548	6.9361	0.0306007	0.429522	↓
ENSSSCG00000003307	protein_coding	-2.49212	3.44492	0.0285302	0.416839	↓
ENSSSCG00000003440	protein_coding	-7.97604	-0.616322	0.0439118	0.486012	↓
ENSSSCG00000003582	protein_coding	-2.40359	3.99039	0.00152468	0.0834485	↓
ENSSSCG00000003599	protein_coding	-8.95972	0.282744	0.0166186	0.326257	↓
ENSSSCG00000003613	protein_coding	-3.36841	3.71189	0.0156693	0.316747	↓
ENSSSCG00000003671	protein_coding	-2.55408	3.78163	0.00103954	0.0648597	↓
ENSSSCG00000003687	protein_coding	-1.39475	4.69677	0.0324411	0.439136	↓
ENSSSCG00000003690	protein_coding	-2.53894	3.9358	0.000997107	0.0634374	↓
ENSSSCG00000003707	protein_coding	-2.33334	6.77703	0.00900903	0.233248	↓
ENSSSCG00000003743	protein_coding	-1.88483	7.02312	0.0131925	0.288183	↓
ENSSSCG00000003753	protein_coding	-4.77322	8.10406	0.000593678	0.046879	↓
ENSSSCG00000003764	protein_coding	-4.63626	8.91253	0.000816058	0.0579212	↓
ENSSSCG00000003770	protein_coding	-1.32524	4.3899	0.0450348	0.490718	↓
ENSSSCG00000003776	protein_coding	-1.45315	6.0645	0.0315069	0.432718	↓
ENSSSCG00000003824	protein_coding	-3.22028	1.71468	0.0195688	0.353393	↓
ENSSSCG00000003837	protein_coding	-1.99551	4.01262	0.0034734	0.139681	↓
ENSSSCG00000003853	protein_coding	-4.75536	6.39431	8.83699e-05	0.0147648	↓
ENSSSCG00000004049	protein_coding	-2.05211	6.42891	0.0145049	0.303403	↓
ENSSSCG00000004101	protein_coding	-2.25634	5.19918	0.00704878	0.203721	↓
ENSSSCG00000004134	protein_coding	-1.62413	4.29513	0.0212473	0.363606	↓
ENSSSCG00000004136	protein_coding	-3.29953	5.20245	0.00706118	0.203877	↓
ENSSSCG00000004141	protein_coding	-8.13004	-0.477493	0.0384748	0.466432	↓
ENSSSCG00000004195	protein_coding	-2.16157	2.91867	0.027395	0.409946	↓
ENSSSCG00000004206	protein_coding	-1.75454	4.86655	0.00883643	0.230322	↓
ENSSSCG00000004283	protein_coding	-2.07503	3.61706	0.0498329	0.509277	↓
ENSSSCG00000004327	protein_coding	-10.4853	1.76558	0.00114885	0.0690142	↓
ENSSSCG00000004337	protein_coding	-1.52933	4.83732	0.0193732	0.351608	↓
ENSSSCG00000004345	protein_coding	-8.45554	-0.179514	0.0282755	0.414997	↓
ENSSSCG00000004349	protein_coding	-2.26241	2.34843	0.0343469	0.446044	↓
ENSSSCG00000004435	protein_coding	-2.56591	4.06211	0.000932861	0.0615033	↓
ENSSSCG00000004452	protein_coding	-4.00722	4.01586	0.0257876	0.398181	↓
ENSSSCG00000004465	protein_coding	-2.85219	5.53594	0.00286818	0.123737	↓
ENSSSCG00000004509	protein_coding	-3.34624	7.60981	0.00363543	0.143273	↓
ENSSSCG00000004518	protein_coding	-2.67601	3.05387	0.019373	0.351608	↓
ENSSSCG00000004530	protein_coding	-5.88689	0.97219	0.0206222	0.358821	↓
ENSSSCG00000004533	protein_coding	-2.28297	4.28852	0.00258338	0.116228	↓
ENSSSCG00000004546	protein_coding	-1.87886	4.46342	0.00315265	0.13133	↓
ENSSSCG00000004565	protein_coding	-4.54187	4.24813	0.000828322	0.0583974	↓
ENSSSCG00000004676	protein_coding	-4.71429	2.47736	0.00400606	0.149712	↓
ENSSSCG00000004677	protein_coding	-3.76803	2.62653	0.0216611	0.367996	↓
ENSSSCG00000004678	protein_coding	-6.33939	3.91511	0.00165367	0.0877382	↓
ENSSSCG00000004679	protein_coding	-4.24719	5.82611	4.33131e-05	0.00936533	↓
ENSSSCG00000004732	protein_coding	-3.10535	1.0039	0.0386561	0.466553	↓
ENSSSCG00000004774	protein_coding	-1.79788	7.72219	0.02444	0.388515	↓
ENSSSCG00000004791	protein_coding	-2.40786	4.57745	0.0449662	0.490718	↓
ENSSSCG00000004807	protein_coding	-1.74354	4.15163	0.0220901	0.369333	↓
ENSSSCG00000004888	protein_coding	-1.52552	3.91428	0.0334666	0.442704	↓
ENSSSCG00000004904	protein_coding	-8.10549	-0.499725	0.0394397	0.470348	↓
ENSSSCG00000004907	protein_coding	-1.54307	5.03959	0.0478392	0.501958	↓
ENSSSCG00000004984	protein_coding	-7.28767	2.76672	1.62674e-08	4.29978e-05	↓
ENSSSCG00000005050	protein_coding	-2.52433	2.30969	0.0253916	0.394765	↓
ENSSSCG00000005177	protein_coding	-2.88433	3.8702	0.000132444	0.0187845	↓
ENSSSCG00000005199	protein_coding	-4.38412	3.1514	0.000244005	0.0272863	↓
ENSSSCG00000005203	protein_coding	-1.30635	5.03921	0.0439393	0.486012	↓
ENSSSCG00000005212	protein_coding	-1.99171	3.70594	0.0235076	0.382793	↓
ENSSSCG00000005216	protein_coding	-10.6318	10.3486	1.42111e-06	0.00100777	↓
ENSSSCG00000005222	protein_coding	-3.46996	1.37381	0.0256336	0.396856	↓
ENSSSCG00000005236	protein_coding	-2.44896	6.31881	0.00285389	0.12353	↓
ENSSSCG00000005271	protein_coding	-1.32458	4.6153	0.0420012	0.480073	↓
ENSSSCG00000005380	protein_coding	-2.44861	6.46872	0.00893909	0.23185	↓
ENSSSCG00000005381	protein_coding	-2.73752	4.7524	0.00370218	0.144594	↓
ENSSSCG00000005422	protein_coding	-1.51853	3.59989	0.0407812	0.473717	↓
ENSSSCG00000005424	protein_coding	-1.75943	3.83268	0.013124	0.287464	↓
ENSSSCG00000005444	protein_coding	-1.40765	5.73691	0.0308857	0.429694	↓
ENSSSCG00000005453	protein_coding	-2.13952	7.35332	0.00294783	0.12515	↓
ENSSSCG00000005504	protein_coding	-4.47828	-0.161871	0.0319996	0.436766	↓
ENSSSCG00000005701	protein_coding	-2.2472	4.7577	0.00337115	0.136894	↓
ENSSSCG00000005768	protein_coding	-1.30226	4.67129	0.0412077	0.475592	↓
ENSSSCG00000005802	protein_coding	-6.9549	-1.49797	0.0398683	0.470825	↓
ENSSSCG00000005955	protein_coding	-1.36783	4.45577	0.0357578	0.452571	↓
ENSSSCG00000005956	protein_coding	-8.85955	0.197509	0.0172502	0.332241	↓
ENSSSCG00000005970	protein_coding	-2.06387	6.09073	0.0266562	0.404082	↓
ENSSSCG00000006003	protein_coding	-2.16798	3.69469	0.0185869	0.345092	↓
ENSSSCG00000006059	protein_coding	-1.24965	4.83783	0.0482547	0.50305	↓
ENSSSCG00000006064	protein_coding	-1.94698	5.21347	0.0346679	0.447524	↓
ENSSSCG00000006114	protein_coding	-10.44	1.72018	6.86649e-06	0.00269788	↓
ENSSSCG00000006116	protein_coding	-3.28959	2.48322	0.0116274	0.27067	↓
ENSSSCG00000006126	protein_coding	-1.99184	6.58407	0.00577072	0.182232	↓
ENSSSCG00000006158	protein_coding	-1.71294	3.30771	0.0298359	0.425234	↓
ENSSSCG00000006177	protein_coding	-1.48339	3.68905	0.0383836	0.465972	↓
ENSSSCG00000006183	protein_coding	-1.93431	4.75546	0.0247757	0.39171	↓
ENSSSCG00000006185	protein_coding	-1.51896	4.34956	0.0339034	0.443612	↓
ENSSSCG00000006192	protein_coding	-1.51307	5.05199	0.0253781	0.394765	↓
ENSSSCG00000006219	protein_coding	-1.9016	4.57794	0.00668371	0.197891	↓
ENSSSCG00000006288	protein_coding	-2.41141	4.34049	0.000503522	0.0418796	↓
ENSSSCG00000006296	protein_coding	-2.02142	5.07021	0.0116725	0.271503	↓
ENSSSCG00000006301	protein_coding	-1.22782	4.5762	0.047421	0.499915	↓
ENSSSCG00000006308	protein_coding	-2.06302	7.58999	0.00634773	0.190465	↓
ENSSSCG00000006337	protein_coding	-2.31356	4.51365	0.00314728	0.13133	↓
ENSSSCG00000006365	protein_coding	-1.65236	6.43306	0.0223581	0.371889	↓
ENSSSCG00000006369	protein_coding	-2.25798	6.31499	0.00847123	0.225821	↓
ENSSSCG00000006375	protein_coding	-2.53684	3.00037	0.00412869	0.152619	↓
ENSSSCG00000006512	protein_coding	-3.00861	7.64874	0.00234717	0.109483	↓
ENSSSCG00000006719	protein_coding	-4.12065	11.4534	0.00133992	0.0769925	↓
ENSSSCG00000006735	protein_coding	-1.58592	7.12051	0.0261128	0.401284	↓
ENSSSCG00000006789	protein_coding	-1.36125	6.95773	0.0375115	0.462334	↓
ENSSSCG00000006831	protein_coding	-1.62417	4.95829	0.00907936	0.234063	↓
ENSSSCG00000006836	protein_coding	-4.25312	3.65511	0.0299233	0.425855	↓
ENSSSCG00000006861	protein_coding	-1.77204	4.39194	0.011486	0.269102	↓
ENSSSCG00000006867	protein_coding	-2.33554	3.88282	0.00738483	0.20846	↓
ENSSSCG00000006982	protein_coding	-2.39304	4.97353	0.000162471	0.0211709	↓
ENSSSCG00000006995	protein_coding	-1.64107	7.00986	0.0216684	0.367996	↓
ENSSSCG00000007008	protein_coding	-7.74609	-0.821456	0.0334917	0.442704	↓
ENSSSCG00000007045	protein_coding	-3.29261	3.47653	0.0209104	0.362318	↓
ENSSSCG00000007048	protein_coding	-1.44357	3.59805	0.0471518	0.498732	↓
ENSSSCG00000007061	protein_coding	-3.80948	2.03729	0.00751104	0.210835	↓
ENSSSCG00000007072	protein_coding	-3.27627	3.83931	0.00198073	0.0977752	↓
ENSSSCG00000007088	protein_coding	-1.47468	6.70731	0.031489	0.432718	↓
ENSSSCG00000007095	protein_coding	-1.45703	3.57657	0.0466234	0.496184	↓
ENSSSCG00000007286	protein_coding	-3.27939	6.91266	0.00101774	0.064188	↓
ENSSSCG00000007322	protein_coding	-1.37223	4.65585	0.0279012	0.412633	↓
ENSSSCG00000007375	protein_coding	-1.54508	7.67417	0.0405912	0.473093	↓
ENSSSCG00000007435	protein_coding	-2.59897	7.72567	0.0120904	0.275721	↓
ENSSSCG00000007461	protein_coding	-8.93115	0.265034	0.0157933	0.317559	↓
ENSSSCG00000007739	protein_coding	-1.86548	6.89728	0.0480044	0.502278	↓
ENSSSCG00000007860	protein_coding	-8.16734	-0.448728	0.0090208	0.233345	↓
ENSSSCG00000008012	protein_coding	-2.5073	5.31907	0.0118493	0.273756	↓
ENSSSCG00000008140	protein_coding	-3.93062	-0.0346801	0.0455468	0.490718	↓
ENSSSCG00000008163	protein_coding	-4.82006	2.22278	0.0281916	0.414813	↓
ENSSSCG00000008267	protein_coding	-6.14535	2.07443	0.00946051	0.239394	↓
ENSSSCG00000008272	protein_coding	-8.95883	0.291184	0.0152314	0.312307	↓
ENSSSCG00000008326	protein_coding	-3.14869	4.16092	0.00192238	0.0962018	↓
ENSSSCG00000008368	protein_coding	-3.43241	7.76362	0.000895752	0.0604269	↓
ENSSSCG00000008430	protein_coding	-9.91522	1.20902	0.0033398	0.136074	↓
ENSSSCG00000008529	protein_coding	-1.50991	5.8086	0.0324891	0.439154	↓
ENSSSCG00000008542	protein_coding	-1.59915	3.98601	0.0189556	0.349085	↓
ENSSSCG00000008569	protein_coding	-1.82244	7.32353	0.0248992	0.392595	↓
ENSSSCG00000008631	protein_coding	-1.56368	4.08359	0.0208629	0.361711	↓
ENSSSCG00000008787	protein_coding	-1.56017	4.11241	0.0399684	0.471348	↓
ENSSSCG00000008857	protein_coding	-4.23482	7.80098	0.000268878	0.0288474	↓
ENSSSCG00000008877	protein_coding	-1.81269	6.27439	0.0170975	0.330306	↓
ENSSSCG00000008948	protein_coding	-3.24603	3.75801	0.000379146	0.0361431	↓
ENSSSCG00000008963	protein_coding	-5.92606	6.18832	0.0120006	0.275123	↓
ENSSSCG00000008999	protein_coding	-5.08278	-0.726035	0.0330573	0.44143	↓
ENSSSCG00000009063	protein_coding	-2.04928	3.25042	0.0128399	0.285108	↓
ENSSSCG00000009075	protein_coding	-1.41256	5.05351	0.0457821	0.491912	↓
ENSSSCG00000009100	protein_coding	-3.71021	2.54614	0.00236252	0.10985	↓
ENSSSCG00000009139	protein_coding	-1.33523	4.62814	0.0464049	0.494842	↓
ENSSSCG00000009140	protein_coding	-1.69866	3.91117	0.0131613	0.287719	↓
ENSSSCG00000009192	protein_coding	-2.43984	8.43632	0.017314	0.332939	↓
ENSSSCG00000009202	protein_coding	-1.36847	7.27328	0.0412844	0.475744	↓
ENSSSCG00000009219	protein_coding	-7.41239	5.42246	0.000261404	0.0285797	↓
ENSSSCG00000009241	protein_coding	-1.30987	5.56405	0.0407194	0.473627	↓
ENSSSCG00000009331	protein_coding	-4.38508	5.53267	0.00139943	0.0788537	↓
ENSSSCG00000009405	protein_coding	-1.35355	4.92989	0.0424828	0.48231	↓
ENSSSCG00000009407	protein_coding	-1.33705	6.08652	0.0360519	0.453962	↓
ENSSSCG00000009434	protein_coding	-4.11662	5.76239	0.00355331	0.14141	↓
ENSSSCG00000009466	protein_coding	-1.61824	3.57274	0.0380854	0.464485	↓
ENSSSCG00000009485	protein_coding	-7.59705	0.899239	0.0028684	0.123737	↓
ENSSSCG00000009495	protein_coding	-1.95822	3.31894	0.0256002	0.396762	↓
ENSSSCG00000009642	protein_coding	-1.81517	5.88462	0.0135059	0.291949	↓
ENSSSCG00000009645	protein_coding	-3.36084	8.09043	0.00486416	0.165091	↓
ENSSSCG00000009759	protein_coding	-3.64932	9.23514	0.002575	0.116122	↓
ENSSSCG00000009788	protein_coding	-1.31563	4.82262	0.0405685	0.473093	↓
ENSSSCG00000009821	protein_coding	-1.31188	6.37486	0.0474107	0.499915	↓
ENSSSCG00000009909	protein_coding	-1.38107	8.22552	0.0423062	0.48143	↓
ENSSSCG00000009931	protein_coding	-2.62526	5.64043	0.00508815	0.16955	↓
ENSSSCG00000009932	protein_coding	-1.5939	4.4759	0.0442062	0.487223	↓
ENSSSCG00000009942	protein_coding	-3.61769	1.96983	0.0069317	0.200936	↓
ENSSSCG00000009963	protein_coding	-1.70143	4.89946	0.0440932	0.486584	↓
ENSSSCG00000010001	protein_coding	-1.45052	3.85672	0.0406453	0.473093	↓
ENSSSCG00000010023	protein_coding	-6.33326	5.96723	3.35089e-06	0.00158464	↓
ENSSSCG00000010026	protein_coding	-1.74916	7.09307	0.0485896	0.503978	↓
ENSSSCG00000010101	protein_coding	-2.36371	2.92644	0.0268533	0.406434	↓
ENSSSCG00000010214	protein_coding	-2.16066	3.58436	0.0182637	0.341437	↓
ENSSSCG00000010274	protein_coding	-1.40554	6.60848	0.0454921	0.490718	↓
ENSSSCG00000010295	protein_coding	-1.48222	4.83297	0.0193251	0.351608	↓
ENSSSCG00000010300	protein_coding	-1.31393	4.08877	0.0467525	0.497206	↓
ENSSSCG00000010340	protein_coding	-3.512	7.15828	0.000568688	0.0456757	↓
ENSSSCG00000010345	protein_coding	-1.7169	7.40531	0.0234918	0.382793	↓
ENSSSCG00000010355	protein_coding	-4.24522	-0.082803	0.0496424	0.508298	↓
ENSSSCG00000010399	protein_coding	-1.49721	8.14649	0.0349573	0.448297	↓
ENSSSCG00000010400	protein_coding	-5.37435	10.4265	0.00111464	0.0678923	↓
ENSSSCG00000010426	protein_coding	-2.44799	5.91473	0.00682526	0.199442	↓
ENSSSCG00000010437	protein_coding	-2.76237	8.8842	0.00351845	0.141102	↓
ENSSSCG00000010450	protein_coding	-2.74833	8.66166	0.0026585	0.118009	↓
ENSSSCG00000010456	protein_coding	-1.59323	3.42133	0.0433092	0.484759	↓
ENSSSCG00000010537	protein_coding	-4.07194	10.0793	4.18368e-05	0.00935696	↓
ENSSSCG00000010541	protein_coding	-1.46277	4.39597	0.0404281	0.473093	↓
ENSSSCG00000010554	protein_coding	-3.33608	8.10972	0.000924398	0.0613627	↓
ENSSSCG00000010682	protein_coding	-3.82023	8.09945	0.000145657	0.0196976	↓
ENSSSCG00000010723	protein_coding	-1.55976	5.6752	0.0246896	0.390774	↓
ENSSSCG00000010738	protein_coding	-1.30423	6.34401	0.0469087	0.497298	↓
ENSSSCG00000010853	protein_coding	-3.2461	7.81295	0.000917426	0.0611793	↓
ENSSSCG00000010965	protein_coding	-2.33257	7.7426	0.00364156	0.143273	↓
ENSSSCG00000011077	protein_coding	-1.73275	5.15855	0.0106349	0.25756	↓
ENSSSCG00000011147	protein_coding	-4.65274	3.28973	1.23308e-05	0.00404913	↓
ENSSSCG00000011148	protein_coding	-4.652	0.467461	0.0134586	0.291152	↓
ENSSSCG00000011178	protein_coding	-4.06264	1.76691	0.0328683	0.440593	↓
ENSSSCG00000011179	protein_coding	-1.57453	3.85801	0.0280358	0.413988	↓
ENSSSCG00000011290	protein_coding	-1.4419	5.04007	0.0330446	0.44143	↓
ENSSSCG00000011294	protein_coding	-1.75007	4.90257	0.0236168	0.383608	↓
ENSSSCG00000011361	protein_coding	-1.85165	5.33326	0.0470474	0.498326	↓
ENSSSCG00000011470	protein_coding	-1.78367	4.27894	0.0197083	0.354371	↓
ENSSSCG00000011642	protein_coding	-1.39343	7.1594	0.0459519	0.492644	↓
ENSSSCG00000011653	protein_coding	-1.73066	5.87089	0.0125483	0.281081	↓
ENSSSCG00000011673	protein_coding	-1.46005	5.54809	0.0229191	0.377977	↓
ENSSSCG00000011676	protein_coding	-1.30842	4.59175	0.0387836	0.467509	↓
ENSSSCG00000011680	protein_coding	-1.99987	3.68686	0.0106209	0.25755	↓
ENSSSCG00000011683	protein_coding	-5.48991	7.61629	0.000171617	0.0217581	↓
ENSSSCG00000011685	protein_coding	-4.68024	2.67296	0.0194712	0.352725	↓
ENSSSCG00000011702	protein_coding	-1.90999	6.14442	0.0400912	0.472117	↓
ENSSSCG00000011723	protein_coding	-4.02208	6.14753	1.15561e-05	0.00399992	↓
ENSSSCG00000011747	protein_coding	-2.59687	8.68542	0.0268507	0.406434	↓
ENSSSCG00000011755	protein_coding	-1.45942	4.61506	0.0452129	0.490718	↓
ENSSSCG00000011756	protein_coding	-3.01311	2.34385	0.0251239	0.393773	↓
ENSSSCG00000011766	protein_coding	-3.47182	2.70492	0.0011395	0.0687367	↓
ENSSSCG00000011802	protein_coding	-2.61092	3.68325	0.00722039	0.207452	↓
ENSSSCG00000011871	protein_coding	-1.91508	4.10739	0.00442763	0.157038	↓
ENSSSCG00000011906	protein_coding	-1.55844	4.62457	0.0344947	0.446982	↓
ENSSSCG00000011936	protein_coding	-3.56056	3.01653	0.0494869	0.507927	↓
ENSSSCG00000011970	protein_coding	-1.88663	3.80867	0.00726546	0.207588	↓
ENSSSCG00000011977	protein_coding	-1.72239	6.45771	0.0396152	0.470825	↓
ENSSSCG00000011978	protein_coding	-1.37363	4.72081	0.0447931	0.490347	↓
ENSSSCG00000011993	protein_coding	-1.52389	4.78407	0.0323433	0.438611	↓
ENSSSCG00000012007	protein_coding	-1.35997	5.69551	0.0408183	0.473769	↓
ENSSSCG00000012019	protein_coding	-2.86435	2.28201	0.0195033	0.353026	↓
ENSSSCG00000012020	protein_coding	-1.6375	4.70029	0.0241643	0.387311	↓
ENSSSCG00000012042	protein_coding	-1.33504	6.74096	0.0464944	0.495174	↓
ENSSSCG00000012142	protein_coding	-1.74011	5.1105	0.00854426	0.226046	↓
ENSSSCG00000012163	protein_coding	-1.7732	5.51566	0.0160139	0.319345	↓
ENSSSCG00000012165	protein_coding	-1.2608	4.42732	0.0454282	0.490718	↓
ENSSSCG00000012310	protein_coding	-2.41299	4.10655	0.0101703	0.252305	↓
ENSSSCG00000012409	protein_coding	-2.20273	5.45316	0.0407503	0.473639	↓
ENSSSCG00000012481	protein_coding	-1.63812	4.12546	0.0149275	0.30869	↓
ENSSSCG00000012495	protein_coding	-3.66092	1.31947	0.0418367	0.47871	↓
ENSSSCG00000012504	protein_coding	-1.50062	5.82031	0.0210644	0.363254	↓
ENSSSCG00000012551	protein_coding	-3.43813	6.03606	0.000788394	0.0565989	↓
ENSSSCG00000012567	protein_coding	-7.85878	-0.726353	0.0140854	0.298187	↓
ENSSSCG00000012572	protein_coding	-1.53984	4.19904	0.0447449	0.490187	↓
ENSSSCG00000012581	protein_coding	-1.57518	4.74365	0.0237575	0.384317	↓
ENSSSCG00000012582	protein_coding	-8.08051	-0.522304	0.0402418	0.472582	↓
ENSSSCG00000012583	protein_coding	-3.3537	8.67375	0.00217647	0.104943	↓
ENSSSCG00000012627	protein_coding	-2.26212	3.47324	0.01735	0.333199	↓
ENSSSCG00000012758	protein_coding	-1.72592	6.08019	0.028515	0.416829	↓
ENSSSCG00000012811	protein_coding	-1.27536	4.36349	0.0460382	0.49286	↓
ENSSSCG00000012833	protein_coding	-2.09963	5.48879	0.0236568	0.383829	↓
ENSSSCG00000012926	protein_coding	-1.48865	4.81697	0.0446673	0.489706	↓
ENSSSCG00000013004	protein_coding	-4.51268	7.51422	0.00155263	0.0843788	↓
ENSSSCG00000013052	protein_coding	-1.61531	6.41584	0.0198065	0.355039	↓
ENSSSCG00000013072	protein_coding	-1.90463	7.25136	0.0202911	0.356696	↓
ENSSSCG00000013229	protein_coding	-1.28422	5.10152	0.0431272	0.48414	↓
ENSSSCG00000013302	protein_coding	-2.17046	9.25853	0.0197682	0.354572	↓
ENSSSCG00000013322	protein_coding	-2.02434	3.25089	0.0187334	0.346045	↓
ENSSSCG00000013328	protein_coding	-1.61258	3.25338	0.0476513	0.500903	↓
ENSSSCG00000013335	protein_coding	-1.37852	6.12214	0.0373467	0.461139	↓
ENSSSCG00000013344	protein_coding	-3.09767	2.84813	0.00136284	0.0778202	↓
ENSSSCG00000013346	protein_coding	-5.80558	-0.449727	0.0218475	0.368274	↓
ENSSSCG00000013349	protein_coding	-1.67758	5.15509	0.0327227	0.439765	↓
ENSSSCG00000013514	protein_coding	-2.46066	3.71936	0.00257605	0.116122	↓
ENSSSCG00000013570	protein_coding	-1.48071	4.42169	0.0356275	0.451965	↓
ENSSSCG00000013780	protein_coding	-1.84442	6.34571	0.0108709	0.261432	↓
ENSSSCG00000013830	protein_coding	-1.68626	6.71466	0.0148949	0.308546	↓
ENSSSCG00000013833	protein_coding	-3.27127	2.53868	0.00162929	0.0870802	↓
ENSSSCG00000014012	protein_coding	-1.74966	4.83591	0.0372693	0.460521	↓
ENSSSCG00000014063	protein_coding	-2.68888	5.72477	0.00264037	0.117584	↓
ENSSSCG00000014080	protein_coding	-2.20411	6.98421	0.00916081	0.235576	↓
ENSSSCG00000014083	protein_coding	-2.20686	3.9643	0.00249689	0.113789	↓
ENSSSCG00000014156	protein_coding	-1.54474	8.91498	0.0383823	0.465972	↓
ENSSSCG00000014168	protein_coding	-1.85308	5.82693	0.00470177	0.162164	↓
ENSSSCG00000014169	protein_coding	-8.12428	6.18879	7.68087e-07	0.000746857	↓
ENSSSCG00000014180	protein_coding	-1.69938	4.50076	0.014636	0.305486	↓
ENSSSCG00000014202	protein_coding	-4.25576	2.71431	0.000913957	0.061152	↓
ENSSSCG00000014213	protein_coding	-1.64227	3.57574	0.0287547	0.41827	↓
ENSSSCG00000014288	protein_coding	-1.5441	4.12653	0.032362	0.43866	↓
ENSSSCG00000014579	protein_coding	-1.42452	3.93102	0.0369262	0.458229	↓
ENSSSCG00000014816	protein_coding	-1.56315	4.32199	0.0481488	0.502806	↓
ENSSSCG00000014861	protein_coding	-2.92593	2.81414	0.0107374	0.259293	↓
ENSSSCG00000014933	protein_coding	-2.1984	2.35904	0.0338207	0.443329	↓
ENSSSCG00000015144	protein_coding	-1.82178	6.54452	0.0440828	0.486584	↓
ENSSSCG00000015211	protein_coding	-6.2282	0.76823	0.0259463	0.399359	↓
ENSSSCG00000015268	protein_coding	-3.17503	5.57783	3.27044e-05	0.00802975	↓
ENSSSCG00000015311	protein_coding	-2.41901	7.12433	0.0163374	0.323467	↓
ENSSSCG00000015332	protein_coding	-4.43101	0.934869	0.0380283	0.464485	↓
ENSSSCG00000015340	protein_coding	-1.49119	3.66503	0.0421024	0.480427	↓
ENSSSCG00000015362	protein_coding	-2.57407	5.03266	0.0203464	0.35723	↓
ENSSSCG00000015389	protein_coding	-3.59927	5.85153	0.00751247	0.210835	↓
ENSSSCG00000015390	protein_coding	-3.87094	9.01477	0.00159237	0.0857374	↓
ENSSSCG00000015398	protein_coding	-1.59894	3.87167	0.0214184	0.365888	↓
ENSSSCG00000015399	protein_coding	-3.45021	4.05187	0.000289468	0.0304474	↓
ENSSSCG00000015402	protein_coding	-1.87354	5.21232	0.0299398	0.42588	↓
ENSSSCG00000015405	protein_coding	-1.50044	4.98937	0.0170843	0.33027	↓
ENSSSCG00000015422	protein_coding	-1.9533	5.04537	0.00415207	0.153006	↓
ENSSSCG00000015600	protein_coding	-2.15525	2.86619	0.036701	0.457192	↓
ENSSSCG00000015662	protein_coding	-4.47111	2.82771	0.00735763	0.208299	↓
ENSSSCG00000015664	protein_coding	-1.68713	3.32369	0.0306275	0.429522	↓
ENSSSCG00000015709	protein_coding	-3.13105	7.26421	0.00334159	0.136074	↓
ENSSSCG00000015735	protein_coding	-2.26231	4.33091	0.0102063	0.25285	↓
[truncated: 245 more rows]

## Sheet: DE miRNA
Different Expressed miRNA of two stages
lncRNA ID	logFC	logCPM	p-value	FDR	up-expression ↑down-expression ↓
novel:3_18386	7.5275	0.294823	0.000100696	0.0540735	↑
ssc-miR-7138-5p	6.75973	-0.341664	0.00062196	0.131954	↑
ssc-miR-124a	5.86536	4.38182	0.000795184	0.131954	↑
novel:GL893595.2_33582	4.77393	7.71173	0.00110576	0.131954	↑
ssc-miR-153	5.76612	2.60564	0.00138821	0.135782	↑
novel:8_28121	8.41746	1.10696	0.00139069	0.135782	↑
novel:GL893173.1_33471	7.08861	-0.0880207	0.0017051	0.151808	↑
novel:4_19717	6.39412	1.94097	0.00183752	0.151808	↑
ssc-miR-92b-3p	2.82702	7.04494	0.0019857	0.152332	↑
ssc-miR-885-5p	4.39537	1.77925	0.00522873	0.257197	↑
novel:15_12033	4.41708	-0.462745	0.00524841	0.257197	↑
ssc-miR-664-3p	2.89461	1.51728	0.0052952	0.257197	↑
novel:2_16146	4.18876	-0.561046	0.00773687	0.265016	↑
novel:13_7723	5.76676	0.629509	0.00808383	0.265016	↑
ssc-miR-574	2.11862	9.7688	0.00863646	0.265016	↑
ssc-miR-216	4.75007	1.86752	0.009186	0.268744	↑
novel:17_13714	5.69922	-1.09601	0.00950863	0.268744	↑
ssc-miR-504	2.10173	8.94311	0.0106579	0.270954	↑
novel:7_26126	3.23329	0.594537	0.0108482	0.270954	↑
novel:1_1924	2.45054	4.0138	0.0151993	0.32648	↑
novel:2_14570	2.91787	5.38902	0.0203435	0.397252	↑
novel:GL895364.2_34610	6.05294	-0.847495	0.0245767	0.410765	↑
ssc-miR-9785-5p	2.59558	0.0565417	0.0287063	0.467129	↑
ssc-miR-92a	1.59881	13.059	0.0304833	0.469054	↑
novel:1_1991	2.75627	3.89905	0.0310622	0.469054	↑
ssc-miR-92b-5p	2.30223	2.25254	0.0314169	0.469054	↑
ssc-miR-133a-3p	1.81024	8.14744	0.031445	0.469054	↑
ssc-miR-1	2.01334	6.6471	0.0355449	0.487477	↑
novel:6_23476	2.53703	5.4295	0.0358573	0.487477	↑
novel:1_954	2.53849	0.47666	0.0375224	0.503738	↑
novel:13_7211	2.34441	6.39208	0.0398074	0.527816	↑
novel:2_16138	4.84844	-1.56632	0.0444735	0.536681	↑
ssc-miR-299	1.81466	5.93575	0.0450087	0.537103	↑
ssc-miR-9	1.89386	7.66367	0.0466173	0.542439	↑
ssc-miR-9-1	1.89386	7.66367	0.0467267	0.542439	↑
ssc-miR-9-2	1.89386	7.66367	0.046971	0.542439	↑
ssc-miR-195	1.44116	12.6324	0.0495071	0.559691	↑
novel:GL892983.1_34817	-6.4755	2.54408	5.63068e-05	0.0540735	↓
ssc-miR-7857-3p	-5.62158	4.75437	0.000444256	0.131954	↓
ssc-miR-452	-3.20691	6.99709	0.000537345	0.131954	↓
novel:3_17830	-3.73229	3.48975	0.00108214	0.131954	↓
ssc-miR-202-3p	-2.86194	8.86098	0.00108305	0.131954	↓
novel:3_18917	-2.8791	4.55215	0.00239937	0.171795	↓
novel:17_12998	-2.51355	6.14146	0.00405522	0.257197	↓
novel:1_2582	-6.93706	-0.109342	0.00455182	0.257197	↓
novel:GL896501.1_34780	-3.77811	0.623889	0.00563582	0.257197	↓
novel:8_28487	-3.98604	-0.433031	0.00568606	0.257197	↓
ssc-miR-503	-2.57433	6.04051	0.00573486	0.257197	↓
novel:GL894520.2_33580	-3.98607	-0.433031	0.00574743	0.257197	↓
ssc-miR-2366	-2.63358	7.65507	0.00639695	0.265016	↓
ssc-miR-218-5p	-2.51635	9.8993	0.00703024	0.265016	↓
ssc-miR-218	-2.51635	9.8993	0.00732071	0.265016	↓
ssc-miR-542-5p	-2.32704	7.84345	0.00785722	0.265016	↓
ssc-miR-218b	-2.51635	9.8993	0.00805743	0.265016	↓
ssc-miR-450c-5p	-2.29305	7.00783	0.00805982	0.265016	↓
ssc-miR-542-3p	-2.27003	7.05471	0.0083372	0.265016	↓
novel:6_24975	-2.57806	2.51134	0.00859121	0.265016	↓
novel:3_18805	-2.1508	6.11797	0.00935042	0.268744	↓
novel:14_9508	-2.12923	5.73108	0.00983644	0.27088	↓
novel:16_12483	-3.29264	1.00648	0.010354	0.270954	↓
ssc-miR-196b-5p	-3.78253	5.98583	0.0107192	0.270954	↓
novel:7_26573	-2.62188	1.78568	0.0122716	0.299538	↓
novel:13_7438	-5.79205	-0.94472	0.0127355	0.303954	↓
novel:6_23211	-3.71336	0.0943734	0.0136272	0.311833	↓
novel:X_32106	-2.4685	2.04282	0.0136463	0.311833	↓
ssc-miR-6782-3p	-3.2478	2.55984	0.014072	0.314861	↓
ssc-miR-1839-5p	-2.69087	1.86665	0.0145668	0.31928	↓
novel:5_21377	-2.31818	5.30813	0.0155203	0.326838	↓
novel:16_12373	-3.3031	-0.266207	0.0159423	0.329269	↓
novel:3_18589	-2.30013	3.73206	0.0172414	0.347457	↓
ssc-miR-34a	-2.17557	8.41005	0.0174699	0.347457	↓
novel:3_19218	-2.18297	6.03948	0.0213592	0.402586	↓
novel:X_32110	-2.51266	0.589873	0.0224364	0.402586	↓
ssc-miR-450a	-1.96507	6.17444	0.0226782	0.402586	↓
ssc-miR-424-5p	-1.71743	11.9041	0.0232811	0.402586	↓
novel:5_22140	-3.39168	-0.159507	0.0232968	0.402586	↓
novel:JH118494.1_33284	-3.39164	-0.159507	0.0233881	0.402586	↓
novel:17_13221	-5.58984	-1.06603	0.0235389	0.402586	↓
novel:15_12025	-5.58978	-1.06603	0.0236154	0.402586	↓
ssc-miR-324	-1.83375	6.03613	0.0248601	0.410765	↓
novel:1_357	-4.99586	-1.41405	0.0309015	0.469054	↓
ssc-miR-425-5p	-1.7008	10.9563	0.031394	0.469054	↓
novel:X_32102	-2.07056	2.63345	0.0319179	0.469232	↓
novel:GL894441.2_33815	-2.10134	3.40852	0.0324662	0.469232	↓
novel:7_26428	-2.10135	3.40852	0.0327676	0.469232	↓
ssc-miR-219b-3p	-2.3899	1.07194	0.033522	0.473719	↓
ssc-miR-185	-1.71539	9.23214	0.0350249	0.487477	↓
novel:4_19999	-2.36186	1.42434	0.040811	0.528435	↓
ssc-miR-196a	-3.4734	3.35901	0.0408381	0.528435	↓
ssc-miR-224	-2.08552	5.41527	0.0419653	0.536556	↓
novel:15_12026	-5.29174	-1.24443	0.0427903	0.536681	↓
novel:2_16733	-4.84457	-1.48941	0.0432052	0.536681	↓
ssc-miR-1285	-1.58592	8.37648	0.0439301	0.536681	↓
novel:2_15873	-3.11366	-0.354273	0.0444545	0.536681	↓
novel:3_18864	-2.19029	0.754479	0.0482207	0.550947	↓

## Sheet: DE lncRNA
Different Expressed lncRNA of two stages
lncRNA ID	Type	logFC	logCPM	p-value	FDR	up-expression ↑down-expression ↓
MSTRG.101153	antisense	2.35013	2.52195	0.044098	0.486584	↑
MSTRG.109110	antisense	5.21974	-0.648818	0.0354967	0.451869	↑
MSTRG.110012	antisense	6.0371	-0.00833063	0.00917319	0.23561	↑
MSTRG.110529	antisense	7.53428	-0.958212	0.020075	0.355914	↑
MSTRG.110743	antisense	4.47596	1.96252	0.00511717	0.170228	↑
MSTRG.110773	antisense	2.54833	5.06376	0.000108492	0.0165441	↑
MSTRG.11161	antisense	8.39561	-0.216103	0.00611407	0.187244	↑
MSTRG.114143	antisense	2.47321	2.74101	0.0099571	0.248927	↑
MSTRG.116945	antisense	7.83691	-0.694896	0.0151835	0.311657	↑
MSTRG.122559	antisense	3.41828	1.80376	0.00880441	0.229792	↑
MSTRG.131811	antisense	7.23833	-1.20061	0.0293629	0.42201	↑
MSTRG.131826	antisense	1.50529	5.01184	0.0333634	0.442704	↑
MSTRG.133082	antisense	7.51736	-0.984889	0.0201573	0.355914	↑
MSTRG.13590	antisense	6.71833	-1.62005	0.0456093	0.490963	↑
MSTRG.139700	antisense	7.4533	-1.06024	0.0308149	0.429694	↑
MSTRG.147628	antisense	8.16299	-0.41465	0.00848304	0.225821	↑
MSTRG.148569	antisense	7.76126	-0.792192	0.0200675	0.355914	↑
MSTRG.15305	antisense	7.09695	-1.30721	0.0397694	0.470825	↑
MSTRG.15650	antisense	7.32731	-1.14727	0.0254212	0.394765	↑
MSTRG.157431	antisense	7.12858	-1.27664	0.0441322	0.486776	↑
MSTRG.159304	antisense	7.54871	-0.980245	0.0302532	0.426864	↑
MSTRG.160972	antisense	2.37316	2.53186	0.0379281	0.464485	↑
MSTRG.162782	antisense	1.97923	3.3619	0.0413283	0.475744	↑
MSTRG.167556	antisense	1.49359	5.23329	0.0240358	0.386527	↑
MSTRG.168103	antisense	1.85983	2.80498	0.0396927	0.470825	↑
MSTRG.169559	antisense	7.10584	-1.31432	0.0319103	0.436609	↑
MSTRG.179061	antisense	6.2755	1.11765	0.00806298	0.219962	↑
MSTRG.179479	antisense	7.32956	-1.12661	0.0265482	0.403892	↑
MSTRG.180534	antisense	6.78232	-1.5729	0.0427858	0.482867	↑
MSTRG.193237	antisense	1.81838	3.86583	0.0205735	0.35869	↑
MSTRG.205928	antisense	4.51426	0.39941	0.031963	0.436766	↑
MSTRG.210531	antisense	7.53933	-0.964275	0.0191708	0.34992	↑
MSTRG.21058	antisense	5.82873	-0.128765	0.0123731	0.278688	↑
MSTRG.217503	antisense	4.70681	0.561519	0.0222883	0.370939	↑
MSTRG.22387	antisense	4.22081	0.906145	0.0243748	0.388328	↑
MSTRG.26123	antisense	7.64715	-0.874293	0.016612	0.326257	↑
MSTRG.27189	antisense	6.75281	-1.59298	0.0452153	0.490718	↑
MSTRG.34511	antisense	7.30666	-1.14576	0.0275737	0.410165	↑
MSTRG.34608	antisense	1.98107	3.4691	0.0103499	0.254158	↑
MSTRG.34787	antisense	7.5934	-0.891012	0.0324531	0.439136	↑
MSTRG.34898	antisense	7.04745	-1.38804	0.0396181	0.470825	↑
MSTRG.34975	antisense	6.98156	-1.4266	0.0367211	0.457192	↑
MSTRG.35089	antisense	7.17747	-1.2799	0.0335543	0.442704	↑
MSTRG.35972	antisense	7.24365	-1.21048	0.0270963	0.408352	↑
MSTRG.36732	antisense	6.86764	-1.51385	0.0391916	0.469383	↑
MSTRG.38042	antisense	7.99592	-0.577498	0.0117171	0.271886	↑
MSTRG.38377	antisense	7.04839	-1.3639	0.0346435	0.447524	↑
MSTRG.39281	antisense	8.76617	0.117403	0.00483533	0.164815	↑
MSTRG.40236	antisense	8.07917	-0.493369	0.00939267	0.238717	↑
MSTRG.41665	antisense	8.32348	-0.273361	0.00642687	0.191849	↑
MSTRG.41955	antisense	9.84814	1.14978	0.000145087	0.0196976	↑
MSTRG.47122	antisense	6.78232	-1.5729	0.0428078	0.482867	↑
MSTRG.52706	antisense	6.7139	-1.62692	0.0453458	0.490718	↑
MSTRG.60154	antisense	3.30594	1.59403	0.0178465	0.33871	↑
MSTRG.62031	antisense	6.66916	-1.66919	0.0486841	0.503993	↑
MSTRG.65742	antisense	9.6151	0.92265	0.000795868	0.0567153	↑
MSTRG.85782	antisense	9.48356	0.80281	0.000319351	0.03224	↑
MSTRG.92162	antisense	7.59472	-0.888018	0.0385368	0.466432	↑
MSTRG.92397	antisense	6.97645	-1.41202	0.038623	0.466541	↑
MSTRG.92579	antisense	6.6875	-1.64067	0.0490783	0.506637	↑
MSTRG.94915	antisense	4.44472	1.55167	0.00456176	0.159686	↑
MSTRG.95926	antisense	8.304	-0.275312	0.0122095	0.276903	↑
MSTRG.96557	antisense	7.14333	-1.29478	0.031427	0.432718	↑
MSTRG.97304	antisense	7.25176	-1.19756	0.0274598	0.409946	↑
MSTRG.144572	intronic	7.78776	-0.760624	0.0154329	0.314664	↑
MSTRG.145597	intronic	7.61209	-0.903696	0.0177437	0.338165	↑
MSTRG.147042	intronic	7.50587	-0.988666	0.020121	0.355914	↑
MSTRG.151586	intronic	2.80944	2.3473	0.0128673	0.285108	↑
MSTRG.152006	intronic	7.51736	-0.984889	0.0201612	0.355914	↑
MSTRG.154176	intronic	8.5709	-0.0621943	0.00590037	0.183771	↑
MSTRG.171521	intronic	6.98843	-1.41559	0.0363651	0.456358	↑
MSTRG.189006	intronic	6.81933	-1.54043	0.0413704	0.475744	↑
MSTRG.25233	intronic	7.24365	-1.21048	0.0270889	0.408352	↑
MSTRG.38813	intronic	6.88283	-1.48987	0.0404871	0.473093	↑
MSTRG.62023	intronic	3.74722	1.74904	0.0261986	0.401371	↑
MSTRG.100538	lincRNA	8.00573	-0.56222	0.010639	0.25756	↑
MSTRG.104258	lincRNA	6.78698	-1.59234	0.0475555	0.500789	↑
MSTRG.106926	lincRNA	7.45378	-1.04174	0.0215396	0.366711	↑
MSTRG.109253	lincRNA	6.86969	-1.48531	0.0486831	0.503993	↑
MSTRG.110010	lincRNA	3.59323	4.72454	1.33005e-07	0.000175779	↑
MSTRG.110189	lincRNA	4.31087	0.212369	0.0410927	0.475247	↑
MSTRG.110740	lincRNA	2.25868	4.11993	0.00161583	0.0866793	↑
MSTRG.113420	lincRNA	5.17511	-0.769525	0.0336126	0.442704	↑
MSTRG.113813	lincRNA	7.83007	-0.694126	0.0190628	0.349115	↑
MSTRG.115641	lincRNA	8.46538	-0.131227	0.00867222	0.228185	↑
MSTRG.120629	lincRNA	7.58627	-0.917804	0.0180032	0.34034	↑
MSTRG.121277	lincRNA	6.93072	-1.43727	0.0471741	0.498732	↑
MSTRG.122871	lincRNA	1.6979	3.18488	0.0494772	0.507927	↑
MSTRG.123241	lincRNA	7.78804	-0.748847	0.0140761	0.298187	↑
MSTRG.125680	lincRNA	2.80855	4.23618	0.000109557	0.0165905	↑
MSTRG.130559	lincRNA	3.04633	1.38864	0.0468733	0.497206	↑
MSTRG.13131	lincRNA	6.3956	0.297379	0.0343905	0.446186	↑
MSTRG.131779	lincRNA	7.14094	-1.27859	0.0341365	0.444463	↑
MSTRG.132581	lincRNA	7.37431	-1.08909	0.0253942	0.394765	↑
MSTRG.133307	lincRNA	6.97813	-1.43217	0.0371973	0.460022	↑
MSTRG.13540	lincRNA	7.83685	-0.705623	0.0133128	0.29017	↑
MSTRG.135865	lincRNA	8.01136	-0.553637	0.0104716	0.255514	↑
MSTRG.137849	lincRNA	7.12602	-1.28124	0.0408154	0.473769	↑
MSTRG.141150	lincRNA	6.18486	0.183599	0.0084703	0.225821	↑
MSTRG.142114	lincRNA	4.90931	-0.238841	0.0307036	0.429522	↑
MSTRG.14215	lincRNA	7.14367	-1.31663	0.0413395	0.475744	↑
MSTRG.143042	lincRNA	5.61392	9.59442	1.55138e-09	8.75679e-06	↑
MSTRG.143066	lincRNA	1.75308	12.3876	0.00970013	0.243972	↑
MSTRG.143419	lincRNA	7.09411	-1.31199	0.0378446	0.464471	↑
MSTRG.144204	lincRNA	8.86707	0.236577	0.00458477	0.159835	↑
MSTRG.146379	lincRNA	2.29704	2.91544	0.0243929	0.388403	↑
MSTRG.147245	lincRNA	6.8753	-1.50175	0.0393245	0.470325	↑
MSTRG.148054	lincRNA	7.14904	-1.30672	0.0355809	0.451951	↑
MSTRG.148410	lincRNA	8.49442	-0.111617	0.00523819	0.172676	↑
MSTRG.148660	lincRNA	4.23989	1.23361	0.018938	0.349085	↑
MSTRG.148672	lincRNA	7.48036	-0.999537	0.0229363	0.378023	↑
MSTRG.148754	lincRNA	7.07584	-1.34136	0.0331626	0.441889	↑
MSTRG.150860	lincRNA	3.39836	2.66418	0.000974684	0.062992	↑
MSTRG.151087	lincRNA	3.60943	0.653076	0.0487759	0.504197	↑
MSTRG.156826	lincRNA	9.69997	1.00359	0.00102523	0.0642904	↑
MSTRG.156841	lincRNA	9.72261	1.02916	0.000197434	0.0237371	↑
MSTRG.159290	lincRNA	7.63148	-0.873267	0.0185214	0.344315	↑
MSTRG.161308	lincRNA	7.16377	-1.26211	0.0321705	0.437901	↑
MSTRG.161373	lincRNA	6.91487	-1.4873	0.0402183	0.472582	↑
MSTRG.162772	lincRNA	8.1838	-0.405814	0.00832533	0.224129	↑
MSTRG.164792	lincRNA	5.38821	-0.588722	0.0264956	0.403744	↑
MSTRG.174053	lincRNA	7.03656	-1.36099	0.0380613	0.464485	↑
MSTRG.177979	lincRNA	8.06425	-0.507656	0.00952706	0.240869	↑
MSTRG.178442	lincRNA	7.14632	-1.31166	0.0374618	0.461918	↑
MSTRG.178861	lincRNA	4.58061	3.20508	0.00048482	0.0415925	↑
MSTRG.179163	lincRNA	6.75281	-1.59298	0.045238	0.490718	↑
MSTRG.179172	lincRNA	6.85995	-1.52618	0.0418256	0.47871	↑
MSTRG.18113	lincRNA	1.80871	4.08695	0.00776261	0.214322	↑
MSTRG.181249	lincRNA	7.34969	-1.11157	0.0251028	0.393669	↑
MSTRG.182320	lincRNA	7.77311	-0.760901	0.0141222	0.298187	↑
MSTRG.182747	lincRNA	6.80234	-1.54124	0.048781	0.504197	↑
MSTRG.183277	lincRNA	5.221	-0.646487	0.0365528	0.457192	↑
MSTRG.185545	lincRNA	6.70943	-1.63386	0.0455406	0.490718	↑
MSTRG.189086	lincRNA	4.61736	-0.00406723	0.0306478	0.429522	↑
MSTRG.190427	lincRNA	2.01813	2.9567	0.0236995	0.383879	↑
MSTRG.190436	lincRNA	2.83514	1.50293	0.0325153	0.439179	↑
MSTRG.193828	lincRNA	3.95435	1.48012	0.0228673	0.377551	↑
MSTRG.194230	lincRNA	6.99711	-1.42481	0.0397628	0.470825	↑
MSTRG.195969	lincRNA	7.55386	-0.941424	0.0193433	0.351608	↑
MSTRG.197065	lincRNA	5.06267	1.19177	0.00609571	0.187244	↑
MSTRG.197292	lincRNA	2.69636	2.07498	0.0207338	0.360332	↑
MSTRG.199724	lincRNA	2.40341	3.35014	0.00943719	0.239016	↑
MSTRG.201142	lincRNA	1.61919	4.26298	0.0478301	0.501958	↑
MSTRG.204701	lincRNA	7.46404	-1.01007	0.024509	0.389186	↑
MSTRG.204809	lincRNA	2.51384	4.21369	0.00908075	0.234063	↑
MSTRG.204949	lincRNA	2.55383	3.85523	0.000739749	0.0541768	↑
MSTRG.205146	lincRNA	4.25929	2.84358	0.00268768	0.11858	↑
MSTRG.205613	lincRNA	3.79036	1.62367	0.0279386	0.412972	↑
MSTRG.206125	lincRNA	5.83256	-0.123301	0.0124973	0.280369	↑
MSTRG.207410	lincRNA	7.97111	-0.587962	0.0109659	0.262415	↑
MSTRG.20786	lincRNA	6.76527	-1.57341	0.0465687	0.495784	↑
MSTRG.213616	lincRNA	2.00456	6.58923	0.00644931	0.192322	↑
MSTRG.21631	lincRNA	6.8239	-1.55875	0.0431057	0.484086	↑
MSTRG.24435	lincRNA	1.82734	7.3406	0.00851932	0.226003	↑
MSTRG.24692	lincRNA	1.51614	4.30691	0.0220078	0.369016	↑
MSTRG.27654	lincRNA	7.04154	-1.39888	0.0445575	0.489063	↑
MSTRG.28536	lincRNA	6.51937	0.438055	0.00294851	0.12515	↑
MSTRG.29255	lincRNA	4.42185	0.176608	0.0434678	0.485713	↑
MSTRG.29283	lincRNA	7.95657	-0.610413	0.0120557	0.275348	↑
MSTRG.31771	lincRNA	7.73041	-0.804597	0.0155421	0.315554	↑
MSTRG.32042	lincRNA	4.43686	-0.0430043	0.0470472	0.498326	↑
MSTRG.33479	lincRNA	3.1191	0.831664	0.0491238	0.506637	↑
MSTRG.34267	lincRNA	3.70802	0.524076	0.0338144	0.443329	↑
MSTRG.34454	lincRNA	5.40231	-0.507369	0.0241778	0.387311	↑
MSTRG.34744	lincRNA	1.3687	4.51157	0.0285989	0.417217	↑
MSTRG.35134	lincRNA	4.49387	0.367986	0.0349089	0.448297	↑
MSTRG.35508	lincRNA	6.97132	-1.44347	0.0389035	0.467545	↑
MSTRG.38820	lincRNA	7.14926	-1.28528	0.0301005	0.426795	↑
MSTRG.47319	lincRNA	2.42151	3.81754	0.0021497	0.104171	↑
MSTRG.48218	lincRNA	5.41561	-0.487309	0.0246474	0.390318	↑
MSTRG.48900	lincRNA	8.6276	0.00530521	0.00354147	0.14141	↑
MSTRG.49389	lincRNA	4.15681	5.18513	0.000501097	0.0418796	↑
MSTRG.49679	lincRNA	5.07306	-0.785255	0.035868	0.453296	↑
MSTRG.53765	lincRNA	7.60548	-0.887113	0.0234184	0.382793	↑
MSTRG.56630	lincRNA	3.27401	3.73486	2.79185e-05	0.00724759	↑
MSTRG.57842	lincRNA	5.16589	-0.699712	0.0346029	0.447524	↑
MSTRG.58042	lincRNA	3.1711	5.39415	3.3851e-05	0.00813404	↑
MSTRG.58618	lincRNA	9.09465	0.438993	0.00107029	0.0661698	↑
MSTRG.59711	lincRNA	7.72864	-0.807405	0.0157205	0.316747	↑
MSTRG.6163	lincRNA	6.89371	-1.47244	0.0442877	0.48791	↑
MSTRG.62621	lincRNA	6.75704	-1.58639	0.043887	0.486012	↑
MSTRG.63357	lincRNA	7.89179	-0.651852	0.012939	0.28565	↑
MSTRG.64366	lincRNA	2.36301	3.13027	0.00634558	0.190465	↑
MSTRG.6505	lincRNA	9.36181	0.690858	0.000465677	0.040905	↑
MSTRG.65838	lincRNA	6.78646	-1.56645	0.0432421	0.484759	↑
MSTRG.6847	lincRNA	7.06314	-1.36169	0.0334784	0.442704	↑
MSTRG.70514	lincRNA	7.1315	-1.3142	0.0335269	0.442704	↑
MSTRG.72583	lincRNA	7.29917	-1.17541	0.0278021	0.412211	↑
MSTRG.78229	lincRNA	1.71548	3.74138	0.0333787	0.442704	↑
MSTRG.78464	lincRNA	3.15011	3.79425	0.00507811	0.169513	↑
MSTRG.80380	lincRNA	6.85901	-1.50291	0.0439783	0.486186	↑
MSTRG.81176	lincRNA	7.18905	-1.2413	0.0309136	0.429694	↑
MSTRG.88159	lincRNA	7.00524	-1.38886	0.0382665	0.465784	↑
MSTRG.88696	lincRNA	7.47605	-1.00639	0.0220588	0.369022	↑
MSTRG.90661	lincRNA	7.54352	-0.957667	0.0191426	0.34992	↑
MSTRG.912	lincRNA	7.09038	-1.33901	0.0331928	0.442089	↑
MSTRG.92448	lincRNA	1.50169	5.0842	0.0302585	0.426864	↑
MSTRG.92583	lincRNA	7.7046	-0.821227	0.0157135	0.316747	↑
MSTRG.92975	lincRNA	6.77394	-1.58601	0.0426867	0.48231	↑
MSTRG.95614	lincRNA	7.3435	-1.10348	0.0342336	0.445145	↑
MSTRG.96234	lincRNA	8.06156	-0.511734	0.00981991	0.246558	↑
MSTRG.99945	lincRNA	7.04744	-1.38804	0.0396001	0.470825	↑
ENSSSCG00000030846	antisense	-3.83223	2.68761	0.00163643	0.0871412	↓
MSTRG.136302	antisense	-5.1257	-0.187229	0.0452546	0.490718	↓
MSTRG.206638	antisense	-7.92083	-0.665727	0.0463671	0.494724	↓
MSTRG.36053	antisense	-5.15374	-0.658869	0.0294563	0.422518	↓
MSTRG.38240	antisense	-2.41652	5.37722	0.00321916	0.13302	↓
MSTRG.131829	intronic	-5.19457	0.488961	0.0120174	0.275123	↓
MSTRG.102658	lincRNA	-1.97812	5.22844	0.0147545	0.306858	↓
MSTRG.109915	lincRNA	-3.20235	1.13154	0.0353175	0.450772	↓
MSTRG.114569	lincRNA	-1.62828	6.10241	0.0182369	0.341437	↓
MSTRG.114610	lincRNA	-8.334	-0.291444	0.0320979	0.437323	↓
MSTRG.117900	lincRNA	-2.73168	5.58038	0.00823032	0.223016	↓
MSTRG.118517	lincRNA	-8.78227	0.123754	0.00561478	0.179791	↓
MSTRG.120310	lincRNA	-2.90519	1.08371	0.0487472	0.504197	↓
MSTRG.120616	lincRNA	-5.10864	6.28922	0.0009352	0.061518	↓
MSTRG.120648	lincRNA	-4.3397	3.79024	0.000857513	0.0597043	↓
MSTRG.124042	lincRNA	-7.30523	-1.21692	0.0311402	0.431701	↓
MSTRG.126734	lincRNA	-1.56576	14.9176	0.0479087	0.502143	↓
MSTRG.130451	lincRNA	-3.09029	3.33714	0.00590259	0.183771	↓
MSTRG.133526	lincRNA	-2.87381	1.67742	0.0376449	0.462997	↓
MSTRG.153035	lincRNA	-7.29645	-1.21396	0.0298042	0.425127	↓
MSTRG.163943	lincRNA	-7.86342	-0.71688	0.0483512	0.503514	↓
MSTRG.170297	lincRNA	-4.88018	0.784705	0.00797325	0.218907	↓
MSTRG.170690	lincRNA	-4.63658	1.34306	0.0336812	0.442704	↓
MSTRG.180037	lincRNA	-8.65482	0.00556083	0.0221572	0.370029	↓
MSTRG.184856	lincRNA	-6.96239	-1.49278	0.0390761	0.46851	↓
MSTRG.18654	lincRNA	-4.49021	-0.152578	0.0291737	0.420761	↓
MSTRG.189419	lincRNA	-2.43792	2.67063	0.0324727	0.439136	↓
MSTRG.189879	lincRNA	-7.97604	-0.616322	0.0439356	0.486012	↓
MSTRG.19864	lincRNA	-6.81266	-1.61682	0.0430325	0.484049	↓
MSTRG.199109	lincRNA	-8.18491	-0.428521	0.0187039	0.346045	↓
MSTRG.205003	lincRNA	-1.41958	5.64839	0.03073	0.429522	↓
MSTRG.205184	lincRNA	-3.68515	1.42553	0.0237401	0.384317	↓
MSTRG.210533	lincRNA	-5.62703	0.22103	0.018679	0.345917	↓
MSTRG.219037	lincRNA	-2.2506	3.9417	0.0106179	0.25755	↓
MSTRG.34001	lincRNA	-7.66119	-0.900863	0.0180988	0.340523	↓
MSTRG.34689	lincRNA	-2.46247	3.75567	0.025973	0.399415	↓
MSTRG.45734	lincRNA	-4.65026	-0.466954	0.0288294	0.418271	↓
MSTRG.47518	lincRNA	-5.78767	2.89069	0.000382572	0.0363506	↓
MSTRG.47526	lincRNA	-2.44754	2.38062	0.0245553	0.389497	↓
MSTRG.481	lincRNA	-7.97604	-0.616322	0.0439263	0.486012	↓
MSTRG.6003	lincRNA	-2.46759	4.47791	0.000368425	0.0355231	↓
MSTRG.6231	lincRNA	-8.69843	0.0371084	0.00554841	0.178451	↓
MSTRG.65075	lincRNA	-3.92889	0.527712	0.0322522	0.438008	↓
MSTRG.66965	lincRNA	-2.32464	5.02023	0.000494866	0.0415925	↓
MSTRG.68802	lincRNA	-4.48583	-0.0116847	0.0338232	0.443329	↓
MSTRG.90579	lincRNA	-2.49682	3.15045	0.0356885	0.452329	↓

## Sheet: DE circRNA
Different Expressed circRNA of two stages
circRNA ID	logFC	logCPM	p-value	FDR	up-expression ↑down-expression ↓
circRNA005658	10.2954	1.5864	8.88964e-06	0.00428984	↑
circRNA003461	9.45337	0.774723	0.0003616	0.0463762	↑
circRNA017140	9.24323	0.574305	0.000733168	0.0698413	↑
circRNA008069	9.12013	0.454034	0.0014618	0.105653	↑
circRNA004968	8.78678	0.146777	0.00246761	0.145601	↑
circRNA010411	8.76073	0.122045	0.00267104	0.153784	↑
circRNA004290	8.77922	0.137162	0.00269111	0.154455	↑
circRNA016580	8.73769	0.101303	0.00275392	0.155624	↑
circRNA004225	8.72036	0.0850709	0.00292364	0.160579	↑
circRNA004284	8.74105	0.0996856	0.00325248	0.17066	↑
circRNA010942	8.58911	-0.0354537	0.00384486	0.189275	↑
circRNA008086	8.52347	-0.0991803	0.00475701	0.212501	↑
circRNA010409	8.48186	-0.138374	0.00543821	0.226867	↑
circRNA008087	8.47153	-0.147999	0.00566354	0.23182	↑
circRNA006948	8.38527	-0.223942	0.00612302	0.24043	↑
circRNA019689	8.44425	-0.176173	0.00684368	0.257046	↑
circRNA001981	8.49006	-0.136033	0.00705409	0.262222	↑
circRNA000474	8.27256	-0.321908	0.00752329	0.271839	↑
circRNA020544	8.37056	-0.244011	0.00797382	0.279847	↑
circRNA017451	8.22546	-0.364264	0.00826748	0.284437	↑
circRNA001517	8.28711	-0.317765	0.00859415	0.291843	↑
circRNA004644	8.16264	-0.421334	0.00924714	0.300883	↑
circRNA004026	8.18873	-0.403056	0.00929972	0.301296	↑
circRNA003597	8.11795	-0.464447	0.0102567	0.320614	↑
circRNA016620	7.99756	-0.564501	0.0124687	0.361668	↑
circRNA000389	7.94242	-0.619306	0.0137314	0.377957	↑
circRNA003494	7.83881	-0.709257	0.015947	0.414204	↑
circRNA008519	8.07001	-0.519162	0.0159955	0.414879	↑
circRNA009730	7.83705	-0.711746	0.0160182	0.414879	↑
circRNA004555	7.82084	-0.726173	0.0162117	0.416835	↑
circRNA008674	7.78035	-0.757251	0.017104	0.427016	↑
circRNA009761	7.77479	-0.765106	0.0171728	0.427863	↑
circRNA000619	7.78785	-0.755492	0.0172809	0.429098	↑
circRNA019032	5.04047	0.481094	0.0182084	0.439719	↑
circRNA000554	7.79493	-0.736709	0.0182304	0.439719	↑
circRNA009929	7.80483	-0.749318	0.0192598	0.448319	↑
circRNA000535	7.69004	-0.83884	0.0196181	0.452511	↑
circRNA016052	7.68805	-0.84169	0.0197724	0.454073	↑
circRNA001186	7.7019	-0.831664	0.0199497	0.45643	↑
circRNA001771	7.64167	-0.877869	0.0210465	0.469562	↑
circRNA008119	7.63959	-0.880831	0.0210762	0.469605	↑
circRNA001982	7.95765	-0.622098	0.0223519	0.48297	↑
circRNA011575	7.57245	-0.934441	0.022967	0.488447	↑
circRNA007041	7.55296	-0.951284	0.0231413	0.489473	↑
circRNA005271	7.56997	-0.94923	0.0246382	0.502842	↑
circRNA013186	7.49049	-1.00647	0.0249032	0.505157	↑
circRNA010624	7.48577	-1.01327	0.0250184	0.506678	↑
circRNA016903	7.63557	-0.897598	0.0250199	0.506678	↑
circRNA011800	7.53503	-0.977243	0.0250946	0.507636	↑
circRNA002058	7.56567	-0.955688	0.0258225	0.515789	↑
circRNA004582	7.46743	-1.02771	0.0259121	0.516097	↑
circRNA013607	7.48341	-1.01669	0.0259209	0.516097	↑
circRNA006684	7.54822	-0.969728	0.0262999	0.519519	↑
circRNA007180	7.51043	-1.00155	0.0271408	0.52666	↑
circRNA004556	7.43006	-1.05694	0.0272558	0.526941	↑
circRNA013888	7.41271	-1.08238	0.0299959	0.548331	↑
circRNA013182	7.41271	-1.08238	0.0300141	0.548331	↑
circRNA004385	7.34977	-1.1207	0.0301734	0.548552	↑
circRNA005033	7.37634	-1.10908	0.0302911	0.550012	↑
circRNA004344	7.35393	-1.12834	0.0306631	0.552442	↑
circRNA014799	7.37378	-1.11289	0.0308336	0.553315	↑
circRNA016056	7.33382	-1.14393	0.031611	0.558955	↑
circRNA000465	7.33382	-1.14393	0.0316246	0.558955	↑
circRNA005936	7.40782	-1.08982	0.0317483	0.559728	↑
circRNA006253	7.53758	-0.986372	0.0322192	0.56349	↑
circRNA002942	7.30383	-1.15946	0.0325246	0.566611	↑
circRNA000813	7.30801	-1.16771	0.0325456	0.566611	↑
circRNA019799	7.51759	-1.0042	0.0332261	0.572608	↑
circRNA018861	7.28448	-1.18784	0.0340049	0.57742	↑
circRNA018102	7.25636	-1.19936	0.034119	0.578451	↑
circRNA005774	7.24775	-1.21192	0.0345815	0.58088	↑
circRNA010841	7.24487	-1.21616	0.0349563	0.581012	↑
circRNA004991	3.85236	1.37846	0.0349662	0.581012	↑
circRNA004126	7.24069	-1.20715	0.0354182	0.58354	↑
circRNA003907	7.27899	-1.19616	0.0356661	0.586046	↑
circRNA007489	7.18204	-1.2615	0.0375384	0.596472	↑
circRNA008115	7.15327	-1.28742	0.0376049	0.596472	↑
circRNA009340	7.18928	-1.267	0.0378906	0.596472	↑
circRNA014489	7.147	-1.29663	0.0379738	0.596472	↑
circRNA001484	7.23056	-1.23774	0.0384343	0.599321	↑
circRNA017164	7.29466	-1.18825	0.0388595	0.60312	↑
circRNA007809	7.13661	-1.29531	0.0392424	0.604484	↑
circRNA006836	7.43702	-1.07429	0.0392935	0.604484	↑
circRNA013463	7.11747	-1.32343	0.0407329	0.615524	↑
circRNA014498	7.0971	-1.33622	0.0414408	0.620598	↑
circRNA010867	7.15764	-1.29796	0.0417479	0.620598	↑
circRNA002648	7.09056	-1.34596	0.0425395	0.626871	↑
circRNA000605	7.18042	-1.28066	0.0425657	0.626871	↑
circRNA020023	7.05983	-1.37393	0.0446757	0.638536	↑
circRNA012137	7.10485	-1.34285	0.0454303	0.642615	↑
circRNA020198	7.03517	-1.3922	0.045444	0.642615	↑
circRNA014207	7.03517	-1.3922	0.0454517	0.642615	↑
circRNA014547	7.00612	-1.39785	0.0464533	0.646909	↑
circRNA003591	7.1747	-1.28993	0.0468096	0.647528	↑
circRNA017868	7.03179	-1.39739	0.0468749	0.647528	↑
circRNA001238	7.03179	-1.39739	0.046896	0.647528	↑
circRNA008219	6.96252	-1.44268	0.0471039	0.647528	↑
circRNA000675	7.00668	-1.41594	0.0486145	0.656216	↑
circRNA021022	6.94379	-1.45064	0.0489366	0.657262	↑
circRNA015903	6.91346	-1.47511	0.0489516	0.657262	↑
circRNA015638	7.05326	-1.38415	0.0490316	0.657262	↑
circRNA001418	6.93252	-1.46715	0.0490684	0.657262	↑
circRNA014507	6.92875	-1.47275	0.0495596	0.660944	↑
circRNA000062	-8.26369	-0.354026	0.0161943	0.416835	↓
circRNA018107	-8.01097	-0.584008	0.0179623	0.43801	↓
circRNA006188	-8.62221	-0.0224001	0.0243503	0.502277	↓
circRNA004259	-5.24834	-0.568367	0.0336665	0.57509	↓
circRNA007789	-8.29713	-0.322474	0.0355408	0.584774	↓
circRNA001579	-3.03198	1.16605	0.037228	0.596472	↓
circRNA009925	-8.20868	-0.403163	0.0391778	0.604484	↓
circRNA014623	-4.94075	-0.397522	0.0392859	0.604484	↓
circRNA010811	-8.06492	-0.533334	0.0455467	0.642828	↓
circRNA004165	-8.06491	-0.533334	0.045572	0.642828	↓
circRNA008728	-8.0395	-0.556216	0.0467234	0.647528	↓
circRNA005825	-8.01362	-0.579467	0.0480936	0.652064	↓
circRNA002483	-7.98728	-0.603099	0.0489797	0.657262	↓
