# Supplementary material for: Dynamic Changes of DNA Methylation and Transcriptome Expression in Porcine Ovaries during Aging
Source: Biomed Res Int. 2019 Oct 30;2019:8732023. doi: 10.1155/2019/8732023 (PMC6874880; doi:10.1155/2019/8732023)
Supplement: Supplementary Materials — Table S1: primer sequences for q-PCR. Table S2: summary of sequence data and read-alignment statistics. Table S3: percentage of cytosine methylation after extraction. Table S4: association analysis of regulated genes between both ovarian development stages. Table S5: overlap between different methylation regions and differentially expressed genes. Figure S1: DNA methylation levels of CpG CHG and CHH on each chromosome. Figure S2: Pearson's correlation between DNA methylation level and chromosomal features. (A) Scatter plot and trend line (Pearson's correlation), indicating the correlation between the chromosome length and methylation level. (B) Scatter plot and trend line (Pearson's correlation), indicating the correlation between the chromosome GC content and methylation level. (C) Scatter plot and trend line (Pearson's correlation), indicating the correlation between the gene number in chromosome and methylation. (D) Scatter plot and trend line (Pearson's correlation), indicating the correlation between the chromosome CGI ratio and methylation level. (E) Scatter plot and trend line (Pearson's correlation), indicating the correlation between the chromosome repeat number and methylation level. Figure S3: verification of whole genome bisulfite and RNA sequencing data. (A) DNA methylation was verified via bisulfite sequencing PCR. The expression levels of mRNAs (B), miRNAs (C), lncRNAs (D), and circRNAs (E) were verified via q-PCR and adjusted by three endogenous control genes (porcine GAPDH, ACTB, and U6 snRNA). Figure S4: DNA methylation levels and RNA expression levels on each chromosome. Supplementary Database S1: summary and function enrichment of different methylation regions. Supplementary Database S2: identified mRNAs, miRNAs, lncRNAs, and circRNAs in all samples. Supplementary Database S3: differentially expressed mRNAs, miRNAs, lncRNAs, and circRNAs between both stages. Supplementary Database S4: GO analysis of differentially expressed RNAs and function over [file 8732023.f1.zip › 8732023.f1/Supplementary Database 4.xls]

## Sheet: GO enrichment of DE mRNA
GO enrichment of different expressed mRNA
Category	p-value	q-value	Different Expressed	Background	Term	Ontology	Different Expressed Gene ID	Gene Symbol
GO:0045071	1.35e-09	1.84e-05	8	22	negative regulation of viral genome replication	BP	ENSSSCG00000027982,ENSSSCG00000010453,ENSSSCG00000012077,ENSSSCG00000008648,ENSSSCG00000013664,ENSSSCG00000024867,ENSSSCG00000005926,ENSSSCG00000022913	ISG15,IFIT1,MX1,RSAD2,C19orf66,ISG20,PARP10,SLPI
GO:0051607	9.97e-08	0.000679352	11	102	defense response to virus	BP	ENSSSCG00000027982,ENSSSCG00000010452,ENSSSCG00000010453,ENSSSCG00000012077,ENSSSCG00000012076,ENSSSCG00000008648,ENSSSCG00000008977,ENSSSCG00000029328,ENSSSCG00000013664,ENSSSCG00000024867,ENSSSCG00000009881	ISG15,IFIT3,IFIT1,MX1,MX2,RSAD2,CXCL10,--,C19orf66,ISG20,OAS2
GO:0005576	2.57e-06	0.0113851	25	676	extracellular region	CC	ENSSSCG00000016178,ENSSSCG00000027982,ENSSSCG00000022506,ENSSSCG00000008948,ENSSSCG00000008723,ENSSSCG00000010023,ENSSSCG00000003088,ENSSSCG00000009219,ENSSSCG00000002669,ENSSSCG00000008977,ENSSSCG00000008557,ENSSSCG00000027638,ENSSSCG00000005216,ENSSSCG00000011683,ENSSSCG00000000010,ENSSSCG00000028022,ENSSSCG00000007501,ENSSSCG00000020963,ENSSSCG00000000261,ENSSSCG00000009565,ENSSSCG00000013418,…	--,ISG15,--,ALB,HTRA3,PLA2G3,APOE,IBSP,CRISPLD2,CXCL10,EMILIN1,--,--,PCOLCE2,--,COL6A2,BMP7,--,IGFBP6,GAS6,CFD,WISP2,SLPI,INHA,DMBT1
GO:0009615	3.34e-06	0.0113851	8	54	response to virus	BP	ENSSSCG00000010452,ENSSSCG00000010453,ENSSSCG00000012077,ENSSSCG00000012076,ENSSSCG00000008648,ENSSSCG00000030408,ENSSSCG00000017416,ENSSSCG00000024867	IFIT3,IFIT1,MX1,MX2,RSAD2,DDX58,DHX58,ISG20
GO:0008201	6.15e-06	0.0167615	9	80	heparin binding	MF	ENSSSCG00000006288,ENSSSCG00000005751,ENSSSCG00000003088,ENSSSCG00000002669,ENSSSCG00000008977,ENSSSCG00000011683,ENSSSCG00000014047,ENSSSCG00000000918,ENSSSCG00000007379	SELP,COL5A1,APOE,CRISPLD2,CXCL10,PCOLCE2,FGFR4,EPYC,WISP2
GO:0005520	1.82e-05	0.0372617	5	24	insulin-like growth factor binding	MF	ENSSSCG00000016178,ENSSSCG00000030560,ENSSSCG00000008723,ENSSSCG00000000261,ENSSSCG00000007379	--,--,HTRA3,IGFBP6,WISP2
GO:0032020	1.91e-05	0.0372617	3	5	ISG15-protein conjugation	BP	ENSSSCG00000027982,ENSSSCG00000030548,ENSSSCG00000023379	ISG15,--,UBE2L6
GO:0042802	3.81e-05	0.0649634	19	390	identical protein binding	MF	ENSSSCG00000010452,ENSSSCG00000030095,ENSSSCG00000008697,ENSSSCG00000008948,ENSSSCG00000003088,ENSSSCG00000011643,ENSSSCG00000030408,ENSSSCG00000030839,ENSSSCG00000028197,ENSSSCG00000008557,ENSSSCG00000005177,ENSSSCG00000029328,ENSSSCG00000010682,ENSSSCG00000016777,ENSSSCG00000003342,ENSSSCG00000010537,ENSSSCG00000026943,ENSSSCG00000012793,ENSSSCG00000013021	IFIT3,ZBTB16,HTT,ALB,APOE,--,DDX58,JUN,PFKL,EMILIN1,SH3GL2,--,PRDX3,ZNF212,DVL1,GOT1,MRAP2,HCFC1,SF1
GO:0005578	0.00012017	0.181923	12	181	proteinaceous extracellular matrix	CC	ENSSSCG00000016848,ENSSSCG00000022506,ENSSSCG00000005751,ENSSSCG00000002669,ENSSSCG00000008557,ENSSSCG00000002341,ENSSSCG00000016364,ENSSSCG00000005487,ENSSSCG00000000010,ENSSSCG00000028022,ENSSSCG00000000918,ENSSSCG00000007379	EGFLAM,--,COL5A1,CRISPLD2,EMILIN1,PAPLN,GPC1,--,--,COL6A2,EPYC,WISP2
GO:0000981	0.000149433	0.197535	11	176	RNA polymerase II transcription factor activity, sequence-specific DNA binding	MF	ENSSSCG00000007823,ENSSSCG00000003326,ENSSSCG00000003998,ENSSSCG00000030839,ENSSSCG00000007312,ENSSSCG00000003702,ENSSSCG00000013735,ENSSSCG00000024661,ENSSSCG00000007576,ENSSSCG00000017251,ENSSSCG00000001561	--,PEG3,ZNF274,JUN,SCAND1,GATA6,--,ZNF524,FOXK1,SOX9,ETV7
GO:0031012	0.000159477	0.197535	11	154	extracellular matrix	CC	ENSSSCG00000022506,ENSSSCG00000005751,ENSSSCG00000003088,ENSSSCG00000009219,ENSSSCG00000010728,ENSSSCG00000008557,ENSSSCG00000002341,ENSSSCG00000003514,ENSSSCG00000028022,ENSSSCG00000003351,ENSSSCG00000022913	--,COL5A1,APOE,IBSP,CPXM2,EMILIN1,PAPLN,--,COL6A2,MMP23B,SLPI
GO:0055089	0.000197528	0.224277	3	7	fatty acid homeostasis	BP	ENSSSCG00000003088,ENSSSCG00000003216,ENSSSCG00000010537	APOE,POLD1,GOT1
GO:0032496	0.000279962	0.293422	7	91	response to lipopolysaccharide	BP	ENSSSCG00000030839,ENSSSCG00000014322,ENSSSCG00000008977,ENSSSCG00000014825,ENSSSCG00000010682,ENSSSCG00000013735,ENSSSCG00000022913	JUN,HNRNPA0,CXCL10,RELT,PRDX3,--,SLPI
GO:0070168	0.000347992	0.338671	2	2	negative regulation of biomineral tissue development	BP	ENSSSCG00000009565,ENSSSCG00000017251	GAS6,SOX9
GO:0034340	0.000626904	0.539171	2	3	response to type I interferon	BP	ENSSSCG00000027982,ENSSSCG00000013664	ISG15,C19orf66
GO:0000975	0.000641235	0.539171	3	14	regulatory region DNA binding	MF	ENSSSCG00000022547,ENSSSCG00000005437,ENSSSCG00000012853	--,KLF4,IRF7
GO:0042296	0.000672727	0.539171	2	3	ISG15 transferase activity	MF	ENSSSCG00000030548,ENSSSCG00000023379	--,UBE2L6
GO:0030198	0.000782889	0.591103	6	59	extracellular matrix organization	BP	ENSSSCG00000016848,ENSSSCG00000009219,ENSSSCG00000002669,ENSSSCG00000008557,ENSSSCG00000000010,ENSSSCG00000017251	EGFLAM,IBSP,CRISPLD2,EMILIN1,--,SOX9
GO:0071357	0.000880444	0.591103	2	3	cellular response to type I interferon	BP	ENSSSCG00000010453,ENSSSCG00000012077	IFIT1,MX1
GO:0019941	0.000903175	0.591103	2	4	modification-dependent protein catabolic process	BP	ENSSSCG00000027982,ENSSSCG00000023379	ISG15,UBE2L6
GO:0050711	0.000911058	0.591103	2	3	negative regulation of interleukin-1 secretion	BP	ENSSSCG00000001912,ENSSSCG00000009565	PML,GAS6
GO:0072112	0.00155485	0.96295	2	4	glomerular visceral epithelial cell differentiation	BP	ENSSSCG00000026755,ENSSSCG00000013316	KLF15,WT1
GO:0033159	0.00172648	0.996669	2	4	negative regulation of protein import into nucleus, translocation	BP	ENSSSCG00000005926,ENSSSCG00000009565	PARP10,GAS6
GO:0003700	0.00176171	0.996669	24	753	transcription factor activity, sequence-specific DNA binding	MF	ENSSSCG00000006276,ENSSSCG00000023704,ENSSSCG00000026755,ENSSSCG00000007823,ENSSSCG00000003326,ENSSSCG00000022547,ENSSSCG00000003998,ENSSSCG00000004859,ENSSSCG00000030839,ENSSSCG00000005437,ENSSSCG00000007312,ENSSSCG00000003702,ENSSSCG00000030108,ENSSSCG00000007559,ENSSSCG00000013735,ENSSSCG00000000075,ENSSSCG00000012853,ENSSSCG00000007967,ENSSSCG00000013316,ENSSSCG00000008047,ENSSSCG00000007576,…	CEBPD,--,KLF15,--,PEG3,--,ZNF274,ZNF516,JUN,KLF4,SCAND1,GATA6,--,MAFK,--,MKL1,IRF7,ZNF213,WT1,E4F1,FOXK1,SOX9,ETV7,--
GO:0051726	0.00189037	0.996669	6	78	regulation of cell cycle	BP	ENSSSCG00000012076,ENSSSCG00000030839,ENSSSCG00000005920,ENSSSCG00000013735,ENSSSCG00000009585,ENSSSCG00000020771	MX2,JUN,BOP1,--,GADD45G,INHA
GO:0001558	0.0019019	0.996669	4	34	regulation of cell growth	BP	ENSSSCG00000016178,ENSSSCG00000008723,ENSSSCG00000000261,ENSSSCG00000007379	--,HTRA3,IGFBP6,WISP2
GO:0005515	0.00206823	1	175	8838	protein binding	MF	ENSSSCG00000028102,ENSSSCG00000016848,ENSSSCG00000026631,ENSSSCG00000006276,ENSSSCG00000025188,ENSSSCG00000027982,ENSSSCG00000023032,ENSSSCG00000027173,ENSSSCG00000021006,ENSSSCG00000011521,ENSSSCG00000017823,ENSSSCG00000008061,ENSSSCG00000030560,ENSSSCG00000010099,ENSSSCG00000025717,ENSSSCG00000022734,ENSSSCG00000006288,ENSSSCG00000029773,ENSSSCG00000029463,ENSSSCG00000010452,ENSSSCG00000010453,…	TOLLIP,EGFLAM,SLC25A6,CEBPD,--,ISG15,SCG2,--,--,PDZRN3,--,TCEB2,--,--,HIC1,--,SELP,HIST1H4L,--,IFIT3,IFIT1,GAK,--,ZBTB16,--,TSPO,HIST1H3E,--,HTT,TSPAN12,PML,TCOF1,LETM1,LAMC3,MPG,--,JADE2,AGAP3,ALB,SDCBP2,MX1,--,RNF213,MX2,COL5A1,PPP1R26,VSTM2A,HTRA3,KLF15,RSAD2,--,APOE,WDR24,--,TNRC6C,PPP6R2,TPM2,LMF2,--,MME,GALR2,LRP3,FLNC,USP18,ZNF274,NCK2,DDX58,SEMA3E,--,JUN,PFKL,--,--,CXCL10,DHX58,EMILIN1,SH…
GO:0006567	0.00220543	1	2	5	threonine catabolic process	BP	ENSSSCG00000021767,ENSSSCG00000029945	--,--
GO:0060337	0.00251725	1	2	6	type I interferon signaling pathway	BP	ENSSSCG00000010452,ENSSSCG00000010453	IFIT3,IFIT1
GO:0035239	0.00261966	1	2	5	tube morphogenesis	BP	ENSSSCG00000003702,ENSSSCG00000007501	GATA6,BMP7
GO:1990441	0.00267004	1	2	5	negative regulation of transcription from RNA polymerase II promoter in response to endoplasmic reticulum stress	BP	ENSSSCG00000008144,ENSSSCG00000030839	NCK2,JUN
GO:0015889	0.00269502	1	2	6	cobalamin transport	BP	ENSSSCG00000028162,ENSSSCG00000021713	--,--
GO:0045893	0.00272957	1	15	373	positive regulation of transcription, DNA-templated	BP	ENSSSCG00000030095,ENSSSCG00000026755,ENSSSCG00000004859,ENSSSCG00000030839,ENSSSCG00000023653,ENSSSCG00000005437,ENSSSCG00000003702,ENSSSCG00000014628,ENSSSCG00000000075,ENSSSCG00000012853,ENSSSCG00000003342,ENSSSCG00000007501,ENSSSCG00000012885,ENSSSCG00000007576,ENSSSCG00000017251	ZBTB16,KLF15,ZNF516,JUN,GLIS2,KLF4,GATA6,APBB1,MKL1,IRF7,DVL1,BMP7,LRP5,FOXK1,SOX9
GO:0032727	0.00290278	1	2	5	positive regulation of interferon-alpha production	BP	ENSSSCG00000030408,ENSSSCG00000012853	DDX58,IRF7
GO:0003677	0.00294635	1	31	1121	DNA binding	MF	ENSSSCG00000006276,ENSSSCG00000026336,ENSSSCG00000029773,ENSSSCG00000030095,ENSSSCG00000027435,ENSSSCG00000022537,ENSSSCG00000007982,ENSSSCG00000008948,ENSSSCG00000026755,ENSSSCG00000007823,ENSSSCG00000003998,ENSSSCG00000030408,ENSSSCG00000030839,ENSSSCG00000017416,ENSSSCG00000023653,ENSSSCG00000003216,ENSSSCG00000003702,ENSSSCG00000007559,ENSSSCG00000013735,ENSSSCG00000009761,ENSSSCG00000025229,…	CEBPD,--,HIST1H4L,ZBTB16,HIST1H3E,--,MPG,ALB,KLF15,--,ZNF274,DDX58,JUN,DHX58,GLIS2,POLD1,GATA6,MAFK,--,--,--,IRF7,ZNF524,AHDC1,ZNF213,IER2,E4F1,ZBP1,FOXK1,SOX9,ETV7
GO:0008285	0.00338573	1	10	207	negative regulation of cell proliferation	BP	ENSSSCG00000010452,ENSSSCG00000030095,ENSSSCG00000001912,ENSSSCG00000030839,ENSSSCG00000006464,ENSSSCG00000010322,ENSSSCG00000005437,ENSSSCG00000007501,ENSSSCG00000013316,ENSSSCG00000017251	IFIT3,ZBTB16,PML,JUN,NTRK1,ZNF503,KLF4,BMP7,WT1,SOX9
GO:0031995	0.00346269	1	2	7	insulin-like growth factor II binding	MF	ENSSSCG00000016178,ENSSSCG00000000261	--,IGFBP6
GO:0030195	0.00383491	1	2	6	negative regulation of blood coagulation	BP	ENSSSCG00000003088,ENSSSCG00000007115	APOE,THBD
GO:0010564	0.0039296	1	2	6	regulation of cell cycle process	BP	ENSSSCG00000008047,ENSSSCG00000017251	E4F1,SOX9
GO:0051290	0.00416366	1	2	10	protein heterotetramerization	BP	ENSSSCG00000029773,ENSSSCG00000027435	HIST1H4L,HIST1H3E
GO:0010941	0.00454808	1	2	7	regulation of cell death	BP	ENSSSCG00000030839,ENSSSCG00000013735	JUN,--
GO:0031988	0.00459855	1	2	7	membrane-bounded vesicle	CC	ENSSSCG00000009219,ENSSSCG00000013244	IBSP,--
GO:0070208	0.00470263	1	2	6	protein heterotrimerization	BP	ENSSSCG00000022506,ENSSSCG00000028022	--,COL6A2
GO:0050709	0.00486427	1	2	7	negative regulation of protein secretion	BP	ENSSSCG00000008648,ENSSSCG00000023362	RSAD2,RHBDF2
GO:0005615	0.00489982	1	22	834	extracellular space	CC	ENSSSCG00000016178,ENSSSCG00000023032,ENSSSCG00000006288,ENSSSCG00000008948,ENSSSCG00000003088,ENSSSCG00000009219,ENSSSCG00000010728,ENSSSCG00000015399,ENSSSCG00000008977,ENSSSCG00000003832,ENSSSCG00000028022,ENSSSCG00000007501,ENSSSCG00000000261,ENSSSCG00000017137,ENSSSCG00000009565,ENSSSCG00000000918,ENSSSCG00000027357,ENSSSCG00000014169,ENSSSCG00000013418,ENSSSCG00000007379,ENSSSCG00000022913,…	--,SCG2,SELP,ALB,APOE,IBSP,CPXM2,SEMA3E,CXCL10,TACSTD2,COL6A2,BMP7,IGFBP6,METRNL,GAS6,EPYC,CSTB,PCSK1,CFD,WISP2,SLPI,INHA
GO:0008013	0.00497377	1	5	55	beta-catenin binding	MF	ENSSSCG00000026688,ENSSSCG00000005437,ENSSSCG00000003342,ENSSSCG00000023329,ENSSSCG00000017251	--,KLF4,DVL1,APC2,SOX9
GO:0071363	0.00518503	1	3	21	cellular response to growth factor stimulus	BP	ENSSSCG00000009219,ENSSSCG00000005437,ENSSSCG00000009565	IBSP,KLF4,GAS6
GO:0035457	0.00530158	1	2	6	cellular response to interferon-alpha	BP	ENSSSCG00000010452,ENSSSCG00000009565	IFIT3,GAS6
GO:0005923	0.00537974	1	5	68	bicellular tight junction	CC	ENSSSCG00000011643,ENSSSCG00000030408,ENSSSCG00000017934,ENSSSCG00000017136,ENSSSCG00000010123	--,DDX58,--,TBCD,CLDN5
GO:0009142	0.00543006	1	2	9	nucleoside triphosphate biosynthetic process	BP	ENSSSCG00000008647,ENSSSCG00000008017	CMPK2,NME3
GO:0045597	0.00543559	1	3	25	positive regulation of cell differentiation	BP	ENSSSCG00000030839,ENSSSCG00000013735,ENSSSCG00000007501	JUN,--,BMP7
GO:0007184	0.00571533	1	2	7	SMAD protein import into nucleus	BP	ENSSSCG00000001912,ENSSSCG00000030839	PML,JUN
GO:0016209	0.00586969	1	3	25	antioxidant activity	MF	ENSSSCG00000003088,ENSSSCG00000010682,ENSSSCG00000010340	APOE,PRDX3,FAM213A
GO:0060340	0.00588693	1	2	7	positive regulation of type I interferon-mediated signaling pathway	BP	ENSSSCG00000029328,ENSSSCG00000012853	--,IRF7
GO:0001822	0.00593406	1	5	59	kidney development	BP	ENSSSCG00000011723,ENSSSCG00000023653,ENSSSCG00000008041,ENSSSCG00000007501,ENSSSCG00000029189	MME,GLIS2,PKD1,BMP7,DCHS1
GO:0051591	0.00595374	1	2	7	response to cAMP	BP	ENSSSCG00000030839,ENSSSCG00000013735	JUN,--
GO:0016064	0.00625082	1	2	8	immunoglobulin mediated immune response	BP	ENSSSCG00000021006,ENSSSCG00000012853	--,IRF7
GO:0043567	0.006297	1	2	9	regulation of insulin-like growth factor receptor signaling pathway	BP	ENSSSCG00000016178,ENSSSCG00000000261	--,IGFBP6
GO:0071371	0.00690979	1	2	8	cellular response to gonadotropin stimulus	BP	ENSSSCG00000003702,ENSSSCG00000013316	GATA6,WT1
GO:0031419	0.00713071	1	2	8	cobalamin binding	MF	ENSSSCG00000028162,ENSSSCG00000021713	--,--
GO:0009607	0.00723841	1	2	13	response to biotic stimulus	BP	ENSSSCG00000014565,ENSSSCG00000028736	--,--
GO:0035497	0.0074908	1	2	9	cAMP response element binding	MF	ENSSSCG00000030839,ENSSSCG00000008047	JUN,E4F1
GO:0001823	0.00825586	1	2	9	mesonephros development	BP	ENSSSCG00000030095,ENSSSCG00000007501	ZBTB16,BMP7
GO:0060487	0.00909806	1	2	7	lung epithelial cell differentiation	BP	ENSSSCG00000014802,ENSSSCG00000017251	NUMA1,SOX9
GO:0048407	0.00930363	1	2	8	platelet-derived growth factor binding	MF	ENSSSCG00000022506,ENSSSCG00000005751	--,COL5A1
GO:0005731	0.00964063	1	1	1	nucleolus organizer region	CC	ENSSSCG00000021810	--
GO:0007072	0.00964063	1	1	1	positive regulation of transcription on exit from mitosis	BP	ENSSSCG00000021810	--
GO:0097372	0.00964063	1	1	1	NAD-dependent histone deacetylase activity (H3-K18 specific)	MF	ENSSSCG00000021810	--
GO:0031994	0.00972565	1	2	10	insulin-like growth factor I binding	MF	ENSSSCG00000016178,ENSSSCG00000000261	--,IGFBP6
GO:0044212	0.00972731	1	8	157	transcription regulatory region DNA binding	MF	ENSSSCG00000006276,ENSSSCG00000026755,ENSSSCG00000004859,ENSSSCG00000030839,ENSSSCG00000023653,ENSSSCG00000005437,ENSSSCG00000003702,ENSSSCG00000017251	CEBPD,KLF15,ZNF516,JUN,GLIS2,KLF4,GATA6,SOX9
GO:0003676	0.00978286	1	29	1079	nucleic acid binding	MF	ENSSSCG00000023704,ENSSSCG00000026336,ENSSSCG00000025717,ENSSSCG00000026755,ENSSSCG00000007823,ENSSSCG00000003326,ENSSSCG00000027734,ENSSSCG00000012352,ENSSSCG00000003998,ENSSSCG00000030408,ENSSSCG00000004859,ENSSSCG00000014322,ENSSSCG00000017416,ENSSSCG00000023653,ENSSSCG00000003216,ENSSSCG00000005437,ENSSSCG00000016773,ENSSSCG00000016777,ENSSSCG00000026570,ENSSSCG00000024867,ENSSSCG00000022936,…	--,--,HIC1,KLF15,--,PEG3,TNRC6C,--,ZNF274,DDX58,ZNF516,HNRNPA0,DHX58,GLIS2,POLD1,KLF4,ZNF282,ZNF212,SNAI2,ISG20,FIZ1,ZNF524,ZCCHC14,ZNF213,WT1,E4F1,SF1,PARP14,--
GO:0003335	0.00987194	1	1	1	corneocyte development	BP	ENSSSCG00000027285	DNASE1L2
GO:0006357	0.00988523	1	13	393	regulation of transcription from RNA polymerase II promoter	BP	ENSSSCG00000006276,ENSSSCG00000007823,ENSSSCG00000003998,ENSSSCG00000005437,ENSSSCG00000016777,ENSSSCG00000007312,ENSSSCG00000007559,ENSSSCG00000013735,ENSSSCG00000000075,ENSSSCG00000024661,ENSSSCG00000007576,ENSSSCG00000017251,ENSSSCG00000001561	CEBPD,--,ZNF274,KLF4,ZNF212,SCAND1,MAFK,--,MKL1,ZNF524,FOXK1,SOX9,ETV7
GO:0045595	0.0103015	1	3	28	regulation of cell differentiation	BP	ENSSSCG00000005437,ENSSSCG00000023329,ENSSSCG00000017251	KLF4,APC2,SOX9
GO:0010823	0.0103636	1	1	1	negative regulation of mitochondrion organization	BP	ENSSSCG00000000033	TSPO
GO:1903579	0.0103636	1	1	1	negative regulation of ATP metabolic process	BP	ENSSSCG00000000033	TSPO
GO:0001942	0.0104323	1	3	27	hair follicle development	BP	ENSSSCG00000024712,ENSSSCG00000027285,ENSSSCG00000017251	APCDD1,DNASE1L2,SOX9
GO:0008203	0.0105383	1	3	29	cholesterol metabolic process	BP	ENSSSCG00000003088,ENSSSCG00000025273,ENSSSCG00000012885	APOE,CYP11A1,LRP5
GO:0060395	0.0105983	1	4	50	SMAD protein signal transduction	BP	ENSSSCG00000014303,ENSSSCG00000030839,ENSSSCG00000007501,ENSSSCG00000020771	JADE2,JUN,BMP7,INHA
GO:0009612	0.0106145	1	2	11	response to mechanical stimulus	BP	ENSSSCG00000030839,ENSSSCG00000013735	JUN,--
GO:0032332	0.0109546	1	2	9	positive regulation of chondrocyte differentiation	BP	ENSSSCG00000030095,ENSSSCG00000017251	ZBTB16,SOX9
GO:0010819	0.0112082	1	1	1	regulation of T cell chemotaxis	BP	ENSSSCG00000008977	CXCL10
GO:1901740	0.0112082	1	1	1	negative regulation of myoblast fusion	BP	ENSSSCG00000008977	CXCL10
GO:0006401	0.0112219	1	2	10	RNA catabolic process	BP	ENSSSCG00000024867,ENSSSCG00000009881	ISG20,OAS2
GO:0034504	0.0112255	1	3	23	protein localization to nucleus	BP	ENSSSCG00000003342,ENSSSCG00000007501,ENSSSCG00000017251	DVL1,BMP7,SOX9
GO:0006957	0.0112259	1	1	1	complement activation, alternative pathway	BP	ENSSSCG00000013418	CFD
GO:0004714	0.0116408	1	4	48	transmembrane receptor protein tyrosine kinase activity	MF	ENSSSCG00000030560,ENSSSCG00000021886,ENSSSCG00000006464,ENSSSCG00000014047	--,--,NTRK1,FGFR4
GO:0048468	0.0117119	1	4	57	cell development	BP	ENSSSCG00000010023,ENSSSCG00000003702,ENSSSCG00000007501,ENSSSCG00000020771	PLA2G3,GATA6,BMP7,INHA
GO:0030238	0.0117197	1	2	11	male sex determination	BP	ENSSSCG00000013021,ENSSSCG00000017251	SF1,SOX9
GO:0009314	0.0122897	1	2	11	response to radiation	BP	ENSSSCG00000030839,ENSSSCG00000013735	JUN,--
GO:0046911	0.0129288	1	1	1	metal chelating activity	MF	ENSSSCG00000003088	APOE
GO:0051651	0.0129288	1	1	1	maintenance of location in cell	BP	ENSSSCG00000003088	APOE
GO:1901628	0.0129288	1	1	1	positive regulation of postsynaptic membrane organization	BP	ENSSSCG00000003088	APOE
GO:1901630	0.0129288	1	1	1	negative regulation of presynaptic membrane organization	BP	ENSSSCG00000003088	APOE
GO:1902952	0.0129288	1	1	1	positive regulation of dendritic spine maintenance	BP	ENSSSCG00000003088	APOE
GO:1903002	0.0129288	1	1	1	positive regulation of lipid transport across blood brain barrier	BP	ENSSSCG00000003088	APOE
GO:0045053	0.0130268	1	2	12	protein retention in Golgi apparatus	BP	ENSSSCG00000028754,ENSSSCG00000027318	--,--
GO:0034127	0.0130888	1	1	1	regulation of MyD88-independent toll-like receptor signaling pathway	BP	ENSSSCG00000012853	IRF7
GO:0006700	0.0133677	1	1	1	C21-steroid hormone biosynthetic process	BP	ENSSSCG00000025273	CYP11A1
GO:0008386	0.0133677	1	1	1	cholesterol monooxygenase (side-chain-cleaving) activity	MF	ENSSSCG00000025273	CYP11A1
GO:0004550	0.0136353	1	2	14	nucleoside diphosphate kinase activity	MF	ENSSSCG00000008647,ENSSSCG00000008017	CMPK2,NME3
GO:0006165	0.0136353	1	2	14	nucleoside diphosphate phosphorylation	BP	ENSSSCG00000008647,ENSSSCG00000008017	CMPK2,NME3
GO:0044798	0.0136788	1	2	10	nuclear transcription factor complex	CC	ENSSSCG00000005437,ENSSSCG00000017251	KLF4,SOX9
GO:0005539	0.0139314	1	2	12	glycosaminoglycan binding	MF	ENSSSCG00000016848,ENSSSCG00000002669	EGFLAM,CRISPLD2
GO:0051145	0.0140668	1	2	12	smooth muscle cell differentiation	BP	ENSSSCG00000003702,ENSSSCG00000000075	GATA6,MKL1
GO:0048146	0.0143866	1	3	30	positive regulation of fibroblast proliferation	BP	ENSSSCG00000001912,ENSSSCG00000030839,ENSSSCG00000009565	PML,JUN,GAS6
GO:0032481	0.014427	1	2	11	positive regulation of type I interferon production	BP	ENSSSCG00000017416,ENSSSCG00000012853	DHX58,IRF7
GO:0034673	0.0144462	1	1	1	inhibin-betaglycan-ActRII complex	CC	ENSSSCG00000020771	INHA
GO:0061036	0.0144581	1	2	11	positive regulation of cartilage development	BP	ENSSSCG00000030095,ENSSSCG00000017251	ZBTB16,SOX9
GO:0016504	0.0145664	1	2	9	peptidase activator activity	MF	ENSSSCG00000011683,ENSSSCG00000000010	PCOLCE2,--
GO:0048870	0.0145811	1	2	12	cell motility	BP	ENSSSCG00000013753,ENSSSCG00000002633	IER2,--
GO:0016328	0.0146886	1	3	30	lateral plasma membrane	CC	ENSSSCG00000003832,ENSSSCG00000003342,ENSSSCG00000017136	TACSTD2,DVL1,TBCD
GO:0014898	0.0147836	1	2	12	cardiac muscle hypertrophy in response to stress	BP	ENSSSCG00000026755,ENSSSCG00000003702	KLF15,GATA6
GO:0060444	0.0148678	1	2	10	branching involved in mammary gland duct morphogenesis	BP	ENSSSCG00000001912,ENSSSCG00000012885	PML,LRP5
GO:0034157	0.0149038	1	1	1	positive regulation of toll-like receptor 7 signaling pathway	BP	ENSSSCG00000008648	RSAD2
GO:0034165	0.0149038	1	1	1	positive regulation of toll-like receptor 9 signaling pathway	BP	ENSSSCG00000008648	RSAD2
GO:0045944	0.015339	1	20	692	positive regulation of transcription from RNA polymerase II promoter	BP	ENSSSCG00000006276,ENSSSCG00000001912,ENSSSCG00000026755,ENSSSCG00000003326,ENSSSCG00000017189,ENSSSCG00000008144,ENSSSCG00000030408,ENSSSCG00000030839,ENSSSCG00000029328,ENSSSCG00000023653,ENSSSCG00000005437,ENSSSCG00000003702,ENSSSCG00000007559,ENSSSCG00000013735,ENSSSCG00000008041,ENSSSCG00000000075,ENSSSCG00000012853,ENSSSCG00000007501,ENSSSCG00000012885,ENSSSCG00000017251	CEBPD,PML,KLF15,PEG3,GALR2,NCK2,DDX58,JUN,--,GLIS2,KLF4,GATA6,MAFK,--,PKD1,MKL1,IRF7,BMP7,LRP5,SOX9
GO:0050435	0.015621	1	2	11	beta-amyloid metabolic process	BP	ENSSSCG00000026688,ENSSSCG00000011723	--,MME
GO:0033691	0.0160639	1	1	1	sialic acid binding	MF	ENSSSCG00000006288	SELP
GO:0003905	0.0164505	1	1	1	alkylbase DNA N-glycosylase activity	MF	ENSSSCG00000007982	MPG
GO:0072040	0.0166252	1	1	1	negative regulation of mesenchymal cell apoptotic process involved in nephron morphogenesis	BP	ENSSSCG00000007501	BMP7
GO:0045131	0.0169537	1	1	1	pre-mRNA branch point binding	MF	ENSSSCG00000013021	SF1
GO:0097241	0.0169685	1	1	1	hematopoietic stem cell migration to bone marrow	BP	ENSSSCG00000009565	GAS6
GO:1900142	0.0169685	1	1	1	negative regulation of oligodendrocyte apoptotic process	BP	ENSSSCG00000009565	GAS6
GO:0008743	0.0170324	1	1	1	L-threonine 3-dehydrogenase activity	MF	ENSSSCG00000021767	--
GO:0019518	0.0170324	1	1	1	L-threonine catabolic process to glycine	BP	ENSSSCG00000021767	--
GO:0047801	0.0170528	1	1	1	L-cysteine:2-oxoglutarate aminotransferase activity	MF	ENSSSCG00000010537	GOT1
GO:0019836	0.0172375	1	1	1	hemolysis by symbiont of host erythrocytes	BP	ENSSSCG00000008948	ALB
GO:0031780	0.017415	1	1	1	corticotropin hormone receptor binding	MF	ENSSSCG00000026943	MRAP2
GO:0031783	0.017415	1	1	1	type 5 melanocortin receptor binding	MF	ENSSSCG00000026943	MRAP2
GO:0070996	0.017415	1	1	1	type 1 melanocortin receptor binding	MF	ENSSSCG00000026943	MRAP2
GO:1904515	0.0175522	1	1	1	positive regulation of TORC2 signaling	BP	ENSSSCG00000008022	TELO2
GO:0036462	0.0175617	1	1	1	TRAIL-activated apoptotic signaling pathway	BP	ENSSSCG00000029328	--
GO:0017134	0.0175954	1	2	13	fibroblast growth factor binding	MF	ENSSSCG00000016364,ENSSSCG00000014047	GPC1,FGFR4
GO:0070095	0.0176036	1	1	1	fructose-6-phosphate binding	MF	ENSSSCG00000028197	PFKL
GO:0019785	0.0176119	1	1	1	ISG15-specific protease activity	MF	ENSSSCG00000000774	USP18
GO:0061368	0.0176178	1	1	1	behavioral response to formalin induced pain	BP	ENSSSCG00000006464	NTRK1
GO:0010522	0.0176273	1	1	1	regulation of calcium ion transport into cytosol	BP	ENSSSCG00000001912	PML
GO:0045343	0.0176273	1	1	1	regulation of MHC class I biosynthetic process	BP	ENSSSCG00000001912	PML
GO:0009794	0.0176379	1	1	1	regulation of mitotic cell cycle, embryonic	BP	ENSSSCG00000008047	E4F1
GO:0018377	0.0176622	1	1	1	protein myristoylation	BP	ENSSSCG00000009881	OAS2
GO:0001010	0.0177542	1	1	1	transcription factor activity, sequence-specific DNA binding transcription factor recruiting	MF	ENSSSCG00000005437	KLF4
GO:2000342	0.0177542	1	1	1	negative regulation of chemokine (C-X-C motif) ligand 2 production	BP	ENSSSCG00000005437	KLF4
GO:0004798	0.0177557	1	1	1	thymidylate kinase activity	MF	ENSSSCG00000008647	CMPK2
GO:0006227	0.0177557	1	1	1	dUDP biosynthetic process	BP	ENSSSCG00000008647	CMPK2
GO:0006233	0.0177557	1	1	1	dTDP biosynthetic process	BP	ENSSSCG00000008647	CMPK2
GO:0033862	0.0177557	1	1	1	UMP kinase activity	MF	ENSSSCG00000008647	CMPK2
GO:0032912	0.0177716	1	1	1	negative regulation of transforming growth factor beta2 production	BP	ENSSSCG00000003702	GATA6
GO:0046449	0.0179211	1	1	1	creatinine metabolic process	BP	ENSSSCG00000011723	MME
GO:0034342	0.0179253	1	1	1	response to type III interferon	BP	ENSSSCG00000013664	C19orf66
GO:0001708	0.0179297	1	2	11	cell fate specification	BP	ENSSSCG00000023329,ENSSSCG00000017251	APC2,SOX9
GO:0010847	0.0181557	1	1	1	regulation of chromatin assembly	BP	ENSSSCG00000005926	PARP10
GO:1900045	0.0181557	1	1	1	negative regulation of protein K63-linked ubiquitination	BP	ENSSSCG00000005926	PARP10
GO:0009409	0.0181629	1	2	14	response to cold	BP	ENSSSCG00000004859,ENSSSCG00000017137	ZNF516,METRNL
GO:0003939	0.0182194	1	1	1	L-iditol 2-dehydrogenase activity	MF	ENSSSCG00000004679	SORD
GO:0006060	0.0182194	1	1	1	sorbitol metabolic process	BP	ENSSSCG00000004679	SORD
GO:0006062	0.0182194	1	1	1	sorbitol catabolic process	BP	ENSSSCG00000004679	SORD
GO:0046370	0.0182194	1	1	1	fructose biosynthetic process	BP	ENSSSCG00000004679	SORD
GO:0046526	0.0182194	1	1	1	D-xylulose reductase activity	MF	ENSSSCG00000004679	SORD
GO:0051160	0.0182194	1	1	1	L-xylitol catabolic process	BP	ENSSSCG00000004679	SORD
GO:0051164	0.0182194	1	1	1	L-xylitol metabolic process	BP	ENSSSCG00000004679	SORD
GO:0045004	0.0184762	1	1	1	DNA replication proofreading	BP	ENSSSCG00000003216	POLD1
GO:0048565	0.0190437	1	3	28	digestive tract development	BP	ENSSSCG00000003702,ENSSSCG00000008041,ENSSSCG00000029189	GATA6,PKD1,DCHS1
GO:0030426	0.0193168	1	3	31	growth cone	CC	ENSSSCG00000026688,ENSSSCG00000014628,ENSSSCG00000003342	--,APBB1,DVL1
GO:0016477	0.0197304	1	7	147	cell migration	BP	ENSSSCG00000005751,ENSSSCG00000001873,ENSSSCG00000008144,ENSSSCG00000014047,ENSSSCG00000029189,ENSSSCG00000023329,ENSSSCG00000028878	COL5A1,--,NCK2,FGFR4,DCHS1,APC2,BCAR1
GO:0034097	0.0201427	1	3	38	response to cytokine	BP	ENSSSCG00000001912,ENSSSCG00000030839,ENSSSCG00000013735	PML,JUN,--
GO:0003705	0.0201774	1	3	35	transcription factor activity, RNA polymerase II distal enhancer sequence-specific binding	MF	ENSSSCG00000030839,ENSSSCG00000003702,ENSSSCG00000017251	JUN,GATA6,SOX9
GO:0002683	0.020394	1	1	1	negative regulation of immune system process	BP	ENSSSCG00000017251	SOX9
GO:0003188	0.020394	1	1	1	heart valve formation	BP	ENSSSCG00000017251	SOX9
GO:0003413	0.020394	1	1	1	chondrocyte differentiation involved in endochondral bone morphogenesis	BP	ENSSSCG00000017251	SOX9
GO:0019100	0.020394	1	1	1	male germ-line sex determination	BP	ENSSSCG00000017251	SOX9
GO:0035622	0.020394	1	1	1	intrahepatic bile duct development	BP	ENSSSCG00000017251	SOX9
GO:0060221	0.020394	1	1	1	retinal rod cell differentiation	BP	ENSSSCG00000017251	SOX9
GO:0060517	0.020394	1	1	1	epithelial cell proliferation involved in prostatic bud elongation	BP	ENSSSCG00000017251	SOX9
GO:0060784	0.020394	1	1	1	regulation of cell proliferation involved in tissue homeostasis	BP	ENSSSCG00000017251	SOX9
GO:0061046	0.020394	1	1	1	regulation of branching involved in lung morphogenesis	BP	ENSSSCG00000017251	SOX9
GO:0072034	0.020394	1	1	1	renal vesicle induction	BP	ENSSSCG00000017251	SOX9
GO:0072189	0.020394	1	1	1	ureter development	BP	ENSSSCG00000017251	SOX9
GO:0072197	0.020394	1	1	1	ureter morphogenesis	BP	ENSSSCG00000017251	SOX9
GO:2000794	0.020394	1	1	1	regulation of epithelial cell proliferation involved in lung morphogenesis	BP	ENSSSCG00000017251	SOX9
GO:0045862	0.0205947	1	2	13	positive regulation of proteolysis	BP	ENSSSCG00000029328,ENSSSCG00000014047	--,FGFR4
GO:0032934	0.0207619	1	1	2	sterol binding	MF	ENSSSCG00000003853	--
GO:0034363	0.0207783	1	1	2	intermediate-density lipoprotein particle	CC	ENSSSCG00000003088	APOE
GO:0030023	0.0208391	1	1	1	extracellular matrix constituent conferring elasticity	MF	ENSSSCG00000008557	EMILIN1
GO:0032460	0.0211202	1	1	2	negative regulation of protein oligomerization	BP	ENSSSCG00000027435	HIST1H3E
GO:0017038	0.0218188	1	1	2	protein import	BP	ENSSSCG00000003088	APOE
GO:1900221	0.0218188	1	1	2	regulation of beta-amyloid clearance	BP	ENSSSCG00000003088	APOE
GO:0019046	0.0218456	1	1	1	release from viral latency	BP	ENSSSCG00000012793	HCFC1
GO:0000976	0.0218747	1	3	34	transcription regulatory region sequence-specific DNA binding	MF	ENSSSCG00000000075,ENSSSCG00000017251,ENSSSCG00000023045	MKL1,SOX9,BAHCC1
GO:0035695	0.0221027	1	1	2	mitophagy by induced vacuole formation	BP	ENSSSCG00000008834	--
GO:0034213	0.0221675	1	1	2	quinolinate catabolic process	BP	ENSSSCG00000027454	--
GO:0045351	0.0222563	1	1	2	type I interferon biosynthetic process	BP	ENSSSCG00000012853	IRF7
GO:0004375	0.0228419	1	1	2	glycine dehydrogenase (decarboxylating) activity	MF	ENSSSCG00000005199	--
GO:0009880	0.0229356	1	2	14	embryonic pattern specification	BP	ENSSSCG00000030095,ENSSSCG00000007501	ZBTB16,BMP7
GO:1902608	0.0231762	1	1	2	positive regulation of large conductance calcium-activated potassium channel activity	BP	ENSSSCG00000017189	GALR2
GO:0032608	0.023308	1	1	2	interferon-beta production	BP	ENSSSCG00000012853	IRF7
GO:0045087	0.0233858	1	6	142	innate immune response	BP	ENSSSCG00000021006,ENSSSCG00000001912,ENSSSCG00000030548,ENSSSCG00000030408,ENSSSCG00000013418,ENSSSCG00000022913	--,PML,--,DDX58,CFD,SLPI
GO:0060994	0.0236741	1	1	1	regulation of transcription from RNA polymerase II promoter involved in kidney development	BP	ENSSSCG00000023653	GLIS2
GO:0032091	0.0240168	1	3	38	negative regulation of protein binding	BP	ENSSSCG00000010453,ENSSSCG00000003342,ENSSSCG00000022913	IFIT1,DVL1,SLPI
GO:0030891	0.024224	1	1	2	VCB complex	CC	ENSSSCG00000008061	TCEB2
GO:0043154	0.024358	1	3	43	negative regulation of cysteine-type endopeptidase activity involved in apoptotic process	BP	ENSSSCG00000005437,ENSSSCG00000000075,ENSSSCG00000009565	KLF4,MKL1,GAS6
GO:0045653	0.0251982	1	1	4	negative regulation of megakaryocyte differentiation	BP	ENSSSCG00000029773	HIST1H4L
GO:0043236	0.0253896	1	2	15	laminin binding	MF	ENSSSCG00000022204,ENSSSCG00000016364	--,GPC1
GO:0042287	0.0254993	1	1	2	MHC protein binding	MF	ENSSSCG00000025593	--
GO:0042825	0.0254993	1	1	2	TAP complex	CC	ENSSSCG00000025593	--
GO:0031103	0.0267566	1	1	2	axon regeneration	BP	ENSSSCG00000030839	JUN
GO:0051138	0.0268647	1	1	2	positive regulation of NK T cell differentiation	BP	ENSSSCG00000030095	ZBTB16
GO:0032728	0.026911	1	2	14	positive regulation of interferon-beta production	BP	ENSSSCG00000030408,ENSSSCG00000012853	DDX58,IRF7
GO:0060675	0.0272783	1	1	2	ureteric bud morphogenesis	BP	ENSSSCG00000003832	TACSTD2
GO:0070487	0.0273404	1	1	2	monocyte aggregation	BP	ENSSSCG00000007501	BMP7
GO:0072092	0.027374	1	1	1	ureteric bud invasion	BP	ENSSSCG00000010879	KIF26B
GO:0001889	0.0273962	1	3	33	liver development	BP	ENSSSCG00000030839,ENSSSCG00000003702,ENSSSCG00000008041	JUN,GATA6,PKD1
GO:0030010	0.0274069	1	2	14	establishment of cell polarity	BP	ENSSSCG00000008041,ENSSSCG00000010879	PKD1,KIF26B
GO:0051216	0.0274651	1	3	37	cartilage development	BP	ENSSSCG00000030095,ENSSSCG00000008041,ENSSSCG00000017251	ZBTB16,PKD1,SOX9
GO:0035325	0.0274676	1	1	2	Toll-like receptor binding	MF	ENSSSCG00000028102	TOLLIP
GO:0042127	0.027513	1	7	180	regulation of cell proliferation	BP	ENSSSCG00000030839,ENSSSCG00000008977,ENSSSCG00000014825,ENSSSCG00000005437,ENSSSCG00000013735,ENSSSCG00000017251,ENSSSCG00000020771	JUN,CXCL10,RELT,KLF4,--,SOX9,INHA
GO:0070062	0.0279053	1	40	1778	extracellular exosome	CC	ENSSSCG00000028102,ENSSSCG00000029606,ENSSSCG00000008061,ENSSSCG00000029773,ENSSSCG00000022506,ENSSSCG00000000033,ENSSSCG00000027435,ENSSSCG00000008948,ENSSSCG00000007189,ENSSSCG00000005751,ENSSSCG00000003088,ENSSSCG00000011723,ENSSSCG00000017192,ENSSSCG00000002669,ENSSSCG00000028197,ENSSSCG00000005177,ENSSSCG00000003832,ENSSSCG00000014825,ENSSSCG00000003145,ENSSSCG00000030626,ENSSSCG00000016364,…	TOLLIP,AOX1,TCEB2,HIST1H4L,--,TSPO,HIST1H3E,ALB,SDCBP2,COL5A1,APOE,MME,EVPL,CRISPLD2,PFKL,SH3GL2,TACSTD2,RELT,FUT2,ALDH1L1,GPC1,PRDX3,PCOLCE2,NME3,PKD1,SORD,COL6A2,NUMA1,TTYH3,--,GOT1,IGFBP6,METRNL,GAS6,CSTB,CFD,FAM213A,WISP2,SLPI,PPL
GO:1903147	0.0279249	1	1	2	negative regulation of mitophagy	BP	ENSSSCG00000000033	TSPO
GO:0015909	0.0281227	1	1	2	long-chain fatty acid transport	BP	ENSSSCG00000003088	APOE
GO:0045112	0.0281432	1	1	1	integrin biosynthetic process	BP	ENSSSCG00000005751	COL5A1
GO:0004175	0.0281472	1	4	71	endopeptidase activity	MF	ENSSSCG00000026688,ENSSSCG00000008723,ENSSSCG00000011723,ENSSSCG00000014169	--,HTRA3,MME,PCSK1
GO:0032374	0.0282337	1	1	2	regulation of cholesterol transport	BP	ENSSSCG00000003088	APOE
GO:0004869	0.0283226	1	2	23	cysteine-type endopeptidase inhibitor activity	MF	ENSSSCG00000027357,ENSSSCG00000029289	CSTB,CST9L
GO:0005719	0.0283452	1	2	17	nuclear euchromatin	CC	ENSSSCG00000030839,ENSSSCG00000005437	JUN,KLF4
GO:0035456	0.0283675	1	1	2	response to interferon-beta	BP	ENSSSCG00000017887	XAF1
GO:0006114	0.0284385	1	1	2	glycerol biosynthetic process	BP	ENSSSCG00000010537	GOT1
GO:0042159	0.0284863	1	1	2	lipoprotein catabolic process	BP	ENSSSCG00000003088	APOE
GO:0045662	0.0284923	1	2	18	negative regulation of myoblast differentiation	BP	ENSSSCG00000008977,ENSSSCG00000017251	CXCL10,SOX9
GO:0009987	0.0288989	1	2	14	cellular process	BP	ENSSSCG00000030839,ENSSSCG00000013735	JUN,--
GO:0072190	0.028996	1	1	2	ureter urothelium development	BP	ENSSSCG00000017251	SOX9
GO:0008890	0.0290983	1	1	2	glycine C-acetyltransferase activity	MF	ENSSSCG00000029945	--
GO:0052855	0.0291552	1	1	2	ADP-dependent NAD(P)H-hydrate dehydratase activity	MF	ENSSSCG00000029502	--
GO:0036493	0.029191	1	1	2	positive regulation of translation in response to endoplasmic reticulum stress	BP	ENSSSCG00000008144	NCK2
GO:0034115	0.029382	1	1	2	negative regulation of heterotypic cell-cell adhesion	BP	ENSSSCG00000005437	KLF4
GO:0060761	0.029382	1	1	2	negative regulation of response to cytokine stimulus	BP	ENSSSCG00000005437	KLF4
GO:0000786	0.0295021	1	3	78	nucleosome	CC	ENSSSCG00000029773,ENSSSCG00000027435,ENSSSCG00000022537	HIST1H4L,HIST1H3E,--
GO:0006007	0.0296123	1	1	2	glucose catabolic process	BP	ENSSSCG00000012885	LRP5
GO:0072136	0.0297221	1	1	2	metanephric mesenchymal cell proliferation involved in metanephros development	BP	ENSSSCG00000007501	BMP7
GO:0030156	0.0297296	1	1	1	benzodiazepine receptor binding	MF	ENSSSCG00000017638	TSPOAP1
GO:0010715	0.0300574	1	1	2	regulation of extracellular matrix disassembly	BP	ENSSSCG00000014047	FGFR4
GO:0034124	0.0301819	1	1	2	regulation of MyD88-dependent toll-like receptor signaling pathway	BP	ENSSSCG00000012853	IRF7
GO:0030155	0.0302248	1	3	34	regulation of cell adhesion	BP	ENSSSCG00000001912,ENSSSCG00000008041,ENSSSCG00000017251	PML,PKD1,SOX9
GO:0035754	0.0302555	1	1	2	B cell chemotaxis	BP	ENSSSCG00000009565	GAS6
GO:0005960	0.030307	1	1	3	glycine cleavage complex	CC	ENSSSCG00000005199	--
GO:0032385	0.0303239	1	1	2	positive regulation of intracellular cholesterol transport	BP	ENSSSCG00000003853	--
GO:0035710	0.0304171	1	1	2	CD4-positive, alpha-beta T cell activation	BP	ENSSSCG00000008648	RSAD2
GO:1900028	0.0306093	1	1	3	negative regulation of ruffle assembly	BP	ENSSSCG00000003832	TACSTD2
GO:0034447	0.0307502	1	1	2	very-low-density lipoprotein particle clearance	BP	ENSSSCG00000003088	APOE
GO:0072170	0.0307828	1	1	2	metanephric tubule development	BP	ENSSSCG00000017251	SOX9
GO:0030855	0.0309102	1	3	44	epithelial cell differentiation	BP	ENSSSCG00000028102,ENSSSCG00000003702,ENSSSCG00000007501	TOLLIP,GATA6,BMP7
GO:0043512	0.0310748	1	1	2	inhibin A complex	CC	ENSSSCG00000020771	INHA
GO:2000779	0.0314139	1	1	2	regulation of double-strand break repair	BP	ENSSSCG00000001912	PML
GO:0072125	0.0317721	1	1	2	negative regulation of glomerular mesangial cell proliferation	BP	ENSSSCG00000007501	BMP7
GO:0060090	0.0317967	1	1	2	binding, bridging	MF	ENSSSCG00000009565	GAS6
GO:1900106	0.0320125	1	1	2	positive regulation of hyaluranon cable assembly	BP	ENSSSCG00000007501	BMP7
GO:0004069	0.0322559	1	1	2	L-aspartate:2-oxoglutarate aminotransferase activity	MF	ENSSSCG00000010537	GOT1
GO:0006532	0.0322559	1	1	2	aspartate biosynthetic process	BP	ENSSSCG00000010537	GOT1
GO:0006533	0.0322559	1	1	2	aspartate catabolic process	BP	ENSSSCG00000010537	GOT1
GO:0019550	0.0322559	1	1	2	glutamate catabolic process to aspartate	BP	ENSSSCG00000010537	GOT1
GO:0019551	0.0322559	1	1	2	glutamate catabolic process to 2-oxoglutarate	BP	ENSSSCG00000010537	GOT1
GO:0080130	0.0322559	1	1	2	L-phenylalanine:2-oxoglutarate aminotransferase activity	MF	ENSSSCG00000010537	GOT1
GO:0032489	0.0323704	1	1	3	regulation of Cdc42 protein signal transduction	BP	ENSSSCG00000003088	APOE
GO:0007167	0.0323732	1	1	2	enzyme linked receptor protein signaling pathway	BP	ENSSSCG00000009565	GAS6
GO:2000669	0.0323732	1	1	2	negative regulation of dendritic cell apoptotic process	BP	ENSSSCG00000009565	GAS6
GO:0006477	0.032413	1	1	2	protein sulfation	BP	ENSSSCG00000002737	CHST4
GO:0004609	0.0325544	1	1	2	phosphatidylserine decarboxylase activity	MF	ENSSSCG00000010537	GOT1
GO:0018230	0.0327366	1	2	18	peptidyl-L-cysteine S-palmitoylation	BP	ENSSSCG00000006982,ENSSSCG00000012947	ZDHHC2,--
GO:0035634	0.0328444	1	1	2	response to stilbenoid	BP	ENSSSCG00000000774	USP18
GO:0007023	0.0329957	1	1	2	post-chaperonin tubulin folding pathway	BP	ENSSSCG00000017136	TBCD
GO:0051097	0.0331541	1	1	2	negative regulation of helicase activity	BP	ENSSSCG00000010453	IFIT1
GO:0009913	0.0331646	1	1	2	epidermal cell differentiation	BP	ENSSSCG00000005437	KLF4
GO:0001730	0.0331761	1	1	2	2'-5'-oligoadenylate synthetase activity	MF	ENSSSCG00000009881	OAS2
GO:0072289	0.0331841	1	1	2	metanephric nephron tubule formation	BP	ENSSSCG00000017251	SOX9
GO:0042806	0.0332506	1	1	2	fucose binding	MF	ENSSSCG00000006288	SELP
GO:0071492	0.0332607	1	1	2	cellular response to UV-A	BP	ENSSSCG00000011723	MME
GO:0034382	0.0333579	1	1	3	chylomicron remnant clearance	BP	ENSSSCG00000003088	APOE
GO:0010572	0.0334906	1	1	2	positive regulation of platelet activation	BP	ENSSSCG00000006288	SELP
GO:0003415	0.0335038	1	1	2	chondrocyte hypertrophy	BP	ENSSSCG00000017251	SOX9
GO:0010934	0.0336281	1	1	2	macrophage cytokine production	BP	ENSSSCG00000009565	GAS6
GO:2001016	0.0337752	1	1	2	positive regulation of skeletal muscle cell differentiation	BP	ENSSSCG00000016364	GPC1
GO:2000352	0.0338574	1	2	17	negative regulation of endothelial cell apoptotic process	BP	ENSSSCG00000023032,ENSSSCG00000009565	SCG2,GAS6
GO:0005945	0.0343073	1	1	2	6-phosphofructokinase complex	CC	ENSSSCG00000028197	PFKL
GO:0070061	0.0343073	1	1	2	fructose binding	MF	ENSSSCG00000028197	PFKL
GO:0010465	0.0343397	1	1	2	nerve growth factor receptor activity	MF	ENSSSCG00000006464	NTRK1
GO:0043113	0.0343503	1	2	15	receptor clustering	BP	ENSSSCG00000022204,ENSSSCG00000003342	--,DVL1
GO:0032805	0.0344222	1	1	2	positive regulation of low-density lipoprotein particle receptor catabolic process	BP	ENSSSCG00000003088	APOE
GO:0031781	0.034459	1	1	3	type 3 melanocortin receptor binding	MF	ENSSSCG00000026943	MRAP2
GO:0031782	0.034459	1	1	3	type 4 melanocortin receptor binding	MF	ENSSSCG00000026943	MRAP2
GO:0043027	0.0344771	1	2	20	cysteine-type endopeptidase inhibitor activity involved in apoptotic process	MF	ENSSSCG00000010682,ENSSSCG00000009565	PRDX3,GAS6
GO:0070315	0.0345506	1	1	2	G1 to G0 transition involved in cell differentiation	BP	ENSSSCG00000010322	ZNF503
GO:0000982	0.0346354	1	2	19	transcription factor activity, RNA polymerase II core promoter proximal region sequence-specific binding	MF	ENSSSCG00000030839,ENSSSCG00000012853	JUN,IRF7
GO:0070995	0.034638	1	1	2	NADPH oxidation	BP	ENSSSCG00000015268	FMO1
GO:2000507	0.0346528	1	1	3	positive regulation of energy homeostasis	BP	ENSSSCG00000017137	METRNL
GO:0031092	0.034661	1	1	3	platelet alpha granule membrane	CC	ENSSSCG00000006288	SELP
GO:1901253	0.0347104	1	1	2	negative regulation of intracellular transport of viral material	BP	ENSSSCG00000012077	MX1
GO:0007493	0.0347809	1	1	2	endodermal cell fate determination	BP	ENSSSCG00000003702	GATA6
GO:0039534	0.0347957	1	1	2	negative regulation of MDA-5 signaling pathway	BP	ENSSSCG00000017416	DHX58
GO:0072134	0.0348076	1	1	2	nephrogenic mesenchyme morphogenesis	BP	ENSSSCG00000007501	BMP7
GO:0090103	0.0348432	1	2	16	cochlea morphogenesis	BP	ENSSSCG00000003342,ENSSSCG00000017251	DVL1,SOX9
GO:0032580	0.034858	1	2	17	Golgi cisterna membrane	CC	ENSSSCG00000003145,ENSSSCG00000021610	FUT2,CHPF
GO:0030099	0.0349261	1	2	17	myeloid cell differentiation	BP	ENSSSCG00000001912,ENSSSCG00000010682	PML,PRDX3
GO:0060612	0.0349869	1	2	16	adipose tissue development	BP	ENSSSCG00000004859,ENSSSCG00000012885	ZNF516,LRP5
GO:0051495	0.0350167	1	1	2	positive regulation of cytoskeleton organization	BP	ENSSSCG00000023483	PLXNA3
GO:0060729	0.0351654	1	1	2	intestinal epithelial structure maintenance	BP	ENSSSCG00000017251	SOX9
GO:0032757	0.0351751	1	2	17	positive regulation of interleukin-8 production	BP	ENSSSCG00000030408,ENSSSCG00000029328	DDX58,--
GO:0060764	0.0352364	1	1	2	cell-cell signaling involved in mammary gland development	BP	ENSSSCG00000012885	LRP5
GO:0045345	0.0353798	1	1	2	positive regulation of MHC class I biosynthetic process	BP	ENSSSCG00000001912	PML
GO:0051659	0.0354289	1	1	2	maintenance of mitochondrion location	BP	ENSSSCG00000008948	ALB
GO:0030200	0.0354794	1	1	2	heparan sulfate proteoglycan catabolic process	BP	ENSSSCG00000016364	GPC1
GO:0090184	0.035483	1	1	2	positive regulation of kidney development	BP	ENSSSCG00000017251	SOX9
GO:0043433	0.0355227	1	3	41	negative regulation of sequence-specific DNA binding transcription factor activity	BP	ENSSSCG00000023653,ENSSSCG00000005437,ENSSSCG00000009565	GLIS2,KLF4,GAS6
GO:0010466	0.0356577	1	2	30	negative regulation of peptidase activity	BP	ENSSSCG00000027357,ENSSSCG00000022913	CSTB,SLPI
GO:0043625	0.0357026	1	1	2	delta DNA polymerase complex	CC	ENSSSCG00000003216	POLD1
GO:0035026	0.0357521	1	1	2	leading edge cell differentiation	BP	ENSSSCG00000030839	JUN
GO:0045892	0.0358105	1	11	339	negative regulation of transcription, DNA-templated	BP	ENSSSCG00000006276,ENSSSCG00000030095,ENSSSCG00000001912,ENSSSCG00000030839,ENSSSCG00000023653,ENSSSCG00000005437,ENSSSCG00000003702,ENSSSCG00000007501,ENSSSCG00000009565,ENSSSCG00000007576,ENSSSCG00000017251	CEBPD,ZBTB16,PML,JUN,GLIS2,KLF4,GATA6,BMP7,GAS6,FOXK1,SOX9
GO:0016817	0.0359703	1	2	12	hydrolase activity, acting on acid anhydrides	MF	ENSSSCG00000030408,ENSSSCG00000017416	DDX58,DHX58
GO:0046985	0.0360866	1	1	2	positive regulation of hemoglobin biosynthetic process	BP	ENSSSCG00000005437	KLF4
GO:0006518	0.036406	1	1	2	peptide metabolic process	BP	ENSSSCG00000011723	MME
GO:0043531	0.0366635	1	2	15	ADP binding	MF	ENSSSCG00000029463,ENSSSCG00000010861	--,COQ8A
GO:0051563	0.0369044	1	1	3	smooth endoplasmic reticulum calcium ion homeostasis	BP	ENSSSCG00000026688	--
GO:0006623	0.0369743	1	2	22	protein targeting to vacuole	BP	ENSSSCG00000028754,ENSSSCG00000027318	--,--
GO:1903898	0.0370924	1	1	3	negative regulation of PERK-mediated unfolded protein response	BP	ENSSSCG00000008144	NCK2
GO:0006366	0.0372114	1	5	115	transcription from RNA polymerase II promoter	BP	ENSSSCG00000004859,ENSSSCG00000005437,ENSSSCG00000003702,ENSSSCG00000007559,ENSSSCG00000003342	ZNF516,KLF4,GATA6,MAFK,DVL1
GO:0043462	0.0374823	1	1	3	regulation of ATPase activity	BP	ENSSSCG00000005316	TPM2
GO:0046533	0.0375301	1	1	2	negative regulation of photoreceptor cell differentiation	BP	ENSSSCG00000017251	SOX9
GO:0031513	0.0379645	1	2	16	nonmotile primary cilium	CC	ENSSSCG00000023653,ENSSSCG00000008020	GLIS2,IFT140
GO:0060041	0.0383677	1	3	43	retina development in camera-type eye	BP	ENSSSCG00000005710,ENSSSCG00000008020,ENSSSCG00000017251	LAMC3,IFT140,SOX9
GO:0002053	0.0388441	1	2	17	positive regulation of mesenchymal cell proliferation	BP	ENSSSCG00000012885,ENSSSCG00000017251	LRP5,SOX9
GO:0001735	0.0389489	1	1	2	prenylcysteine oxidase activity	MF	ENSSSCG00000014433	PCYOX1L
GO:0016670	0.0389489	1	1	2	oxidoreductase activity, acting on a sulfur group of donors, oxygen as acceptor	MF	ENSSSCG00000014433	PCYOX1L
GO:0030327	0.0389489	1	1	2	prenylated protein catabolic process	BP	ENSSSCG00000014433	PCYOX1L
GO:0030328	0.0389489	1	1	2	prenylcysteine catabolic process	BP	ENSSSCG00000014433	PCYOX1L
GO:0000003	0.039122	1	1	3	reproduction	BP	ENSSSCG00000003351	MMP23B
GO:0042383	0.0392289	1	3	45	sarcolemma	CC	ENSSSCG00000022506,ENSSSCG00000016578,ENSSSCG00000028022	--,FLNC,COL6A2
GO:0000977	0.0394155	1	7	187	RNA polymerase II regulatory region sequence-specific DNA binding	MF	ENSSSCG00000023653,ENSSSCG00000003702,ENSSSCG00000013735,ENSSSCG00000024661,ENSSSCG00000008047,ENSSSCG00000007576,ENSSSCG00000001561	GLIS2,GATA6,--,ZNF524,E4F1,FOXK1,ETV7
GO:0004514	0.039418	1	1	3	nicotinate-nucleotide diphosphorylase (carboxylating) activity	MF	ENSSSCG00000027454	--
GO:0060532	0.039629	1	1	2	bronchus cartilage development	BP	ENSSSCG00000017251	SOX9
GO:0061145	0.039629	1	1	2	lung smooth muscle development	BP	ENSSSCG00000017251	SOX9
GO:0019060	0.0396342	1	1	3	intracellular transport of viral protein in host cell	BP	ENSSSCG00000010453	IFIT1
GO:0000132	0.0396378	1	2	17	establishment of mitotic spindle orientation	BP	ENSSSCG00000008697,ENSSSCG00000014802	HTT,NUMA1
GO:0060070	0.0398196	1	4	70	canonical Wnt signaling pathway	BP	ENSSSCG00000026688,ENSSSCG00000005437,ENSSSCG00000003342,ENSSSCG00000012885	--,KLF4,DVL1,LRP5
GO:0043066	0.0398201	1	9	272	negative regulation of apoptotic process	BP	ENSSSCG00000026688,ENSSSCG00000010452,ENSSSCG00000008948,ENSSSCG00000030839,ENSSSCG00000010682,ENSSSCG00000003702,ENSSSCG00000013316,ENSSSCG00000009565,ENSSSCG00000017251	--,IFIT3,ALB,JUN,PRDX3,GATA6,WT1,GAS6,SOX9
GO:0046822	0.0398552	1	1	3	regulation of nucleocytoplasmic transport	BP	ENSSSCG00000012076	MX2
GO:0006546	0.0399211	1	1	3	glycine catabolic process	BP	ENSSSCG00000005199	--
GO:0003726	0.0399329	1	1	2	double-stranded RNA adenosine deaminase activity	MF	ENSSSCG00000007508	ZBP1
GO:0033623	0.0399379	1	1	2	regulation of integrin activation	BP	ENSSSCG00000006288	SELP
GO:0021915	0.0400741	1	3	35	neural tube development	BP	ENSSSCG00000008041,ENSSSCG00000003342,ENSSSCG00000029189	PKD1,DVL1,DCHS1
GO:0006355	0.0401585	1	27	1161	regulation of transcription, DNA-templated	BP	ENSSSCG00000006276,ENSSSCG00000023704,ENSSSCG00000030095,ENSSSCG00000001912,ENSSSCG00000007823,ENSSSCG00000003326,ENSSSCG00000022547,ENSSSCG00000003998,ENSSSCG00000030839,ENSSSCG00000016773,ENSSSCG00000016777,ENSSSCG00000007312,ENSSSCG00000003702,ENSSSCG00000030108,ENSSSCG00000007559,ENSSSCG00000014628,ENSSSCG00000013735,ENSSSCG00000030581,ENSSSCG00000025229,ENSSSCG00000012853,ENSSSCG00000007967,…	CEBPD,--,ZBTB16,PML,--,PEG3,--,ZNF274,JUN,ZNF282,ZNF212,SCAND1,GATA6,--,MAFK,APBB1,--,VGLL4,--,IRF7,ZNF213,WT1,FOXK1,HCFC1,SOX9,ETV7,--
GO:0005166	0.0404935	1	1	3	neurotrophin p75 receptor binding	MF	ENSSSCG00000003998	ZNF274
GO:0007389	0.0405973	1	3	40	pattern specification process	BP	ENSSSCG00000007501,ENSSSCG00000029189,ENSSSCG00000023329	BMP7,DCHS1,APC2
GO:0042571	0.040878	1	1	4	immunoglobulin complex, circulating	CC	ENSSSCG00000021006	--
GO:0002090	0.0409098	1	1	3	regulation of receptor internalization	BP	ENSSSCG00000005177	SH3GL2
GO:0032649	0.0409946	1	1	3	regulation of interferon-gamma production	BP	ENSSSCG00000027982	ISG15
GO:0018171	0.0412189	1	1	2	peptidyl-cysteine oxidation	BP	ENSSSCG00000010682	PRDX3
GO:0030578	0.0414139	1	1	3	PML body organization	BP	ENSSSCG00000001912	PML
GO:0060072	0.0414544	1	1	3	large conductance calcium-activated potassium channel activity	MF	ENSSSCG00000010325	KCNMA1
GO:0060271	0.041502	1	3	42	cilium morphogenesis	BP	ENSSSCG00000010023,ENSSSCG00000024500,ENSSSCG00000008020	PLA2G3,--,IFT140
GO:0003192	0.0417476	1	1	1	mitral valve formation	BP	ENSSSCG00000029189	DCHS1
GO:0071307	0.0418337	1	1	2	cellular response to vitamin K	BP	ENSSSCG00000009565	GAS6
GO:0051539	0.0418809	1	2	21	4 iron, 4 sulfur cluster binding	MF	ENSSSCG00000008648,ENSSSCG00000008014	RSAD2,NUBP2
GO:0043043	0.0421832	1	1	2	peptide biosynthetic process	BP	ENSSSCG00000014169	PCSK1
GO:0089720	0.0422182	1	1	2	caspase binding	MF	ENSSSCG00000029328	--
GO:0000448	0.0423482	1	1	2	cleavage in ITS2 between 5.8S rRNA and LSU-rRNA of tricistronic rRNA transcript (SSU-rRNA, 5.8S rRNA, LSU-rRNA)	BP	ENSSSCG00000005920	BOP1
GO:0006235	0.0425904	1	1	2	dTTP biosynthetic process	BP	ENSSSCG00000008647	CMPK2
GO:0050873	0.04266	1	2	22	brown fat cell differentiation	BP	ENSSSCG00000004859,ENSSSCG00000017137	ZNF516,METRNL
GO:0045415	0.0429957	1	1	3	negative regulation of interleukin-8 biosynthetic process	BP	ENSSSCG00000005437	KLF4
GO:0015248	0.0430239	1	1	3	sterol transporter activity	MF	ENSSSCG00000003853	--
GO:0015440	0.0430682	1	1	3	peptide-transporting ATPase activity	MF	ENSSSCG00000025593	--
GO:0072133	0.0432835	1	1	3	metanephric mesenchyme morphogenesis	BP	ENSSSCG00000007501	BMP7
GO:0051247	0.0433217	1	1	2	positive regulation of protein metabolic process	BP	ENSSSCG00000005437	KLF4
GO:0006342	0.0434704	1	2	32	chromatin silencing	BP	ENSSSCG00000022537,ENSSSCG00000023045	--,BAHCC1
GO:0032607	0.0436632	1	1	2	interferon-alpha production	BP	ENSSSCG00000012853	IRF7
GO:0048133	0.0437253	1	1	3	male germ-line stem cell asymmetric division	BP	ENSSSCG00000030095	ZBTB16
GO:0001540	0.0442057	1	2	19	beta-amyloid binding	MF	ENSSSCG00000003088,ENSSSCG00000014628	APOE,APBB1
GO:0002481	0.0443906	1	1	3	antigen processing and presentation of exogenous protein antigen via MHC class Ib, TAP-dependent	BP	ENSSSCG00000025593	--
GO:0002485	0.0443906	1	1	3	antigen processing and presentation of endogenous peptide antigen via MHC class I via ER pathway, TAP-dependent	BP	ENSSSCG00000025593	--
GO:0002489	0.0443906	1	1	3	antigen processing and presentation of endogenous peptide antigen via MHC class Ib via ER pathway, TAP-dependent	BP	ENSSSCG00000025593	--
GO:0002591	0.0443906	1	1	3	positive regulation of antigen processing and presentation of peptide antigen via MHC class I	BP	ENSSSCG00000025593	--
GO:0008296	0.0444959	1	1	3	3'-5'-exodeoxyribonuclease activity	MF	ENSSSCG00000003216	POLD1
GO:0032911	0.0445057	1	1	3	negative regulation of transforming growth factor beta1 production	BP	ENSSSCG00000003702	GATA6
GO:0048646	0.0445454	1	2	20	anatomical structure formation involved in morphogenesis	BP	ENSSSCG00000003702,ENSSSCG00000007501	GATA6,BMP7
GO:0070857	0.0449343	1	1	3	regulation of bile acid biosynthetic process	BP	ENSSSCG00000014047	FGFR4
GO:2000757	0.0450992	1	1	3	negative regulation of peptidyl-lysine acetylation	BP	ENSSSCG00000026755	KLF15
GO:2001238	0.0455018	1	2	23	positive regulation of extrinsic apoptotic signaling pathway	BP	ENSSSCG00000001912,ENSSSCG00000029328	PML,--
GO:0031965	0.0456547	1	5	103	nuclear membrane	CC	ENSSSCG00000000033,ENSSSCG00000001912,ENSSSCG00000012077,ENSSSCG00000024018,ENSSSCG00000017143	TSPO,PML,MX1,SLC16A3,CEP131
GO:0048248	0.0457105	1	1	4	CXCR3 chemokine receptor binding	MF	ENSSSCG00000008977	CXCL10
GO:1902995	0.046024	1	1	2	positive regulation of phospholipid efflux	BP	ENSSSCG00000003088	APOE
GO:0019064	0.0462484	1	1	3	fusion of virus membrane with host plasma membrane	BP	ENSSSCG00000009565	GAS6
GO:0019787	0.046282	1	1	3	ubiquitin-like protein transferase activity	MF	ENSSSCG00000023379	UBE2L6
GO:0060485	0.0463287	1	1	3	mesenchyme development	BP	ENSSSCG00000007501	BMP7
GO:0050713	0.0463528	1	1	3	negative regulation of interleukin-1 beta secretion	BP	ENSSSCG00000001912	PML
GO:0034384	0.0464241	1	1	4	high-density lipoprotein particle clearance	BP	ENSSSCG00000003088	APOE
GO:0002819	0.0466521	1	1	3	regulation of adaptive immune response	BP	ENSSSCG00000012853	IRF7
GO:0019464	0.0472561	1	1	4	glycine decarboxylation via glycine cleavage system	BP	ENSSSCG00000005199	--
GO:0010811	0.0472776	1	2	22	positive regulation of cell-substrate adhesion	BP	ENSSSCG00000016848,ENSSSCG00000008557	EGFLAM,EMILIN1
GO:0000987	0.0472851	1	2	21	core promoter proximal region sequence-specific DNA binding	MF	ENSSSCG00000004859,ENSSSCG00000005437	ZNF516,KLF4
GO:0005581	0.0474024	1	3	44	collagen trimer	CC	ENSSSCG00000005751,ENSSSCG00000008557,ENSSSCG00000005487	COL5A1,EMILIN1,--
GO:0005833	0.0474415	1	1	6	hemoglobin complex	CC	ENSSSCG00000007978	--
GO:0003725	0.0474453	1	3	42	double-stranded RNA binding	MF	ENSSSCG00000030408,ENSSSCG00000017416,ENSSSCG00000009881	DDX58,DHX58,OAS2
GO:0001774	0.0476014	1	1	4	microglial cell activation	BP	ENSSSCG00000030839	JUN
GO:0071277	0.0478337	1	2	20	cellular response to calcium ion	BP	ENSSSCG00000030839,ENSSSCG00000013735	JUN,--
GO:0006694	0.0479058	1	2	22	steroid biosynthetic process	BP	ENSSSCG00000021767,ENSSSCG00000003853	--,--
GO:0032964	0.0480316	1	1	3	collagen biosynthetic process	BP	ENSSSCG00000005751	COL5A1
GO:0004966	0.0482299	1	1	4	galanin receptor activity	MF	ENSSSCG00000017189	GALR2
GO:0003872	0.0482301	1	1	3	6-phosphofructokinase activity	MF	ENSSSCG00000028197	PFKL
GO:0061615	0.0482301	1	1	3	glycolytic process through fructose-6-phosphate	BP	ENSSSCG00000028197	PFKL
GO:1900165	0.0483091	1	1	3	negative regulation of interleukin-6 secretion	BP	ENSSSCG00000009565	GAS6
GO:0070449	0.0484599	1	1	3	elongin complex	CC	ENSSSCG00000008061	TCEB2
GO:0042158	0.0484644	1	1	4	lipoprotein biosynthetic process	BP	ENSSSCG00000003088	APOE
GO:0060393	0.0488524	1	1	3	regulation of pathway-restricted SMAD protein phosphorylation	BP	ENSSSCG00000007501	BMP7
GO:0009597	0.0489408	1	1	2	detection of virus	BP	ENSSSCG00000030408	DDX58
GO:0001502	0.0489562	1	2	20	cartilage condensation	BP	ENSSSCG00000008041,ENSSSCG00000017251	PKD1,SOX9
GO:0001961	0.0490286	1	1	3	positive regulation of cytokine-mediated signaling pathway	BP	ENSSSCG00000009565	GAS6
GO:0019900	0.0491725	1	3	49	kinase binding	MF	ENSSSCG00000028102,ENSSSCG00000028197,ENSSSCG00000010682	TOLLIP,PFKL,PRDX3
GO:0006531	0.0491772	1	1	3	aspartate metabolic process	BP	ENSSSCG00000010537	GOT1
GO:0070492	0.0492068	1	1	3	oligosaccharide binding	MF	ENSSSCG00000006288	SELP
GO:0071499	0.0493296	1	1	3	cellular response to laminar fluid shear stress	BP	ENSSSCG00000005437	KLF4
GO:0030816	0.0493423	1	1	4	positive regulation of cAMP metabolic process	BP	ENSSSCG00000008977	CXCL10
GO:1903225	0.049485	1	1	2	negative regulation of endodermal cell differentiation	BP	ENSSSCG00000005751	COL5A1
GO:0050689	0.0495684	1	1	3	negative regulation of defense response to virus by host	BP	ENSSSCG00000010453	IFIT1
GO:0060385	0.0496201	1	1	3	axonogenesis involved in innervation	BP	ENSSSCG00000006464	NTRK1
GO:0036303	0.0497228	1	1	1	lymph vessel morphogenesis	BP	ENSSSCG00000008041	PKD1
GO:0072237	0.0497228	1	1	1	metanephric proximal tubule development	BP	ENSSSCG00000008041	PKD1
GO:0072287	0.0497228	1	1	1	metanephric distal tubule morphogenesis	BP	ENSSSCG00000008041	PKD1
GO:0030388	0.0498288	1	1	3	fructose 1,6-bisphosphate metabolic process	BP	ENSSSCG00000028197	PFKL
GO:0033687	0.0498337	1	1	3	osteoblast proliferation	BP	ENSSSCG00000013735	--
GO:0042406	0.0499201	1	1	3	extrinsic component of endoplasmic reticulum membrane	CC	ENSSSCG00000001912	PML
GO:0016155	0.0503756	1	1	2	formyltetrahydrofolate dehydrogenase activity	MF	ENSSSCG00000030626	ALDH1L1
GO:0019079	0.0503918	1	1	5	viral genome replication	BP	ENSSSCG00000009565	GAS6
GO:0035426	0.0504544	1	1	3	extracellular matrix-cell signaling	BP	ENSSSCG00000012885	LRP5
GO:0016763	0.0504799	1	1	4	transferase activity, transferring pentosyl groups	MF	ENSSSCG00000027454	--
GO:0060947	0.0505414	1	1	3	cardiac vascular smooth muscle cell differentiation	BP	ENSSSCG00000003702	GATA6
GO:0008238	0.0506015	1	1	3	exopeptidase activity	MF	ENSSSCG00000011723	MME
GO:0043615	0.0507319	1	1	4	astrocyte cell migration	BP	ENSSSCG00000024712	APCDD1
GO:0009041	0.0512397	1	1	3	uridylate kinase activity	MF	ENSSSCG00000008647	CMPK2
GO:0015197	0.0512967	1	1	4	peptide transporter activity	MF	ENSSSCG00000025593	--
GO:0005030	0.051468	1	1	4	neurotrophin receptor activity	MF	ENSSSCG00000006464	NTRK1
GO:0008152	0.0514724	1	26	1133	metabolic process	BP	ENSSSCG00000029335,ENSSSCG00000010099,ENSSSCG00000002626,ENSSSCG00000012077,ENSSSCG00000017146,ENSSSCG00000012076,ENSSSCG00000017148,ENSSSCG00000008648,ENSSSCG00000027868,ENSSSCG00000030408,ENSSSCG00000029945,ENSSSCG00000017416,ENSSSCG00000006919,ENSSSCG00000030801,ENSSSCG00000022379,ENSSSCG00000001006,ENSSSCG00000006982,ENSSSCG00000030626,ENSSSCG00000003853,ENSSSCG00000029502,ENSSSCG00000010879,…	--,--,--,MX1,RNF213,MX2,--,RSAD2,--,DDX58,--,DHX58,GBP4,GBP6,--,TUBB2B,ZDHHC2,ALDH1L1,--,--,KIF26B,--,--,PARP14,--,CHPF
GO:0031265	0.0516637	1	1	3	CD95 death-inducing signaling complex	CC	ENSSSCG00000029328	--
GO:0090191	0.0518844	1	1	4	negative regulation of branching involved in ureteric bud morphogenesis	BP	ENSSSCG00000003832	TACSTD2
GO:0031077	0.0520145	1	1	3	post-embryonic camera-type eye development	BP	ENSSSCG00000005437	KLF4
GO:0039536	0.0522671	1	1	3	negative regulation of RIG-I signaling pathway	BP	ENSSSCG00000017416	DHX58
GO:0061673	0.0523153	1	1	2	mitotic spindle astral microtubule	CC	ENSSSCG00000014802	NUMA1
GO:0035108	0.0524334	1	2	17	limb morphogenesis	BP	ENSSSCG00000008020,ENSSSCG00000012885	IFT140,LRP5
GO:0032469	0.0524383	1	1	4	endoplasmic reticulum calcium ion homeostasis	BP	ENSSSCG00000001912	PML
GO:0072193	0.0525038	1	1	3	ureter smooth muscle cell differentiation	BP	ENSSSCG00000017251	SOX9
GO:0072137	0.0525568	1	1	2	condensed mesenchymal cell proliferation	BP	ENSSSCG00000029189	DCHS1
GO:0060033	0.0526138	1	1	3	anatomical structure regression	BP	ENSSSCG00000012885	LRP5
GO:0015918	0.0529895	1	1	3	sterol transport	BP	ENSSSCG00000003853	--
GO:0005019	0.0531056	1	1	3	platelet-derived growth factor beta-receptor activity	MF	ENSSSCG00000031039	CH242-138G12.1
GO:0030133	0.0531178	1	2	24	transport vesicle	CC	ENSSSCG00000002669,ENSSSCG00000014047	CRISPLD2,FGFR4
GO:0019706	0.0531764	1	2	24	protein-cysteine S-palmitoyltransferase activity	MF	ENSSSCG00000006982,ENSSSCG00000012947	ZDHHC2,--
GO:0006334	0.0532116	1	3	71	nucleosome assembly	BP	ENSSSCG00000029773,ENSSSCG00000027435,ENSSSCG00000017251	HIST1H4L,HIST1H3E,SOX9
GO:0019934	0.053318	1	1	3	cGMP-mediated signaling	BP	ENSSSCG00000003088	APOE
GO:0060350	0.0537593	1	1	3	endochondral bone morphogenesis	BP	ENSSSCG00000017251	SOX9
GO:0048487	0.0539175	1	2	19	beta-tubulin binding	MF	ENSSSCG00000008697,ENSSSCG00000017136	HTT,TBCD
GO:0009058	0.0539717	1	3	51	biosynthetic process	BP	ENSSSCG00000029945,ENSSSCG00000030626,ENSSSCG00000010537	--,ALDH1L1,GOT1
GO:0006287	0.0541092	1	1	3	base-excision repair, gap-filling	BP	ENSSSCG00000003216	POLD1
GO:0044794	0.0543265	1	1	4	positive regulation by host of viral process	BP	ENSSSCG00000003088	APOE
GO:0008379	0.0543361	1	1	4	thioredoxin peroxidase activity	MF	ENSSSCG00000010682	PRDX3
GO:0034362	0.0543368	1	1	4	low-density lipoprotein particle	CC	ENSSSCG00000003088	APOE
GO:0003310	0.0545051	1	1	4	pancreatic A cell differentiation	BP	ENSSSCG00000003702	GATA6
GO:0035989	0.0545649	1	1	2	tendon development	BP	ENSSSCG00000005751	COL5A1
GO:1902430	0.0546169	1	1	3	negative regulation of beta-amyloid formation	BP	ENSSSCG00000003088	APOE
GO:0005007	0.0546509	1	1	5	fibroblast growth factor-activated receptor activity	MF	ENSSSCG00000014047	FGFR4
GO:1901203	0.0547651	1	1	3	positive regulation of extracellular matrix assembly	BP	ENSSSCG00000017251	SOX9
GO:0030620	0.054799	1	1	3	U2 snRNA binding	MF	ENSSSCG00000024867	ISG20
GO:0016605	0.0549311	1	3	43	PML body	CC	ENSSSCG00000030095,ENSSSCG00000001912,ENSSSCG00000024867	ZBTB16,PML,ISG20
GO:0007528	0.0553265	1	2	20	neuromuscular junction development	BP	ENSSSCG00000011521,ENSSSCG00000003342	PDZRN3,DVL1
GO:1904263	0.0555889	1	1	4	positive regulation of TORC1 signaling	BP	ENSSSCG00000008022	TELO2
GO:0050851	0.055671	1	1	5	antigen receptor-mediated signaling pathway	BP	ENSSSCG00000028878	BCAR1
GO:0035694	0.0556989	1	1	4	mitochondrial protein catabolic process	BP	ENSSSCG00000008834	--
GO:0030170	0.0559113	1	3	51	pyridoxal phosphate binding	MF	ENSSSCG00000008948,ENSSSCG00000029945,ENSSSCG00000010537	ALB,--,GOT1
GO:0008107	0.0560417	1	1	4	galactoside 2-alpha-L-fucosyltransferase activity	MF	ENSSSCG00000003145	FUT2
GO:0045165	0.0562278	1	3	54	cell fate commitment	BP	ENSSSCG00000001912,ENSSSCG00000003702,ENSSSCG00000017251	PML,GATA6,SOX9
GO:0071936	0.0562281	1	1	2	coreceptor activity involved in Wnt signaling pathway	MF	ENSSSCG00000012885	LRP5
GO:0015643	0.0563353	1	1	4	toxic substance binding	MF	ENSSSCG00000008948	ALB
GO:0071504	0.0563947	1	1	3	cellular response to heparin	BP	ENSSSCG00000017251	SOX9
GO:0071773	0.0564794	1	2	21	cellular response to BMP stimulus	BP	ENSSSCG00000003702,ENSSSCG00000007501	GATA6,BMP7
GO:0045541	0.0565015	1	1	4	negative regulation of cholesterol biosynthetic process	BP	ENSSSCG00000003088	APOE
GO:0070212	0.0566275	1	1	3	protein poly-ADP-ribosylation	BP	ENSSSCG00000005926	PARP10
GO:0046922	0.0566624	1	1	3	peptide-O-fucosyltransferase activity	MF	ENSSSCG00000026654	--
GO:0045444	0.056689	1	3	47	fat cell differentiation	BP	ENSSSCG00000006276,ENSSSCG00000005437,ENSSSCG00000017137	CEBPD,KLF4,METRNL
GO:0006297	0.0567572	1	1	3	nucleotide-excision repair, DNA gap filling	BP	ENSSSCG00000003216	POLD1
GO:2000020	0.0567638	1	1	4	positive regulation of male gonad development	BP	ENSSSCG00000017251	SOX9
GO:0030424	0.0570214	1	5	109	axon	CC	ENSSSCG00000026688,ENSSSCG00000008697,ENSSSCG00000011723,ENSSSCG00000006464,ENSSSCG00000003342	--,HTT,MME,NTRK1,DVL1
GO:0032021	0.0571612	1	1	3	NELF complex	CC	ENSSSCG00000008681	NELFA
GO:0038096	0.0575158	1	1	5	Fc-gamma receptor signaling pathway involved in phagocytosis	BP	ENSSSCG00000021006	--
GO:0008310	0.057587	1	1	4	single-stranded DNA 3'-5' exodeoxyribonuclease activity	MF	ENSSSCG00000024867	ISG20
GO:0060018	0.0578276	1	1	3	astrocyte fate commitment	BP	ENSSSCG00000017251	SOX9
GO:0061005	0.0578735	1	1	2	cell differentiation involved in kidney development	BP	ENSSSCG00000023653	GLIS2
GO:1901509	0.0580064	1	1	3	regulation of endothelial tube morphogenesis	BP	ENSSSCG00000008977	CXCL10
GO:0070384	0.0581484	1	1	3	Harderian gland development	BP	ENSSSCG00000017251	SOX9
GO:0039529	0.058398	1	1	3	RIG-I signaling pathway	BP	ENSSSCG00000030408	DDX58
GO:0002455	0.0585966	1	1	4	humoral immune response mediated by circulating immunoglobulin	BP	ENSSSCG00000021006	--
GO:0006950	0.0587517	1	2	24	response to stress	BP	ENSSSCG00000029722,ENSSSCG00000009585	--,GADD45G
GO:0003273	0.0587554	1	1	2	cell migration involved in endocardial cushion formation	BP	ENSSSCG00000029189	DCHS1
GO:0043234	0.059242	1	8	232	protein complex	CC	ENSSSCG00000010099,ENSSSCG00000029773,ENSSSCG00000022506,ENSSSCG00000008697,ENSSSCG00000008948,ENSSSCG00000001006,ENSSSCG00000028022,ENSSSCG00000017251	--,HIST1H4L,--,HTT,ALB,TUBB2B,COL6A2,SOX9
GO:0006107	0.0592685	1	1	4	oxaloacetate metabolic process	BP	ENSSSCG00000010537	GOT1
GO:0010544	0.06028	1	1	5	negative regulation of platelet activation	BP	ENSSSCG00000003088	APOE
GO:0019233	0.0603565	1	2	26	sensory perception of pain	BP	ENSSSCG00000011723,ENSSSCG00000015913	MME,SCN9A
GO:0048754	0.0603883	1	2	21	branching morphogenesis of an epithelial tube	BP	ENSSSCG00000008041,ENSSSCG00000007501	PKD1,BMP7
GO:0060136	0.060661	1	1	4	embryonic process involved in female pregnancy	BP	ENSSSCG00000013735	--
GO:0090336	0.0607163	1	1	4	positive regulation of brown fat cell differentiation	BP	ENSSSCG00000017137	METRNL
GO:0072001	0.0613608	1	2	19	renal system development	BP	ENSSSCG00000008041,ENSSSCG00000008020	PKD1,IFT140
GO:2000510	0.0614303	1	1	4	positive regulation of dendritic cell chemotaxis	BP	ENSSSCG00000009565	GAS6
GO:0007271	0.0616721	1	2	25	synaptic transmission, cholinergic	BP	ENSSSCG00000017188,ENSSSCG00000029890	ZACN,--
GO:0051891	0.0620741	1	1	4	positive regulation of cardioblast differentiation	BP	ENSSSCG00000003702	GATA6
GO:0046813	0.0621184	1	1	4	receptor-mediated virion attachment to host cell	BP	ENSSSCG00000009565	GAS6
GO:0072655	0.062215	1	1	4	establishment of protein localization to mitochondrion	BP	ENSSSCG00000000033	TSPO
GO:0072656	0.062215	1	1	4	maintenance of protein location in mitochondrion	BP	ENSSSCG00000000033	TSPO
GO:0097485	0.0623013	1	1	3	neuron projection guidance	BP	ENSSSCG00000023483	PLXNA3
GO:0001786	0.0625238	1	2	23	phosphatidylserine binding	MF	ENSSSCG00000017062,ENSSSCG00000009565	--,GAS6
GO:1902262	0.0626617	1	1	4	apoptotic process involved in patterning of blood vessels	BP	ENSSSCG00000012885	LRP5
GO:0031507	0.0628389	1	1	3	heterochromatin assembly	BP	ENSSSCG00000023045	BAHCC1
GO:0061304	0.0628509	1	1	3	retinal blood vessel morphogenesis	BP	ENSSSCG00000012885	LRP5
GO:0060228	0.0630322	1	1	5	phosphatidylcholine-sterol O-acyltransferase activator activity	MF	ENSSSCG00000003088	APOE
GO:2000553	0.0630931	1	1	4	positive regulation of T-helper 2 cell cytokine production	BP	ENSSSCG00000008648	RSAD2
GO:0007182	0.0634754	1	1	4	common-partner SMAD protein phosphorylation	BP	ENSSSCG00000001912	PML
GO:0033554	0.0634827	1	1	5	cellular response to stress	BP	ENSSSCG00000008834	--
GO:2000138	0.0635242	1	1	3	positive regulation of cell proliferation involved in heart morphogenesis	BP	ENSSSCG00000017251	SOX9
GO:0048406	0.0636008	1	1	4	nerve growth factor binding	MF	ENSSSCG00000006464	NTRK1
GO:0006958	0.0636336	1	1	6	complement activation, classical pathway	BP	ENSSSCG00000021006	--
GO:0001505	0.0636549	1	1	3	regulation of neurotransmitter levels	BP	ENSSSCG00000003342	DVL1
GO:0048012	0.0638256	1	1	4	hepatocyte growth factor receptor signaling pathway	BP	ENSSSCG00000028878	BCAR1
GO:2000573	0.0639569	1	1	5	positive regulation of DNA biosynthetic process	BP	ENSSSCG00000014047	FGFR4
GO:2000741	0.0641725	1	1	3	positive regulation of mesenchymal stem cell differentiation	BP	ENSSSCG00000017251	SOX9
GO:0070935	0.0642988	1	1	5	3'-UTR-mediated mRNA stabilization	BP	ENSSSCG00000014322	HNRNPA0
GO:0048539	0.0646226	1	1	4	bone marrow development	BP	ENSSSCG00000012885	LRP5
GO:0018108	0.0651111	1	4	83	peptidyl-tyrosine phosphorylation	BP	ENSSSCG00000030560,ENSSSCG00000021886,ENSSSCG00000006464,ENSSSCG00000014047	--,--,NTRK1,FGFR4
GO:0060687	0.0655734	1	1	4	regulation of branching involved in prostate gland morphogenesis	BP	ENSSSCG00000007501	BMP7
GO:2000738	0.0656664	1	1	5	positive regulation of stem cell differentiation	BP	ENSSSCG00000003832	TACSTD2
GO:0015108	0.0659002	1	1	4	chloride transmembrane transporter activity	MF	ENSSSCG00000022956	--
GO:0035166	0.0659305	1	1	4	post-embryonic hemopoiesis	BP	ENSSSCG00000005437	KLF4
GO:0001658	0.0661606	1	2	26	branching involved in ureteric bud morphogenesis	BP	ENSSSCG00000029189,ENSSSCG00000017251	DCHS1,SOX9
GO:0050688	0.0662929	1	1	4	regulation of defense response to virus	BP	ENSSSCG00000030548	--
GO:0002385	0.0663163	1	1	4	mucosal immune response	BP	ENSSSCG00000021006	--
GO:0030916	0.0663658	1	1	4	otic vesicle formation	BP	ENSSSCG00000017251	SOX9
GO:0033130	0.0664635	1	1	5	acetylcholine receptor binding	MF	ENSSSCG00000029890	--
GO:0010634	0.0667783	1	2	23	positive regulation of epithelial cell migration	BP	ENSSSCG00000030839,ENSSSCG00000017251	JUN,SOX9
GO:0048730	0.0669454	1	1	4	epidermis morphogenesis	BP	ENSSSCG00000005437	KLF4
GO:0003713	0.0669827	1	5	127	transcription coactivator activity	MF	ENSSSCG00000030839,ENSSSCG00000007312,ENSSSCG00000013735,ENSSSCG00000000075,ENSSSCG00000012793	JUN,SCAND1,--,MKL1,HCFC1
GO:0002133	0.067037	1	1	2	polycystin complex	CC	ENSSSCG00000008041	PKD1
GO:0004127	0.0678047	1	1	4	cytidylate kinase activity	MF	ENSSSCG00000008647	CMPK2
GO:0030828	0.0679704	1	1	5	positive regulation of cGMP biosynthetic process	BP	ENSSSCG00000003088	APOE
GO:0043491	0.068065	1	2	25	protein kinase B signaling	BP	ENSSSCG00000009565,ENSSSCG00000017251	GAS6,SOX9
GO:0031264	0.0681475	1	1	4	death-inducing signaling complex	CC	ENSSSCG00000029328	--
GO:0030858	0.0681641	1	1	4	positive regulation of epithelial cell differentiation	BP	ENSSSCG00000017251	SOX9
GO:0050853	0.0683759	1	2	27	B cell receptor signaling pathway	BP	ENSSSCG00000021006,ENSSSCG00000028878	--,BCAR1
GO:0008134	0.0683789	1	7	199	transcription factor binding	MF	ENSSSCG00000008697,ENSSSCG00000030839,ENSSSCG00000005437,ENSSSCG00000003702,ENSSSCG00000014628,ENSSSCG00000013735,ENSSSCG00000009761	HTT,JUN,KLF4,GATA6,APBB1,--,--
GO:0015833	0.0684019	1	1	5	peptide transport	BP	ENSSSCG00000025593	--
GO:0051128	0.0686274	1	1	3	regulation of cellular component organization	BP	ENSSSCG00000005751	COL5A1
GO:0036010	0.0686651	1	1	5	protein localization to endosome	BP	ENSSSCG00000028102	TOLLIP
GO:0061138	0.0692639	1	1	4	morphogenesis of a branching epithelium	BP	ENSSSCG00000017251	SOX9
GO:0060008	0.069464	1	1	5	Sertoli cell differentiation	BP	ENSSSCG00000017251	SOX9
GO:0035735	0.0695089	1	1	4	intraciliary transport involved in cilium morphogenesis	BP	ENSSSCG00000017143	CEP131
GO:0070545	0.0695255	1	1	4	PeBoW complex	CC	ENSSSCG00000005920	BOP1
GO:0097114	0.0696159	1	1	3	NMDA glutamate receptor clustering	BP	ENSSSCG00000003088	APOE
GO:0006707	0.069646	1	1	5	cholesterol catabolic process	BP	ENSSSCG00000003088	APOE
GO:0048679	0.0697001	1	1	4	regulation of axon regeneration	BP	ENSSSCG00000005437	KLF4
GO:0033673	0.0697837	1	1	5	negative regulation of kinase activity	BP	ENSSSCG00000010682	PRDX3
GO:0035987	0.0699031	1	2	22	endodermal cell differentiation	BP	ENSSSCG00000022506,ENSSSCG00000003702	--,GATA6
GO:0071813	0.0699748	1	1	4	lipoprotein particle binding	MF	ENSSSCG00000003088	APOE
GO:0042541	0.0700608	1	1	5	hemoglobin biosynthetic process	BP	ENSSSCG00000020771	INHA
GO:0034372	0.0703451	1	1	5	very-low-density lipoprotein particle remodeling	BP	ENSSSCG00000003088	APOE
GO:0007220	0.070478	1	1	6	Notch receptor processing	BP	ENSSSCG00000026688	--
GO:0048156	0.0705048	1	1	4	tau protein binding	MF	ENSSSCG00000003088	APOE
GO:0034374	0.0705333	1	1	5	low-density lipoprotein particle remodeling	BP	ENSSSCG00000003088	APOE
GO:0060534	0.0705943	1	1	4	trachea cartilage development	BP	ENSSSCG00000017251	SOX9
GO:0006461	0.0709307	1	2	24	protein complex assembly	BP	ENSSSCG00000001912,ENSSSCG00000017251	PML,SOX9
GO:0000461	0.0709341	1	1	8	endonucleolytic cleavage to generate mature 3'-end of SSU-rRNA from (SSU-rRNA, 5.8S rRNA, LSU-rRNA)	BP	ENSSSCG00000021825	RPS21
GO:0003309	0.0711774	1	1	5	type B pancreatic cell differentiation	BP	ENSSSCG00000003702	GATA6
GO:0003727	0.0712764	1	2	26	single-stranded RNA binding	MF	ENSSSCG00000030408,ENSSSCG00000017416	DDX58,DHX58
GO:0060512	0.0715177	1	1	4	prostate gland morphogenesis	BP	ENSSSCG00000017251	SOX9
GO:0060686	0.0715635	1	1	4	negative regulation of prostatic bud formation	BP	ENSSSCG00000007501	BMP7
GO:0031466	0.0717626	1	1	5	Cul5-RING ubiquitin ligase complex	CC	ENSSSCG00000008061	TCEB2
GO:0022007	0.0719005	1	1	4	convergent extension involved in neural plate elongation	BP	ENSSSCG00000003342	DVL1
GO:0003179	0.0722971	1	1	3	heart valve morphogenesis	BP	ENSSSCG00000017251	SOX9
GO:0034116	0.072429	1	1	5	positive regulation of heterotypic cell-cell adhesion	BP	ENSSSCG00000007501	BMP7
GO:0019800	0.0725812	1	1	5	peptide cross-linking via chondroitin 4-sulfate glycosaminoglycan	BP	ENSSSCG00000016848	EGFLAM
GO:0031102	0.073018	1	1	5	neuron projection regeneration	BP	ENSSSCG00000003088	APOE
GO:0035455	0.0730396	1	1	4	response to interferon-alpha	BP	ENSSSCG00000012076	MX2
GO:0005344	0.0731625	1	1	8	oxygen transporter activity	MF	ENSSSCG00000007978	--
GO:0015671	0.0731625	1	1	8	oxygen transport	BP	ENSSSCG00000007978	--
GO:0036066	0.073169	1	1	4	protein O-linked fucosylation	BP	ENSSSCG00000026654	--
GO:0045600	0.0732442	1	2	29	positive regulation of fat cell differentiation	BP	ENSSSCG00000030095,ENSSSCG00000012885	ZBTB16,LRP5
GO:0006644	0.073346	1	2	31	phospholipid metabolic process	BP	ENSSSCG00000010023,ENSSSCG00000003702	PLA2G3,GATA6
GO:0000738	0.0733716	1	1	5	DNA catabolic process, exonucleolytic	BP	ENSSSCG00000024867	ISG20
GO:0050810	0.073523	1	1	5	regulation of steroid biosynthetic process	BP	ENSSSCG00000013021	SF1
GO:0032480	0.0735417	1	1	4	negative regulation of type I interferon production	BP	ENSSSCG00000017416	DHX58
GO:0048678	0.0735653	1	1	7	response to axon injury	BP	ENSSSCG00000027868	--
GO:0000109	0.0735943	1	1	4	nucleotide-excision repair complex	CC	ENSSSCG00000003216	POLD1
GO:2000059	0.0739984	1	1	5	negative regulation of protein ubiquitination involved in ubiquitin-dependent protein catabolic process	BP	ENSSSCG00000001912	PML
GO:0005588	0.0742371	1	1	3	collagen type V trimer	CC	ENSSSCG00000005751	COL5A1
GO:0005604	0.0743136	1	3	44	basement membrane	CC	ENSSSCG00000016848,ENSSSCG00000005710,ENSSSCG00000005751	EGFLAM,LAMC3,COL5A1
GO:0009303	0.0746589	1	1	7	rRNA transcription	BP	ENSSSCG00000021810	--
GO:0050808	0.0746741	1	2	25	synapse organization	BP	ENSSSCG00000015399,ENSSSCG00000003342	SEMA3E,DVL1
GO:0034511	0.0751446	1	1	5	U3 snoRNA binding	MF	ENSSSCG00000024867	ISG20
GO:0003950	0.0751844	1	2	23	NAD+ ADP-ribosyltransferase activity	MF	ENSSSCG00000005926,ENSSSCG00000011874	PARP10,PARP14
GO:0070374	0.0752302	1	4	111	positive regulation of ERK1 and ERK2 cascade	BP	ENSSSCG00000030839,ENSSSCG00000006464,ENSSSCG00000014047,ENSSSCG00000009565	JUN,NTRK1,FGFR4,GAS6
GO:0005506	0.0754853	1	5	147	iron ion binding	MF	ENSSSCG00000021406,ENSSSCG00000029606,ENSSSCG00000008857,ENSSSCG00000007978,ENSSSCG00000025273	--,AOX1,MSMO1,--,CYP11A1
GO:0015276	0.0755672	1	1	5	ligand-gated ion channel activity	MF	ENSSSCG00000017188	ZACN
GO:0060009	0.0757148	1	1	5	Sertoli cell development	BP	ENSSSCG00000017251	SOX9
GO:0017147	0.0761681	1	2	23	Wnt-protein binding	MF	ENSSSCG00000024712,ENSSSCG00000012885	APCDD1,LRP5
GO:0030334	0.0762883	1	3	55	regulation of cell migration	BP	ENSSSCG00000027868,ENSSSCG00000030408,ENSSSCG00000023483	--,DDX58,PLXNA3
GO:0003682	0.0767288	1	9	286	chromatin binding	MF	ENSSSCG00000008681,ENSSSCG00000021810,ENSSSCG00000030839,ENSSSCG00000003216,ENSSSCG00000003702,ENSSSCG00000014628,ENSSSCG00000012793,ENSSSCG00000017251,ENSSSCG00000023045	NELFA,--,JUN,POLD1,GATA6,APBB1,HCFC1,SOX9,BAHCC1
GO:0071493	0.0768733	1	1	5	cellular response to UV-B	BP	ENSSSCG00000011723	MME
GO:0042627	0.0771943	1	1	7	chylomicron	CC	ENSSSCG00000003088	APOE
GO:1900245	0.0773309	1	1	3	positive regulation of MDA-5 signaling pathway	BP	ENSSSCG00000017416	DHX58
GO:0042744	0.0773618	1	1	5	hydrogen peroxide catabolic process	BP	ENSSSCG00000010682	PRDX3
GO:0006612	0.0781406	1	2	30	protein targeting to membrane	BP	ENSSSCG00000006982,ENSSSCG00000012947	ZDHHC2,--
GO:2001054	0.0781844	1	1	5	negative regulation of mesenchymal cell apoptotic process	BP	ENSSSCG00000017251	SOX9
GO:1902237	0.078267	1	1	5	positive regulation of endoplasmic reticulum stress-induced intrinsic apoptotic signaling pathway	BP	ENSSSCG00000008144	NCK2
GO:0030619	0.0785902	1	1	5	U1 snRNA binding	MF	ENSSSCG00000024867	ISG20
GO:0005739	0.0786694	1	23	1102	mitochondrion	CC	ENSSSCG00000026631,ENSSSCG00000021406,ENSSSCG00000021767,ENSSSCG00000029335,ENSSSCG00000010452,ENSSSCG00000000033,ENSSSCG00000008675,ENSSSCG00000005759,ENSSSCG00000008648,ENSSSCG00000008647,ENSSSCG00000025525,ENSSSCG00000024500,ENSSSCG00000030626,ENSSSCG00000017638,ENSSSCG00000005199,ENSSSCG00000010682,ENSSSCG00000025273,ENSSSCG00000008017,ENSSSCG00000004679,ENSSSCG00000010861,ENSSSCG00000012885,…	SLC25A6,--,--,--,IFIT3,TSPO,LETM1,MRPS2,RSAD2,CMPK2,--,--,ALDH1L1,TSPOAP1,--,PRDX3,CYP11A1,NME3,SORD,COQ8A,LRP5,HCFC1,FAM213A
GO:0060486	0.0787038	1	1	4	Clara cell differentiation	BP	ENSSSCG00000003702	GATA6
GO:0051920	0.079106	1	1	6	peroxiredoxin activity	MF	ENSSSCG00000010682	PRDX3
GO:0010735	0.0791264	1	1	4	positive regulation of transcription via serum response element binding	BP	ENSSSCG00000000075	MKL1
GO:0046850	0.0792347	1	1	5	regulation of bone remodeling	BP	ENSSSCG00000012885	LRP5
GO:0010873	0.0793651	1	1	6	positive regulation of cholesterol esterification	BP	ENSSSCG00000003088	APOE
GO:0032439	0.0794198	1	1	4	endosome localization	BP	ENSSSCG00000012077	MX1
GO:0060575	0.0798402	1	1	5	intestinal epithelial cell differentiation	BP	ENSSSCG00000003702	GATA6
GO:0072562	0.0798575	1	3	64	blood microparticle	CC	ENSSSCG00000021006,ENSSSCG00000008948,ENSSSCG00000003088	--,ALB,APOE
GO:0032825	0.0799418	1	1	5	positive regulation of natural killer cell differentiation	BP	ENSSSCG00000009565	GAS6
GO:0050871	0.0803077	1	1	7	positive regulation of B cell activation	BP	ENSSSCG00000021006	--
GO:0030971	0.0805863	1	2	27	receptor tyrosine kinase binding	MF	ENSSSCG00000022936,ENSSSCG00000009565	FIZ1,GAS6
GO:0031587	0.0807311	1	1	3	positive regulation of inositol 1,4,5-trisphosphate-sensitive calcium-release channel activity	BP	ENSSSCG00000008697	HTT
GO:1990090	0.0808833	1	1	6	cellular response to nerve growth factor stimulus	BP	ENSSSCG00000006464	NTRK1
GO:0045839	0.080891	1	1	5	negative regulation of mitotic nuclear division	BP	ENSSSCG00000007501	BMP7
GO:0032813	0.0810831	1	1	6	tumor necrosis factor receptor superfamily binding	MF	ENSSSCG00000029328	--
GO:0010952	0.0812449	1	1	5	positive regulation of peptidase activity	BP	ENSSSCG00000000010	--
GO:0070213	0.0812532	1	1	4	protein auto-ADP-ribosylation	BP	ENSSSCG00000005926	PARP10
GO:0097113	0.081533	1	1	5	AMPA glutamate receptor clustering	BP	ENSSSCG00000003088	APOE
GO:0003170	0.081672	1	1	5	heart valve development	BP	ENSSSCG00000017251	SOX9
GO:0007288	0.0816739	1	1	5	sperm axoneme assembly	BP	ENSSSCG00000010023	PLA2G3
GO:0006163	0.0818857	1	1	8	purine nucleotide metabolic process	BP	ENSSSCG00000008017	NME3
GO:0042981	0.0822691	1	6	192	regulation of apoptotic process	BP	ENSSSCG00000014825,ENSSSCG00000029328,ENSSSCG00000008017,ENSSSCG00000007501,ENSSSCG00000012885,ENSSSCG00000020771	RELT,--,NME3,BMP7,LRP5,INHA
GO:0043565	0.0824823	1	12	479	sequence-specific DNA binding	MF	ENSSSCG00000006276,ENSSSCG00000003998,ENSSSCG00000004859,ENSSSCG00000030839,ENSSSCG00000005437,ENSSSCG00000003702,ENSSSCG00000007559,ENSSSCG00000013735,ENSSSCG00000007967,ENSSSCG00000007576,ENSSSCG00000017251,ENSSSCG00000001561	CEBPD,ZNF274,ZNF516,JUN,KLF4,GATA6,MAFK,--,ZNF213,FOXK1,SOX9,ETV7
GO:0021637	0.0825347	1	1	4	trigeminal nerve structural organization	BP	ENSSSCG00000023483	PLXNA3
GO:0006898	0.0826014	1	3	63	receptor-mediated endocytosis	BP	ENSSSCG00000021006,ENSSSCG00000003088,ENSSSCG00000002981	--,APOE,DMBT1
GO:0019372	0.082629	1	1	5	lipoxygenase pathway	BP	ENSSSCG00000010023	PLA2G3
GO:0005525	0.0831589	1	9	343	GTP binding	MF	ENSSSCG00000010099,ENSSSCG00000016451,ENSSSCG00000025610,ENSSSCG00000012077,ENSSSCG00000012076,ENSSSCG00000006919,ENSSSCG00000030801,ENSSSCG00000001006,ENSSSCG00000014618	--,GIMAP1,AGAP3,MX1,MX2,GBP4,GBP6,TUBB2B,--
GO:0072177	0.0834877	1	1	3	mesonephric duct development	BP	ENSSSCG00000008041	PKD1
GO:0006977	0.0836221	1	1	5	DNA damage response, signal transduction by p53 class mediator resulting in cell cycle arrest	BP	ENSSSCG00000001912	PML
GO:0031514	0.0836344	1	2	29	motile cilium	CC	ENSSSCG00000004679,ENSSSCG00000002633	SORD,--
GO:1903912	0.0837345	1	1	5	negative regulation of endoplasmic reticulum stress-induced eIF2 alpha phosphorylation	BP	ENSSSCG00000008144	NCK2
GO:1903660	0.083826	1	1	6	negative regulation of complement-dependent cytotoxicity	BP	ENSSSCG00000010123	CLDN5
GO:0021860	0.0839856	1	1	5	pyramidal neuron development	BP	ENSSSCG00000023483	PLXNA3
GO:0030850	0.0841114	1	1	5	prostate gland development	BP	ENSSSCG00000017251	SOX9
GO:0097191	0.0847094	1	2	33	extrinsic apoptotic signaling pathway	BP	ENSSSCG00000001912,ENSSSCG00000029328	PML,--
GO:0010818	0.0848898	1	1	7	T cell chemotaxis	BP	ENSSSCG00000008977	CXCL10
GO:0048592	0.0851393	1	1	3	eye morphogenesis	BP	ENSSSCG00000005751	COL5A1
GO:0009404	0.0851569	1	1	5	toxin metabolic process	BP	ENSSSCG00000015268	FMO1
GO:0035791	0.0856285	1	1	5	platelet-derived growth factor receptor-beta signaling pathway	BP	ENSSSCG00000031039	CH242-138G12.1
GO:0034987	0.0856581	1	1	7	immunoglobulin receptor binding	MF	ENSSSCG00000021006	--
GO:0019825	0.0865913	1	2	35	oxygen binding	MF	ENSSSCG00000008948,ENSSSCG00000007978	ALB,--
GO:2000146	0.0866859	1	1	6	negative regulation of cell motility	BP	ENSSSCG00000003832	TACSTD2
GO:0042493	0.086699	1	3	64	response to drug	BP	ENSSSCG00000030839,ENSSSCG00000003702,ENSSSCG00000013735	JUN,GATA6,--
GO:0070326	0.0867518	1	1	4	very-low-density lipoprotein particle receptor binding	MF	ENSSSCG00000003088	APOE
GO:0016740	0.0868467	1	15	576	transferase activity	MF	ENSSSCG00000030560,ENSSSCG00000022734,ENSSSCG00000002626,ENSSSCG00000028197,ENSSSCG00000029945,ENSSSCG00000006982,ENSSSCG00000003145,ENSSSCG00000006464,ENSSSCG00000003216,ENSSSCG00000002737,ENSSSCG00000014047,ENSSSCG00000008017,ENSSSCG00000010537,ENSSSCG00000012947,ENSSSCG00000009881	--,--,--,PFKL,--,ZDHHC2,FUT2,NTRK1,POLD1,CHST4,FGFR4,NME3,GOT1,--,OAS2
GO:0042297	0.086852	1	1	3	vocal learning	BP	ENSSSCG00000008697	HTT
GO:0035019	0.0873783	1	2	26	somatic stem cell population maintenance	BP	ENSSSCG00000012885,ENSSSCG00000017251	LRP5,SOX9
GO:0043303	0.0879999	1	1	5	mast cell degranulation	BP	ENSSSCG00000010023	PLA2G3
GO:0016742	0.088128	1	1	4	hydroxymethyl-, formyl- and related transferase activity	MF	ENSSSCG00000030626	ALDH1L1
GO:0043293	0.0883873	1	1	5	apoptosome	CC	ENSSSCG00000029463	--
GO:0043367	0.0888044	1	1	5	CD4-positive, alpha-beta T cell differentiation	BP	ENSSSCG00000008648	RSAD2
GO:1900745	0.0888547	1	1	6	positive regulation of p38MAPK cascade	BP	ENSSSCG00000009585	GADD45G
GO:0042987	0.0889401	1	1	6	amyloid precursor protein catabolic process	BP	ENSSSCG00000026688	--
GO:0045505	0.0893489	1	1	2	dynein intermediate chain binding	MF	ENSSSCG00000008697	HTT
GO:0043522	0.0898975	1	1	6	leucine zipper domain binding	MF	ENSSSCG00000000075	MKL1
GO:0060029	0.0903451	1	1	5	convergent extension involved in organogenesis	BP	ENSSSCG00000003342	DVL1
GO:0001517	0.0904853	1	1	6	N-acetylglucosamine 6-O-sulfotransferase activity	MF	ENSSSCG00000002737	CHST4
GO:0038180	0.0906799	1	1	5	nerve growth factor signaling pathway	BP	ENSSSCG00000006464	NTRK1
GO:0031045	0.0908651	1	1	4	dense core granule	CC	ENSSSCG00000023032	SCG2
GO:0060603	0.0913599	1	1	4	mammary gland duct morphogenesis	BP	ENSSSCG00000012885	LRP5
GO:0005504	0.0914625	1	1	6	fatty acid binding	MF	ENSSSCG00000008948	ALB
GO:0006183	0.0919242	1	1	9	GTP biosynthetic process	BP	ENSSSCG00000008017	NME3
GO:0006228	0.0919242	1	1	9	UTP biosynthetic process	BP	ENSSSCG00000008017	NME3
GO:0072006	0.0919723	1	1	5	nephron development	BP	ENSSSCG00000029189	DCHS1
GO:0003183	0.0921478	1	1	5	mitral valve morphogenesis	BP	ENSSSCG00000029189	DCHS1
GO:0097527	0.0922018	1	1	6	necroptotic signaling pathway	BP	ENSSSCG00000029328	--
GO:0043394	0.0922198	1	1	5	proteoglycan binding	MF	ENSSSCG00000005751	COL5A1
GO:0070461	0.0922242	1	1	6	SAGA-type complex	CC	ENSSSCG00000012793	HCFC1
GO:0048843	0.0924792	1	2	32	negative regulation of axon extension involved in axon guidance	BP	ENSSSCG00000015399,ENSSSCG00000023483	SEMA3E,PLXNA3
GO:0048008	0.0926193	1	2	25	platelet-derived growth factor receptor signaling pathway	BP	ENSSSCG00000031039,ENSSSCG00000028878	CH242-138G12.1,BCAR1
GO:0051258	0.092641	1	2	33	protein polymerization	BP	ENSSSCG00000010099,ENSSSCG00000001006	--,TUBB2B
GO:0071340	0.0927053	1	1	5	skeletal muscle acetylcholine-gated channel clustering	BP	ENSSSCG00000003342	DVL1
GO:0008150	0.0930767	1	2	38	biological_process	BP	ENSSSCG00000015636,ENSSSCG00000011643	VSTM2A,--
GO:1900006	0.0931011	1	1	6	positive regulation of dendrite development	BP	ENSSSCG00000007501	BMP7
GO:0042490	0.0933231	1	1	5	mechanoreceptor differentiation	BP	ENSSSCG00000006464	NTRK1
GO:0031659	0.0934656	1	1	4	positive regulation of cyclin-dependent protein serine/threonine kinase activity involved in G1/S transition of mitotic cell cycle	BP	ENSSSCG00000008041	PKD1
GO:0043407	0.0936458	1	2	30	negative regulation of MAP kinase activity	BP	ENSSSCG00000003088,ENSSSCG00000007501	APOE,BMP7
GO:0007263	0.0939008	1	1	5	nitric oxide mediated signal transduction	BP	ENSSSCG00000003088	APOE
GO:0006220	0.0939252	1	1	8	pyrimidine nucleotide metabolic process	BP	ENSSSCG00000008017	NME3
GO:0031397	0.0941145	1	2	32	negative regulation of protein ubiquitination	BP	ENSSSCG00000027982,ENSSSCG00000000033	ISG15,TSPO
GO:0072218	0.0943505	1	1	4	metanephric ascending thin limb development	BP	ENSSSCG00000008041	PKD1
GO:0048762	0.0951143	1	1	7	mesenchymal cell differentiation	BP	ENSSSCG00000007501	BMP7
GO:0044306	0.0957074	1	1	7	neuron projection terminus	CC	ENSSSCG00000011723	MME
GO:0032725	0.0957514	1	1	6	positive regulation of granulocyte macrophage colony-stimulating factor production	BP	ENSSSCG00000030408	DDX58
GO:0070848	0.0959061	1	1	5	response to growth factor	BP	ENSSSCG00000003702	GATA6
GO:0043950	0.0965998	1	1	6	positive regulation of cAMP-mediated signaling	BP	ENSSSCG00000008977	CXCL10
GO:0034405	0.0966627	1	1	4	response to fluid shear stress	BP	ENSSSCG00000008041	PKD1
GO:0002687	0.0967245	1	1	7	positive regulation of leukocyte migration	BP	ENSSSCG00000006288	SELP
GO:0006002	0.0969782	1	1	6	fructose 6-phosphate metabolic process	BP	ENSSSCG00000028197	PFKL
GO:0060510	0.0971453	1	1	5	Type II pneumocyte differentiation	BP	ENSSSCG00000003702	GATA6
GO:0042058	0.0977999	1	1	6	regulation of epidermal growth factor receptor signaling pathway	BP	ENSSSCG00000023362	RHBDF2
GO:0008236	0.0978659	1	4	115	serine-type peptidase activity	MF	ENSSSCG00000008723,ENSSSCG00000013442,ENSSSCG00000014169,ENSSSCG00000013418	HTRA3,ABHD17A,PCSK1,CFD
GO:0031214	0.0979343	1	1	7	biomineral tissue development	BP	ENSSSCG00000009219	IBSP
GO:0035326	0.0984292	1	1	6	enhancer binding	MF	ENSSSCG00000017251	SOX9
GO:0032270	0.0985001	1	1	6	positive regulation of cellular protein metabolic process	BP	ENSSSCG00000005437	KLF4
GO:0040007	0.0987578	1	2	35	growth	BP	ENSSSCG00000027638,ENSSSCG00000007501	--,BMP7
GO:0061700	0.0988977	1	1	7	GATOR2 complex	CC	ENSSSCG00000008007	WDR24
GO:0030903	0.0991809	1	1	6	notochord development	BP	ENSSSCG00000017251	SOX9
GO:0097342	0.0993961	1	1	6	ripoptosome	CC	ENSSSCG00000029328	--
GO:0010468	0.0995926	1	5	141	regulation of gene expression	BP	ENSSSCG00000026755,ENSSSCG00000003326,ENSSSCG00000003088,ENSSSCG00000003702,ENSSSCG00000002443	KLF15,PEG3,APOE,GATA6,TC2N
GO:0019885	0.0996813	1	1	7	antigen processing and presentation of endogenous peptide antigen via MHC class I	BP	ENSSSCG00000025593	--
GO:0048266	0.0997196	1	1	6	behavioral response to pain	BP	ENSSSCG00000015913	SCN9A
GO:0031115	0.0999878	1	1	7	negative regulation of microtubule polymerization	BP	ENSSSCG00000017136	TBCD
GO:0061299	0.100163	1	1	6	retina vasculature morphogenesis in camera-type eye	BP	ENSSSCG00000012885	LRP5
GO:0072205	0.10057	1	1	4	metanephric collecting duct development	BP	ENSSSCG00000008041	PKD1
GO:0006910	0.100725	1	1	8	phagocytosis, recognition	BP	ENSSSCG00000021006	--
GO:0008385	0.100828	1	1	7	IkappaB kinase complex	CC	ENSSSCG00000010682	PRDX3
GO:0007157	0.101264	1	2	34	heterophilic cell-cell adhesion via plasma membrane cell adhesion molecules	BP	ENSSSCG00000006288,ENSSSCG00000029189	SELP,DCHS1
GO:0006082	0.101434	1	1	6	organic acid metabolic process	BP	ENSSSCG00000015268	FMO1
GO:0048645	0.101579	1	1	6	organ formation	BP	ENSSSCG00000003702	GATA6
GO:0071260	0.10272	1	2	31	cellular response to mechanical stimulus	BP	ENSSSCG00000029328,ENSSSCG00000017251	--,SOX9
GO:0031386	0.10272	1	1	8	protein tag	MF	ENSSSCG00000027982	ISG15
GO:0034380	0.103124	1	1	7	high-density lipoprotein particle assembly	BP	ENSSSCG00000003088	APOE
GO:0031953	0.103383	1	1	6	negative regulation of protein autophosphorylation	BP	ENSSSCG00000030839	JUN
GO:0010629	0.103571	1	4	105	negative regulation of gene expression	BP	ENSSSCG00000010322,ENSSSCG00000005437,ENSSSCG00000005926,ENSSSCG00000017251	ZNF503,KLF4,PARP10,SOX9
GO:2000270	0.103968	1	1	5	negative regulation of fibroblast apoptotic process	BP	ENSSSCG00000009565	GAS6
GO:0060445	0.104311	1	1	7	branching involved in salivary gland morphogenesis	BP	ENSSSCG00000007501	BMP7
GO:0072164	0.105052	1	1	5	mesonephric tubule development	BP	ENSSSCG00000008041	PKD1
GO:0045732	0.105234	1	2	32	positive regulation of protein catabolic process	BP	ENSSSCG00000023329,ENSSSCG00000017251	APC2,SOX9
GO:0021532	0.105337	1	1	5	neural tube patterning	BP	ENSSSCG00000008020	IFT140
GO:0061029	0.105595	1	1	7	eyelid development in camera-type eye	BP	ENSSSCG00000030839	JUN
GO:0005160	0.106049	1	2	35	transforming growth factor beta receptor binding	MF	ENSSSCG00000007501,ENSSSCG00000020771	BMP7,INHA
GO:0060428	0.106496	1	1	5	lung epithelium development	BP	ENSSSCG00000008041	PKD1
GO:0044325	0.107101	1	3	61	ion channel binding	MF	ENSSSCG00000000033,ENSSSCG00000008697,ENSSSCG00000008041	TSPO,HTT,PKD1
GO:0016888	0.107174	1	1	9	endodeoxyribonuclease activity, producing 5'-phosphomonoesters	MF	ENSSSCG00000027285	DNASE1L2
GO:0035877	0.1075	1	1	6	death effector domain binding	MF	ENSSSCG00000029328	--
GO:0038095	0.107861	1	1	9	Fc-epsilon receptor signaling pathway	BP	ENSSSCG00000021006	--
GO:0060134	0.107965	1	1	7	prepulse inhibition	BP	ENSSSCG00000003342	DVL1
GO:0006241	0.108002	1	1	10	CTP biosynthetic process	BP	ENSSSCG00000008017	NME3
GO:0097202	0.108112	1	1	7	activation of cysteine-type endopeptidase activity	BP	ENSSSCG00000029328	--
GO:0060430	0.108396	1	1	6	lung saccule development	BP	ENSSSCG00000003702	GATA6
GO:0019902	0.108714	1	2	29	phosphatase binding	MF	ENSSSCG00000005761,ENSSSCG00000010031	PPP1R26,SFI1
GO:0035195	0.10895	1	1	5	gene silencing by miRNA	BP	ENSSSCG00000027734	TNRC6C
GO:0060236	0.109182	1	1	5	regulation of mitotic spindle organization	BP	ENSSSCG00000008041	PKD1
GO:0070700	0.10927	1	1	7	BMP receptor binding	MF	ENSSSCG00000007501	BMP7
GO:0007565	0.109333	1	1	8	female pregnancy	BP	ENSSSCG00000007115	THBD
GO:0071599	0.109635	1	1	6	otic vesicle development	BP	ENSSSCG00000017251	SOX9
GO:0010633	0.109729	1	1	8	negative regulation of epithelial cell migration	BP	ENSSSCG00000003832	TACSTD2
GO:0042118	0.109898	1	1	7	endothelial cell activation	BP	ENSSSCG00000008977	CXCL10
GO:0032183	0.110107	1	1	7	SUMO binding	MF	ENSSSCG00000001912	PML
GO:0043065	0.110163	1	5	147	positive regulation of apoptotic process	BP	ENSSSCG00000030095,ENSSSCG00000029328,ENSSSCG00000014628,ENSSSCG00000009585,ENSSSCG00000007501	ZBTB16,--,APBB1,GADD45G,BMP7
GO:0008635	0.110485	1	1	7	activation of cysteine-type endopeptidase activity involved in apoptotic process by cytochrome c	BP	ENSSSCG00000029463	--
GO:0035313	0.110656	1	1	7	wound healing, spreading of epidermal cells	BP	ENSSSCG00000005751	COL5A1
GO:0006308	0.11082	1	1	10	DNA catabolic process	BP	ENSSSCG00000027285	DNASE1L2
GO:0045651	0.11105	1	1	8	positive regulation of macrophage differentiation	BP	ENSSSCG00000029328	--
GO:0003823	0.111103	1	1	8	antigen binding	MF	ENSSSCG00000021006	--
GO:0048668	0.111373	1	1	6	collateral sprouting	BP	ENSSSCG00000003342	DVL1
GO:0035414	0.111592	1	1	6	negative regulation of catenin import into nucleus	BP	ENSSSCG00000023329	APC2
GO:0045669	0.111608	1	2	35	positive regulation of osteoblast differentiation	BP	ENSSSCG00000006276,ENSSSCG00000007501	CEBPD,BMP7
GO:0006103	0.113047	1	1	7	2-oxoglutarate metabolic process	BP	ENSSSCG00000010537	GOT1
GO:0042407	0.11323	1	1	8	cristae formation	BP	ENSSSCG00000008675	LETM1
GO:0006954	0.113448	1	5	181	inflammatory response	BP	ENSSSCG00000006288,ENSSSCG00000014322,ENSSSCG00000008977,ENSSSCG00000014825,ENSSSCG00000015913	SELP,HNRNPA0,CXCL10,RELT,SCN9A
GO:0034333	0.113615	1	1	7	adherens junction assembly	BP	ENSSSCG00000017136	TBCD
GO:0042311	0.114339	1	1	8	vasodilation	BP	ENSSSCG00000003088	APOE
GO:0019731	0.114513	1	1	11	antibacterial humoral response	BP	ENSSSCG00000022913	SLPI
GO:1900025	0.114534	1	1	8	negative regulation of substrate adhesion-dependent cell spreading	BP	ENSSSCG00000003832	TACSTD2
GO:0044332	0.114878	1	1	5	Wnt signaling pathway involved in dorsal/ventral axis specification	BP	ENSSSCG00000012885	LRP5
GO:0030119	0.11527	1	1	6	AP-type membrane coat adaptor complex	CC	ENSSSCG00000012978	AP5B1
GO:0007213	0.115278	1	1	6	G-protein coupled acetylcholine receptor signaling pathway	BP	ENSSSCG00000022204	--
GO:0001503	0.115343	1	2	38	ossification	BP	ENSSSCG00000009219,ENSSSCG00000017251	IBSP,SOX9
GO:0017046	0.116056	1	1	8	peptide hormone binding	MF	ENSSSCG00000017189	GALR2
GO:0097028	0.116193	1	1	7	dendritic cell differentiation	BP	ENSSSCG00000009565	GAS6
GO:0043922	0.116378	1	1	8	negative regulation by host of viral transcription	BP	ENSSSCG00000030839	JUN
GO:0060548	0.116474	1	2	37	negative regulation of cell death	BP	ENSSSCG00000007501,ENSSSCG00000007379	BMP7,WISP2
GO:0004536	0.116924	1	1	11	deoxyribonuclease activity	MF	ENSSSCG00000027285	DNASE1L2
GO:0003203	0.117019	1	1	8	endocardial cushion morphogenesis	BP	ENSSSCG00000017251	SOX9
GO:0051287	0.117323	1	2	36	NAD binding	MF	ENSSSCG00000029606,ENSSSCG00000004679	AOX1,SORD
GO:0051536	0.117588	1	2	36	iron-sulfur cluster binding	MF	ENSSSCG00000029606,ENSSSCG00000008648	AOX1,RSAD2
GO:0010923	0.117682	1	2	31	negative regulation of phosphatase activity	BP	ENSSSCG00000005761,ENSSSCG00000010031	PPP1R26,SFI1
GO:0034364	0.117868	1	1	12	high-density lipoprotein particle	CC	ENSSSCG00000003088	APOE
GO:0001932	0.118335	1	2	32	regulation of protein phosphorylation	BP	ENSSSCG00000001912,ENSSSCG00000003342	PML,DVL1
GO:0008376	0.118453	1	1	7	acetylgalactosaminyltransferase activity	MF	ENSSSCG00000021610	CHPF
GO:0001077	0.1185	1	5	159	transcriptional activator activity, RNA polymerase II core promoter proximal region sequence-specific binding	MF	ENSSSCG00000006276,ENSSSCG00000023653,ENSSSCG00000005437,ENSSSCG00000013735,ENSSSCG00000017251	CEBPD,GLIS2,KLF4,--,SOX9
GO:0001893	0.118724	1	1	6	maternal placenta development	BP	ENSSSCG00000010682	PRDX3
GO:0005874	0.118811	1	5	130	microtubule	CC	ENSSSCG00000010099,ENSSSCG00000001006,ENSSSCG00000010879,ENSSSCG00000017136,ENSSSCG00000002633	--,TUBB2B,KIF26B,TBCD,--
GO:0046939	0.119252	1	1	8	nucleotide phosphorylation	BP	ENSSSCG00000008647	CMPK2
GO:0032808	0.119408	1	1	6	lacrimal gland development	BP	ENSSSCG00000017251	SOX9
GO:0004499	0.119706	1	1	7	N,N-dimethylaniline monooxygenase activity	MF	ENSSSCG00000015268	FMO1
GO:0050930	0.119813	1	1	8	induction of positive chemotaxis	BP	ENSSSCG00000023032	SCG2
GO:0090051	0.119945	1	1	7	negative regulation of cell migration involved in sprouting angiogenesis	BP	ENSSSCG00000005437	KLF4
GO:0006112	0.120962	1	1	6	energy reserve metabolic process	BP	ENSSSCG00000026943	MRAP2
GO:0048011	0.120998	1	1	7	neurotrophin TRK receptor signaling pathway	BP	ENSSSCG00000006464	NTRK1
GO:0001764	0.121255	1	3	68	neuron migration	BP	ENSSSCG00000001006,ENSSSCG00000000075,ENSSSCG00000009565	TUBB2B,MKL1,GAS6
GO:0000731	0.12126	1	1	7	DNA synthesis involved in DNA repair	BP	ENSSSCG00000003216	POLD1
GO:0034361	0.121417	1	1	10	very-low-density lipoprotein particle	CC	ENSSSCG00000003088	APOE
GO:0035372	0.122334	1	1	7	protein localization to microtubule	BP	ENSSSCG00000003342	DVL1
GO:0050678	0.123156	1	1	7	regulation of epithelial cell proliferation	BP	ENSSSCG00000003832	TACSTD2
GO:0019901	0.12332	1	7	233	protein kinase binding	MF	ENSSSCG00000014322,ENSSSCG00000010682,ENSSSCG00000003702,ENSSSCG00000008041,ENSSSCG00000003342,ENSSSCG00000008022,ENSSSCG00000028878	HNRNPA0,PRDX3,GATA6,PKD1,DVL1,TELO2,BCAR1
GO:0035879	0.123412	1	1	7	plasma membrane lactate transport	BP	ENSSSCG00000024018	SLC16A3
GO:0045724	0.123973	1	1	6	positive regulation of cilium assembly	BP	ENSSSCG00000008697	HTT
GO:0046470	0.124099	1	1	9	phosphatidylcholine metabolic process	BP	ENSSSCG00000010023	PLA2G3
GO:0002021	0.124172	1	1	9	response to dietary excess	BP	ENSSSCG00000003088	APOE
GO:0001649	0.124324	1	3	67	osteoblast differentiation	BP	ENSSSCG00000022506,ENSSSCG00000009219,ENSSSCG00000013735	--,IBSP,--
GO:0005522	0.124782	1	1	4	profilin binding	MF	ENSSSCG00000008697	HTT
GO:0030178	0.124829	1	2	39	negative regulation of Wnt signaling pathway	BP	ENSSSCG00000024712,ENSSSCG00000023329	APCDD1,APC2
GO:0030516	0.124967	1	1	7	regulation of axon extension	BP	ENSSSCG00000003088	APOE
GO:0001085	0.125045	1	2	34	RNA polymerase II transcription factor binding	MF	ENSSSCG00000005437,ENSSSCG00000003702	KLF4,GATA6
GO:0035253	0.125103	1	1	7	ciliary rootlet	CC	ENSSSCG00000026688	--
GO:0051497	0.125168	1	1	8	negative regulation of stress fiber assembly	BP	ENSSSCG00000003832	TACSTD2
GO:0007017	0.125322	1	2	39	microtubule-based process	BP	ENSSSCG00000010099,ENSSSCG00000001006	--,TUBB2B
GO:0036065	0.125498	1	1	9	fucosylation	BP	ENSSSCG00000003145	FUT2
GO:0048018	0.125568	1	1	9	receptor agonist activity	MF	ENSSSCG00000009565	GAS6
GO:0019215	0.125605	1	1	6	intermediate filament binding	MF	ENSSSCG00000017192	EVPL
GO:0042632	0.125629	1	2	35	cholesterol homeostasis	BP	ENSSSCG00000003088,ENSSSCG00000012885	APOE,LRP5
GO:1902017	0.125852	1	1	9	regulation of cilium assembly	BP	ENSSSCG00000008020	IFT140
GO:0051384	0.125949	1	1	8	response to glucocorticoid	BP	ENSSSCG00000010537	GOT1
GO:2001237	0.126042	1	2	33	negative regulation of extrinsic apoptotic signaling pathway	BP	ENSSSCG00000023032,ENSSSCG00000008697	SCG2,HTT
GO:0002474	0.126059	1	1	10	antigen processing and presentation of peptide antigen via MHC class I	BP	ENSSSCG00000024161	SLA-7
GO:0042612	0.126059	1	1	10	MHC class I protein complex	CC	ENSSSCG00000024161	SLA-7
GO:0031616	0.126815	1	1	9	spindle pole centrosome	CC	ENSSSCG00000008014	NUBP2
GO:0048596	0.126941	1	1	8	embryonic camera-type eye morphogenesis	BP	ENSSSCG00000007501	BMP7
GO:0030687	0.126964	1	1	8	preribosome, large subunit precursor	CC	ENSSSCG00000005920	BOP1
GO:0001671	0.126986	1	1	10	ATPase activator activity	MF	ENSSSCG00000029722	--
GO:2000406	0.127177	1	1	11	positive regulation of T cell migration	BP	ENSSSCG00000008977	CXCL10
GO:0031594	0.127402	1	2	32	neuromuscular junction	CC	ENSSSCG00000011521,ENSSSCG00000026688	PDZRN3,--
GO:0042274	0.127481	1	1	13	ribosomal small subunit biogenesis	BP	ENSSSCG00000021825	RPS21
GO:0032391	0.127729	1	2	34	photoreceptor connecting cilium	CC	ENSSSCG00000024500,ENSSSCG00000008020	--,IFT140
GO:0002199	0.128328	1	1	8	zona pellucida receptor complex	CC	ENSSSCG00000030368	HSP70.2
GO:0010862	0.128394	1	2	40	positive regulation of pathway-restricted SMAD protein phosphorylation	BP	ENSSSCG00000007501,ENSSSCG00000020771	BMP7,INHA
GO:0035845	0.12876	1	1	7	photoreceptor cell outer segment organization	BP	ENSSSCG00000008020	IFT140
GO:0042074	0.128785	1	1	6	cell migration involved in gastrulation	BP	ENSSSCG00000012885	LRP5
GO:0000122	0.12885	1	12	482	negative regulation of transcription from RNA polymerase II promoter	BP	ENSSSCG00000030095,ENSSSCG00000021810,ENSSSCG00000003326,ENSSSCG00000030839,ENSSSCG00000023653,ENSSSCG00000005437,ENSSSCG00000003702,ENSSSCG00000013735,ENSSSCG00000009761,ENSSSCG00000008047,ENSSSCG00000017251,ENSSSCG00000001561	ZBTB16,--,PEG3,JUN,GLIS2,KLF4,GATA6,--,--,E4F1,SOX9,ETV7
GO:0005677	0.129139	1	1	6	chromatin silencing complex	CC	ENSSSCG00000023045	BAHCC1
GO:0060174	0.129153	1	1	8	limb bud formation	BP	ENSSSCG00000017251	SOX9
GO:0046889	0.129303	1	1	8	positive regulation of lipid biosynthetic process	BP	ENSSSCG00000003088	APOE
GO:0001675	0.129311	1	1	8	acrosome assembly	BP	ENSSSCG00000010023	PLA2G3
GO:0030206	0.130682	1	1	8	chondroitin sulfate biosynthetic process	BP	ENSSSCG00000021610	CHPF
GO:0019433	0.130801	1	1	9	triglyceride catabolic process	BP	ENSSSCG00000003088	APOE
GO:2000144	0.130944	1	1	7	positive regulation of DNA-templated transcription, initiation	BP	ENSSSCG00000030839	JUN
GO:0043240	0.131472	1	1	8	Fanconi anaemia nuclear complex	CC	ENSSSCG00000029616	FAAP100
GO:0042393	0.13156	1	3	73	histone binding	MF	ENSSSCG00000029773,ENSSSCG00000027435,ENSSSCG00000014628	HIST1H4L,HIST1H3E,APBB1
GO:0043206	0.131564	1	1	6	extracellular fibril organization	BP	ENSSSCG00000005751	COL5A1
GO:2000249	0.132276	1	1	10	regulation of actin cytoskeleton reorganization	BP	ENSSSCG00000015399	SEMA3E
GO:0016486	0.132324	1	1	8	peptide hormone processing	BP	ENSSSCG00000014169	PCSK1
GO:0050919	0.132567	1	2	38	negative chemotaxis	BP	ENSSSCG00000015399,ENSSSCG00000023483	SEMA3E,PLXNA3
GO:0032206	0.132571	1	1	8	positive regulation of telomere maintenance	BP	ENSSSCG00000001912	PML
GO:0060272	0.132905	1	1	9	embryonic skeletal joint morphogenesis	BP	ENSSSCG00000007501	BMP7
GO:0005614	0.133065	1	1	8	interstitial matrix	CC	ENSSSCG00000016848	EGFLAM
GO:0051000	0.133083	1	1	9	positive regulation of nitric-oxide synthase activity	BP	ENSSSCG00000003088	APOE
GO:0090399	0.133087	1	1	7	replicative senescence	BP	ENSSSCG00000011723	MME
GO:0034375	0.133253	1	1	11	high-density lipoprotein particle remodeling	BP	ENSSSCG00000003088	APOE
GO:0016342	0.133349	1	1	8	catenin complex	CC	ENSSSCG00000023329	APC2
GO:0043931	0.133462	1	1	5	ossification involved in bone maturation	BP	ENSSSCG00000029189	DCHS1
GO:0035137	0.133952	1	1	8	hindlimb morphogenesis	BP	ENSSSCG00000030095	ZBTB16
GO:0000185	0.134109	1	1	9	activation of MAPKKK activity	BP	ENSSSCG00000009585	GADD45G
GO:0001228	0.134473	1	3	76	transcriptional activator activity, RNA polymerase II transcription regulatory region sequence-specific binding	MF	ENSSSCG00000003702,ENSSSCG00000007559,ENSSSCG00000017251	GATA6,MAFK,SOX9
GO:0051044	0.135286	1	1	9	positive regulation of membrane protein ectodomain proteolysis	BP	ENSSSCG00000003088	APOE
GO:0005319	0.135442	1	1	11	lipid transporter activity	MF	ENSSSCG00000003088	APOE
GO:0005201	0.135608	1	2	30	extracellular matrix structural constituent	MF	ENSSSCG00000005751,ENSSSCG00000005487	COL5A1,--
GO:1900246	0.135885	1	1	6	positive regulation of RIG-I signaling pathway	BP	ENSSSCG00000017416	DHX58
GO:0045840	0.13604	1	1	11	positive regulation of mitotic nuclear division	BP	ENSSSCG00000012885	LRP5
GO:0008631	0.136343	1	1	9	intrinsic apoptotic signaling pathway in response to oxidative stress	BP	ENSSSCG00000001912	PML
GO:0043524	0.136577	1	3	80	negative regulation of neuron apoptotic process	BP	ENSSSCG00000003088,ENSSSCG00000030839,ENSSSCG00000006464	APOE,JUN,NTRK1
GO:0021612	0.136948	1	1	8	facial nerve structural organization	BP	ENSSSCG00000023483	PLXNA3
GO:0034452	0.137217	1	1	5	dynactin binding	MF	ENSSSCG00000008697	HTT
GO:0097431	0.137234	1	1	6	mitotic spindle pole	CC	ENSSSCG00000014802	NUMA1
GO:0014850	0.137577	1	1	7	response to muscle activity	BP	ENSSSCG00000017137	METRNL
GO:0030317	0.137585	1	2	37	sperm motility	BP	ENSSSCG00000004679,ENSSSCG00000002633	SORD,--
GO:0072372	0.137636	1	2	34	primary cilium	CC	ENSSSCG00000008041,ENSSSCG00000008020	PKD1,IFT140
GO:0033690	0.137659	1	1	8	positive regulation of osteoblast proliferation	BP	ENSSSCG00000012885	LRP5
GO:0008652	0.137671	1	1	9	cellular amino acid biosynthetic process	BP	ENSSSCG00000010537	GOT1
GO:0060042	0.137929	1	1	8	retina morphogenesis in camera-type eye	BP	ENSSSCG00000012885	LRP5
GO:1990138	0.138012	1	1	8	neuron projection extension	BP	ENSSSCG00000023483	PLXNA3
GO:0007435	0.138153	1	1	9	salivary gland morphogenesis	BP	ENSSSCG00000007501	BMP7
GO:0000737	0.138185	1	1	9	DNA catabolic process, endonucleolytic	BP	ENSSSCG00000027285	DNASE1L2
GO:0033327	0.13868	1	1	8	Leydig cell differentiation	BP	ENSSSCG00000013021	SF1
GO:0071539	0.138802	1	1	8	protein localization to centrosome	BP	ENSSSCG00000017143	CEP131
GO:0061178	0.138977	1	1	9	regulation of insulin secretion involved in cellular response to glucose stimulus	BP	ENSSSCG00000012885	LRP5
GO:0043395	0.139075	1	1	10	heparan sulfate proteoglycan binding	MF	ENSSSCG00000016364	GPC1
GO:0031957	0.139191	1	1	10	very long-chain fatty acid-CoA ligase activity	MF	ENSSSCG00000024902	--
GO:0004527	0.139214	1	1	7	exonuclease activity	MF	ENSSSCG00000024867	ISG20
GO:0070688	0.140149	1	1	8	MLL5-L complex	CC	ENSSSCG00000012793	HCFC1
GO:0032088	0.140315	1	2	42	negative regulation of NF-kappaB transcription factor activity	BP	ENSSSCG00000005437,ENSSSCG00000005926	KLF4,PARP10
GO:0060999	0.140692	1	1	8	positive regulation of dendritic spine development	BP	ENSSSCG00000003088	APOE
GO:0097190	0.140754	1	2	41	apoptotic signaling pathway	BP	ENSSSCG00000014825,ENSSSCG00000029328	RELT,--
GO:0071345	0.141339	1	1	9	cellular response to cytokine stimulus	BP	ENSSSCG00000011723	MME
GO:0005783	0.141441	1	12	514	endoplasmic reticulum	CC	ENSSSCG00000026688,ENSSSCG00000008697,ENSSSCG00000008948,ENSSSCG00000015268,ENSSSCG00000008648,ENSSSCG00000003088,ENSSSCG00000000964,ENSSSCG00000008144,ENSSSCG00000006982,ENSSSCG00000014047,ENSSSCG00000026943,ENSSSCG00000012947	--,HTT,ALB,FMO1,RSAD2,APOE,LMF2,NCK2,ZDHHC2,FGFR4,MRAP2,--
GO:0043588	0.141509	1	2	32	skin development	BP	ENSSSCG00000005751,ENSSSCG00000008041	COL5A1,PKD1
GO:0035729	0.141819	1	1	10	cellular response to hepatocyte growth factor stimulus	BP	ENSSSCG00000028878	BCAR1
GO:0001938	0.142215	1	2	38	positive regulation of endothelial cell proliferation	BP	ENSSSCG00000023032,ENSSSCG00000030839	SCG2,JUN
GO:0016594	0.142659	1	1	10	glycine binding	MF	ENSSSCG00000005199	--
GO:0071364	0.142765	1	1	8	cellular response to epidermal growth factor stimulus	BP	ENSSSCG00000017251	SOX9
GO:0001676	0.143135	1	1	10	long-chain fatty acid metabolic process	BP	ENSSSCG00000024902	--
GO:0006744	0.143624	1	1	11	ubiquinone biosynthetic process	BP	ENSSSCG00000010861	COQ8A
GO:0015129	0.144685	1	1	8	lactate transmembrane transporter activity	MF	ENSSSCG00000024018	SLC16A3
GO:0000904	0.144766	1	1	6	cell morphogenesis involved in differentiation	BP	ENSSSCG00000005710	LAMC3
GO:0043995	0.145315	1	1	8	histone acetyltransferase activity (H4-K5 specific)	MF	ENSSSCG00000012793	HCFC1
GO:0043996	0.145315	1	1	8	histone acetyltransferase activity (H4-K8 specific)	MF	ENSSSCG00000012793	HCFC1
GO:0046972	0.145315	1	1	8	histone acetyltransferase activity (H4-K16 specific)	MF	ENSSSCG00000012793	HCFC1
GO:0046827	0.145438	1	1	10	positive regulation of protein export from nucleus	BP	ENSSSCG00000009565	GAS6
GO:0022409	0.145508	1	1	9	positive regulation of cell-cell adhesion	BP	ENSSSCG00000010879	KIF26B
GO:1903827	0.146288	1	1	8	regulation of cellular protein localization	BP	ENSSSCG00000003342	DVL1
GO:0031258	0.146805	1	1	6	lamellipodium membrane	CC	ENSSSCG00000023329	APC2
GO:0048245	0.147901	1	1	15	eosinophil chemotaxis	BP	ENSSSCG00000023032	SCG2
GO:0040037	0.148016	1	1	9	negative regulation of fibroblast growth factor receptor signaling pathway	BP	ENSSSCG00000016364	GPC1
GO:0070403	0.148103	1	1	11	NAD+ binding	MF	ENSSSCG00000021810	--
GO:0030877	0.148104	1	1	9	beta-catenin destruction complex	CC	ENSSSCG00000023329	APC2
GO:0003148	0.148176	1	1	10	outflow tract septum morphogenesis	BP	ENSSSCG00000003702	GATA6
GO:0030857	0.148357	1	1	9	negative regulation of epithelial cell differentiation	BP	ENSSSCG00000017251	SOX9
GO:0042626	0.14841	1	3	76	ATPase activity, coupled to transmembrane movement of substances	MF	ENSSSCG00000029335,ENSSSCG00000025593,ENSSSCG00000001680	--,--,--
GO:1902187	0.148678	1	1	9	negative regulation of viral release from host cell	BP	ENSSSCG00000001912	PML
GO:0030224	0.149062	1	1	9	monocyte differentiation	BP	ENSSSCG00000030839	JUN
GO:0045778	0.150036	1	1	9	positive regulation of ossification	BP	ENSSSCG00000030095	ZBTB16
GO:0050821	0.150344	1	3	83	protein stabilization	BP	ENSSSCG00000003342,ENSSSCG00000012793,ENSSSCG00000008022	DVL1,HCFC1,TELO2
GO:0014068	0.150508	1	2	39	positive regulation of phosphatidylinositol 3-kinase signaling	BP	ENSSSCG00000006288,ENSSSCG00000017251	SELP,SOX9
GO:0034614	0.150521	1	1	10	cellular response to reactive oxygen species	BP	ENSSSCG00000010682	PRDX3
GO:0097320	0.150707	1	1	9	membrane tubulation	BP	ENSSSCG00000013244	--
GO:0035994	0.150728	1	1	7	response to muscle stretch	BP	ENSSSCG00000030839	JUN
GO:0001533	0.150855	1	1	10	cornified envelope	CC	ENSSSCG00000017192	EVPL
GO:0017053	0.151107	1	2	39	transcriptional repressor complex	CC	ENSSSCG00000030095,ENSSSCG00000030839	ZBTB16,JUN
GO:0000463	0.151755	1	1	10	maturation of LSU-rRNA from tricistronic rRNA transcript (SSU-rRNA, 5.8S rRNA, LSU-rRNA)	BP	ENSSSCG00000005920	BOP1
GO:0031931	0.152109	1	1	8	TORC1 complex	CC	ENSSSCG00000008022	TELO2
GO:0000784	0.152146	1	3	78	nuclear chromosome, telomeric region	CC	ENSSSCG00000029773,ENSSSCG00000001912,ENSSSCG00000003216	HIST1H4L,PML,POLD1
GO:0071526	0.152363	1	2	42	semaphorin-plexin signaling pathway	BP	ENSSSCG00000015399,ENSSSCG00000023483	SEMA3E,PLXNA3
GO:0010804	0.152565	1	1	10	negative regulation of tumor necrosis factor-mediated signaling pathway	BP	ENSSSCG00000009565	GAS6
GO:0032403	0.152571	1	3	78	protein complex binding	MF	ENSSSCG00000008144,ENSSSCG00000008022,ENSSSCG00000017143	NCK2,TELO2,CEP131
GO:0072358	0.153029	1	1	9	cardiovascular system development	BP	ENSSSCG00000003088	APOE
GO:0046872	0.153335	1	36	1742	metal ion binding	MF	ENSSSCG00000023704,ENSSSCG00000029606,ENSSSCG00000025717,ENSSSCG00000022963,ENSSSCG00000001912,ENSSSCG00000006114,ENSSSCG00000014303,ENSSSCG00000017146,ENSSSCG00000007978,ENSSSCG00000026755,ENSSSCG00000007823,ENSSSCG00000003326,ENSSSCG00000012352,ENSSSCG00000003998,ENSSSCG00000004859,ENSSSCG00000006982,ENSSSCG00000023653,ENSSSCG00000028056,ENSSSCG00000005437,ENSSSCG00000016773,ENSSSCG00000016777,…	--,AOX1,HIC1,--,PML,CU207250.1,JADE2,RNF213,--,KLF15,--,PEG3,--,ZNF274,ZNF516,ZDHHC2,GLIS2,--,KLF4,ZNF282,ZNF212,SNAI2,CYP11A1,PHRF1,FIZ1,SORD,ZNF524,ZCCHC14,ZNF213,WT1,E4F1,SF1,MIB2,MMP23B,--,--
GO:2000679	0.153522	1	1	12	positive regulation of transcription regulatory region DNA binding	BP	ENSSSCG00000005437	KLF4
GO:0009653	0.153553	1	2	43	anatomical structure morphogenesis	BP	ENSSSCG00000022410,ENSSSCG00000007576	--,FOXK1
GO:0003824	0.153559	1	11	486	catalytic activity	MF	ENSSSCG00000021767,ENSSSCG00000029606,ENSSSCG00000007982,ENSSSCG00000008648,ENSSSCG00000029945,ENSSSCG00000022379,ENSSSCG00000030626,ENSSSCG00000005199,ENSSSCG00000003853,ENSSSCG00000010537,ENSSSCG00000027454	--,AOX1,MPG,RSAD2,--,--,ALDH1L1,--,--,GOT1,--
GO:0000447	0.153611	1	1	13	endonucleolytic cleavage in ITS1 to separate SSU-rRNA from 5.8S rRNA and LSU-rRNA from tricistronic rRNA transcript (SSU-rRNA, 5.8S rRNA, LSU-rRNA)	BP	ENSSSCG00000021825	RPS21
GO:0097157	0.153839	1	1	7	pre-mRNA intronic binding	MF	ENSSSCG00000017251	SOX9
GO:0034244	0.15408	1	1	10	negative regulation of transcription elongation from RNA polymerase II promoter	BP	ENSSSCG00000008681	NELFA
GO:0019363	0.154379	1	1	11	pyridine nucleotide biosynthetic process	BP	ENSSSCG00000027454	--
GO:0006044	0.154426	1	1	11	N-acetylglucosamine metabolic process	BP	ENSSSCG00000002737	CHST4
GO:0017091	0.15508	1	1	12	AU-rich element binding	MF	ENSSSCG00000014322	HNRNPA0
GO:0060674	0.155135	1	1	8	placenta blood vessel development	BP	ENSSSCG00000008041	PKD1
GO:0031462	0.155175	1	1	12	Cul2-RING ubiquitin ligase complex	CC	ENSSSCG00000008061	TCEB2
GO:0014032	0.155414	1	1	10	neural crest cell development	BP	ENSSSCG00000017251	SOX9
GO:0098609	0.155756	1	1	9	cell-cell adhesion	BP	ENSSSCG00000029189	DCHS1
GO:0016614	0.156113	1	1	9	oxidoreductase activity, acting on CH-OH group of donors	MF	ENSSSCG00000029606	AOX1
GO:0010628	0.156244	1	6	212	positive regulation of gene expression	BP	ENSSSCG00000030408,ENSSSCG00000005437,ENSSSCG00000014047,ENSSSCG00000009565,ENSSSCG00000012793,ENSSSCG00000017251	DDX58,KLF4,FGFR4,GAS6,HCFC1,SOX9
GO:0071360	0.15656	1	1	9	cellular response to exogenous dsRNA	BP	ENSSSCG00000010453	IFIT1
GO:0001206	0.157138	1	1	9	transcriptional repressor activity, RNA polymerase II distal enhancer sequence-specific binding	MF	ENSSSCG00000030095	ZBTB16
GO:0046697	0.15715	1	1	11	decidualization	BP	ENSSSCG00000013735	--
GO:0005509	0.157164	1	14	613	calcium ion binding	MF	ENSSSCG00000016848,ENSSSCG00000027173,ENSSSCG00000008675,ENSSSCG00000006114,ENSSSCG00000010023,ENSSSCG00000022204,ENSSSCG00000025146,ENSSSCG00000024823,ENSSSCG00000000010,ENSSSCG00000002443,ENSSSCG00000020963,ENSSSCG00000029189,ENSSSCG00000009565,ENSSSCG00000007115	EGFLAM,--,LETM1,CU207250.1,PLA2G3,--,--,RCN3,--,TC2N,--,DCHS1,GAS6,THBD
GO:0005694	0.157275	1	3	116	chromosome	CC	ENSSSCG00000029773,ENSSSCG00000027435,ENSSSCG00000022537	HIST1H4L,HIST1H3E,--
GO:0045111	0.157524	1	2	36	intermediate filament cytoskeleton	CC	ENSSSCG00000017192,ENSSSCG00000029616	EVPL,FAAP100
GO:0048806	0.158697	1	1	6	genitalia development	BP	ENSSSCG00000008041	PKD1
GO:0045429	0.158714	1	1	12	positive regulation of nitric oxide biosynthetic process	BP	ENSSSCG00000005437	KLF4
GO:0007259	0.159009	1	1	9	JAK-STAT cascade	BP	ENSSSCG00000008041	PKD1
GO:0030296	0.159087	1	1	11	protein tyrosine kinase activator activity	MF	ENSSSCG00000009565	GAS6
GO:0035136	0.160158	1	1	9	forelimb morphogenesis	BP	ENSSSCG00000030095	ZBTB16
GO:0030502	0.16073	1	1	11	negative regulation of bone mineralization	BP	ENSSSCG00000017251	SOX9
GO:0045202	0.160885	1	5	161	synapse	CC	ENSSSCG00000011723,ENSSSCG00000017188,ENSSSCG00000014628,ENSSSCG00000003342,ENSSSCG00000029890	MME,ZACN,APBB1,DVL1,--
GO:0043277	0.161411	1	1	11	apoptotic cell clearance	BP	ENSSSCG00000009565	GAS6
GO:0007179	0.161513	1	2	41	transforming growth factor beta receptor signaling pathway	BP	ENSSSCG00000001912,ENSSSCG00000030839	PML,JUN
GO:0070932	0.162097	1	1	10	histone H3 deacetylation	BP	ENSSSCG00000021810	--
GO:0034341	0.162351	1	1	11	response to interferon-gamma	BP	ENSSSCG00000013664	C19orf66
GO:0042993	0.162915	1	1	9	positive regulation of transcription factor import into nucleus	BP	ENSSSCG00000030408	DDX58
GO:0050768	0.163553	1	1	10	negative regulation of neurogenesis	BP	ENSSSCG00000007501	BMP7
GO:0019531	0.164096	1	1	11	oxalate transmembrane transporter activity	MF	ENSSSCG00000022956	--
GO:0019532	0.164096	1	1	11	oxalate transport	BP	ENSSSCG00000022956	--
GO:0042994	0.164113	1	1	8	cytoplasmic sequestering of transcription factor	BP	ENSSSCG00000008041	PKD1
GO:0004497	0.164116	1	3	89	monooxygenase activity	MF	ENSSSCG00000021406,ENSSSCG00000015268,ENSSSCG00000025273	--,FMO1,CYP11A1
GO:0045638	0.164559	1	1	11	negative regulation of myeloid cell differentiation	BP	ENSSSCG00000030095	ZBTB16
GO:0050901	0.165014	1	1	10	leukocyte tethering or rolling	BP	ENSSSCG00000006288	SELP
GO:1903561	0.165372	1	2	37	extracellular vesicle	CC	ENSSSCG00000003088,ENSSSCG00000028022	APOE,COL6A2
GO:0008092	0.165544	1	2	38	cytoskeletal protein binding	MF	ENSSSCG00000016578,ENSSSCG00000013244	FLNC,--
GO:0010001	0.165636	1	1	12	glial cell differentiation	BP	ENSSSCG00000026755	KLF15
GO:0042326	0.165985	1	1	12	negative regulation of phosphorylation	BP	ENSSSCG00000007501	BMP7
GO:0045861	0.166441	1	1	11	negative regulation of proteolysis	BP	ENSSSCG00000027357	CSTB
GO:0006335	0.166481	1	1	12	DNA replication-dependent nucleosome assembly	BP	ENSSSCG00000029773	HIST1H4L
GO:1900182	0.166526	1	1	12	positive regulation of protein localization to nucleus	BP	ENSSSCG00000023653	GLIS2
GO:0045824	0.16688	1	1	10	negative regulation of innate immune response	BP	ENSSSCG00000017416	DHX58
GO:0005179	0.166958	1	2	74	hormone activity	MF	ENSSSCG00000005216,ENSSSCG00000017137	--,METRNL
GO:0008656	0.167132	1	1	11	cysteine-type endopeptidase activator activity involved in apoptotic process	MF	ENSSSCG00000029463	--
GO:0090179	0.167151	1	1	10	planar cell polarity pathway involved in neural tube closure	BP	ENSSSCG00000003342	DVL1
GO:0045670	0.167678	1	1	8	regulation of osteoclast differentiation	BP	ENSSSCG00000010340	FAM213A
GO:0007194	0.167744	1	1	13	negative regulation of adenylate cyclase activity	BP	ENSSSCG00000017189	GALR2
GO:0034236	0.168264	1	1	9	protein kinase A catalytic subunit binding	MF	ENSSSCG00000017251	SOX9
GO:0051457	0.168529	1	1	10	maintenance of protein location in nucleus	BP	ENSSSCG00000001912	PML
GO:0005229	0.169226	1	1	11	intracellular calcium activated chloride channel activity	MF	ENSSSCG00000007565	TTYH3
GO:0043254	0.169365	1	1	10	regulation of protein complex assembly	BP	ENSSSCG00000012793	HCFC1
GO:0030506	0.169462	1	1	8	ankyrin binding	MF	ENSSSCG00000016578	FLNC
GO:0046718	0.169805	1	1	10	viral entry into host cell	BP	ENSSSCG00000009565	GAS6
GO:0003007	0.169892	1	2	34	heart morphogenesis	BP	ENSSSCG00000005751,ENSSSCG00000029189	COL5A1,DCHS1
GO:0006536	0.17004	1	1	10	glutamate metabolic process	BP	ENSSSCG00000010537	GOT1
GO:0016491	0.170602	1	10	451	oxidoreductase activity	MF	ENSSSCG00000021767,ENSSSCG00000029606,ENSSSCG00000008857,ENSSSCG00000015268,ENSSSCG00000030626,ENSSSCG00000010682,ENSSSCG00000025273,ENSSSCG00000004679,ENSSSCG00000011147,ENSSSCG00000010340	--,AOX1,MSMO1,FMO1,ALDH1L1,PRDX3,CYP11A1,SORD,--,FAM213A
GO:0003924	0.171026	1	6	239	GTPase activity	MF	ENSSSCG00000010099,ENSSSCG00000012077,ENSSSCG00000012076,ENSSSCG00000006919,ENSSSCG00000030801,ENSSSCG00000001006	--,MX1,MX2,GBP4,GBP6,TUBB2B
GO:0005200	0.171396	1	2	44	structural constituent of cytoskeleton	MF	ENSSSCG00000010099,ENSSSCG00000001006	--,TUBB2B
GO:0048384	0.171654	1	1	11	retinoic acid receptor signaling pathway	BP	ENSSSCG00000001912	PML
GO:0030279	0.172523	1	1	10	negative regulation of ossification	BP	ENSSSCG00000017251	SOX9
GO:0000790	0.172567	1	4	134	nuclear chromatin	CC	ENSSSCG00000022537,ENSSSCG00000030839,ENSSSCG00000005437,ENSSSCG00000013735	--,JUN,KLF4,--
GO:0000979	0.172719	1	2	38	RNA polymerase II core promoter sequence-specific DNA binding	MF	ENSSSCG00000003702,ENSSSCG00000012853	GATA6,IRF7
GO:0035721	0.17276	1	1	12	intraciliary retrograde transport	BP	ENSSSCG00000008020	IFT140
GO:0015116	0.172795	1	1	12	sulfate transmembrane transporter activity	MF	ENSSSCG00000022956	--
GO:1902358	0.172795	1	1	12	sulfate transmembrane transport	BP	ENSSSCG00000022956	--
GO:0038191	0.172942	1	1	14	neuropilin binding	MF	ENSSSCG00000015399	SEMA3E
GO:0015758	0.173372	1	1	11	glucose transport	BP	ENSSSCG00000026755	KLF15
GO:0006790	0.173393	1	1	13	sulfur compound metabolic process	BP	ENSSSCG00000002737	CHST4
GO:0010942	0.173581	1	1	12	positive regulation of cell death	BP	ENSSSCG00000007501	BMP7
GO:0000980	0.173865	1	2	44	RNA polymerase II distal enhancer sequence-specific DNA binding	MF	ENSSSCG00000030095,ENSSSCG00000030839	ZBTB16,JUN
GO:0012506	0.174319	1	1	11	vesicle membrane	CC	ENSSSCG00000008144	NCK2
GO:0060213	0.174388	1	1	10	positive regulation of nuclear-transcribed mRNA poly(A) tail shortening	BP	ENSSSCG00000027734	TNRC6C
GO:0009267	0.174783	1	2	42	cellular response to starvation	BP	ENSSSCG00000008948,ENSSSCG00000009565	ALB,GAS6
GO:0010875	0.174798	1	1	10	positive regulation of cholesterol efflux	BP	ENSSSCG00000003088	APOE
GO:0005634	0.174945	1	62	3342	nucleus	CC	ENSSSCG00000026631,ENSSSCG00000006276,ENSSSCG00000010099,ENSSSCG00000026688,ENSSSCG00000022734,ENSSSCG00000029773,ENSSSCG00000030095,ENSSSCG00000027435,ENSSSCG00000022537,ENSSSCG00000008697,ENSSSCG00000001912,ENSSSCG00000014450,ENSSSCG00000008681,ENSSSCG00000008948,ENSSSCG00000026755,ENSSSCG00000007823,ENSSSCG00000003326,ENSSSCG00000003088,ENSSSCG00000000774,ENSSSCG00000003998,ENSSSCG00000004859,…	SLC25A6,CEBPD,--,--,--,HIST1H4L,ZBTB16,HIST1H3E,--,HTT,PML,TCOF1,NELFA,ALB,KLF15,--,PEG3,APOE,USP18,ZNF274,ZNF516,JUN,TACSTD2,BOP1,TUBB2B,GLIS2,POLD1,KLF4,ZNF212,SCAND1,NUBP2,GATA6,--,MAFK,--,C19orf66,ISG20,APBB1,--,PKD1,--,MKL1,IRF7,FIZ1,TC2N,GADD45G,NUMA1,PARP10,ZNF213,GOT1,IER2,WT1,E4F1,ZBP1,FOXK1,HCFC1,DNASE1L2,TELO2,PLXNA3,SOX9,CEP131,ETV7
GO:0045088	0.174979	1	1	11	regulation of innate immune response	BP	ENSSSCG00000017416	DHX58
GO:0001968	0.175238	1	1	12	fibronectin binding	MF	ENSSSCG00000016178	--
GO:0010043	0.17524	1	1	13	response to zinc ion	BP	ENSSSCG00000017188	ZACN
GO:0010761	0.175282	1	1	7	fibroblast migration	BP	ENSSSCG00000001912	PML
GO:0001829	0.175357	1	1	12	trophectodermal cell differentiation	BP	ENSSSCG00000013735	--
GO:0008599	0.175398	1	1	11	protein phosphatase type 1 regulator activity	MF	ENSSSCG00000005901	PPP1R16A
GO:0030193	0.175601	1	1	11	regulation of blood coagulation	BP	ENSSSCG00000002443	TC2N
GO:0032870	0.177927	1	2	48	cellular response to hormone stimulus	BP	ENSSSCG00000030839,ENSSSCG00000013735	JUN,--
GO:0043537	0.179317	1	1	11	negative regulation of blood vessel endothelial cell migration	BP	ENSSSCG00000003088	APOE
GO:0006351	0.180001	1	9	382	transcription, DNA-templated	BP	ENSSSCG00000006276,ENSSSCG00000007823,ENSSSCG00000003326,ENSSSCG00000003998,ENSSSCG00000030839,ENSSSCG00000005437,ENSSSCG00000007559,ENSSSCG00000013735,ENSSSCG00000007967	CEBPD,--,PEG3,ZNF274,JUN,KLF4,MAFK,--,ZNF213
GO:0010976	0.180514	1	2	40	positive regulation of neuron projection development	BP	ENSSSCG00000006464,ENSSSCG00000003342	NTRK1,DVL1
GO:0032006	0.180957	1	1	11	regulation of TOR signaling	BP	ENSSSCG00000008022	TELO2
GO:0008083	0.181592	1	3	114	growth factor activity	MF	ENSSSCG00000027638,ENSSSCG00000007501,ENSSSCG00000020771	--,BMP7,INHA
GO:0043923	0.181597	1	1	10	positive regulation by host of viral transcription	BP	ENSSSCG00000030839	JUN
GO:0015269	0.181848	1	1	12	calcium-activated potassium channel activity	MF	ENSSSCG00000010325	KCNMA1
GO:0042742	0.182016	1	2	62	defense response to bacterium	BP	ENSSSCG00000027982,ENSSSCG00000021006	ISG15,--
GO:2000379	0.182071	1	1	13	positive regulation of reactive oxygen species metabolic process	BP	ENSSSCG00000000033	TSPO
GO:0048188	0.182529	1	1	11	Set1C/COMPASS complex	CC	ENSSSCG00000012793	HCFC1
GO:0001568	0.183315	1	2	40	blood vessel development	BP	ENSSSCG00000005751,ENSSSCG00000008041	COL5A1,PKD1
GO:0014002	0.184576	1	1	13	astrocyte development	BP	ENSSSCG00000005710	LAMC3
GO:0090190	0.184832	1	1	12	positive regulation of branching involved in ureteric bud morphogenesis	BP	ENSSSCG00000017251	SOX9
GO:1902895	0.184964	1	1	12	positive regulation of pri-miRNA transcription from RNA polymerase II promoter	BP	ENSSSCG00000030839	JUN
GO:0071901	0.185236	1	1	12	negative regulation of protein serine/threonine kinase activity	BP	ENSSSCG00000012885	LRP5
GO:0005929	0.185722	1	3	84	cilium	CC	ENSSSCG00000008041,ENSSSCG00000008020,ENSSSCG00000017143	PKD1,IFT140,CEP131
GO:0001190	0.185741	1	1	14	transcriptional activator activity, RNA polymerase II transcription factor binding	MF	ENSSSCG00000005437	KLF4
GO:0002690	0.186409	1	1	16	positive regulation of leukocyte chemotaxis	BP	ENSSSCG00000008977	CXCL10
GO:0030991	0.186572	1	1	13	intraciliary transport particle A	CC	ENSSSCG00000008020	IFT140
GO:0016779	0.187238	1	2	43	nucleotidyltransferase activity	MF	ENSSSCG00000003216,ENSSSCG00000009881	POLD1,OAS2
GO:0097009	0.18751	1	1	11	energy homeostasis	BP	ENSSSCG00000026943	MRAP2
GO:0043691	0.187546	1	1	13	reverse cholesterol transport	BP	ENSSSCG00000003088	APOE
GO:0010951	0.187821	1	3	104	negative regulation of endopeptidase activity	BP	ENSSSCG00000002341,ENSSSCG00000027357,ENSSSCG00000029289	PAPLN,CSTB,CST9L
GO:0043495	0.187943	1	1	12	protein anchor	MF	ENSSSCG00000029890	--
GO:0008271	0.188192	1	1	13	secondary active sulfate transmembrane transporter activity	MF	ENSSSCG00000022956	--
GO:0001953	0.18829	1	1	9	negative regulation of cell-matrix adhesion	BP	ENSSSCG00000015399	SEMA3E
GO:0009435	0.188475	1	1	14	NAD biosynthetic process	BP	ENSSSCG00000027454	--
GO:0031512	0.188533	1	1	7	motile primary cilium	CC	ENSSSCG00000008041	PKD1
GO:0008584	0.189164	1	2	47	male gonad development	BP	ENSSSCG00000003702,ENSSSCG00000017251	GATA6,SOX9
GO:0007010	0.189433	1	3	79	cytoskeleton organization	BP	ENSSSCG00000013244,ENSSSCG00000024500,ENSSSCG00000017251	--,--,SOX9
GO:0005776	0.189594	1	2	41	autophagosome	CC	ENSSSCG00000008697,ENSSSCG00000003326	HTT,PEG3
GO:1900153	0.189833	1	1	12	positive regulation of nuclear-transcribed mRNA catabolic process, deadenylation-dependent decay	BP	ENSSSCG00000027734	TNRC6C
GO:0043984	0.190093	1	1	11	histone H4-K16 acetylation	BP	ENSSSCG00000012793	HCFC1
GO:0031225	0.190577	1	1	15	anchored component of membrane	CC	ENSSSCG00000016364	GPC1
GO:0051087	0.191016	1	2	49	chaperone binding	MF	ENSSSCG00000008948,ENSSSCG00000029722	ALB,--
GO:0010824	0.191076	1	1	13	regulation of centrosome duplication	BP	ENSSSCG00000017143	CEP131
GO:0070064	0.191246	1	1	11	proline-rich region binding	MF	ENSSSCG00000014628	APBB1
GO:0007417	0.191333	1	2	42	central nervous system development	BP	ENSSSCG00000030095,ENSSSCG00000017251	ZBTB16,SOX9
GO:0060071	0.191565	1	1	12	Wnt signaling pathway, planar cell polarity pathway	BP	ENSSSCG00000003342	DVL1
GO:0055114	0.191753	1	13	655	oxidation-reduction process	BP	ENSSSCG00000021406,ENSSSCG00000021767,ENSSSCG00000029606,ENSSSCG00000014433,ENSSSCG00000008857,ENSSSCG00000015268,ENSSSCG00000030626,ENSSSCG00000005199,ENSSSCG00000010682,ENSSSCG00000025273,ENSSSCG00000004679,ENSSSCG00000011147,ENSSSCG00000010340	--,--,AOX1,PCYOX1L,MSMO1,FMO1,ALDH1L1,--,PRDX3,CYP11A1,SORD,--,FAM213A
GO:0001837	0.19197	1	1	11	epithelial to mesenchymal transition	BP	ENSSSCG00000017251	SOX9
GO:0034707	0.191988	1	1	12	chloride channel complex	CC	ENSSSCG00000007565	TTYH3
GO:0006911	0.192025	1	1	14	phagocytosis, engulfment	BP	ENSSSCG00000021006	--
GO:0010842	0.192066	1	1	12	retina layer formation	BP	ENSSSCG00000016620	TSPAN12
GO:0048485	0.19261	1	1	11	sympathetic nervous system development	BP	ENSSSCG00000006464	NTRK1
GO:0017144	0.192824	1	1	12	drug metabolic process	BP	ENSSSCG00000015268	FMO1
GO:0008483	0.193251	1	1	12	transaminase activity	MF	ENSSSCG00000010537	GOT1
GO:0045295	0.193268	1	1	10	gamma-catenin binding	MF	ENSSSCG00000023329	APC2
GO:0042605	0.193523	1	1	14	peptide antigen binding	MF	ENSSSCG00000024161	SLA-7
GO:0003854	0.193838	1	1	13	3-beta-hydroxy-delta5-steroid dehydrogenase activity	MF	ENSSSCG00000021767	--
GO:0042073	0.194002	1	1	13	intraciliary transport	BP	ENSSSCG00000008020	IFT140
GO:0090398	0.194169	1	1	12	cellular senescence	BP	ENSSSCG00000001912	PML
GO:0031932	0.19436	1	1	11	TORC2 complex	CC	ENSSSCG00000008022	TELO2
GO:0050708	0.194786	1	1	14	regulation of protein secretion	BP	ENSSSCG00000023362	RHBDF2
GO:0016055	0.194932	1	3	84	Wnt signaling pathway	BP	ENSSSCG00000003342,ENSSSCG00000012885,ENSSSCG00000023329	DVL1,LRP5,APC2
GO:0006336	0.195037	1	1	13	DNA replication-independent nucleosome assembly	BP	ENSSSCG00000029773	HIST1H4L
GO:0001894	0.195126	1	1	11	tissue homeostasis	BP	ENSSSCG00000017251	SOX9
GO:0033613	0.19528	1	1	10	activating transcription factor binding	MF	ENSSSCG00000004859	ZNF516
GO:0035584	0.197121	1	1	12	calcium-mediated signaling using intracellular calcium source	BP	ENSSSCG00000006288	SELP
GO:0000788	0.197152	1	1	25	nuclear nucleosome	CC	ENSSSCG00000027435	HIST1H3E
GO:0043408	0.197959	1	2	52	regulation of MAPK cascade	BP	ENSSSCG00000007501,ENSSSCG00000020771	BMP7,INHA
GO:0004467	0.198191	1	1	14	long-chain fatty acid-CoA ligase activity	MF	ENSSSCG00000024902	--
GO:0015908	0.198196	1	1	14	fatty acid transport	BP	ENSSSCG00000024902	--
GO:0090026	0.199162	1	1	15	positive regulation of monocyte chemotaxis	BP	ENSSSCG00000008977	CXCL10
GO:0033700	0.19938	1	1	13	phospholipid efflux	BP	ENSSSCG00000003088	APOE
GO:0016525	0.199907	1	2	44	negative regulation of angiogenesis	BP	ENSSSCG00000001912,ENSSSCG00000015399	PML,SEMA3E
GO:0046849	0.199929	1	1	13	bone remodeling	BP	ENSSSCG00000012885	LRP5
GO:0048747	0.200213	1	1	13	muscle fiber development	BP	ENSSSCG00000016578	FLNC
GO:0050750	0.200475	1	1	13	low-density lipoprotein particle receptor binding	MF	ENSSSCG00000003088	APOE
GO:0015106	0.200894	1	1	13	bicarbonate transmembrane transporter activity	MF	ENSSSCG00000022956	--
GO:0016226	0.201098	1	1	16	iron-sulfur cluster assembly	BP	ENSSSCG00000008014	NUBP2
GO:0005856	0.201762	1	5	173	cytoskeleton	CC	ENSSSCG00000010099,ENSSSCG00000005894,ENSSSCG00000017192,ENSSSCG00000001006,ENSSSCG00000007927	--,--,EVPL,TUBB2B,PPL
GO:0034394	0.201957	1	1	13	protein localization to cell surface	BP	ENSSSCG00000026943	MRAP2
GO:0002116	0.202045	1	1	9	semaphorin receptor complex	CC	ENSSSCG00000023483	PLXNA3
GO:0001934	0.20208	1	3	93	positive regulation of protein phosphorylation	BP	ENSSSCG00000022936,ENSSSCG00000003342,ENSSSCG00000017251	FIZ1,DVL1,SOX9
GO:0008272	0.202538	1	1	14	sulfate transport	BP	ENSSSCG00000022956	--
GO:0072661	0.202679	1	1	11	protein targeting to plasma membrane	BP	ENSSSCG00000009565	GAS6
GO:0009925	0.203777	1	1	13	basal plasma membrane	CC	ENSSSCG00000003832	TACSTD2
GO:0006821	0.204898	1	2	48	chloride transport	BP	ENSSSCG00000022956,ENSSSCG00000007565	--,TTYH3
GO:0043198	0.205508	1	1	14	dendritic shaft	CC	ENSSSCG00000026688	--
GO:0048841	0.205652	1	1	10	regulation of axon extension involved in axon guidance	BP	ENSSSCG00000023483	PLXNA3
GO:0051491	0.205785	1	1	14	positive regulation of filopodium assembly	BP	ENSSSCG00000027868	--
GO:0005254	0.20579	1	2	50	chloride channel activity	MF	ENSSSCG00000022956,ENSSSCG00000007565	--,TTYH3
GO:0005790	0.205857	1	1	9	smooth endoplasmic reticulum	CC	ENSSSCG00000026688	--
GO:2001234	0.207201	1	1	15	negative regulation of apoptotic signaling pathway	BP	ENSSSCG00000000075	MKL1
GO:0090102	0.207336	1	1	13	cochlea development	BP	ENSSSCG00000029189	DCHS1
GO:0034198	0.207769	1	1	14	cellular response to amino acid starvation	BP	ENSSSCG00000008007	WDR24
GO:0021785	0.208219	1	1	10	branchiomotor neuron axon guidance	BP	ENSSSCG00000023483	PLXNA3
GO:0060441	0.209113	1	1	13	epithelial tube branching involved in lung morphogenesis	BP	ENSSSCG00000017251	SOX9
GO:0060045	0.211232	1	1	13	positive regulation of cardiac muscle cell proliferation	BP	ENSSSCG00000003702	GATA6
GO:0042056	0.211237	1	1	21	chemoattractant activity	MF	ENSSSCG00000023032	SCG2
GO:0015301	0.211823	1	1	14	anion:anion antiporter activity	MF	ENSSSCG00000022956	--
GO:0070371	0.211865	1	1	15	ERK1 and ERK2 cascade	BP	ENSSSCG00000017251	SOX9
GO:0047496	0.212123	1	1	12	vesicle transport along microtubule	BP	ENSSSCG00000008697	HTT
GO:0031018	0.212478	1	1	16	endocrine pancreas development	BP	ENSSSCG00000017251	SOX9
GO:0043021	0.213613	1	1	16	ribonucleoprotein complex binding	MF	ENSSSCG00000005920	BOP1
GO:0005671	0.214151	1	1	13	Ada2/Gcn5/Ada3 transcription activator complex	CC	ENSSSCG00000012793	HCFC1
GO:0001205	0.214186	1	1	15	transcriptional activator activity, RNA polymerase II distal enhancer sequence-specific binding	MF	ENSSSCG00000012793	HCFC1
GO:0042157	0.214363	1	1	16	lipoprotein metabolic process	BP	ENSSSCG00000003088	APOE
GO:0046579	0.214809	1	1	13	positive regulation of Ras protein signal transduction	BP	ENSSSCG00000006464	NTRK1
GO:0004252	0.215028	1	4	163	serine-type endopeptidase activity	MF	ENSSSCG00000008723,ENSSSCG00000023362,ENSSSCG00000014169,ENSSSCG00000013418	HTRA3,RHBDF2,PCSK1,CFD
GO:0005686	0.215608	1	1	15	U2 snRNP	CC	ENSSSCG00000025044	--
GO:0001530	0.216708	1	1	15	lipopolysaccharide binding	MF	ENSSSCG00000006288	SELP
GO:0034451	0.217239	1	1	12	centriolar satellite	CC	ENSSSCG00000017143	CEP131
GO:0001158	0.220681	1	1	16	enhancer sequence-specific DNA binding	MF	ENSSSCG00000017251	SOX9
GO:0050918	0.220696	1	1	16	positive chemotaxis	BP	ENSSSCG00000023032	SCG2
GO:0005774	0.22084	1	1	15	vacuolar membrane	CC	ENSSSCG00000014433	PCYOX1L
GO:0070830	0.22144	1	1	14	bicellular tight junction assembly	BP	ENSSSCG00000017136	TBCD
GO:0042813	0.221686	1	1	12	Wnt-activated receptor activity	MF	ENSSSCG00000012885	LRP5
GO:0007026	0.221913	1	1	14	negative regulation of microtubule depolymerization	BP	ENSSSCG00000023329	APC2
GO:0048010	0.222779	1	1	14	vascular endothelial growth factor receptor signaling pathway	BP	ENSSSCG00000028878	BCAR1
GO:0045746	0.223198	1	1	15	negative regulation of Notch signaling pathway	BP	ENSSSCG00000007501	BMP7
GO:0008028	0.224365	1	1	15	monocarboxylic acid transmembrane transporter activity	MF	ENSSSCG00000024018	SLC16A3
GO:0015718	0.224365	1	1	15	monocarboxylic acid transport	BP	ENSSSCG00000024018	SLC16A3
GO:0001944	0.22458	1	1	16	vasculature development	BP	ENSSSCG00000012885	LRP5
GO:0001702	0.225025	1	1	13	gastrulation with mouth forming second	BP	ENSSSCG00000012885	LRP5
GO:0043153	0.226379	1	1	16	entrainment of circadian clock by photoperiod	BP	ENSSSCG00000001912	PML
GO:0043981	0.226926	1	1	13	histone H4-K5 acetylation	BP	ENSSSCG00000012793	HCFC1
GO:0043982	0.226926	1	1	13	histone H4-K8 acetylation	BP	ENSSSCG00000012793	HCFC1
GO:0019955	0.227695	1	1	17	cytokine binding	MF	ENSSSCG00000021886	--
GO:0006869	0.228101	1	2	55	lipid transport	BP	ENSSSCG00000029335,ENSSSCG00000003088	--,APOE
GO:0031090	0.229164	1	1	15	organelle membrane	CC	ENSSSCG00000015268	FMO1
GO:0051281	0.229307	1	1	16	positive regulation of release of sequestered calcium ion into cytosol	BP	ENSSSCG00000008977	CXCL10
GO:0006955	0.230724	1	5	257	immune response	BP	ENSSSCG00000008977,ENSSSCG00000014825,ENSSSCG00000024161,ENSSSCG00000022913,ENSSSCG00000009881	CXCL10,RELT,SLA-7,SLPI,OAS2
GO:1902287	0.231113	1	1	11	semaphorin-plexin signaling pathway involved in axon guidance	BP	ENSSSCG00000023483	PLXNA3
GO:0042273	0.231485	1	1	21	ribosomal large subunit biogenesis	BP	ENSSSCG00000005920	BOP1
GO:0045177	0.231848	1	2	52	apical part of cell	CC	ENSSSCG00000014802,ENSSSCG00000029189	NUMA1,DCHS1
GO:0050982	0.232161	1	1	13	detection of mechanical stimulus	BP	ENSSSCG00000008041	PKD1
GO:0031589	0.232528	1	1	16	cell-substrate adhesion	BP	ENSSSCG00000009565	GAS6
GO:0007169	0.232597	1	3	100	transmembrane receptor protein tyrosine kinase signaling pathway	BP	ENSSSCG00000030560,ENSSSCG00000021886,ENSSSCG00000006464	--,--,NTRK1
GO:0046676	0.232627	1	1	15	negative regulation of insulin secretion	BP	ENSSSCG00000028197	PFKL
GO:0007411	0.232773	1	3	93	axon guidance	BP	ENSSSCG00000003342,ENSSSCG00000007501,ENSSSCG00000023483	DVL1,BMP7,PLXNA3
GO:0001895	0.233915	1	1	17	retina homeostasis	BP	ENSSSCG00000008948	ALB
GO:0030282	0.234011	1	1	15	bone mineralization	BP	ENSSSCG00000009219	IBSP
GO:0001892	0.234782	1	1	14	embryonic placenta development	BP	ENSSSCG00000008041	PKD1
GO:0018345	0.23519	1	1	16	protein palmitoylation	BP	ENSSSCG00000006982	ZDHHC2
GO:0090316	0.236212	1	1	13	positive regulation of intracellular protein transport	BP	ENSSSCG00000017143	CEP131
GO:0005654	0.236904	1	26	1246	nucleoplasm	CC	ENSSSCG00000006288,ENSSSCG00000008697,ENSSSCG00000001912,ENSSSCG00000005761,ENSSSCG00000003326,ENSSSCG00000008647,ENSSSCG00000030839,ENSSSCG00000014322,ENSSSCG00000005920,ENSSSCG00000003216,ENSSSCG00000005437,ENSSSCG00000014047,ENSSSCG00000007559,ENSSSCG00000013735,ENSSSCG00000000075,ENSSSCG00000012853,ENSSSCG00000014802,ENSSSCG00000005926,ENSSSCG00000013753,ENSSSCG00000008047,ENSSSCG00000012793,…	SELP,HTT,PML,PPP1R26,PEG3,CMPK2,JUN,HNRNPA0,BOP1,POLD1,KLF4,FGFR4,MAFK,--,MKL1,IRF7,NUMA1,PARP10,IER2,E4F1,HCFC1,SF1,FAAP100,SOX9,BAHCC1,ETV7
GO:0002020	0.23795	1	2	56	protease binding	MF	ENSSSCG00000029328,ENSSSCG00000027357	--,CSTB
GO:0004623	0.238071	1	1	20	phospholipase A2 activity	MF	ENSSSCG00000010023	PLA2G3
GO:0000166	0.239428	1	27	1335	nucleotide binding	MF	ENSSSCG00000012064,ENSSSCG00000030368,ENSSSCG00000030560,ENSSSCG00000029335,ENSSSCG00000010099,ENSSSCG00000025610,ENSSSCG00000012077,ENSSSCG00000017146,ENSSSCG00000012076,ENSSSCG00000027734,ENSSSCG00000028197,ENSSSCG00000014322,ENSSSCG00000006919,ENSSSCG00000030801,ENSSSCG00000001006,ENSSSCG00000006464,ENSSSCG00000017638,ENSSSCG00000003216,ENSSSCG00000014047,ENSSSCG00000008017,ENSSSCG00000023379,…	--,HSP70.2,--,--,--,AGAP3,MX1,RNF213,MX2,TNRC6C,PFKL,HNRNPA0,GBP4,GBP6,TUBB2B,NTRK1,TSPOAP1,POLD1,FGFR4,NME3,UBE2L6,KIF26B,NUMA1,--,PARP14,--,--
GO:0002076	0.239684	1	1	14	osteoblast development	BP	ENSSSCG00000012885	LRP5
GO:0021510	0.23982	1	1	13	spinal cord development	BP	ENSSSCG00000008041	PKD1
GO:0007015	0.240046	1	2	59	actin filament organization	BP	ENSSSCG00000008144,ENSSSCG00000028878	NCK2,BCAR1
GO:0002063	0.24031	1	1	14	chondrocyte development	BP	ENSSSCG00000017251	SOX9
GO:0071353	0.240735	1	1	15	cellular response to interleukin-4	BP	ENSSSCG00000001912	PML
GO:0032781	0.240787	1	1	19	positive regulation of ATPase activity	BP	ENSSSCG00000029722	--
GO:0007569	0.241453	1	1	18	cell aging	BP	ENSSSCG00000001912	PML
GO:0036342	0.242102	1	1	16	post-anal tail morphogenesis	BP	ENSSSCG00000029189	DCHS1
GO:0031235	0.242239	1	1	13	intrinsic component of the cytoplasmic side of the plasma membrane	CC	ENSSSCG00000027890	--
GO:0005623	0.242361	1	2	73	cell	CC	ENSSSCG00000028754,ENSSSCG00000027318	--,--
GO:0006368	0.242604	1	1	21	transcription elongation from RNA polymerase II promoter	BP	ENSSSCG00000008061	TCEB2
GO:0046982	0.243039	1	6	291	protein heterodimerization activity	MF	ENSSSCG00000006276,ENSSSCG00000029773,ENSSSCG00000027435,ENSSSCG00000022537,ENSSSCG00000007189,ENSSSCG00000017251	CEBPD,HIST1H4L,HIST1H3E,--,SDCBP2,SOX9
GO:0060716	0.243042	1	1	15	labyrinthine layer blood vessel development	BP	ENSSSCG00000013735	--
GO:1901215	0.243112	1	1	16	negative regulation of neuron death	BP	ENSSSCG00000003088	APOE
GO:0071222	0.24315	1	2	58	cellular response to lipopolysaccharide	BP	ENSSSCG00000008647,ENSSSCG00000008977	CMPK2,CXCL10
GO:0051537	0.243681	1	1	20	2 iron, 2 sulfur cluster binding	MF	ENSSSCG00000029606	AOX1
GO:0060384	0.2439	1	1	15	innervation	BP	ENSSSCG00000006464	NTRK1
GO:0043392	0.24461	1	1	19	negative regulation of DNA binding	BP	ENSSSCG00000030839	JUN
GO:0032331	0.245452	1	1	15	negative regulation of chondrocyte differentiation	BP	ENSSSCG00000017251	SOX9
GO:0004712	0.245471	1	1	15	protein serine/threonine/tyrosine kinase activity	MF	ENSSSCG00000012064	--
GO:0015935	0.247301	1	1	28	small ribosomal subunit	CC	ENSSSCG00000005759	MRPS2
GO:0070530	0.247676	1	1	14	K63-linked polyubiquitin binding	MF	ENSSSCG00000005926	PARP10
GO:0010800	0.248219	1	1	17	positive regulation of peptidyl-threonine phosphorylation	BP	ENSSSCG00000007501	BMP7
GO:0001654	0.248495	1	1	18	eye development	BP	ENSSSCG00000007501	BMP7
GO:0005031	0.248778	1	1	23	tumor necrosis factor-activated receptor activity	MF	ENSSSCG00000014825	RELT
GO:0048844	0.248809	1	1	13	artery morphogenesis	BP	ENSSSCG00000003088	APOE
GO:0016409	0.250037	1	1	18	palmitoyltransferase activity	MF	ENSSSCG00000006982	ZDHHC2
GO:0048513	0.250326	1	1	17	organ development	BP	ENSSSCG00000008697	HTT
GO:0005763	0.250802	1	1	20	mitochondrial small ribosomal subunit	CC	ENSSSCG00000005759	MRPS2
GO:0060349	0.250861	1	1	18	bone morphogenesis	BP	ENSSSCG00000012885	LRP5
GO:0050728	0.251246	1	2	58	negative regulation of inflammatory response	BP	ENSSSCG00000003088,ENSSSCG00000017137	APOE,METRNL
GO:0048147	0.252407	1	1	16	negative regulation of fibroblast proliferation	BP	ENSSSCG00000005926	PARP10
GO:0031016	0.252436	1	1	17	pancreas development	BP	ENSSSCG00000003702	GATA6
GO:0070412	0.25249	1	1	17	R-SMAD binding	MF	ENSSSCG00000030839	JUN
GO:0004364	0.252544	1	1	26	glutathione transferase activity	MF	ENSSSCG00000002626	--
GO:0048675	0.2527	1	1	16	axon extension	BP	ENSSSCG00000003342	DVL1
GO:0004520	0.253213	1	1	19	endodeoxyribonuclease activity	MF	ENSSSCG00000027285	DNASE1L2
GO:0032689	0.253393	1	1	18	negative regulation of interferon-gamma production	BP	ENSSSCG00000009565	GAS6
GO:0045879	0.254025	1	1	15	negative regulation of smoothened signaling pathway	BP	ENSSSCG00000023653	GLIS2
GO:0034047	0.254443	1	1	16	regulation of protein phosphatase type 2A activity	BP	ENSSSCG00000008697	HTT
GO:0030659	0.255636	1	1	15	cytoplasmic vesicle membrane	CC	ENSSSCG00000008697	HTT
GO:0001525	0.255897	1	3	102	angiogenesis	BP	ENSSSCG00000023032,ENSSSCG00000017146,ENSSSCG00000030839	SCG2,RNF213,JUN
GO:0017127	0.256042	1	1	17	cholesterol transporter activity	MF	ENSSSCG00000003088	APOE
GO:0004864	0.256285	1	1	22	protein phosphatase inhibitor activity	MF	ENSSSCG00000005761	PPP1R26
GO:0005938	0.256511	1	2	53	cell cortex	CC	ENSSSCG00000026688,ENSSSCG00000014802	--,NUMA1
GO:0005737	0.257031	1	63	3410	cytoplasm	CC	ENSSSCG00000029606,ENSSSCG00000010099,ENSSSCG00000006288,ENSSSCG00000010452,ENSSSCG00000010453,ENSSSCG00000000033,ENSSSCG00000008697,ENSSSCG00000001912,ENSSSCG00000014450,ENSSSCG00000008948,ENSSSCG00000007189,ENSSSCG00000012077,ENSSSCG00000030548,ENSSSCG00000008647,ENSSSCG00000000970,ENSSSCG00000027868,ENSSSCG00000011723,ENSSSCG00000017192,ENSSSCG00000016578,ENSSSCG00000030408,ENSSSCG00000028197,…	AOX1,--,SELP,IFIT3,IFIT1,TSPO,HTT,PML,TCOF1,ALB,SDCBP2,MX1,--,CMPK2,PPP6R2,--,MME,EVPL,FLNC,DDX58,PFKL,DHX58,SH3GL2,--,BOP1,TUBB2B,--,GLIS2,NTRK1,ALDH1L1,TSPOAP1,POLD1,--,PRDX3,KLF4,FGFR4,C19orf66,ISG20,APBB1,CAPN15,PKD1,MKL1,IRF7,FIZ1,GADD45G,NUMA1,PARP10,GOT1,IER2,WT1,ZBP1,GAS6,HCFC1,CSTB,APC2,TELO2,MIB2,FAAP100,PARP14,FAM213A,--,BCAR1,--
GO:0061136	0.257529	1	2	49	regulation of proteasomal protein catabolic process	BP	ENSSSCG00000000774,ENSSSCG00000008041	USP18,PKD1
GO:0005892	0.257767	1	1	18	acetylcholine-gated channel complex	CC	ENSSSCG00000017188	ZACN
GO:0017154	0.257972	1	1	16	semaphorin receptor activity	MF	ENSSSCG00000023483	PLXNA3
GO:0061028	0.257994	1	1	15	establishment of endothelial barrier	BP	ENSSSCG00000010123	CLDN5
GO:0070059	0.258413	1	1	18	intrinsic apoptotic signaling pathway in response to endoplasmic reticulum stress	BP	ENSSSCG00000001912	PML
GO:0005667	0.259707	1	4	147	transcription factor complex	CC	ENSSSCG00000030839,ENSSSCG00000003702,ENSSSCG00000013735,ENSSSCG00000017251	JUN,GATA6,--,SOX9
GO:0010977	0.26001	1	1	19	negative regulation of neuron projection development	BP	ENSSSCG00000021289	GAK
GO:0007269	0.260068	1	1	20	neurotransmitter secretion	BP	ENSSSCG00000003342	DVL1
GO:0048709	0.261673	1	1	16	oligodendrocyte differentiation	BP	ENSSSCG00000017251	SOX9
GO:0004866	0.262973	1	1	17	endopeptidase inhibitor activity	MF	ENSSSCG00000027357	CSTB
GO:0019068	0.26408	1	1	20	virion assembly	BP	ENSSSCG00000003088	APOE
GO:0033137	0.264585	1	1	17	negative regulation of peptidyl-serine phosphorylation	BP	ENSSSCG00000008144	NCK2
GO:0005977	0.264935	1	1	19	glycogen metabolic process	BP	ENSSSCG00000007530	PPP1R3D
GO:0048488	0.265009	1	1	19	synaptic vesicle endocytosis	BP	ENSSSCG00000005177	SH3GL2
GO:0045648	0.265783	1	1	17	positive regulation of erythrocyte differentiation	BP	ENSSSCG00000027982	ISG15
GO:0071158	0.266229	1	1	19	positive regulation of cell cycle arrest	BP	ENSSSCG00000003702	GATA6
GO:0006695	0.266234	1	1	17	cholesterol biosynthetic process	BP	ENSSSCG00000003088	APOE
GO:0035329	0.266671	1	1	17	hippo signaling	BP	ENSSSCG00000029189	DCHS1
GO:0050766	0.266886	1	1	19	positive regulation of phagocytosis	BP	ENSSSCG00000009565	GAS6
GO:0007159	0.268772	1	1	18	leukocyte cell-cell adhesion	BP	ENSSSCG00000006288	SELP
GO:0030100	0.268809	1	1	20	regulation of endocytosis	BP	ENSSSCG00000013244	--
GO:0030879	0.269151	1	1	17	mammary gland development	BP	ENSSSCG00000017251	SOX9
GO:0006471	0.269823	1	1	18	protein ADP-ribosylation	BP	ENSSSCG00000005926	PARP10
GO:0042542	0.270482	1	1	20	response to hydrogen peroxide	BP	ENSSSCG00000010682	PRDX3
GO:0051881	0.271105	1	1	22	regulation of mitochondrial membrane potential	BP	ENSSSCG00000010682	PRDX3
GO:0008589	0.271578	1	1	14	regulation of smoothened signaling pathway	BP	ENSSSCG00000008020	IFT140
GO:0002040	0.272353	1	1	18	sprouting angiogenesis	BP	ENSSSCG00000015399	SEMA3E
GO:0009888	0.273299	1	1	19	tissue development	BP	ENSSSCG00000003702	GATA6
GO:0030316	0.273314	1	1	19	osteoclast differentiation	BP	ENSSSCG00000013735	--
GO:0071902	0.273443	1	1	21	positive regulation of protein serine/threonine kinase activity	BP	ENSSSCG00000008022	TELO2
GO:0007050	0.273616	1	2	54	cell cycle arrest	BP	ENSSSCG00000001912,ENSSSCG00000008041	PML,PKD1
GO:0008270	0.274382	1	20	993	zinc ion binding	MF	ENSSSCG00000022963,ENSSSCG00000001912,ENSSSCG00000014303,ENSSSCG00000017146,ENSSSCG00000010728,ENSSSCG00000011723,ENSSSCG00000030408,ENSSSCG00000017416,ENSSSCG00000002341,ENSSSCG00000006982,ENSSSCG00000003702,ENSSSCG00000030108,ENSSSCG00000007993,ENSSSCG00000029723,ENSSSCG00000004679,ENSSSCG00000002656,ENSSSCG00000013021,ENSSSCG00000003350,ENSSSCG00000003351,ENSSSCG00000012947	--,PML,JADE2,RNF213,CPXM2,MME,DDX58,DHX58,PAPLN,ZDHHC2,GATA6,--,CAPN15,PHRF1,SORD,ZCCHC14,SF1,MIB2,MMP23B,--
GO:0007631	0.274594	1	1	23	feeding behavior	BP	ENSSSCG00000026943	MRAP2
GO:0006509	0.27483	1	1	17	membrane protein ectodomain proteolysis	BP	ENSSSCG00000026688	--
GO:0005741	0.275025	1	2	69	mitochondrial outer membrane	CC	ENSSSCG00000008834,ENSSSCG00000008648	--,RSAD2
GO:0003785	0.278418	1	1	26	actin monomer binding	MF	ENSSSCG00000000075	MKL1
GO:0061098	0.278665	1	1	20	positive regulation of protein tyrosine kinase activity	BP	ENSSSCG00000009565	GAS6
GO:0048593	0.27919	1	1	16	camera-type eye morphogenesis	BP	ENSSSCG00000007501	BMP7
GO:0007219	0.279936	1	2	64	Notch signaling pathway	BP	ENSSSCG00000010537,ENSSSCG00000017251	GOT1,SOX9
GO:0048738	0.279969	1	1	21	cardiac muscle tissue development	BP	ENSSSCG00000003702	GATA6
GO:0060828	0.280639	1	1	17	regulation of canonical Wnt signaling pathway	BP	ENSSSCG00000012885	LRP5
GO:0000175	0.282654	1	1	19	3'-5'-exoribonuclease activity	MF	ENSSSCG00000024867	ISG20
GO:0034399	0.283073	1	1	13	nuclear periphery	CC	ENSSSCG00000008022	TELO2
GO:0030414	0.283491	1	1	31	peptidase inhibitor activity	MF	ENSSSCG00000022913	SLPI
GO:0007339	0.284036	1	1	21	binding of sperm to zona pellucida	BP	ENSSSCG00000030368	HSP70.2
GO:0006325	0.285592	1	1	31	chromatin organization	BP	ENSSSCG00000022537	--
GO:0035094	0.285971	1	1	21	response to nicotine	BP	ENSSSCG00000017188	ZACN
GO:0032715	0.287109	1	1	20	negative regulation of interleukin-6 production	BP	ENSSSCG00000009565	GAS6
GO:0006641	0.288266	1	1	18	triglyceride metabolic process	BP	ENSSSCG00000003088	APOE
GO:0010975	0.289298	1	1	19	regulation of neuron projection development	BP	ENSSSCG00000027868	--
GO:0061512	0.289559	1	1	23	protein localization to cilium	BP	ENSSSCG00000008020	IFT140
GO:0006261	0.289942	1	1	19	DNA-dependent DNA replication	BP	ENSSSCG00000003216	POLD1
GO:0001518	0.290241	1	1	15	voltage-gated sodium channel complex	CC	ENSSSCG00000015913	SCN9A
GO:0035116	0.290748	1	1	21	embryonic hindlimb morphogenesis	BP	ENSSSCG00000030095	ZBTB16
GO:0030819	0.291757	1	1	24	positive regulation of cAMP biosynthetic process	BP	ENSSSCG00000026943	MRAP2
GO:0005543	0.292861	1	2	66	phospholipid binding	MF	ENSSSCG00000003088,ENSSSCG00000013244	APOE,--
GO:0045070	0.292966	1	1	18	positive regulation of viral genome replication	BP	ENSSSCG00000010453	IFIT1
GO:0010332	0.293462	1	1	20	response to gamma radiation	BP	ENSSSCG00000001912	PML
GO:0009887	0.293467	1	2	62	organ morphogenesis	BP	ENSSSCG00000003702,ENSSSCG00000007501	GATA6,BMP7
GO:0006520	0.295025	1	1	21	cellular amino acid metabolic process	BP	ENSSSCG00000010537	GOT1
GO:0045296	0.295148	1	1	23	cadherin binding	MF	ENSSSCG00000026688	--
GO:0071339	0.295743	1	1	18	MLL1 complex	CC	ENSSSCG00000012793	HCFC1
GO:0004198	0.297763	1	1	21	calcium-dependent cysteine-type endopeptidase activity	MF	ENSSSCG00000007993	CAPN15
GO:0032008	0.299217	1	1	22	positive regulation of TOR signaling	BP	ENSSSCG00000008007	WDR24
GO:0051879	0.30019	1	1	19	Hsp90 protein binding	MF	ENSSSCG00000008022	TELO2
GO:0004889	0.300613	1	1	22	acetylcholine-activated cation-selective channel activity	MF	ENSSSCG00000017188	ZACN
GO:0010033	0.301754	1	1	20	response to organic substance	BP	ENSSSCG00000005437	KLF4
GO:0055007	0.302495	1	1	20	cardiac muscle cell differentiation	BP	ENSSSCG00000003702	GATA6
GO:0004029	0.302661	1	1	22	aldehyde dehydrogenase (NAD) activity	MF	ENSSSCG00000030626	ALDH1L1
GO:0071560	0.30305	1	1	21	cellular response to transforming growth factor beta stimulus	BP	ENSSSCG00000017251	SOX9
GO:0004867	0.303077	1	2	77	serine-type endopeptidase inhibitor activity	MF	ENSSSCG00000002341,ENSSSCG00000022913	PAPLN,SLPI
GO:0001656	0.303145	1	1	20	metanephros development	BP	ENSSSCG00000007501	BMP7
GO:0032526	0.303547	1	1	21	response to retinoic acid	BP	ENSSSCG00000005437	KLF4
GO:0005829	0.304068	1	15	759	cytosol	CC	ENSSSCG00000029463,ENSSSCG00000010452,ENSSSCG00000010453,ENSSSCG00000008697,ENSSSCG00000001912,ENSSSCG00000012077,ENSSSCG00000008647,ENSSSCG00000017189,ENSSSCG00000028197,ENSSSCG00000029328,ENSSSCG00000010682,ENSSSCG00000008017,ENSSSCG00000003342,ENSSSCG00000010537,ENSSSCG00000007508	--,IFIT3,IFIT1,HTT,PML,MX1,CMPK2,GALR2,PFKL,--,PRDX3,NME3,DVL1,GOT1,ZBP1
GO:0008408	0.305281	1	1	20	3'-5' exonuclease activity	MF	ENSSSCG00000003216	POLD1
GO:0007188	0.306115	1	1	25	adenylate cyclase-modulating G-protein coupled receptor signaling pathway	BP	ENSSSCG00000017189	GALR2
GO:0016922	0.308354	1	1	18	ligand-dependent nuclear receptor binding	MF	ENSSSCG00000009761	--
GO:2001235	0.308558	1	1	23	positive regulation of apoptotic signaling pathway	BP	ENSSSCG00000001912	PML
GO:0048813	0.308593	1	1	20	dendrite morphogenesis	BP	ENSSSCG00000003342	DVL1
GO:0005769	0.309398	1	3	107	early endosome	CC	ENSSSCG00000006464,ENSSSCG00000010682,ENSSSCG00000003350	NTRK1,PRDX3,MIB2
GO:0015630	0.309537	1	3	108	microtubule cytoskeleton	CC	ENSSSCG00000003342,ENSSSCG00000023329,ENSSSCG00000017143	DVL1,APC2,CEP131
GO:0004181	0.309604	1	1	24	metallocarboxypeptidase activity	MF	ENSSSCG00000010728	CPXM2
GO:0018149	0.309929	1	1	19	peptide cross-linking	BP	ENSSSCG00000017192	EVPL
GO:0001103	0.311213	1	1	20	RNA polymerase II repressing transcription factor binding	MF	ENSSSCG00000003702	GATA6
GO:0008233	0.311539	1	6	288	peptidase activity	MF	ENSSSCG00000011723,ENSSSCG00000002341,ENSSSCG00000007993,ENSSSCG00000003351,ENSSSCG00000014169,ENSSSCG00000013418	MME,PAPLN,CAPN15,MMP23B,PCSK1,CFD
GO:0015464	0.311546	1	1	23	acetylcholine receptor activity	MF	ENSSSCG00000017188	ZACN
GO:0009749	0.312169	1	1	21	response to glucose	BP	ENSSSCG00000028197	PFKL
GO:0042166	0.312904	1	1	23	acetylcholine binding	MF	ENSSSCG00000017188	ZACN
GO:0001105	0.312981	1	1	26	RNA polymerase II transcription coactivator activity	MF	ENSSSCG00000000075	MKL1
GO:0055038	0.313879	1	1	24	recycling endosome membrane	CC	ENSSSCG00000006982	ZDHHC2
GO:0050900	0.316133	1	1	21	leukocyte migration	BP	ENSSSCG00000006288	SELP
GO:0045765	0.316191	1	1	22	regulation of angiogenesis	BP	ENSSSCG00000016620	TSPAN12
GO:0050661	0.316823	1	1	21	NADP binding	MF	ENSSSCG00000015268	FMO1
GO:0001937	0.32017	1	1	22	negative regulation of endothelial cell proliferation	BP	ENSSSCG00000003088	APOE
GO:0005743	0.320989	1	4	198	mitochondrial inner membrane	CC	ENSSSCG00000026631,ENSSSCG00000026688,ENSSSCG00000008675,ENSSSCG00000008648	SLC25A6,--,LETM1,RSAD2
GO:0016810	0.323018	1	1	23	hydrolase activity, acting on carbon-nitrogen (but not peptide) bonds	MF	ENSSSCG00000027868	--
GO:0043627	0.323689	1	1	20	response to estrogen	BP	ENSSSCG00000003702	GATA6
GO:0006611	0.324208	1	1	21	protein export from nucleus	BP	ENSSSCG00000008041	PKD1
GO:0071320	0.324279	1	1	22	cellular response to cAMP	BP	ENSSSCG00000013316	WT1
GO:0015701	0.324442	1	1	21	bicarbonate transport	BP	ENSSSCG00000022956	--
GO:0006633	0.326071	1	1	24	fatty acid biosynthetic process	BP	ENSSSCG00000008857	MSMO1
GO:0016746	0.326398	1	2	70	transferase activity, transferring acyl groups	MF	ENSSSCG00000006982,ENSSSCG00000012947	ZDHHC2,--
GO:0051017	0.326812	1	1	24	actin filament bundle assembly	BP	ENSSSCG00000027868	--
GO:0051973	0.327338	1	1	23	positive regulation of telomerase activity	BP	ENSSSCG00000005437	KLF4
GO:0009952	0.327849	1	2	75	anterior/posterior pattern specification	BP	ENSSSCG00000030095,ENSSSCG00000012885	ZBTB16,LRP5
GO:0030215	0.330536	1	1	26	semaphorin receptor binding	MF	ENSSSCG00000015399	SEMA3E
GO:0033344	0.330889	1	1	23	cholesterol efflux	BP	ENSSSCG00000003088	APOE
GO:0048873	0.331104	1	1	22	homeostasis of number of cells within a tissue	BP	ENSSSCG00000017251	SOX9
GO:0005096	0.331528	1	4	158	GTPase activator activity	MF	ENSSSCG00000025610,ENSSSCG00000030839,ENSSSCG00000027890,ENSSSCG00000017136	AGAP3,JUN,--,TBCD
GO:0072332	0.331836	1	1	25	intrinsic apoptotic signaling pathway by p53 class mediator	BP	ENSSSCG00000001912	PML
GO:0090090	0.332748	1	2	65	negative regulation of canonical Wnt signaling pathway	BP	ENSSSCG00000023329,ENSSSCG00000017251	APC2,SOX9
GO:0006979	0.333017	1	2	72	response to oxidative stress	BP	ENSSSCG00000003088,ENSSSCG00000010682	APOE,PRDX3
GO:0060325	0.333061	1	1	19	face morphogenesis	BP	ENSSSCG00000002669	CRISPLD2
GO:0006909	0.333073	1	1	23	phagocytosis	BP	ENSSSCG00000009565	GAS6
GO:0001707	0.333117	1	1	24	mesoderm formation	BP	ENSSSCG00000007501	BMP7
GO:0045786	0.333372	1	1	23	negative regulation of cell cycle	BP	ENSSSCG00000007501	BMP7
GO:0050660	0.333488	1	2	66	flavin adenine dinucleotide binding	MF	ENSSSCG00000029606,ENSSSCG00000015268	AOX1,FMO1
GO:0016324	0.333918	1	3	122	apical plasma membrane	CC	ENSSSCG00000026688,ENSSSCG00000011643,ENSSSCG00000010325	--,--,KCNMA1
GO:0007030	0.334232	1	2	67	Golgi organization	BP	ENSSSCG00000021289,ENSSSCG00000008697	GAK,HTT
GO:0042771	0.334241	1	1	23	intrinsic apoptotic signaling pathway in response to DNA damage by p53 class mediator	BP	ENSSSCG00000001912	PML
GO:0016620	0.33475	1	1	24	oxidoreductase activity, acting on the aldehyde or oxo group of donors, NAD or NADP as acceptor	MF	ENSSSCG00000030626	ALDH1L1
GO:0001569	0.335523	1	1	24	patterning of blood vessels	BP	ENSSSCG00000015399	SEMA3E
GO:0032720	0.336167	1	1	27	negative regulation of tumor necrosis factor production	BP	ENSSSCG00000009565	GAS6
GO:0002230	0.336513	1	2	72	positive regulation of defense response to virus by host	BP	ENSSSCG00000005759,ENSSSCG00000030408	MRPS2,DDX58
GO:0016887	0.336817	1	5	200	ATPase activity	MF	ENSSSCG00000029335,ENSSSCG00000017146,ENSSSCG00000017148,ENSSSCG00000025593,ENSSSCG00000001680	--,RNF213,--,--,--
GO:0001046	0.338072	1	1	23	core promoter sequence-specific DNA binding	MF	ENSSSCG00000017251	SOX9
GO:0006096	0.338375	1	1	30	glycolytic process	BP	ENSSSCG00000028197	PFKL
GO:0032755	0.338643	1	1	24	positive regulation of interleukin-6 production	BP	ENSSSCG00000030408	DDX58
GO:0051092	0.338805	1	2	78	positive regulation of NF-kappaB transcription factor activity	BP	ENSSSCG00000006464,ENSSSCG00000010682	NTRK1,PRDX3
GO:0005125	0.340124	1	3	174	cytokine activity	MF	ENSSSCG00000023032,ENSSSCG00000007501,ENSSSCG00000020771	SCG2,BMP7,INHA
GO:0015485	0.340226	1	1	25	cholesterol binding	MF	ENSSSCG00000003088	APOE
GO:0005975	0.340729	1	4	183	carbohydrate metabolic process	BP	ENSSSCG00000003145,ENSSSCG00000025005,ENSSSCG00000002737,ENSSSCG00000007530	FUT2,B4GALT6,CHST4,PPP1R3D
GO:0007155	0.34147	1	6	267	cell adhesion	BP	ENSSSCG00000006288,ENSSSCG00000005751,ENSSSCG00000009219,ENSSSCG00000014822,ENSSSCG00000029189,ENSSSCG00000007379	SELP,COL5A1,IBSP,--,DCHS1,WISP2
GO:0016235	0.341821	1	1	22	aggresome	CC	ENSSSCG00000003216	POLD1
GO:0005814	0.34254	1	2	63	centriole	CC	ENSSSCG00000008697,ENSSSCG00000010023	HTT,PLA2G3
GO:0030513	0.342902	1	1	24	positive regulation of BMP signaling pathway	BP	ENSSSCG00000003702	GATA6
GO:0032760	0.343086	1	1	27	positive regulation of tumor necrosis factor production	BP	ENSSSCG00000029328	--
GO:0030308	0.343338	1	2	72	negative regulation of cell growth	BP	ENSSSCG00000001912,ENSSSCG00000007576	PML,FOXK1
GO:0030032	0.343386	1	1	23	lamellipodium assembly	BP	ENSSSCG00000008144	NCK2
GO:0019904	0.343967	1	3	122	protein domain specific binding	MF	ENSSSCG00000029773,ENSSSCG00000008041,ENSSSCG00000002026	HIST1H4L,PKD1,EFS
GO:0000228	0.344761	1	1	25	nuclear chromosome	CC	ENSSSCG00000029773	HIST1H4L
GO:0009897	0.345517	1	3	136	external side of plasma membrane	CC	ENSSSCG00000021006,ENSSSCG00000006288,ENSSSCG00000008977	--,SELP,CXCL10
GO:0019228	0.345685	1	1	21	neuronal action potential	BP	ENSSSCG00000015913	SCN9A
GO:0030501	0.345715	1	1	25	positive regulation of bone mineralization	BP	ENSSSCG00000007501	BMP7
GO:0005248	0.347695	1	1	21	voltage-gated sodium channel activity	MF	ENSSSCG00000015913	SCN9A
GO:0030154	0.348784	1	4	193	cell differentiation	BP	ENSSSCG00000005437,ENSSSCG00000007576,ENSSSCG00000017251,ENSSSCG00000001561	KLF4,FOXK1,SOX9,ETV7
GO:0007507	0.350572	1	4	158	heart development	BP	ENSSSCG00000003702,ENSSSCG00000008041,ENSSSCG00000008020,ENSSSCG00000017251	GATA6,PKD1,IFT140,SOX9
GO:0016757	0.351301	1	3	128	transferase activity, transferring glycosyl groups	MF	ENSSSCG00000003145,ENSSSCG00000025005,ENSSSCG00000021610	FUT2,B4GALT6,CHPF
GO:0005575	0.351419	1	1	31	cellular_component	CC	ENSSSCG00000015636	VSTM2A
GO:0003887	0.352902	1	1	24	DNA-directed DNA polymerase activity	MF	ENSSSCG00000003216	POLD1
GO:0000123	0.352942	1	1	22	histone acetyltransferase complex	CC	ENSSSCG00000012793	HCFC1
GO:0016337	0.35387	1	2	65	single organismal cell-cell adhesion	BP	ENSSSCG00000008041,ENSSSCG00000017251	PKD1,SOX9
GO:0008009	0.354321	1	1	41	chemokine activity	MF	ENSSSCG00000008977	CXCL10
GO:0007173	0.354901	1	1	25	epidermal growth factor receptor signaling pathway	BP	ENSSSCG00000017251	SOX9
GO:1902476	0.355811	1	2	74	chloride transmembrane transport	BP	ENSSSCG00000022956,ENSSSCG00000007565	--,TTYH3
GO:0005272	0.355887	1	1	21	sodium channel activity	MF	ENSSSCG00000015913	SCN9A
GO:0007200	0.356436	1	1	27	phospholipase C-activating G-protein coupled receptor signaling pathway	BP	ENSSSCG00000017189	GALR2
GO:0020037	0.358141	1	3	141	heme binding	MF	ENSSSCG00000021406,ENSSSCG00000007978,ENSSSCG00000025273	--,--,CYP11A1
GO:0004222	0.360714	1	3	124	metalloendopeptidase activity	MF	ENSSSCG00000011723,ENSSSCG00000002341,ENSSSCG00000003351	MME,PAPLN,MMP23B
GO:0001501	0.363032	1	2	70	skeletal system development	BP	ENSSSCG00000030095,ENSSSCG00000017251	ZBTB16,SOX9
GO:0016310	0.363827	1	7	327	phosphorylation	BP	ENSSSCG00000028102,ENSSSCG00000030560,ENSSSCG00000028197,ENSSSCG00000006464,ENSSSCG00000014047,ENSSSCG00000008017,ENSSSCG00000010861	TOLLIP,--,PFKL,NTRK1,FGFR4,NME3,COQ8A
GO:0001657	0.366676	1	1	27	ureteric bud development	BP	ENSSSCG00000007501	BMP7
GO:0005765	0.367802	1	3	124	lysosomal membrane	CC	ENSSSCG00000026688,ENSSSCG00000022506,ENSSSCG00000012978	--,--,AP5B1
GO:0045668	0.368892	1	1	27	negative regulation of osteoblast differentiation	BP	ENSSSCG00000012885	LRP5
GO:0006352	0.368951	1	1	30	DNA-templated transcription, initiation	BP	ENSSSCG00000029773	HIST1H4L
GO:0046580	0.36903	1	1	22	negative regulation of Ras protein signal transduction	BP	ENSSSCG00000027890	--
GO:0035176	0.369746	1	1	24	social behavior	BP	ENSSSCG00000003342	DVL1
GO:0043621	0.369842	1	1	23	protein self-association	MF	ENSSSCG00000008648	RSAD2
GO:0006260	0.370091	1	2	78	DNA replication	BP	ENSSSCG00000003216,ENSSSCG00000008047	POLD1,E4F1
GO:0008544	0.370533	1	1	24	epidermis development	BP	ENSSSCG00000017192	EVPL
GO:0046332	0.370704	1	1	27	SMAD binding	MF	ENSSSCG00000001912	PML
GO:0043085	0.372094	1	1	34	positive regulation of catalytic activity	BP	ENSSSCG00000014047	FGFR4
GO:0030177	0.372261	1	1	27	positive regulation of Wnt signaling pathway	BP	ENSSSCG00000003342	DVL1
GO:0008284	0.372506	1	5	249	positive regulation of cell proliferation	BP	ENSSSCG00000010682,ENSSSCG00000014047,ENSSSCG00000012885,ENSSSCG00000017251,ENSSSCG00000017143	PRDX3,FGFR4,LRP5,SOX9,CEP131
GO:0031175	0.373143	1	2	71	neuron projection development	BP	ENSSSCG00000017189,ENSSSCG00000000075	GALR2,MKL1
GO:0007274	0.373206	1	1	28	neuromuscular synaptic transmission	BP	ENSSSCG00000017188	ZACN
GO:0000118	0.373241	1	1	21	histone deacetylase complex	CC	ENSSSCG00000009761	--
GO:0003674	0.375862	1	1	35	molecular_function	MF	ENSSSCG00000015636	VSTM2A
GO:0016747	0.376187	1	1	29	transferase activity, transferring acyl groups other than amino-acyl groups	MF	ENSSSCG00000003853	--
GO:0006807	0.377016	1	1	23	nitrogen compound metabolic process	BP	ENSSSCG00000008041	PKD1
GO:0006508	0.377408	1	10	552	proteolysis	BP	ENSSSCG00000008723,ENSSSCG00000010728,ENSSSCG00000011723,ENSSSCG00000002341,ENSSSCG00000023362,ENSSSCG00000007993,ENSSSCG00000013442,ENSSSCG00000003351,ENSSSCG00000014169,ENSSSCG00000013418	HTRA3,CPXM2,MME,PAPLN,RHBDF2,CAPN15,ABHD17A,MMP23B,PCSK1,CFD
GO:0031122	0.377803	1	1	28	cytoplasmic microtubule organization	BP	ENSSSCG00000003342	DVL1
GO:0051453	0.380748	1	1	26	regulation of intracellular pH	BP	ENSSSCG00000022956	--
GO:0030529	0.380937	1	3	165	ribonucleoprotein complex	CC	ENSSSCG00000005759,ENSSSCG00000005920,ENSSSCG00000021825	MRPS2,BOP1,RPS21
GO:0008217	0.381606	1	1	30	regulation of blood pressure	BP	ENSSSCG00000012885	LRP5
GO:0006284	0.382828	1	1	30	base-excision repair	BP	ENSSSCG00000007982	MPG
GO:0050662	0.388266	1	1	28	coenzyme binding	MF	ENSSSCG00000021767	--
GO:0001102	0.388366	1	1	26	RNA polymerase II activating transcription factor binding	MF	ENSSSCG00000030839	JUN
GO:0030838	0.388635	1	1	31	positive regulation of actin filament polymerization	BP	ENSSSCG00000008144	NCK2
GO:0030199	0.3892	1	1	23	collagen fibril organization	BP	ENSSSCG00000005751	COL5A1
GO:0019933	0.389431	1	1	24	cAMP-mediated signaling	BP	ENSSSCG00000017251	SOX9
GO:0048306	0.390062	1	1	31	calcium-dependent protein binding	MF	ENSSSCG00000006288	SELP
GO:0071300	0.390326	1	1	26	cellular response to retinoic acid	BP	ENSSSCG00000017251	SOX9
GO:0030136	0.39063	1	1	25	clathrin-coated vesicle	CC	ENSSSCG00000003342	DVL1
GO:0046777	0.391459	1	3	123	protein autophosphorylation	BP	ENSSSCG00000012064,ENSSSCG00000006464,ENSSSCG00000014047	--,NTRK1,FGFR4
GO:0030514	0.393279	1	1	32	negative regulation of BMP signaling pathway	BP	ENSSSCG00000008723	HTRA3
GO:0009636	0.396409	1	1	31	response to toxic substance	BP	ENSSSCG00000015913	SCN9A
GO:0032947	0.396577	1	1	25	protein complex scaffold	MF	ENSSSCG00000008022	TELO2
GO:0043330	0.397081	1	1	49	response to exogenous dsRNA	BP	ENSSSCG00000030408	DDX58
GO:0016604	0.398324	1	1	27	nuclear body	CC	ENSSSCG00000030095	ZBTB16
GO:0048013	0.398439	1	1	29	ephrin receptor signaling pathway	BP	ENSSSCG00000008144	NCK2
GO:0015030	0.399342	1	1	30	Cajal body	CC	ENSSSCG00000024867	ISG20
GO:0071347	0.39939	1	1	37	cellular response to interleukin-1	BP	ENSSSCG00000017251	SOX9
GO:0006890	0.400588	1	1	29	retrograde vesicle-mediated transport, Golgi to ER	BP	ENSSSCG00000008697	HTT
GO:0005770	0.400649	1	2	74	late endosome	CC	ENSSSCG00000008697,ENSSSCG00000006464	HTT,NTRK1
GO:0097110	0.40087	1	1	26	scaffold protein binding	MF	ENSSSCG00000008144	NCK2
GO:0005876	0.401518	1	1	29	spindle microtubule	CC	ENSSSCG00000014802	NUMA1
GO:0008543	0.402516	1	1	38	fibroblast growth factor receptor signaling pathway	BP	ENSSSCG00000014047	FGFR4
GO:0045499	0.404349	1	1	33	chemorepellent activity	MF	ENSSSCG00000015399	SEMA3E
GO:0016607	0.406512	1	2	72	nuclear speck	CC	ENSSSCG00000030095,ENSSSCG00000023653	ZBTB16,GLIS2
GO:0007596	0.406908	1	1	29	blood coagulation	BP	ENSSSCG00000009565	GAS6
GO:0005794	0.408717	1	11	568	Golgi apparatus	CC	ENSSSCG00000021289,ENSSSCG00000008697,ENSSSCG00000008948,ENSSSCG00000003088,ENSSSCG00000006982,ENSSSCG00000003145,ENSSSCG00000014047,ENSSSCG00000005926,ENSSSCG00000023329,ENSSSCG00000012947,ENSSSCG00000002633	GAK,HTT,ALB,APOE,ZDHHC2,FUT2,FGFR4,PARP10,APC2,--,--
GO:0015914	0.410464	1	1	35	phospholipid transport	BP	ENSSSCG00000003853	--
GO:0043235	0.410834	1	2	76	receptor complex	CC	ENSSSCG00000006464,ENSSSCG00000012885	NTRK1,LRP5
GO:0034599	0.412026	1	1	31	cellular response to oxidative stress	BP	ENSSSCG00000010682	PRDX3
GO:0015629	0.412672	1	3	129	actin cytoskeleton	CC	ENSSSCG00000030408,ENSSSCG00000024018,ENSSSCG00000028878	DDX58,SLC16A3,BCAR1
GO:0008237	0.414732	1	3	139	metallopeptidase activity	MF	ENSSSCG00000011723,ENSSSCG00000002341,ENSSSCG00000003351	MME,PAPLN,MMP23B
GO:0043022	0.41513	1	1	31	ribosome binding	MF	ENSSSCG00000021825	RPS21
GO:0033209	0.415403	1	1	40	tumor necrosis factor-mediated signaling pathway	BP	ENSSSCG00000014825	RELT
GO:0005912	0.417626	1	1	30	adherens junction	CC	ENSSSCG00000017136	TBCD
GO:0009411	0.418723	1	1	28	response to UV	BP	ENSSSCG00000001912	PML
GO:0005789	0.419187	1	4	208	endoplasmic reticulum membrane	CC	ENSSSCG00000015268,ENSSSCG00000008648,ENSSSCG00000000964,ENSSSCG00000023362	FMO1,RSAD2,LMF2,RHBDF2
GO:0030216	0.420252	1	1	31	keratinocyte differentiation	BP	ENSSSCG00000017192	EVPL
GO:0002062	0.420787	1	1	33	chondrocyte differentiation	BP	ENSSSCG00000017251	SOX9
GO:0007265	0.421264	1	1	27	Ras protein signal transduction	BP	ENSSSCG00000030839	JUN
GO:0004190	0.421805	1	1	37	aspartic-type endopeptidase activity	MF	ENSSSCG00000026688	--
GO:0016705	0.422491	1	2	95	oxidoreductase activity, acting on paired donors, with incorporation or reduction of molecular oxygen	MF	ENSSSCG00000021406,ENSSSCG00000025273	--,CYP11A1
GO:0048839	0.422766	1	1	31	inner ear development	BP	ENSSSCG00000006276	CEBPD
GO:0010595	0.423039	1	1	31	positive regulation of endothelial cell migration	BP	ENSSSCG00000028878	BCAR1
GO:0072686	0.423244	1	1	30	mitotic spindle	CC	ENSSSCG00000014802	NUMA1
GO:0032587	0.423918	1	1	30	ruffle membrane	CC	ENSSSCG00000030408	DDX58
GO:0005884	0.424745	1	1	31	actin filament	CC	ENSSSCG00000023329	APC2
GO:0035690	0.426515	1	1	35	cellular response to drug	BP	ENSSSCG00000009565	GAS6
GO:0051259	0.426635	1	1	33	protein oligomerization	BP	ENSSSCG00000028197	PFKL
GO:0006486	0.427274	1	2	91	protein glycosylation	BP	ENSSSCG00000003145,ENSSSCG00000009881	FUT2,OAS2
GO:0050679	0.428382	1	1	34	positive regulation of epithelial cell proliferation	BP	ENSSSCG00000017251	SOX9
GO:0030027	0.430086	1	2	82	lamellipodium	CC	ENSSSCG00000014628,ENSSSCG00000028878	APBB1,BCAR1
GO:0004896	0.433809	1	1	36	cytokine receptor activity	MF	ENSSSCG00000025188	--
GO:0005881	0.435142	1	1	33	cytoplasmic microtubule	CC	ENSSSCG00000023329	APC2
GO:0005903	0.437832	1	1	30	brush border	CC	ENSSSCG00000011723	MME
GO:0008144	0.438921	1	1	32	drug binding	MF	ENSSSCG00000008948	ALB
GO:0042102	0.439762	1	1	41	positive regulation of T cell proliferation	BP	ENSSSCG00000008144	NCK2
GO:0021766	0.440935	1	1	33	hippocampus development	BP	ENSSSCG00000023483	PLXNA3
GO:0048705	0.443056	1	1	33	skeletal system morphogenesis	BP	ENSSSCG00000008020	IFT140
GO:0003723	0.443105	1	7	387	RNA binding	MF	ENSSSCG00000010452,ENSSSCG00000010453,ENSSSCG00000013664,ENSSSCG00000007508,ENSSSCG00000013021,ENSSSCG00000011874,ENSSSCG00000009881	IFIT3,IFIT1,C19orf66,ZBP1,SF1,PARP14,OAS2
GO:0034644	0.444131	1	1	28	cellular response to UV	BP	ENSSSCG00000003216	POLD1
GO:0005109	0.446169	1	1	35	frizzled binding	MF	ENSSSCG00000003342	DVL1
GO:0008630	0.447597	1	1	36	intrinsic apoptotic signaling pathway in response to DNA damage	BP	ENSSSCG00000001912	PML
GO:0060348	0.447693	1	1	31	bone development	BP	ENSSSCG00000012885	LRP5
GO:0055088	0.448794	1	1	34	lipid homeostasis	BP	ENSSSCG00000003088	APOE
GO:0045171	0.448913	1	1	34	intercellular bridge	CC	ENSSSCG00000017143	CEP131
GO:0006816	0.451474	1	2	84	calcium ion transport	BP	ENSSSCG00000026688,ENSSSCG00000008041	--,PKD1
GO:0003151	0.452721	1	1	31	outflow tract morphogenesis	BP	ENSSSCG00000030839	JUN
GO:0042277	0.453352	1	1	39	peptide binding	MF	ENSSSCG00000011723	MME
GO:0002376	0.456556	1	1	42	immune system process	BP	ENSSSCG00000013418	CFD
GO:0022627	0.460037	1	1	66	cytosolic small ribosomal subunit	CC	ENSSSCG00000021825	RPS21
GO:0032956	0.460256	1	1	33	regulation of actin cytoskeleton organization	BP	ENSSSCG00000020777	--
GO:0042475	0.461848	1	1	35	odontogenesis of dentin-containing tooth	BP	ENSSSCG00000007501	BMP7
GO:0019898	0.463062	1	2	97	extrinsic component of membrane	CC	ENSSSCG00000028754,ENSSSCG00000027318	--,--
GO:0005811	0.463147	1	1	38	lipid particle	CC	ENSSSCG00000008648	RSAD2
GO:0045121	0.465432	1	2	92	membrane raft	CC	ENSSSCG00000026688,ENSSSCG00000016364	--,GPC1
GO:0032869	0.467535	1	1	32	cellular response to insulin stimulus	BP	ENSSSCG00000010537	GOT1
GO:0017124	0.467873	1	1	34	SH3 domain binding	MF	ENSSSCG00000002026	EFS
GO:0044297	0.469889	1	1	36	cell body	CC	ENSSSCG00000030368	HSP70.2
GO:0032922	0.470325	1	1	38	circadian regulation of gene expression	BP	ENSSSCG00000001912	PML
GO:0071230	0.470669	1	1	37	cellular response to amino acid stimulus	BP	ENSSSCG00000022506	--
GO:0004842	0.471459	1	5	248	ubiquitin-protein transferase activity	MF	ENSSSCG00000011521,ENSSSCG00000017146,ENSSSCG00000017148,ENSSSCG00000030548,ENSSSCG00000003350	PDZRN3,RNF213,--,--,MIB2
GO:0016567	0.477363	1	5	253	protein ubiquitination	BP	ENSSSCG00000011521,ENSSSCG00000017146,ENSSSCG00000017148,ENSSSCG00000030548,ENSSSCG00000003350	PDZRN3,RNF213,--,--,MIB2
GO:0001948	0.477621	1	1	37	glycoprotein binding	MF	ENSSSCG00000006288	SELP
GO:0019221	0.479281	1	2	128	cytokine-mediated signaling pathway	BP	ENSSSCG00000025188,ENSSSCG00000021886	--,--
GO:0001750	0.480714	1	1	34	photoreceptor outer segment	CC	ENSSSCG00000008020	IFT140
GO:0043123	0.482114	1	2	101	positive regulation of I-kappaB kinase/NF-kappaB signaling	BP	ENSSSCG00000029328,ENSSSCG00000003350	--,MIB2
GO:0008360	0.482116	1	2	91	regulation of cell shape	BP	ENSSSCG00000015399,ENSSSCG00000024500	SEMA3E,--
GO:0030141	0.484717	1	1	43	secretory granule	CC	ENSSSCG00000023032	SCG2
GO:0005518	0.485468	1	1	40	collagen binding	MF	ENSSSCG00000011683	PCOLCE2
GO:0030512	0.485907	1	1	36	negative regulation of transforming growth factor beta receptor signaling pathway	BP	ENSSSCG00000008723	HTRA3
GO:0007204	0.489666	1	1	44	positive regulation of cytosolic calcium ion concentration	BP	ENSSSCG00000017189	GALR2
GO:0030674	0.490144	1	1	37	protein binding, bridging	MF	ENSSSCG00000017192	EVPL
GO:0045860	0.493872	1	1	38	positive regulation of protein kinase activity	BP	ENSSSCG00000009565	GAS6
GO:0034613	0.493875	1	1	35	cellular protein localization	BP	ENSSSCG00000002633	--
GO:0008146	0.494272	1	1	44	sulfotransferase activity	MF	ENSSSCG00000002737	CHST4
GO:0016301	0.49463	1	6	314	kinase activity	MF	ENSSSCG00000030560,ENSSSCG00000028197,ENSSSCG00000006464,ENSSSCG00000014047,ENSSSCG00000008017,ENSSSCG00000010861	--,PFKL,NTRK1,FGFR4,NME3,COQ8A
GO:0005198	0.495318	1	3	169	structural molecule activity	MF	ENSSSCG00000017192,ENSSSCG00000017934,ENSSSCG00000010123	EVPL,--,CLDN5
GO:0007005	0.496713	1	1	38	mitochondrion organization	BP	ENSSSCG00000010682	PRDX3
GO:0008344	0.498341	1	1	40	adult locomotory behavior	BP	ENSSSCG00000027357	CSTB
GO:0016616	0.498591	1	1	44	oxidoreductase activity, acting on the CH-OH group of donors, NAD or NADP as acceptor	MF	ENSSSCG00000021767	--
GO:0042752	0.498896	1	1	37	regulation of circadian rhythm	BP	ENSSSCG00000001912	PML
GO:0016197	0.500852	1	1	42	endosomal transport	BP	ENSSSCG00000012978	AP5B1
GO:0022008	0.501897	1	1	37	neurogenesis	BP	ENSSSCG00000029189	DCHS1
GO:0019827	0.503728	1	1	40	stem cell population maintenance	BP	ENSSSCG00000005437	KLF4
GO:0042254	0.506345	1	1	43	ribosome biogenesis	BP	ENSSSCG00000005920	BOP1
GO:0045665	0.506374	1	1	38	negative regulation of neuron differentiation	BP	ENSSSCG00000007501	BMP7
GO:0019899	0.507165	1	4	200	enzyme binding	MF	ENSSSCG00000030839,ENSSSCG00000003216,ENSSSCG00000003342,ENSSSCG00000022913	JUN,POLD1,DVL1,SLPI
GO:0033138	0.508406	1	1	50	positive regulation of peptidyl-serine phosphorylation	BP	ENSSSCG00000009565	GAS6
GO:0050680	0.508544	1	1	41	negative regulation of epithelial cell proliferation	BP	ENSSSCG00000017251	SOX9
GO:0051897	0.50999	1	1	45	positive regulation of protein kinase B signaling	BP	ENSSSCG00000009565	GAS6
GO:0018105	0.510256	1	2	91	peptidyl-serine phosphorylation	BP	ENSSSCG00000008041,ENSSSCG00000009565	PKD1,GAS6
GO:0031410	0.510347	1	2	90	cytoplasmic vesicle	CC	ENSSSCG00000011643,ENSSSCG00000003342	--,DVL1
GO:0000413	0.51092	1	1	48	protein peptidyl-prolyl isomerization	BP	ENSSSCG00000024806	--
GO:0003755	0.51092	1	1	48	peptidyl-prolyl cis-trans isomerase activity	MF	ENSSSCG00000024806	--
GO:0005507	0.510969	1	1	48	copper ion binding	MF	ENSSSCG00000016364	GPC1
GO:0001755	0.515842	1	1	46	neural crest cell migration	BP	ENSSSCG00000015399	SEMA3E
GO:0007623	0.516622	1	1	44	circadian rhythm	BP	ENSSSCG00000006464	NTRK1
GO:0006469	0.516827	1	1	45	negative regulation of protein kinase activity	BP	ENSSSCG00000003342	DVL1
GO:0005819	0.519136	1	1	43	spindle	CC	ENSSSCG00000008047	E4F1
GO:0005044	0.521174	1	1	43	scavenger receptor activity	MF	ENSSSCG00000002981	DMBT1
GO:0043130	0.521178	1	1	43	ubiquitin binding	MF	ENSSSCG00000023379	UBE2L6
GO:0003690	0.521564	1	1	44	double-stranded DNA binding	MF	ENSSSCG00000030408	DDX58
GO:0046330	0.52461	1	1	45	positive regulation of JNK cascade	BP	ENSSSCG00000009585	GADD45G
GO:0005544	0.525517	1	1	46	calcium-dependent phospholipid binding	MF	ENSSSCG00000002443	TC2N
GO:0001570	0.525522	1	1	41	vasculogenesis	BP	ENSSSCG00000013735	--
GO:0045666	0.526015	1	1	44	positive regulation of neuron differentiation	BP	ENSSSCG00000007501	BMP7
GO:0070098	0.529462	1	1	60	chemokine-mediated signaling pathway	BP	ENSSSCG00000008977	CXCL10
GO:0032092	0.531031	1	1	40	positive regulation of protein binding	BP	ENSSSCG00000008041	PKD1
GO:0030036	0.531772	1	2	105	actin cytoskeleton organization	BP	ENSSSCG00000014822,ENSSSCG00000000075	--,MKL1
GO:0030326	0.531854	1	1	41	embryonic limb morphogenesis	BP	ENSSSCG00000007501	BMP7
GO:0005230	0.534979	1	1	48	extracellular ligand-gated ion channel activity	MF	ENSSSCG00000017188	ZACN
GO:0042391	0.536721	1	2	106	regulation of membrane potential	BP	ENSSSCG00000017188,ENSSSCG00000022956	ZACN,--
GO:0051965	0.537534	1	1	47	positive regulation of synapse assembly	BP	ENSSSCG00000006464	NTRK1
GO:0043025	0.538629	1	2	103	neuronal cell body	CC	ENSSSCG00000026688,ENSSSCG00000012793	--,HCFC1
GO:0001701	0.540961	1	3	151	in utero embryonic development	BP	ENSSSCG00000003702,ENSSSCG00000013735,ENSSSCG00000008041	GATA6,--,PKD1
GO:0009055	0.541582	1	1	55	electron carrier activity	MF	ENSSSCG00000029606	AOX1
GO:0061630	0.545252	1	3	160	ubiquitin protein ligase activity	MF	ENSSSCG00000011521,ENSSSCG00000030548,ENSSSCG00000003350	PDZRN3,--,MIB2
GO:0030176	0.545423	1	1	46	integral component of endoplasmic reticulum membrane	CC	ENSSSCG00000025593	--
GO:0030900	0.546006	1	1	43	forebrain development	BP	ENSSSCG00000000075	MKL1
GO:0007229	0.549202	1	1	48	integrin-mediated signaling pathway	BP	ENSSSCG00000028878	BCAR1
GO:0005488	0.551703	1	8	386	binding	MF	ENSSSCG00000008697,ENSSSCG00000000970,ENSSSCG00000005921,ENSSSCG00000007543,ENSSSCG00000007558,ENSSSCG00000030108,ENSSSCG00000017136,ENSSSCG00000023329	HTT,PPP6R2,MROH1,--,--,--,TBCD,APC2
GO:0032259	0.553223	1	2	103	methylation	BP	ENSSSCG00000022734,ENSSSCG00000030626	--,ALDH1L1
GO:0086010	0.554834	1	1	50	membrane depolarization during action potential	BP	ENSSSCG00000015913	SCN9A
GO:0030054	0.554896	1	3	168	cell junction	CC	ENSSSCG00000017934,ENSSSCG00000010123,ENSSSCG00000023483	--,CLDN5,PLXNA3
GO:0030183	0.555933	1	1	66	B cell differentiation	BP	ENSSSCG00000006464	NTRK1
GO:0006457	0.558031	1	2	123	protein folding	BP	ENSSSCG00000024806,ENSSSCG00000017136	--,TBCD
GO:0008022	0.558973	1	2	98	protein C-terminus binding	MF	ENSSSCG00000007189,ENSSSCG00000010682	SDCBP2,PRDX3
GO:0032436	0.56057	1	1	49	positive regulation of proteasomal ubiquitin-dependent protein catabolic process	BP	ENSSSCG00000003342	DVL1
GO:0072659	0.560773	1	1	46	protein localization to plasma membrane	BP	ENSSSCG00000029189	DCHS1
GO:0042733	0.561937	1	1	44	embryonic digit morphogenesis	BP	ENSSSCG00000012885	LRP5
GO:0016363	0.562708	1	1	44	nuclear matrix	CC	ENSSSCG00000001912	PML
GO:0007368	0.562931	1	1	43	determination of left/right symmetry	BP	ENSSSCG00000008020	IFT140
GO:0060326	0.563235	1	1	58	cell chemotaxis	BP	ENSSSCG00000028878	BCAR1
GO:0001933	0.563513	1	1	44	negative regulation of protein phosphorylation	BP	ENSSSCG00000003342	DVL1
GO:0001047	0.563734	1	1	43	core promoter binding	MF	ENSSSCG00000005437	KLF4
GO:0051015	0.564021	1	2	101	actin filament binding	MF	ENSSSCG00000014822,ENSSSCG00000020777	--,--
GO:0071456	0.564162	1	1	49	cellular response to hypoxia	BP	ENSSSCG00000003702	GATA6
GO:0006919	0.565681	1	1	52	activation of cysteine-type endopeptidase activity involved in apoptotic process	BP	ENSSSCG00000001912	PML
GO:0005930	0.565945	1	1	44	axoneme	CC	ENSSSCG00000008020	IFT140
GO:0003712	0.567493	1	1	45	transcription cofactor activity	MF	ENSSSCG00000016777	ZNF212
GO:0048812	0.569566	1	1	42	neuron projection morphogenesis	BP	ENSSSCG00000007501	BMP7
GO:0005643	0.570589	1	1	51	nuclear pore	CC	ENSSSCG00000012076	MX2
GO:0050877	0.573979	1	1	51	neurological system process	BP	ENSSSCG00000017188	ZACN
GO:0090305	0.577621	1	1	54	nucleic acid phosphodiester bond hydrolysis	BP	ENSSSCG00000003216	POLD1
GO:0001227	0.579127	1	1	50	transcriptional repressor activity, RNA polymerase II transcription regulatory region sequence-specific binding	MF	ENSSSCG00000001561	ETV7
GO:0030509	0.582292	1	1	49	BMP signaling pathway	BP	ENSSSCG00000007501	BMP7
GO:0007275	0.583533	1	3	194	multicellular organismal development	BP	ENSSSCG00000004859,ENSSSCG00000014825,ENSSSCG00000022410	ZNF516,RELT,--
GO:0042803	0.584758	1	7	439	protein homodimerization activity	MF	ENSSSCG00000006276,ENSSSCG00000030095,ENSSSCG00000001912,ENSSSCG00000007189,ENSSSCG00000003088,ENSSSCG00000006464,ENSSSCG00000017143	CEBPD,ZBTB16,PML,SDCBP2,APOE,NTRK1,CEP131
GO:0001726	0.585068	1	1	46	ruffle	CC	ENSSSCG00000028878	BCAR1
GO:0030097	0.586237	1	1	52	hemopoiesis	BP	ENSSSCG00000030095	ZBTB16
GO:0005245	0.587399	1	1	58	voltage-gated calcium channel activity	MF	ENSSSCG00000009565	GAS6
GO:0090263	0.590591	1	1	47	positive regulation of canonical Wnt signaling pathway	BP	ENSSSCG00000003342	DVL1
GO:0005622	0.596472	1	17	1154	intracellular	CC	ENSSSCG00000028754,ENSSSCG00000001912,ENSSSCG00000025610,ENSSSCG00000005759,ENSSSCG00000007823,ENSSSCG00000027318,ENSSSCG00000003998,ENSSSCG00000016773,ENSSSCG00000016777,ENSSSCG00000007993,ENSSSCG00000029723,ENSSSCG00000008017,ENSSSCG00000007967,ENSSSCG00000027357,ENSSSCG00000008022,ENSSSCG00000008114,ENSSSCG00000021825	--,PML,AGAP3,MRPS2,--,--,ZNF274,ZNF282,ZNF212,CAPN15,PHRF1,NME3,ZNF213,CSTB,TELO2,--,RPS21
GO:0000151	0.596863	1	1	50	ubiquitin ligase complex	CC	ENSSSCG00000003350	MIB2
GO:0030335	0.596911	1	2	118	positive regulation of cell migration	BP	ENSSSCG00000015399,ENSSSCG00000028878	SEMA3E,BCAR1
GO:0007218	0.597781	1	1	71	neuropeptide signaling pathway	BP	ENSSSCG00000017189	GALR2
GO:0043209	0.59875	1	2	129	myelin sheath	CC	ENSSSCG00000008948,ENSSSCG00000010682	ALB,PRDX3
GO:0070588	0.599171	1	2	121	calcium ion transmembrane transport	BP	ENSSSCG00000008041,ENSSSCG00000009565	PKD1,GAS6
GO:0030018	0.601961	1	1	51	Z disc	CC	ENSSSCG00000026688	--
GO:0008021	0.603882	1	1	56	synaptic vesicle	CC	ENSSSCG00000011723	MME
GO:0016874	0.606031	1	2	114	ligase activity	MF	ENSSSCG00000030548,ENSSSCG00000023379	--,UBE2L6
GO:0005681	0.606153	1	1	54	spliceosomal complex	CC	ENSSSCG00000013021	SF1
GO:0016485	0.606743	1	1	54	protein processing	BP	ENSSSCG00000014169	PCSK1
GO:0002244	0.608261	1	1	51	hematopoietic progenitor cell differentiation	BP	ENSSSCG00000006276	CEBPD
GO:0007224	0.612972	1	1	56	smoothened signaling pathway	BP	ENSSSCG00000024500	--
GO:0016023	0.612983	1	1	58	cytoplasmic membrane-bounded vesicle	CC	ENSSSCG00000003342	DVL1
GO:0006364	0.619246	1	1	60	rRNA processing	BP	ENSSSCG00000005920	BOP1
GO:0043401	0.621176	1	1	60	steroid hormone mediated signaling pathway	BP	ENSSSCG00000007501	BMP7
GO:0007601	0.62202	1	1	60	visual perception	BP	ENSSSCG00000005710	LAMC3
GO:0008283	0.623145	1	2	123	cell proliferation	BP	ENSSSCG00000005920,ENSSSCG00000023329	BOP1,APC2
GO:0016042	0.623477	1	1	58	lipid catabolic process	BP	ENSSSCG00000010023	PLA2G3
GO:0009791	0.628829	1	1	55	post-embryonic development	BP	ENSSSCG00000015913	SCN9A
GO:0003684	0.631428	1	1	54	damaged DNA binding	MF	ENSSSCG00000003216	POLD1
GO:0036064	0.631624	1	1	55	ciliary basal body	CC	ENSSSCG00000008020	IFT140
GO:0005911	0.633295	1	2	116	cell-cell junction	CC	ENSSSCG00000014047,ENSSSCG00000010123	FGFR4,CLDN5
GO:0000139	0.634354	1	2	126	Golgi membrane	CC	ENSSSCG00000002737,ENSSSCG00000014802	CHST4,NUMA1
GO:0008168	0.635051	1	2	120	methyltransferase activity	MF	ENSSSCG00000022734,ENSSSCG00000030626	--,ALDH1L1
GO:0006935	0.638306	1	1	75	chemotaxis	BP	ENSSSCG00000008977	CXCL10
GO:0016853	0.642662	1	1	68	isomerase activity	MF	ENSSSCG00000024806	--
GO:0001666	0.642726	1	1	53	response to hypoxia	BP	ENSSSCG00000001912	PML
GO:0008076	0.64577	1	1	68	voltage-gated potassium channel complex	CC	ENSSSCG00000010325	KCNMA1
GO:0030336	0.64722	1	1	54	negative regulation of cell migration	BP	ENSSSCG00000005437	KLF4
GO:0002039	0.647477	1	1	55	p53 binding	MF	ENSSSCG00000008697	HTT
GO:0005840	0.648476	1	2	208	ribosome	CC	ENSSSCG00000005759,ENSSSCG00000021825	MRPS2,RPS21
GO:0098792	0.65192	1	1	64	xenophagy	BP	ENSSSCG00000005759	MRPS2
GO:0098655	0.654825	1	1	61	cation transmembrane transport	BP	ENSSSCG00000017188	ZACN
GO:0005178	0.656612	1	1	61	integrin binding	MF	ENSSSCG00000007379	WISP2
GO:0005730	0.661796	1	8	509	nucleolus	CC	ENSSSCG00000030095,ENSSSCG00000001912,ENSSSCG00000014450,ENSSSCG00000021810,ENSSSCG00000005920,ENSSSCG00000024867,ENSSSCG00000027357,ENSSSCG00000028878	ZBTB16,PML,TCOF1,--,BOP1,ISG20,CSTB,BCAR1
GO:0007160	0.662138	1	1	58	cell-matrix adhesion	BP	ENSSSCG00000020963	--
GO:0043410	0.669432	1	1	70	positive regulation of MAPK cascade	BP	ENSSSCG00000014825	RELT
GO:0030425	0.670365	1	2	119	dendrite	CC	ENSSSCG00000008697,ENSSSCG00000011723	HTT,MME
GO:0051091	0.671179	1	1	65	positive regulation of sequence-specific DNA binding transcription factor activity	BP	ENSSSCG00000012885	LRP5
GO:0005871	0.672963	1	1	55	kinesin complex	CC	ENSSSCG00000010879	KIF26B
GO:0045766	0.673616	1	1	66	positive regulation of angiogenesis	BP	ENSSSCG00000003702	GATA6
GO:0008289	0.673901	1	1	82	lipid binding	MF	ENSSSCG00000003088	APOE
GO:0006814	0.675588	1	1	64	sodium ion transport	BP	ENSSSCG00000015913	SCN9A
GO:0006874	0.676095	1	1	65	cellular calcium ion homeostasis	BP	ENSSSCG00000003088	APOE
GO:0007267	0.676331	1	1	81	cell-cell signaling	BP	ENSSSCG00000007379	WISP2
GO:0000226	0.677108	1	1	55	microtubule cytoskeleton organization	BP	ENSSSCG00000017136	TBCD
GO:0043547	0.678241	1	5	316	positive regulation of GTPase activity	BP	ENSSSCG00000025610,ENSSSCG00000006464,ENSSSCG00000014822,ENSSSCG00000027890,ENSSSCG00000017136	AGAP3,NTRK1,--,--,TBCD
GO:0005815	0.683508	1	1	61	microtubule organizing center	CC	ENSSSCG00000017143	CEP131
GO:0007409	0.690545	1	1	66	axonogenesis	BP	ENSSSCG00000003342	DVL1
GO:0005887	0.690843	1	14	1048	integral component of plasma membrane	CC	ENSSSCG00000024712,ENSSSCG00000026688,ENSSSCG00000016620,ENSSSCG00000017189,ENSSSCG00000001873,ENSSSCG00000022956,ENSSSCG00000014825,ENSSSCG00000006982,ENSSSCG00000006464,ENSSSCG00000014047,ENSSSCG00000015913,ENSSSCG00000024018,ENSSSCG00000023483,ENSSSCG00000007115	APCDD1,--,TSPAN12,GALR2,--,--,RELT,ZDHHC2,NTRK1,FGFR4,SCN9A,SLC16A3,PLXNA3,THBD
GO:0003735	0.693509	1	2	228	structural constituent of ribosome	MF	ENSSSCG00000005759,ENSSSCG00000021825	MRPS2,RPS21
GO:0000902	0.695831	1	1	67	cell morphogenesis	BP	ENSSSCG00000030368	HSP70.2
GO:0005262	0.696447	1	1	61	calcium channel activity	MF	ENSSSCG00000008041	PKD1
GO:0000922	0.696461	1	1	60	spindle pole	CC	ENSSSCG00000014802	NUMA1
GO:0048471	0.697032	1	4	268	perinuclear region of cytoplasm	CC	ENSSSCG00000026688,ENSSSCG00000012077,ENSSSCG00000023329,ENSSSCG00000009881	--,MX1,APC2,OAS2
GO:0043161	0.699305	1	2	143	proteasome-mediated ubiquitin-dependent protein catabolic process	BP	ENSSSCG00000001912,ENSSSCG00000000774	PML,USP18
GO:0005249	0.701627	1	1	77	voltage-gated potassium channel activity	MF	ENSSSCG00000010325	KCNMA1
GO:0036459	0.705875	1	1	64	ubiquitinyl hydrolase activity	MF	ENSSSCG00000000774	USP18
GO:0000785	0.709851	1	1	72	chromatin	CC	ENSSSCG00000023045	BAHCC1
GO:0035556	0.710873	1	5	334	intracellular signal transduction	BP	ENSSSCG00000023032,ENSSSCG00000026688,ENSSSCG00000027890,ENSSSCG00000029723,ENSSSCG00000003342	SCG2,--,--,PHRF1,DVL1
GO:0031982	0.711985	1	1	71	vesicle	CC	ENSSSCG00000021289	GAK
GO:0003779	0.714304	1	3	201	actin binding	MF	ENSSSCG00000005316,ENSSSCG00000016578,ENSSSCG00000000075	TPM2,FLNC,MKL1
GO:0000165	0.722258	1	1	72	MAPK cascade	BP	ENSSSCG00000023032	SCG2
GO:0043087	0.726869	1	1	64	regulation of GTPase activity	BP	ENSSSCG00000027890	--
GO:0000978	0.738966	1	3	227	RNA polymerase II core promoter proximal region sequence-specific DNA binding	MF	ENSSSCG00000006276,ENSSSCG00000030839,ENSSSCG00000013735	CEBPD,JUN,--
GO:0004843	0.743944	1	1	72	ubiquitin-specific protease activity	MF	ENSSSCG00000000774	USP18
GO:0017137	0.746233	1	1	70	Rab GTPase binding	MF	ENSSSCG00000002633	--
GO:0035725	0.747941	1	1	77	sodium ion transmembrane transport	BP	ENSSSCG00000015913	SCN9A
GO:0006338	0.74857	1	1	78	chromatin remodeling	BP	ENSSSCG00000017251	SOX9
GO:0000398	0.752765	1	1	89	mRNA splicing, via spliceosome	BP	ENSSSCG00000013021	SF1
GO:0004386	0.756047	1	1	72	helicase activity	MF	ENSSSCG00000030408	DDX58
GO:0004197	0.761682	1	1	78	cysteine-type endopeptidase activity	MF	ENSSSCG00000000774	USP18
GO:0016323	0.763538	1	1	80	basolateral plasma membrane	CC	ENSSSCG00000008041	PKD1
GO:0005089	0.764727	1	1	76	Rho guanyl-nucleotide exchange factor activity	MF	ENSSSCG00000014822	--
GO:0016579	0.772662	1	1	79	protein deubiquitination	BP	ENSSSCG00000000774	USP18
GO:0007018	0.772903	1	1	67	microtubule-based movement	BP	ENSSSCG00000010879	KIF26B
GO:0098779	0.778328	1	1	89	mitophagy in response to mitochondrial depolarization	BP	ENSSSCG00000005759	MRPS2
GO:0005802	0.778873	1	1	82	trans-Golgi network	CC	ENSSSCG00000002737	CHST4
GO:0035023	0.779199	1	1	80	regulation of Rho protein signal transduction	BP	ENSSSCG00000014822	--
GO:0003777	0.779944	1	1	69	microtubule motor activity	MF	ENSSSCG00000010879	KIF26B
GO:0007399	0.782522	1	1	89	nervous system development	BP	ENSSSCG00000006464	NTRK1
GO:0043005	0.78679	1	2	169	neuron projection	CC	ENSSSCG00000017188,ENSSSCG00000003342	ZACN,DVL1
GO:0009986	0.790658	1	4	329	cell surface	CC	ENSSSCG00000026688,ENSSSCG00000006464,ENSSSCG00000008041,ENSSSCG00000007115	--,NTRK1,PKD1,THBD
GO:0005244	0.794447	1	1	91	voltage-gated ion channel activity	MF	ENSSSCG00000015913	SCN9A
GO:0034765	0.801026	1	1	92	regulation of ion transmembrane transport	BP	ENSSSCG00000015913	SCN9A
GO:0008017	0.801753	1	2	153	microtubule binding	MF	ENSSSCG00000010879,ENSSSCG00000023329	KIF26B,APC2
GO:0031625	0.801847	1	2	182	ubiquitin protein ligase binding	MF	ENSSSCG00000008061,ENSSSCG00000001912	TCEB2,PML
GO:0071805	0.802451	1	1	104	potassium ion transmembrane transport	BP	ENSSSCG00000010325	KCNMA1
GO:0003714	0.808051	1	1	89	transcription corepressor activity	MF	ENSSSCG00000009761	--
GO:0008234	0.81448	1	1	91	cysteine-type peptidase activity	MF	ENSSSCG00000007993	CAPN15
GO:0005925	0.815531	1	3	255	focal adhesion	CC	ENSSSCG00000011723,ENSSSCG00000016578,ENSSSCG00000028878	MME,FLNC,BCAR1
GO:0043231	0.817664	1	6	460	intracellular membrane-bounded organelle	CC	ENSSSCG00000021289,ENSSSCG00000000033,ENSSSCG00000015268,ENSSSCG00000000970,ENSSSCG00000023483,ENSSSCG00000017143	GAK,TSPO,FMO1,PPP6R2,PLXNA3,CEP131
GO:0055085	0.82221	1	7	551	transmembrane transport	BP	ENSSSCG00000026631,ENSSSCG00000029335,ENSSSCG00000022956,ENSSSCG00000015913,ENSSSCG00000024018,ENSSSCG00000025593,ENSSSCG00000001680	SLC25A6,--,--,SCN9A,SLC16A3,--,--
GO:0006412	0.825813	1	2	272	translation	BP	ENSSSCG00000005759,ENSSSCG00000021825	MRPS2,RPS21
GO:0042384	0.827863	1	1	95	cilium assembly	BP	ENSSSCG00000008020	IFT140
GO:0006813	0.828524	1	1	111	potassium ion transport	BP	ENSSSCG00000010325	KCNMA1
GO:0005215	0.83095	1	2	204	transporter activity	MF	ENSSSCG00000026631,ENSSSCG00000029335	SLC25A6,--
GO:0005813	0.831749	1	4	317	centrosome	CC	ENSSSCG00000003998,ENSSSCG00000014802,ENSSSCG00000008020,ENSSSCG00000017143	ZNF274,NUMA1,IFT140,CEP131
GO:0006915	0.835212	1	1	109	apoptotic process	BP	ENSSSCG00000029328	--
GO:0005085	0.871021	1	1	99	guanyl-nucleotide exchange factor activity	MF	ENSSSCG00000014822	--
GO:0007268	0.872404	1	1	128	synaptic transmission	BP	ENSSSCG00000029890	--
GO:0006810	0.888732	1	10	848	transport	BP	ENSSSCG00000026631,ENSSSCG00000029335,ENSSSCG00000008948,ENSSSCG00000007978,ENSSSCG00000003088,ENSSSCG00000017188,ENSSSCG00000015913,ENSSSCG00000007565,ENSSSCG00000025593,ENSSSCG00000001680	SLC25A6,--,ALB,--,APOE,ZACN,SCN9A,TTYH3,--,--
GO:0007156	0.891772	1	1	118	homophilic cell adhesion via plasma membrane adhesion molecules	BP	ENSSSCG00000029189	DCHS1
GO:0005102	0.897437	1	2	254	receptor binding	MF	ENSSSCG00000009565,ENSSSCG00000020771	GAS6,INHA
GO:0015031	0.901792	1	2	248	protein transport	BP	ENSSSCG00000025610,ENSSSCG00000014102	AGAP3,--
GO:0004672	0.902984	1	6	534	protein kinase activity	MF	ENSSSCG00000012064,ENSSSCG00000030560,ENSSSCG00000031039,ENSSSCG00000006464,ENSSSCG00000014047,ENSSSCG00000017251	--,--,CH242-138G12.1,NTRK1,FGFR4,SOX9
GO:0006629	0.905656	1	1	140	lipid metabolic process	BP	ENSSSCG00000003088	APOE
GO:0005524	0.906323	1	18	1327	ATP binding	MF	ENSSSCG00000012064,ENSSSCG00000026336,ENSSSCG00000030368,ENSSSCG00000030560,ENSSSCG00000029335,ENSSSCG00000017146,ENSSSCG00000030408,ENSSSCG00000028197,ENSSSCG00000017416,ENSSSCG00000006464,ENSSSCG00000008014,ENSSSCG00000014047,ENSSSCG00000008017,ENSSSCG00000023379,ENSSSCG00000010879,ENSSSCG00000025593,ENSSSCG00000001680,ENSSSCG00000009881	--,--,HSP70.2,--,--,RNF213,DDX58,PFKL,DHX58,NTRK1,NUBP2,FGFR4,NME3,UBE2L6,KIF26B,--,--,OAS2
GO:0007283	0.908688	1	1	148	spermatogenesis	BP	ENSSSCG00000017251	SOX9
GO:0034220	0.909573	1	1	155	ion transmembrane transport	BP	ENSSSCG00000017188	ZACN
GO:0005764	0.912275	1	1	139	lysosome	CC	ENSSSCG00000020963	--
GO:0006511	0.921521	1	1	138	ubiquitin-dependent protein catabolic process	BP	ENSSSCG00000000774	USP18
GO:0005768	0.929202	1	1	154	endosome	CC	ENSSSCG00000013244	--
GO:0016787	0.932698	1	9	811	hydrolase activity	MF	ENSSSCG00000026336,ENSSSCG00000027868,ENSSSCG00000030408,ENSSSCG00000017416,ENSSSCG00000007993,ENSSSCG00000013442,ENSSSCG00000003351,ENSSSCG00000014169,ENSSSCG00000013418	--,--,DDX58,DHX58,CAPN15,ABHD17A,MMP23B,PCSK1,CFD
GO:0006974	0.941131	1	1	148	cellular response to DNA damage stimulus	BP	ENSSSCG00000014628	APBB1
GO:0007166	0.94135	1	1	190	cell surface receptor signaling pathway	BP	ENSSSCG00000016620	TSPAN12
GO:0004713	0.94244	1	4	409	protein tyrosine kinase activity	MF	ENSSSCG00000012064,ENSSSCG00000030560,ENSSSCG00000006464,ENSSSCG00000014047	--,--,NTRK1,FGFR4
GO:0006281	0.945233	1	1	176	DNA repair	BP	ENSSSCG00000029616	FAAP100
GO:0006468	0.950559	1	6	601	protein phosphorylation	BP	ENSSSCG00000012064,ENSSSCG00000030560,ENSSSCG00000031039,ENSSSCG00000006464,ENSSSCG00000014047,ENSSSCG00000009565	--,--,CH242-138G12.1,NTRK1,FGFR4,GAS6
GO:0006811	0.951555	1	3	376	ion transport	BP	ENSSSCG00000017188,ENSSSCG00000015913,ENSSSCG00000007565	ZACN,SCN9A,TTYH3
GO:0005216	0.971054	1	1	203	ion channel activity	MF	ENSSSCG00000015913	SCN9A
GO:0044822	0.977251	1	8	855	poly(A) RNA binding	MF	ENSSSCG00000029773,ENSSSCG00000014450,ENSSSCG00000030839,ENSSSCG00000014322,ENSSSCG00000005920,ENSSSCG00000024018,ENSSSCG00000013021,ENSSSCG00000027357	HIST1H4L,TCOF1,JUN,HNRNPA0,BOP1,SLC16A3,SF1,CSTB
GO:0007264	0.982262	1	1	242	small GTPase mediated signal transduction	BP	ENSSSCG00000025610	AGAP3
GO:0004888	0.988673	1	1	337	transmembrane signaling receptor activity	MF	ENSSSCG00000007115	THBD
GO:0005886	0.998678	1	24	2703	plasma membrane	CC	ENSSSCG00000030560,ENSSSCG00000011723,ENSSSCG00000017188,ENSSSCG00000016578,ENSSSCG00000017934,ENSSSCG00000024500,ENSSSCG00000003832,ENSSSCG00000029328,ENSSSCG00000016364,ENSSSCG00000023362,ENSSSCG00000014047,ENSSSCG00000015913,ENSSSCG00000014628,ENSSSCG00000008041,ENSSSCG00000024161,ENSSSCG00000002443,ENSSSCG00000007565,ENSSSCG00000026943,ENSSSCG00000024018,ENSSSCG00000012885,ENSSSCG00000029189,…	--,MME,ZACN,FLNC,--,--,TACSTD2,--,GPC1,RHBDF2,FGFR4,SCN9A,APBB1,PKD1,SLA-7,TC2N,TTYH3,MRAP2,SLC16A3,LRP5,DCHS1,CLDN5,PLXNA3,BCAR1
GO:0016021	0.999141	1	59	5551	integral component of membrane	CC	ENSSSCG00000026631,ENSSSCG00000025188,ENSSSCG00000027173,ENSSSCG00000030560,ENSSSCG00000029335,ENSSSCG00000026688,ENSSSCG00000006288,ENSSSCG00000029463,ENSSSCG00000000033,ENSSSCG00000016620,ENSSSCG00000016451,ENSSSCG00000008675,ENSSSCG00000008857,ENSSSCG00000015268,ENSSSCG00000002471,ENSSSCG00000000964,ENSSSCG00000011723,ENSSSCG00000017188,ENSSSCG00000017189,ENSSSCG00000001873,ENSSSCG00000002863,…	SLC25A6,--,--,--,--,--,SELP,--,TSPO,TSPAN12,GIMAP1,LETM1,MSMO1,FMO1,ISG12(A),LMF2,MME,ZACN,GALR2,--,LRP3,--,--,--,TACSTD2,--,RELT,--,--,ZDHHC2,FUT2,NTRK1,RHBDF2,--,CHST4,FGFR4,SCN9A,PKD1,--,SLA-7,MARVELD1,TTYH3,MRAP2,--,SLC16A3,LRP5,DCHS1,CLDN5,PLXNA3,--,--,FAM213A,--,--,--,--,THBD,CST9L,DMBT1
GO:0007165	0.999473	1	14	2059	signal transduction	BP	ENSSSCG00000028102,ENSSSCG00000025610,ENSSSCG00000005894,ENSSSCG00000017188,ENSSSCG00000017189,ENSSSCG00000004859,ENSSSCG00000029328,ENSSSCG00000027890,ENSSSCG00000010031,ENSSSCG00000002451,ENSSSCG00000023483,ENSSSCG00000017251,ENSSSCG00000007379,ENSSSCG00000007115	TOLLIP,AGAP3,--,ZACN,GALR2,ZNF516,--,--,SFI1,--,PLXNA3,SOX9,WISP2,THBD
GO:0016020	0.999824	1	73	6640	membrane	CC	ENSSSCG00000026631,ENSSSCG00000025188,ENSSSCG00000027173,ENSSSCG00000030560,ENSSSCG00000029335,ENSSSCG00000026688,ENSSSCG00000006288,ENSSSCG00000029773,ENSSSCG00000029463,ENSSSCG00000022506,ENSSSCG00000021289,ENSSSCG00000000033,ENSSSCG00000016620,ENSSSCG00000016451,ENSSSCG00000008675,ENSSSCG00000014433,ENSSSCG00000008857,ENSSSCG00000025610,ENSSSCG00000015268,ENSSSCG00000003088,ENSSSCG00000009219,…	SLC25A6,--,--,--,--,--,SELP,HIST1H4L,--,--,GAK,TSPO,TSPAN12,GIMAP1,LETM1,PCYOX1L,MSMO1,AGAP3,FMO1,APOE,IBSP,LMF2,MME,ZACN,GALR2,--,LRP3,--,PFKL,--,--,TACSTD2,--,RELT,--,--,ZDHHC2,FUT2,NTRK1,GPC1,KCNMA1,POLD1,RHBDF2,--,FGFR4,SCN9A,PHRF1,PKD1,SORD,ABHD17A,--,SLA-7,MARVELD1,TTYH3,MRAP2,SLC16A3,LRP5,DCHS1,HCFC1,CLDN5,PLXNA3,--,PARP14,--,FAM213A,--,--,--,--,THBD,CST9L,DMBT1,OAS2
GO:0007186	0.999998	1	4	1612	G-protein coupled receptor signaling pathway	BP	ENSSSCG00000003088,ENSSSCG00000017189,ENSSSCG00000008977,ENSSSCG00000028878	APOE,GALR2,CXCL10,BCAR1
GO:0004871	1	1	2	1508	signal transducer activity	MF	ENSSSCG00000017189,ENSSSCG00000003350	GALR2,MIB2
GO:0004930	1	1	1	1492	G-protein coupled receptor activity	MF	ENSSSCG00000017189	GALR2

## Sheet: GO enrichment of DE miRNA
GO enrichment of different expressed miRNA target gene
Category	p-value	q-value	Different Expressed	Background	Term	Ontology	Different Expressed Gene ID	Gene Symbol
GO:0016020	2.1345e-11	1.38434e-07	5389	6640	membrane	CC	ENSSSCG00000023697,ENSSSCG00000021697,ENSSSCG00000023053,ENSSSCG00000028199,ENSSSCG00000021811,ENSSSCG00000027347,ENSSSCG00000025163,ENSSSCG00000026321,ENSSSCG00000007247,ENSSSCG00000027288,ENSSSCG00000024840,ENSSSCG00000024202,ENSSSCG00000003724,ENSSSCG00000029853,ENSSSCG00000020968,ENSSSCG00000024800,ENSSSCG00000002881,ENSSSCG00000028847,ENSSSCG00000029946,ENSSSCG00000024282,ENSSSCG00000010974,…	REM2,--,LRP10,--,GDPD3,--,--,--,KIF3B,DAGLB,--,--,--,--,OR4D11,DSC2,FFAR2,DSC3,OR4D10,--,CNTFR,--,--,--,--,FFAR1,OR4D6,GPR183,NPY2R,--,--,--,LRAT,--,--,OR5A2,ENHO,ADCY7,PRPF8,SLC25A6,--,OSMR,--,--,--,--,--,--,--,--,TMBIM6,DCHS2,NTPCR,--,--,--,--,--,--,--,--,--,--,--,SEMA7A,--,GPRC5A,--,PAQR4,--,--,--,--,--,--,PKMYT1,--,--,--,--,PCDH17,--,--,--,TNFRSF12A,TMEM170B,--,--,--,C4H1orf43,MYO1C,--,--,--,…
							ENSSCG00000016496,ENSSSCG00000015090,ENSSSCG00000020815,ENSSSCG00000003109,ENSSSCG00000025464,ENSSSCG00000010853,ENSSSCG00000013804,ENSSSCG00000015094,ENSSSCG00000017337,ENSSSCG00000001480,ENSSSCG00000001447,ENSSSCG00000003202,ENSSSCG00000008268,ENSSSCG00000017502,ENSSSCG00000013169,ENSSSCG00000004744,ENSSSCG00000007288,ENSSSCG00000010506,ENSSSCG00000025034,ENSSSCG00000022246,ENSSSCG00000015275,E…
							ENSSSCG0000021812,ENSSSCG00000002684,ENSSSCG00000026626,ENSSSCG00000011906,ENSSSCG00000025690,ENSSSCG00000014909,ENSSSCG00000028032,ENSSSCG00000000251,ENSSSCG00000027444,ENSSSCG00000027941,ENSSSCG00000017054,ENSSSCG00000004662,ENSSSCG00000014799,ENSSSCG00000010068,ENSSSCG00000007462,ENSSSCG00000003013,ENSSSCG00000007072,ENSSSCG00000024723,ENSSSCG00000021944,ENSSSCG00000017583,ENSSSCG00000015302,E…
							ENSSSCG0000027990,ENSSSCG00000021331,ENSSSCG00000010145,ENSSSCG00000007925,ENSSSCG00000007109,ENSSSCG00000001405,ENSSSCG00000008578,ENSSSCG00000001686,ENSSSCG00000011448,ENSSSCG00000012724,ENSSSCG00000015893,ENSSSCG00000004200,ENSSSCG00000027895,ENSSSCG00000004201,ENSSSCG00000012238,ENSSSCG00000017718,ENSSSCG00000007115,ENSSSCG00000003755,ENSSSCG00000026259,ENSSSCG00000007116,ENSSSCG00000026598,E…
GO:0016021	2.944e-11	1.38434e-07	4498	5551	integral component of membrane	CC	ENSSSCG00000021697,ENSSSCG00000023053,ENSSSCG00000021811,ENSSSCG00000027347,ENSSSCG00000026321,ENSSSCG00000027288,ENSSSCG00000024840,ENSSSCG00000024202,ENSSSCG00000024071,ENSSSCG00000003724,ENSSSCG00000029853,ENSSSCG00000020968,ENSSSCG00000024800,ENSSSCG00000002881,ENSSSCG00000028847,ENSSSCG00000029946,ENSSSCG00000024282,ENSSSCG00000006815,ENSSSCG00000009985,ENSSSCG00000002891,ENSSSCG00000024524,…	--,LRP10,GDPD3,--,--,DAGLB,--,--,SCARF1,--,--,OR4D11,DSC2,FFAR2,DSC3,OR4D10,--,--,--,--,--,--,FFAR1,OR4D6,GPR183,NPY2R,--,--,LRAT,--,OR5A2,ENHO,ADCY7,SLC25A6,--,OSMR,--,--,--,--,--,--,--,TMBIM6,DCHS2,--,--,--,--,--,--,--,--,--,--,--,GPRC5A,--,PAQR4,--,--,
							ENSSCG00000014564,ENSSSCG00000030575,ENSSSCG00000005873,ENSSSCG00000005874,ENSSSCG00000009555,ENSSSCG00000006831,ENSSSCG00000012240,ENSSSCG00000013634,ENSSSCG00000025732,ENSSSCG00000004759,ENSSSCG00000013193,ENSSSCG00000005869,ENSSSCG00000009256,ENSSSCG00000025088,ENSSSCG00000017340,ENSSSCG00000025799,ENSSSCG00000026010,ENSSSCG00000008813,ENSSSCG00000002761,ENSSSCG00000013789,ENSSSCG00000002671,E…
							ENSSSCG0000017005,ENSSSCG00000003743,ENSSSCG00000024927,ENSSSCG00000013217,ENSSSCG00000017222,ENSSSCG00000025051,ENSSSCG00000017776,ENSSSCG00000001131,ENSSSCG00000024193,ENSSSCG00000013590,ENSSSCG00000014612,ENSSSCG00000015447,ENSSSCG00000023192,ENSSSCG00000020670,ENSSSCG00000028131,ENSSSCG00000027777,ENSSSCG00000017119,ENSSSCG00000003046,ENSSSCG00000009513,ENSSSCG00000017226,ENSSSCG00000007903,E…
GO:0007186	3.26623e-11	1.38434e-07	1323	1612	G-protein coupled receptor signaling pathway	BP	ENSSSCG00000024840,ENSSSCG00000024202,ENSSSCG00000029853,ENSSSCG00000020968,ENSSSCG00000002881,ENSSSCG00000029946,ENSSSCG00000024282,ENSSSCG00000002891,ENSSSCG00000024524,ENSSSCG00000002892,ENSSSCG00000013131,ENSSSCG00000009517,ENSSSCG00000008993,ENSSSCG00000001268,ENSSSCG00000013132,ENSSSCG00000024360,ENSSSCG00000001297,ENSSSCG00000009518,ENSSSCG00000021797,ENSSSCG00000029105,ENSSSCG00000021066,…	--,--,--,OR4D11,FFAR2,OR4D10,--,--,--,FFAR1,OR4D6,GPR183,NPY2R,--,OR5A2,--,--,--,--,--,--,--,--,--,--,GPRC5A,--,--,--,--,--,--,--,--,--,--,--,--,--,--,--,PTGER4,--,DRD2,VIPR2,GPR179,ARF5,BAIAP3,--,GRM8,GNAO1,--,--,GPR37,--,EDNRA,--,--,--,--,--,--,F2RL2,--
GO:0004930	4.54416e-10	1.44447e-06	1224	1492	G-protein coupled receptor activity	MF	ENSSSCG00000024840,ENSSSCG00000024202,ENSSSCG00000029853,ENSSSCG00000020968,ENSSSCG00000002881,ENSSSCG00000029946,ENSSSCG00000024282,ENSSSCG00000002891,ENSSSCG00000024524,ENSSSCG00000002892,ENSSSCG00000013131,ENSSSCG00000009517,ENSSSCG00000008993,ENSSSCG00000001268,ENSSSCG00000013132,ENSSSCG00000024360,ENSSSCG00000001297,ENSSSCG00000009518,ENSSSCG00000021797,ENSSSCG00000029105,ENSSSCG00000021066,…	--,--,--,OR4D11,FFAR2,OR4D10,--,--,--,FFAR1,OR4D6,GPR183,NPY2R,--,OR5A2,--,--,--,--,--,--,--,--,--,--,GPRC5A,--,--,--,--,--,--,--,--,--,--,--,--,--,--,--,PTGER4,--,DRD2,VIPR2,--,GRM8,--,GPR37,--,EDNRA,--,--,--,--,--,--,F2RL2,--,OR6J1,F2R,OR6C74,F2RL1,--,-
GO:0007165	7.35096e-10	1.86935e-06	1694	2059	signal transduction	BP	ENSSSCG00000023697,ENSSSCG00000028188,ENSSSCG00000025163,ENSSSCG00000024765,ENSSSCG00000028102,ENSSSCG00000024840,ENSSSCG00000024202,ENSSSCG00000029853,ENSSSCG00000020968,ENSSSCG00000002881,ENSSSCG00000029946,ENSSSCG00000024282,ENSSSCG00000002891,ENSSSCG00000024524,ENSSSCG00000013131,ENSSSCG00000009517,ENSSSCG00000008993,ENSSSCG00000001268,ENSSSCG00000024314,ENSSSCG00000013132,ENSSSCG00000024360,…	REM2,--,--,--,TOLLIP,--,--,--,OR4D11,FFAR2,OR4D10,--,--,--,OR4D6,GPR183,NPY2R,--,--,OR5A2,--,--,--,--,--,--,--,--,--,--,--,--,--,--,--,--,--,--,--,--,--,--,--,--,--,PPP1R12B,--,--,PTGER4,--,--,--,DRD2,VIPR2,ANKDD1B,RASL12,GRM8,ARHGAP10,--,--,--,--,EDNRA,IMPA2,--,--,--,PLPPR3,--,--,F2RL2,--,OR6J1,F2R,PDE7A,OR6C74,DIRAS3,--,--,--,--,RASL11B,--,HHIP,--,--,RAB5B,--,--,--,--,TRADD,FAS,--,--,--,--,STAT…
GO:0050896	1.19996e-08	2.54292e-05	904	1111	response to stimulus	BP	ENSSSCG00000024840,ENSSSCG00000024202,ENSSSCG00000029853,ENSSSCG00000020968,ENSSSCG00000029946,ENSSSCG00000024524,ENSSSCG00000013131,ENSSSCG00000001268,ENSSSCG00000013132,ENSSSCG00000024360,ENSSSCG00000001297,ENSSSCG00000021797,ENSSSCG00000029105,ENSSSCG00000021066,ENSSSCG00000023629,ENSSSCG00000024557,ENSSSCG00000013139,ENSSSCG00000030100,ENSSSCG00000024582,ENSSSCG00000025636,ENSSSCG00000029523,…	--,--,--,OR4D11,OR4D10,--,OR4D6,--,OR5A2,--,--,--,--,--,--,--,--,--,--,--,--,--,--,--,--,--,--,--,--,--,--,--,--,--,--,--,--,--,--,OR6J1,OR6C74,--,--,--,--,--,--,--,--,--,--,--,--,--,--,--,--,--,--,--,--,--,--,--,--,--,--,--,--,OR5B21,OR2B2,CH242-73D9.1,-
GO:0005886	1.946e-08	3.22574e-05	2216	2703	plasma membrane	CC	ENSSSCG00000025243,ENSSSCG00000024765,ENSSSCG00000027288,ENSSSCG00000024840,ENSSSCG00000024202,ENSSSCG00000003724,ENSSSCG00000029853,ENSSSCG00000020968,ENSSSCG00000024800,ENSSSCG00000002881,ENSSSCG00000028847,ENSSSCG00000029946,ENSSSCG00000024524,ENSSSCG00000002892,ENSSSCG00000013131,ENSSSCG00000009517,ENSSSCG00000001268,ENSSSCG00000013132,ENSSSCG00000021707,ENSSSCG00000024360,ENSSSCG00000001297,…	SGIP1,--,DAGLB,--,--,--,--,OR4D11,DSC2,FFAR2,DSC3,OR4D10,--,FFAR1,OR4D6,GPR183,--,OR5A2,ADCY7,--,--,--,--,--,--,DCHS2,--,--,DAB2,LANCL2,--,--,SEMA7A,GPRC5A,--,--,--,--,--,--,--,--,--,PCDH17,--,C9,PDYN,TNFRSF12A,--,--,PPP1R12B,MYO1C,--,--,CLDN6,--,ALPL,SYT2,SNAP29,--,DRD2,VIPR2,ARSA,SHANK3,GPR179,ARF5,--,HMGCS1,MMP25,GCC1,GRM8,SLC51B,--,AQP3,MTM1,--,MISP,GPR37,--,--,--,--,--,--,WLS,KCNJ16,--,--,MT…
							ENSSCG00000001457,ENSSSCG00000024206,ENSSSCG00000011108,ENSSSCG00000026943,ENSSSCG00000025232,ENSSSCG00000014637,ENSSSCG00000030598,ENSSSCG00000013428,ENSSSCG00000013120,ENSSSCG00000023151,ENSSSCG00000013121,ENSSSCG00000013891,ENSSSCG00000014379,ENSSSCG00000014638,ENSSSCG00000012884,ENSSSCG00000007906,ENSSSCG00000010246,ENSSSCG00000030478,ENSSSCG00000015885,ENSSSCG00000025074,ENSSSCG00000021070,E…
GO:0004871	2.02956e-08	3.22574e-05	1228	1508	signal transducer activity	MF	ENSSSCG00000024840,ENSSSCG00000024202,ENSSSCG00000029853,ENSSSCG00000020968,ENSSSCG00000002881,ENSSSCG00000029946,ENSSSCG00000024282,ENSSSCG00000002891,ENSSSCG00000024524,ENSSSCG00000013131,ENSSSCG00000009517,ENSSSCG00000008993,ENSSSCG00000001268,ENSSSCG00000013132,ENSSSCG00000024360,ENSSSCG00000001297,ENSSSCG00000009518,ENSSSCG00000021797,ENSSSCG00000029105,ENSSSCG00000021066,ENSSSCG00000023629,…	--,--,--,OR4D11,FFAR2,OR4D10,--,--,--,OR4D6,GPR183,NPY2R,--,OR5A2,--,--,--,--,--,--,--,--,--,--,--,--,--,--,--,--,--,--,--,--,--,--,--,--,PTGER4,--,DRD2,VIPR2,ARF5,--,GRM8,GNAO1,--,--,--,--,EDNRA,--,--,--,--,--,F2RL2,--,OR6J1,F2R,OR6C74,--,--,--,--,--,--,
GO:0050911	5.55513e-08	7.66316e-05	895	1105	detection of chemical stimulus involved in sensory perception of smell	BP	ENSSSCG00000024840,ENSSSCG00000024202,ENSSSCG00000029853,ENSSSCG00000020968,ENSSSCG00000029946,ENSSSCG00000024524,ENSSSCG00000013131,ENSSSCG00000001268,ENSSSCG00000013132,ENSSSCG00000024360,ENSSSCG00000001297,ENSSSCG00000021797,ENSSSCG00000029105,ENSSSCG00000021066,ENSSSCG00000023629,ENSSSCG00000024557,ENSSSCG00000013139,ENSSSCG00000030100,ENSSSCG00000024582,ENSSSCG00000025636,ENSSSCG00000024921,…	--,--,--,OR4D11,OR4D10,--,OR4D6,--,OR5A2,--,--,--,--,--,--,--,--,--,--,--,--,--,--,--,--,--,--,--,--,--,--,--,--,--,--,--,--,--,OR6J1,OR6C74,--,--,--,--,--,--,--,--,--,--,--,--,--,--,--,--,--,--,--,--,--,--,--,--,--,--,--,--,OR5B21,OR2B2,CH242-73D9.1,--,-
GO:0004984	6.02687e-08	7.66316e-05	894	1104	olfactory receptor activity	MF	ENSSSCG00000024840,ENSSSCG00000024202,ENSSSCG00000029853,ENSSSCG00000020968,ENSSSCG00000029946,ENSSSCG00000024524,ENSSSCG00000013131,ENSSSCG00000001268,ENSSSCG00000013132,ENSSSCG00000024360,ENSSSCG00000001297,ENSSSCG00000021797,ENSSSCG00000029105,ENSSSCG00000021066,ENSSSCG00000023629,ENSSSCG00000024557,ENSSSCG00000013139,ENSSSCG00000030100,ENSSSCG00000024582,ENSSSCG00000025636,ENSSSCG00000024921,…	--,--,--,OR4D11,OR4D10,--,OR4D6,--,OR5A2,--,--,--,--,--,--,--,--,--,--,--,--,--,--,--,--,--,--,--,--,--,--,--,--,--,--,--,--,--,OR6J1,OR6C74,--,--,--,--,--,--,--,--,--,--,--,--,--,--,--,--,--,--,--,--,--,--,--,--,--,--,--,--,OR5B21,OR2B2,CH242-73D9.1,--,-
GO:0007608	1.16104e-07	0.000134205	901	1114	sensory perception of smell	BP	ENSSSCG00000024840,ENSSSCG00000024202,ENSSSCG00000029853,ENSSSCG00000020968,ENSSSCG00000029946,ENSSSCG00000024524,ENSSSCG00000013131,ENSSSCG00000001268,ENSSSCG00000013132,ENSSSCG00000024360,ENSSSCG00000001297,ENSSSCG00000021797,ENSSSCG00000029105,ENSSSCG00000021066,ENSSSCG00000023629,ENSSSCG00000024557,ENSSSCG00000013139,ENSSSCG00000030100,ENSSSCG00000024582,ENSSSCG00000025636,ENSSSCG00000024921,…	--,--,--,OR4D11,OR4D10,--,OR4D6,--,OR5A2,--,--,--,--,--,--,--,--,--,--,--,--,--,--,--,--,--,--,--,--,--,--,DRD2,--,--,--,--,--,--,--,--,OR6J1,OR6C74,--,--,--,--,--,--,--,--,--,--,--,--,--,--,--,--,--,--,--,--,--,--,--,--,--,--,--,--,OR5B21,OR2B2,CH242-73D
GO:0003677	1.63605e-07	0.000173354	950	1121	DNA binding	MF	ENSSSCG00000006276,ENSSSCG00000022304,ENSSSCG00000030473,ENSSSCG00000021932,ENSSSCG00000021780,ENSSSCG00000022683,ENSSSCG00000022755,ENSSSCG00000023682,ENSSSCG00000014082,ENSSSCG00000025053,ENSSSCG00000029194,ENSSSCG00000012732,ENSSSCG00000001164,ENSSSCG00000027195,ENSSSCG00000012734,ENSSSCG00000011408,ENSSSCG00000016591,ENSSSCG00000004815,ENSSSCG00000017822,ENSSSCG00000022823,ENSSSCG00000016410,…	CEBPD,--,--,FOXB1,--,TBP,--,--,POLK,--,--,--,--,--,--,ZMYND10,PAX4,--,--,--,MNX1,NR3C2,--,--,SREBF2,--,--,--,POLDIP2,--,ETV2,PPARGC1A,--,HIST1H2BH,EN2,--,--,--,--,--,--,--,--,HIST1H2BC,GSX2,--,KDM5B,KMT2B,STAT1,--,HIST1H4L,NFIX,MIER2,--,FOXN1,HIST1H2BN,POLR3K,SOX2,ZBED3,--,NFE2,RBPJ,ISL1,--,TP63,CREB3L2,HOXD9,HIST1H1B,ERG,--,--,--,ZBTB17,PRRX2,IRX6,HIST1H3E,HOXD8,ETV5,SPRTN,IRX3,HOXD4,--,--,HOXD3…
GO:0043565	4.52921e-07	0.000442991	421	479	sequence-specific DNA binding	MF	ENSSSCG00000027186,ENSSSCG00000006276,ENSSSCG00000022304,ENSSSCG00000029375,ENSSSCG00000021932,ENSSSCG00000021780,ENSSSCG00000029194,ENSSSCG00000012732,ENSSSCG00000027648,ENSSSCG00000012734,ENSSSCG00000016591,ENSSSCG00000016410,ENSSSCG00000024987,ENSSSCG00000029641,ENSSSCG00000009034,ENSSSCG00000026015,ENSSSCG00000002906,ENSSSCG00000029275,ENSSSCG00000016419,ENSSSCG00000024394,ENSSSCG00000008840,…	--,CEBPD,--,ZNF205,FOXB1,--,--,--,TRPS1,--,PAX4,MNX1,NR3C2,ZSCAN10,--,--,ETV2,PPARGC1A,EN2,IKZF4,GSX2,FOXN1,SOX2,--,NFE2,RBPJ,ISL1,TP63,CREB3L2,HOXD9,ERG,--,--,PRRX2,IRX6,HOXD8,ETV5,IRX3,HOXD4,HOXD3,--,ZGPAT,DRGX,ETV6,OTP,HOXD1,SMAD3,SALL2,SALL1,ETV1,WHSC
GO:0000786	4.27374e-06	0.00388147	66	78	nucleosome	CC	ENSSSCG00000025957,ENSSSCG00000020991,ENSSSCG00000024918,ENSSSCG00000021860,ENSSSCG00000030071,ENSSSCG00000026668,ENSSSCG00000022049,ENSSSCG00000029773,ENSSSCG00000023360,ENSSSCG00000026930,ENSSSCG00000020971,ENSSSCG00000030023,ENSSSCG00000001177,ENSSSCG00000027435,ENSSSCG00000022537,ENSSSCG00000016738,ENSSSCG00000022571,ENSSSCG00000016440,ENSSSCG00000001032,ENSSSCG00000021101,ENSSSCG00000014307,…	HIST1H2BH,--,--,--,--,HIST1H2BC,--,HIST1H4L,--,HIST1H2BN,--,HIST1H1B,--,HIST1H3E,--,H2AFZ,--,--,--,--,H2AFY,H1FX,--,H2AFX,PRM1,SHPRH,HP1BP3,TNP2,--,--,HIST2H2AA3,--,KAT6B,--,--,--,--,--,--,HIST2H2AB,--,H3F3A,--,TNP1,--,HIST1H2AA,HIST1H2BA,HIST2H2BF,--,--,HIST2H2BE,--,--,HIST2H2AA4,--,HILS1,--,CENPA,--,--,HIST1H3E,--,--,--,--,--
GO:0015031	1.5255e-05	0.0121778	220	248	protein transport	BP	ENSSSCG00000025163,ENSSSCG00000025932,ENSSSCG00000026239,ENSSSCG00000024434,ENSSSCG00000016593,ENSSSCG00000004924,ENSSSCG00000021346,ENSSSCG00000021347,ENSSSCG00000003797,ENSSSCG00000008835,ENSSSCG00000021660,ENSSSCG00000029828,ENSSSCG00000025041,ENSSSCG00000022596,ENSSSCG00000000290,ENSSSCG00000024839,ENSSSCG00000029330,ENSSSCG00000015384,ENSSSCG00000014101,ENSSSCG00000016544,ENSSSCG00000010306,…	--,AP1S3,VPS35,AP2B1,ARF5,RASL12,--,--,DIRAS3,RASL11B,--,RAB5B,--,--,COPZ1,--,--,TOMM7,--,--,SEC24C,--,--,--,RAB9B,SCAMP1,SAR1B,AGAP3,MIA3,RAB2B,KDELR2,SEC24A,COPG2,HRAS,--,--,--,COG2,--,RAB8B,RHOH,REM1,RAB4A,BIRC6,--,ATG4C,RAP2B,RAB3C,--,AP1M1,AP2M1,RAB2
GO:0007275	1.59734e-05	0.0121778	175	194	multicellular organismal development	BP	ENSSSCG00000009004,ENSSSCG00000016591,ENSSSCG00000016419,ENSSSCG00000017836,ENSSSCG00000023417,ENSSSCG00000014445,ENSSSCG00000005680,ENSSSCG00000015983,ENSSSCG00000016617,ENSSSCG00000015984,ENSSSCG00000015985,ENSSSCG00000010390,ENSSSCG00000027227,ENSSSCG00000025270,ENSSSCG00000022705,ENSSSCG00000010428,ENSSSCG00000007171,ENSSSCG00000024393,ENSSSCG00000016628,ENSSSCG00000005716,ENSSSCG00000014397,…	SFRP2,PAX4,EN2,PAFAH1B1,--,--,PRRX2,HOXD8,WNT16,HOXD4,HOXD3,DRGX,--,CHRD,SALL2,DKK1,EBF4,B3GNT5,WNT2,POMT1,SPRY4,WNT9B,SDF2,SPRY1,PAX8,SIAH2,PITX3,MYOG,MYF6,NEUROD4,--,SMO,TNFRSF9,PAX2,TPI1,DLL1,HOPX,DMBX1,POMT2,NEUROD1,CDX2,--,--,PAX9,--,PRM1,--,--,--,TNP2,--,CRX,MED1,HOXC6,DLL4,PAQR7,STMN1,CH242-363D24.1,--,OTX2,HOXC4,--,--,HIVEP2,--,VSX2,FZD10,SPRY2,RELT,--,ANGPTL4,--,EN1,DKK2,SPRED1,HOXA11,--…
GO:0006355	1.66756e-05	0.0121778	979	1161	regulation of transcription, DNA-templated	BP	ENSSSCG00000024333,ENSSSCG00000006276,ENSSSCG00000028059,ENSSSCG00000022304,ENSSSCG00000029375,ENSSSCG00000021932,ENSSSCG00000021780,ENSSSCG00000022755,ENSSSCG00000029493,ENSSSCG00000023704,ENSSSCG00000001156,ENSSSCG00000025596,ENSSSCG00000029194,ENSSSCG00000017756,ENSSSCG00000012732,ENSSSCG00000001164,ENSSSCG00000027195,ENSSSCG00000027648,ENSSSCG00000020933,ENSSSCG00000012734,ENSSSCG00000027924,…	--,CEBPD,--,--,ZNF205,FOXB1,--,--,--,--,ZNF322,PERM1,--,--,--,--,--,TRPS1,--,--,--,ZNF684,PAX4,--,MNX1,NR3C2,--,--,--,SREBF2,ZSCAN10,--,--,--,ETV2,--,PPARGC1A,--,--,--,--,EN2,--,--,ZNF2,--,--,GSX2,STAT1,--,NFIX,FOXN1,SOX2,--,NFE2,RBPJ,ISL1,RPS6KA5,PDE8B,T
GO:0005198	1.73131e-05	0.0121778	154	169	structural molecule activity	MF	ENSSSCG00000023989,ENSSSCG00000023743,ENSSSCG00000015051,ENSSSCG00000008692,ENSSSCG00000001025,ENSSSCG00000024788,ENSSSCG00000000195,ENSSSCG00000022115,ENSSSCG00000029525,ENSSSCG00000016553,ENSSSCG00000016634,ENSSSCG00000030344,ENSSSCG00000029423,ENSSSCG00000021600,ENSSSCG00000008886,ENSSSCG00000006496,ENSSSCG00000011616,ENSSSCG00000012571,ENSSSCG00000010313,ENSSSCG00000006638,ENSSSCG00000017450,…	--,CLDN6,CLDN25,ADD1,DSP,CLDN16,PRPH,--,--,COPG2,CAV1,CLDN19,--,--,--,LMNA,--,COL4A6,VCL,CDC42SE1,KRTAP3-1,SYNC,VIM,KRT25,KRT82,EVPL,KRT26,KRT27,--,KRT28,BVES,--,--,KRT75,--,GFAP,--,KRT12,--,CLDN11,CDC42SE2,SNTA1,CLDN17,--,CLDN15,CLDN23,PSMD13,KRT23,CLDN8
GO:0050907	1.81972e-05	0.0121778	245	290	detection of chemical stimulus involved in sensory perception	BP	ENSSSCG00000020968,ENSSSCG00000029946,ENSSSCG00000024524,ENSSSCG00000013131,ENSSSCG00000028667,ENSSSCG00000029320,ENSSSCG00000030132,ENSSSCG00000021737,ENSSSCG00000022267,ENSSSCG00000002105,ENSSSCG00000002106,ENSSSCG00000028621,ENSSSCG00000030532,ENSSSCG00000025617,ENSSSCG00000002565,ENSSSCG00000025832,ENSSSCG00000027054,ENSSSCG00000002572,ENSSSCG00000025360,ENSSSCG00000025077,ENSSSCG00000024251,…	OR4D11,OR4D10,--,OR4D6,--,--,CH242-73D9.1,--,CU571372.2,--,OR4E2,--,--,--,--,--,--,--,--,--,--,--,--,--,--,--,--,--,--,--,OR1I1,--,--,--,--,--,--,--,--,--,--,--,--,--,--,--,--,--,--,--,--,--,--,--,--,--,--,--,--,--,--,--,--,--,--,--,--,--,--,--,--,--,--,--,--,--,--,--,--,--,--,--,--,--,--,--,OR10J3,--,OR10J1,OR3A2,--,--,--,--,--,--,--,--,OR1N1,--,--,--,OR1N2,--,--,OR1M1,--,--,--,--,--,CU468857.10…
GO:0071805	6.51909e-05	0.0414451	97	104	potassium ion transmembrane transport	BP	ENSSSCG00000010163,ENSSSCG00000017252,ENSSSCG00000027370,ENSSSCG00000021416,ENSSSCG00000025354,ENSSSCG00000022368,ENSSSCG00000023480,ENSSSCG00000026197,ENSSSCG00000016621,ENSSSCG00000016448,ENSSSCG00000027464,ENSSSCG00000027437,ENSSSCG00000000203,ENSSSCG00000013031,ENSSSCG00000023744,ENSSSCG00000013330,ENSSSCG00000005762,ENSSSCG00000028284,ENSSSCG00000027727,ENSSSCG00000010552,ENSSSCG00000005780,…	KCNK1,KCNJ2,--,--,KCNA10,KCNS3,KCNA2,--,--,--,--,HCN2,--,KCNK4,--,--,KCNT1,KCND1,--,PKD2L1,--,--,HCN4,--,--,KCNG3,KCNH6,--,--,KCNH4,--,--,HCN3,CNGB3,--,KCNK13,KCNQ4,KCNU1,KCNA3,TMEM175,KCNAB1,KCNC3,--,--,--,KCNE5,KCNAB3,--,--,KCNK6,KCNIP2,KCNMA1,--,--,KCNK12,--,--,KCNE4,--,--,KCNB1,--,KCNK10,KCNA5,KCNA1,KCNA6,--,KCNG1,KCNE2,--,KCNV2,CNGA4,KCNQ5,KCNMB1,KCNN1,CNGA2,KCNE3,KCNC1,KCNA7,KCNT2,KCNN4,CNG…
GO:0003700	9.52034e-05	0.0576434	644	753	transcription factor activity, sequence-specific DNA binding	MF	ENSSSCG00000027186,ENSSSCG00000024333,ENSSSCG00000006276,ENSSSCG00000028059,ENSSSCG00000029375,ENSSSCG00000021932,ENSSSCG00000022755,ENSSSCG00000023704,ENSSSCG00000001156,ENSSSCG00000029194,ENSSSCG00000012732,ENSSSCG00000001164,ENSSSCG00000027648,ENSSSCG00000012734,ENSSSCG00000027924,ENSSSCG00000016410,ENSSSCG00000024987,ENSSSCG00000022485,ENSSSCG00000026092,ENSSSCG00000029641,ENSSSCG00000009034,…	--,--,CEBPD,--,ZNF205,FOXB1,--,--,ZNF322,--,--,--,TRPS1,--,--,MNX1,NR3C2,--,SREBF2,ZSCAN10,--,--,ETV2,--,--,TWIST1,IKZF4,--,ZNF2,--,--,KLF11,STAT1,NFIX,FOXN1,SOX2,--,NFE2,RBPJ,TP63,CREB3L2,HOXD9,ERG,--,--,ZBTB17,HOXD8,ETV5,HOXD4,HOXD3,--,ZGPAT,--,ETV6,PHL
GO:0033141	0.000113981	0.0658761	36	40	positive regulation of peptidyl-serine phosphorylation of STAT protein	BP	ENSSSCG00000009996,ENSSSCG00000000481,ENSSSCG00000011011,ENSSSCG00000029085,ENSSSCG00000030721,ENSSSCG00000030966,ENSSSCG00000026777,ENSSSCG00000023524,ENSSSCG00000026337,ENSSSCG00000028392,ENSSSCG00000022426,ENSSSCG00000005149,ENSSSCG00000027162,ENSSSCG00000028296,ENSSSCG00000025036,ENSSSCG00000028884,ENSSSCG00000025026,ENSSSCG00000030929,ENSSSCG00000030985,ENSSSCG00000005152,ENSSSCG00000021011,…	LIF,IFNG,IFNK,CH242-81E23.2-001,CH242-81E23.3,IFN-ALPHA-2,IFN-OMEGA-3,IFN-ALPHA-10,IFN-DELTA-6,IFN-OMEGA-7,IFN-ALPHA-17,IFN-DELTA-1,--,--,--,IFN-OMEGA-2,IFN-ALPHA-8,IFN-DELTA-5,IFN-ALPHA-5,IFN-DELTA-2,IFN-ALPHA-11,IFN-ALPHA-15,IFN-DELTA-9,IFN-ALPHA-16,IFN-ALPHA-14,IFN-DELTA-10,IFN-OMEGA-5,IFN-OMEGA-6,IFN-DELTA-11,IFNA1,IFN-DELTA-4,IFN-ALPHA-13,--,--,--,IFNB1
GO:0002323	0.000163013	0.0901178	35	39	natural killer cell activation involved in immune response	BP	ENSSSCG00000011011,ENSSSCG00000029085,ENSSSCG00000030721,ENSSSCG00000030966,ENSSSCG00000026777,ENSSSCG00000023524,ENSSSCG00000026337,ENSSSCG00000028392,ENSSSCG00000022426,ENSSSCG00000005149,ENSSSCG00000027162,ENSSSCG00000028296,ENSSSCG00000025036,ENSSSCG00000028884,ENSSSCG00000025026,ENSSSCG00000030929,ENSSSCG00000030985,ENSSSCG00000005152,ENSSSCG00000021011,ENSSSCG00000027736,ENSSSCG00000030751,…	IFNK,CH242-81E23.2-001,CH242-81E23.3,IFN-ALPHA-2,IFN-OMEGA-3,IFN-ALPHA-10,IFN-DELTA-6,IFN-OMEGA-7,IFN-ALPHA-17,IFN-DELTA-1,--,--,--,IFN-OMEGA-2,IFN-ALPHA-8,IFN-DELTA-5,IFN-ALPHA-5,IFN-DELTA-2,IFN-ALPHA-11,IFN-ALPHA-15,IFN-DELTA-9,IFN-ALPHA-16,IFN-ALPHA-14,IFN-DELTA-10,IFN-OMEGA-5,IFN-OMEGA-6,IFN-DELTA-11,IFNA1,IFN-DELTA-4,IFN-ALPHA-13,--,--,--,IFNB1,CD244
GO:0005132	0.000172926	0.0916147	34	38	type I interferon receptor binding	MF	ENSSSCG00000011011,ENSSSCG00000029085,ENSSSCG00000030721,ENSSSCG00000030966,ENSSSCG00000026777,ENSSSCG00000023524,ENSSSCG00000026337,ENSSSCG00000028392,ENSSSCG00000022426,ENSSSCG00000005149,ENSSSCG00000027162,ENSSSCG00000028296,ENSSSCG00000025036,ENSSSCG00000028884,ENSSSCG00000025026,ENSSSCG00000030929,ENSSSCG00000030985,ENSSSCG00000005152,ENSSSCG00000021011,ENSSSCG00000027736,ENSSSCG00000030751,…	IFNK,CH242-81E23.2-001,CH242-81E23.3,IFN-ALPHA-2,IFN-OMEGA-3,IFN-ALPHA-10,IFN-DELTA-6,IFN-OMEGA-7,IFN-ALPHA-17,IFN-DELTA-1,--,--,--,IFN-OMEGA-2,IFN-ALPHA-8,IFN-DELTA-5,IFN-ALPHA-5,IFN-DELTA-2,IFN-ALPHA-11,IFN-ALPHA-15,IFN-DELTA-9,IFN-ALPHA-16,IFN-ALPHA-14,IFN-DELTA-10,IFN-OMEGA-5,IFN-OMEGA-6,IFN-DELTA-11,IFNA1,IFN-DELTA-4,IFN-ALPHA-13,--,--,--,IFNB1
GO:0042100	0.000216481	0.110102	45	50	B cell proliferation	BP	ENSSSCG00000005706,ENSSSCG00000003973,ENSSSCG00000005358,ENSSSCG00000016832,ENSSSCG00000009148,ENSSSCG00000023503,ENSSSCG00000028674,ENSSSCG00000004895,ENSSSCG00000011011,ENSSSCG00000014149,ENSSSCG00000030172,ENSSSCG00000029085,ENSSSCG00000030721,ENSSSCG00000030966,ENSSSCG00000026777,ENSSSCG00000023524,ENSSSCG00000026337,ENSSSCG00000028392,ENSSSCG00000022426,ENSSSCG00000005149,ENSSSCG00000027162,…	ABL1,CTPS1,--,IL7R,LEF1,PRKCD,CR2,BCL2,IFNK,MEF2C,CD40LG,CH242-81E23.2-001,CH242-81E23.3,IFN-ALPHA-2,IFN-OMEGA-3,IFN-ALPHA-10,IFN-DELTA-6,IFN-OMEGA-7,IFN-ALPHA-17,IFN-DELTA-1,--,--,--,IFN-OMEGA-2,IFN-ALPHA-8,IFN-DELTA-5,IFN-ALPHA-5,IFN-DELTA-2,IFN-ALPHA-11,IFN-ALPHA-15,IFN-DELTA-9,IFN-ALPHA-16,IFN-ALPHA-14,IFN-DELTA-10,IFN-OMEGA-5,IFN-OMEGA-6,IFN-DELTA-11,IFNA1,IFN-DELTA-4,IFN-ALPHA-13,--,--,--,I…
GO:0004888	0.000237944	0.116364	284	337	transmembrane signaling receptor activity	MF	ENSSSCG00000020968,ENSSSCG00000029946,ENSSSCG00000024524,ENSSSCG00000013131,ENSSSCG00000016403,ENSSSCG00000010448,ENSSSCG00000015320,ENSSSCG00000025432,ENSSSCG00000028667,ENSSSCG00000029320,ENSSSCG00000030132,ENSSSCG00000021737,ENSSSCG00000022267,ENSSSCG00000002105,ENSSSCG00000002106,ENSSSCG00000028621,ENSSSCG00000030532,ENSSSCG00000002565,ENSSSCG00000025832,ENSSSCG00000002572,ENSSSCG00000025077,…	OR4D11,OR4D10,--,OR4D6,VIPR2,FAS,CALCR,--,--,--,CH242-73D9.1,--,CU571372.2,--,OR4E2,--,--,--,--,--,--,--,--,--,--,--,TLR6,--,--,--,OR1I1,--,--,--,--,--,--,--,--,--,--,--,--,--,--,--,--,--,--,--,--,--,CD79B,SMO,--,--,--,--,--,CD3E,--,--,--,--,--,--,--,--,--,--,--,--,--,CD3D,--,--,--,--,--,GHRHR,--,--,--,CD3G,--,--,ADGRA2,EMR2,--,OR10J3,OR10J1,ANTXR1,VIPR1,--,--,--,OR1N1,--,OR1N2,--,ADGRG2,--,--,--…
GO:0005267	0.000501459	0.23615	53	55	potassium channel activity	MF	ENSSSCG00000010163,ENSSSCG00000027370,ENSSSCG00000025354,ENSSSCG00000022368,ENSSSCG00000023480,ENSSSCG00000016621,ENSSSCG00000027464,ENSSSCG00000013031,ENSSSCG00000013330,ENSSSCG00000028284,ENSSSCG00000009217,ENSSSCG00000027727,ENSSSCG00000005780,ENSSSCG00000005953,ENSSSCG00000008465,ENSSSCG00000029011,ENSSSCG00000002432,ENSSSCG00000003975,ENSSSCG00000006802,ENSSSCG00000003214,ENSSSCG00000030446,…	KCNK1,--,KCNA10,KCNS3,KCNA2,--,--,KCNK4,--,KCND1,PKD2,--,--,--,KCNG3,--,KCNK13,KCNQ4,KCNA3,KCNC3,--,--,--,KCNK6,--,--,KCNK12,--,--,--,--,KCNB1,KCNK10,KCNA5,KCNA1,KCNA6,KCNG1,KCNV2,KCNQ5,--,KCNC1,KCNA7,KCNN4,--,--,--,ABCC8,KCNJ10,KCNK15,KCNS1,KCNK5,KCNK17,KCNV1
GO:0030183	0.000542251	0.24624	59	66	B cell differentiation	BP	ENSSSCG00000022155,ENSSSCG00000022593,ENSSSCG00000011996,ENSSSCG00000000068,ENSSSCG00000016755,ENSSSCG00000010472,ENSSSCG00000006156,ENSSSCG00000012915,ENSSSCG00000002867,ENSSSCG00000016205,ENSSSCG00000013743,ENSSSCG00000013888,ENSSSCG00000004616,ENSSSCG00000028674,ENSSSCG00000006464,ENSSSCG00000004895,ENSSSCG00000011011,ENSSSCG00000030172,ENSSSCG00000006106,ENSSSCG00000029085,ENSSSCG00000030721,…	RBPJ,TSHR,POU1F1,EP300,POLM,HHEX,TPD52,CLCF1,CEBPG,NHEJ1,--,JAK3,ONECUT1,CR2,NTRK1,BCL2,IFNK,CD40LG,CDH17,CH242-81E23.2-001,CH242-81E23.3,IFN-ALPHA-2,IFN-OMEGA-3,IFN-ALPHA-10,IFN-DELTA-6,IFN-OMEGA-7,IFN-ALPHA-17,IFN-DELTA-1,--,--,--,IFN-OMEGA-2,IFN-ALPHA-8,NKX2-3,FZD9,IFN-DELTA-5,IFN-ALPHA-5,IFN-DELTA-2,IFN-ALPHA-11,ADGRG3,IFN-ALPHA-15,IFN-DELTA-9,IFN-ALPHA-16,IFN-ALPHA-14,IFN-DELTA-10,IFN-OMEGA-…
GO:0000788	0.000570735	0.250238	23	25	nuclear nucleosome	CC	ENSSSCG00000025957,ENSSSCG00000026668,ENSSSCG00000026930,ENSSSCG00000027435,ENSSSCG00000022571,ENSSSCG00000016440,ENSSSCG00000021101,ENSSSCG00000016977,ENSSSCG00000024639,ENSSSCG00000026588,ENSSSCG00000027879,ENSSSCG00000009969,ENSSSCG00000029490,ENSSSCG00000009570,ENSSSCG00000023900,ENSSSCG00000022644,ENSSSCG00000024116,ENSSSCG00000027096,ENSSSCG00000023770,ENSSSCG00000022944,ENSSSCG00000026757,…	HIST1H2BH,HIST1H2BC,HIST1H2BN,HIST1H3E,--,--,--,--,--,--,--,--,--,MPHOSPH8,HIST1H2BA,HIST2H2BF,HIST2H2BE,--,--,--,--,HIST1H3E,--
GO:0045095	0.000617956	0.26191	37	38	keratin filament	CC	ENSSSCG00000014435,ENSSSCG00000017450,ENSSSCG00000017451,ENSSSCG00000000235,ENSSSCG00000000236,ENSSSCG00000017197,ENSSSCG00000000248,ENSSSCG00000021804,ENSSSCG00000026422,ENSSSCG00000028768,ENSSSCG00000025793,ENSSSCG00000020673,ENSSSCG00000029038,ENSSSCG00000000247,ENSSSCG00000028334,ENSSSCG00000000250,ENSSSCG00000000251,ENSSSCG00000000241,ENSSSCG00000000240,ENSSSCG00000024092,ENSSSCG00000024474,…	CSNK1A1,KRTAP3-1,--,KRT82,KRT75,FBF1,KRT5,KRTAP24-1,GPER1,--,--,--,--,KRT72,KRT74,KRT2,KRT1,KRT84,KRT85,KRT77,--,KRT3,--,KRT4,KRT79,KRT8,KRT18,--,KRT14,--,--,--,KRT13,--,--,--,--
GO:0002286	0.000727984	0.298591	35	40	T cell activation involved in immune response	BP	ENSSSCG00000014091,ENSSSCG00000011011,ENSSSCG00000029085,ENSSSCG00000030721,ENSSSCG00000030966,ENSSSCG00000026777,ENSSSCG00000023524,ENSSSCG00000026337,ENSSSCG00000028392,ENSSSCG00000022426,ENSSSCG00000005149,ENSSSCG00000027162,ENSSSCG00000028296,ENSSSCG00000025036,ENSSSCG00000028884,ENSSSCG00000025026,ENSSSCG00000030929,ENSSSCG00000030985,ENSSSCG00000005152,ENSSSCG00000021011,ENSSSCG00000027736,…	F2RL1,IFNK,CH242-81E23.2-001,CH242-81E23.3,IFN-ALPHA-2,IFN-OMEGA-3,IFN-ALPHA-10,IFN-DELTA-6,IFN-OMEGA-7,IFN-ALPHA-17,IFN-DELTA-1,--,--,--,IFN-OMEGA-2,IFN-ALPHA-8,IFN-DELTA-5,IFN-ALPHA-5,IFN-DELTA-2,IFN-ALPHA-11,IFN-ALPHA-15,IFN-DELTA-9,IFN-ALPHA-16,IFN-ALPHA-14,IFN-DELTA-10,IFN-OMEGA-5,IFN-OMEGA-6,IFN-DELTA-11,IFNA1,IFN-DELTA-4,IFN-ALPHA-13,--,--,--,IFNB1
GO:0005694	0.000787245	0.312807	96	116	chromosome	CC	ENSSSCG00000005404,ENSSSCG00000025957,ENSSSCG00000020991,ENSSSCG00000024918,ENSSSCG00000021860,ENSSSCG00000030071,ENSSSCG00000026668,ENSSSCG00000022049,ENSSSCG00000029773,ENSSSCG00000023360,ENSSSCG00000026930,ENSSSCG00000020971,ENSSSCG00000030023,ENSSSCG00000001177,ENSSSCG00000027435,ENSSSCG00000022537,ENSSSCG00000016738,ENSSSCG00000030396,ENSSSCG00000011531,ENSSSCG00000009995,ENSSSCG00000022571,…	--,HIST1H2BH,--,--,--,--,HIST1H2BC,--,HIST1H4L,--,HIST1H2BN,--,HIST1H1B,--,HIST1H3E,--,H2AFZ,SETD7,--,HORMAD2,--,--,--,--,H2AFY,--,--,--,RAD1,H1FX,PPP1R7,--,H2AFX,PRM1,HP1BP3,TNP2,--,--,--,HIST2H2AA3,--,--,--,--,--,--,SETDB1,--,HIST2H2AB,--,H3F3A,--,--,TN
GO:0006887	0.000913353	0.345521	65	70	exocytosis	BP	ENSSSCG00000010094,ENSSSCG00000030109,ENSSSCG00000028008,ENSSSCG00000030103,ENSSSCG00000016742,ENSSSCG00000014103,ENSSSCG00000029615,ENSSSCG00000010834,ENSSSCG00000025170,ENSSSCG00000000938,ENSSSCG00000023297,ENSSSCG00000023269,ENSSSCG00000022882,ENSSSCG00000016750,ENSSSCG00000015482,ENSSSCG00000004727,ENSSSCG00000017668,ENSSSCG00000006498,ENSSSCG00000022806,ENSSSCG00000020653,ENSSSCG00000007768,…	SNAP29,--,VAMP3,--,MYO1G,SCAMP1,VAMP7,MIA3,--,LIN7A,--,EXOC1,--,YKT6,VAMP4,SNAP23,VMP1,RAB25,LIN7C,--,STX4,CCL3L1,STX11,RAB27A,EXOC5,SCRN1,MYO5A,PRSS12,CCL5,STX1B,VAMP1,PLD1,SYTL1,SNAP25,SYTL2,EXOC7,RAB3A,PLD2,STXBP6,CCR1,--,STX3,--,SYTL3,RAB11A,RIMS1,--,SCRN2,PDZD11,LIN7B,STXBP3,STXBP2,SYTL5,--,--,VAMP8,--,SYCN,STX1A,STX2,SNAP47,STXBP1,CCL8,MYH10,EXOC3L1
GO:0006334	0.000923926	0.345521	62	71	nucleosome assembly	BP	ENSSSCG00000025957,ENSSSCG00000021860,ENSSSCG00000026668,ENSSSCG00000022049,ENSSSCG00000029773,ENSSSCG00000026930,ENSSSCG00000030023,ENSSSCG00000001177,ENSSSCG00000027435,ENSSSCG00000022571,ENSSSCG00000016440,ENSSSCG00000021101,ENSSSCG00000001471,ENSSSCG00000014307,ENSSSCG00000011613,ENSSSCG00000004439,ENSSSCG00000004438,ENSSSCG00000016977,ENSSSCG00000004120,ENSSSCG00000003511,ENSSSCG00000027253,…	HIST1H2BH,--,HIST1H2BC,--,HIST1H4L,HIST1H2BN,HIST1H1B,--,HIST1H3E,--,--,--,BRD2,H2AFY,H1FX,TSPYL4,TSPYL1,--,SHPRH,HP1BP3,--,DAXX,--,--,--,ASF1B,ANP32B,KAT6B,--,--,--,--,--,PADI4,MCM2,ASF1A,--,NPM1,CHAF1A,--,HIST1H2BA,NAP1L1,HIST2H2BF,--,HIST2H2BE,--,--,--,HILS1,--,HMGB1,--,--,HIST1H3E,--,--,TSPYL2,NAP1L4,NAP1L3,SOX9,CHAF1B,SETSIP
GO:0043330	0.00096129	0.349223	43	49	response to exogenous dsRNA	BP	ENSSSCG00000021684,ENSSSCG00000000573,ENSSSCG00000030408,ENSSSCG00000024771,ENSSSCG00000011011,ENSSSCG00000010081,ENSSSCG00000003178,ENSSSCG00000001952,ENSSSCG00000029085,ENSSSCG00000030721,ENSSSCG00000030966,ENSSSCG00000026777,ENSSSCG00000023524,ENSSSCG00000026337,ENSSSCG00000028392,ENSSSCG00000022426,ENSSSCG00000005149,ENSSSCG00000027162,ENSSSCG00000028296,ENSSSCG00000025036,ENSSSCG00000028884,…	MAPK3,KCNJ8,DDX58,TICAM1,IFNK,MAPK1,IRF3,NFKBIA,CH242-81E23.2-001,CH242-81E23.3,IFN-ALPHA-2,IFN-OMEGA-3,IFN-ALPHA-10,IFN-DELTA-6,IFN-OMEGA-7,IFN-ALPHA-17,IFN-DELTA-1,--,--,--,IFN-OMEGA-2,IFN-ALPHA-8,TLR3,IFN-DELTA-5,IFN-ALPHA-5,IFN-DELTA-2,IFN-ALPHA-11,IFN-ALPHA-15,IFN-DELTA-9,IFN-ALPHA-16,IFN-ALPHA-14,IFN-DELTA-10,IFN-OMEGA-5,IFN-OMEGA-6,IFN-DELTA-11,IFNA1,IFN-DELTA-4,IFN-ALPHA-13,--,--,--,IFNB1…
GO:0005515	0.00119719	0.422841	7173	8838	protein binding	MF	ENSSSCG00000021697,ENSSSCG00000023053,ENSSSCG00000021684,ENSSSCG00000028188,ENSSSCG00000026089,ENSSSCG00000023718,ENSSSCG00000025243,ENSSSCG00000025395,ENSSSCG00000022305,ENSSSCG00000007247,ENSSSCG00000027519,ENSSSCG00000028102,ENSSSCG00000025932,ENSSSCG00000024071,ENSSSCG00000024800,ENSSSCG00000002881,ENSSSCG00000026123,ENSSSCG00000010973,ENSSSCG00000017816,ENSSSCG00000016151,ENSSSCG00000010974,…	--,LRP10,MAPK3,--,--,--,SGIP1,TCTEX1D1,WDR78,KIF3B,--,TOLLIP,AP1S3,SCARF1,DSC2,FFAR2,IGFBP2,RPP25L,RILP,MAP2,CNTFR,WDR70,--,--,EGFLAM,NPY2R,--,--,--,KDM4A,BRD7,PRPF8,SLC25A6,CEBPD,--,EHD3,OSMR,PRMT2,C9orf24,RICTOR,--,GAPDHS,--,NUDT2,TMBIM6,ZNF205,--,UBAP1，’-,TCF21,TRIM32,--,GDF2,REEP6,MYBL2,ANXA11,TRIM46,S100A12,SUCLA2,E4F1,--,LRRD1,SYVN1,ARHGAP42,ARHGEF12,CDK5RAP3,PHF11,SCIMP,SYN1,SMARCA2,--,RCN…
							ENSSCG00000000137,ENSSSCG00000011881,ENSSSCG00000017066,ENSSSCG00000011277,ENSSSCG00000012551,ENSSSCG00000004589,ENSSSCG00000016974,ENSSSCG00000021026,ENSSSCG00000000767,ENSSSCG00000011615,ENSSSCG00000017546,ENSSSCG00000003282,ENSSSCG00000028902,ENSSSCG00000030568,ENSSSCG00000018057,ENSSSCG00000029511,ENSSSCG00000000960,ENSSSCG00000030155,ENSSSCG00000010005,ENSSSCG00000006023,ENSSSCG00000027060,E…
							ENSSSCG0000000002,ENSSSCG00000015830,ENSSSCG00000015871,ENSSSCG00000030660,ENSSSCG00000027076,ENSSSCG00000017044,ENSSSCG00000025770,ENSSSCG00000012872,ENSSSCG00000027270,ENSSSCG00000012138,ENSSSCG00000025353,ENSSSCG00000013248,ENSSSCG00000015681,ENSSSCG00000009755,ENSSSCG00000001892,ENSSSCG00000022951,ENSSSCG00000024106,ENSSSCG00000027710,ENSSSCG00000011211,ENSSSCG00000006062,ENSSSCG00000015506,E…
							ENSSSCG00000010143,ENSSSCG00000008134,ENSSSCG00000004516,ENSSSCG00000010036,ENSSSCG00000012703,ENSSSCG00000003739,ENSSSCG00000004058,ENSSSCG00000003586,ENSSSCG00000013064,ENSSSCG00000010770,ENSSSCG00000026423,ENSSSCG00000024746,ENSSSCG00000017214,ENSSSCG00000013119,ENSSSCG00000027738,ENSSSCG00000001834,ENSSSCG00000029165,ENSSSCG00000023434,ENSSSCG00000029602,ENSSSCG00000024676,ENSSSCG00000011078,…
							ENSSSCG00000006540,ENSSSCG00000001469,ENSSSCG00000008115,ENSSSCG00000003719,ENSSSCG00000010726,ENSSSCG00000006487,ENSSSCG00000028007,ENSSSCG00000000679,ENSSSCG00000025460,ENSSSCG00000025254,ENSSSCG00000017543,ENSSSCG00000008335,ENSSSCG00000015811,ENSSSCG00000005617,ENSSSCG00000014983,ENSSSCG00000011070,ENSSSCG00000007133,ENSSSCG00000015255,ENSSSCG00000015810,ENSSSCG00000030547,ENSSSCG00000001527,…
GO:0008543	0.00129863	0.446272	36	38	fibroblast growth factor receptor signaling pathway	BP	ENSSSCG00000016878,ENSSSCG00000030827,ENSSSCG00000013044,ENSSSCG00000028709,ENSSSCG00000024954,ENSSSCG00000005724,ENSSSCG00000009086,ENSSSCG00000009347,ENSSSCG00000026297,ENSSSCG00000030072,ENSSSCG00000000493,ENSSSCG00000027367,ENSSSCG00000009253,ENSSSCG00000029017,ENSSSCG00000022833,ENSSSCG00000010567,ENSSSCG00000028383,ENSSSCG00000016997,ENSSSCG00000012872,ENSSSCG00000012870,ENSSSCG00000012871,…	FGF10,--,FLRT1,--,FGF1,SETX,--,KL,KLB,IQGAP1,FRS2,--,FGF5,--,FGF16,--,--,FGF18,FGF3,FGF4,FGF19,FLRT2,--,--,FGFR4,--,FGF17,FGF9,--,FLRT3,CD19,FGF6,FGF23,RAB14,CTGF,FGFR1
GO:0001077	0.0015139	0.49779	142	159	transcriptional activator activity, RNA polymerase II core promoter proximal region sequence-specific binding	MF	ENSSSCG00000006276,ENSSSCG00000009656,ENSSSCG00000009034,ENSSSCG00000002906,ENSSSCG00000022155,ENSSSCG00000025592,ENSSSCG00000016520,ENSSSCG00000028760,ENSSSCG00000024152,ENSSSCG00000005702,ENSSSCG00000002630,ENSSSCG00000007171,ENSSSCG00000024591,ENSSSCG00000025415,ENSSSCG00000008860,ENSSSCG00000005730,ENSSSCG00000014401,ENSSSCG00000016637,ENSSSCG00000010578,ENSSSCG00000015475,ENSSSCG00000016662,…	CEBPD,--,--,ETV2,RBPJ,TP63,CREB3L2,--,ETV6,FUBP3,GCM1,EBF4,ETV1,--,--,BARHL1,NR3C1,TFEC,PITX3,MYOG,TBX20,SOX12,--,TFAP2A,POU1F1,POU4F3,--,SOX11,GSX1,NFAT5,CREB3,POU3F2,EGR2,POU4F1,FOS,DDIT3,GATA2,NEUROD1,BATF,HOXC13,TLX1,SMAD1,CEBPA,BSX,NKX2-8,CRX,PPARA,CEBPG,BARHL2,OTX2,NKX2-5,NFYC,LEF1,NRL,ONECUT1,PATZ1,NR4A3,MIXL1,NR2E1,--,GLIS2,TFEB,RFX4,NR1H2,NR4A2,DLX3,EGR1,AR,--,CU571095.1,HOXA7,ELF4,HOXA5…
GO:0019028	0.00152684	0.49779	29	29	viral capsid	CC	ENSSSCG00000022115,ENSSSCG00000029525,ENSSSCG00000029423,ENSSSCG00000021600,ENSSSCG00000008886,ENSSSCG00000024066,ENSSSCG00000030090,ENSSSCG00000029683,ENSSSCG00000028224,ENSSSCG00000026126,ENSSSCG00000023088,ENSSSCG00000029149,ENSSSCG00000024446,ENSSSCG00000030198,ENSSSCG00000029495,ENSSSCG00000023038,ENSSSCG00000026997,ENSSSCG00000024303,ENSSSCG00000022818,ENSSSCG00000025631,ENSSSCG00000025394,…	--,--,--,--,--,--,--,--,--,--,--,--,--,--,--,--,--,--,--,--,--,--,--,--,--,--,--,--,--
GO:0006959	0.00174784	0.555595	46	53	humoral immune response	BP	ENSSSCG00000009517,ENSSSCG00000022155,ENSSSCG00000000481,ENSSSCG00000025294,ENSSSCG00000011011,ENSSSCG00000014149,ENSSSCG00000021576,ENSSSCG00000017187,ENSSSCG00000004420,ENSSSCG00000029085,ENSSSCG00000030721,ENSSSCG00000030966,ENSSSCG00000026777,ENSSSCG00000023524,ENSSSCG00000026337,ENSSSCG00000028392,ENSSSCG00000022426,ENSSSCG00000005149,ENSSSCG00000027162,ENSSSCG00000028296,ENSSSCG00000025036,…	GPR183,RBPJ,IFNG,AIRE,IFNK,MEF2C,CD83,FOXJ1,TRAF3IP2,CH242-81E23.2-001,CH242-81E23.3,IFN-ALPHA-2,IFN-OMEGA-3,IFN-ALPHA-10,IFN-DELTA-6,IFN-OMEGA-7,IFN-ALPHA-17,IFN-DELTA-1,--,--,--,IFN-OMEGA-2,BMI1,IFN-ALPHA-8,IFN-DELTA-5,IFN-ALPHA-5,IFN-DELTA-2,IFN-ALPHA-11,IFN-ALPHA-15,IFN-DELTA-9,IFN-ALPHA-16,IFN-ALPHA-14,IFN-DELTA-10,IFN-OMEGA-5,IFN-OMEGA-6,IFN-DELTA-11,IFNA1,IFN-DELTA-4,IFN-ALPHA-13,--,--,--,…
GO:0005249	0.00202296	0.627364	71	77	voltage-gated potassium channel activity	MF	ENSSSCG00000027370,ENSSSCG00000021416,ENSSSCG00000025354,ENSSSCG00000022368,ENSSSCG00000023480,ENSSSCG00000026197,ENSSSCG00000016621,ENSSSCG00000016448,ENSSSCG00000027437,ENSSSCG00000000203,ENSSSCG00000023744,ENSSSCG00000013330,ENSSSCG00000005762,ENSSSCG00000028284,ENSSSCG00000027727,ENSSSCG00000005780,ENSSSCG00000001920,ENSSSCG00000005953,ENSSSCG00000008465,ENSSSCG00000017295,ENSSSCG00000029011,…	--,--,KCNA10,KCNS3,KCNA2,--,--,--,HCN2,--,--,--,KCNT1,KCND1,--,--,HCN4,--,KCNG3,KCNH6,--,--,KCNH4,HCN3,CNGB3,--,KCNQ4,KCNU1,KCNA3,KCNAB1,KCNC3,--,--,--,KCNE5,KCNAB3,--,KCNMA1,--,--,--,KCNE4,--,KCNB1,KCNA5,KCNA1,KCNA6,KCNG1,KCNE2,--,KCNV2,CNGA4,KCNQ5,CNGA2
GO:0005882	0.00273524	0.815979	76	83	intermediate filament	CC	ENSSSCG00000001025,ENSSSCG00000000195,ENSSSCG00000022864,ENSSSCG00000006496,ENSSSCG00000021232,ENSSSCG00000011033,ENSSSCG00000017464,ENSSSCG00000000235,ENSSSCG00000017463,ENSSSCG00000017462,ENSSSCG00000017301,ENSSSCG00000017461,ENSSSCG00000000236,ENSSSCG00000017343,ENSSSCG00000017460,ENSSSCG00000004241,ENSSSCG00000024067,ENSSSCG00000000248,ENSSSCG00000004620,ENSSSCG00000017465,ENSSSCG00000017469,…	DSP,PRPH,--,LMNA,SYNC,VIM,KRT25,KRT82,KRT26,KRT27,TLK2,KRT28,KRT75,GFAP,KRT12,GJA1,KRT23,KRT5,MYO5A,--,--,LMNB2,JUP,--,--,--,SYNM,KRT72,IFFO2,INA,LMNB1,KRT74,KRT2,--,KRT1,LMNTD1,KRT84,KRT85,KRT77,--,KRT3,--,--,KRT4,KRT79,KRT8,--,--,KRT18,--,KRT14,NEFL,BFSP2,--,--,NEFM,--,--,--,--,--,--,KRT31,KRT32,KRT35,KRT36,KRT13,KRT15,DES,--,KRT19,--,--,--,--,KRT39
GO:0051607	0.00275951	0.815979	88	102	defense response to virus	BP	ENSSSCG00000013415,ENSSSCG00000014091,ENSSSCG00000010451,ENSSSCG00000010452,ENSSSCG00000010453,ENSSSCG00000010454,ENSSSCG00000008319,ENSSSCG00000012077,ENSSSCG00000012076,ENSSSCG00000000481,ENSSSCG00000008648,ENSSSCG00000009882,ENSSSCG00000016573,ENSSSCG00000009720,ENSSSCG00000000573,ENSSSCG00000006543,ENSSSCG00000023489,ENSSSCG00000008977,ENSSSCG00000002869,ENSSSCG00000000091,ENSSSCG00000006264,…	AZU1,F2RL1,IFIT2,IFIT3,IFIT1,IFIT5,CD207,MX1,MX2,IFNG,RSAD2,OAS1,IRF5,DDX60,KCNJ8,ADAR,CXCL9,CXCL10,LSM14A,APOBEC3H,OPRK1,UNC13D,--,AGBL5,TICAM1,BCL2,IFNK,IL12B,CD40,IL33,--,PRF1,BNIP3,MB21D1,SAMHD1,C19orf66,TLR9,ISG20,ATG7,--,IRF3,NCBP3,GPAM,CH242-81E23.2-001,CH242-81E23.3,IFN-ALPHA-2,IFN-OMEGA-3,IFN-ALPHA-10,IFN-DELTA-6,IFN-OMEGA-7,IFN-ALPHA-17,IFN-DELTA-1,--,EXOSC4,--,--,IFN-OMEGA-2,IFN-ALPHA-…
GO:0006351	0.00333584	0.963983	327	382	transcription, DNA-templated	BP	ENSSSCG00000021684,ENSSSCG00000006276,ENSSSCG00000021932,ENSSSCG00000029493,ENSSSCG00000029194,ENSSSCG00000012734,ENSSSCG00000016591,ENSSSCG00000004815,ENSSSCG00000024987,ENSSSCG00000029641,ENSSSCG00000009034,ENSSSCG00000026015,ENSSSCG00000028391,ENSSSCG00000028798,ENSSSCG00000025920,ENSSSCG00000025298,ENSSSCG00000015372,ENSSSCG00000016057,ENSSSCG00000023455,ENSSSCG00000022921,ENSSSCG00000007970,…	MAPK3,CEBPD,FOXB1,--,--,--,PAX4,--,NR3C2,ZSCAN10,--,--,--,--,--,--,--,STAT1,NFIX,FOXN1,POLR3K,NFE2,ABLIM3,HOXD9,--,HOXD3,POLR2H,FUBP3,SMAD6,SMAD3,SMARCD3,EBF4,ESR1,MED27,--,--,KLF9,BHLHE40,PAX8,NR3C1,--,HES1,--,--,E2F4,--,FOXB2,MYOG,ABLIM2,NR2E3,ZNF165,TBX20,--,GPBP1,--,POU1F1,ZSCAN29,NEUROD4,POU4F3,PEG3,E2F7,ID1,--,RORA,--,TCEB3,TCEANC2,TBX22,POLR1D,ZNF518B,BACH2,GTF2A2,--,--,ESRRG,PAX2,POLR2B,Z…
GO:0070062	0.00354499	1	1461	1778	extracellular exosome	CC	ENSSSCG00000021811,ENSSSCG00000021684,ENSSSCG00000026089,ENSSSCG00000007247,ENSSSCG00000028102,ENSSSCG00000024800,ENSSSCG00000026123,ENSSSCG00000029045,ENSSSCG00000010166,ENSSSCG00000016857,ENSSSCG00000024726,ENSSSCG00000029592,ENSSSCG00000006282,ENSSSCG00000026957,ENSSSCG00000024355,ENSSSCG00000016856,ENSSSCG00000021821,ENSSSCG00000016859,ENSSSCG00000004068,ENSSSCG00000016861,ENSSSCG00000026239,…	GDPD3,MAPK3,--,KIF3B,TOLLIP,DSC2,IGFBP2,--,NTPCR,DAB2,--,GPRC5A,KIFAP3,RNASE6,AK2,C9,MYO1C,C7,NOX3,C6,VPS35,GGACT,ALPL,CRKL,--,SND1,PDXK,IFT20,ARF5,AZU1,GLA,MTM1,DNASE1L1,--,WASL,--,PTBP1,HIST1H2BH,CHL1,--,CHMP5,DAD1,ACTA2,--,--,UPK1A,--,CYB5R1,RAB5B,GNPTG,FAS,CHMP2A,ATP5H,TWSG1,AKR1A1,CYB5R3,PAFAH1B1,HIST1H4L,LIPA,PSMD2,HIST1H2BN,NDUFB10,GALNT16,--,S100A6,--,B4GALT1,--,LCAT,NUDT14,EPX,PTPA,HIST1…
GO:0002250	0.00404897	1	57	67	adaptive immune response	BP	ENSSSCG00000026803,ENSSSCG00000008820,ENSSSCG00000026742,ENSSSCG00000022106,ENSSSCG00000000481,ENSSSCG00000008819,ENSSSCG00000015283,ENSSSCG00000003395,ENSSSCG00000012137,ENSSSCG00000001770,ENSSSCG00000027272,ENSSSCG00000011011,ENSSSCG00000004898,ENSSSCG00000012495,ENSSSCG00000027164,ENSSSCG00000021203,ENSSSCG00000017056,ENSSSCG00000023210,ENSSSCG00000004421,ENSSSCG00000022924,ENSSSCG00000000591,…	--,TEC,BTK,--,IFNG,--,PIK3C2B,CH242-402I11.1,BMX,CTSH,--,IFNK,TNFRSF11A,BTK,--,--,--,--,FYN,--,PIK3C2G,CH242-81E23.2-001,CH242-81E23.3,IFN-ALPHA-2,IFN-OMEGA-3,IFN-ALPHA-10,IFN-DELTA-6,IFN-OMEGA-7,IFN-ALPHA-17,IFN-DELTA-1,--,--,--,IFN-OMEGA-2,IFN-ALPHA-8,I
GO:0000978	0.00448208	1	198	227	RNA polymerase II core promoter proximal region sequence-specific DNA binding	MF	ENSSSCG00000006276,ENSSSCG00000022683,ENSSSCG00000026092,ENSSSCG00000009034,ENSSSCG00000002906,ENSSSCG00000016612,ENSSSCG00000022155,ENSSSCG00000016520,ENSSSCG00000028760,ENSSSCG00000024753,ENSSSCG00000024152,ENSSSCG00000005702,ENSSSCG00000004948,ENSSSCG00000004952,ENSSSCG00000002630,ENSSSCG00000024174,ENSSSCG00000002836,ENSSSCG00000024591,ENSSSCG00000008860,ENSSSCG00000000272,ENSSSCG00000014401,…	CEBPD,TBP,SREBF2,--,ETV2,FEZF1,RBPJ,CREB3L2,--,ZGPAT,ETV6,FUBP3,SMAD6,SMAD3,GCM1,TGIF1,SALL1,ETV1,--,SP1,NR3C1,E2F4,TFEC,PITX3,MYOG,TBX20,MYF6,--,TFAP2A,POU4F3,--,SOX10,--,--,NKX3-2,GSX1,SMARCD2,NFAT5,CREB3,TBX2,POU3F2,EGR2,KCNIP3,FOS,DDIT3,NEUROD1,BATF,HAND1,TLX1,SMAD1,CEBPA,HHEX,BSX,NKX2-8,CRX,JUN,PRDM5,PPARA,CEBPG,RFX7,--,SKIL,CHD4,HINFP,HSF1,OTX2,NKX2-5,MTA2,ZBTB7A,NFYC,LEF1,NRL,PATZ1,MYPOP,N…
GO:0042127	0.00468079	1	157	180	regulation of cell proliferation	BP	ENSSSCG00000028059,ENSSSCG00000017755,ENSSSCG00000009004,ENSSSCG00000026803,ENSSSCG00000008820,ENSSSCG00000026742,ENSSSCG00000015318,ENSSSCG00000011810,ENSSSCG00000010998,ENSSSCG00000022155,ENSSSCG00000027140,ENSSSCG00000005706,ENSSSCG00000027291,ENSSSCG00000020667,ENSSSCG00000005742,ENSSSCG00000002787,ENSSSCG00000015961,ENSSSCG00000002718,ENSSSCG00000016636,ENSSSCG00000008953,ENSSSCG00000008819,…	--,NOS2,SFRP2,--,TEC,BTK,--,--,B4GALT1,RBPJ,CDKN1B,ABL1,--,--,DBH,E2F4,CDCA7,FA2H,TES,CXCL8,--,PTCH1,PPBP,PF4,CXCL2,ABL2,STYK1,--,TFAP2A,PKD2,BIRC6,--,TNFRSF9,--,PLAU,FRK,--,TFAP2D,PPBP,BID,--,CHST11,FOXO1,PLCD3,--,CEBPA,HHEX,TBX19,NGFR,HP1BP3,--,TGFB3,JU
GO:0008076	0.00512737	1	62	68	voltage-gated potassium channel complex	CC	ENSSSCG00000017252,ENSSSCG00000027370,ENSSSCG00000021416,ENSSSCG00000016423,ENSSSCG00000025354,ENSSSCG00000022368,ENSSSCG00000023480,ENSSSCG00000026197,ENSSSCG00000016621,ENSSSCG00000016448,ENSSSCG00000004546,ENSSSCG00000013330,ENSSSCG00000005762,ENSSSCG00000028284,ENSSSCG00000027727,ENSSSCG00000005780,ENSSSCG00000005953,ENSSSCG00000008465,ENSSSCG00000029011,ENSSSCG00000023934,ENSSSCG00000003975,…	KCNJ2,--,--,--,KCNA10,KCNS3,KCNA2,--,--,--,SUMO1,--,KCNT1,KCND1,--,--,--,KCNG3,--,KCNIP4,KCNQ4,KCNU1,KCNA3,KCNC3,--,KCNE5,--,KCNIP2,KCNMA1,--,--,--,--,--,KCNB1,--,KCNA5,KCNA1,KCNA6,--,KCNG1,KCNE2,--,KCNV2,KCNQ5,KCNIP1,KCNMB1,--,KCNE3,KCNC1,KCNA7,KCNT2,--,--,AMIGO1,--,--,ABCC8,KCNAB2,KCNJ11,KCNS1,KCNV1
GO:0030672	0.00581233	1	21	21	synaptic vesicle membrane	CC	ENSSSCG00000010926,ENSSSCG00000015048,ENSSSCG00000010927,ENSSSCG00000021534,ENSSSCG00000014103,ENSSSCG00000000948,ENSSSCG00000012292,ENSSSCG00000008036,ENSSSCG00000023537,ENSSSCG00000020873,ENSSSCG00000021298,ENSSSCG00000021843,ENSSSCG00000013343,ENSSSCG00000023225,ENSSSCG00000001062,ENSSSCG00000003131,ENSSSCG00000000154,ENSSSCG00000012276,ENSSSCG00000017984,ENSSSCG00000007714,ENSSSCG00000003170	SYT2,DRD2,--,SLC30A3,SCAMP1,SYT1,SYP,SYNGR3,SYT8,SYNGR1,--,SYT5,SLC17A6,SYN2,DTNBP1,SYNGR4,--,SYN1,--,STX1A,SLC17A7
GO:0035176	0.00611876	1	24	24	social behavior	BP	ENSSSCG00000021269,ENSSSCG00000021585,ENSSSCG00000005282,ENSSSCG00000010440,ENSSSCG00000017797,ENSSSCG00000001924,ENSSSCG00000006545,ENSSSCG00000004384,ENSSSCG00000010352,ENSSSCG00000015715,ENSSSCG00000010268,ENSSSCG00000007064,ENSSSCG00000022068,ENSSSCG00000003215,ENSSSCG00000003342,ENSSSCG00000005504,ENSSSCG00000004185,ENSSSCG00000010130,ENSSSCG00000012796,ENSSSCG00000013024,ENSSSCG00000010299,…	SHANK3,OXTR,VPS13A,PTEN,SLC6A4,BBS4,CHRNB2,NR2E1,--,EN1,EIF4EBP2,MKKS,GNG8,SHANK1,DVL1,BRINP1,TAAR5,GNB1L,MECP2,NRXN2,ANXA7,--,MSS51,PPP3CB
GO:0006813	0.00612008	1	99	111	potassium ion transport	BP	ENSSSCG00000002902,ENSSSCG00000017252,ENSSSCG00000017253,ENSSSCG00000027370,ENSSSCG00000021416,ENSSSCG00000025354,ENSSSCG00000022368,ENSSSCG00000023480,ENSSSCG00000012065,ENSSSCG00000012066,ENSSSCG00000027140,ENSSSCG00000026197,ENSSSCG00000016621,ENSSSCG00000028437,ENSSSCG00000016448,ENSSSCG00000027437,ENSSSCG00000000203,ENSSSCG00000013330,ENSSSCG00000005762,ENSSSCG00000028284,ENSSSCG00000027727,…	--,KCNJ2,KCNJ16,--,--,KCNA10,KCNS3,KCNA2,KCNJ6,KCNJ15,CDKN1B,--,--,--,--,HCN2,--,--,KCNT1,KCND1,--,--,HCN4,NMRAL1,--,ATP1B1,CDK2,KCNG3,KCNH6,--,KCNJ8,--,KCNH4,ATP1A1,HCN3,KCNJ13,--,KCNQ4,--,KCNU1,KCNA3,KCNAB1,KCNC3,--,KCNAB3,VPS4B,--,KCNJ3,KCNK6,KCNIP2,KC
GO:0050909	0.00638271	1	24	25	sensory perception of taste	BP	ENSSSCG00000016433,ENSSSCG00000016457,ENSSSCG00000016458,ENSSSCG00000028554,ENSSSCG00000000631,ENSSSCG00000016467,ENSSSCG00000021954,ENSSSCG00000005766,ENSSSCG00000005765,ENSSSCG00000028945,ENSSSCG00000010601,ENSSSCG00000009148,ENSSSCG00000015406,ENSSSCG00000008011,ENSSSCG00000029468,ENSSSCG00000003308,ENSSSCG00000025917,ENSSSCG00000003309,ENSSSCG00000000182,ENSSSCG00000028394,ENSSSCG00000021525,…	--,TAS2R41,TAS2R60,TAS2R1,TAS2R9,TAS2R40,TAS2R39,--,--,--,CALHM1,LEF1,GNAT3,GNG13,P2RX3,--,--,--,WNT10B,TAS2R3,TAS2R4,CYSLTR2,--,--
GO:0030154	0.00644544	1	166	193	cell differentiation	BP	ENSSSCG00000021932,ENSSSCG00000029894,ENSSSCG00000029194,ENSSSCG00000008820,ENSSSCG00000026742,ENSSSCG00000002906,ENSSSCG00000009458,ENSSSCG00000015370,ENSSSCG00000003681,ENSSSCG00000017836,ENSSSCG00000022921,ENSSSCG00000023417,ENSSSCG00000025592,ENSSSCG00000022318,ENSSSCG00000014445,ENSSSCG00000017762,ENSSSCG00000023229,ENSSSCG00000024152,ENSSSCG00000017265,ENSSSCG00000005706,ENSSSCG00000024591,…	FOXB1,--,--,TEC,BTK,ETV2,--,TWIST1,TWSG1,PAFAH1B1,FOXN1,--,TP63,ERG,--,--,ETV5,ETV6,--,ABL1,ETV1,BMP6,--,PAX8,--,FOXB2,MYOG,ABL2,STYK1,MYF6,SOHLH1,NEUROD4,SOX10,FOXA1,--,FOXR2,--,--,FRK,FOXQ1,--,GATA2,NEUROD1,CDX2,BATF,HAND1,ARF6,--,ZGLP1,PRM1,FOXO1,ETV3,TNP2,AXIN1,ETV3L,PLAGL1,PAQR7,STMN1,FOXE1,--,NKX2-5,SRY,FOXA3,FOXP3,BMX,ONECUT1,DHCR7,ACER1,FOXO3,FOXH1,ANGPTL4,--,FOXI2,TYK2,ZAP70,--,TNP1,FOXN…
GO:0005126	0.0068456	1	41	50	cytokine receptor binding	MF	ENSSSCG00000009051,ENSSSCG00000014434,ENSSSCG00000009087,ENSSSCG00000010067,ENSSSCG00000025308,ENSSSCG00000011011,ENSSSCG00000017044,ENSSSCG00000029085,ENSSSCG00000030721,ENSSSCG00000030966,ENSSSCG00000026777,ENSSSCG00000023524,ENSSSCG00000026337,ENSSSCG00000028392,ENSSSCG00000022426,ENSSSCG00000005149,ENSSSCG00000027162,ENSSSCG00000028296,ENSSSCG00000025036,ENSSSCG00000028884,ENSSSCG00000025026,…	IL15,IL17B,IL21,MIF,IL17D,IFNK,IL12B,CH242-81E23.2-001,CH242-81E23.3,IFN-ALPHA-2,IFN-OMEGA-3,IFN-ALPHA-10,IFN-DELTA-6,IFN-OMEGA-7,IFN-ALPHA-17,IFN-DELTA-1,--,--,--,IFN-OMEGA-2,IFN-ALPHA-8,IFN-DELTA-5,IFN-ALPHA-5,IFN-DELTA-2,IFN-ALPHA-11,IFN-ALPHA-15,IFN-DELTA-9,IFN-ALPHA-16,IFN-ALPHA-14,IFN-DELTA-10,IFN-OMEGA-5,IFN-OMEGA-6,IFN-DELTA-11,IFNA1,IFN-DELTA-4,IFN-ALPHA-13,--,--,--,IFNB1,IL13
GO:0034765	0.00692235	1	83	92	regulation of ion transmembrane transport	BP	ENSSSCG00000017252,ENSSSCG00000017253,ENSSSCG00000021447,ENSSSCG00000027370,ENSSSCG00000025354,ENSSSCG00000022368,ENSSSCG00000023480,ENSSSCG00000012065,ENSSSCG00000012066,ENSSSCG00000029419,ENSSSCG00000016621,ENSSSCG00000017269,ENSSSCG00000023102,ENSSSCG00000017271,ENSSSCG00000013330,ENSSSCG00000028284,ENSSSCG00000017282,ENSSSCG00000005780,ENSSSCG00000000763,ENSSSCG00000001711,ENSSSCG00000024784,…	KCNJ2,KCNJ16,--,--,KCNA10,KCNS3,KCNA2,KCNJ6,KCNJ15,--,--,CACNG5,CACNG4,CACNG1,--,KCND1,SCN4A,--,--,CLIC5,CACNA1S,KCNG3,--,--,KCNJ8,CACNG2,CALHM1,KCNJ13,CACNA1E,KCNA3,HVCN1,KCNC3,--,SCN3A,CACNG3,--,SCN2A,KCNJ3,CACNG7,CACNG8,SCN8A,CACNG6,--,--,--,--,--,TPCN2,CATSPER1,KCNJ1,KCNJ5,KCNJ14,--,KCNB1,--,SCN9A,NEDD4L,KCNA5,KCNA1,KCNA6,KCNG1,--,KCNJ4,SCN7A,KCNV2,CLIC6,WWP2,CACNA1I,KCNC1,KCNA7,STOM,--,--,SC…
GO:0000977	0.00694412	1	164	187	RNA polymerase II regulatory region sequence-specific DNA binding	MF	ENSSSCG00000025705,ENSSSCG00000028059,ENSSSCG00000027648,ENSSSCG00000010993,ENSSSCG00000015371,ENSSSCG00000024549,ENSSSCG00000016612,ENSSSCG00000011810,ENSSSCG00000023417,ENSSSCG00000015982,ENSSSCG00000014445,ENSSSCG00000015983,ENSSSCG00000023229,ENSSSCG00000024152,ENSSSCG00000005703,ENSSSCG00000004952,ENSSSCG00000027479,ENSSSCG00000025130,ENSSSCG00000000272,ENSSSCG00000005730,ENSSSCG00000005737,…	--,--,TRPS1,--,FERD3L,--,FEZF1,--,--,HOXD9,--,HOXD8,ETV5,ETV6,PRDM12,SMAD3,--,--,SP1,BARHL1,GFI1B,ZNF691,ZNF583,YBX3,MYOG,H2AFY,PRDM15,TBX20,HMX1,SOHLH1,MSX1,TFAP2A,ZBTB21,E2F7,RORA,ZBTB49,ARID5B,--,ESRRG,--,KAT2B,DMBX1,EAF2,ATF4,CREB3,FOXF2,ZNF584,--,AEB
GO:0008544	0.00707004	1	24	24	epidermis development	BP	ENSSSCG00000016878,ENSSSCG00000009048,ENSSSCG00000025592,ENSSSCG00000027312,ENSSSCG00000003539,ENSSSCG00000004346,ENSSSCG00000018041,ENSSSCG00000017192,ENSSSCG00000000006,ENSSSCG00000006060,ENSSSCG00000023969,ENSSSCG00000026068,ENSSSCG00000005914,ENSSSCG00000000250,ENSSSCG00000012960,ENSSSCG00000003433,ENSSSCG00000026367,ENSSSCG00000005124,ENSSSCG00000017135,ENSSSCG00000003160,ENSSSCG00000011201,…	FGF10,GAB1,TP63,PTCH1,GRHL3,POU3F2,ALDH3A2,EVPL,PPARA,GRHL2,ACER1,--,SHARPIN,KRT2,CST6,PLOD1,IFT172,IFT74,ZNF750,NTF4,SATB1,KIF3A,POU3F1,OVOL1
GO:0051260	0.00736979	1	98	110	protein homooligomerization	BP	ENSSSCG00000024943,ENSSSCG00000004069,ENSSSCG00000016091,ENSSSCG00000024626,ENSSSCG00000027370,ENSSSCG00000021837,ENSSSCG00000025354,ENSSSCG00000008838,ENSSSCG00000010101,ENSSSCG00000010448,ENSSSCG00000029362,ENSSSCG00000022368,ENSSSCG00000000029,ENSSSCG00000023480,ENSSSCG00000009388,ENSSSCG00000027757,ENSSSCG00000005683,ENSSSCG00000025964,ENSSSCG00000016621,ENSSSCG00000026178,ENSSSCG00000010649,…	EHD3,--,--,TNFAIP1,--,TMEM120A,KCNA10,LNX1,P2RX6,FAS,CHMP2A,KCNS3,SCUBE1,KCNA2,KCNRG,FIS1,TOR1B,TOR1A,--,--,VWA2,KCTD12,HMOX1,CAV1,--,--,KCND1,--,LNX2,--,KCTD19,IDE,KCNG3,TRIM72,BID,C10orf2,--,SPTBN5,--,CALHM1,SPAST,TNFSF11,--,KCNA3,PRND,PRNP,KCNC3,KCTD10,--,RIPK1,CHMP4B,ATPIF1,--,--,ANXA6,MUC20,DERL1,--,ATL2,MICU1,PRF1,NLGN1,KCTD11,IGHMBP2,CRYAB,PEX14,KCNB1,SLC1A1,--,CCDC88C,KCNA5,C1QTNF1,KCNA1,…
GO:0005759	0.00769447	1	62	68	mitochondrial matrix	CC	ENSSSCG00000016156,ENSSSCG00000023869,ENSSSCG00000000359,ENSSSCG00000014432,ENSSSCG00000023874,ENSSSCG00000003808,ENSSSCG00000022867,ENSSSCG00000026162,ENSSSCG00000001476,ENSSSCG00000022874,ENSSSCG00000010251,ENSSSCG00000011157,ENSSSCG00000007857,ENSSSCG00000014855,ENSSSCG00000024254,ENSSSCG00000013526,ENSSSCG00000000784,ENSSSCG00000017741,ENSSSCG00000013542,ENSSSCG00000000165,ENSSSCG00000009150,…	ACADL,--,BLOC1S1,GRPEL2,--,--,--,--,HSD17B8,DNAJA3,SUPV3L1,PITRM1,ACSM3,RPS3,ALKBH7,LONP1,LRRK2,TEFM,CLPP,MTERF2,HADH,PCCB,--,GLRX5,--,--,NFS1,ISCA2,SIRT3,TRAP1,TRMT5,ALDH2,AK3,ISCA1,ALAS1,COASY,CLPX,GLUD1,TIMM44,--,--,DLAT,NUDT1,--,CASQ1,ERAL1,FDXR,TP53,--,UQCC2,HADHA,ETFB,NAGS,--,SIRT4,IBA57,CCAR2,THEM5,ACSS1,ALAS2,GLS,PARK7
GO:0005244	0.00776723	1	82	91	voltage-gated ion channel activity	MF	ENSSSCG00000017252,ENSSSCG00000017253,ENSSSCG00000021447,ENSSSCG00000027370,ENSSSCG00000025354,ENSSSCG00000022368,ENSSSCG00000023480,ENSSSCG00000012065,ENSSSCG00000012066,ENSSSCG00000029419,ENSSSCG00000016621,ENSSSCG00000017269,ENSSSCG00000023102,ENSSSCG00000017271,ENSSSCG00000013330,ENSSSCG00000028284,ENSSSCG00000017282,ENSSSCG00000009217,ENSSSCG00000005780,ENSSSCG00000000763,ENSSSCG00000001711,…	KCNJ2,KCNJ16,--,--,KCNA10,KCNS3,KCNA2,KCNJ6,KCNJ15,--,--,CACNG5,CACNG4,CACNG1,--,KCND1,SCN4A,PKD2,--,--,CLIC5,CACNA1S,KCNG3,--,--,KCNJ8,CACNG2,CALHM1,KCNJ13,CACNA1E,KCNA3,HVCN1,KCNC3,--,SCN3A,CACNG3,--,SCN2A,KCNJ3,CACNG7,CACNG8,SCN8A,CACNG6,--,--,--,--,--,TPCN2,CATSPER1,KCNJ1,KCNJ5,ANO6,KCNJ14,--,KCNB1,--,SCN9A,KCNA5,KCNA1,KCNA6,KCNG1,--,KCNJ4,SCN7A,KCNV2,CLIC6,CACNA1I,KCNC1,KCNA7,--,--,SCN5A,--,…
GO:0045944	0.00805753	1	581	692	positive regulation of transcription from RNA polymerase II promoter	BP	ENSSSCG00000021684,ENSSSCG00000006276,ENSSSCG00000009004,ENSSSCG00000029493,ENSSSCG00000027648,ENSSSCG00000009656,ENSSSCG00000029119,ENSSSCG00000026092,ENSSSCG00000009034,ENSSSCG00000002906,ENSSSCG00000029275,ENSSSCG00000016878,ENSSSCG00000014091,ENSSSCG00000016419,ENSSSCG00000015370,ENSSSCG00000024394,ENSSSCG00000028798,ENSSSCG00000023455,ENSSSCG00000028041,ENSSSCG00000011771,ENSSSCG00000014095,…	MAPK3,CEBPD,SFRP2,--,TRPS1,--,PRPF6,SREBF2,--,ETV2,PPARGC1A,FGF10,F2RL1,EN2,TWIST1,IKZF4,--,NFIX,CRTC3,SOX2,ZBED3,EGLN1,RBPJ,ISL1,RPS6KA5,TP63,CREB3L2,ABLIM3,HOXD9,HSPH1,HOXD8,ETV5,--,RPS6KA4,--,STRA8,ETV6,PML,--,FUBP3,RFXANK,--,SMAD3,LRP6,GCM1,--,EBF4,SALL1,ETV1,BMP6,WNT2,--,--,CAMK1,--,SNW1,SP7,LIF,NFE2L2,FGF1,SETX,SP1,BARHL1,--,CHUK,--,--,PCGF5,PAX8,RNF4,MET,OSM,NR3C1,HRAS,SERPINF2,--,TNIP2,AD…
GO:0005125	0.00842672	1	141	174	cytokine activity	MF	ENSSSCG00000006815,ENSSSCG00000023032,ENSSSCG00000009051,ENSSSCG00000023909,ENSSSCG00000014434,ENSSSCG00000000363,ENSSSCG00000020970,ENSSSCG00000001027,ENSSSCG00000016628,ENSSSCG00000009996,ENSSSCG00000027850,ENSSSCG00000027291,ENSSSCG00000009997,ENSSSCG00000009087,ENSSSCG00000000481,ENSSSCG00000008953,ENSSSCG00000026872,ENSSSCG00000008956,ENSSSCG00000008955,ENSSSCG00000008959,ENSSSCG00000029692,…	--,SCG2,IL15,THPO,IL17B,GDF11,IL-6,BMP6,WNT2,LIF,IL6,--,OSM,IL21,IFNG,CXCL8,TNFSF13,PPBP,PF4,CXCL2,--,--,--,EDN1,SPP1,TNFSF14,LEFTY2,TSLP,--,--,PPBP,CD70,CCL4,BMP3,CCL22,CCL3L1,CCL23,TGFB3,CLCF1,TNFSF11,CXCL9,GDF5,--,CH242-185F9.2,IL17A,CCL19,INHBA,NAMPT,
GO:0005104	0.00912468	1	26	28	fibroblast growth factor receptor binding	MF	ENSSSCG00000016878,ENSSSCG00000013044,ENSSSCG00000028709,ENSSSCG00000024954,ENSSSCG00000009086,ENSSSCG00000009347,ENSSSCG00000026297,ENSSSCG00000000493,ENSSSCG00000009253,ENSSSCG00000029017,ENSSSCG00000022833,ENSSSCG00000010567,ENSSSCG00000028383,ENSSSCG00000016997,ENSSSCG00000012872,ENSSSCG00000012870,ENSSSCG00000012871,ENSSSCG00000002418,ENSSSCG00000020664,ENSSSCG00000020800,ENSSSCG00000001624,…	FGF10,FLRT1,--,FGF1,--,KL,KLB,FRS2,FGF5,--,FGF16,--,--,FGF18,FGF3,FGF4,FGF19,FLRT2,--,--,--,FGF17,FGF9,FLRT3,FGF6,FGF23
GO:0035987	0.00947872	1	22	22	endodermal cell differentiation	BP	ENSSSCG00000002829,ENSSSCG00000022506,ENSSSCG00000015618,ENSSSCG00000000293,ENSSSCG00000002806,ENSSSCG00000021865,ENSSSCG00000030675,ENSSSCG00000007436,ENSSSCG00000016009,ENSSSCG00000011973,ENSSSCG00000006857,ENSSSCG00000016174,ENSSSCG00000025133,ENSSSCG00000009545,ENSSSCG00000003702,ENSSSCG00000005101,ENSSSCG00000015444,ENSSSCG00000016027,ENSSSCG00000000460,ENSSSCG00000003709,ENSSSCG00000011355,…	MMP2,--,LAMB3,ITGA5,MMP15,INHBA,MIXL1,MMP9,ITGA4,COL8A1,COL11A1,FN1,ITGB2,COL4A2,GATA6,--,LAMB1,ITGAV,HSBP1,--,COL7A1,MMP8
GO:0046982	0.010375	1	239	291	protein heterodimerization activity	MF	ENSSSCG00000017817,ENSSSCG00000006276,ENSSSCG00000001948,ENSSSCG00000004923,ENSSSCG00000025957,ENSSSCG00000010930,ENSSSCG00000020991,ENSSSCG00000024918,ENSSSCG00000015370,ENSSSCG00000021860,ENSSSCG00000024394,ENSSSCG00000030071,ENSSSCG00000026668,ENSSSCG00000022049,ENSSSCG00000008692,ENSSSCG00000000029,ENSSSCG00000029773,ENSSSCG00000023360,ENSSSCG00000026930,ENSSSCG00000020971,ENSSSCG00000010647,…	PRPF8,CEBPD,--,SLC51B,HIST1H2BH,ADIPOR1,--,--,TWIST1,--,IKZF4,--,HIST1H2BC,--,ADD1,SCUBE1,HIST1H4L,--,HIST1H2BN,--,ADRB1,MIGA2,--,HIST1H3E,--,SMAD3,H2AFZ,BMP6,--,--,ADRA2C,PRMT5,GCLM,CHUK,SDCBP2,BHLHE40,CAV1,CAV2,--,--,H2AFY,BAD,DR1,ADIPOR2,ABCG1,DVL3,GTF2A2,DMBX1,CD3E,CD3D,LIMK2,DDIT3,NEUROD1,HAND1,--,H2AFX,CD3G,SOS2,TYRO3,HEY2,LIMK1,SMAD1,ITGB1,TAF6L,SUPT4H1,NFYB,TPD52L1,IKBKB,CHRAC1,TPD52,IKZF…
GO:0042472	0.0104086	1	41	43	inner ear morphogenesis	BP	ENSSSCG00000016878,ENSSSCG00000016420,ENSSSCG00000025523,ENSSSCG00000021332,ENSSSCG00000001036,ENSSSCG00000014412,ENSSSCG00000024428,ENSSSCG00000011618,ENSSSCG00000010052,ENSSSCG00000003975,ENSSSCG00000004379,ENSSSCG00000005385,ENSSSCG00000009482,ENSSSCG00000017993,ENSSSCG00000017804,ENSSSCG00000006857,ENSSSCG00000016018,ENSSSCG00000005087,ENSSSCG00000005089,ENSSSCG00000014796,ENSSSCG00000014876,…	FGF10,INSIG1,COL2A1,PAX8,TFAP2A,POU4F3,CHRNA9,GATA2,BCR,KCNQ4,SOBP,NR4A3,SPRY2,--,ABR,COL11A1,FRZB,SIX1,SIX4,CHRNA10,MYO7A,FGF9,WNT5A,ITGA8,MAFB,USH1G,ATP6V1B1,FOXI1,WNT1,OTX1,FZD6,FZD3,EPHB2,ROR2,ATOH1,GATA3,WNT3A,--,HMX3,HMX2,FGFR1
GO:0032482	0.0107061	1	57	63	Rab protein signal transduction	BP	ENSSSCG00000025163,ENSSSCG00000021660,ENSSSCG00000029828,ENSSSCG00000025041,ENSSSCG00000024839,ENSSSCG00000025890,ENSSSCG00000029544,ENSSSCG00000029051,ENSSSCG00000022133,ENSSSCG00000026571,ENSSSCG00000010192,ENSSSCG00000016928,ENSSSCG00000006498,ENSSSCG00000017769,ENSSSCG00000011638,ENSSSCG00000011615,ENSSSCG00000010048,ENSSSCG00000013848,ENSSSCG00000004117,ENSSSCG00000007679,ENSSSCG00000000139,…	--,--,RAB5B,--,--,RAB9B,RAB2B,--,--,RAB8B,RAB4A,RAB3C,RAB25,--,RAB6B,RAB7A,RAB36,RAB8A,RAB32,IFT22,IFT27,RAB5C,--,RAB19,RAB44,RAB27A,RAB21,--,--,RAB23,--,RAB3D,--,RAB29,RAB7B,RAB3A,--,--,RAB20,RAB35,RAB39A,RAB11A,RAB27B,RAB15,RAB37,RAB22A,RAB3B,RAB10,RAB1
GO:0005887	0.0107681	1	852	1048	integral component of plasma membrane	CC	ENSSSCG00000002892,ENSSSCG00000009517,ENSSSCG00000024712,ENSSSCG00000013132,ENSSSCG00000024360,ENSSSCG00000009518,ENSSSCG00000021797,ENSSSCG00000013057,ENSSSCG00000013139,ENSSSCG00000021139,ENSSSCG00000021102,ENSSSCG00000025636,ENSSSCG00000027837,ENSSSCG00000013138,ENSSSCG00000028676,ENSSSCG00000011574,ENSSSCG00000022662,ENSSSCG00000021033,ENSSSCG00000025985,ENSSSCG00000010163,ENSSSCG00000022735,…	FFAR1,GPR183,APCDD1,OR5A2,--,--,--,--,--,--,MAEA,--,--,--,--,--,--,--,--,KCNK1,--,--,DRD2,ESYT2,GPR179,--,GRM8,AQP3,SLC10A4,--,--,--,PLPPR3,KCNJ2,KCNJ16,--,F2RL1,SLC13A1,SLC6A2,STEAP1B,UPK1A,HHIP,P2RX6,--,ABCB5,SLC7A4,SLC10A2,HTR4,KCNA2,HTR3B,GPR50,OXTR,KCNJ6,KDR,PLPP2,ADRB1,--,KCNJ15,GPR132,CCKAR,FLT4,--,SLC13A4,PLXNA2,SLC6A7,SLC16A12,GABRE,--,--,SLC19A2,OR5B21,--,CD34,--,GABRQ,CD37,OR5B12,--,--…
GO:0006611	0.0108607	1	21	21	protein export from nucleus	BP	ENSSSCG00000025301,ENSSSCG00000005711,ENSSSCG00000006816,ENSSSCG00000023793,ENSSSCG00000017290,ENSSSCG00000010224,ENSSSCG00000028228,ENSSSCG00000011889,ENSSSCG00000009611,ENSSSCG00000009276,ENSSSCG00000003017,ENSSSCG00000014338,ENSSSCG00000025534,ENSSSCG00000029603,ENSSSCG00000008041,ENSSSCG00000017000,ENSSSCG00000001391,ENSSSCG00000007812,ENSSSCG00000013746,ENSSSCG00000009746,ENSSSCG00000007119	--,NUP214,AHCYL1,NUPL2,--,EGR2,XPO1,GSK3B,XPO7,XPO4,TGFB1,HSPA9,--,--,PKD1,RANBP17,CCHCR1,XPO6,CALR,--,NXT1
GO:0007266	0.0109687	1	34	36	Rho protein signal transduction	BP	ENSSSCG00000024171,ENSSSCG00000026389,ENSSSCG00000017277,ENSSSCG00000017290,ENSSSCG00000011842,ENSSSCG00000011843,ENSSSCG00000004763,ENSSSCG00000006461,ENSSSCG00000004781,ENSSSCG00000027532,ENSSSCG00000012848,ENSSSCG00000028387,ENSSSCG00000029426,ENSSSCG00000026417,ENSSSCG00000026108,ENSSSCG00000007061,ENSSSCG00000017866,ENSSSCG00000005443,ENSSSCG00000021359,ENSSSCG00000002684,ENSSSCG00000008490,…	--,SYNJ2BP,PECAM1,--,--,PAK2,C15orf62,ARHGEF11,--,PHACTR4,EPS8L2,CNKSR1,--,EPS8L1,CDC42EP1,PAK5,--,CTNNAL1,--,--,--,CDC42EP2,GNA12,RHOJ,HACD3,PAK1,ADGRG1,AGTR1,CDC42EP4,--,ROCK2,--,VANGL2,RHOA
GO:0030036	0.0114383	1	93	105	actin cytoskeleton organization	BP	ENSSSCG00000025114,ENSSSCG00000021189,ENSSSCG00000009448,ENSSSCG00000027155,ENSSSCG00000016604,ENSSSCG00000023292,ENSSSCG00000017836,ENSSSCG00000014430,ENSSSCG00000005706,ENSSSCG00000030260,ENSSSCG00000029691,ENSSSCG00000022624,ENSSSCG00000014399,ENSSSCG00000004962,ENSSSCG00000000748,ENSSSCG00000012517,ENSSSCG00000008721,ENSSSCG00000011265,ENSSSCG00000016656,ENSSSCG00000024418,ENSSSCG00000004434,…	FMNL3,--,--,KLHL17,WASL,INF2,PAFAH1B1,ABLIM3,ABL1,PFN2,CORO1A,--,ARHGAP26,CORO2B,IQSEC3,--,ABLIM2,XIRP1,--,RHOU,FRK,--,--,BCR,RAC1,FMNL1,--,SDAD1,ROCK1,BRK1,TMSB10,FMNL2,PAK2,--,CORO2A,SPIRE2,--,--,ABR,PFN1,--,PHACTR4,DAAM1,--,NUAK2,SDCBP,PAK5,GAS2L3,--,DIAPH2,NF1,RAC3,CDC42,DMTN,FOXJ1,CDC42EP2,KRAS,EHD2,MKL1,CAPZB,RHOJ,AMOT,PAK1,XIRP2,WASF2,ACTR2,FAM101B,SSH1,SLC9A3R1,IQSEC1,IQSEC2,SRF,--,--,FGD…
GO:0010466	0.0119142	1	26	30	negative regulation of peptidase activity	BP	ENSSSCG00000025987,ENSSSCG00000025328,ENSSSCG00000007384,ENSSSCG00000022290,ENSSSCG00000027244,ENSSSCG00000007405,ENSSSCG00000007407,ENSSSCG00000029121,ENSSSCG00000007421,ENSSSCG00000023837,ENSSSCG00000012101,ENSSSCG00000017557,ENSSSCG00000012960,ENSSSCG00000016233,ENSSSCG00000012792,ENSSSCG00000027357,ENSSSCG00000029230,ENSSSCG00000007387,ENSSSCG00000022913,ENSSSCG00000007121,ENSSSCG00000007122,…	--,--,--,UMODL1,SPINK1,--,WFDC8,WFDC10A,WFDC3,WFDC1,ANOS1,WFIKKN2,CST6,SERPINE2,RENBP,CSTB,ECM1,PI3,SLPI,CSTL1,CST11,--,CST8,--,CST3,CST7
GO:0031410	0.0119247	1	82	90	cytoplasmic vesicle	CC	ENSSSCG00000024800,ENSSSCG00000020851,ENSSSCG00000021346,ENSSSCG00000003795,ENSSSCG00000016611,ENSSSCG00000028008,ENSSSCG00000012746,ENSSSCG00000013044,ENSSSCG00000000625,ENSSSCG00000000293,ENSSSCG00000022723,ENSSSCG00000016897,ENSSSCG00000016553,ENSSSCG00000016634,ENSSSCG00000016635,ENSSSCG00000015079,ENSSSCG00000011794,ENSSSCG00000021193,ENSSSCG00000015481,ENSSSCG00000005308,ENSSSCG00000006498,…	DSC2,--,--,WLS,CADPS2,VAMP3,VMA21,FLRT1,LRP6,ITGA5,--,--,COPG2,CAV1,CAV2,BACE1,SENP2,AQP2,MYOC,RUSC2,RAB25,DLL1,PSMC5,--,RP2,TBC1D7,RUSC1,PRDX6,--,--,ITGB1,MLC1,MARCH2,SPAST,ATP2C2,LRRK2,TBC1D2,ACRBP,PRSS12,ADGRF5,IL1B1,MPDZ,SCG3,AMOTL1,GBP5,CXCR4,SLC9A6,SCGN,GAD2,MIB1,--,--,TLR9,COPS4,FLOT2,AMOT,DVL1,SPRED2,RAB11A,ARRDC2,EMP2,CCDC88A,CALY,EEA1,FES,ARRB2,GRM4,SNX9,PIKFYVE,HCRT,PDE6D,--,USP6NL,RAB…
GO:0050853	0.0122013	1	26	27	B cell receptor signaling pathway	BP	ENSSSCG00000008820,ENSSSCG00000026742,ENSSSCG00000021006,ENSSSCG00000027596,ENSSSCG00000022512,ENSSSCG00000027795,ENSSSCG00000005706,ENSSSCG00000022729,ENSSSCG00000017283,ENSSSCG00000020923,ENSSSCG00000008742,ENSSSCG00000027487,ENSSSCG00000010077,ENSSSCG00000004895,ENSSSCG00000027568,ENSSSCG00000012495,ENSSSCG00000014149,ENSSSCG00000010081,ENSSSCG00000007477,ENSSSCG00000007807,ENSSSCG00000006250,…	TEC,BTK,--,IGHE,TRDC,--,ABL1,KLHL6,CD79B,--,CD38,LAT2,--,BCL2,--,BTK,MEF2C,MAPK1,NFATC2,CD19,LYN,PLEKHA1,CD79A,LCK,PTPN6,BCAR1
GO:0046856	0.0123447	1	23	23	phosphatidylinositol dephosphorylation	BP	ENSSSCG00000012742,ENSSSCG00000025988,ENSSSCG00000012743,ENSSSCG00000009994,ENSSSCG00000006121,ENSSSCG00000030345,ENSSSCG00000010440,ENSSSCG00000023862,ENSSSCG00000026195,ENSSSCG00000014811,ENSSSCG00000024010,ENSSSCG00000016298,ENSSSCG00000002136,ENSSSCG00000006985,ENSSSCG00000012035,ENSSSCG00000010687,ENSSSCG00000014970,ENSSSCG00000010765,ENSSSCG00000030707,ENSSSCG00000021649,ENSSSCG00000012315,…	MTM1,--,MTMR1,MTMR3,TMEM55A,INPP5J,PTEN,--,--,INPPL1,--,INPP5D,TMEM55B,MTMR7,SYNJ1,INPP5F,MTMR2,--,--,--,--,INPP5B,OCRL
GO:0000188	0.0125092	1	16	16	inactivation of MAPK activity	BP	ENSSSCG00000027433,ENSSSCG00000022284,ENSSSCG00000010831,ENSSSCG00000016634,ENSSSCG00000016161,ENSSSCG00000010013,ENSSSCG00000011430,ENSSSCG00000016991,ENSSSCG00000004793,ENSSSCG00000010624,ENSSSCG00000008128,ENSSSCG00000008357,ENSSSCG00000029874,ENSSSCG00000015850,ENSSSCG00000020744,ENSSSCG00000023500	--,DUSP6,DUSP10,CAV1,--,--,DUSP7,DUSP1,SPRED1,DUSP5,DUSP2,SPRED2,DUSP14,DUSP4,DUSP3,DUSP21
GO:0043401	0.0126785	1	55	60	steroid hormone mediated signaling pathway	BP	ENSSSCG00000024987,ENSSSCG00000025777,ENSSSCG00000014401,ENSSSCG00000024896,ENSSSCG00000024975,ENSSSCG00000004978,ENSSSCG00000028326,ENSSSCG00000004576,ENSSSCG00000010814,ENSSSCG00000002619,ENSSSCG00000000006,ENSSSCG00000003551,ENSSSCG00000026909,ENSSSCG00000001474,ENSSSCG00000005385,ENSSSCG00000002388,ENSSSCG00000027017,ENSSSCG00000004384,ENSSSCG00000011594,ENSSSCG00000011890,ENSSSCG00000003211,…	NR3C2,ESR1,NR3C1,--,--,NR2E3,--,RORA,ESRRG,--,PPARA,PAQR7,--,RXRB,NR4A3,ESRRB,NR1D2,NR2E1,NR2C2,NR1I2,NR1H2,NR4A2,OR51E2,THRB,RXRG,PAQR8,BMP4,AR,RARB,GPER1,RARA,NR1H4,PPARD,THRA,--,--,ESR2,NR1I3,--,VDR,ABHD2,NR2C1,BMP7,NR2F1,GRAP2,PGR,HNF4A,NR2F2,RARG,NR2F6,--,NR6A1,RORC,NR1H3,ESRRA
GO:0007612	0.0131089	1	23	23	learning	BP	ENSSSCG00000021269,ENSSSCG00000000268,ENSSSCG00000002315,ENSSSCG00000008730,ENSSSCG00000010438,ENSSSCG00000010617,ENSSSCG00000024289,ENSSSCG00000029037,ENSSSCG00000008924,ENSSSCG00000006545,ENSSSCG00000029096,ENSSSCG00000007437,ENSSSCG00000007061,ENSSSCG00000014039,ENSSSCG00000002014,ENSSSCG00000002653,ENSSSCG00000022856,ENSSSCG00000011466,ENSSSCG00000022331,ENSSSCG00000012796,ENSSSCG00000003527,…	SHANK3,AAAS,SLC8A3,DRD5,ATAD1,SORCS3,--,--,UBA6,CHRNB2,HRH2,SLC12A5,PAK5,RGS14,JPH4,JPH3,--,ARF4,--,MECP2,EPHB2,RELN,VDAC1
GO:0001764	0.0138322	1	62	68	neuron migration	BP	ENSSSCG00000011524,ENSSSCG00000015370,ENSSSCG00000024070,ENSSSCG00000010170,ENSSSCG00000016612,ENSSSCG00000017836,ENSSSCG00000023501,ENSSSCG00000010390,ENSSSCG00000030353,ENSSSCG00000010429,ENSSSCG00000005730,ENSSSCG00000025906,ENSSSCG00000001091,ENSSSCG00000026383,ENSSSCG00000016662,ENSSSCG00000000300,ENSSSCG00000022168,ENSSSCG00000011277,ENSSSCG00000001924,ENSSSCG00000001945,ENSSSCG00000014328,…	CHL1,TWIST1,CDK5,DISC1,FEZF1,PAFAH1B1,CCKAR,DRGX,NDE1,PRKG1,BARHL1,--,KIAA0319,NRP2,TBX20,NEUROD4,APBB2,CCK,BBS4,NKX2-1,GFRA3,BARHL2,NRP1,--,GJA1,MAPT,--,DAB1,TUBB2B,NR4A2,ARX,UNK,ITGA3,PITX2,KIRREL3,DCX,TOP2B,CELSR3,POMGNT2,USP9X,MEF2C,FYN,MKL1,TLX3,--,--,SRF,--,GAS6,--,SEMA6A,NR2F2,CDK5R2,PEX5,BAX,FZD3,ASPM,ATOH1,GATA3,RELN,MYH10,CDK5R1
GO:0001917	0.0140607	1	20	20	photoreceptor inner segment	CC	ENSSSCG00000002296,ENSSSCG00000026922,ENSSSCG00000011590,ENSSSCG00000001924,ENSSSCG00000024725,ENSSSCG00000001042,ENSSSCG00000004622,ENSSSCG00000015406,ENSSSCG00000014876,ENSSSCG00000005490,ENSSSCG00000017223,ENSSSCG00000022026,ENSSSCG00000012379,ENSSSCG00000006823,ENSSSCG00000001762,ENSSSCG00000024609,ENSSSCG00000006255,ENSSSCG00000013630,ENSSSCG00000028373,ENSSSCG00000005641	RDH11,DRAM2,RHO,BBS4,C2orf71,MAK,GNB5,GNAT3,MYO7A,--,USH1G,AIPL1,ARR3,--,CIB2,GNAT1,RP1,DNM2,ENO2,--
GO:0070373	0.0149545	1	34	36	negative regulation of ERK1 and ERK2 cascade	BP	ENSSSCG00000022284,ENSSSCG00000005706,ENSSSCG00000009996,ENSSSCG00000014397,ENSSSCG00000005719,ENSSSCG00000026389,ENSSSCG00000009083,ENSSSCG00000000197,ENSSSCG00000030309,ENSSSCG00000010440,ENSSSCG00000017549,ENSSSCG00000012912,ENSSSCG00000003204,ENSSSCG00000021495,ENSSSCG00000003251,ENSSSCG00000025969,ENSSSCG00000014561,ENSSSCG00000001056,ENSSSCG00000009482,ENSSSCG00000015835,ENSSSCG00000026422,…	DUSP6,ABL1,LIF,SPRY4,RAPGEF1,SYNJ2BP,SPRY1,C1QL4,NDRG2,PTEN,--,TBC1D10C,VRK3,C3orf33,NLRP12,PTPRR,NLRP6,RANBP9,SPRY2,DUSP26,GPER1,TNIP1,ITGB1BP1,EZR,LMO3,--,TIMP3,ATF3,SLC9A3R1,LYN,DAB2IP,DUSP3,--,PTPN2
GO:0008021	0.0155097	1	51	56	synaptic vesicle	CC	ENSSSCG00000028008,ENSSSCG00000010170,ENSSSCG00000025964,ENSSSCG00000005250,ENSSSCG00000025170,ENSSSCG00000026571,ENSSSCG00000000948,ENSSSCG00000016928,ENSSSCG00000013774,ENSSSCG00000011723,ENSSSCG00000020653,ENSSSCG00000012292,ENSSSCG00000013848,ENSSSCG00000006829,ENSSSCG00000021906,ENSSSCG00000008036,ENSSSCG00000007768,ENSSSCG00000004125,ENSSSCG00000009555,ENSSSCG00000026822,ENSSSCG00000030363,…	VAMP3,DISC1,TOR1A,--,--,RAB8B,SYT1,RAB3C,--,MME,--,SYP,RAB8A,SYPL2,SYT7,SYNGR3,STX4,STX11,LAMP1,--,LGI3,SYNPR,LRRK2,--,SV2A,STX1B,VAMP1,STON2,SNAP25,RAB3D,COPS4,RAB3A,SYN2,APBA2,--,STX3,--,TRAPPC4,MT3,--,--,SYN1,RAB3B,SEPT5,--,--,STX1A,STX2,SV2B,SLC17A7,CLCN3
GO:0009306	0.0156262	1	24	25	protein secretion	BP	ENSSSCG00000017836,ENSSSCG00000000037,ENSSSCG00000026571,ENSSSCG00000016928,ENSSSCG00000013848,ENSSSCG00000008042,ENSSSCG00000004612,ENSSSCG00000027101,ENSSSCG00000009888,ENSSSCG00000029304,ENSSSCG00000008009,ENSSSCG00000013623,ENSSSCG00000024936,ENSSSCG00000013897,ENSSSCG00000023552,ENSSSCG00000007490,ENSSSCG00000006772,ENSSSCG00000025791,ENSSSCG00000004533,ENSSSCG00000002280,ENSSSCG00000017233,…	PAFAH1B1,ARFGAP3,RAB8B,RAB3C,RAB8A,--,RAB27A,--,ERP29,STEAP3,--,RAB3D,C1QTNF5,RAB3A,--,CBLN4,SVBP,MON1A,RAB27B,RAB15,RAB37,RAB3B,RAB10,--
GO:0005251	0.0158116	1	33	35	delayed rectifier potassium channel activity	MF	ENSSSCG00000027370,ENSSSCG00000021416,ENSSSCG00000025354,ENSSSCG00000022368,ENSSSCG00000023480,ENSSSCG00000016448,ENSSSCG00000028284,ENSSSCG00000027727,ENSSSCG00000005780,ENSSSCG00000005953,ENSSSCG00000008465,ENSSSCG00000003975,ENSSSCG00000006802,ENSSSCG00000003214,ENSSSCG00000030446,ENSSSCG00000002677,ENSSSCG00000000516,ENSSSCG00000029069,ENSSSCG00000006810,ENSSSCG00000007462,ENSSSCG00000021596,…	--,--,KCNA10,KCNS3,KCNA2,--,KCND1,--,--,--,KCNG3,KCNQ4,KCNA3,KCNC3,--,--,--,--,--,KCNB1,KCNA5,KCNA1,KCNA6,KCNG1,KCNE2,KCNV2,KCNQ5,KCNC1,KCNA7,--,--,KCNS1,KCNV1
GO:0006360	0.0159305	1	15	15	transcription from RNA polymerase I promoter	BP	ENSSSCG00000025298,ENSSSCG00000015372,ENSSSCG00000022507,ENSSSCG00000010833,ENSSSCG00000009310,ENSSSCG00000000116,ENSSSCG00000005347,ENSSSCG00000002680,ENSSSCG00000008098,ENSSSCG00000021472,ENSSSCG00000008226,ENSSSCG00000021180,ENSSSCG00000000461,ENSSSCG00000012839,ENSSSCG00000028007	--,--,POLR2H,TAF1A,POLR1D,POLR2F,POLR1E,TAF1C,POLR1B,POLR2E,POLR1A,POLR2K,POLR2L,--,POLR1C
GO:0000122	0.0161821	1	407	482	negative regulation of transcription from RNA polymerase II promoter	BP	ENSSSCG00000025705,ENSSSCG00000029375,ENSSSCG00000025053,ENSSSCG00000030553,ENSSSCG00000021560,ENSSSCG00000016591,ENSSSCG00000025452,ENSSSCG00000026092,ENSSSCG00000009034,ENSSSCG00000010993,ENSSSCG00000028391,ENSSSCG00000029201,ENSSSCG00000015370,ENSSSCG00000015371,ENSSSCG00000021529,ENSSSCG00000016612,ENSSSCG00000023455,ENSSSCG00000011810,ENSSSCG00000022155,ENSSSCG00000016883,ENSSSCG00000025592,…	--,ZNF205,--,CTNNBIP1,UBE2I,PAX4,--,SREBF2,--,--,--,AJUBA,TWIST1,FERD3L,KLF11,FEZF1,NFIX,--,RBPJ,ISL1,TP63,HOXD9,HIST1H1B,HOXD8,ZGPAT,ETV6,SMAD3,SALL2,DKK1,--,TGIF1,SALL1,BMP6,WHSC1,SKOR1,--,--,SNW1,CHCHD3,--,--,--,--,HBZ,BHLHE40,GFI1B,YEATS2,CAV1,--,YBX3
GO:0006886	0.0162586	1	235	276	intracellular protein transport	BP	ENSSSCG00000025163,ENSSSCG00000029045,ENSSSCG00000009010,ENSSSCG00000026239,ENSSSCG00000024434,ENSSSCG00000016593,ENSSSCG00000021346,ENSSSCG00000003795,ENSSSCG00000024070,ENSSSCG00000029828,ENSSSCG00000025041,ENSSSCG00000000290,ENSSSCG00000007167,ENSSSCG00000002295,ENSSSCG00000024839,ENSSSCG00000029330,ENSSSCG00000014101,ENSSSCG00000010306,ENSSSCG00000021148,ENSSSCG00000022723,ENSSSCG00000016897,…	--,--,ARFIP1,VPS35,AP2B1,ARF5,--,WLS,CDK5,RAB5B,--,COPZ1,VPS16,VTI1B,--,--,--,SEC24C,--,--,--,RAB9B,--,--,SAR1B,RAB2B,SEC24A,COPG2,--,--,--,ARL6,CH242-205G24.7,--,ARL5B,--,--,RAB8B,--,RAB4A,--,RAB3C,TMED2,CHML,AP1M1,AP2M1,RAB25,ACD,VPS11,TIMM17B,TMED10,AR
GO:0030414	0.0162605	1	27	31	peptidase inhibitor activity	MF	ENSSSCG00000025987,ENSSSCG00000025328,ENSSSCG00000007384,ENSSSCG00000022290,ENSSSCG00000005338,ENSSSCG00000027244,ENSSSCG00000007405,ENSSSCG00000014422,ENSSSCG00000007407,ENSSSCG00000029121,ENSSSCG00000007421,ENSSSCG00000023837,ENSSSCG00000000787,ENSSSCG00000012101,ENSSSCG00000017557,ENSSSCG00000012960,ENSSSCG00000012792,ENSSSCG00000000664,ENSSSCG00000007387,ENSSSCG00000022913,ENSSSCG00000007121,…	--,--,--,UMODL1,RECK,SPINK1,--,SPINK5,WFDC8,WFDC10A,WFDC3,WFDC1,--,ANOS1,WFIKKN2,CST6,RENBP,A2ML1,PI3,SLPI,CSTL1,CST11,--,CST8,--,CST3,CST7
GO:0045597	0.0167942	1	24	25	positive regulation of cell differentiation	BP	ENSSSCG00000029772,ENSSSCG00000016591,ENSSSCG00000009034,ENSSSCG00000030658,ENSSSCG00000009086,ENSSSCG00000000300,ENSSSCG00000016011,ENSSSCG00000009317,ENSSSCG00000030839,ENSSSCG00000005045,ENSSSCG00000012371,ENSSSCG00000006940,ENSSSCG00000013735,ENSSSCG00000007501,ENSSSCG00000001661,ENSSSCG00000004192,ENSSSCG00000007527,ENSSSCG00000029621,ENSSSCG00000011125,ENSSSCG00000006256,ENSSSCG00000007106,…	SOCS3,PAX4,--,SERPINF2,--,NEUROD4,NEUROD1,CDX2,JUN,BMP4,AR,CYR61,--,BMP7,SRF,CTGF,EDN3,BMPR1B,GATA3,SOX17,INSM1,WNT9A,NKX2-2,HSF4
GO:0016791	0.0170881	1	96	109	phosphatase activity	MF	ENSSSCG00000026431,ENSSSCG00000012742,ENSSSCG00000026764,ENSSSCG00000022284,ENSSSCG00000012743,ENSSSCG00000027884,ENSSSCG00000016614,ENSSSCG00000027557,ENSSSCG00000028805,ENSSSCG00000010831,ENSSSCG00000011546,ENSSSCG00000003807,ENSSSCG00000025379,ENSSSCG00000004690,ENSSSCG00000010435,ENSSSCG00000010440,ENSSSCG00000017642,ENSSSCG00000030289,ENSSSCG00000026816,ENSSSCG00000028034,ENSSSCG00000006347,…	ALPL,MTM1,PGAM5,DUSP6,MTMR1,--,PTPRZ1,CDC14B,--,DUSP10,MTMR14,DNAJC6,CTDSP2,--,MINPP1,PTEN,MTMR4,PTPN11,--,--,--,--,CTDSPL,--,PPP1CA,EPM2A,PTPRB,--,--,--,PTPRR,PTPN13,--,--,SSH3,PTPRH,--,DUSP7,DUPD1,--,PTPN9,DUSP1,DUSP13,PPP1CC,--,--,STYX,PTPRE,MTMR7,--,DUSP28,DUSP26,--,DUSP5,--,PPM1F,DUSP19,--,TNS3,--,MTMR2,DUSP2,EPHX2,--,PTPN5,NT5C,--,PTPN21,--,PTPRJ,CDC14A,SSH1,--,PTPRU,TIGAR,PTPN18,DUSP14,DUS…
GO:0006469	0.0171481	1	41	45	negative regulation of protein kinase activity	BP	ENSSSCG00000029772,ENSSSCG00000022488,ENSSSCG00000011414,ENSSSCG00000005285,ENSSSCG00000016432,ENSSSCG00000017259,ENSSSCG00000017647,ENSSSCG00000016459,ENSSSCG00000000625,ENSSSCG00000007208,ENSSSCG00000022748,ENSSSCG00000018057,ENSSSCG00000015136,ENSSSCG00000005358,ENSSSCG00000009401,ENSSSCG00000027855,ENSSSCG00000004878,ENSSSCG00000004236,ENSSSCG00000007684,ENSSSCG00000022689,ENSSSCG00000013534,…	SOCS3,--,--,--,--,PRKAR1A,PPM1E,EPHA1,LRP6,TRIB3,--,SOCS7,UBASH3B,--,RB1,SOCS1,SOCS6,--,PRKRIP1,GADD45B,MLLT1,FGFR1OP,NF1,TRIM27,SH3BP5,PPM1F,ITGB1BP1,SOCS5,--,DEPTOR,DVL1,PKIA,TAF7,SOCS2,TRIB1,PKIG,CEP85,PPP1R1B,--,AKT1S1,PARK7
GO:0017017	0.0177072	1	13	13	MAP kinase tyrosine/serine/threonine phosphatase activity	MF	ENSSSCG00000027433,ENSSSCG00000022284,ENSSSCG00000010831,ENSSSCG00000016161,ENSSSCG00000010013,ENSSSCG00000011430,ENSSSCG00000016991,ENSSSCG00000023063,ENSSSCG00000010624,ENSSSCG00000008128,ENSSSCG00000029874,ENSSSCG00000015850,ENSSSCG00000023500	--,DUSP6,DUSP10,--,--,DUSP7,DUSP1,--,DUSP5,DUSP2,DUSP14,DUSP4,DUSP21
GO:0007264	0.0182102	1	204	242	small GTPase mediated signal transduction	BP	ENSSSCG00000023697,ENSSSCG00000025163,ENSSSCG00000016593,ENSSSCG00000004924,ENSSSCG00000022787,ENSSSCG00000025645,ENSSSCG00000003797,ENSSSCG00000008835,ENSSSCG00000021660,ENSSSCG00000029828,ENSSSCG00000025041,ENSSSCG00000011416,ENSSSCG00000029208,ENSSSCG00000015383,ENSSSCG00000024839,ENSSSCG00000021148,ENSSSCG00000022918,ENSSSCG00000005719,ENSSSCG00000025890,ENSSSCG00000014305,ENSSSCG00000025610,…	REM2,--,ARF5,RASL12,RABIF,--,DIRAS3,RASL11B,--,RAB5B,--,DOCK3,ARL16,RAPGEF5,--,--,--,RAPGEF1,RAB9B,SAR1B,AGAP3,RALGDS,RAB2B,HRAS,--,ARL8B,--,--,VAV2,--,RASGRP3,BCAR3,--,--,VAV1,ARL6,IQGAP1,ARL5B,--,RAPGEF2,RAB8B,--,--,--,RHOH,REM1,RAB4A,RAP2B,RASGRF2,RAB3C,--,RAB25,RHOU,VAV3,ARL9,RHOF,--,GUF1,RAB6B,DNAJA3,RAB7A,RAB36,RAC1,RAB8A,RAB32,ARF6,RASGEF1B,ARL10,IFT22,SOS2,TRIM23,IFT27,RASGEF1A,RHOT1,RAB5…
GO:0048813	0.0190962	1	20	20	dendrite morphogenesis	BP	ENSSSCG00000016151,ENSSSCG00000024070,ENSSSCG00000015351,ENSSSCG00000006088,ENSSSCG00000027175,ENSSSCG00000028968,ENSSSCG00000006199,ENSSSCG00000011101,ENSSSCG00000014860,ENSSSCG00000008250,ENSSSCG00000009488,ENSSSCG00000012585,ENSSSCG00000020853,ENSSSCG00000029998,ENSSSCG00000004421,ENSSSCG00000000152,ENSSSCG00000003342,ENSSSCG00000001062,ENSSSCG00000005229,ENSSSCG00000008644	MAP2,CDK5,TMEM106B,SDC2,HPRT1,RAC1,PREX2,ITGB1,MAP6,--,SLITRK5,DCX,BTBD3,KLF7,FYN,RBFOX2,DVL1,DTNBP1,VLDLR,--
GO:0046872	0.0200436	1	1439	1742	metal ion binding	MF	ENSSSCG00000022911,ENSSSCG00000028188,ENSSSCG00000024279,ENSSSCG00000026449,ENSSSCG00000025705,ENSSSCG00000015606,ENSSSCG00000029375,ENSSSCG00000027549,ENSSSCG00000023138,ENSSSCG00000021139,ENSSSCG00000009521,ENSSSCG00000009520,ENSSSCG00000029597,ENSSSCG00000024331,ENSSSCG00000023305,ENSSSCG00000016152,ENSSSCG00000028676,ENSSSCG00000011574,ENSSSCG00000024911,ENSSSCG00000022110,ENSSSCG00000006216,…	--,--,--,KDM4A,--,--,ZNF205,--,--,--,ZIC5,ZIC2,TRIM52,--,--,--,--,--,--,TRIM41,TRIM55,--,--,--,--,--,ZNF322,DTX4,TRIM7,--,TRPS1,--,--,ZNF684,--,AIFM3,TRIM77,--,MMP25,--,ZNF800,NR3C2,RNF32,--,--,ZSCAN10,--,ZNF827,--,--,PDE7A,--,AJUBA,--,--,ARG2,--,LNX1,IKZ
GO:0001227	0.0202977	1	46	50	transcriptional repressor activity, RNA polymerase II transcription regulatory region sequence-specific binding	MF	ENSSSCG00000025705,ENSSSCG00000015371,ENSSSCG00000016612,ENSSSCG00000011810,ENSSSCG00000015982,ENSSSCG00000025130,ENSSSCG00000016545,ENSSSCG00000000633,ENSSSCG00000008720,ENSSSCG00000008727,ENSSSCG00000000950,ENSSSCG00000010219,ENSSSCG00000003900,ENSSSCG00000016754,ENSSSCG00000009317,ENSSSCG00000009370,ENSSSCG00000003846,ENSSSCG00000011487,ENSSSCG00000024970,ENSSSCG00000010472,ENSSSCG00000004387,…	--,FERD3L,FEZF1,--,HOXD9,--,CHCHD3,YBX3,HMX1,MSX1,E2F7,ARID5B,DMBX1,AEBP1,CDX2,FOXO1,GLIS1,--,ETV3,HHEX,FOXO3,--,ASCL3,PPARD,ZBTB33,MLX,ZBTB4,ZC3H8,PCBP3,JARID2,--,ARHGAP35,--,HES6,ISX,NACC1,NR2F6,ZBTB12,ZBTB6,--,--,SATB1,NFATC4,ETV7,BCL6B,TCF7
GO:0005484	0.0209949	1	38	42	SNAP receptor activity	MF	ENSSSCG00000010094,ENSSSCG00000028008,ENSSSCG00000030103,ENSSSCG00000002295,ENSSSCG00000029615,ENSSSCG00000025170,ENSSSCG00000025991,ENSSSCG00000016750,ENSSSCG00000015482,ENSSSCG00000004727,ENSSSCG00000026293,ENSSSCG00000020653,ENSSSCG00000015539,ENSSSCG00000007768,ENSSSCG00000004125,ENSSSCG00000029262,ENSSSCG00000011282,ENSSSCG00000016985,ENSSSCG00000005386,ENSSSCG00000007772,ENSSSCG00000030183,…	SNAP29,VAMP3,--,VTI1B,VAMP7,--,--,YKT6,VAMP4,SNAP23,STX5,--,STX6,STX4,STX11,GOSR1,SEC22C,BNIP1,STX17,STX1B,--,VAMP1,SNAP25,BET1L,STX3,--,STX12,STX10,--,--,--,STX7,--,--,VAMP8,STX1A,STX2,SNAP47
GO:0005242	0.0222657	1	17	17	inward rectifier potassium channel activity	MF	ENSSSCG00000010163,ENSSSCG00000017252,ENSSSCG00000017253,ENSSSCG00000012065,ENSSSCG00000012066,ENSSSCG00000016448,ENSSSCG00000000573,ENSSSCG00000025038,ENSSSCG00000015870,ENSSSCG00000015236,ENSSSCG00000021573,ENSSSCG00000003135,ENSSSCG00000000106,ENSSSCG00000012045,ENSSSCG00000006393,ENSSSCG00000027420,ENSSSCG00000013379	KCNK1,KCNJ2,KCNJ16,KCNJ6,KCNJ15,--,KCNJ8,KCNJ13,KCNJ3,KCNJ1,KCNJ5,KCNJ14,KCNJ4,KCNE2,KCNJ9,KCNJ10,KCNJ11
GO:0002062	0.0224519	1	31	33	chondrocyte differentiation	BP	ENSSSCG00000016520,ENSSSCG00000025523,ENSSSCG00000008725,ENSSSCG00000001710,ENSSSCG00000025551,ENSSSCG00000008606,ENSSSCG00000025261,ENSSSCG00000023261,ENSSSCG00000005045,ENSSSCG00000025238,ENSSSCG00000003017,ENSSSCG00000001473,ENSSSCG00000011326,ENSSSCG00000005101,ENSSSCG00000010360,ENSSSCG00000014149,ENSSSCG00000009278,ENSSSCG00000011606,ENSSSCG00000015733,ENSSSCG00000001556,ENSSSCG00000000182,…	CREB3L2,COL2A1,CYTL1,--,--,--,--,GDF5,BMP4,SHOX2,TGFB1,COL11A2,PTH1R,--,BMPR1A,MEF2C,FGF9,WNT7A,GLI2,MAPK14,WNT10B,OSR2,NOV,MATN1,SIX2,SOX9,WNT2B,BMPR1B,MEF2D,SNX19,FGFR1
GO:0001558	0.022483	1	32	34	regulation of cell growth	BP	ENSSSCG00000016178,ENSSSCG00000025982,ENSSSCG00000027830,ENSSSCG00000003687,ENSSSCG00000016900,ENSSSCG00000010912,ENSSSCG00000008723,ENSSSCG00000008913,ENSSSCG00000022429,ENSSSCG00000005360,ENSSSCG00000010678,ENSSSCG00000009401,ENSSSCG00000023837,ENSSSCG00000001382,ENSSSCG00000017472,ENSSSCG00000006329,ENSSSCG00000006940,ENSSSCG00000025912,ENSSSCG00000016729,ENSSSCG00000006206,ENSSSCG00000005946,…	--,--,--,EPB41L3,--,--,HTRA3,IGFBP7,KAZALD1,IGFBPL1,NANOS1,RB1,WFDC1,DDR1,IGFBP4,LMX1A,CYR61,URI1,--,--,--,STK11,BAP1,SGK1,IGFBP6,SGK2,HTRA1,NOV,CTGF,WISP2,FAM107A,--
GO:0006357	0.0234262	1	327	393	regulation of transcription from RNA polymerase II promoter	BP	ENSSSCG00000027186,ENSSSCG00000021644,ENSSSCG00000006276,ENSSSCG00000025705,ENSSSCG00000028059,ENSSSCG00000021932,ENSSSCG00000022323,ENSSSCG00000022755,ENSSSCG00000029194,ENSSSCG00000027648,ENSSSCG00000012741,ENSSSCG00000016410,ENSSSCG00000025171,ENSSSCG00000002906,ENSSSCG00000024549,ENSSSCG00000016612,ENSSSCG00000022921,ENSSSCG00000023417,ENSSSCG00000000289,ENSSSCG00000022155,ENSSSCG00000022318,…	--,BRD7,CEBPD,--,--,FOXB1,--,--,--,TRPS1,MAMLD1,MNX1,--,ETV2,--,FEZF1,FOXN1,--,NFE2,RBPJ,ERG,--,--,--,ETV5,TCEAL7,--,TCEAL9,CH242-51F15.2,TCEAL1,--,ETV6,RFXANK,PRDM12,SMAD3,ETV1,--,SP7,--,--,NFE2L2,MED27,ANKRD1,SP1,BARHL1,MED15,MLXIP,--,--,--,--,HES1,TADA
GO:0008138	0.0239692	1	42	46	protein tyrosine/serine/threonine phosphatase activity	MF	ENSSSCG00000022284,ENSSSCG00000027884,ENSSSCG00000027557,ENSSSCG00000010831,ENSSSCG00000007232,ENSSSCG00000010440,ENSSSCG00000006347,ENSSSCG00000005447,ENSSSCG00000005449,ENSSSCG00000004122,ENSSSCG00000016161,ENSSSCG00000021704,ENSSSCG00000008083,ENSSSCG00000010013,ENSSSCG00000027956,ENSSSCG00000021538,ENSSSCG00000011430,ENSSSCG00000010317,ENSSSCG00000016991,ENSSSCG00000010318,ENSSSCG00000029128,…	DUSP6,--,CDC14B,DUSP10,--,PTEN,--,--,--,EPM2A,--,--,--,--,SSH3,--,DUSP7,DUPD1,DUSP1,DUSP13,--,--,STYX,DUSP28,DUSP26,--,--,DUSP5,--,DUSP19,--,DUSP2,CDC14A,SSH1,--,DUSP14,DUSP4,--,--,DUSP3,DUSP21,DUSP23
GO:0006979	0.0244762	1	64	72	response to oxidative stress	BP	ENSSSCG00000022102,ENSSSCG00000009048,ENSSSCG00000017630,ENSSSCG00000010391,ENSSSCG00000005706,ENSSSCG00000021973,ENSSSCG00000026759,ENSSSCG00000006891,ENSSSCG00000011549,ENSSSCG00000029385,ENSSSCG00000025035,ENSSSCG00000002754,ENSSSCG00000016934,ENSSSCG00000015282,ENSSSCG00000016109,ENSSSCG00000026414,ENSSSCG00000024423,ENSSSCG00000014855,ENSSSCG00000023369,ENSSSCG00000016983,ENSSSCG00000000784,…	--,GAB1,EPX,ERCC6,ABL1,GPX8,HMOX1,GCLM,OGG1,LIAS,--,NQO1,ERCC8,PPP1R15B,ALS2,ATOX1,--,RPS3,MSRB1,STC2,LRRK2,XPA,--,PRNP,MSRA,--,PSIP1,TRPM2,GPX7,BCL2,SIRT1,GCLC,--,PRDX1,PRDX3,DGKK,--,ERCC3,GPX6,MPO,--,GPX5,--,HNF1A,WRN,LPO,PRDX2,DUOX2,TXNIP,MSRB2,DHCR24,
GO:0016032	0.0247853	1	17	17	viral process	BP	ENSSSCG00000022115,ENSSSCG00000029423,ENSSSCG00000021600,ENSSSCG00000024066,ENSSSCG00000030090,ENSSSCG00000028224,ENSSSCG00000026126,ENSSSCG00000024446,ENSSSCG00000029495,ENSSSCG00000026997,ENSSSCG00000024303,ENSSSCG00000022818,ENSSSCG00000017950,ENSSSCG00000027068,ENSSSCG00000027759,ENSSSCG00000024833,ENSSSCG00000023152	--,--,--,--,--,--,--,--,--,--,--,--,TP53,--,--,--,--
GO:0005769	0.0251515	1	95	107	early endosome	CC	ENSSSCG00000026239,ENSSSCG00000003795,ENSSSCG00000020672,ENSSSCG00000014091,ENSSSCG00000021660,ENSSSCG00000029828,ENSSSCG00000010647,ENSSSCG00000028512,ENSSSCG00000000359,ENSSSCG00000007167,ENSSSCG00000016626,ENSSSCG00000000625,ENSSSCG00000005719,ENSSSCG00000026097,ENSSSCG00000030139,ENSSSCG00000029691,ENSSSCG00000022133,ENSSSCG00000001091,ENSSSCG00000026130,ENSSSCG00000007930,ENSSSCG00000004578,…	VPS35,WLS,F2R,F2RL1,--,RAB5B,ADRB1,LDLR,BLOC1S1,VPS16,CFTR,LRP6,RAPGEF1,LAMP3,SDCCAG3,CORO1A,--,KIAA0319,EPHA3,MGRN1,ANXA2,TRAK1,VPS11,ANGPTL3,RUSC1,VPS26A,--,TBC1D16,LMTK2,SNX12,RAB32,ATP6V0D1,--,--,ALS2,SNX13,STX6,LDLRAP1,MLC1,RAB5C,VPS18,SORT1,NRP1,TGFBRAP1,RAB21,--,MYO5A,SNX3,SNX27,--,--,NTRK1,CXCR4,FGD2,PRDX3,--,FAM109A,DERL1,SLC9A6,GPER1,USP8,RHOB,VPS28,CHMP1A,WDFY1,SNX17,INPP5F,TMEM127,EHD…
GO:0022841	0.0259889	1	15	15	potassium ion leak channel activity	MF	ENSSSCG00000010163,ENSSSCG00000013031,ENSSSCG00000010667,ENSSSCG00000024337,ENSSSCG00000002432,ENSSSCG00000024324,ENSSSCG00000005077,ENSSSCG00000027881,ENSSSCG00000008427,ENSSSCG00000012986,ENSSSCG00000023451,ENSSSCG00000002423,ENSSSCG00000007377,ENSSSCG00000025423,ENSSSCG00000001592	KCNK1,KCNK4,--,--,KCNK13,TMEM175,--,KCNK6,KCNK12,--,--,KCNK10,KCNK15,KCNK5,KCNK17
GO:0030322	0.0263555	1	15	15	stabilization of membrane potential	BP	ENSSSCG00000010163,ENSSSCG00000013031,ENSSSCG00000010667,ENSSSCG00000024337,ENSSSCG00000002432,ENSSSCG00000005077,ENSSSCG00000027881,ENSSSCG00000008427,ENSSSCG00000012986,ENSSSCG00000023451,ENSSSCG00000002423,ENSSSCG00000003069,ENSSSCG00000007377,ENSSSCG00000025423,ENSSSCG00000001592	KCNK1,KCNK4,--,--,KCNK13,--,KCNK6,KCNK12,--,--,KCNK10,KCNN4,KCNK15,KCNK5,KCNK17
GO:0050681	0.0266653	1	17	17	androgen receptor binding	MF	ENSSSCG00000022575,ENSSSCG00000029119,ENSSSCG00000014394,ENSSSCG00000017260,ENSSSCG00000000068,ENSSSCG00000008221,ENSSSCG00000001509,ENSSSCG00000005902,ENSSSCG00000013629,ENSSSCG00000014768,ENSSSCG00000013783,ENSSSCG00000004174,ENSSSCG00000024064,ENSSSCG00000013746,ENSSSCG00000003531,ENSSSCG00000014044,ENSSSCG00000003385	PRMT2,PRPF6,RNF14,WIPI1,EP300,KDM3A,DAXX,FOXH1,--,TRIM68,--,TCF21,RNF6,CALR,KDM1A,NSD1,PARK7
GO:0055038	0.027094	1	23	24	recycling endosome membrane	CC	ENSSSCG00000024943,ENSSSCG00000000036,ENSSSCG00000014103,ENSSSCG00000022133,ENSSSCG00000011722,ENSSSCG00000013848,ENSSSCG00000005012,ENSSSCG00000020666,ENSSSCG00000000118,ENSSSCG00000016328,ENSSSCG00000006982,ENSSSCG00000001892,ENSSSCG00000012698,ENSSSCG00000009506,ENSSSCG00000005944,ENSSSCG00000017747,ENSSSCG00000002921,ENSSSCG00000007062,ENSSSCG00000007994,ENSSSCG00000023371,ENSSSCG00000022696,…	EHD3,PACSIN2,SCAMP1,--,RAP2B,RAB8A,ARF6,--,MICALL1,--,ZDHHC2,SCAMP2,SLC9A6,--,NDRG1,RAB11FIP4,CLIP3,LAMP5,--,EHD2,RAB11A,RAP2C,SCAMP5
GO:0030326	0.0275207	1	38	41	embryonic limb morphogenesis	BP	ENSSSCG00000015370,ENSSSCG00000029407,ENSSSCG00000025592,ENSSSCG00000010428,ENSSSCG00000027615,ENSSSCG00000008789,ENSSSCG00000027312,ENSSSCG00000008727,ENSSSCG00000006696,ENSSSCG00000029590,ENSSSCG00000022980,ENSSSCG00000000837,ENSSSCG00000025578,ENSSSCG00000023261,ENSSSCG00000003021,ENSSSCG00000008311,ENSSSCG00000009148,ENSSSCG00000015715,ENSSSCG00000016698,ENSSSCG00000013248,ENSSSCG00000012870,…	TWIST1,SP8,TP63,DKK1,--,WDR19,PTCH1,MSX1,GJA5,ACD,TBX4,CHST11,--,GDF5,MEGF8,CYP26B1,LEF1,EN1,HOXA11,LRP4,FGF4,BMP4,GREM1,SHOX2,PBX1,FRAS1,HNF1A,FGF9,WNT7A,PBX2,HOXD13,WNT5A,SALL4,HOXD10,C2CD3,TBX5,BMP7,FGFR1
GO:0042474	0.0275227	1	15	15	middle ear morphogenesis	BP	ENSSSCG00000016420,ENSSSCG00000008727,ENSSSCG00000015997,ENSSSCG00000001050,ENSSSCG00000024594,ENSSSCG00000008606,ENSSSCG00000004861,ENSSSCG00000002490,ENSSSCG00000016706,ENSSSCG00000005087,ENSSSCG00000017400,ENSSSCG00000006073,ENSSSCG00000008446,ENSSSCG00000017239,ENSSSCG00000015815	INSIG1,MSX1,PRKRA,EDN1,NKX3-2,--,TSHZ1,GSC,HOXA2,SIX1,NAGLU,OSR2,SIX2,RPL38,FGFR1
GO:0016746	0.0275662	1	63	70	transferase activity, transferring acyl groups	MF	ENSSSCG00000002828,ENSSSCG00000005671,ENSSSCG00000008763,ENSSSCG00000010175,ENSSSCG00000024571,ENSSSCG00000010392,ENSSSCG00000022364,ENSSSCG00000021464,ENSSSCG00000005829,ENSSSCG00000011301,ENSSSCG00000012426,ENSSSCG00000000068,ENSSSCG00000002778,ENSSSCG00000015391,ENSSSCG00000008268,ENSSSCG00000003561,ENSSSCG00000017339,ENSSSCG00000001435,ENSSSCG00000008121,ENSSSCG00000005918,ENSSSCG00000010138,…	LPCAT2,CRAT,--,GNPAT,--,CHAT,CPT1B,SOAT1,AGPAT2,ZDHHC3,ZDHHC15,EP300,ZDHHC1,CROT,AUP1,ZDHHC18,NMT1,AGPAT1,GPAT2,DGAT1,ZDHHC8,--,--,ZDHHC2,ZDHHC19,CPT2,ZDHHC22,PDHX,GPAT3,--,ZDHHC5,LPCAT4,ZDHHC20,--,--,ALAS1,LCLAT1,ZDHHC23,ATE1,GPAT4,ACAA2,DLAT,DLST,LPCAT1,--,AGPAT4,GPAM,HADHB,--,CPT1C,SOAT2,--,--,NMT2,LPGAT1,ZDHHC14,--,--,--,ZDHHC7,ALAS2,ZDHHC12,SAT1
GO:0015629	0.0276169	1	113	129	actin cytoskeleton	CC	ENSSSCG00000021102,ENSSSCG00000010925,ENSSSCG00000027155,ENSSSCG00000010447,ENSSSCG00000000289,ENSSSCG00000010454,ENSSSCG00000016535,ENSSSCG00000005706,ENSSSCG00000010304,ENSSSCG00000009203,ENSSSCG00000008944,ENSSSCG00000008858,ENSSSCG00000010597,ENSSSCG00000017142,ENSSSCG00000029691,ENSSSCG00000022624,ENSSSCG00000004962,ENSSSCG00000011552,ENSSSCG00000008721,ENSSSCG00000016817,ENSSSCG00000005302,…	MAEA,PPP1R12B,KLHL17,ACTA2,NFE2,IFIT5,CALD1,ABL1,MYOZ1,SNCA,NPFFR2,KLHL2,TAF5,BAIAP2,CORO1A,--,CORO2B,ARPC4,ABLIM2,TARS,STOML2,WIPF1,TCERG1,PFN4,HSPB7,CLIC5,RAI14,ANLN,--,NDC1,VCL,--,DENND2A,DDX58,FHL2,NCAPG,NMT1,--,MSRB1,--,CORO2A,SEPT9,MSRA,--,SYNPO2,--,MYH9,--,C10orf90,C9orf72,MYL2,NCOA5,ANKRD23,KPTN,SPPL2B,STK38L,CDC42EP1,RARA,TWF1,C19orf35,GAS2L3,MAP7D3,ARPC2,KLHL33,ARPC1A,CENPQ,PPP1R9B,PDLI…
GO:0007602	0.0276229	1	12	12	phototransduction	BP	ENSSSCG00000029523,ENSSSCG00000011590,ENSSSCG00000016580,ENSSSCG00000010350,ENSSSCG00000028770,ENSSSCG00000010358,ENSSSCG00000002811,ENSSSCG00000024609,ENSSSCG00000001636,ENSSSCG00000001637,ENSSSCG00000014852,ENSSSCG00000012906	--,RHO,OPN1SW,RGR,RCVRN,OPN4,CNGB1,GNAT1,GUCA1A,GUCA1B,ARRB1,CABP4
GO:0001843	0.0276408	1	54	59	neural tube closure	BP	ENSSSCG00000009004,ENSSSCG00000015370,ENSSSCG00000010457,ENSSSCG00000000625,ENSSSCG00000029385,ENSSSCG00000027312,ENSSSCG00000025568,ENSSSCG00000025620,ENSSSCG00000009772,ENSSSCG00000011589,ENSSSCG00000000766,ENSSSCG00000008738,ENSSSCG00000003539,ENSSSCG00000010586,ENSSSCG00000001924,ENSSSCG00000006928,ENSSSCG00000009142,ENSSSCG00000007401,ENSSSCG00000017414,ENSSSCG00000004759,ENSSSCG00000002954,…	SFRP2,TWIST1,KIF20B,LRP6,LIAS,PTCH1,TEAD2,PRICKLE1,TMED2,--,CECR2,CC2D2A,GRHL3,SUFU,BBS4,LMO4,SEC24B,SDC4,KAT2A,--,--,PRKACA,MED12,CITED2,GRHL2,PFN1,MTHFD1,RALA,SHROOM3,ZEB2,PHACTR4,BMP4,RARA,DEAF1,--,SFRP1,ADM,SETD2,WNT5A,MKS1,SALL4,ARHGAP35,IFT172,PTK7,ST14,TULP3,RARG,RGMA,FUZ,LHX2,FZD6,FZD3,VANGL2,TRAF6
GO:0017049	0.0278663	1	15	15	GTP-Rho binding	MF	ENSSSCG00000024626,ENSSSCG00000023269,ENSSSCG00000022882,ENSSSCG00000001805,ENSSSCG00000004763,ENSSSCG00000026108,ENSSSCG00000021359,ENSSSCG00000008490,ENSSSCG00000012996,ENSSSCG00000013783,ENSSSCG00000023105,ENSSSCG00000001977,ENSSSCG00000017245,ENSSSCG00000008629,ENSSSCG00000022075	TNFAIP1,EXOC1,--,WHAMM,C15orf62,CDC42EP1,--,--,CDC42EP2,--,NET1,STXBP6,CDC42EP4,ROCK2,KCTD13
GO:0015459	0.029587	1	21	22	potassium channel regulator activity	MF	ENSSSCG00000016423,ENSSSCG00000004546,ENSSSCG00000021165,ENSSSCG00000023934,ENSSSCG00000025810,ENSSSCG00000012582,ENSSSCG00000010570,ENSSSCG00000011761,ENSSSCG00000004919,ENSSSCG00000029240,ENSSSCG00000006206,ENSSSCG00000012045,ENSSSCG00000012049,ENSSSCG00000017003,ENSSSCG00000017005,ENSSSCG00000021443,ENSSSCG00000024325,ENSSSCG00000029323,ENSSSCG00000006826,ENSSSCG00000020749,ENSSSCG00000007385	--,SUMO1,ADRB2,KCNIP4,KCNAB1,KCNE5,KCNIP2,--,NEDD4L,--,--,KCNE2,--,KCNIP1,KCNMB1,SGK1,SGK2,KCNE3,AMIGO1,KCNAB2,KCNS1
GO:0016055	0.0311311	1	75	84	Wnt signaling pathway	BP	ENSSSCG00000009004,ENSSSCG00000030553,ENSSSCG00000003795,ENSSSCG00000002906,ENSSSCG00000010931,ENSSSCG00000016617,ENSSSCG00000000625,ENSSSCG00000008854,ENSSSCG00000014435,ENSSSCG00000016628,ENSSSCG00000021398,ENSSSCG00000004558,ENSSSCG00000024793,ENSSSCG00000027278,ENSSSCG00000005288,ENSSSCG00000000759,ENSSSCG00000025374,ENSSSCG00000008241,ENSSSCG00000021798,ENSSSCG00000011642,ENSSSCG00000003204,…	SFRP2,CTNNBIP1,WLS,ETV2,KLHL12,WNT16,LRP6,CPE,CSNK1A1,WNT2,WNT9B,CSNK1G1,PORCN,ARL6,TLE4,--,DVL3,TCF7L1,LZTS2,RYK,VRK3,PYGO1,LEF1,FZD10,GSK3B,--,KREMEN1,MACF1,CSNK1G3,--,LRP4,APC,DRAXIN,FRZB,CCNE1,PITX2,LDB1,--,DDB1,WNT7B,--,DDX3X,CCDC88C,FZD7,SFRP1,WNT7A,DIXDC1,VRK2,WNT5A,VRK1,FZD5,CSNK1E,DVL1,SFRP5,CSNK1G2,FZD9,WNT10B,CSNK1D,TNKS,STRN,WNT1,--,NDP,WNT8B,APC2,FZD4,WNT2B,--,TCF7L2,FZD6,FZD3,WNT3A,…
GO:0045111	0.0311874	1	34	36	intermediate filament cytoskeleton	CC	ENSSSCG00000007187,ENSSSCG00000006927,ENSSSCG00000001402,ENSSSCG00000009720,ENSSSCG00000011033,ENSSSCG00000017192,ENSSSCG00000017343,ENSSSCG00000021363,ENSSSCG00000011678,ENSSSCG00000003484,ENSSSCG00000017865,ENSSSCG00000010595,ENSSSCG00000017205,ENSSSCG00000000250,ENSSSCG00000017100,ENSSSCG00000010605,ENSSSCG00000015558,ENSSSCG00000000241,ENSSSCG00000005110,ENSSSCG00000024610,ENSSSCG00000026761,…	NSFL1C,PKN2,NFKBIL1,DDX60,VIM,EVPL,GFAP,CHD3,XRN1,PADI6,CTNS,INA,SAP30BP,KRT2,MTRR,OBFC1,SMG7,KRT84,SYNE2,KRT4,CCT8,ERAL1,TRIM29,STAG2,SMARCA2,CLK3,FAAP100,ZNF175,STUB1,NFATC4,SEC62,KRT36,KRT13,DES
GO:0005578	0.0313845	1	156	181	proteinaceous extracellular matrix	CC	ENSSSCG00000016848,ENSSSCG00000025471,ENSSSCG00000008032,ENSSSCG00000026431,ENSSSCG00000025982,ENSSSCG00000016614,ENSSSCG00000022506,ENSSSCG00000016617,ENSSSCG00000025523,ENSSSCG00000002314,ENSSSCG00000015326,ENSSSCG00000027622,ENSSSCG00000016628,ENSSSCG00000015626,ENSSSCG00000024954,ENSSSCG00000021398,ENSSSCG00000021241,ENSSSCG00000012766,ENSSSCG00000005751,ENSSSCG00000016816,ENSSSCG00000004980,…	EGFLAM,--,--,ALPL,--,PTPRZ1,--,WNT16,COL2A1,--,COL1A2,--,WNT2,VWC2,FGF1,WNT9B,ADAMTS13,BGN,COL5A1,ADAMTS12,--,LTBP1,GLG1,--,COL4A6,TECTA,GFOD2,--,TGFBI,SPARCL1,COL10A1,COCH,COL4A1,KCNIP3,VCAN,PRELP,KAZALD1,--,ADAMTS6,CRISPLD2,COL26A1,SPARC,LOX,VWA1,SPOCK3,THBS2,GPC2,SLIT2,POSTN,KCNIP4,COL6A3,--,HAPLN1,EMILIN1,SLIT1,--,--,--,NID2,COL5A3,PAPLN,ANGPTL4,--,AMTN,EMID1,GPC1,AMBN,--,--,ENAM,TNN,COL6A5,A…
GO:0019003	0.0317893	1	37	40	GDP binding	MF	ENSSSCG00000021660,ENSSSCG00000029828,ENSSSCG00000021148,ENSSSCG00000025890,ENSSSCG00000011535,ENSSSCG00000026571,ENSSSCG00000010192,ENSSSCG00000011722,ENSSSCG00000008733,ENSSSCG00000011615,ENSSSCG00000013848,ENSSSCG00000016948,ENSSSCG00000017412,ENSSSCG00000011233,ENSSSCG00000006232,ENSSSCG00000004612,ENSSSCG00000000511,ENSSSCG00000029741,ENSSSCG00000013013,ENSSSCG00000008598,ENSSSCG00000026269,…	--,RAB5B,--,RAB9B,ARL8B,RAB8B,RAB4A,RAP2B,--,RAB7A,RAB8A,TRIM23,RAB5C,DYNC1LI1,--,RAB27A,RAB21,RALA,ARL2,RHOB,RAB29,RRAS,GEM,RAB35,SRP54,RAB27B,RAB22A,RAB3B,RAB10,RAB14,RAP2C,--,RAB9A,RALB,RHOA,RRAGC,RAB18
GO:0034599	0.0319771	1	29	31	cellular response to oxidative stress	BP	ENSSSCG00000029275,ENSSSCG00000023229,ENSSSCG00000009203,ENSSSCG00000015987,ENSSSCG00000005724,ENSSSCG00000025217,ENSSSCG00000005774,ENSSSCG00000000754,ENSSSCG00000015997,ENSSSCG00000011563,ENSSSCG00000009370,ENSSSCG00000005454,ENSSSCG00000000784,ENSSSCG00000000144,ENSSSCG00000004387,ENSSSCG00000023660,ENSSSCG00000015871,ENSSSCG00000010682,ENSSSCG00000029052,ENSSSCG00000001214,ENSSSCG00000004826,…	PPARGC1A,ETV5,SNCA,NFE2L2,SETX,--,ADNP2,RAD52,PRKRA,FANCD2,FOXO1,--,LRRK2,TXN2,FOXO3,PARP1,NR4A2,PRDX3,TXNDC2,GPX5,VIMP,PRDX2,VRK2,MT3,G6PD,TXNL1,SIRT2,PINK1,PARK7
GO:0005212	0.0322894	1	12	12	structural constituent of eye lens	MF	ENSSSCG00000023498,ENSSSCG00000011796,ENSSSCG00000011033,ENSSSCG00000011978,ENSSSCG00000015025,ENSSSCG00000009955,ENSSSCG00000000400,ENSSSCG00000007084,ENSSSCG00000028368,ENSSSCG00000003232,ENSSSCG00000011636,ENSSSCG00000009964	--,CRYGS,VIM,CPOX,CRYAB,CRYBB2,MIP,--,CRYGB,LIM2,BFSP2,CRYBB1
GO:1903146	0.032357	1	18	18	regulation of mitophagy	BP	ENSSSCG00000026092,ENSSSCG00000025893,ENSSSCG00000020879,ENSSSCG00000030430,ENSSSCG00000011779,ENSSSCG00000010327,ENSSSCG00000017165,ENSSSCG00000017414,ENSSSCG00000010138,ENSSSCG00000002804,ENSSSCG00000006647,ENSSSCG00000011575,ENSSSCG00000011762,ENSSSCG00000016140,ENSSSCG00000016036,ENSSSCG00000000611,ENSSSCG00000009658,ENSSSCG00000014296	SREBF2,ZBTB17,--,RPL28,PARL,POLR3A,USP36,KAT2A,ZDHHC8,CSNK2A2,CTSK,ATG7,ACTL6A,FZD5,WDR75,WBP11,BNIP3L,VDAC1
GO:0007204	0.0325046	1	40	44	positive regulation of cytosolic calcium ion concentration	BP	ENSSSCG00000020672,ENSSSCG00000014091,ENSSSCG00000015320,ENSSSCG00000027757,ENSSSCG00000023868,ENSSSCG00000005706,ENSSSCG00000021344,ENSSSCG00000024674,ENSSSCG00000025846,ENSSSCG00000024428,ENSSSCG00000001050,ENSSSCG00000017189,ENSSSCG00000023592,ENSSSCG00000023559,ENSSSCG00000008588,ENSSSCG00000011802,ENSSSCG00000017076,ENSSSCG00000009661,ENSSSCG00000017554,ENSSSCG00000017392,ENSSSCG00000028731,…	F2R,F2RL1,CALCR,FIS1,C3AR1,ABL1,--,ABL2,CCR8,CHRNA9,EDN1,GALR2,TAC1,GALR1,FKBP1B,--,NMUR2,ADRA1A,TAC4,CCR10,CXCL13,GPER1,CHRNA10,GPR6,SPPL3,BCAP31,C1QTNF1,HMGB1,CCR1,GPR3,CALCA,SWAP70,ADCY5,AGTR1,CIB2,HRH4,GNA15,--,ADRA1D,GLP1R
GO:0006955	0.0326947	1	205	257	immune response	BP	ENSSSCG00000021378,ENSSSCG00000016856,ENSSSCG00000016859,ENSSSCG00000024682,ENSSSCG00000016861,ENSSSCG00000024439,ENSSSCG00000013415,ENSSSCG00000024626,ENSSSCG00000002053,ENSSSCG00000026675,ENSSSCG00000002055,ENSSSCG00000002057,ENSSSCG00000022761,ENSSSCG00000022057,ENSSSCG00000010448,ENSSSCG00000023346,ENSSSCG00000025872,ENSSSCG00000009051,ENSSSCG00000001341,ENSSSCG00000002097,ENSSSCG00000002100,…	--,C9,C7,--,C6,PTGER4,AZU1,TNFAIP1,TRDV2,--,--,--,--,--,FAS,--,--,IL15,SLA-11,TRAV14DV4,TRAV9-1,SMAD6,SMAD3,IL-6,BMP6,TLR6,TNFSF13B,LIF,IL6,--,--,OSM,IL21,IFNG,CXCL8,--,TNFSF13,--,VAV1,--,PPBP,PF4,ULBP1,CXCL2,--,--,CCR8,CXCL14,SLA-DOA,--,TNFRSF9,TNFSF14,O
GO:0007080	0.0329025	1	25	26	mitotic metaphase plate congression	BP	ENSSSCG00000006214,ENSSSCG00000030252,ENSSSCG00000015050,ENSSSCG00000010995,ENSSSCG00000029362,ENSSSCG00000017140,ENSSSCG00000010912,ENSSSCG00000013332,ENSSSCG00000011997,ENSSSCG00000014325,ENSSSCG00000013008,ENSSSCG00000001510,ENSSSCG00000007272,ENSSSCG00000004893,ENSSSCG00000029326,ENSSSCG00000009692,ENSSSCG00000006832,ENSSSCG00000023677,ENSSSCG00000023296,ENSSSCG00000016234,ENSSSCG00000017514,…	RRS1,SEH1L,ZW10,CHMP5,CHMP2A,CHMP6,--,KIF18A,CHMP2B,CDC23,CDCA5,--,CHMP4B,VPS4B,CCNB1,PINX1,PSRC1,CHMP1A,CENPE,--,KPNB1,RAB11A,KIF2C,CHMP4C,KIF22
GO:0008327	0.0332276	1	14	14	methyl-CpG binding	MF	ENSSSCG00000002307,ENSSSCG00000030045,ENSSSCG00000027786,ENSSSCG00000012608,ENSSSCG00000022107,ENSSSCG00000026636,ENSSSCG00000004516,ENSSSCG00000004528,ENSSSCG00000013659,ENSSSCG00000006790,ENSSSCG00000012796,ENSSSCG00000013562,ENSSSCG00000013559,ENSSSCG00000013435	ERH,PRMT5,ZBTB21,ZBTB33,CHTOP,ZBTB4,MBD1,MBD2,DNMT1,WDR77,MECP2,--,--,MBD3
GO:0007265	0.0332336	1	26	27	Ras protein signal transduction	BP	ENSSSCG00000015052,ENSSSCG00000026120,ENSSSCG00000027971,ENSSSCG00000025591,ENSSSCG00000008509,ENSSSCG00000009094,ENSSSCG00000000373,ENSSSCG00000030839,ENSSSCG00000009401,ENSSSCG00000006645,ENSSSCG00000029741,ENSSSCG00000004791,ENSSSCG00000009612,ENSSSCG00000028387,ENSSSCG00000001513,ENSSSCG00000023991,ENSSSCG00000006237,ENSSSCG00000017748,ENSSSCG00000026969,ENSSSCG00000017753,ENSSSCG00000007811,…	USP28,--,RFXANK,HRAS,RASGRP3,CCNA2,CDK2,JUN,RB1,SETDB1,RALA,RASGRP1,DOK2,CNKSR1,SYNGAP1,RIT1,SDCBP,NF1,KRAS,KSR1,LAT,TP53,DNMT1,IQGAP3,RALB,RASSF1
GO:0031982	0.0332921	1	64	71	vesicle	CC	ENSSSCG00000008758,ENSSSCG00000021289,ENSSSCG00000002295,ENSSSCG00000026097,ENSSSCG00000015335,ENSSSCG00000010192,ENSSSCG00000016928,ENSSSCG00000004578,ENSSSCG00000013532,ENSSSCG00000006023,ENSSSCG00000026293,ENSSSCG00000010250,ENSSSCG00000008745,ENSSSCG00000001930,ENSSSCG00000016109,ENSSSCG00000022372,ENSSSCG00000009555,ENSSSCG00000024791,ENSSSCG00000017880,ENSSSCG00000017879,ENSSSCG00000012365,…	SLC34A2,GAK,VTI1B,LAMP3,DYNC1I1,RAB4A,RAB3C,ANXA2,CAPS,SYBU,STX5,VPS26A,PROM1,PKM,ALS2,SLC6A14,LAMP1,CD59,SPNS3,SPNS2,MSN,CALM1,MIF,ARHGEF2,MYO5A,TSPAN1,EPS8L2,ANO5,PLD1,GDI2,SNAP25,SRI,--,CIB1,RAB29,FLOT2,CASK,PLD2,RABGEF1,SLC30A7,SPNS1,EZR,NPC1,RAB11A,STX12,LGR6,KIF5B,STX10,SLC9A3R1,KCNE3,TSPAN4,RAB3B,STOM,STX7,--,VAMP8,ANXA7,RAB39B,--,RHOA,GNB2,PIK3C2A,TAGLN2,--
GO:0030176	0.0335373	1	42	46	integral component of endoplasmic reticulum membrane	CC	ENSSSCG00000025281,ENSSSCG00000002822,ENSSSCG00000026781,ENSSSCG00000005670,ENSSSCG00000024793,ENSSSCG00000017279,ENSSSCG00000008800,ENSSSCG00000013780,ENSSSCG00000012087,ENSSSCG00000000379,ENSSSCG00000008268,ENSSSCG00000030567,ENSSSCG00000021181,ENSSSCG00000014792,ENSSSCG00000013905,ENSSSCG00000010319,ENSSSCG00000009784,ENSSSCG00000021004,ENSSSCG00000012927,ENSSSCG00000020823,ENSSSCG00000017094,…	ARL6IP1,--,--,DOLPP1,PORCN,ERN1,TMEM33,TECR,SLC37A1,ESYT1,AUP1,SSR3,DHCR7,STIM1,FKBP8,SAMD8,ABCB9,DERL1,RCE1,BSCL2,MARCH6,VIMP,SLC37A2,EMC6,UPK2,RRBP1,--,FAM134B,G6PC3,DCSTAMP,ALG14,FITM2,DPM3,DERL3,G6PC2,--,--,TM7SF2,TAP2,FITM1,DPM2,DOLK
GO:0019897	0.0342625	1	15	15	extrinsic component of plasma membrane	CC	ENSSSCG00000000029,ENSSSCG00000005302,ENSSSCG00000004578,ENSSSCG00000022874,ENSSSCG00000004038,ENSSSCG00000028968,ENSSSCG00000004639,ENSSSCG00000027096,ENSSSCG00000014909,ENSSSCG00000001834,ENSSSCG00000004057,ENSSSCG00000000912,ENSSSCG00000015246,ENSSSCG00000026932,ENSSSCG00000006612	SCUBE1,STOML2,ANXA2,DNAJA3,PLG,RAC1,USP8,--,SYTL2,MFGE8,SYTL3,EEA1,ST14,RS1,S100A10
GO:0000276	0.0343479	1	9	9	mitochondrial proton-transporting ATP synthase complex, coupling factor F(o)	CC	ENSSSCG00000030602,ENSSSCG00000009024,ENSSSCG00000016881,ENSSSCG00000023903,ENSSSCG00000023777,ENSSSCG00000006789,ENSSSCG00000022586,ENSSSCG00000025104,ENSSSCG00000018080	--,--,ATP5H,ATP5I,ATP5L,ATP5F1,--,--,ATP8
GO:0005758	0.0343745	1	31	35	mitochondrial intermembrane space	CC	ENSSSCG00000024355,ENSSSCG00000008094,ENSSSCG00000000359,ENSSSCG00000005302,ENSSSCG00000015481,ENSSSCG00000024275,ENSSSCG00000016127,ENSSSCG00000004347,ENSSSCG00000002819,ENSSSCG00000013778,ENSSSCG00000001517,ENSSSCG00000029519,ENSSSCG00000030526,ENSSSCG00000013013,ENSSSCG00000007550,ENSSSCG00000010289,ENSSSCG00000016714,ENSSSCG00000012494,ENSSSCG00000024667,ENSSSCG00000014830,ENSSSCG00000011604,…	AK2,--,BLOC1S1,STOML2,MYOC,--,NDUFS1,FBXL4,ARL2BP,NDUFB7,--,CIAPIN1,--,ARL2,COX19,MICU1,CYCS,TIMM8A,MICU2,COA4,CHCHD4,GATM,--,UQCC2,TRIAP1,NDUFA8,--,PINK1,PRELID3B,PRELID1,PARK7
GO:0017080	0.0354196	1	19	20	sodium channel regulator activity	MF	ENSSSCG00000015084,ENSSSCG00000015083,ENSSSCG00000029199,ENSSSCG00000021651,ENSSSCG00000010202,ENSSSCG00000007265,ENSSSCG00000021977,ENSSSCG00000030207,ENSSSCG00000024299,ENSSSCG00000023267,ENSSSCG00000021374,ENSSSCG00000004919,ENSSSCG00000006206,ENSSSCG00000024666,ENSSSCG00000010035,ENSSSCG00000021443,ENSSSCG00000024325,ENSSSCG00000022331,ENSSSCG00000030431	--,FXYD6,SCN4B,SCN2B,FXYD4,SNTA1,GPD1L,--,--,SCN1B,FXYD1,NEDD4L,--,FXYD3,YWHAH,SGK1,SGK2,--,RANGRF
GO:0045860	0.0368142	1	35	38	positive regulation of protein kinase activity	BP	ENSSSCG00000013415,ENSSSCG00000024070,ENSSSCG00000016432,ENSSSCG00000030072,ENSSSCG00000008881,ENSSSCG00000008962,ENSSSCG00000004110,ENSSSCG00000007864,ENSSSCG00000016109,ENSSSCG00000003698,ENSSSCG00000001509,ENSSSCG00000024817,ENSSSCG00000010965,ENSSSCG00000010966,ENSSSCG00000003833,ENSSSCG00000009664,ENSSSCG00000006940,ENSSSCG00000025008,ENSSSCG00000023296,ENSSSCG00000006338,ENSSSCG00000029852,…	AZU1,CDK5,--,IQGAP1,RAPGEF2,EREG,TAB2,GPRC5B,ALS2,ADCYAP1,DAXX,RASSF2,CCL21,CCL19,DAB1,PTK2B,CYR61,--,CENPE,DDR2,WNT5A,LAT,VLDLR,MMD,GAS6,SNX9,MMD2,CDK5R2,RELN,WNT3A,JTB,TNF,CDC25B,EPO,CDK5R1
GO:0030500	0.0369792	1	14	14	regulation of bone mineralization	BP	ENSSSCG00000015370,ENSSSCG00000006492,ENSSSCG00000030211,ENSSSCG00000029849,ENSSSCG00000027722,ENSSSCG00000004241,ENSSSCG00000028637,ENSSSCG00000009664,ENSSSCG00000029764,ENSSSCG00000006338,ENSSSCG00000016784,ENSSSCG00000029028,ENSSSCG00000022554,ENSSSCG00000000606	TWIST1,BGLAP,NBR1,S1PR1,--,GJA1,CYP27B1,PTK2B,TXLNG,DDR2,ANKH,FGF23,MATN1,MGP
GO:0002377	0.0372838	1	22	29	immunoglobulin production	BP	ENSSSCG00000002053,ENSSSCG00000026675,ENSSSCG00000002055,ENSSSCG00000002057,ENSSSCG00000022761,ENSSSCG00000022057,ENSSSCG00000010448,ENSSSCG00000023346,ENSSSCG00000025872,ENSSSCG00000002097,ENSSSCG00000002100,ENSSSCG00000003543,ENSSSCG00000016832,ENSSSCG00000022467,ENSSSCG00000008661,ENSSSCG00000020750,ENSSSCG00000023617,ENSSSCG00000029057,ENSSSCG00000008205,ENSSSCG00000029427,ENSSSCG00000025508,…	TRDV2,--,--,--,--,--,FAS,--,--,TRAV14DV4,TRAV9-1,NIPAL3,IL7R,VPREB1,--,--,--,--,--,--,--,VPREB3
GO:0001664	0.0375975	1	33	38	G-protein coupled receptor binding	MF	ENSSSCG00000026200,ENSSSCG00000022163,ENSSSCG00000021700,ENSSSCG00000024963,ENSSSCG00000024341,ENSSSCG00000007197,ENSSSCG00000008714,ENSSSCG00000005284,ENSSSCG00000000277,ENSSSCG00000029849,ENSSSCG00000029279,ENSSSCG00000030843,ENSSSCG00000010281,ENSSSCG00000008037,ENSSSCG00000006461,ENSSSCG00000006805,ENSSSCG00000015406,ENSSSCG00000017204,ENSSSCG00000027822,ENSSSCG00000016718,ENSSSCG00000006034,…	PROK2,--,--,--,USP20,RSPO4,PSAPL1,GNA14,NPFF,S1PR1,GNA11,APLN,PSAP,NPW,ARHGEF11,--,GNAT3,ITGB4,CORT,NPY,RSPO2,FYN,--,PYY,ARHGEF12,ARRB2,S1PR2,--,STUB1,GNAT1,GNA15,GNAI2,CCL2
GO:0014002	0.0382007	1	13	13	astrocyte development	BP	ENSSSCG00000005710,ENSSSCG00000012536,ENSSSCG00000011783,ENSSSCG00000027726,ENSSSCG00000004346,ENSSSCG00000011033,ENSSSCG00000017343,ENSSSCG00000001437,ENSSSCG00000006748,ENSSSCG00000024305,ENSSSCG00000006588,ENSSSCG00000006590,ENSSSCG00000011377	LAMC3,PLP1,EIF2B5,DLL1,POU3F2,VIM,GFAP,AGER,TSPAN2,MT3,S100A9,S100A8,LAMB2
GO:0007218	0.0383344	1	60	71	neuropeptide signaling pathway	BP	ENSSSCG00000008993,ENSSSCG00000007180,ENSSSCG00000021033,ENSSSCG00000027985,ENSSSCG00000005705,ENSSSCG00000008944,ENSSSCG00000012535,ENSSSCG00000021344,ENSSSCG00000008881,ENSSSCG00000027886,ENSSSCG00000029826,ENSSSCG00000016664,ENSSSCG00000000277,ENSSSCG00000008889,ENSSSCG00000017189,ENSSSCG00000025679,ENSSSCG00000004356,ENSSSCG00000027911,ENSSSCG00000020941,ENSSSCG00000023559,ENSSSCG00000003698,…	NPY2R,PDYN,--,--,QRFP,NPFFR2,GLRA4,--,RAPGEF2,--,--,NPSR1,NPFF,NPY5R,GALR2,--,MCHR2,LTB4R,LTB4R2,GALR1,ADCYAP1,--,GALR3,GPR83,AGRP,--,SORT1,NPW,NMUR2,GLRA1,OPRK1,PROKR2,NPS,NPBWR1,RXFP4,PROKR1,TACR2,NPFFR1,PTGDR2,NPY,NPPA,HCRTR1,MCHR1,SSTR3,GLRA3,--,OPRD1,CALCA,--,SSTR1,GAL,PYY,--,HCRT,SSTR2,NTSR2,OPRM1,PTH2,MC2R,ECEL1
GO:0005179	0.0385192	1	57	74	hormone activity	MF	ENSSSCG00000028935,ENSSSCG00000006215,ENSSSCG00000021171,ENSSSCG00000011808,ENSSSCG00000004078,ENSSSCG00000023909,ENSSSCG00000003318,ENSSSCG00000013328,ENSSSCG00000013329,ENSSSCG00000017284,ENSSSCG00000001050,ENSSSCG00000023749,ENSSSCG00000011277,ENSSSCG00000003698,ENSSSCG00000013575,ENSSSCG00000030843,ENSSSCG00000016983,ENSSSCG00000011568,ENSSSCG00000021865,ENSSSCG00000003333,ENSSSCG00000013887,…	INSL5,CRH,--,SST,--,THPO,GALP,FSHB,--,GH1,EDN1,ADM2,CCK,ADCYAP1,RETN,APLN,STC2,GHRL,INHBA,FAM132A,INSL3,RLN3,--,GAST,INSL6,CORT,GPHA2,NPY,MB21D1,NPPA,STC1,NPPB,--,ADM,--,INHBE,GPHB5,--,CALCA,ADM5,GAL,--,METRNL,PYY,HAMP,MLN,--,--,--,CGA,EDN3,NPPC,GNRH1,POMC,EPO,--,OXT
GO:0007166	0.0385349	1	159	190	cell surface receptor signaling pathway	BP	ENSSSCG00000016403,ENSSSCG00000029136,ENSSSCG00000002901,ENSSSCG00000011415,ENSSSCG00000011808,ENSSSCG00000023462,ENSSSCG00000015320,ENSSSCG00000025432,ENSSSCG00000014939,ENSSSCG00000022355,ENSSSCG00000016459,ENSSSCG00000014434,ENSSSCG00000027824,ENSSSCG00000026315,ENSSSCG00000029072,ENSSSCG00000021121,ENSSSCG00000024450,ENSSSCG00000008889,ENSSSCG00000002608,ENSSSCG00000017283,ENSSSCG00000022486,…	VIPR2,--,UPK1A,MAPKAPK3,SST,GPR50,CALCR,--,--,CD37,EPHA1,IL17B,--,OR9A2,--,--,--,NPY5R,--,CD79B,CBLB,SMO,--,EDN1,--,--,--,--,--,CD3E,CD53,--,CD3D,--,--,--,--,AGTR2,--,--,GHRHR,NUP62,--,CD3G,--,ADGRA2,EMR2,--,--,VIPR1,--,CLCF1,GPR83,--,--,ADGRG2,--,CD59,--,--,--,ADGRG6,--,CU468857.3,CU468857.6,FZD10,--,MIF,--,ADGRF5,ADGRL2,--,PROKR2,CU468857.8,CU468857.1,GIPR,ADGRL4,JMJD6,IL17D,TSPAN1,IL12B,TNFRSF…
GO:0000790	0.0387635	1	114	134	nuclear chromatin	CC	ENSSSCG00000020991,ENSSSCG00000030071,ENSSSCG00000023360,ENSSSCG00000020971,ENSSSCG00000025592,ENSSSCG00000030023,ENSSSCG00000022537,ENSSSCG00000004952,ENSSSCG00000016738,ENSSSCG00000016435,ENSSSCG00000000292,ENSSSCG00000011001,ENSSSCG00000000272,ENSSSCG00000002787,ENSSSCG00000014307,ENSSSCG00000004563,ENSSSCG00000003810,ENSSSCG00000025551,ENSSSCG00000025374,ENSSSCG00000023765,ENSSSCG00000017286,…	--,--,--,--,TP63,HIST1H1B,--,SMAD3,H2AFZ,SMARCD3,ZNF385A,APTX,SP1,E2F4,H2AFY,--,UBE2U,--,DVL3,PCGF2,SMARCD2,H1FNT,ASXL1,POU4F1,CALCOCO1,H2AFX,CBX8,ETV3,JUN,HIST2H2AA3,UHRF1,CHD4,CBX7,ASF1B,MTA2,CDCA5,E2F1,WBP2,--,HIST2H2AB,CITED2,MIXL1,FOXH1,--,PHOX2A,--,
GO:0008378	0.0388279	1	21	22	galactosyltransferase activity	MF	ENSSSCG00000028199,ENSSSCG00000010998,ENSSSCG00000012070,ENSSSCG00000024393,ENSSSCG00000010800,ENSSSCG00000026962,ENSSSCG00000015341,ENSSSCG00000022001,ENSSSCG00000022151,ENSSSCG00000013886,ENSSSCG00000014874,ENSSSCG00000021774,ENSSSCG00000015918,ENSSSCG00000009798,ENSSSCG00000020897,ENSSSCG00000023347,ENSSSCG00000023233,ENSSSCG00000008374,ENSSSCG00000001503,ENSSSCG00000026723,ENSSSCG00000014035	--,B4GALT1,B3GALT5,B3GNT5,B3GALT2,A4GALT,--,--,B3GALT6,B3GNT3,B3GNT6,B3GALNT1,B3GALT1,B3GNT4,--,--,--,--,B3GALT4,--,B4GALT7
GO:0035567	0.0396927	1	17	17	non-canonical Wnt signaling pathway	BP	ENSSSCG00000009004,ENSSSCG00000025374,ENSSSCG00000028968,ENSSSCG00000009751,ENSSSCG00000016018,ENSSSCG00000025689,ENSSSCG00000016111,ENSSSCG00000025822,ENSSSCG00000011606,ENSSSCG00000029852,ENSSSCG00000016140,ENSSSCG00000010529,ENSSSCG00000023004,ENSSSCG00000014920,ENSSSCG00000006052,ENSSSCG00000009679,ENSSSCG00000006383	SFRP2,DVL3,RAC1,FZD10,FRZB,--,FZD7,SFRP1,WNT7A,WNT5A,FZD5,SFRP5,FZD9,FZD4,FZD6,FZD3,VANGL2
GO:0003707	0.0405815	1	48	53	steroid hormone receptor activity	MF	ENSSSCG00000024987,ENSSSCG00000025777,ENSSSCG00000014401,ENSSSCG00000024896,ENSSSCG00000024975,ENSSSCG00000004978,ENSSSCG00000028326,ENSSSCG00000004576,ENSSSCG00000010814,ENSSSCG00000002619,ENSSSCG00000000006,ENSSSCG00000003551,ENSSSCG00000026909,ENSSSCG00000001474,ENSSSCG00000002388,ENSSSCG00000005385,ENSSSCG00000027017,ENSSSCG00000004384,ENSSSCG00000011594,ENSSSCG00000011890,ENSSSCG00000003211,…	NR3C2,ESR1,NR3C1,--,--,NR2E3,--,RORA,ESRRG,--,PPARA,PAQR7,--,RXRB,ESRRB,NR4A3,NR1D2,NR2E1,NR2C2,NR1I2,NR1H2,NR4A2,OR51E2,THRB,RXRG,PAQR8,RARB,RARA,NR1H4,PPARD,THRA,--,ESR2,NR1I3,--,VDR,ABHD2,NR2C1,NR2F1,PGR,HNF4A,NR2F2,RARG,NR2F6,NR6A1,RORC,NR1H3,ESRRA
GO:0045746	0.0409266	1	15	15	negative regulation of Notch signaling pathway	BP	ENSSSCG00000005828,ENSSSCG00000011618,ENSSSCG00000005844,ENSSSCG00000004223,ENSSSCG00000004754,ENSSSCG00000004755,ENSSSCG00000014853,ENSSSCG00000006159,ENSSSCG00000010603,ENSSSCG00000001498,ENSSSCG00000001952,ENSSSCG00000007501,ENSSSCG00000015953,ENSSSCG00000015954,ENSSSCG00000009878	EGFL7,GATA2,NRARP,HEY2,CHAC1,DLL4,GDPD5,HEY1,NEURL1,BEND6,NFKBIA,BMP7,DLX1,DLX2,RITA1
GO:0043966	0.041121	1	25	26	histone H3 acetylation	BP	ENSSSCG00000011551,ENSSSCG00000010187,ENSSSCG00000025472,ENSSSCG00000009071,ENSSSCG00000011548,ENSSSCG00000011776,ENSSSCG00000024912,ENSSSCG00000028310,ENSSSCG00000024621,ENSSSCG00000012267,ENSSSCG00000020665,ENSSSCG00000017414,ENSSSCG00000010316,ENSSSCG00000009148,ENSSSCG00000005478,ENSSSCG00000001946,ENSSSCG00000000701,ENSSSCG00000017553,ENSSSCG00000008548,ENSSSCG00000007023,ENSSSCG00000007092,…	TADA3,TAF5L,MAP3K7,JADE1,BRPF1,YEATS2,WDR5,DR1,KAT2B,JADE3,TAF6L,KAT2A,KAT6B,LEF1,POLE3,MBIP,ING4,KAT7,SUPT7L,KAT6A,KAT14,MYOD1,TADA1,PER1,SAP130
GO:0003779	0.0412196	1	171	201	actin binding	MF	ENSSSCG00000027964,ENSSSCG00000025114,ENSSSCG00000021102,ENSSSCG00000000024,ENSSSCG00000009448,ENSSSCG00000016592,ENSSSCG00000000025,ENSSSCG00000016604,ENSSSCG00000026294,ENSSSCG00000016398,ENSSSCG00000023292,ENSSSCG00000027580,ENSSSCG00000014430,ENSSSCG00000029599,ENSSSCG00000030700,ENSSSCG00000007167,ENSSSCG00000016535,ENSSSCG00000015353,ENSSSCG00000030543,ENSSSCG00000008858,ENSSSCG00000030260,…	--,FMNL3,MAEA,PARVB,--,FSCN3,PARVG,WASL,--,--,INF2,--,ABLIM3,--,--,VPS16,CALD1,SCIN,COTL1,KLHL2,PFN2,--,ANKRD1,ABLIM1,CORO1A,CAPZA2,CAPG,--,--,ABLIM2,XIRP1,--,KIF18A,--,--,--,WIPF1,--,PHACTR1,TPM2,ANLN,DAG1,TLN1,--,RP2,TPM4,RUSC1,VCL,FMNL1,HOOK1,HOMER2,MI
GO:0019058	0.0413746	1	14	14	viral life cycle	BP	ENSSSCG00000029525,ENSSSCG00000008886,ENSSSCG00000029683,ENSSSCG00000023088,ENSSSCG00000029149,ENSSSCG00000030198,ENSSSCG00000023038,ENSSSCG00000025631,ENSSSCG00000025394,ENSSSCG00000021572,ENSSSCG00000021965,ENSSSCG00000001817,ENSSSCG00000028955,ENSSSCG00000020695	--,--,--,--,--,--,--,--,--,--,--,FURIN,--,--
GO:0005667	0.0415866	1	128	147	transcription factor complex	CC	ENSSSCG00000027648,ENSSSCG00000029201,ENSSSCG00000025920,ENSSSCG00000022155,ENSSSCG00000025592,ENSSSCG00000004948,ENSSSCG00000004952,ENSSSCG00000002630,ENSSSCG00000009061,ENSSSCG00000004956,ENSSSCG00000005720,ENSSSCG00000010461,ENSSSCG00000005737,ENSSSCG00000002787,ENSSSCG00000014949,ENSSSCG00000004978,ENSSSCG00000025568,ENSSSCG00000000059,ENSSSCG00000028118,ENSSSCG00000011996,ENSSSCG00000000950,…	TRPS1,AJUBA,--,RBPJ,TP63,SMAD6,SMAD3,GCM1,NAA15,SKOR1,MED27,ANKRD1,GFI1B,E2F4,MED17,NR2E3,TEAD2,XRCC6,RBM14,POU1F1,E2F7,--,--,DMBX1,CDK2,MED7,EP300,FOXF2,TBX2,SMAD5,POU3F2,FOS,GATA2,TFAP2D,TCF7L1,LMO4,--,LDB2,SMAD9,ATF5,HCLS1,ZGLP1,SMAD1,CEBPA,LMO2,GSC,BSX,NKX2-1,JUN,RB1,NKX2-5,MTA2,E2F1,LEF1,NR4A3,CDK4,--,FOXH1,HIF3A,PARP1,HOXA11,TBL1X,SIN3A,PITX2,LDB1,FOXE3,GATA4,SIX1,ETS1,ASCL3,PBX1,DEAF1,--,T…
GO:0005496	0.0418461	1	15	15	steroid binding	MF	ENSSSCG00000025777,ENSSSCG00000014401,ENSSSCG00000002475,ENSSSCG00000002619,ENSSSCG00000003551,ENSSSCG00000026909,ENSSSCG00000012625,ENSSSCG00000002388,ENSSSCG00000001750,ENSSSCG00000012371,ENSSSCG00000026422,ENSSSCG00000005109,ENSSSCG00000001428,ENSSSCG00000014977,ENSSSCG00000013028	ESR1,NR3C1,SERPINA6,--,PAQR7,--,PGRMC1,ESRRB,PAQR8,AR,GPER1,ESR2,CYP21A2,PGR,ESRRA
GO:0022857	0.0419763	1	53	59	transmembrane transporter activity	MF	ENSSSCG00000013057,ENSSSCG00000008695,ENSSSCG00000016517,ENSSSCG00000009075,ENSSSCG00000027787,ENSSSCG00000022051,ENSSSCG00000028110,ENSSSCG00000026635,ENSSSCG00000024166,ENSSSCG00000027330,ENSSSCG00000028537,ENSSSCG00000003390,ENSSSCG00000023915,ENSSSCG00000029248,ENSSSCG00000004039,ENSSSCG00000025413,ENSSSCG00000022084,ENSSSCG00000004040,ENSSSCG00000020671,ENSSSCG00000024523,ENSSSCG00000029477,…	--,MFSD10,SVOPL,MFSD8,--,--,--,--,SLC2A6,--,--,--,SLC2A4,--,SLC22A3,--,--,SLC22A2,--,SLC2A13,--,--,SLC22A8,SPNS3,SPNS2,GJA1,SLC22A6,SV2A,MFSD9,SLC22A23,SLC22A15,--,SLC2A10,SLC22A16,--,SLC17A1,SVOP,--,SPNS1,--,SLC22A4,SLC16A7,SLC22A5,SLC2A12,SLC22A14,--,--
GO:0030659	0.0422147	1	15	15	cytoplasmic vesicle membrane	CC	ENSSSCG00000021346,ENSSSCG00000008695,ENSSSCG00000008697,ENSSSCG00000022723,ENSSSCG00000016897,ENSSSCG00000007757,ENSSSCG00000017678,ENSSSCG00000001875,ENSSSCG00000025067,ENSSSCG00000016680,ENSSSCG00000002635,ENSSSCG00000003401,ENSSSCG00000026422,ENSSSCG00000007062,ENSSSCG00000030535	--,MFSD10,HTT,--,--,TRIM72,APPBP2,--,ECE2,--,SPIRE2,KIF1B,GPER1,LAMP5,SNX9
GO:0005184	0.0427089	1	12	14	neuropeptide hormone activity	MF	ENSSSCG00000005705,ENSSSCG00000000277,ENSSSCG00000011277,ENSSSCG00000003698,ENSSSCG00000002775,ENSSSCG00000022576,ENSSSCG00000011596,ENSSSCG00000027822,ENSSSCG00000016718,ENSSSCG00000003430,ENSSSCG00000012883,ENSSSCG00000025414	QRFP,NPFF,CCK,ADCYAP1,AGRP,--,TRH,CORT,NPY,NPPA,GAL,PYY
GO:0043005	0.043204	1	145	169	neuron projection	CC	ENSSSCG00000016151,ENSSSCG00000021033,ENSSSCG00000021269,ENSSSCG00000002827,ENSSSCG00000030103,ENSSSCG00000015053,ENSSSCG00000022538,ENSSSCG00000021534,ENSSSCG00000024497,ENSSSCG00000012754,ENSSSCG00000012755,ENSSSCG00000016794,ENSSSCG00000017837,ENSSSCG00000012535,ENSSSCG00000011423,ENSSSCG00000017142,ENSSSCG00000030682,ENSSSCG00000029615,ENSSSCG00000000478,ENSSSCG00000015386,ENSSSCG00000021344,…	MAP2,--,SHANK3,SLC6A2,--,HTR3B,--,SLC30A3,HTR3A,GABRE,GABRQ,MYO10,--,GLRA4,GRM2,BAIAP2,TMEM57,VAMP7,GRIP1,FAM126A,--,ADAM21,GABRG2,SLC6A12,IQGAP1,--,UBB,SLC6A13,CALB1,GABRR1,SYT1,GABRR2,CHRNA9,NPY5R,HTR3C,AHCYL2,CPEB3,HTR3D,SNAP23,--,GABRB2,CPEB2,SPINK2,PTEN,CHRNA1,RIC3,SLC6A4,ZACN,POU4F1,SYP,GABRA2,HDAC6,VIM,GABRA4,CHRNB3,GABRB1,LIMK1,CPEB4,NGFR,CHRNB2,STMN1,LRRK2,GLRA1,RAP1A,CPNE5,KIF5C,MAPK8IP…
GO:0032266	0.0435046	1	24	25	phosphatidylinositol-3-phosphate binding	MF	ENSSSCG00000023801,ENSSSCG00000017260,ENSSSCG00000008689,ENSSSCG00000002298,ENSSSCG00000000137,ENSSSCG00000024761,ENSSSCG00000016005,ENSSSCG00000025977,ENSSSCG00000004761,ENSSSCG00000007425,ENSSSCG00000007601,ENSSSCG00000004385,ENSSSCG00000006619,ENSSSCG00000027378,ENSSSCG00000009376,ENSSSCG00000002852,ENSSSCG00000029359,ENSSSCG00000017133,ENSSSCG00000005524,ENSSSCG00000007580,ENSSSCG00000005585,…	LANCL2,WIPI1,ZFYVE28,ZFYVE26,NCF4,SNX13,--,SNX24,ZFYVE19,SNX21,TECPR1,SNX3,SNX27,SH3PXD2B,VPS36,PLEKHF1,PHLDA3,WDR45B,DAB2IP,WIPI2,--,RS1,--,SNX19
GO:0005031	0.0441167	1	21	23	tumor necrosis factor-activated receptor activity	MF	ENSSSCG00000003386,ENSSSCG00000009633,ENSSSCG00000012861,ENSSSCG00000017548,ENSSSCG00000025094,ENSSSCG00000031047,ENSSSCG00000009637,ENSSSCG00000009636,ENSSSCG00000014825,ENSSSCG00000030644,ENSSSCG00000022208,ENSSSCG00000007440,ENSSSCG00000000705,ENSSSCG00000004898,ENSSSCG00000000706,ENSSSCG00000003331,ENSSSCG00000000708,ENSSSCG00000011333,ENSSSCG00000003437,ENSSSCG00000020707,ENSSSCG00000029135	TNFRSF9,--,--,NGFR,--,CH242-363D24.1,--,--,RELT,--,TNFRSF1B,CD40,CD27,TNFRSF11A,LTBR,TNFRSF4,TNFRSF1A,--,TNFRSF8,TNFRSF11B,TNFRSF25
GO:0004190	0.0448147	1	33	37	aspartic-type endopeptidase activity	MF	ENSSSCG00000025327,ENSSSCG00000012074,ENSSSCG00000015079,ENSSSCG00000007228,ENSSSCG00000029938,ENSSSCG00000013095,ENSSSCG00000015401,ENSSSCG00000002340,ENSSSCG00000006804,ENSSSCG00000003462,ENSSSCG00000003212,ENSSSCG00000017314,ENSSSCG00000014570,ENSSSCG00000015278,ENSSSCG00000004635,ENSSSCG00000014995,ENSSSCG00000028673,ENSSSCG00000013464,ENSSSCG00000010860,ENSSSCG00000012471,ENSSSCG00000009917,…	--,BACE2,BACE1,HM13,--,--,PCLO,PSEN1,--,DDI2,NAPSA,SPPL2C,NRIP3,--,SPPL2A,DDI1,--,SPPL2B,PSEN2,--,SPPL3,--,PGA5,PGC,--,--,--,--,NRIP2,--,--,PPAG3,--
GO:0001056	0.0450296	1	18	19	RNA polymerase III activity	MF	ENSSSCG00000007970,ENSSSCG00000022507,ENSSSCG00000009310,ENSSSCG00000000063,ENSSSCG00000000116,ENSSSCG00000010327,ENSSSCG00000000169,ENSSSCG00000021472,ENSSSCG00000009622,ENSSSCG00000007840,ENSSSCG00000006682,ENSSSCG00000026233,ENSSSCG00000021180,ENSSSCG00000000461,ENSSSCG00000012839,ENSSSCG00000007095,ENSSSCG00000006691,ENSSSCG00000028007	POLR3K,POLR2H,POLR1D,POLR3H,POLR2F,POLR3A,--,POLR2E,POLR3D,POLR3E,--,POLR3G,POLR2K,POLR2L,--,POLR3F,POLR3C,POLR1C
GO:0005666	0.0450296	1	18	19	DNA-directed RNA polymerase III complex	CC	ENSSSCG00000007970,ENSSSCG00000022507,ENSSSCG00000009310,ENSSSCG00000000063,ENSSSCG00000000116,ENSSSCG00000010327,ENSSSCG00000000169,ENSSSCG00000021472,ENSSSCG00000009622,ENSSSCG00000007840,ENSSSCG00000006682,ENSSSCG00000026233,ENSSSCG00000021180,ENSSSCG00000000461,ENSSSCG00000012839,ENSSSCG00000007095,ENSSSCG00000006691,ENSSSCG00000028007	POLR3K,POLR2H,POLR1D,POLR3H,POLR2F,POLR3A,--,POLR2E,POLR3D,POLR3E,--,POLR3G,POLR2K,POLR2L,--,POLR3F,POLR3C,POLR1C
GO:0006325	0.0451508	1	25	31	chromatin organization	BP	ENSSSCG00000020991,ENSSSCG00000030071,ENSSSCG00000023360,ENSSSCG00000020971,ENSSSCG00000030023,ENSSSCG00000022537,ENSSSCG00000016738,ENSSSCG00000004719,ENSSSCG00000022645,ENSSSCG00000021399,ENSSSCG00000000697,ENSSSCG00000021363,ENSSSCG00000029342,ENSSSCG00000024775,ENSSSCG00000027976,ENSSSCG00000010235,ENSSSCG00000001102,ENSSSCG00000027096,ENSSSCG00000026938,ENSSSCG00000012220,ENSSSCG00000025331,…	--,--,--,--,HIST1H1B,--,H2AFZ,CDAN1,H2AFX,HIST2H2AA3,CHD4,CHD3,--,HIST2H2AB,--,SIRT1,HIST1H2AA,--,HIST2H2AA4,--,--,MOS,HYPM,--,SATB1
GO:0005525	0.0457188	1	282	343	GTP binding	MF	ENSSSCG00000023697,ENSSSCG00000025163,ENSSSCG00000024943,ENSSSCG00000010981,ENSSSCG00000016593,ENSSSCG00000004924,ENSSSCG00000002823,ENSSSCG00000022163,ENSSSCG00000026022,ENSSSCG00000011619,ENSSSCG00000003797,ENSSSCG00000010099,ENSSSCG00000026473,ENSSSCG00000008835,ENSSSCG00000024963,ENSSSCG00000021660,ENSSSCG00000029828,ENSSSCG00000025041,ENSSSCG00000022342,ENSSSCG00000027737,ENSSSCG00000027429,…	REM2,--,EHD3,NUDT2,ARF5,RASL12,GNAO1,--,--,--,DIRAS3,--,--,RASL11B,--,--,RAB5B,--,--,--,--,--,--,--,GIMAP6,ARL16,SEPT3,GIMAP1,GIMAP8,--,--,--,SNW1,GNL1,RAB9B,SAR1B,AGAP3,RAB2B,EEF1A2,MX1,--,HRAS,--,ARL8B,GNL2,--,MX2,GNA14,--,SEPT7,ARL6,--,--,ARL5B,--,RAB8B,--,GSPT1,LSG1,RHOH,REM1,RAB4A,SEPT4,DNM1L,RAP2B,RAB3C,--,--,--,--,--,--,RAB25,RHOU,--,ARL9,GNAZ,RHOF,--,GUF1,RAB6B,RP2,TUBB4A,--,RAB7A,RAB36,-…
GO:0071356	0.0463508	1	41	47	cellular response to tumor necrosis factor	BP	ENSSSCG00000014093,ENSSSCG00000015987,ENSSSCG00000010461,ENSSSCG00000010548,ENSSSCG00000000633,ENSSSCG00000016816,ENSSSCG00000004576,ENSSSCG00000000214,ENSSSCG00000017698,ENSSSCG00000023395,ENSSSCG00000007030,ENSSSCG00000002821,ENSSSCG00000017700,ENSSSCG00000017702,ENSSSCG00000010965,ENSSSCG00000024759,ENSSSCG00000010966,ENSSSCG00000006522,ENSSSCG00000001009,ENSSSCG00000017705,ENSSSCG00000023852,…	CRHBP,NFE2L2,ANKRD1,CHUK,YBX3,ADAMTS12,RORA,GPD1,CCL4,TDGF1,IKBKB,CCL22,CCL3L1,CCL23,CCL21,CX3CL1,CCL19,GBA,RIPK1,CCL5,CCL17,SIRT1,NKX3-1,GPER1,CIB1,ZFAND6,SFRP1,CCL25,DCSTAMP,DAB2IP,GATA3,ADAMTS7,BRCA1,CCL8,CCL1,HYAL3,CCL2,HYAL1,--,HYAL2,--
GO:0048704	0.0466394	1	38	42	embryonic skeletal system morphogenesis	BP	ENSSSCG00000015370,ENSSSCG00000015982,ENSSSCG00000015984,ENSSSCG00000015985,ENSSSCG00000028844,ENSSSCG00000023765,ENSSSCG00000008649,ENSSSCG00000000837,ENSSSCG00000002490,ENSSSCG00000003021,ENSSSCG00000001620,ENSSSCG00000006857,ENSSSCG00000005045,ENSSSCG00000008618,ENSSSCG00000016701,ENSSSCG00000016702,ENSSSCG00000016703,ENSSSCG00000016705,ENSSSCG00000016706,ENSSSCG00000005087,ENSSSCG00000005089,…	TWIST1,HOXD9,HOXD4,HOXD3,--,PCGF2,SOX11,CHST11,GSC,MEGF8,MDFI,COL11A1,BMP4,MYCN,HOXA7,HOXA6,HOXA5,HOXA3,HOXA2,SIX1,SIX4,MEF2C,HOXD10,FLVCR1,--,BMI1,OSR2,TBX15,SIX2,HOXB1,HOXB2,HOXB3,HOXB4,HOXB8,HOXB7,WNT9A,HOXB6,HOXB5
GO:0009607	0.0466555	1	12	13	response to biotic stimulus	BP	ENSSSCG00000002903,ENSSSCG00000021903,ENSSSCG00000014565,ENSSSCG00000014564,ENSSSCG00000024218,ENSSSCG00000025000,ENSSSCG00000003014,ENSSSCG00000027871,ENSSSCG00000028736,ENSSSCG00000026182,ENSSSCG00000027970,ENSSSCG00000024403	--,--,--,IFITM1,--,SYNDIG1L,TMEM91,--,--,--,--,PRRT1
GO:0007194	0.0468264	1	13	13	negative regulation of adenylate cyclase activity	BP	ENSSSCG00000015048,ENSSSCG00000013424,ENSSSCG00000008703,ENSSSCG00000011716,ENSSSCG00000028305,ENSSSCG00000017189,ENSSSCG00000023559,ENSSSCG00000000121,ENSSSCG00000008122,ENSSSCG00000012851,ENSSSCG00000011911,ENSSSCG00000010629,ENSSSCG00000003714	DRD2,--,ADRA2C,P2RY13,--,GALR2,GALR1,GALR3,ADRA2B,DRD4,--,ADRA2A,HRH4
GO:0005834	0.0470175	1	26	30	heterotrimeric G-protein complex	CC	ENSSSCG00000002823,ENSSSCG00000022163,ENSSSCG00000024963,ENSSSCG00000005285,ENSSSCG00000015323,ENSSSCG00000015324,ENSSSCG00000005284,ENSSSCG00000010840,ENSSSCG00000010046,ENSSSCG00000029279,ENSSSCG00000005462,ENSSSCG00000028092,ENSSSCG00000020786,ENSSSCG00000015406,ENSSSCG00000015407,ENSSSCG00000008011,ENSSSCG00000022068,ENSSSCG00000023433,ENSSSCG00000010152,ENSSSCG00000013724,ENSSSCG00000021621,…	GNAO1,--,--,--,--,GNG11,GNA14,RGS7,GNAZ,GNA11,GNG10,GNG2,GNG7,GNAT3,GNAI1,GNG13,GNG8,GNA12,GNG4,--,RGS6,GNAS,--,GNAT1,GNA15,GNAI2
GO:0016627	0.0476197	1	32	35	oxidoreductase activity, acting on the CH-CH group of donors	MF	ENSSSCG00000016156,ENSSSCG00000008845,ENSSSCG00000023902,ENSSSCG00000020686,ENSSSCG00000002746,ENSSSCG00000008724,ENSSSCG00000024681,ENSSSCG00000013780,ENSSSCG00000004774,ENSSSCG00000013749,ENSSSCG00000017198,ENSSSCG00000020972,ENSSSCG00000017947,ENSSSCG00000008521,ENSSSCG00000006878,ENSSSCG00000030318,ENSSSCG00000009916,ENSSSCG00000013729,ENSSSCG00000017103,ENSSSCG00000009836,ENSSSCG00000030637,…	ACADL,SRD5A3,--,SDHA,--,ACOX3,TECRL,TECR,IVD,--,ACOX1,--,--,SRD5A2,DPYD,SDHC,ACADS,--,SRD5A1,--,IRGQ,--,ACAD9,COX15,--,--,--,TM7SF2,ACOX2,ACADSB,ACAD8,--
GO:0045892	0.0479229	1	286	339	negative regulation of transcription, DNA-templated	BP	ENSSSCG00000026449,ENSSSCG00000021644,ENSSSCG00000006276,ENSSSCG00000025705,ENSSSCG00000022575,ENSSSCG00000016857,ENSSSCG00000023801,ENSSSCG00000009004,ENSSSCG00000021560,ENSSSCG00000022378,ENSSSCG00000029641,ENSSSCG00000010098,ENSSSCG00000015370,ENSSSCG00000024394,ENSSSCG00000024070,ENSSSCG00000015371,ENSSSCG00000021529,ENSSSCG00000010928,ENSSSCG00000016612,ENSSSCG00000000266,ENSSSCG00000022155,…	KDM4A,BRD7,CEBPD,--,PRMT2,DAB2,LANCL2,SFRP2,UBE2I,--,ZSCAN10,THAP7,TWIST1,IKZF4,CDK5,FERD3L,KLF11,KDM5B,FEZF1,PFDN5,RBPJ,RPS6KA5,TP63,PASD1,TCEAL7,CDKN1B,ZGPAT,PML,SALL2,--,SALL1,SKOR1,SNW1,ZNF423,SUMO1,BHLHE40,YEATS2,HES1,MDFIC,TLE4,PTCH1,TBX20,TLE1,HMX1,MYF6,XRCC6,EREG,MSX1,TFAP2A,ZBTB21,PRICKLE1,RING1,ID1,--,--,SOX10,SMO,--,TBX22,--,PAX2,CAPN3,DMBX1,PSMC5,--,HR,FOXF2,TBX2,CD38,--,COMMD7,DDIT3,…
GO:0005789	0.0485287	1	175	208	endoplasmic reticulum membrane	CC	ENSSSCG00000029652,ENSSSCG00000025281,ENSSSCG00000002822,ENSSSCG00000002050,ENSSSCG00000022092,ENSSSCG00000001022,ENSSSCG00000012746,ENSSSCG00000007968,ENSSSCG00000002295,ENSSSCG00000005716,ENSSSCG00000002315,ENSSSCG00000010547,ENSSSCG00000023877,ENSSSCG00000014305,ENSSSCG00000010834,ENSSSCG00000029544,ENSSSCG00000022879,ENSSSCG00000007188,ENSSSCG00000020701,ENSSSCG00000009211,ENSSSCG00000002718,…	TMBIM6,ARL6IP1,--,DAD1,--,SSR1,VMA21,RHBDF1,VTI1B,POMT1,SLC8A3,ERLIN1,--,SAR1B,MIA3,RAB2B,KDELR2,FKBP1A,TTC9,PIGY,FA2H,ORMDL2,FMO3,--,TBC1D20,--,ERN1,--,SOAT1,--,PIGO,JAGN1,PKD2,ANKS4B,HM13,PTDSS1,ALG6,FMO1,RSAD2,MARCH5,--,TMEM33,PIGC,AGPAT2,FKBP9,LMF2,ZNRF4,SCD5,--,UBQLN4,--,DDOST,EPHX1,TYRO3,FKBP2,ALG3,SPINK5,DPAGT1,AGPAT1,HSP90B1,CYB5A,ERLIN2,DGAT1,--,TMX3,TMX1,--,PSEN1,FMO5,FKBP14,NECAB3,PGRM…
GO:0048870	0.0489284	1	12	12	cell motility	BP	ENSSSCG00000015622,ENSSSCG00000001052,ENSSSCG00000028968,ENSSSCG00000011565,ENSSSCG00000011750,ENSSSCG00000015235,ENSSSCG00000017204,ENSSSCG00000017912,ENSSSCG00000012482,ENSSSCG00000013753,ENSSSCG00000003451,ENSSSCG00000002633	CD34,PHACTR1,RAC1,BRK1,PLD1,ETS1,ITGB4,PLD2,SRPX2,IER2,--,--
GO:0048167	0.0490684	1	14	14	regulation of synaptic plasticity	BP	ENSSSCG00000021269,ENSSSCG00000017142,ENSSSCG00000016925,ENSSSCG00000013774,ENSSSCG00000004746,ENSSSCG00000029096,ENSSSCG00000010268,ENSSSCG00000011576,ENSSSCG00000007692,ENSSSCG00000014149,ENSSSCG00000002014,ENSSSCG00000029468,ENSSSCG00000000114,ENSSSCG00000012796	SHANK3,BAIAP2,PLK2,--,ITPKA,HRH2,EIF4EBP2,HRH1,YWHAG,MEF2C,JPH4,P2RX3,PICK1,MECP2
GO:0045666	0.0490996	1	40	44	positive regulation of neuron differentiation	BP	ENSSSCG00000016612,ENSSSCG00000030255,ENSSSCG00000002831,ENSSSCG00000015985,ENSSSCG00000001027,ENSSSCG00000015626,ENSSSCG00000008703,ENSSSCG00000010809,ENSSSCG00000003557,ENSSSCG00000001940,ENSSSCG00000008649,ENSSSCG00000016011,ENSSSCG00000024588,ENSSSCG00000007864,ENSSSCG00000014853,ENSSSCG00000016984,ENSSSCG00000003833,ENSSSCG00000005045,ENSSSCG00000028931,ENSSSCG00000009232,ENSSSCG00000015515,…	FEZF1,EIF4G1,IRX3,HOXD3,BMP6,VWC2,ADRA2C,BRINP3,LIN28A,FOXA1,SOX11,NEUROD1,TLE6,GPRC5B,GDPD5,NKX2-5,DAB1,BMP4,GDF7,NKX6-1,BRINP2,KCTD11,MEF2C,HEYL,BEND6,DUOXA1,--,GLI2,BMP7,MMD,BRINP1,MMD2,CYB5D2,IMPACT,ATOH1,NKX2-2,RHOA,FGFR1,NCOA1,TCF3
GO:0031513	0.0501408	1	16	16	nonmotile primary cilium	CC	ENSSSCG00000008993,ENSSSCG00000015048,ENSSSCG00000008789,ENSSSCG00000009217,ENSSSCG00000008730,ENSSSCG00000010552,ENSSSCG00000001924,ENSSSCG00000013848,ENSSSCG00000022490,ENSSSCG00000017168,ENSSSCG00000023653,ENSSSCG00000016370,ENSSSCG00000004166,ENSSSCG00000008020,ENSSSCG00000029843,ENSSSCG00000025152	NPY2R,DRD2,WDR19,PKD2,DRD5,PKD2L1,BBS4,RAB8A,GPR83,SEPT9,GLIS2,SEPT2,AHI1,IFT140,--,CEP89
GO:0007032	0.0508793	1	22	23	endosome organization	BP	ENSSSCG00000029828,ENSSSCG00000011997,ENSSSCG00000015107,ENSSSCG00000026181,ENSSSCG00000014804,ENSSSCG00000000840,ENSSSCG00000003826,ENSSSCG00000016109,ENSSSCG00000015539,ENSSSCG00000004757,ENSSSCG00000004893,ENSSSCG00000002852,ENSSSCG00000009832,ENSSSCG00000004639,ENSSSCG00000016709,ENSSSCG00000011628,ENSSSCG00000007460,ENSSSCG00000013734,ENSSSCG00000008131,ENSSSCG00000014632,ENSSSCG00000007513,…	RAB5B,CHMP2B,VPS11,AKTIP,LAMTOR1,--,HOOK1,ALS2,STX6,VPS18,VPS4B,PLEKHF1,FAM109A,USP8,SNX10,DNAJC13,ARFGEF2,HOOK2,TMEM127,FAM160A2,RAB22A,--
GO:0001649	0.0509881	1	60	67	osteoblast differentiation	BP	ENSSSCG00000023165,ENSSSCG00000026431,ENSSSCG00000016590,ENSSSCG00000015370,ENSSSCG00000011771,ENSSSCG00000022506,ENSSSCG00000025270,ENSSSCG00000004952,ENSSSCG00000001027,ENSSSCG00000000269,ENSSSCG00000004961,ENSSSCG00000023303,ENSSSCG00000006492,ENSSSCG00000023984,ENSSSCG00000015481,ENSSSCG00000016569,ENSSSCG00000025551,ENSSSCG00000009219,ENSSSCG00000013849,ENSSSCG00000014136,ENSSSCG00000017549,…	SEMA7A,ALPL,SND1,TWIST1,SOX2,--,CHRD,SMAD3,BMP6,SP7,ITGA11,FIGNL1,BGLAP,RSL1D1,MYOC,SMO,--,IBSP,TPM4,VCAN,--,--,MRC2,BMP3,FHL2,RDH14,ADAR,CCL3L1,HNRNPU,LEF1,GJA1,MYBBP1A,ASF1A,HIRA,BCAP29,BMP4,TP53INP2,SHOX2,CYR61,DNAJC13,EPHA2,NF1,MEF2C,FGF9,--,RSPO2,SFRP1,--,RRBP1,CYP24A1,RBMX,GLI2,CAT,ATP5B,GDF2,GDF10,DDX21,SYNCRIP,WNT3A,MEF2D
GO:0004860	0.0517048	1	18	19	protein kinase inhibitor activity	MF	ENSSSCG00000029772,ENSSSCG00000011414,ENSSSCG00000018057,ENSSSCG00000026082,ENSSSCG00000027855,ENSSSCG00000025900,ENSSSCG00000029888,ENSSSCG00000004878,ENSSSCG00000007684,ENSSSCG00000025701,ENSSSCG00000016998,ENSSSCG00000024938,ENSSSCG00000008437,ENSSSCG00000022098,ENSSSCG00000000910,ENSSSCG00000024009,ENSSSCG00000021409,ENSSSCG00000022998	SOCS3,--,SOCS7,DNAJC3,SOCS1,SH3BP5L,CAMK2N2,SOCS6,PRKRIP1,NCK1,NPM1,SH3BP5,SOCS5,DUS2,SOCS2,CAMK2N1,TRIB1,PKIG
GO:0006383	0.0517162	1	17	18	transcription from RNA polymerase III promoter	BP	ENSSSCG00000022683,ENSSSCG00000022507,ENSSSCG00000009310,ENSSSCG00000000063,ENSSSCG00000000116,ENSSSCG00000010327,ENSSSCG00000000169,ENSSSCG00000021472,ENSSSCG00000004393,ENSSSCG00000009622,ENSSSCG00000007840,ENSSSCG00000021180,ENSSSCG00000000461,ENSSSCG00000012839,ENSSSCG00000007095,ENSSSCG00000006691,ENSSSCG00000028007	TBP,POLR2H,POLR1D,POLR3H,POLR2F,POLR3A,--,POLR2E,GTF3C6,POLR3D,POLR3E,POLR2K,POLR2L,--,POLR3F,POLR3C,POLR1C
GO:0044212	0.0519233	1	137	157	transcription regulatory region DNA binding	MF	ENSSSCG00000021644,ENSSSCG00000006276,ENSSSCG00000022683,ENSSSCG00000026092,ENSSSCG00000024394,ENSSSCG00000021529,ENSSSCG00000011771,ENSSSCG00000025592,ENSSSCG00000016520,ENSSSCG00000023229,ENSSSCG00000004948,ENSSSCG00000002741,ENSSSCG00000004952,ENSSSCG00000022705,ENSSSCG00000002836,ENSSSCG00000010597,ENSSSCG00000000272,ENSSSCG00000029806,ENSSSCG00000015629,ENSSSCG00000021332,ENSSSCG00000024975,…	BRD7,CEBPD,TBP,SREBF2,IKZF4,KLF11,SOX2,TP63,CREB3L2,ETV5,SMAD6,--,SMAD3,SALL2,SALL1,TAF5,SP1,--,--,PAX8,--,H2AFY,KLF15,XRCC6,TFAP2A,--,SOX10,--,ARID5B,FOXA1,--,--,PAX2,EGR2,CALCOCO1,FOS,DDIT3,TCF7L1,--,HAND1,CBX4,ATF5,SALL3,AIRE,CEBPA,NFYB,HHEX,IKZF2,NKX2-1,JUN,PRDM5,HINFP,NKX2-5,HIVEP2,MTA2,FOXA3,NFYC,E2F1,ARID5A,LEF1,GFI1,MTERF2,--,FOXH1,ZNF335,GLIS2,SOX7,ARID4A,HIVEP1,RBBP5,TBL1X,EGR1,AR,NKX3-…
GO:0016311	0.0527811	1	118	137	dephosphorylation	BP	ENSSSCG00000010166,ENSSSCG00000026431,ENSSSCG00000012742,ENSSSCG00000021100,ENSSSCG00000022284,ENSSSCG00000012743,ENSSSCG00000027884,ENSSSCG00000016614,ENSSSCG00000014004,ENSSSCG00000027557,ENSSSCG00000028805,ENSSSCG00000022763,ENSSSCG00000010831,ENSSSCG00000011546,ENSSSCG00000003807,ENSSSCG00000004690,ENSSSCG00000010435,ENSSSCG00000004704,ENSSSCG00000022912,ENSSSCG00000010440,ENSSSCG00000004435,…	NTPCR,ALPL,MTM1,--,DUSP6,MTMR1,--,PTPRZ1,PLPP2,CDC14B,--,--,DUSP10,MTMR14,DNAJC6,--,MINPP1,PPIP5K1,NT5C3A,PTEN,NT5DC1,ACP2,MTMR4,ENOPH1,PTPN11,--,--,--,--,CTDSPL,--,PPP1CA,FBP1,EPM2A,PTPRB,--,--,--,--,PTPRR,--,PTPN13,--,--,SSH3,PTPRH,--,DUSP7,DUPD1,--,PTPN9,DUSP1,DUSP13,--,--,--,STYX,PTPRE,MTMR7,--,DUSP28,BPNT1,DUSP26,--,DUSP5,--,DUSP19,TNS3,NT5M,THTPA,IMPAD1,NT5C1A,--,MTMR2,DUSP2,EPHX2,--,PTPN5,…
GO:0017048	0.0538028	1	21	22	Rho GTPase binding	MF	ENSSSCG00000007247,ENSSSCG00000025114,ENSSSCG00000025306,ENSSSCG00000021189,ENSSSCG00000009448,ENSSSCG00000023292,ENSSSCG00000030072,ENSSSCG00000017333,ENSSSCG00000021893,ENSSSCG00000015866,ENSSSCG00000000784,ENSSSCG00000006502,ENSSSCG00000017905,ENSSSCG00000005078,ENSSSCG00000027012,ENSSSCG00000012474,ENSSSCG00000024223,ENSSSCG00000014387,ENSSSCG00000006475,ENSSSCG00000008629,ENSSSCG00000001595	KIF3B,FMNL3,--,--,--,INF2,IQGAP1,FMNL1,ROCK1,FMNL2,LRRK2,ARHGEF2,PFN1,DAAM1,--,DIAPH2,ARHGEF16,DIAPH1,IQGAP3,ROCK2,DAAM2
GO:0030165	0.0540531	1	37	40	PDZ domain binding	MF	ENSSSCG00000028676,ENSSSCG00000011574,ENSSSCG00000008838,ENSSSCG00000010647,ENSSSCG00000016626,ENSSSCG00000016544,ENSSSCG00000008504,ENSSSCG00000010912,ENSSSCG00000006088,ENSSSCG00000026338,ENSSSCG00000008881,ENSSSCG00000009308,ENSSSCG00000010440,ENSSSCG00000028069,ENSSSCG00000012769,ENSSSCG00000017198,ENSSSCG00000012012,ENSSSCG00000023084,ENSSSCG00000011756,ENSSSCG00000002440,ENSSSCG00000016111,…	--,--,LNX1,ADRB1,CFTR,--,CRIM1,--,SDC2,USHBP1,RAPGEF2,LNX2,PTEN,--,ATP2B3,ACOX1,--,--,NLGN1,CCDC88C,FZD7,--,KCNJ4,F11R,SLC22A4,SLC22A5,ARHGEF16,SLC9A3R1,PLEKHA1,--,FZD4,SSTR2,FZD3,SLC22A12,PDZK1,PLEKHA2,CLCN3
GO:0008289	0.0546065	1	69	82	lipid binding	MF	ENSSSCG00000030601,ENSSSCG00000017761,ENSSSCG00000011419,ENSSSCG00000000036,ENSSSCG00000015067,ENSSSCG00000015068,ENSSSCG00000009348,ENSSSCG00000015069,ENSSSCG00000013033,ENSSSCG00000004720,ENSSSCG00000011831,ENSSSCG00000008585,ENSSSCG00000014130,ENSSSCG00000014202,ENSSSCG00000029714,ENSSSCG00000025052,ENSSSCG00000029295,ENSSSCG00000003546,ENSSSCG00000002619,ENSSSCG00000026137,ENSSSCG00000007259,…	--,--,--,PACSIN2,APOA5,APOA4,--,APOC3,BAD,--,APOD,PFN4,--,STARD4,BPIFB2,BPIFB6,BPIFB4,--,--,BPIFB3,BPIFA2,--,PPARA,BPIFB1,PAQR7,--,STARD10,--,FABP2,FABP7,FABP6,PGRMC1,--,PLIN4,LTC4S,ACBD5,PAQR8,COQ9,FABP3,UNC119B,ANXA6,DBI,PPARD,--,--,--,APOL6,STARD7,BPI,
GO:0043392	0.0549458	1	18	19	negative regulation of DNA binding	BP	ENSSSCG00000030553,ENSSSCG00000010934,ENSSSCG00000025258,ENSSSCG00000016903,ENSSSCG00000004546,ENSSSCG00000008727,ENSSSCG00000007227,ENSSSCG00000016569,ENSSSCG00000022482,ENSSSCG00000030839,ENSSSCG00000007268,ENSSSCG00000001620,ENSSSCG00000009148,ENSSSCG00000017557,ENSSSCG00000005101,ENSSSCG00000009703,ENSSSCG00000008645,ENSSSCG00000015604	CTNNBIP1,--,--,GZMA,SUMO1,MSX1,ID1,SMO,DDIT3,JUN,E2F1,MDFI,LEF1,WFIKKN2,--,HAND2,ID2,NEK2
GO:0006906	0.0550151	1	19	20	vesicle fusion	BP	ENSSSCG00000028008,ENSSSCG00000029615,ENSSSCG00000016635,ENSSSCG00000016750,ENSSSCG00000015482,ENSSSCG00000026293,ENSSSCG00000015539,ENSSSCG00000029262,ENSSSCG00000005386,ENSSSCG00000000703,ENSSSCG00000013119,ENSSSCG00000024927,ENSSSCG00000013752,ENSSSCG00000008231,ENSSSCG00000000912,ENSSSCG00000004190,ENSSSCG00000017984,ENSSSCG00000021537,ENSSSCG00000022820	VAMP3,VAMP7,CAV2,YKT6,VAMP4,STX5,STX6,GOSR1,STX17,VAMP1,STX3,STX12,STX10,--,EEA1,STX7,--,--,VAMP8
GO:0042267	0.0551353	1	11	11	natural killer cell mediated cytotoxicity	BP	ENSSSCG00000004098,ENSSSCG00000004096,ENSSSCG00000004100,ENSSSCG00000026042,ENSSSCG00000028948,ENSSSCG00000002867,ENSSSCG00000003914,ENSSSCG00000010151,ENSSSCG00000001394,ENSSSCG00000001978,ENSSSCG00000025537	--,--,--,ULBP1,--,CEBPG,PRDX1,LYST,MIC-2,GZMB,PTPN6
GO:0071902	0.0565547	1	20	21	positive regulation of protein serine/threonine kinase activity	BP	ENSSSCG00000014298,ENSSSCG00000009203,ENSSSCG00000011550,ENSSSCG00000014441,ENSSSCG00000003169,ENSSSCG00000015784,ENSSSCG00000011290,ENSSSCG00000001858,ENSSSCG00000013879,ENSSSCG00000007334,ENSSSCG00000004929,ENSSSCG00000013429,ENSSSCG00000029879,ENSSSCG00000005524,ENSSSCG00000028840,ENSSSCG00000008022,ENSSSCG00000021584,ENSSSCG00000025455,ENSSSCG00000022080,ENSSSCG00000017730	PPP2CA,SNCA,CAMK1,--,PIH1D1,ACSL1,--,CIB1,SLC27A1,SRC,PARP16,STK11,LTF,DAB2IP,EZH2,TELO2,CDK5R2,RALB,RHOA,CDK5R1
GO:0060716	0.0567827	1	15	15	labyrinthine layer blood vessel development	BP	ENSSSCG00000022155,ENSSSCG00000012758,ENSSSCG00000016628,ENSSSCG00000026362,ENSSSCG00000009772,ENSSSCG00000004038,ENSSSCG00000017338,ENSSSCG00000004223,ENSSSCG00000006940,ENSSSCG00000009860,ENSSSCG00000013735,ENSSSCG00000010081,ENSSSCG00000016140,ENSSSCG00000022197,ENSSSCG00000027550	RBPJ,NSDHL,WNT2,HES1,TMED2,PLG,PLCD3,HEY2,CYR61,FBXW8,--,MAPK1,FZD5,HS6ST1,PLCD1
GO:0016529	0.0571088	1	20	21	sarcoplasmic reticulum	CC	ENSSSCG00000005716,ENSSSCG00000008588,ENSSSCG00000027613,ENSSSCG00000004231,ENSSSCG00000024517,ENSSSCG00000001965,ENSSSCG00000015402,ENSSSCG00000009856,ENSSSCG00000008522,ENSSSCG00000009123,ENSSSCG00000010142,ENSSSCG00000007805,ENSSSCG00000029333,ENSSSCG00000005110,ENSSSCG00000029651,ENSSSCG00000002961,ENSSSCG00000006390,ENSSSCG00000003156,ENSSSCG00000013746,ENSSSCG00000006174	POMT1,FKBP1B,--,--,--,--,CACNA2D1,NOS1,XDH,CAMK2D,RYR2,ATP2A1,RASD1,SYNE2,SLN,RYR1,CASQ1,HRC,CALR,JPH1
GO:0045773	0.0572	1	15	15	positive regulation of axon extension	BP	ENSSSCG00000023165,ENSSSCG00000027130,ENSSSCG00000018032,ENSSSCG00000016974,ENSSSCG00000030378,ENSSSCG00000017311,ENSSSCG00000017993,ENSSSCG00000011889,ENSSSCG00000003654,ENSSSCG00000016174,ENSSSCG00000025008,ENSSSCG00000022696,ENSSSCG00000001661,ENSSSCG00000011243,ENSSSCG00000025784	SEMA7A,TNFRSF12A,TRPV2,MAP1B,LIMK1,MAPT,--,GSK3B,MACF1,FN1,--,RAB11A,SRF,GOLGA4,CDH4
GO:0071310	0.0572125	1	18	19	cellular response to organic substance	BP	ENSSSCG00000011528,ENSSSCG00000006125,ENSSSCG00000017797,ENSSSCG00000004346,ENSSSCG00000010224,ENSSSCG00000012292,ENSSSCG00000011299,ENSSSCG00000010281,ENSSSCG00000004895,ENSSSCG00000009831,ENSSSCG00000014336,ENSSSCG00000012873,ENSSSCG00000017517,ENSSSCG00000021657,ENSSSCG00000000155,ENSSSCG00000000182,ENSSSCG00000006475,ENSSSCG00000003144	IL5RA,CALB1,SLC6A4,POU3F2,EGR2,SYP,CLEC3B,PSAP,BCL2,CUX2,EGR1,--,TBX21,--,TIMP3,WNT10B,IQGAP3,BAX
GO:0002931	0.0573532	1	13	13	response to ischemia	BP	ENSSSCG00000016634,ENSSSCG00000022945,ENSSSCG00000000206,ENSSSCG00000010737,ENSSSCG00000000975,ENSSSCG00000014951,ENSSSCG00000016981,ENSSSCG00000004366,ENSSSCG00000004895,ENSSSCG00000001858,ENSSSCG00000024219,ENSSSCG00000015106,ENSSSCG00000022457	CAV1,UCHL1,FAIM2,FAM175B,PANX2,PANX1,CPEB4,BVES,BCL2,CIB1,TIGAR,HYOU1,NOL3
GO:0051018	0.0576085	1	13	13	protein kinase A binding	MF	ENSSSCG00000004091,ENSSSCG00000014855,ENSSSCG00000000784,ENSSSCG00000009430,ENSSSCG00000016256,ENSSSCG00000024517,ENSSSCG00000004014,ENSSSCG00000001965,ENSSSCG00000012306,ENSSSCG00000017475,ENSSSCG00000022280,ENSSSCG00000026468,ENSSSCG00000000720	AKAP12,RPS3,LRRK2,AKAP11,SPHKAP,--,DACT2,--,--,RARA,DACT3,--,AKAP3
GO:0097190	0.0577295	1	37	41	apoptotic signaling pathway	BP	ENSSSCG00000010448,ENSSSCG00000016464,ENSSSCG00000016634,ENSSSCG00000013033,ENSSSCG00000000816,ENSSSCG00000015092,ENSSSCG00000012861,ENSSSCG00000017548,ENSSSCG00000031047,ENSSSCG00000013115,ENSSSCG00000031023,ENSSSCG00000016101,ENSSSCG00000014825,ENSSSCG00000001516,ENSSSCG00000029328,ENSSSCG00000026940,ENSSSCG00000024771,ENSSSCG00000022208,ENSSSCG00000007440,ENSSSCG00000004898,ENSSSCG00000000706,…	FAS,CASP2,CAV1,BAD,SENP1,CD3E,--,NGFR,CH242-363D24.1,CD5,--,CFLAR,RELT,BAK1,--,CASP10,TICAM1,TNFRSF1B,CD40,TNFRSF11A,LTBR,ANXA6,TNFRSF4,P2RX4,TFPT,PPARD,PTGIS,DAPL1,SGPL1,HIP1,TNFRSF8,TNFRSF11B,BAX,SPN,TNF,TNFRSF25,MLLT11
GO:0030182	0.0578446	1	67	77	neuron differentiation	BP	ENSSSCG00000022755,ENSSSCG00000009034,ENSSSCG00000016419,ENSSSCG00000024070,ENSSSCG00000022155,ENSSSCG00000016883,ENSSSCG00000016617,ENSSSCG00000010390,ENSSSCG00000015986,ENSSSCG00000016628,ENSSSCG00000021398,ENSSSCG00000005774,ENSSSCG00000000759,ENSSSCG00000001710,ENSSSCG00000025551,ENSSSCG00000010581,ENSSSCG00000008649,ENSSSCG00000010199,ENSSSCG00000004346,ENSSSCG00000025334,ENSSSCG00000011618,…	--,--,EN2,CDK5,RBPJ,ISL1,WNT16,DRGX,HOXD1,WNT2,WNT9B,ADNP2,--,--,--,PSD,SOX11,RET,POU3F2,POU4F1,GATA2,RYK,EMX2,--,--,TRAPPC9,EMX1,BARHL2,RB1,--,--,EN1,--,NR4A2,NAPA,LMX1A,LDB1,EPHA2,TAL1,WNT7B,MEF2C,WNT7A,WNT5A,TLX3,PROX2,PCSK9,ITM2C,RUNX1,--,WNT10B,--,WN
GO:0086091	0.0585457	1	22	23	regulation of heart rate by cardiac conduction	BP	ENSSSCG00000024800,ENSSSCG00000017252,ENSSSCG00000001025,ENSSSCG00000016448,ENSSSCG00000016634,ENSSSCG00000001920,ENSSSCG00000006696,ENSSSCG00000029199,ENSSSCG00000021651,ENSSSCG00000017295,ENSSSCG00000015402,ENSSSCG00000012582,ENSSSCG00000009125,ENSSSCG00000011040,ENSSSCG00000017428,ENSSSCG00000022739,ENSSSCG00000023267,ENSSSCG00000021596,ENSSSCG00000012045,ENSSSCG00000012049,ENSSSCG00000011204,…	DSC2,KCNJ2,DSP,--,CAV1,HCN4,GJA5,SCN4B,SCN2B,KCNH6,CACNA2D1,KCNE5,ANK2,CACNB2,JUP,DSG2,SCN1B,KCNA5,KCNE2,--,--,CACNA1G
GO:0035924	0.0585924	1	14	14	cellular response to vascular endothelial growth factor stimulus	BP	ENSSSCG00000008844,ENSSSCG00000024996,ENSSSCG00000014007,ENSSSCG00000017279,ENSSSCG00000004755,ENSSSCG00000011102,ENSSSCG00000009320,ENSSSCG00000017389,ENSSSCG00000029313,ENSSSCG00000026152,ENSSSCG00000001556,ENSSSCG00000015650,ENSSSCG00000005524,ENSSSCG00000009630	KDR,--,FLT4,ERN1,DLL4,NRP1,FLT1,RAMP2,ITGB1BP1,PRKD2,MAPK14,MAPKAPK2,DAB2IP,EGR3
GO:0050852	0.0593768	1	36	42	T cell receptor signaling pathway	BP	ENSSSCG00000026803,ENSSSCG00000008820,ENSSSCG00000027788,ENSSSCG00000002063,ENSSSCG00000028680,ENSSSCG00000021666,ENSSSCG00000002085,ENSSSCG00000022863,ENSSSCG00000028409,ENSSSCG00000002095,ENSSSCG00000027795,ENSSSCG00000003805,ENSSSCG00000025591,ENSSSCG00000000481,ENSSSCG00000008819,ENSSSCG00000005302,ENSSSCG00000016929,ENSSSCG00000015092,ENSSSCG00000005358,ENSSSCG00000012300,ENSSSCG00000008193,…	--,TEC,TRAV36DV7,--,--,--,--,--,--,TRAV10,--,PDE4B,HRAS,IFNG,--,STOML2,PDE4D,CD3E,--,FOXP3,ZAP70,SPPL3,--,PRKD2,MAPK1,FYN,--,CD247,STK11,PLCG1,THEMIS2,UBE2N,SKAP1,GATA3,CACNB4,TRAF6
GO:0005921	0.0603035	1	18	19	gap junction	CC	ENSSSCG00000021992,ENSSSCG00000004330,ENSSSCG00000006696,ENSSSCG00000000975,ENSSSCG00000014951,ENSSSCG00000003585,ENSSSCG00000015194,ENSSSCG00000003650,ENSSSCG00000004241,ENSSSCG00000012394,ENSSSCG00000004805,ENSSSCG00000017474,ENSSSCG00000021509,ENSSSCG00000002730,ENSSSCG00000011108,ENSSSCG00000006002,ENSSSCG00000013989,ENSSSCG00000004299	--,GJA10,GJA5,PANX2,PANX1,GJB5,--,GJA9,GJA1,GJB1,GJD2,GJD3,GJA4,CALB2,GJD4,NOV,GJC2,GJB7
GO:0033209	0.0603098	1	35	40	tumor necrosis factor-mediated signaling pathway	BP	ENSSSCG00000007941,ENSSSCG00000003386,ENSSSCG00000005838,ENSSSCG00000007251,ENSSSCG00000015488,ENSSSCG00000015487,ENSSSCG00000009633,ENSSSCG00000012861,ENSSSCG00000007030,ENSSSCG00000017548,ENSSSCG00000025094,ENSSSCG00000009429,ENSSSCG00000031047,ENSSSCG00000009637,ENSSSCG00000002525,ENSSSCG00000009636,ENSSSCG00000004387,ENSSSCG00000014825,ENSSSCG00000030644,ENSSSCG00000022208,ENSSSCG00000007440,…	CDIP1,TNFRSF9,TRAF2,COMMD7,TNFSF4,TNFSF18,--,--,IKBKB,NGFR,--,TNFSF11,CH242-363D24.1,--,TRAF3,--,FOXO3,RELT,--,TNFRSF1B,CD40,CD27,PTK2B,TNFRSF11A,LTBR,TNFRSF4,TNFRSF1A,--,KRT8,KRT18,TNFRSF8,TNFRSF11B,TNF,TNFRSF25,--
GO:0001228	0.0610073	1	67	76	transcriptional activator activity, RNA polymerase II transcription regulatory region sequence-specific binding	MF	ENSSSCG00000027648,ENSSSCG00000022155,ENSSSCG00000015983,ENSSSCG00000023229,ENSSSCG00000005730,ENSSSCG00000002787,ENSSSCG00000015475,ENSSSCG00000011264,ENSSSCG00000026533,ENSSSCG00000005755,ENSSSCG00000008727,ENSSSCG00000001940,ENSSSCG00000010814,ENSSSCG00000003539,ENSSSCG00000011880,ENSSSCG00000000068,ENSSSCG00000000992,ENSSSCG00000011618,ENSSSCG00000001943,ENSSSCG00000025754,ENSSSCG00000003846,…	TRPS1,RBPJ,HOXD8,ETV5,BARHL1,E2F4,MYOG,CSRNP1,MYF6,SOHLH1,MSX1,FOXA1,ESRRG,GRHL3,EAF2,EP300,FOXF2,GATA2,PAX9,ZGLP1,GLIS1,CEBPA,LMO2,MSGN1,PLAGL1,BARX1,BARHL2,BHLHA15,NKX2-5,RXRB,HSF2,LEF1,NRL,ONECUT1,GRHL2,FOXO3,NR1I2,NR4A2,CSRNP3,GATA4,GATA6,MAFK,HNF1A,BARX2,NR1I3,MAFB,RUNX1,TBX5,MAFF,TP53,SRF,ONECUT3,MYOD1,OSR2,HNF4A,CREB3L3,IRF2,IKZF3,SOX9,--,RAD21,GATA3,DLX2,SOX17,ARID3A,CREB3L4,GATA5
GO:0030336	0.0614613	1	49	54	negative regulation of cell migration	BP	ENSSSCG00000009004,ENSSSCG00000015048,ENSSSCG00000014391,ENSSSCG00000025270,ENSSSCG00000016453,ENSSSCG00000016459,ENSSSCG00000010834,ENSSSCG00000011722,ENSSSCG00000006197,ENSSSCG00000030708,ENSSSCG00000010440,ENSSSCG00000010052,ENSSSCG00000005338,ENSSSCG00000025698,ENSSSCG00000023609,ENSSSCG00000001945,ENSSSCG00000008749,ENSSSCG00000030270,ENSSSCG00000017804,ENSSSCG00000004895,ENSSSCG00000005437,…	SFRP2,DRD2,ARAP3,CHRD,TCAF1,EPHA1,MIA3,RAP2B,SULF1,DAG1,PTEN,BCR,RECK,SERPINE1,TP53INP1,NKX2-1,SLIT2,CNN2,ABR,BCL2,KLF4,--,RHOB,PODN,ARHGAP4,ACVRL1,DPEP1,NF1,STC1,SFRP1,RRAS,PLXNB3,STK24,--,ABHD2,TBX5,PTPRJ,--,PTPRU,SLC9A3R1,SRGAP1,NISCH,ABHD6,FUZ,RAP2C,SCAI,TIE1,ENG,LDLRAD4
GO:0001580	0.0619322	1	14	15	detection of chemical stimulus involved in sensory perception of bitter taste	BP	ENSSSCG00000024593,ENSSSCG00000011805,ENSSSCG00000011809,ENSSSCG00000028554,ENSSSCG00000016467,ENSSSCG00000021954,ENSSSCG00000003391,ENSSSCG00000026584,ENSSSCG00000015406,ENSSSCG00000017636,ENSSSCG00000007642,ENSSSCG00000028394,ENSSSCG00000021525,ENSSSCG00000006823	--,RTP1,--,TAS2R1,TAS2R40,TAS2R39,CA6,--,GNAT3,LPO,AZGP1,TAS2R3,TAS2R4,--
GO:0030425	0.0622833	1	104	119	dendrite	CC	ENSSSCG00000029894,ENSSSCG00000015048,ENSSSCG00000002823,ENSSSCG00000011524,ENSSSCG00000023480,ENSSSCG00000000614,ENSSSCG00000005285,ENSSSCG00000025592,ENSSSCG00000008697,ENSSSCG00000005698,ENSSSCG00000016621,ENSSSCG00000000292,ENSSSCG00000004956,ENSSSCG00000000478,ENSSSCG00000030430,ENSSSCG00000006125,ENSSSCG00000001918,ENSSSCG00000000277,ENSSSCG00000011831,ENSSSCG00000010046,ENSSSCG00000000682,…	--,DRD2,GNAO1,CHL1,KCNA2,GRIN2B,--,TP63,HTT,NCS1,--,ZNF385A,SKOR1,GRIP1,RPL28,CALB1,NPTN,NPFF,APOD,GNAZ,GNB3,MME,GABRA2,HDAC6,ALS2,AGO2,DPYSL2,CPEB4,TUBB3,--,RIN1,GRIK1,--,GCHFR,LRRK2,RAB27A,EPHA4,TRIM9,MAPK8IP1,--,MAPT,PRSS12,CPNE6,CNIH2,--,PRKCG,GRIN3A,
GO:0001816	0.0629175	1	14	14	cytokine production	BP	ENSSSCG00000010450,ENSSSCG00000005742,ENSSSCG00000028258,ENSSSCG00000002755,ENSSSCG00000030582,ENSSSCG00000012300,ENSSSCG00000004791,ENSSSCG00000009580,ENSSSCG00000000799,ENSSSCG00000007477,ENSSSCG00000003859,ENSSSCG00000007808,ENSSSCG00000015105,ENSSSCG00000015885	LIPA,DBH,AZI2,NFAT5,BATF,FOXP3,RASGRP1,S1PR3,IRAK4,NFATC2,ZCCHC11,NFATC2IP,SLC37A4,PLA2R1
GO:0008134	0.0633112	1	170	199	transcription factor binding	MF	ENSSSCG00000021644,ENSSSCG00000022683,ENSSSCG00000021560,ENSSSCG00000025452,ENSSSCG00000029275,ENSSSCG00000028391,ENSSSCG00000015370,ENSSSCG00000008692,ENSSSCG00000022155,ENSSSCG00000008697,ENSSSCG00000021380,ENSSSCG00000015622,ENSSSCG00000004952,ENSSSCG00000000622,ENSSSCG00000016435,ENSSSCG00000002630,ENSSSCG00000000272,ENSSSCG00000004546,ENSSSCG00000008690,ENSSSCG00000002787,ENSSSCG00000005291,…	BRD7,TBP,UBE2I,--,PPARGC1A,--,TWIST1,ADD1,RBPJ,HTT,UBXN7,CD34,SMAD3,--,SMARCD3,GCM1,SP1,SUMO1,RNF4,E2F4,TLE1,POU1F1,RORA,APBB2,SOX10,ZBTB49,FOXA1,--,GTF2A2,PAX2,KAT2B,PSMC5,EP300,FOXF2,SUFU,FOS,DDIT3,GATA2,NEUROD1,LMO4,NAAA,HAND1,--,FOXO1,HEY2,FHL2,CEBPA,HHEX,VHLL,MED1,JUN,RPS3,CEBPG,KAT2A,RB1,CHD4,KAT6B,NKX2-5,CRY1,TAF11,--,FOXA3,MED12,E2F1,MDFI,LEF1,DACT2,--,--,--,BCL2,PARP1,--,SIRT1,YWHAZ,DIP2…
GO:0060291	0.0642289	1	21	22	long-term synaptic potentiation	BP	ENSSSCG00000021269,ENSSSCG00000009203,ENSSSCG00000002315,ENSSSCG00000010440,ENSSSCG00000007768,ENSSSCG00000017343,ENSSSCG00000023859,ENSSSCG00000004384,ENSSSCG00000015508,ENSSSCG00000014039,ENSSSCG00000026985,ENSSSCG00000016233,ENSSSCG00000010081,ENSSSCG00000001518,ENSSSCG00000013119,ENSSSCG00000022856,ENSSSCG00000005167,ENSSSCG00000012796,ENSSSCG00000017984,ENSSSCG00000015426,ENSSSCG00000013984	SHANK3,SNCA,SLC8A3,PTEN,STX4,GFAP,LRRTM1,NR2E1,TNR,RGS14,SNAP25,SERPINE2,MAPK1,ITPR3,STX3,--,SLC24A2,MECP2,--,RELN,SNAP47
GO:0046697	0.0653821	1	11	11	decidualization	BP	ENSSSCG00000009996,ENSSSCG00000011568,ENSSSCG00000004142,ENSSSCG00000028637,ENSSSCG00000011754,ENSSSCG00000006364,ENSSSCG00000007463,ENSSSCG00000013735,ENSSSCG00000013618,ENSSSCG00000023666,ENSSSCG00000020864	LIF,GHRL,CITED2,CYP27B1,GHSR,DEDD,PTGIS,--,EPOR,CTSB,VDR
GO:0008285	0.066083	1	176	207	negative regulation of cell proliferation	BP	ENSSSCG00000021644,ENSSSCG00000009004,ENSSSCG00000006282,ENSSSCG00000021033,ENSSSCG00000015048,ENSSSCG00000020672,ENSSSCG00000016878,ENSSSCG00000030071,ENSSSCG00000021529,ENSSSCG00000016612,ENSSSCG00000016450,ENSSSCG00000010452,ENSSSCG00000010998,ENSSSCG00000022155,ENSSSCG00000016885,ENSSSCG00000027140,ENSSSCG00000011813,ENSSSCG00000001912,ENSSSCG00000004948,ENSSSCG00000015353,ENSSSCG00000000363,…	BRD7,SFRP2,KIFAP3,--,DRD2,F2R,FGF10,--,KLF11,FEZF1,NOS3,IFIT3,B4GALT1,RBPJ,ITGA1,CDKN1B,P3H2,PML,SMAD6,SCIN,GDF11,LIF,SPRY1,OSM,CAV1,HRAS,--,--,CAV2,TES,MYOG,PTCH1,NR2E3,RAPGEF2,EREG,MSX1,TFAP2A,E2F7,--,PIM2,--,ZBTB49,--,DLL1,KAT2B,--,PTEN,BTG2,DNAJA3,P3H3,--,LZTS2,DPT,NUP62,--,BNIPL,ATF5,COPS8,SMAD1,--,CEBPA,ETV3,TP53INP1,ENPP7,JUN,DLL4,RB1,HSF1,INPPL1,FOXP3,INHBA,SPRY2,CLMN,CYP27B1,ING4,INPP5D,…
GO:0090023	0.0661613	1	11	11	positive regulation of neutrophil chemotaxis	BP	ENSSSCG00000023868,ENSSSCG00000027291,ENSSSCG00000008953,ENSSSCG00000028968,ENSSSCG00000029371,ENSSSCG00000010965,ENSSSCG00000010966,ENSSSCG00000017466,ENSSSCG00000021944,ENSSSCG00000028758,ENSSSCG00000027955	C3AR1,--,CXCL8,RAC1,C5AR1,CCL21,CCL19,CCR7,RAC3,LBP,CAMK1D
GO:0044255	0.0662865	1	13	13	cellular lipid metabolic process	BP	ENSSSCG00000010175,ENSSSCG00000024719,ENSSSCG00000010943,ENSSSCG00000008121,ENSSSCG00000014811,ENSSSCG00000005939,ENSSSCG00000003211,ENSSSCG00000004275,ENSSSCG00000010631,ENSSSCG00000028144,ENSSSCG00000025252,ENSSSCG00000013241,ENSSSCG00000026109	GNPAT,--,--,GPAT2,INPPL1,FAM135B,NR1H2,FAM135A,GPAM,EPHX3,PEX5,NR1H3,STAR
GO:0003151	0.0663242	1	29	31	outflow tract morphogenesis	BP	ENSSSCG00000008993,ENSSSCG00000009004,ENSSSCG00000022155,ENSSSCG00000016883,ENSSSCG00000026362,ENSSSCG00000016662,ENSSSCG00000008888,ENSSSCG00000008889,ENSSSCG00000006696,ENSSSCG00000008649,ENSSSCG00000027060,ENSSSCG00000011592,ENSSSCG00000023272,ENSSSCG00000009142,ENSSSCG00000004223,ENSSSCG00000030839,ENSSSCG00000016984,ENSSSCG00000004142,ENSSSCG00000005902,ENSSSCG00000023784,ENSSSCG00000005045,…	NPY2R,SFRP2,RBPJ,ISL1,HES1,TBX20,NPY1R,NPY5R,GJA5,SOX11,TBX2,PLXND1,ILK,SEC24B,HEY2,JUN,NKX2-5,CITED2,FOXH1,--,BMP4,SIX1,--,MEF2C,HEYL,TBX3,RYR1,DHRS3,SOX17
GO:0044325	0.0665072	1	54	61	ion channel binding	MF	ENSSSCG00000000033,ENSSSCG00000008697,ENSSSCG00000016453,ENSSSCG00000004546,ENSSSCG00000007188,ENSSSCG00000016634,ENSSSCG00000009217,ENSSSCG00000016929,ENSSSCG00000024437,ENSSSCG00000005826,ENSSSCG00000029199,ENSSSCG00000025959,ENSSSCG00000008588,ENSSSCG00000000784,ENSSSCG00000007265,ENSSSCG00000024517,ENSSSCG00000001965,ENSSSCG00000012582,ENSSSCG00000025768,ENSSSCG00000021977,ENSSSCG00000001516,…	TSPO,HTT,TCAF1,SUMO1,FKBP1A,CAV1,PKD2,PDE4D,AP2M1,PHPT1,SCN4B,--,FKBP1B,LRRK2,SNTA1,--,--,KCNE5,CALM1,GPD1L,BAK1,CAMK2D,ANK2,KCNIP2,PACS1,KCNE4,--,CIB1,FXYD1,KCNB1,NEDD4L,SRC,PKD1,FYN,YWHAH,ACTN4,KCNE2,--,HRC,LYN,--,ID2,DIAPH1,RNF207,ABCC8,S100A10,RIMS4,ACTN2,SCN10A,KCNJ11,CHERP,TCAP,RANGRF,VDAC1
GO:0043523	0.066954	1	13	13	regulation of neuron apoptotic process	BP	ENSSSCG00000025592,ENSSSCG00000010912,ENSSSCG00000017029,ENSSSCG00000000206,ENSSSCG00000026213,ENSSSCG00000004827,ENSSSCG00000014149,ENSSSCG00000025020,ENSSSCG00000029899,ENSSSCG00000003506,ENSSSCG00000003144,ENSSSCG00000011125,ENSSSCG00000003385	TP63,--,GABRB2,FAIM2,--,GABRA5,MEF2C,PCSK9,SIGMAR1,PINK1,BAX,GATA3,PARK7
GO:0046513	0.0671032	1	17	18	ceramide biosynthetic process	BP	ENSSSCG00000016492,ENSSSCG00000002404,ENSSSCG00000024932,ENSSSCG00000013922,ENSSSCG00000006644,ENSSSCG00000024484,ENSSSCG00000025386,ENSSSCG00000006522,ENSSSCG00000010319,ENSSSCG00000027015,ENSSSCG00000013595,ENSSSCG00000004819,ENSSSCG00000014627,ENSSSCG00000017980,ENSSSCG00000015922,ENSSSCG00000002512,ENSSSCG00000009594	AGK,SPTLC2,--,--,CERS2,DEGS1,SPTSSA,GBA,SAMD8,FAM57B,CERS4,CERS3,SMPD1,ALOX12B,--,DEGS2,SPTLC1
GO:0019900	0.0677511	1	44	49	kinase binding	MF	ENSSSCG00000028102,ENSSSCG00000024182,ENSSSCG00000010448,ENSSSCG00000001701,ENSSSCG00000008710,ENSSSCG00000008509,ENSSSCG00000005312,ENSSSCG00000021129,ENSSSCG00000017290,ENSSSCG00000011207,ENSSSCG00000014420,ENSSSCG00000003201,ENSSSCG00000021005,ENSSSCG00000002866,ENSSSCG00000008589,ENSSSCG00000014855,ENSSSCG00000028197,ENSSSCG00000009401,ENSSSCG00000000164,ENSSSCG00000027286,ENSSSCG00000028572,…	TOLLIP,TRADD,FAS,HSP90AB1,JAKMIP1,RASGRP3,SIT1,PFKM,--,SGO1,JAKMIP2,ATF5,UBQLN1,CEBPA,WDCP,RPS3,PFKL,RB1,CRY1,DGKQ,PER3,PRKCD,CDC37,PRDX3,CDC6,MOB1B,TNFAIP3,JAKMIP3,ITGB1BP1,SRC,PARP16,WWC2,EMP2,PPP2R5A,DAB2IP,PER1,--,STUB1,STX1A,CRY2,--,PIP5K1A,PARK7,TRIP6
GO:0045165	0.0684324	1	48	54	cell fate commitment	BP	ENSSSCG00000027648,ENSSSCG00000022155,ENSSSCG00000016617,ENSSSCG00000001912,ENSSSCG00000016628,ENSSSCG00000021398,ENSSSCG00000026362,ENSSSCG00000021920,ENSSSCG00000000300,ENSSSCG00000000759,ENSSSCG00000011618,ENSSSCG00000016011,ENSSSCG00000004223,ENSSSCG00000006299,ENSSSCG00000006914,ENSSSCG00000004616,ENSSSCG00000009482,ENSSSCG00000004384,ENSSSCG00000026855,ENSSSCG00000022347,ENSSSCG00000005045,…	TRPS1,RBPJ,WNT16,PML,WNT2,WNT9B,HES1,SOX12,NEUROD4,--,GATA2,NEUROD1,HEY2,TBX19,BARHL2,ONECUT1,SPRY2,NR2E1,--,--,BMP4,GDF7,HOXA2,GATA4,TAL1,WNT7B,GATA6,GAP43,MEF2C,WNT7A,SMAD2,WNT5A,PTF1A,POU5F1,ONECUT2,WNT10B,WNT1,--,WNT8B,SOX9,WNT2B,--,ROR2,GATA3,WNT3A,WNT9A,KDM6B,GATA5
GO:0000028	0.070039	1	19	21	ribosomal small subunit assembly	BP	ENSSSCG00000025871,ENSSSCG00000023158,ENSSSCG00000011266,ENSSSCG00000029627,ENSSSCG00000023810,ENSSSCG00000025403,ENSSSCG00000004002,ENSSSCG00000021912,ENSSSCG00000027358,ENSSSCG00000005104,ENSSSCG00000027733,ENSSSCG00000027375,ENSSSCG00000017776,ENSSSCG00000022428,ENSSSCG00000023248,ENSSSCG00000003042,ENSSSCG00000014078,ENSSSCG00000006558,ENSSSCG00000001528	--,RPS27L,RPSA,--,--,--,RPS5,--,RPS17,MRPS11,RRP7A,--,ERAL1,--,RPS15,--,--,RPS27,RPS10
GO:0071158	0.0721287	1	18	19	positive regulation of cell cycle arrest	BP	ENSSSCG00000015475,ENSSSCG00000009217,ENSSSCG00000025334,ENSSSCG00000013771,ENSSSCG00000023880,ENSSSCG00000017882,ENSSSCG00000017743,ENSSSCG00000009434,ENSSSCG00000003702,ENSSSCG00000005101,ENSSSCG00000017950,ENSSSCG00000008645,ENSSSCG00000005524,ENSSSCG00000007106,ENSSSCG00000022101,ENSSSCG00000003197,ENSSSCG00000015896,ENSSSCG00000017730	MYOG,PKD2,POU4F1,PRKACA,RRP8,MYBBP1A,CRLF3,RGCC,GATA6,--,TP53,ID2,DAB2IP,INSM1,BRCA1,MED25,FAP,CDK5R1
GO:0070403	0.0727529	1	11	11	NAD+ binding	MF	ENSSSCG00000021810,ENSSSCG00000009150,ENSSSCG00000009268,ENSSSCG00000010235,ENSSSCG00000030526,ENSSSCG00000014558,ENSSSCG00000009699,ENSSSCG00000009901,ENSSSCG00000013496,ENSSSCG00000026794,ENSSSCG00000008143	--,HADH,CRYL1,SIRT1,--,SIRT3,--,SIRT4,SIRT6,SIRT2,UXS1
GO:0048387	0.0727975	1	13	13	negative regulation of retinoic acid receptor signaling pathway	BP	ENSSSCG00000007248,ENSSSCG00000008311,ENSSSCG00000029234,ENSSSCG00000002799,ENSSSCG00000028840,ENSSSCG00000013746,ENSSSCG00000003439,ENSSSCG00000003444,ENSSSCG00000003443,ENSSSCG00000030674,ENSSSCG00000003447,ENSSSCG00000003445,ENSSSCG00000003446	ASXL1,CYP26B1,ZNF536,CNOT1,EZH2,CALR,DHRS3,--,--,--,--,--,--
GO:0005576	0.0729049	1	518	676	extracellular region	CC	ENSSSCG00000028935,ENSSSCG00000016178,ENSSSCG00000026123,ENSSSCG00000028847,ENSSSCG00000028836,ENSSSCG00000020697,ENSSSCG00000009004,ENSSSCG00000006215,ENSSSCG00000007180,ENSSSCG00000026200,ENSSSCG00000021171,ENSSSCG00000025328,ENSSSCG00000027146,ENSSSCG00000028528,ENSSSCG00000016878,ENSSSCG00000021700,ENSSSCG00000009527,ENSSSCG00000011806,ENSSSCG00000010448,ENSSSCG00000011808,ENSSSCG00000014094,…	INSL5,--,IGFBP2,DSC3,--,--,SFRP2,CRH,PDYN,PROK2,--,--,GLA,--,FGF10,--,FGF14,MASP1,FAS,SST,AGGF1,--,--,--,--,DNASE2B,--,WNT16,PRRG3,IL15,--,HMCN2,--,CD34,THPO,AOC1,--,VWA2,--,IL17B,SNCA,GDF11,DKK1,IL-6,--,HGFAC,BMP6,--,WNT2,LIF,FGF1,--,--,--,IL6,--,APOA5,WNT9B,--,GALP,HP,OSM,--,APOA4,PDGFC,IL21,EMILIN2,--,APOC3,IFNG,B2M,CXCL8,--,FSHB,BGLAP,PPBP,--,PAEP,PF4,LCN9,CXCL2,CHI3L1,--,HTRA3,--,CHIT1,--,BD…
GO:0016757	0.075192	1	110	128	transferase activity, transferring glycosyl groups	MF	ENSSSCG00000028199,ENSSSCG00000005464,ENSSSCG00000011519,ENSSSCG00000027159,ENSSSCG00000002050,ENSSSCG00000016430,ENSSSCG00000002306,ENSSSCG00000010998,ENSSSCG00000009335,ENSSSCG00000012070,ENSSSCG00000010185,ENSSSCG00000025089,ENSSSCG00000024393,ENSSSCG00000016436,ENSSSCG00000010307,ENSSSCG00000010800,ENSSSCG00000028961,ENSSSCG00000020957,ENSSSCG00000008902,ENSSSCG00000013530,ENSSSCG00000007244,…	--,--,GXYLT2,--,DAD1,GALNT11,GALNT16,B4GALT1,B3GLCT,B3GALT5,GALNT2,ST3GAL2,B3GNT5,CHPF2,FUT11,B3GALT2,ST8SIA5,--,PPAT,--,POFUT1,--,--,DDOST,MGAT1,GALNT10,--,GLT8D2,MGAT5,ALG12,--,--,--,PYGL,--,GALNT12,MGAT4B,--,NAMPT,--,FUT4,ST3GAL4,--,FUT2,--,B3GALT6,ST6
GO:0031235	0.0753491	1	13	13	intrinsic component of the cytoplasmic side of the plasma membrane	CC	ENSSSCG00000015526,ENSSSCG00000011672,ENSSSCG00000014146,ENSSSCG00000001513,ENSSSCG00000027890,ENSSSCG00000015519,ENSSSCG00000017748,ENSSSCG00000013839,ENSSSCG00000024211,ENSSSCG00000005524,ENSSSCG00000009567,ENSSSCG00000017496,ENSSSCG00000009874	NPHS2,RASA2,RASA1,SYNGAP1,--,RASAL2,NF1,RASAL3,--,DAB2IP,RASA3,MIEN1,RASAL1
GO:0034446	0.0753715	1	30	32	substrate adhesion-dependent cell spreading	BP	ENSSSCG00000028008,ENSSSCG00000005706,ENSSSCG00000016459,ENSSSCG00000026516,ENSSSCG00000010912,ENSSSCG00000028968,ENSSSCG00000023272,ENSSSCG00000004744,ENSSSCG00000008340,ENSSSCG00000004366,ENSSSCG00000003005,ENSSSCG00000016009,ENSSSCG00000013041,ENSSSCG00000016174,ENSSSCG00000015555,ENSSSCG00000014574,ENSSSCG00000007557,ENSSSCG00000016111,ENSSSCG00000007334,ENSSSCG00000018056,ENSSSCG00000015444,…	VAMP3,ABL1,EPHA1,EPHB3,--,RAC1,ILK,TYRO3,ANTXR1,BVES,--,ITGA4,FERMT3,FN1,LAMC1,AKIP1,MICALL2,FZD7,SRC,SRCIN1,LAMB1,TEK,ITGA8,ITGAV,ITGB7,RADIL,FZD4,EFNA1,PEAK1,PARVA
GO:0050699	0.0760891	1	21	23	WW domain binding	MF	ENSSSCG00000000289,ENSSSCG00000025592,ENSSSCG00000012526,ENSSSCG00000012527,ENSSSCG00000012531,ENSSSCG00000012532,ENSSSCG00000010457,ENSSSCG00000008881,ENSSSCG00000027972,ENSSSCG00000009480,ENSSSCG00000010850,ENSSSCG00000006521,ENSSSCG00000014329,ENSSSCG00000007836,ENSSSCG00000000707,ENSSSCG00000008273,ENSSSCG00000007509,ENSSSCG00000024982,ENSSSCG00000000611,ENSSSCG00000028062,ENSSSCG00000012523	NFE2,TP63,TCEAL7,TCEAL9,CH242-51F15.2,TCEAL1,KIF20B,RAPGEF2,--,NDFIP2,ENAH,FAM189B,CDC25C,SCNN1G,SCNN1A,--,PMEPA1,LITAF,WBP11,TCEAL3,TCEAL8
GO:0005546	0.0765986	1	31	34	phosphatidylinositol-4,5-bisphosphate binding	MF	ENSSSCG00000017252,ENSSSCG00000006225,ENSSSCG00000016742,ENSSSCG00000030260,ENSSSCG00000000948,ENSSSCG00000023269,ENSSSCG00000022882,ENSSSCG00000004578,ENSSSCG00000021906,ENSSSCG00000003549,ENSSSCG00000016005,ENSSSCG00000012361,ENSSSCG00000007425,ENSSSCG00000021843,ENSSSCG00000017905,ENSSSCG00000022661,ENSSSCG00000002726,ENSSSCG00000000798,ENSSSCG00000015236,ENSSSCG00000029359,ENSSSCG00000014599,…	KCNJ2,TTPA,MYO1G,PFN2,SYT1,EXOC1,--,ANXA2,SYT7,LDLRAP1,--,AMER1,SNX21,SYT5,PFN1,FCHO2,--,TWF1,KCNJ1,PHLDA3,SYT9,SYTL2,VIL1,STXBP6,RAB35,FRMPD4,KRIT1,RS1,COMMD1,ALOX15,ACTN2
GO:0007219	0.0768103	1	56	64	Notch signaling pathway	BP	ENSSSCG00000002906,ENSSSCG00000015318,ENSSSCG00000022155,ENSSSCG00000027140,ENSSSCG00000015985,ENSSSCG00000009060,ENSSSCG00000002838,ENSSSCG00000002749,ENSSSCG00000016806,ENSSSCG00000026362,ENSSSCG00000007198,ENSSSCG00000000300,ENSSSCG00000001940,ENSSSCG00000027726,ENSSSCG00000007244,ENSSSCG00000027060,ENSSSCG00000000994,ENSSSCG00000005844,ENSSSCG00000012553,ENSSSCG00000004451,ENSSSCG00000004223,…	ETV2,--,RBPJ,CDKN1B,HOXD3,--,ZNF423,HP,CDH6,HES1,ANGPT4,NEUROD4,FOXA1,DLL1,POFUT1,TBX2,GMDS,NRARP,RIPPLY1,RIPPLY2,HEY2,CEBPA,HHEX,DLL4,HEY1,PSEN1,ONECUT1,S1PR3,MAML1,IL2RA,--,GRIP2,MIB1,PSEN2,NR1H4,--,--,JAG1,HEYL,KCNA5,TIMP4,IFT172,NOTCH4,IFT74,--,WDR12,--,HES7,NLE1,HNF1B,SOX9,JAG2,ATOH1,AGXT,DTX1,KRT19
GO:0001963	0.0768336	1	11	11	synaptic transmission, dopaminergic	BP	ENSSSCG00000006215,ENSSSCG00000015048,ENSSSCG00000014093,ENSSSCG00000024070,ENSSSCG00000009203,ENSSSCG00000008730,ENSSSCG00000024289,ENSSSCG00000029037,ENSSSCG00000010054,ENSSSCG00000029096,ENSSSCG00000003385	CRH,DRD2,CRHBP,CDK5,SNCA,DRD5,--,--,ADORA2A,HRH2,PARK7
GO:0001656	0.0771708	1	19	20	metanephros development	BP	ENSSSCG00000016878,ENSSSCG00000002831,ENSSSCG00000000363,ENSSSCG00000009083,ENSSSCG00000021332,ENSSSCG00000008606,ENSSSCG00000001770,ENSSSCG00000004895,ENSSSCG00000016698,ENSSSCG00000005045,ENSSSCG00000028216,ENSSSCG00000017692,ENSSSCG00000017748,ENSSSCG00000028297,ENSSSCG00000011046,ENSSSCG00000007501,ENSSSCG00000006073,ENSSSCG00000008446,ENSSSCG00000008645	FGF10,IRX3,GDF11,SPRY1,PAX8,--,CTSH,BCL2,HOXA11,BMP4,NKX3-1,LHX1,NF1,APH1A,ITGA8,BMP7,OSR2,SIX2,ID2
GO:0032588	0.0771811	1	11	11	trans-Golgi network membrane	CC	ENSSSCG00000009010,ENSSSCG00000021660,ENSSSCG00000002554,ENSSSCG00000006489,ENSSSCG00000023731,ENSSSCG00000015539,ENSSSCG00000001892,ENSSSCG00000002921,ENSSSCG00000004662,ENSSSCG00000001887,ENSSSCG00000009990	ARFIP1,--,PLD4,TMEM79,--,STX6,SCAMP2,CLIP3,SLC24A5,SCAMP5,CABP7
GO:0045653	0.0771947	1	4	4	negative regulation of megakaryocyte differentiation	BP	ENSSSCG00000021860,ENSSSCG00000029773,ENSSSCG00000001177,ENSSSCG00000001858	--,HIST1H4L,--,CIB1
GO:0043280	0.0773015	1	27	30	positive regulation of cysteine-type endopeptidase activity involved in apoptotic process	BP	ENSSSCG00000020672,ENSSSCG00000027757,ENSSSCG00000013033,ENSSSCG00000023357,ENSSSCG00000024275,ENSSSCG00000008893,ENSSSCG00000016678,ENSSSCG00000027044,ENSSSCG00000010235,ENSSSCG00000020906,ENSSSCG00000028216,ENSSSCG00000026454,ENSSSCG00000016714,ENSSSCG00000006940,ENSSSCG00000012772,ENSSSCG00000012252,ENSSSCG00000010079,ENSSSCG00000009327,ENSSSCG00000028562,ENSSSCG00000002860,ENSSSCG00000017811,…	F2R,FIS1,BAD,--,--,--,NOD1,SOX7,SIRT1,TNFSF10,NKX3-1,--,CYCS,CYR61,BCAP31,DDX3X,PPM1F,HMGB1,FOXL2,PDCD5,--,--,ARL6IP5,WNT3A,RHOA,TNF,--
GO:0046983	0.0777939	1	125	150	protein dimerization activity	MF	ENSSSCG00000004815,ENSSSCG00000009656,ENSSSCG00000010534,ENSSSCG00000026092,ENSSSCG00000015370,ENSSSCG00000028798,ENSSSCG00000015371,ENSSSCG00000024549,ENSSSCG00000023124,ENSSSCG00000006222,ENSSSCG00000016533,ENSSSCG00000027450,ENSSSCG00000007171,ENSSSCG00000010597,ENSSSCG00000008687,ENSSSCG00000009794,ENSSSCG00000023070,ENSSSCG00000011534,ENSSSCG00000026362,ENSSSCG00000007202,ENSSSCG00000016637,…	--,--,HPS1,SREBF2,TWIST1,--,FERD3L,--,--,BHLHE22,STRA8,--,EBF4,TAF5,MXD4,MLXIP,--,BHLHE40,HES1,TCF15,TFEC,MYOG,MYF6,SOHLH1,--,TFAP2A,NEUROD4,ID1,--,POLR1D,--,ATP6V1C2,NPAS1,NEUROD1,AHR,--,GPR139,HAND1,--,HEY2,SPECC1L,BTRC,MESP2,ZBED6,MXD3,MSGN1,HEY1,BHLHA
GO:0001750	0.0789945	1	31	34	photoreceptor outer segment	CC	ENSSSCG00000029523,ENSSSCG00000023719,ENSSSCG00000009093,ENSSSCG00000011590,ENSSSCG00000011881,ENSSSCG00000016974,ENSSSCG00000001924,ENSSSCG00000029279,ENSSSCG00000016580,ENSSSCG00000024725,ENSSSCG00000001042,ENSSSCG00000006134,ENSSSCG00000004612,ENSSSCG00000004620,ENSSSCG00000028713,ENSSSCG00000004622,ENSSSCG00000015406,ENSSSCG00000015578,ENSSSCG00000009919,ENSSSCG00000014876,ENSSSCG00000008020,…	--,IFT20,BBS7,RHO,IQCB1,MAP1B,BBS4,GNA11,OPN1SW,C2orf71,MAK,CNGB3,RAB27A,MYO5A,RP1L1,GNB5,GNAT3,PDC,HNF1A,MYO7A,IFT140,ARR3,PTGS1,--,CNGB1,ROM1,CIB2,GNAT1,GUCA1A,ABCA4,OCRL
GO:0007338	0.079691	1	28	32	single fertilization	BP	ENSSSCG00000020697,ENSSSCG00000025041,ENSSSCG00000010928,ENSSSCG00000021265,ENSSSCG00000015982,ENSSSCG00000026360,ENSSSCG00000011261,ENSSSCG00000000276,ENSSSCG00000022290,ENSSSCG00000000766,ENSSSCG00000011800,ENSSSCG00000014952,ENSSSCG00000002134,ENSSSCG00000016698,ENSSSCG00000012371,ENSSSCG00000003142,ENSSSCG00000009610,ENSSSCG00000004399,ENSSSCG00000028562,ENSSSCG00000003053,ENSSSCG00000015981,…	--,--,KDM5B,--,HOXD9,CLGN,WDR48,TARBP2,UMODL1,CECR2,FETUB,IZUMO1R,--,HOXA11,AR,IZUMO1,NPM2,SLC22A16,FOXL2,BSP1,HOXD10,HEXB,ADCY3,SPMI,--,PSP-II,--,--
GO:0031527	0.0802263	1	10	10	filopodium membrane	CC	ENSSSCG00000013424,ENSSSCG00000012912,ENSSSCG00000005012,ENSSSCG00000008340,ENSSSCG00000017578,ENSSSCG00000024302,ENSSSCG00000005110,ENSSSCG00000016027,ENSSSCG00000023004,ENSSSCG00000003271	--,TBC1D10C,ARF6,ANTXR1,ITGA3,GAP43,SYNE2,ITGAV,FZD9,TTYH1
GO:0009952	0.080615	1	65	75	anterior/posterior pattern specification	BP	ENSSSCG00000009004,ENSSSCG00000030553,ENSSSCG00000010095,ENSSSCG00000015982,ENSSSCG00000015983,ENSSSCG00000015984,ENSSSCG00000015985,ENSSSCG00000000363,ENSSSCG00000027615,ENSSSCG00000007202,ENSSSCG00000008727,ENSSSCG00000001477,ENSSSCG00000016569,ENSSSCG00000023765,ENSSSCG00000028322,ENSSSCG00000016011,ENSSSCG00000009317,ENSSSCG00000010671,ENSSSCG00000000279,ENSSSCG00000003971,ENSSSCG00000025578,…	SFRP2,CTNNBIP1,CRKL,HOXD9,HOXD8,HOXD4,HOXD3,GDF11,--,TCF15,MSX1,RING1,SMO,PCGF2,BTG2,NEUROD1,CDX2,EMX2,HOXC13,--,--,TSHZ1,HHEX,HOXC6,BARX1,CYP26C1,HOXC4,FOXH1,HOXA11,HOXA7,HOXA6,HOXA5,HOXA3,HOXA2,LHX1,PBX1,--,GRSF1,BMPR1A,SFRP1,SMAD2,HOXD13,BMPR2,WNT5A,HOXD10,GLI2,ZIC3,MLLT3,NR2F2,TULP3,RARG,HNF1B,OTX1,HOXB1,HOXB2,HOXB3,HOXB4,HOXB9,HOXB8,WNT3A,KIF3A,HOXB7,HOXB6,VANGL2,HOXB5
GO:0050900	0.0811492	1	20	21	leukocyte migration	BP	ENSSSCG00000014091,ENSSSCG00000006288,ENSSSCG00000010998,ENSSSCG00000015622,ENSSSCG00000016548,ENSSSCG00000005742,ENSSSCG00000016929,ENSSSCG00000015089,ENSSSCG00000021893,ENSSSCG00000012365,ENSSSCG00000007436,ENSSSCG00000024168,ENSSSCG00000017187,ENSSSCG00000013593,ENSSSCG00000010538,ENSSSCG00000000257,ENSSSCG00000013655,ENSSSCG00000029130,ENSSSCG00000015955,ENSSSCG00000001404	F2RL1,SELP,B4GALT1,CD34,PODXL,DBH,PDE4D,JAML,ROCK1,MSN,MMP9,AIMP1,FOXJ1,CCL25,NKX2-3,ITGB7,ICAM1,ELANE,ITGA6,TNF
GO:0031397	0.0819826	1	29	32	negative regulation of protein ubiquitination	BP	ENSSSCG00000024576,ENSSSCG00000024070,ENSSSCG00000000033,ENSSSCG00000016634,ENSSSCG00000002841,ENSSSCG00000011794,ENSSSCG00000014855,ENSSSCG00000000164,ENSSSCG00000004370,ENSSSCG00000003256,ENSSSCG00000009692,ENSSSCG00000001488,ENSSSCG00000015683,ENSSSCG00000011286,ENSSSCG00000028720,ENSSSCG00000005904,ENSSSCG00000004154,ENSSSCG00000004421,ENSSSCG00000004507,ENSSSCG00000023110,ENSSSCG00000006772,…	BAG5,CDK5,TSPO,CAV1,N4BP1,SENP2,RPS3,CRY1,ATG5,PRKCG,PINX1,GCLC,SPOPL,KLHL40,NXN,VPS28,TNFAIP3,FYN,SMAD7,UBXN1,SVBP,PRKCE,ARRB2,--,GNL3L,SOX4,ARRB1,USP4,PARK7
GO:0007267	0.082738	1	68	81	cell-cell signaling	BP	ENSSSCG00000016878,ENSSSCG00000011808,ENSSSCG00000025982,ENSSSCG00000010647,ENSSSCG00000016628,ENSSSCG00000008703,ENSSSCG00000021400,ENSSSCG00000021165,ENSSSCG00000008962,ENSSSCG00000021992,ENSSSCG00000001050,ENSSSCG00000027726,ENSSSCG00000025588,ENSSSCG00000023592,ENSSSCG00000015487,ENSSSCG00000022370,ENSSSCG00000000975,ENSSSCG00000029950,ENSSSCG00000014951,ENSSSCG00000017700,ENSSSCG00000015194,…	FGF10,SST,--,ADRB1,WNT2,ADRA2C,--,ADRB2,EREG,--,EDN1,DLL1,FJX1,TAC1,TNFSF18,TNFSF9,PANX2,CD70,PANX1,CCL3L1,--,BARX1,ADRA2B,BHLHA15,ADRA1A,GJA1,CCL5,TAC4,AIMP1,--,TRHDE,--,LNPEP,GJD2,GREM1,CXCL13,LHX1,CYR61,--,NPY,FGF9,NTF3,--,CCR1,OR11H7,ADRA2A,--,CCR5,TBX5,OR56A1,--,PYY,--,NOV,NTF4,WNT1,--,GJC2,--,STAB1,--,CTGF,IHH,WISP2,LHX5,CCL8,ADRA1D,ADRB3
GO:0019902	0.0829258	1	27	29	phosphatase binding	MF	ENSSSCG00000021684,ENSSSCG00000004952,ENSSSCG00000016545,ENSSSCG00000011940,ENSSSCG00000005761,ENSSSCG00000000753,ENSSSCG00000007289,ENSSSCG00000013081,ENSSSCG00000008038,ENSSSCG00000000164,ENSSSCG00000008423,ENSSSCG00000008040,ENSSSCG00000007652,ENSSSCG00000004793,ENSSSCG00000003913,ENSSSCG00000000131,ENSSSCG00000010031,ENSSSCG00000014909,ENSSSCG00000030485,ENSSSCG00000023273,ENSSSCG00000010081,…	MAPK3,SMAD3,CHCHD3,DZIP3,PPP1R26,WNK1,TRPC4AP,PPP1R32,SLC9A3R2,CRY1,PPP1R21,TSC2,PPP1R35,SPRED1,--,ELFN2,SFI1,SYTL2,ELFN1,SH3YL1,MAPK1,SMAD2,PPP1R36,--,SLC9A3R1,--,--
GO:0031647	0.0832939	1	36	41	regulation of protein stability	BP	ENSSSCG00000026239,ENSSSCG00000004923,ENSSSCG00000015052,ENSSSCG00000011551,ENSSSCG00000015384,ENSSSCG00000011001,ENSSSCG00000004546,ENSSSCG00000004563,ENSSSCG00000010440,ENSSSCG00000010727,ENSSSCG00000013774,ENSSSCG00000012551,ENSSSCG00000025545,ENSSSCG00000017414,ENSSSCG00000004895,ENSSSCG00000009692,ENSSSCG00000002956,ENSSSCG00000003520,ENSSSCG00000026969,ENSSSCG00000015002,ENSSSCG00000015779,…	VPS35,SLC51B,USP28,TADA3,TOMM7,APTX,SUMO1,--,PTEN,GPR26,--,RNF128,HDAC6,KAT2A,BCL2,PINX1,PSMD8,CDC42,KRAS,ELMOD1,CDKN2AIP,TERT,LRRC46,DPM3,RNF149,--,GNL3L,MUL1,SOX4,STUB1,HDAC3,CCAR2,USP4,DPM2,ASGR2,--
GO:0005783	0.0835744	1	424	514	endoplasmic reticulum	CC	ENSSSCG00000029652,ENSSSCG00000006282,ENSSSCG00000006214,ENSSSCG00000021547,ENSSSCG00000025281,ENSSSCG00000016406,ENSSSCG00000010096,ENSSSCG00000027973,ENSSSCG00000026781,ENSSSCG00000016599,ENSSSCG00000022409,ENSSSCG00000026092,ENSSSCG00000027526,ENSSSCG00000015050,ENSSSCG00000016420,ENSSSCG00000002050,ENSSSCG00000000038,ENSSSCG00000002828,ENSSSCG00000022092,ENSSSCG00000009388,ENSSSCG00000008844,…	TMBIM6,KIFAP3,RRS1,--,ARL6IP1,ESYT2,AIFM3,--,--,GPR37,DNASE1L1,SREBF2,MAN1B1,ZW10,INSIG1,DAD1,CYB5R3,LPCAT2,--,KCNRG,KDR,SSR1,VMA21,CREB3L2,--,PSMG1,PLD4,PGS1,TOR1B,TOR1A,CPED1,SRD5A3,P3H2,HTT,FAM20A,TMEM129,ARSG,CLGN,--,SLC35B4,NSDHL,SUMF1,ITGA5,LRPAP1,HMOX1,ERLIN1,CLN6,SERP1,SAR1B,--,PRKCA,KDELR2,CAV1,SELT,--,P3H1,EBP,CAMLG,--,--,FA2H,SRP72,ORMDL2,PORCN,FMO3,--,--,P2RY13,--,GPR85,TOR3A,TBC1D20,…
GO:0019432	0.0838533	1	12	12	triglyceride biosynthetic process	BP	ENSSSCG00000022763,ENSSSCG00000027266,ENSSSCG00000005829,ENSSSCG00000001435,ENSSSCG00000008121,ENSSSCG00000005918,ENSSSCG00000014861,ENSSSCG00000009233,ENSSSCG00000007019,ENSSSCG00000010631,ENSSSCG00000007359,ENSSSCG00000008624	--,PNPLA3,AGPAT2,AGPAT1,GPAT2,DGAT1,MOGAT2,GPAT3,GPAT4,GPAM,LPIN3,--
GO:0030742	0.0840697	1	13	13	GTP-dependent protein binding	MF	ENSSSCG00000029828,ENSSSCG00000016928,ENSSSCG00000028968,ENSSSCG00000004117,ENSSSCG00000010573,ENSSSCG00000013623,ENSSSCG00000027443,ENSSSCG00000003520,ENSSSCG00000013897,ENSSSCG00000002740,ENSSSCG00000000912,ENSSSCG00000021036,ENSSSCG00000014923	RAB5B,RAB3C,RAC1,RAB32,HPS6,RAB3D,MRAS,CDC42,RAB3A,AP1G1,EEA1,RAB3B,RAB38
GO:0006401	0.0859564	1	10	10	RNA catabolic process	BP	ENSSSCG00000024385,ENSSSCG00000016911,ENSSSCG00000010251,ENSSSCG00000004024,ENSSSCG00000001424,ENSSSCG00000024867,ENSSSCG00000003015,ENSSSCG00000013737,ENSSSCG00000012979,ENSSSCG00000009881	RNASEH2B,SKIV2L2,SUPV3L1,--,SKIV2L,ISG20,--,RNASEH2A,RNASEH2C,OAS2
GO:0009954	0.0861966	1	18	19	proximal/distal pattern formation	BP	ENSSSCG00000029407,ENSSSCG00000025592,ENSSSCG00000015982,ENSSSCG00000027615,ENSSSCG00000027726,ENSSSCG00000025578,ENSSSCG00000008311,ENSSSCG00000015715,ENSSSCG00000016698,ENSSSCG00000013248,ENSSSCG00000004808,ENSSSCG00000006331,ENSSSCG00000004825,ENSSSCG00000001438,ENSSSCG00000015981,ENSSSCG00000015733,ENSSSCG00000015953,ENSSSCG00000015954	SP8,TP63,HOXD9,--,DLL1,--,CYP26B1,EN1,HOXA11,LRP4,GREM1,PBX1,CHSY1,PBX2,HOXD10,GLI2,DLX1,DLX2
GO:0002042	0.0862036	1	11	11	cell migration involved in sprouting angiogenesis	BP	ENSSSCG00000009535,ENSSSCG00000011101,ENSSSCG00000023395,ENSSSCG00000008749,ENSSSCG00000011102,ENSSSCG00000004808,ENSSSCG00000001695,ENSSSCG00000001661,ENSSSCG00000009630,ENSSSCG00000001089,ENSSSCG00000007675	EFNB2,ITGB1,TDGF1,SLIT2,NRP1,GREM1,--,SRF,EGR3,GPLD1,EPHB4
GO:0036513	0.0866254	1	9	9	Derlin-1 retrotranslocation complex	CC	ENSSSCG00000002822,ENSSSCG00000007228,ENSSSCG00000010024,ENSSSCG00000001436,ENSSSCG00000022838,ENSSSCG00000002414,ENSSSCG00000021004,ENSSSCG00000004826,ENSSSCG00000027057	--,HM13,RNF185,RNF5,SVIP,--,DERL1,VIMP,SYVN1
GO:0030133	0.0867252	1	22	24	transport vesicle	CC	ENSSSCG00000030827,ENSSSCG00000029615,ENSSSCG00000026619,ENSSSCG00000016635,ENSSSCG00000012766,ENSSSCG00000016643,ENSSSCG00000007210,ENSSSCG00000028506,ENSSSCG00000002669,ENSSSCG00000013634,ENSSSCG00000009128,ENSSSCG00000013275,ENSSSCG00000025531,ENSSSCG00000014047,ENSSSCG00000002015,ENSSSCG00000024936,ENSSSCG00000010882,ENSSSCG00000002859,ENSSSCG00000011195,ENSSSCG00000012794,ENSSSCG00000021696,…	--,VAMP7,BLOC1S5,CAV2,BGN,TMEM168,NRSN2,YIPF1,CRISPLD2,YIPF2,AP1AR,SYT13,SSPN,FGFR4,--,C1QTNF5,--,ANKRD27,GALNT15,TMEM187,NRSN1,YIPF3
GO:1903955	0.0869607	1	46	52	positive regulation of protein targeting to mitochondrion	BP	ENSSSCG00000026092,ENSSSCG00000010929,ENSSSCG00000007973,ENSSSCG00000014095,ENSSSCG00000014430,ENSSSCG00000025893,ENSSSCG00000020879,ENSSSCG00000015384,ENSSSCG00000016551,ENSSSCG00000030430,ENSSSCG00000026362,ENSSSCG00000015524,ENSSSCG00000024418,ENSSSCG00000010727,ENSSSCG00000010327,ENSSSCG00000029991,ENSSSCG00000003111,ENSSSCG00000017165,ENSSSCG00000017414,ENSSSCG00000023331,ENSSSCG00000010138,…	SREBF2,CYB5R1,IL9R,ZBED3,ABLIM3,ZBTB17,--,TOMM7,TSGA13,RPL28,HES1,FAM20B,RHOU,GPR26,POLR3A,SNIP1,SAE1,USP36,KAT2A,UBL5,ZDHHC8,CSNK2A2,UBE2J2,MYBPC1,CTSK,PSMD8,MICALL2,--,GPHA2,RAC3,PEMT,ARIH2,STARD7,ACTL6A,ELMOD1,FZD5,ATG13,BAP1,LRRC46,WDR75,HPS4,PINK1,PSMB7,WBP11,HHAT,WDR46
GO:0001824	0.0873276	1	18	19	blastocyst development	BP	ENSSSCG00000002906,ENSSSCG00000002050,ENSSSCG00000009346,ENSSSCG00000009317,ENSSSCG00000017070,ENSSSCG00000013582,ENSSSCG00000000867,ENSSSCG00000000552,ENSSSCG00000013239,ENSSSCG00000009919,ENSSSCG00000029411,ENSSSCG00000010922,ENSSSCG00000001393,ENSSSCG00000015604,ENSSSCG00000003352,ENSSSCG00000026812,ENSSSCG00000010070,ENSSSCG00000014288	ETV2,DAD1,--,CDX2,HAND1,XAB2,--,MED21,PSMC3,HNF1A,CAPN2,ELF3,POU5F1,NEK2,--,EMG1,SMARCB1,GDF9
GO:0031529	0.0875715	1	11	11	ruffle organization	BP	ENSSSCG00000014441,ENSSSCG00000028968,ENSSSCG00000005012,ENSSSCG00000022766,ENSSSCG00000010965,ENSSSCG00000001100,ENSSSCG00000014624,ENSSSCG00000008348,ENSSSCG00000010702,ENSSSCG00000003413,ENSSSCG00000012920	--,RAC1,ARF6,--,CCL21,CARMIL1,ARFIP2,--,PLEKHA1,MTOR,CORO1B
GO:0060071	0.0880337	1	12	12	Wnt signaling pathway, planar cell polarity pathway	BP	ENSSSCG00000021398,ENSSSCG00000025374,ENSSSCG00000028968,ENSSSCG00000012396,ENSSSCG00000009971,ENSSSCG00000025689,ENSSSCG00000025822,ENSSSCG00000029852,ENSSSCG00000003342,ENSSSCG00000006052,ENSSSCG00000009593,ENSSSCG00000006383	WNT9B,DVL3,RAC1,MED12,ZNRF3,--,SFRP1,WNT5A,DVL1,FZD6,ROR2,VANGL2
GO:0001817	0.0881913	1	12	12	regulation of cytokine production	BP	ENSSSCG00000030072,ENSSSCG00000029511,ENSSSCG00000002525,ENSSSCG00000009440,ENSSSCG00000001900,ENSSSCG00000021576,ENSSSCG00000010522,ENSSSCG00000014216,ENSSSCG00000006369,ENSSSCG00000029879,ENSSSCG00000006250,ENSSSCG00000024982	IQGAP1,UBASH3A,TRAF3,ELF1,CSK,CD83,ANKRD2,TICAM2,F11R,LTF,LYN,LITAF
GO:0031201	0.0886065	1	45	53	SNARE complex	CC	ENSSSCG00000029045,ENSSSCG00000010094,ENSSSCG00000028008,ENSSSCG00000029481,ENSSSCG00000002295,ENSSSCG00000029615,ENSSSCG00000025798,ENSSSCG00000025562,ENSSSCG00000025170,ENSSSCG00000025991,ENSSSCG00000016750,ENSSSCG00000015482,ENSSSCG00000004727,ENSSSCG00000026293,ENSSSCG00000020653,ENSSSCG00000015539,ENSSSCG00000007768,ENSSSCG00000004125,ENSSSCG00000029262,ENSSSCG00000011282,ENSSSCG00000016985,…	--,SNAP29,VAMP3,CPLX1,VTI1B,VAMP7,--,--,--,--,YKT6,VAMP4,SNAP23,STX5,--,STX6,STX4,STX11,GOSR1,SEC22C,BNIP1,STX17,STX1B,--,VAMP1,NAPA,SNAP25,SYN2,STX3,--,STX12,STX10,--,--,--,STX7,STXBP2,SCAMP5,--,--,VAMP8,STX1A,STX2,SNAP47,NAPB
GO:0030111	0.0888637	1	17	18	regulation of Wnt signaling pathway	BP	ENSSSCG00000009004,ENSSSCG00000024171,ENSSSCG00000010428,ENSSSCG00000026889,ENSSSCG00000001620,ENSSSCG00000009148,ENSSSCG00000004014,ENSSSCG00000004385,ENSSSCG00000017578,ENSSSCG00000017866,ENSSSCG00000009919,ENSSSCG00000022280,ENSSSCG00000013429,ENSSSCG00000002658,ENSSSCG00000022417,ENSSSCG00000001085,ENSSSCG00000006383	SFRP2,--,DKK1,TMEM237,MDFI,LEF1,DACT2,SNX3,ITGA3,--,HNF1A,DACT3,STK11,FOXL1,HNF1B,DCDC2,VANGL2
GO:0006913	0.0890929	1	60	68	nucleocytoplasmic transport	BP	ENSSSCG00000029828,ENSSSCG00000025041,ENSSSCG00000000268,ENSSSCG00000011550,ENSSSCG00000021148,ENSSSCG00000025890,ENSSSCG00000029544,ENSSSCG00000030014,ENSSSCG00000010192,ENSSSCG00000016928,ENSSSCG00000006498,ENSSSCG00000009807,ENSSSCG00000017769,ENSSSCG00000010048,ENSSSCG00000013848,ENSSSCG00000004117,ENSSSCG00000017795,ENSSSCG00000017412,ENSSSCG00000008042,ENSSSCG00000004612,ENSSSCG00000000511,…	RAB5B,--,AAAS,CAMK1,--,RAB9B,RAB2B,--,RAB4A,RAB3C,RAB25,RHOF,--,RAB36,RAB8A,RAB32,NSRP1,RAB5C,--,RAB27A,RAB21,MYBBP1A,RALA,ANKRD54,RIT1,NPM1,RAB23,RGS14,--,RAB3D,NUP155,MRAS,--,RAC3,KRAS,RAB29,RRAS,RASD1,RAB7B,RAB3A,--,--,RAB35,RAB39A,RAB11A,RAB37,RAB22A,RAB3B,RAB10,RAB14,RAB38,--,RAB9A,--,RALB,RAB13,RAB39B,DNAJC27,RAB24,RAB18
GO:0050661	0.0900037	1	20	21	NADP binding	MF	ENSSSCG00000002888,ENSSSCG00000017755,ENSSSCG00000016877,ENSSSCG00000016450,ENSSSCG00000023472,ENSSSCG00000007849,ENSSSCG00000014125,ENSSSCG00000022759,ENSSSCG00000015267,ENSSSCG00000015268,ENSSSCG00000015266,ENSSSCG00000005859,ENSSSCG00000006702,ENSSSCG00000009856,ENSSSCG00000003402,ENSSSCG00000015844,ENSSSCG00000013302,ENSSSCG00000025108,ENSSSCG00000006320,ENSSSCG00000014080	GAPDHS,NOS2,NNT,NOS3,FMO3,CRYM,DHFR,--,FMO2,FMO1,FMO4,--,FMO5,NOS1,PGD,GSR,CAT,G6PD,--,HMGCR
GO:0090263	0.0900808	1	42	47	positive regulation of canonical Wnt signaling pathway	BP	ENSSSCG00000009004,ENSSSCG00000026239,ENSSSCG00000003795,ENSSSCG00000016878,ENSSSCG00000014095,ENSSSCG00000000625,ENSSSCG00000016628,ENSSSCG00000016634,ENSSSCG00000009086,ENSSSCG00000007197,ENSSSCG00000010465,ENSSSCG00000004217,ENSSSCG00000005844,ENSSSCG00000023272,ENSSSCG00000007864,ENSSSCG00000012361,ENSSSCG00000000784,ENSSSCG00000009153,ENSSSCG00000011014,ENSSSCG00000025689,ENSSSCG00000021647,…	SFRP2,VPS35,WLS,FGF10,ZBED3,LRP6,WNT2,CAV1,--,RSPO4,TNKS2,RNF146,NRARP,ILK,GPRC5B,AMER1,LRRK2,DKK2,BAMBI,--,EDA,FGF9,RSPO2,SRC,SFRP1,WNT7A,DIXDC1,CSNK1E,DVL1,WNT10B,CSNK1D,TNKS,WNT1,NLE1,SOX4,WNT2B,YAP1,ASPM,ROR2,CCAR2,WNT3A,TMEM198
GO:0009636	0.090827	1	28	31	response to toxic substance	BP	ENSSSCG00000015048,ENSSSCG00000010448,ENSSSCG00000006225,ENSSSCG00000010391,ENSSSCG00000025500,ENSSSCG00000029515,ENSSSCG00000015331,ENSSSCG00000005269,ENSSSCG00000027073,ENSSSCG00000017797,ENSSSCG00000025545,ENSSSCG00000010853,ENSSSCG00000022372,ENSSSCG00000017698,ENSSSCG00000017700,ENSSSCG00000005368,ENSSSCG00000029516,ENSSSCG00000017705,ENSSSCG00000017420,ENSSSCG00000004895,ENSSSCG00000010357,…	DRD2,FAS,TTPA,ERCC6,HTR1D,PON3,--,TRPM6,--,SLC6A4,HDAC6,EPHX1,SLC6A14,CCL4,CCL3L1,XPA,SLC22A8,CCL5,CNP,BCL2,WAPL,SCN9A,AQP10,SLC23A1,CYP1A1,GJC2,BAX,CYP2F1
GO:0016814	0.0909366	1	7	7	hydrolase activity, acting on carbon-nitrogen (but not peptide) bonds, in cyclic amidines	MF	ENSSSCG00000024365,ENSSSCG00000000091,ENSSSCG00000015561,ENSSSCG00000000667,ENSSSCG00000000668,ENSSSCG00000026127,ENSSSCG00000026725	--,APOBEC3H,APOBEC4,AICDA,APOBEC1,--,--
GO:0005549	0.0918905	1	189	241	odorant binding	MF	ENSSSCG00000013132,ENSSSCG00000024360,ENSSSCG00000021797,ENSSSCG00000013139,ENSSSCG00000025636,ENSSSCG00000027837,ENSSSCG00000013138,ENSSSCG00000022662,ENSSSCG00000025985,ENSSSCG00000013157,ENSSSCG00000029510,ENSSSCG00000024744,ENSSSCG00000030613,ENSSSCG00000022184,ENSSSCG00000026361,ENSSSCG00000026611,ENSSSCG00000013160,ENSSSCG00000013162,ENSSSCG00000014455,ENSSSCG00000014457,ENSSSCG00000014458,…	OR5A2,--,--,--,--,--,--,--,--,OR5B21,OR5B12,--,--,--,OR5B3,OR5B17,--,OR5B2,--,OR5D13,OR5D18,OR5D16,--,--,--,--,--,OR5I1,--,--,--,OR5AS1,--,--,--,--,--,--,--,--,--,--,OR5J2,--,--,--,--,--,--,--,--,--,--,--,--,OR5M11,--,--,--,--,--,--,--,--,--,--,--,--,--,--,--,--,--,--,OR10Q1,--,--,--,OR5AU1,--,--,--,--,--,OR9Q2,--,OR9Q1,--,--,--,--,--,OR6Q1,--,--,OR8B4,OR8B8,--,--,--,--,--,--,--,--,--,--,--,--,--…
GO:0001676	0.092007	1	10	10	long-chain fatty acid metabolic process	BP	ENSSSCG00000015784,ENSSSCG00000002349,ENSSSCG00000013879,ENSSSCG00000001760,ENSSSCG00000012881,ENSSSCG00000024902,ENSSSCG00000021022,ENSSSCG00000014257,ENSSSCG00000006569,ENSSSCG00000005648	ACSL1,ACOT4,SLC27A1,ACSBG1,--,--,--,SLC27A6,SLC27A3,--
GO:0031996	0.0921194	1	10	10	thioesterase binding	MF	ENSSSCG00000012767,ENSSSCG00000005838,ENSSSCG00000028968,ENSSSCG00000005012,ENSSSCG00000002525,ENSSSCG00000025768,ENSSSCG00000008433,ENSSSCG00000003520,ENSSSCG00000010629,ENSSSCG00000013291	HAUS7,TRAF2,RAC1,ARF6,TRAF3,CALM1,--,CDC42,ADRA2A,TRAF6
GO:0042989	0.0922953	1	8	9	sequestering of actin monomers	BP	ENSSSCG00000015353,ENSSSCG00000012517,ENSSSCG00000008585,ENSSSCG00000008245,ENSSSCG00000000798,ENSSSCG00000012120,ENSSSCG00000012119,ENSSSCG00000028695	SCIN,--,PFN4,TMSB10,TWF1,--,--,--
GO:0043433	0.0932014	1	37	41	negative regulation of sequence-specific DNA binding transcription factor activity	BP	ENSSSCG00000030553,ENSSSCG00000015370,ENSSSCG00000010172,ENSSSCG00000004546,ENSSSCG00000011534,ENSSSCG00000027312,ENSSSCG00000007227,ENSSSCG00000022482,ENSSSCG00000015568,ENSSSCG00000017070,ENSSSCG00000002867,ENSSSCG00000007039,ENSSSCG00000012300,ENSSSCG00000023653,ENSSSCG00000010235,ENSSSCG00000001573,ENSSSCG00000005437,ENSSSCG00000023667,ENSSSCG00000013640,ENSSSCG00000003405,ENSSSCG00000004507,…	CTNNBIP1,TWIST1,EGLN1,SUMO1,BHLHE40,PTCH1,ID1,DDIT3,RNF2,HAND1,CEBPG,PRNP,FOXP3,GLIS2,SIRT1,PIM1,KLF4,--,--,PEX14,SMAD7,SFRP5,MEN1,HAND2,WWP2,MAP3K10,GAS6,ID2,EZH2,TCF7L2,FZD6,TRIB1,PHB2,HDAC4,KDM1A,FOXA2,TAF3
GO:0001508	0.0932246	1	10	10	action potential	BP	ENSSSCG00000005285,ENSSSCG00000016621,ENSSSCG00000029279,ENSSSCG00000006545,ENSSSCG00000017078,ENSSSCG00000004805,ENSSSCG00000001753,ENSSSCG00000007462,ENSSSCG00000029240,ENSSSCG00000017562	--,--,GNA11,CHRNB2,GLRA1,GJD2,CHRNB4,KCNB1,--,CACNA1G
GO:0070207	0.0936529	1	7	7	protein homotrimerization	BP	ENSSSCG00000010552,ENSSSCG00000003386,ENSSSCG00000005838,ENSSSCG00000011565,ENSSSCG00000010067,ENSSSCG00000009672,ENSSSCG00000002792	PKD2L1,TNFRSF9,TRAF2,BRK1,MIF,SCARA5,HSF4
GO:0008083	0.0938076	1	92	114	growth factor activity	MF	ENSSSCG00000006815,ENSSSCG00000011460,ENSSSCG00000016878,ENSSSCG00000009527,ENSSSCG00000027572,ENSSSCG00000016522,ENSSSCG00000016523,ENSSSCG00000028709,ENSSSCG00000000363,ENSSSCG00000001027,ENSSSCG00000009996,ENSSSCG00000024954,ENSSSCG00000021400,ENSSSCG00000029252,ENSSSCG00000009997,ENSSSCG00000009086,ENSSSCG00000024960,ENSSSCG00000008956,ENSSSCG00000008962,ENSSSCG00000008963,ENSSSCG00000029429,…	--,--,FGF10,FGF14,CNTF,--,--,--,GDF11,BMP6,LIF,FGF1,--,FGF12,OSM,--,PDGFC,PPBP,EREG,AREG,LEFTY2,ANGPTL3,--,PPBP,BMP3,TDGF1,FGF5,--,FGF16,TGFB3,GDF5,PSPN,INHBA,--,PDGFA,--,VEGFB,--,--,FGF18,IL12B,FGF3,FGF4,BMP4,GDF7,--,FGF19,NRTN,TGFB1,--,--,--,--,--,VEGFC
GO:0005764	0.0938342	1	119	139	lysosome	CC	ENSSSCG00000022732,ENSSSCG00000017816,ENSSSCG00000025410,ENSSSCG00000027146,ENSSSCG00000012746,ENSSSCG00000028512,ENSSSCG00000015351,ENSSSCG00000017261,ENSSSCG00000007167,ENSSSCG00000009075,ENSSSCG00000026097,ENSSSCG00000025890,ENSSSCG00000008867,ENSSSCG00000030343,ENSSSCG00000008714,ENSSSCG00000011171,ENSSSCG00000011997,ENSSSCG00000022494,ENSSSCG00000026922,ENSSSCG00000029800,ENSSSCG00000010403,…	--,RILP,PRSS16,GLA,VMA21,LDLR,TMEM106B,ARSG,VPS16,MFSD8,LAMP3,RAB9B,CTSO,SLC38A9,PSAPL1,--,CHMP2B,TMEM59,DRAM2,--,MARCH8,USP5,LAMTOR1,--,RAB7A,--,NAAA,PRDX6,ACE,SYT7,MLC1,PSAP,VPS18,LAMP1,LAMTOR4,LRRK2,RAB27A,SLA-DRA,RRAGA,AP5M1,TMEM175,SCARB2,HEXA,ZC3HAV
GO:0044130	0.0942538	1	10	10	negative regulation of growth of symbiont in host	BP	ENSSSCG00000000481,ENSSSCG00000014016,ENSSSCG00000017044,ENSSSCG00000017637,ENSSSCG00000028758,ENSSSCG00000024252,ENSSSCG00000015652,ENSSSCG00000029130,ENSSSCG00000001404,ENSSSCG00000001403	IFNG,SQSTM1,IL12B,MPO,LBP,MBL1,IL10,ELANE,TNF,LTA
GO:0048665	0.0946833	1	10	10	neuron fate specification	BP	ENSSSCG00000008840,ENSSSCG00000016883,ENSSSCG00000001940,ENSSSCG00000027726,ENSSSCG00000025334,ENSSSCG00000030552,ENSSSCG00000005087,ENSSSCG00000016999,ENSSSCG00000001420,ENSSSCG00000023580	GSX2,ISL1,FOXA1,DLL1,POU4F1,DMRTA2,SIX1,TLX3,EHMT2,NKX2-2
GO:0051290	0.0949746	1	9	10	protein heterotetramerization	BP	ENSSSCG00000021860,ENSSSCG00000029773,ENSSSCG00000001177,ENSSSCG00000027435,ENSSSCG00000000059,ENSSSCG00000004578,ENSSSCG00000014791,ENSSSCG00000028829,ENSSSCG00000006612	--,HIST1H4L,--,HIST1H3E,XRCC6,ANXA2,RRM1,HIST1H3E,S100A10
GO:0016234	0.0949978	1	11	11	inclusion body	CC	ENSSSCG00000024576,ENSSSCG00000009203,ENSSSCG00000025545,ENSSSCG00000006872,ENSSSCG00000014016,ENSSSCG00000000784,ENSSSCG00000009230,ENSSSCG00000017427,ENSSSCG00000024305,ENSSSCG00000014053,ENSSSCG00000003154	BAG5,SNCA,HDAC6,--,SQSTM1,LRRK2,WDFY3,HAP1,MT3,SNCB,GYS1
GO:0048278	0.0954089	1	17	18	vesicle docking	BP	ENSSSCG00000016635,ENSSSCG00000025170,ENSSSCG00000026293,ENSSSCG00000020653,ENSSSCG00000007768,ENSSSCG00000004366,ENSSSCG00000004125,ENSSSCG00000005066,ENSSSCG00000005386,ENSSSCG00000007772,ENSSSCG00000013119,ENSSSCG00000024927,ENSSSCG00000024563,ENSSSCG00000004190,ENSSSCG00000002801,ENSSSCG00000007714,ENSSSCG00000009747	CAV2,--,STX5,--,STX4,BVES,STX11,EXOC5,STX17,STX1B,STX3,STX12,CEP83,STX7,NDRG4,STX1A,STX2
GO:0030285	0.0956031	1	9	9	integral component of synaptic vesicle membrane	CC	ENSSSCG00000021113,ENSSSCG00000012292,ENSSSCG00000028922,ENSSSCG00000006829,ENSSSCG00000001401,ENSSSCG00000015700,ENSSSCG00000027617,ENSSSCG00000015434,ENSSSCG00000000897	CACFD1,SYP,GABRA2,SYPL2,ATP6V1G2,--,SYNPR,--,--
GO:0008227	0.0960658	1	10	10	G-protein coupled amine receptor activity	MF	ENSSSCG00000028305,ENSSSCG00000008730,ENSSSCG00000024289,ENSSSCG00000029037,ENSSSCG00000006302,ENSSSCG00000015501,ENSSSCG00000012851,ENSSSCG00000011911,ENSSSCG00000004182,ENSSSCG00000005581	--,DRD5,--,--,GPR161,GPR52,DRD4,--,TAAR1,GPR21
GO:0030837	0.0964527	1	11	11	negative regulation of actin filament polymerization	BP	ENSSSCG00000030260,ENSSSCG00000001924,ENSSSCG00000008749,ENSSSCG00000006201,ENSSSCG00000017905,ENSSSCG00000011429,ENSSSCG00000023503,ENSSSCG00000000798,ENSSSCG00000007064,ENSSSCG00000011435,ENSSSCG00000027935	PFN2,BBS4,SLIT2,ARFGEF1,PFN1,--,PRKCD,TWF1,MKKS,--,FHOD3
GO:0006836	0.0964533	1	27	30	neurotransmitter transport	BP	ENSSSCG00000028099,ENSSSCG00000030370,ENSSSCG00000002827,ENSSSCG00000014444,ENSSSCG00000029481,ENSSSCG00000014447,ENSSSCG00000000936,ENSSSCG00000000749,ENSSSCG00000030076,ENSSSCG00000017797,ENSSSCG00000028922,ENSSSCG00000022372,ENSSSCG00000013346,ENSSSCG00000004041,ENSSSCG00000028643,ENSSSCG00000028917,ENSSSCG00000011577,ENSSSCG00000011600,ENSSSCG00000021262,ENSSSCG00000006811,ENSSSCG00000001895,…	--,--,SLC6A2,--,CPLX1,SLC6A7,SLC6A15,SLC6A12,SLC6A13,SLC6A4,GABRA2,SLC6A14,SLC6A5,--,--,--,SLC6A1,--,--,--,CPLX3,CPLX4,--,--,SLC6A3,SLC6A18,SLC6A19
GO:0007616	0.0969688	1	12	12	long-term memory	BP	ENSSSCG00000006125,ENSSSCG00000023497,ENSSSCG00000007049,ENSSSCG00000017865,ENSSSCG00000014039,ENSSSCG00000016726,ENSSSCG00000030073,ENSSSCG00000003215,ENSSSCG00000003160,ENSSSCG00000012796,ENSSSCG00000015426,ENSSSCG00000003170	CALB1,--,LRRN4,CTNS,RGS14,ADCY1,--,SHANK1,NTF4,MECP2,RELN,SLC17A7
GO:0001655	0.0970649	1	11	11	urogenital system development	BP	ENSSSCG00000021932,ENSSSCG00000026516,ENSSSCG00000021332,ENSSSCG00000029590,ENSSSCG00000008606,ENSSSCG00000011618,ENSSSCG00000028216,ENSSSCG00000017692,ENSSSCG00000006331,ENSSSCG00000010486,ENSSSCG00000003527	FOXB1,EPHB3,PAX8,ACD,--,GATA2,NKX3-1,LHX1,PBX1,HELLS,EPHB2
GO:0017144	0.0970685	1	12	12	drug metabolic process	BP	ENSSSCG00000023472,ENSSSCG00000022759,ENSSSCG00000015267,ENSSSCG00000015268,ENSSSCG00000015266,ENSSSCG00000003006,ENSSSCG00000006702,ENSSSCG00000001901,ENSSSCG00000020706,ENSSSCG00000010780,ENSSSCG00000001906,ENSSSCG00000006320	FMO3,--,FMO2,FMO1,FMO4,CYP2B6,FMO5,CYP1A2,--,CYP2E1,CYP1A1,--
GO:0051262	0.0976226	1	19	20	protein tetramerization	BP	ENSSSCG00000025592,ENSSSCG00000026025,ENSSSCG00000016470,ENSSSCG00000000490,ENSSSCG00000030303,ENSSSCG00000004454,ENSSSCG00000003214,ENSSSCG00000013083,ENSSSCG00000017705,ENSSSCG00000014970,ENSSSCG00000007738,ENSSSCG00000013302,ENSSSCG00000017950,ENSSSCG00000013374,ENSSSCG00000003361,ENSSSCG00000010542,ENSSSCG00000008143,ENSSSCG00000014080,ENSSSCG00000005641	TP63,HMGCL,--,--,ACHE,ME1,KCNC3,CPSF7,CCL5,MTMR2,ASL,CAT,TP53,KCNC1,--,CUTC,UXS1,HMGCR,--
GO:0008599	0.0976904	1	11	11	protein phosphatase type 1 regulator activity	MF	ENSSSCG00000007187,ENSSSCG00000001052,ENSSSCG00000026283,ENSSSCG00000005901,ENSSSCG00000027532,ENSSSCG00000006239,ENSSSCG00000007350,ENSSSCG00000027913,ENSSSCG00000021634,ENSSSCG00000007528,ENSSSCG00000000611	NSFL1C,PHACTR1,UBXN2A,PPP1R16A,PHACTR4,--,PPP1R16B,--,PPP1R8,PHACTR3,WBP11
GO:0007173	0.0980133	1	23	25	epidermal growth factor receptor signaling pathway	BP	ENSSSCG00000009048,ENSSSCG00000005706,ENSSSCG00000014306,ENSSSCG00000030072,ENSSSCG00000024674,ENSSSCG00000008962,ENSSSCG00000008963,ENSSSCG00000030289,ENSSSCG00000001483,ENSSSCG00000005986,ENSSSCG00000009664,ENSSSCG00000003017,ENSSSCG00000008437,ENSSSCG00000016196,ENSSSCG00000007334,ENSSSCG00000003731,ENSSSCG00000007807,ENSSSCG00000008397,ENSSSCG00000007356,ENSSSCG00000008326,ENSSSCG00000017251,…	GAB1,ABL1,CAMLG,IQGAP1,ABL2,EREG,AREG,PTPN11,FAM83B,FAM83A,PTK2B,TGFB1,SOCS5,VIL1,SRC,--,CD19,EFEMP1,PLCG1,TGFA,SOX9,HBEGF,SHC1
GO:0030507	0.0980325	1	13	13	spectrin binding	MF	ENSSSCG00000008692,ENSSSCG00000005753,ENSSSCG00000015335,ENSSSCG00000004736,ENSSSCG00000009125,ENSSSCG00000014876,ENSSSCG00000009613,ENSSSCG00000007022,ENSSSCG00000017223,ENSSSCG00000020736,ENSSSCG00000013377,ENSSSCG00000015425,ENSSSCG00000016218	ADD1,CAMSAP1,DYNC1I1,SPTBN5,ANK2,MYO7A,DMTN,ANK1,USH1G,ADD2,USH1C,SLC26A5,PTPRN
GO:0000976	0.0987447	1	31	34	transcription regulatory region sequence-specific DNA binding	MF	ENSSSCG00000000289,ENSSSCG00000015987,ENSSSCG00000024975,ENSSSCG00000021920,ENSSSCG00000001036,ENSSSCG00000008649,ENSSSCG00000028345,ENSSSCG00000022482,ENSSSCG00000009101,ENSSSCG00000008221,ENSSSCG00000004772,ENSSSCG00000009569,ENSSSCG00000014336,ENSSSCG00000001880,ENSSSCG00000023245,ENSSSCG00000009131,ENSSSCG00000028216,ENSSSCG00000022383,ENSSSCG00000026460,ENSSSCG00000017480,ENSSSCG00000017187,…	NFE2,NFE2L2,--,SOX12,TFAP2A,SOX11,--,DDIT3,PRDM5,KDM3A,BAHD1,PSPC1,EGR1,SIN3A,NONO,PITX2,NKX3-1,GATA4,TAL1,THRA,FOXJ1,MKL1,ATF3,TBX15,CREB3L3,PER1,SOX4,SOX9,BAHCC1,GATA3,CRY2
GO:0031274	0.0988044	1	9	9	positive regulation of pseudopodium assembly	BP	ENSSSCG00000014091,ENSSSCG00000004763,ENSSSCG00000010965,ENSSSCG00000026108,ENSSSCG00000021359,ENSSSCG00000003520,ENSSSCG00000008490,ENSSSCG00000012996,ENSSSCG00000017245	F2RL1,C15orf62,CCL21,CDC42EP1,--,CDC42,--,CDC42EP2,CDC42EP4
GO:0018024	0.0996884	1	21	22	histone-lysine N-methyltransferase activity	MF	ENSSSCG00000002895,ENSSSCG00000030396,ENSSSCG00000011531,ENSSSCG00000008682,ENSSSCG00000021717,ENSSSCG00000023928,ENSSSCG00000009806,ENSSSCG00000009777,ENSSSCG00000006645,ENSSSCG00000017382,ENSSSCG00000007782,ENSSSCG00000023324,ENSSSCG00000013457,ENSSSCG00000011332,ENSSSCG00000006508,ENSSSCG00000013019,ENSSSCG00000009395,ENSSSCG00000028840,ENSSSCG00000001420,ENSSSCG00000014044,ENSSSCG00000015820	KMT2B,SETD7,--,WHSC1,SUV39H1,--,SETD1B,KMT5A,SETDB1,EZH1,SETD1A,--,DOT1L,SETD2,--,MEN1,SETDB2,EZH2,EHMT2,NSD1,WHSC1L1
GO:0050860	0.0999357	1	11	11	negative regulation of T cell receptor signaling pathway	BP	ENSSSCG00000005826,ENSSSCG00000029511,ENSSSCG00000007039,ENSSSCG00000009440,ENSSSCG00000004058,ENSSSCG00000015122,ENSSSCG00000001131,ENSSSCG00000023709,ENSSSCG00000020744,ENSSSCG00000025537,ENSSSCG00000021738	PHPT1,UBASH3A,PRNP,ELF1,EZR,THY1,--,PTPRJ,DUSP3,PTPN6,PTPN2
GO:0006952	0.100216	1	58	80	defense response	BP	ENSSSCG00000028528,ENSSSCG00000030557,ENSSSCG00000009469,ENSSSCG00000007218,ENSSSCG00000007214,ENSSSCG00000030733,ENSSSCG00000007226,ENSSSCG00000028629,ENSSSCG00000007215,ENSSSCG00000001741,ENSSSCG00000027151,ENSSSCG00000009972,ENSSSCG00000011011,ENSSSCG00000000708,ENSSSCG00000017637,ENSSSCG00000009138,ENSSSCG00000021576,ENSSSCG00000011334,ENSSSCG00000029085,ENSSSCG00000030721,ENSSSCG00000030966,…	--,--,--,BD129,DEFB128,DEFB124,DEFB123,DEFB121,DEFB116,DEFB114,--,KREMEN1,IFNK,TNFRSF1A,MPO,CFI,CD83,--,CH242-81E23.2-001,CH242-81E23.3,IFN-ALPHA-2,IFN-OMEGA-3,IFN-ALPHA-10,IFN-DELTA-6,IFN-OMEGA-7,IFN-ALPHA-17,IFN-DELTA-1,--,--,--,IFN-OMEGA-2,IFN-ALPHA-8,
GO:0005164	0.100356	1	19	21	tumor necrosis factor receptor binding	MF	ENSSSCG00000009542,ENSSSCG00000026872,ENSSSCG00000026695,ENSSSCG00000005838,ENSSSCG00000015488,ENSSSCG00000015487,ENSSSCG00000022370,ENSSSCG00000029950,ENSSSCG00000009429,ENSSSCG00000002525,ENSSSCG00000020906,ENSSSCG00000021647,ENSSSCG00000030172,ENSSSCG00000020784,ENSSSCG00000026633,ENSSSCG00000001405,ENSSSCG00000001404,ENSSSCG00000001403,ENSSSCG00000013291	TNFSF13B,TNFSF13,TNFSF14,TRAF2,TNFSF4,TNFSF18,TNFSF9,CD70,TNFSF11,TRAF3,TNFSF10,EDA,CD40LG,TNFSF15,TNFSF8,LTB,TNF,LTA,TRAF6
GO:0000082	0.100817	1	31	34	G1/S transition of mitotic cell cycle	BP	ENSSSCG00000027884,ENSSSCG00000002560,ENSSSCG00000027140,ENSSSCG00000010311,ENSSSCG00000016925,ENSSSCG00000028964,ENSSSCG00000024418,ENSSSCG00000000373,ENSSSCG00000022301,ENSSSCG00000017670,ENSSSCG00000011101,ENSSSCG00000009401,ENSSSCG00000015112,ENSSSCG00000013008,ENSSSCG00000006095,ENSSSCG00000021865,ENSSSCG00000017743,ENSSSCG00000016835,ENSSSCG00000025092,ENSSSCG00000009123,ENSSSCG00000002855,…	--,GPR132,CDKN1B,CAMK2G,PLK2,PIM2,RHOU,CDK2,--,RPS6KB1,ITGB1,RB1,HINFP,CDCA5,CCNE2,INHBA,CRLF3,SKP2,CDK4,CAMK2D,CCNE1,RCC1,--,ACVR1B,PLK3,PHF8,USP37,CDKN2D,EIF4E,ID4,IQGAP3
GO:0060041	0.102156	1	38	43	retina development in camera-type eye	BP	ENSSSCG00000028515,ENSSSCG00000003794,ENSSSCG00000009034,ENSSSCG00000000266,ENSSSCG00000021581,ENSSSCG00000005710,ENSSSCG00000004978,ENSSSCG00000006125,ENSSSCG00000029956,ENSSSCG00000027726,ENSSSCG00000011590,ENSSSCG00000014581,ENSSSCG00000030303,ENSSSCG00000004242,ENSSSCG00000004384,ENSSSCG00000028713,ENSSSCG00000022373,ENSSSCG00000011212,ENSSSCG00000017692,ENSSSCG00000015119,ENSSSCG00000017116,…	--,RPE65,--,PFDN5,CLCN2,LAMC3,NR2E3,CALB1,--,DLL1,RHO,TUB,ACHE,TBC1D32,NR2E1,RP1L1,JMJD6,RARB,LHX1,MFRP,LPCAT1,--,IFT140,SLC4A5,--,GRM6,--,RARG,SOX9,RD3,LHX2,BAX,GNAT1,BMPR1B,LAMB2,RP1,--,MYH10
GO:0003924	0.103531	1	197	239	GTPase activity	MF	ENSSSCG00000025163,ENSSSCG00000016593,ENSSSCG00000002823,ENSSSCG00000022163,ENSSSCG00000026022,ENSSSCG00000011619,ENSSSCG00000010099,ENSSSCG00000026473,ENSSSCG00000024963,ENSSSCG00000021660,ENSSSCG00000029828,ENSSSCG00000025041,ENSSSCG00000022342,ENSSSCG00000027737,ENSSSCG00000027429,ENSSSCG00000027712,ENSSSCG00000005285,ENSSSCG00000027826,ENSSSCG00000000040,ENSSSCG00000024577,ENSSSCG00000024839,…	--,ARF5,GNAO1,--,--,--,--,--,--,--,RAB5B,--,--,--,--,--,--,--,SEPT3,--,--,--,GNL1,RAB9B,SAR1B,RAB2B,EEF1A2,MX1,HRAS,ARL8B,GNL2,--,MX2,GNA14,--,ARL6,--,--,ARL5B,--,RAB8B,GSPT1,LSG1,RAB4A,SEPT4,DNM1L,RAB3C,--,--,--,--,--,RAB25,RHOU,--,GNAZ,RHOF,--,GUF1,RAB6
GO:0009311	0.103713	1	15	16	oligosaccharide metabolic process	BP	ENSSSCG00000027146,ENSSSCG00000000042,ENSSSCG00000025089,ENSSSCG00000000050,ENSSSCG00000015232,ENSSSCG00000025770,ENSSSCG00000017172,ENSSSCG00000017177,ENSSSCG00000014180,ENSSSCG00000024441,ENSSSCG00000023597,ENSSSCG00000011034,ENSSSCG00000008141,ENSSSCG00000002264,ENSSSCG00000005623	GLA,--,ST3GAL2,--,ST3GAL4,ST6GAL1,ST6GALNAC1,ST6GALNAC2,ST8SIA4,--,--,ST8SIA6,ST6GAL2,ST8SIA2,ST6GALNAC6
GO:0007520	0.10447	1	11	11	myoblast fusion	BP	ENSSSCG00000025022,ENSSSCG00000022891,ENSSSCG00000011889,ENSSSCG00000000145,ENSSSCG00000009131,ENSSSCG00000029411,ENSSSCG00000004270,ENSSSCG00000027197,ENSSSCG00000013375,ENSSSCG00000000183,ENSSSCG00000022784	FER1L5,TMEM8C,GSK3B,MYH9,PITX2,CAPN2,ADGRB3,DYRK1B,MYOD1,WNT1,PLEKHO1
GO:0043922	0.104832	1	8	8	negative regulation by host of viral transcription	BP	ENSSSCG00000023357,ENSSSCG00000008893,ENSSSCG00000017698,ENSSSCG00000017700,ENSSSCG00000030839,ENSSSCG00000017705,ENSSSCG00000005101,ENSSSCG00000028237	--,--,CCL4,CCL3L1,JUN,CCL5,--,--
GO:1900004	0.10487	1	4	4	negative regulation of serine-type endopeptidase activity	BP	ENSSSCG00000026320,ENSSSCG00000027244,ENSSSCG00000014422,ENSSSCG00000014424	SPINK2,SPINK1,SPINK5,--
GO:0006893	0.106737	1	9	9	Golgi to plasma membrane transport	BP	ENSSSCG00000008839,ENSSSCG00000023269,ENSSSCG00000022882,ENSSSCG00000012297,ENSSSCG00000015714,ENSSSCG00000007460,ENSSSCG00000001977,ENSSSCG00000008376,ENSSSCG00000000985	CHIC2,EXOC1,--,CCDC22,CCDC93,ARFGEF2,STXBP6,COMMD1,EXOC2
GO:0005741	0.107403	1	58	69	mitochondrial outer membrane	CC	ENSSSCG00000008834,ENSSSCG00000014116,ENSSSCG00000022763,ENSSSCG00000020793,ENSSSCG00000015384,ENSSSCG00000010320,ENSSSCG00000002315,ENSSSCG00000003963,ENSSSCG00000013033,ENSSSCG00000008648,ENSSSCG00000010469,ENSSSCG00000015481,ENSSSCG00000014197,ENSSSCG00000028346,ENSSSCG00000006361,ENSSSCG00000007025,ENSSSCG00000007026,ENSSSCG00000025686,ENSSSCG00000022831,ENSSSCG00000004765,ENSSSCG00000000784,…	--,--,--,VDAC3,TOMM7,VDAC2,SLC8A3,--,BAD,RSAD2,MARCH5,MYOC,SLC25A46,SAMM50,PPOX,--,--,KMO,--,RMDN3,LRRK2,PPP1CC,BAK1,BCL2L10,BCL2,TOMM20L,MTX1,TOMM22,CISD1,BNIP3,CISD2,USP30,HK2,--,AIFM2,ABCB6,BCL2L2,TOMM40L,DAO,GPAM,HADHB,TIGAR,TMEM173,MAOA,MFN2,MAOB,--,
GO:0070016	0.107613	1	10	10	armadillo repeat domain binding	MF	ENSSSCG00000030553,ENSSSCG00000017265,ENSSSCG00000030568,ENSSSCG00000028481,ENSSSCG00000023204,ENSSSCG00000009148,ENSSSCG00000003104,ENSSSCG00000002799,ENSSSCG00000008499,ENSSSCG00000010638	CTNNBIP1,--,--,CALCOCO1,AXIN1,LEF1,STRN4,CNOT1,STRN,TCF7L2
GO:0019216	0.107901	1	17	18	regulation of lipid metabolic process	BP	ENSSSCG00000010930,ENSSSCG00000008714,ENSSSCG00000014307,ENSSSCG00000001924,ENSSSCG00000009427,ENSSSCG00000010281,ENSSSCG00000027017,ENSSSCG00000023969,ENSSSCG00000001725,ENSSSCG00000004633,ENSSSCG00000007665,ENSSSCG00000010955,ENSSSCG00000002507,ENSSSCG00000008444,ENSSSCG00000007371,ENSSSCG00000008645,ENSSSCG00000025729	ADIPOR1,PSAPL1,H2AFY,BBS4,DNAJC15,PSAP,NR1D2,ACER1,ADGRF5,TNFAIP8L3,--,GOLM1,BCL11B,PRKCE,HNF4A,ID2,IRS1
GO:0035640	0.108326	1	10	10	exploration behavior	BP	ENSSSCG00000021269,ENSSSCG00000011524,ENSSSCG00000012600,ENSSSCG00000016940,ENSSSCG00000000784,ENSSSCG00000023859,ENSSSCG00000017578,ENSSSCG00000002653,ENSSSCG00000002446,ENSSSCG00000026330	SHANK3,CHL1,AGTR2,HTR1A,LRRK2,LRRTM1,ITGA3,JPH3,--,--
GO:0030330	0.108537	1	14	15	DNA damage response, signal transduction by p53 class mediator	BP	ENSSSCG00000000950,ENSSSCG00000030582,ENSSSCG00000025959,ENSSSCG00000002670,ENSSSCG00000012434,ENSSSCG00000015284,ENSSSCG00000010067,ENSSSCG00000004387,ENSSSCG00000029438,ENSSSCG00000004478,ENSSSCG00000005944,ENSSSCG00000017950,ENSSSCG00000009908,ENSSSCG00000027426	E2F7,BATF,--,--,--,MDM4,MIF,FOXO3,--,MYO6,NDRG1,TP53,TRIAP1,BCL3
GO:0042060	0.109139	1	31	34	wound healing	BP	ENSSSCG00000016878,ENSSSCG00000027821,ENSSSCG00000010998,ENSSSCG00000028437,ENSSSCG00000010834,ENSSSCG00000017277,ENSSSCG00000008730,ENSSSCG00000003539,ENSSSCG00000005446,ENSSSCG00000007401,ENSSSCG00000000006,ENSSSCG00000030270,ENSSSCG00000014561,ENSSSCG00000014987,ENSSSCG00000024759,ENSSSCG00000001569,ENSSSCG00000016174,ENSSSCG00000001539,ENSSSCG00000009237,ENSSSCG00000000554,ENSSSCG00000017748,…	FGF10,--,B4GALT1,--,MIA3,PECAM1,DRD5,GRHL3,EPB41L4B,SDC4,PPARA,CNN2,NLRP6,MMP12,CX3CL1,C6orf89,FN1,PPARD,HPSE,FGFR1OP2,NF1,ARHGEF19,ELK3,WNT5A,PAK1,PTK7,--,ERBB2,ALOX15,VANGL2,CORO1B
GO:0043410	0.109213	1	60	70	positive regulation of MAPK cascade	BP	ENSSSCG00000016599,ENSSSCG00000020672,ENSSSCG00000016878,ENSSSCG00000008842,ENSSSCG00000011771,ENSSSCG00000009048,ENSSSCG00000008844,ENSSSCG00000014007,ENSSSCG00000030827,ENSSSCG00000009996,ENSSSCG00000009997,ENSSSCG00000025591,ENSSSCG00000021165,ENSSSCG00000016635,ENSSSCG00000014804,ENSSSCG00000003756,ENSSSCG00000012861,ENSSSCG00000017548,ENSSSCG00000010281,ENSSSCG00000021134,ENSSSCG00000031047,…	GPR37,F2R,FGF10,KIT,SOX2,GAB1,KDR,FLT4,--,LIF,OSM,HRAS,ADRB2,CAV2,LAMTOR1,LPAR3,--,NGFR,PSAP,PELI2,CH242-363D24.1,ADRA1A,FLT1,RIPK1,PDGFA,RELT,FAM58A,TNFRSF1B,IGFBP4,CD40,CD27,TNFRSF11A,AR,LTBR,GPER1,TNFRSF4,CDK10,CDC42,C1QTNF1,HMGB1,--,--,--,ZNF622,KSR1,GPR37L1,ALOX12B,PRKCE,NENF,GRM4,DAB2IP,TNFRSF11B,SORBS3,EPHA8,DNAJC27,MADD,TNFRSF25,CDH2,FGFR1,ADRB3
GO:0048536	0.109644	1	28	31	spleen development	BP	ENSSSCG00000016878,ENSSSCG00000010448,ENSSSCG00000005706,ENSSSCG00000004714,ENSSSCG00000024594,ENSSSCG00000007031,ENSSSCG00000008081,ENSSSCG00000016984,ENSSSCG00000004616,ENSSSCG00000004142,ENSSSCG00000009557,ENSSSCG00000004895,ENSSSCG00000006809,ENSSSCG00000009131,ENSSSCG00000006331,ENSSSCG00000016393,ENSSSCG00000009157,ENSSSCG00000013783,ENSSSCG00000001061,ENSSSCG00000006106,ENSSSCG00000015590,…	FGF10,FAS,ABL1,EPB42,NKX3-2,POLB,BARX1,NKX2-5,ONECUT1,CITED2,PCID2,BCL2,RBM15,PITX2,PBX1,--,TET2,--,JARID2,CDH17,FLVCR1,NKX2-3,TCF21,CTC1,HOXB4,RIPK3,BCL3,CACNB4
GO:0010832	0.109947	1	9	9	negative regulation of myotube differentiation	BP	ENSSSCG00000005713,ENSSSCG00000007757,ENSSSCG00000007600,ENSSSCG00000016984,ENSSSCG00000028552,ENSSSCG00000010522,ENSSSCG00000017366,ENSSSCG00000006002,ENSSSCG00000024777	PLPP7,TRIM72,BHLHA15,NKX2-5,BHLHE41,ANKRD2,--,NOV,HDAC4
GO:0048485	0.11005	1	11	11	sympathetic nervous system development	BP	ENSSSCG00000025592,ENSSSCG00000008649,ENSSSCG00000014328,ENSSSCG00000011102,ENSSSCG00000014813,ENSSSCG00000006464,ENSSSCG00000017748,ENSSSCG00000009703,ENSSSCG00000001081,ENSSSCG00000011125,ENSSSCG00000021562	TP63,SOX11,GFRA3,NRP1,PHOX2A,NTRK1,NF1,HAND2,SOX4,GATA3,PLXNA4
GO:0021846	0.110105	1	10	10	cell proliferation in forebrain	BP	ENSSSCG00000010170,ENSSSCG00000010912,ENSSSCG00000010671,ENSSSCG00000004234,ENSSSCG00000021343,ENSSSCG00000020801,ENSSSCG00000011606,ENSSSCG00000015036,ENSSSCG00000029870,ENSSSCG00000009869	DISC1,--,EMX2,FABP7,ZEB2,ARX,WNT7A,DIXDC1,WNT3A,LHX5
GO:0031901	0.110411	1	19	20	early endosome membrane	CC	ENSSSCG00000016626,ENSSSCG00000008689,ENSSSCG00000028968,ENSSSCG00000016230,ENSSSCG00000007425,ENSSSCG00000004385,ENSSSCG00000003485,ENSSSCG00000010573,ENSSSCG00000012698,ENSSSCG00000002921,ENSSSCG00000007062,ENSSSCG00000011628,ENSSSCG00000007560,ENSSSCG00000007088,ENSSSCG00000003863,ENSSSCG00000007509,ENSSSCG00000016147,ENSSSCG00000015252,ENSSSCG00000007130	CFTR,ZFYVE28,RAC1,EPHA4,SNX21,SNX3,RCC2,HPS6,SLC9A6,CLIP3,LAMP5,DNAJC13,TMEM184A,SNX5,--,PMEPA1,PIKFYVE,SNX19,SYNDIG1
GO:0043507	0.110621	1	25	27	positive regulation of JUN kinase activity	BP	ENSSSCG00000021266,ENSSSCG00000026592,ENSSSCG00000025472,ENSSSCG00000022860,ENSSSCG00000025374,ENSSSCG00000001050,ENSSSCG00000005838,ENSSSCG00000014855,ENSSSCG00000016230,ENSSSCG00000009751,ENSSSCG00000021343,ENSSSCG00000001437,ENSSSCG00000004898,ENSSSCG00000001572,ENSSSCG00000025689,ENSSSCG00000029852,ENSSSCG00000008018,ENSSSCG00000016140,ENSSSCG00000014878,ENSSSCG00000028036,ENSSSCG00000005524,…	MAP3K11,TLR6,MAP3K7,SASH1,DVL3,EDN1,TRAF2,RPS3,EPHA4,FZD10,ZEB2,AGER,TNFRSF11A,FGD2,--,WNT5A,MAPK8IP3,FZD5,PAK1,MAP3K10,DAB2IP,FZD4,VANGL2,TNF,TRAF6
GO:0060158	0.110699	1	10	10	phospholipase C-activating dopamine receptor signaling pathway	BP	ENSSSCG00000015048,ENSSSCG00000005285,ENSSSCG00000005284,ENSSSCG00000008730,ENSSSCG00000024289,ENSSSCG00000029037,ENSSSCG00000029279,ENSSSCG00000029096,ENSSSCG00000017232,ENSSSCG00000013473	DRD2,--,GNA14,DRD5,--,--,GNA11,HRH2,SLC9A3R1,GNA15
GO:0097602	0.111889	1	9	9	cullin family protein binding	MF	ENSSSCG00000008831,ENSSSCG00000022783,ENSSSCG00000025719,ENSSSCG00000007854,ENSSSCG00000012297,ENSSSCG00000029774,ENSSSCG00000014989,ENSSSCG00000026536,ENSSSCG00000000135	DCUN1D4,DCUN1D1,--,DCUN1D3,CCDC22,RNF7,DCUN1D5,DCUN1D2,KCTD17
GO:0005765	0.112412	1	106	124	lysosomal membrane	CC	ENSSSCG00000027288,ENSSSCG00000029045,ENSSSCG00000026239,ENSSSCG00000022506,ENSSSCG00000005285,ENSSSCG00000014098,ENSSSCG00000015351,ENSSSCG00000015074,ENSSSCG00000007167,ENSSSCG00000002295,ENSSSCG00000009075,ENSSSCG00000026097,ENSSSCG00000029615,ENSSSCG00000002298,ENSSSCG00000006489,ENSSSCG00000008714,ENSSSCG00000006728,ENSSSCG00000006121,ENSSSCG00000022494,ENSSSCG00000023731,ENSSSCG00000001800,…	DAGLB,--,VPS35,--,--,WDR41,TMEM106B,SIDT2,VPS16,VTI1B,MFSD8,LAMP3,VAMP7,ZFYVE26,TMEM79,PSAPL1,GDAP2,TMEM55A,TMEM59,--,TM6SF1,ANXA2,ATP6V1C2,ATP6V1E1,VPS39,LAMTOR2,ATP6V0D1,TMEM63A,LAPTM5,TRIM23,GNA11,RDH14,--,RAB5C,TLDC1,AP3M1,ANPEP,ATP6V1H,VPS18,--,SLA-DRA,RRAGA,TMEM175,SPNS3,ECE1,PSEN1,SPNS2,TECPR1,SCARB2,NCSTN,SLC15A3,GBA,SLC36A1,SLC30A2,VASN,TMEM8A,UBA1,CYB561A3,TMEM55B,CTNS,ABCB9,LNPEP,SPPL2…
GO:0000792	0.112822	1	18	19	heterochromatin	CC	ENSSSCG00000002836,ENSSSCG00000021717,ENSSSCG00000015568,ENSSSCG00000017161,ENSSSCG00000024261,ENSSSCG00000021698,ENSSSCG00000012434,ENSSSCG00000013517,ENSSSCG00000000090,ENSSSCG00000012270,ENSSSCG00000011213,ENSSSCG00000007479,ENSSSCG00000004528,ENSSSCG00000011081,ENSSSCG00000013659,ENSSSCG00000012796,ENSSSCG00000029413,ENSSSCG00000013435	SALL1,SUV39H1,RNF2,CBX8,CBX2,RRP1B,--,UHRF1,CBX7,UBA1,TOP2B,SALL4,MBD2,BMI1,DNMT1,MECP2,DNMT3A,MBD3
GO:0004869	0.113348	1	19	23	cysteine-type endopeptidase inhibitor activity	MF	ENSSSCG00000025987,ENSSSCG00000008513,ENSSSCG00000011799,ENSSSCG00000011800,ENSSSCG00000011802,ENSSSCG00000026213,ENSSSCG00000012960,ENSSSCG00000011334,ENSSSCG00000027357,ENSSSCG00000028871,ENSSSCG00000016315,ENSSSCG00000007121,ENSSSCG00000007122,ENSSSCG00000007123,ENSSSCG00000007124,ENSSSCG00000007125,ENSSSCG00000029289,ENSSSCG00000029889,ENSSSCG00000007131	--,BIRC6,AHSG,FETUB,--,--,CST6,--,CSTB,--,--,CSTL1,CST11,--,CST8,--,CST9L,CST3,CST7
GO:0001578	0.11352	1	19	20	microtubule bundle formation	BP	ENSSSCG00000016151,ENSSSCG00000021986,ENSSSCG00000022389,ENSSSCG00000022538,ENSSSCG00000003684,ENSSSCG00000000209,ENSSSCG00000002780,ENSSSCG00000016974,ENSSSCG00000026748,ENSSSCG00000008517,ENSSSCG00000010351,ENSSSCG00000006832,ENSSSCG00000012584,ENSSSCG00000013884,ENSSSCG00000025564,ENSSSCG00000010914,ENSSSCG00000009793,ENSSSCG00000001818,ENSSSCG00000017542	MAP2,--,TPPP,--,MTCL1,NCKAP5L,TPPP3,MAP1B,PLK1,SPAST,CCSER2,PSRC1,CAPN6,MAP1S,GAS2L1,--,CLIP1,FES,TTLL6
GO:0031432	0.113698	1	10	10	titin binding	MF	ENSSSCG00000010461,ENSSSCG00000004728,ENSSSCG00000025768,ENSSSCG00000027684,ENSSSCG00000009123,ENSSSCG00000008200,ENSSSCG00000008433,ENSSSCG00000010522,ENSSSCG00000010144,ENSSSCG00000017500	ANKRD1,CAPN3,CALM1,TRIM63,CAMK2D,ANKRD23,--,ANKRD2,ACTN2,TCAP
GO:0060413	0.113881	1	11	11	atrial septum morphogenesis	BP	ENSSSCG00000016883,ENSSSCG00000016662,ENSSSCG00000016569,ENSSSCG00000006696,ENSSSCG00000004223,ENSSSCG00000016984,ENSSSCG00000022383,ENSSSCG00000006940,ENSSSCG00000016393,ENSSSCG00000006709,ENSSSCG00000009867	ISL1,TBX20,SMO,GJA5,HEY2,NKX2-5,GATA4,CYR61,--,--,TBX5
GO:0035869	0.114174	1	19	20	ciliary transition zone	CC	ENSSSCG00000000926,ENSSSCG00000026713,ENSSSCG00000023776,ENSSSCG00000008738,ENSSSCG00000001924,ENSSSCG00000026889,ENSSSCG00000009826,ENSSSCG00000013084,ENSSSCG00000020716,ENSSSCG00000012849,ENSSSCG00000016843,ENSSSCG00000016370,ENSSSCG00000017635,ENSSSCG00000014151,ENSSSCG00000024089,ENSSSCG00000029843,ENSSSCG00000027528,ENSSSCG00000025228,ENSSSCG00000002708	CEP290,TMEM17,CCSAP,CC2D2A,BBS4,TMEM237,TCTN1,TMEM216,UNC119B,TMEM80,C5orf42,SEPT2,MKS1,CETN3,C5orf30,--,TMEM107,--,--
GO:0045116	0.114471	1	10	10	protein neddylation	BP	ENSSSCG00000008831,ENSSSCG00000022783,ENSSSCG00000007854,ENSSSCG00000029774,ENSSSCG00000014989,ENSSSCG00000027723,ENSSSCG00000028143,ENSSSCG00000026536,ENSSSCG00000011506,ENSSSCG00000001236	DCUN1D4,DCUN1D1,DCUN1D3,RNF7,DCUN1D5,--,NEDD8,DCUN1D2,UBA3,TRIM40
GO:0070301	0.114696	1	17	18	cellular response to hydrogen peroxide	BP	ENSSSCG00000005706,ENSSSCG00000015987,ENSSSCG00000005724,ENSSSCG00000023765,ENSSSCG00000025545,ENSSSCG00000014855,ENSSSCG00000023503,ENSSSCG00000010235,ENSSSCG00000008598,ENSSSCG00000004154,ENSSSCG00000023105,ENSSSCG00000010702,ENSSSCG00000028840,ENSSSCG00000003713,ENSSSCG00000017962,ENSSSCG00000029150,ENSSSCG00000003385	ABL1,NFE2L2,SETX,PCGF2,HDAC6,RPS3,PRKCD,SIRT1,RHOB,TNFAIP3,NET1,PLEKHA1,EZH2,IMPACT,KDM6B,FXN,PARK7
GO:0030426	0.114749	1	28	31	growth cone	CC	ENSSSCG00000026089,ENSSSCG00000009203,ENSSSCG00000015066,ENSSSCG00000005724,ENSSSCG00000000275,ENSSSCG00000004309,ENSSSCG00000030345,ENSSSCG00000010665,ENSSSCG00000027407,ENSSSCG00000000784,ENSSSCG00000005063,ENSSSCG00000012012,ENSSSCG00000002340,ENSSSCG00000010140,ENSSSCG00000017311,ENSSSCG00000011889,ENSSSCG00000023859,ENSSSCG00000001771,ENSSSCG00000010860,ENSSSCG00000001858,ENSSSCG00000012251,…	--,SNCA,ZPR1,SETX,MAP3K12,CNR1,INPP5J,--,--,LRRK2,OTX2,--,PSEN1,RTN4R,MAPT,GSK3B,LRRTM1,RASGRF1,PSEN2,CIB1,USP9X,APBB1,DVL1,DTNBP1,--,--,NRSN1,MYH10
[truncated: 12,314 more rows]

## Sheet: GO enrichment of DE lncRNA
GO enrichment of different expressed lncRNA target gene
Category	p-value	q-value	Different Expressed	Background	Term	Ontology	Different Expressed Gene ID	Gene Symbol
[truncated: 4,110 more rows]

## Sheet: GO enrichment of DE circRNA
GO enrichment of different expressed circRNA source gene
[truncated: 806 more rows]

[truncated: 1 more sheets: GO-together]
