# Supplementary material for: Dynamic Changes of DNA Methylation and Transcriptome Expression in Porcine Ovaries during Aging
Source: Biomed Res Int. 2019 Oct 30;2019:8732023. doi: 10.1155/2019/8732023 (PMC6874880; doi:10.1155/2019/8732023)
Supplement: Supplementary Materials — Table S1: primer sequences for q-PCR. Table S2: summary of sequence data and read-alignment statistics. Table S3: percentage of cytosine methylation after extraction. Table S4: association analysis of regulated genes between both ovarian development stages. Table S5: overlap between different methylation regions and differentially expressed genes. Figure S1: DNA methylation levels of CpG CHG and CHH on each chromosome. Figure S2: Pearson's correlation between DNA methylation level and chromosomal features. (A) Scatter plot and trend line (Pearson's correlation), indicating the correlation between the chromosome length and methylation level. (B) Scatter plot and trend line (Pearson's correlation), indicating the correlation between the chromosome GC content and methylation level. (C) Scatter plot and trend line (Pearson's correlation), indicating the correlation between the gene number in chromosome and methylation. (D) Scatter plot and trend line (Pearson's correlation), indicating the correlation between the chromosome CGI ratio and methylation level. (E) Scatter plot and trend line (Pearson's correlation), indicating the correlation between the chromosome repeat number and methylation level. Figure S3: verification of whole genome bisulfite and RNA sequencing data. (A) DNA methylation was verified via bisulfite sequencing PCR. The expression levels of mRNAs (B), miRNAs (C), lncRNAs (D), and circRNAs (E) were verified via q-PCR and adjusted by three endogenous control genes (porcine GAPDH, ACTB, and U6 snRNA). Figure S4: DNA methylation levels and RNA expression levels on each chromosome. Supplementary Database S1: summary and function enrichment of different methylation regions. Supplementary Database S2: identified mRNAs, miRNAs, lncRNAs, and circRNAs in all samples. Supplementary Database S3: differentially expressed mRNAs, miRNAs, lncRNAs, and circRNAs between both stages. Supplementary Database S4: GO analysis of differentially expressed RNAs and function over [file 8732023.f1.zip › 8732023.f1/Supplementary Database 5.xlsx]

## Sheet: Target by MRE
mRNA,lncRNA,circRNA target miRNA by MRE
miRNA	miRNA_target
ssc-miR-125b	ENSSSCG00000021073
ssc-miR-125b	ENSSSCG00000031039
ssc-miR-125b	ENSSSCG00000022958
ssc-miR-125b	ENSSSCG00000013898
ssc-miR-125b	ENSSSCG00000005715
ssc-miR-125b	ENSSSCG00000021724
ssc-miR-125b	ENSSSCG00000005894
ssc-miR-125b	ENSSSCG00000001885
ssc-miR-125b	ENSSSCG00000027812
ssc-miR-125b	ENSSSCG00000000001
ssc-miR-125b	ENSSSCG00000029627
ssc-miR-125b	ENSSSCG00000009612
ssc-miR-125b	ENSSSCG00000013303
ssc-miR-125b	ENSSSCG00000003360
ssc-miR-125b	ENSSSCG00000007939
ssc-miR-125b	ENSSSCG00000003353
ssc-miR-125b	ENSSSCG00000006399
ssc-miR-125b	ENSSSCG00000018055
ssc-miR-125b	ENSSSCG00000005828
ssc-miR-125b	ENSSSCG00000015250
ssc-miR-125b	ENSSSCG00000030008
ssc-miR-125b	ENSSSCG00000029426
ssc-miR-125b	ENSSSCG00000011145
ssc-miR-125b	ENSSSCG00000006543
ssc-miR-125b	ENSSSCG00000007559
ssc-miR-125b	ENSSSCG00000013668
ssc-miR-125b	ENSSSCG00000029761
ssc-miR-125b	ENSSSCG00000026551
ssc-miR-125b	ENSSSCG00000027361
ssc-miR-125b	ENSSSCG00000005853
ssc-miR-125b	ENSSSCG00000002451
ssc-miR-125b	ENSSSCG00000029901
ssc-miR-125b	ENSSSCG00000007577
ssc-miR-125b	ENSSSCG00000012848
ssc-miR-125b	ENSSSCG00000012846
ssc-miR-125b	ENSSSCG00000001561
ssc-miR-125b	ENSSSCG00000029723
ssc-miR-125b	ENSSSCG00000002633
ssc-miR-125b	ENSSSCG00000010003
ssc-miR-125b	ENSSSCG00000005749
ssc-miR-125b	ENSSSCG00000001873
ssc-miR-125b	ENSSSCG00000008692
ssc-miR-125b	ENSSSCG00000014397
ssc-miR-125b	ENSSSCG00000014390
ssc-miR-125b	ENSSSCG00000012878
ssc-miR-125b	ENSSSCG00000014875
ssc-miR-125b	ENSSSCG00000029570
ssc-miR-125b	ENSSSCG00000023747
ssc-miR-125b	ENSSSCG00000003592
ssc-miR-125b	ENSSSCG00000011255
ssc-miR-125b	ENSSSCG00000009997
ssc-miR-125b	ENSSSCG00000027710
ssc-miR-125b	ENSSSCG00000005922
ssc-miR-125b	ENSSSCG00000016338
ssc-miR-125b	ENSSSCG00000005489
ssc-miR-125b	ENSSSCG00000004758
ssc-miR-125b	ENSSSCG00000002972
ssc-miR-125b	ENSSSCG00000021196
ssc-miR-125b	ENSSSCG00000005832
ssc-miR-125b	ENSSSCG00000007981
ssc-miR-125b	ENSSSCG00000016502
ssc-miR-125b	ENSSSCG00000012852
ssc-miR-125b	ENSSSCG00000021361
ssc-miR-125b	ENSSSCG00000015099
ssc-miR-125b	ENSSSCG00000014303
ssc-miR-125b	ENSSSCG00000016763
ssc-miR-125b	ENSSSCG00000005921
ssc-miR-216	ENSSSCG00000011046
ssc-miR-216	ENSSSCG00000008681
ssc-miR-216	ENSSSCG00000003941
ssc-miR-216	ENSSSCG00000003592
ssc-miR-216	ENSSSCG00000029328
ssc-miR-216	ENSSSCG00000023677
ssc-miR-124a	ENSSSCG00000005710
ssc-miR-124a	ENSSSCG00000029852
ssc-miR-124a	ENSSSCG00000013898
ssc-miR-124a	ENSSSCG00000030358
ssc-miR-124a	ENSSSCG00000013303
ssc-miR-124a	ENSSSCG00000030008
ssc-miR-124a	ENSSSCG00000011145
ssc-miR-124a	ENSSSCG00000029333
ssc-miR-124a	ENSSSCG00000007559
ssc-miR-124a	ENSSSCG00000027361
ssc-miR-124a	ENSSSCG00000002451
ssc-miR-124a	ENSSSCG00000024777
ssc-miR-124a	ENSSSCG00000030337
ssc-miR-124a	ENSSSCG00000012886
ssc-miR-124a	ENSSSCG00000029881
ssc-miR-124a	ENSSSCG00000027890
ssc-miR-124a	ENSSSCG00000012878
ssc-miR-124a	ENSSSCG00000025717
ssc-miR-124a	ENSSSCG00000010949
ssc-miR-124a	ENSSSCG00000003006
ssc-miR-124a	ENSSSCG00000016763
ssc-miR-9-1	ENSSSCG00000017444
ssc-miR-9-1	ENSSSCG00000005894
ssc-miR-9-1	ENSSSCG00000004138
ssc-miR-9-1	ENSSSCG00000024610
ssc-miR-9-1	ENSSSCG00000001619
ssc-miR-9-1	ENSSSCG00000007939
ssc-miR-9-1	ENSSSCG00000017461
ssc-miR-9-1	ENSSSCG00000010381
ssc-miR-9-1	ENSSSCG00000003016
ssc-miR-9-1	ENSSSCG00000013464
ssc-miR-9-1	ENSSSCG00000011158
ssc-miR-9-1	ENSSSCG00000010491
ssc-miR-9-1	ENSSSCG00000009761
ssc-miR-9-1	ENSSSCG00000003702
ssc-miR-9-1	ENSSSCG00000023178
ssc-miR-9-1	ENSSSCG00000010098
ssc-miR-9-1	ENSSSCG00000001006
ssc-miR-9-1	ENSSSCG00000013087
ssc-miR-9-1	ENSSSCG00000023496
ssc-miR-9-1	ENSSSCG00000025717
ssc-miR-9-1	ENSSSCG00000004758
ssc-miR-9-1	ENSSSCG00000021196
ssc-miR-9-1	ENSSSCG00000012852
ssc-miR-9-1	ENSSSCG00000015099
ssc-miR-9-1	ENSSSCG00000024743
ssc-miR-9-1	ENSSSCG00000023659
ssc-miR-9-1	ENSSSCG00000005385
ssc-miR-9-2	ENSSSCG00000017444
ssc-miR-9-2	ENSSSCG00000005894
ssc-miR-9-2	ENSSSCG00000004138
ssc-miR-9-2	ENSSSCG00000024610
ssc-miR-9-2	ENSSSCG00000001619
ssc-miR-9-2	ENSSSCG00000007939
ssc-miR-9-2	ENSSSCG00000017461
ssc-miR-9-2	ENSSSCG00000010381
ssc-miR-9-2	ENSSSCG00000003016
ssc-miR-9-2	ENSSSCG00000013464
ssc-miR-9-2	ENSSSCG00000011158
ssc-miR-9-2	ENSSSCG00000010491
ssc-miR-9-2	ENSSSCG00000009761
ssc-miR-9-2	ENSSSCG00000003702
ssc-miR-9-2	ENSSSCG00000023178
ssc-miR-9-2	ENSSSCG00000010098
ssc-miR-9-2	ENSSSCG00000001006
ssc-miR-9-2	ENSSSCG00000013087
ssc-miR-9-2	ENSSSCG00000023496
ssc-miR-9-2	ENSSSCG00000025717
ssc-miR-9-2	ENSSSCG00000004758
ssc-miR-9-2	ENSSSCG00000021196
ssc-miR-9-2	ENSSSCG00000012852
ssc-miR-9-2	ENSSSCG00000015099
ssc-miR-9-2	ENSSSCG00000024743
ssc-miR-9-2	ENSSSCG00000023659
ssc-miR-9-2	ENSSSCG00000005385
ssc-miR-133a-3p	ENSSSCG00000021073
ssc-miR-133a-3p	ENSSSCG00000021521
ssc-miR-133a-3p	ENSSSCG00000002640
ssc-miR-133a-3p	ENSSSCG00000015657
ssc-miR-133a-3p	ENSSSCG00000025047
ssc-miR-133a-3p	ENSSSCG00000005894
ssc-miR-133a-3p	ENSSSCG00000013534
ssc-miR-133a-3p	ENSSSCG00000017481
ssc-miR-133a-3p	ENSSSCG00000025561
ssc-miR-133a-3p	ENSSSCG00000029627
ssc-miR-133a-3p	ENSSSCG00000008000
ssc-miR-133a-3p	ENSSSCG00000003360
ssc-miR-133a-3p	ENSSSCG00000029391
ssc-miR-133a-3p	ENSSSCG00000001619
ssc-miR-133a-3p	ENSSSCG00000007939
ssc-miR-133a-3p	ENSSSCG00000012793
ssc-miR-133a-3p	ENSSSCG00000011046
ssc-miR-133a-3p	ENSSSCG00000005490
ssc-miR-133a-3p	ENSSSCG00000023680
ssc-miR-133a-3p	ENSSSCG00000018055
ssc-miR-133a-3p	ENSSSCG00000005828
ssc-miR-133a-3p	ENSSSCG00000015250
ssc-miR-133a-3p	ENSSSCG00000024671
ssc-miR-133a-3p	ENSSSCG00000024310
ssc-miR-133a-3p	ENSSSCG00000012732
ssc-miR-133a-3p	ENSSSCG00000013668
ssc-miR-133a-3p	ENSSSCG00000007577
ssc-miR-133a-3p	ENSSSCG00000011643
ssc-miR-133a-3p	ENSSSCG00000013464
ssc-miR-133a-3p	ENSSSCG00000012848
ssc-miR-133a-3p	ENSSSCG00000012968
ssc-miR-133a-3p	ENSSSCG00000001561
ssc-miR-133a-3p	ENSSSCG00000024777
ssc-miR-133a-3p	ENSSSCG00000029723
ssc-miR-133a-3p	ENSSSCG00000022289
ssc-miR-133a-3p	ENSSSCG00000003941
ssc-miR-133a-3p	ENSSSCG00000009512
ssc-miR-133a-3p	ENSSSCG00000003393
ssc-miR-133a-3p	ENSSSCG00000023178
ssc-miR-133a-3p	ENSSSCG00000014390
ssc-miR-133a-3p	ENSSSCG00000027890
ssc-miR-133a-3p	ENSSSCG00000029570
ssc-miR-133a-3p	ENSSSCG00000026367
ssc-miR-133a-3p	ENSSSCG00000014056
ssc-miR-133a-3p	ENSSSCG00000003592
ssc-miR-133a-3p	ENSSSCG00000009997
ssc-miR-133a-3p	ENSSSCG00000027710
ssc-miR-133a-3p	ENSSSCG00000005489
ssc-miR-133a-3p	ENSSSCG00000021196
ssc-miR-133a-3p	ENSSSCG00000023242
ssc-miR-133a-3p	ENSSSCG00000025325
ssc-miR-133a-3p	ENSSSCG00000010949
ssc-miR-133a-3p	ENSSSCG00000015099
ssc-miR-133a-3p	ENSSSCG00000008697
ssc-miR-133a-3p	ENSSSCG00000023861
ssc-miR-664-3p	ENSSSCG00000029852
ssc-miR-664-3p	ENSSSCG00000024115
ssc-miR-664-3p	ENSSSCG00000006399
ssc-miR-664-3p	ENSSSCG00000023680
ssc-miR-664-3p	ENSSSCG00000013464
ssc-miR-664-3p	ENSSSCG00000001561
ssc-miR-664-3p	ENSSSCG00000027970
ssc-miR-664-3p	ENSSSCG00000029189
ssc-miR-664-3p	ENSSSCG00000005706
ssc-miR-664-3p	ENSSSCG00000015733
ssc-miR-92a	ENSSSCG00000016340
ssc-miR-92a	ENSSSCG00000000001
ssc-miR-92a	ENSSSCG00000024391
ssc-miR-92a	ENSSSCG00000029627
ssc-miR-92a	ENSSSCG00000005490
ssc-miR-92a	ENSSSCG00000014822
ssc-miR-92a	ENSSSCG00000012732
ssc-miR-92a	ENSSSCG00000006543
ssc-miR-92a	ENSSSCG00000008681
ssc-miR-92a	ENSSSCG00000013464
ssc-miR-92a	ENSSSCG00000029723
ssc-miR-92a	ENSSSCG00000009512
ssc-miR-92a	ENSSSCG00000029881
ssc-miR-92a	ENSSSCG00000010003
ssc-miR-92a	ENSSSCG00000027970
ssc-miR-92a	ENSSSCG00000025893
ssc-miR-92a	ENSSSCG00000030520
ssc-miR-92a	ENSSSCG00000015733
ssc-miR-92b-5p	ENSSSCG00000021073
ssc-miR-92b-5p	ENSSSCG00000005710
ssc-miR-92b-5p	ENSSSCG00000021475
ssc-miR-92b-5p	ENSSSCG00000029852
ssc-miR-92b-5p	ENSSSCG00000021521
ssc-miR-92b-5p	ENSSSCG00000004856
ssc-miR-92b-5p	ENSSSCG00000022958
ssc-miR-92b-5p	ENSSSCG00000028304
ssc-miR-92b-5p	ENSSSCG00000015657
ssc-miR-92b-5p	ENSSSCG00000025047
ssc-miR-92b-5p	ENSSSCG00000005713
ssc-miR-92b-5p	ENSSSCG00000005715
ssc-miR-92b-5p	ENSSSCG00000021724
ssc-miR-92b-5p	ENSSSCG00000004138
ssc-miR-92b-5p	ENSSSCG00000013534
ssc-miR-92b-5p	ENSSSCG00000001885
ssc-miR-92b-5p	ENSSSCG00000016340
ssc-miR-92b-5p	ENSSSCG00000016364
ssc-miR-92b-5p	ENSSSCG00000004328
ssc-miR-92b-5p	ENSSSCG00000027812
ssc-miR-92b-5p	ENSSSCG00000000001
ssc-miR-92b-5p	ENSSSCG00000024391
ssc-miR-92b-5p	ENSSSCG00000025561
ssc-miR-92b-5p	ENSSSCG00000029627
ssc-miR-92b-5p	ENSSSCG00000030358
ssc-miR-92b-5p	ENSSSCG00000002539
ssc-miR-92b-5p	ENSSSCG00000009612
ssc-miR-92b-5p	ENSSSCG00000003360
ssc-miR-92b-5p	ENSSSCG00000029391
ssc-miR-92b-5p	ENSSSCG00000024115
ssc-miR-92b-5p	ENSSSCG00000010792
ssc-miR-92b-5p	ENSSSCG00000012793
ssc-miR-92b-5p	ENSSSCG00000003021
ssc-miR-92b-5p	ENSSSCG00000003353
ssc-miR-92b-5p	ENSSSCG00000023680
ssc-miR-92b-5p	ENSSSCG00000018055
ssc-miR-92b-5p	ENSSSCG00000024480
ssc-miR-92b-5p	ENSSSCG00000005828
ssc-miR-92b-5p	ENSSSCG00000029426
ssc-miR-92b-5p	ENSSSCG00000014822
ssc-miR-92b-5p	ENSSSCG00000029333
ssc-miR-92b-5p	ENSSSCG00000024310
ssc-miR-92b-5p	ENSSSCG00000012732
ssc-miR-92b-5p	ENSSSCG00000008275
ssc-miR-92b-5p	ENSSSCG00000006543
ssc-miR-92b-5p	ENSSSCG00000007559
ssc-miR-92b-5p	ENSSSCG00000013668
ssc-miR-92b-5p	ENSSSCG00000029761
ssc-miR-92b-5p	ENSSSCG00000024500
ssc-miR-92b-5p	ENSSSCG00000026551
ssc-miR-92b-5p	ENSSSCG00000027361
ssc-miR-92b-5p	ENSSSCG00000005853
ssc-miR-92b-5p	ENSSSCG00000002451
ssc-miR-92b-5p	ENSSSCG00000003016
ssc-miR-92b-5p	ENSSSCG00000029901
ssc-miR-92b-5p	ENSSSCG00000007574
ssc-miR-92b-5p	ENSSSCG00000008681
ssc-miR-92b-5p	ENSSSCG00000012844
ssc-miR-92b-5p	ENSSSCG00000012846
ssc-miR-92b-5p	ENSSSCG00000012968
ssc-miR-92b-5p	ENSSSCG00000017340
ssc-miR-92b-5p	ENSSSCG00000024777
ssc-miR-92b-5p	ENSSSCG00000029723
ssc-miR-92b-5p	ENSSSCG00000009761
ssc-miR-92b-5p	ENSSSCG00000024992
ssc-miR-92b-5p	ENSSSCG00000003941
ssc-miR-92b-5p	ENSSSCG00000009512
ssc-miR-92b-5p	ENSSSCG00000029881
ssc-miR-92b-5p	ENSSSCG00000022774
ssc-miR-92b-5p	ENSSSCG00000008691
ssc-miR-92b-5p	ENSSSCG00000024240
ssc-miR-92b-5p	ENSSSCG00000002633
ssc-miR-92b-5p	ENSSSCG00000022963
ssc-miR-92b-5p	ENSSSCG00000002669
ssc-miR-92b-5p	ENSSSCG00000008692
ssc-miR-92b-5p	ENSSSCG00000010098
ssc-miR-92b-5p	ENSSSCG00000014397
ssc-miR-92b-5p	ENSSSCG00000027890
ssc-miR-92b-5p	ENSSSCG00000012878
ssc-miR-92b-5p	ENSSSCG00000014875
ssc-miR-92b-5p	ENSSSCG00000007432
ssc-miR-92b-5p	ENSSSCG00000029570
ssc-miR-92b-5p	ENSSSCG00000026367
ssc-miR-92b-5p	ENSSSCG00000023747
ssc-miR-92b-5p	ENSSSCG00000023496
ssc-miR-92b-5p	ENSSSCG00000014056
ssc-miR-92b-5p	ENSSSCG00000003592
ssc-miR-92b-5p	ENSSSCG00000000965
ssc-miR-92b-5p	ENSSSCG00000014817
ssc-miR-92b-5p	ENSSSCG00000005922
ssc-miR-92b-5p	ENSSSCG00000024578
ssc-miR-92b-5p	ENSSSCG00000002972
ssc-miR-92b-5p	ENSSSCG00000023242
ssc-miR-92b-5p	ENSSSCG00000000075
ssc-miR-92b-5p	ENSSSCG00000025325
ssc-miR-92b-5p	ENSSSCG00000029328
ssc-miR-92b-5p	ENSSSCG00000021361
ssc-miR-92b-5p	ENSSSCG00000003006
ssc-miR-92b-5p	ENSSSCG00000008697
ssc-miR-92b-5p	ENSSSCG00000014303
ssc-miR-92b-5p	ENSSSCG00000023677
ssc-miR-92b-5p	ENSSSCG00000024743
ssc-miR-92b-5p	ENSSSCG00000025893
ssc-miR-92b-5p	ENSSSCG00000016763
ssc-miR-92b-5p	ENSSSCG00000030520
ssc-miR-92b-5p	ENSSSCG00000029189
ssc-miR-92b-5p	ENSSSCG00000015733
ssc-miR-92b-5p	ENSSSCG00000005921
ssc-miR-195	ENSSSCG00000016340
ssc-miR-195	ENSSSCG00000016364
ssc-miR-195	ENSSSCG00000007577
ssc-miR-195	ENSSSCG00000010756
ssc-miR-195	ENSSSCG00000009761
ssc-miR-195	ENSSSCG00000002633
ssc-miR-195	ENSSSCG00000026367
ssc-miR-195	ENSSSCG00000023747
ssc-miR-195	ENSSSCG00000016502
ssc-miR-195	ENSSSCG00000023861
ssc-miR-195	ENSSSCG00000014303
ssc-miR-504	ENSSSCG00000021475
ssc-miR-504	ENSSSCG00000004856
ssc-miR-504	ENSSSCG00000031039
ssc-miR-504	ENSSSCG00000022958
ssc-miR-504	ENSSSCG00000013898
ssc-miR-504	ENSSSCG00000015657
ssc-miR-504	ENSSSCG00000025047
ssc-miR-504	ENSSSCG00000005715
ssc-miR-504	ENSSSCG00000021724
ssc-miR-504	ENSSSCG00000005894
ssc-miR-504	ENSSSCG00000016364
ssc-miR-504	ENSSSCG00000004328
ssc-miR-504	ENSSSCG00000024391
ssc-miR-504	ENSSSCG00000025561
ssc-miR-504	ENSSSCG00000030358
ssc-miR-504	ENSSSCG00000002539
ssc-miR-504	ENSSSCG00000024115
ssc-miR-504	ENSSSCG00000007939
ssc-miR-504	ENSSSCG00000011046
ssc-miR-504	ENSSSCG00000005490
ssc-miR-504	ENSSSCG00000003021
ssc-miR-504	ENSSSCG00000006399
ssc-miR-504	ENSSSCG00000023680
ssc-miR-504	ENSSSCG00000024480
ssc-miR-504	ENSSSCG00000015250
ssc-miR-504	ENSSSCG00000030008
ssc-miR-504	ENSSSCG00000029426
ssc-miR-504	ENSSSCG00000011145
ssc-miR-504	ENSSSCG00000014822
ssc-miR-504	ENSSSCG00000029333
ssc-miR-504	ENSSSCG00000024310
ssc-miR-504	ENSSSCG00000007559
ssc-miR-504	ENSSSCG00000024500
ssc-miR-504	ENSSSCG00000026551
ssc-miR-504	ENSSSCG00000005853
ssc-miR-504	ENSSSCG00000007577
ssc-miR-504	ENSSSCG00000008681
ssc-miR-504	ENSSSCG00000011643
ssc-miR-504	ENSSSCG00000012844
ssc-miR-504	ENSSSCG00000012846
ssc-miR-504	ENSSSCG00000012968
ssc-miR-504	ENSSSCG00000029723
ssc-miR-504	ENSSSCG00000022289
ssc-miR-504	ENSSSCG00000003941
ssc-miR-504	ENSSSCG00000030337
ssc-miR-504	ENSSSCG00000012886
ssc-miR-504	ENSSSCG00000022774
ssc-miR-504	ENSSSCG00000003393
ssc-miR-504	ENSSSCG00000002633
ssc-miR-504	ENSSSCG00000022963
ssc-miR-504	ENSSSCG00000010003
ssc-miR-504	ENSSSCG00000005749
ssc-miR-504	ENSSSCG00000001873
ssc-miR-504	ENSSSCG00000008692
ssc-miR-504	ENSSSCG00000010098
ssc-miR-504	ENSSSCG00000014397
ssc-miR-504	ENSSSCG00000014390
ssc-miR-504	ENSSSCG00000014875
ssc-miR-504	ENSSSCG00000007432
ssc-miR-504	ENSSSCG00000026367
ssc-miR-504	ENSSSCG00000023747
ssc-miR-504	ENSSSCG00000025044
ssc-miR-504	ENSSSCG00000023496
ssc-miR-504	ENSSSCG00000014056
ssc-miR-504	ENSSSCG00000011255
ssc-miR-504	ENSSSCG00000000965
ssc-miR-504	ENSSSCG00000027710
ssc-miR-504	ENSSSCG00000005922
ssc-miR-504	ENSSSCG00000024578
ssc-miR-504	ENSSSCG00000016338
ssc-miR-504	ENSSSCG00000005489
ssc-miR-504	ENSSSCG00000005832
ssc-miR-504	ENSSSCG00000025325
ssc-miR-504	ENSSSCG00000029328
ssc-miR-504	ENSSSCG00000007981
ssc-miR-504	ENSSSCG00000016502
ssc-miR-504	ENSSSCG00000012838
ssc-miR-504	ENSSSCG00000021361
ssc-miR-504	ENSSSCG00000015099
ssc-miR-504	ENSSSCG00000003006
ssc-miR-504	ENSSSCG00000008697
ssc-miR-504	ENSSSCG00000014303
ssc-miR-504	ENSSSCG00000023677
ssc-miR-504	ENSSSCG00000024743
ssc-miR-504	ENSSSCG00000030520
ssc-miR-504	ENSSSCG00000005706
ssc-miR-504	ENSSSCG00000022741
ssc-miR-504	ENSSSCG00000015733
ssc-miR-504	ENSSSCG00000005921
ssc-miR-9	ENSSSCG00000017444
ssc-miR-9	ENSSSCG00000005894
ssc-miR-9	ENSSSCG00000004138
ssc-miR-9	ENSSSCG00000024610
ssc-miR-9	ENSSSCG00000001619
ssc-miR-9	ENSSSCG00000007939
ssc-miR-9	ENSSSCG00000017461
ssc-miR-9	ENSSSCG00000010381
ssc-miR-9	ENSSSCG00000003016
ssc-miR-9	ENSSSCG00000013464
ssc-miR-9	ENSSSCG00000011158
ssc-miR-9	ENSSSCG00000010491
ssc-miR-9	ENSSSCG00000009761
ssc-miR-9	ENSSSCG00000003702
ssc-miR-9	ENSSSCG00000010098
ssc-miR-9	ENSSSCG00000001006
ssc-miR-9	ENSSSCG00000013087
ssc-miR-9	ENSSSCG00000023496
ssc-miR-9	ENSSSCG00000025717
ssc-miR-9	ENSSSCG00000004758
ssc-miR-9	ENSSSCG00000021196
ssc-miR-9	ENSSSCG00000012852
ssc-miR-9	ENSSSCG00000015099
ssc-miR-9	ENSSSCG00000024743
ssc-miR-9	ENSSSCG00000023659
ssc-miR-7138-5p	ENSSSCG00000021073
ssc-miR-7138-5p	ENSSSCG00000005710
ssc-miR-7138-5p	ENSSSCG00000021475
ssc-miR-7138-5p	ENSSSCG00000002640
ssc-miR-7138-5p	ENSSSCG00000031039
ssc-miR-7138-5p	ENSSSCG00000028304
ssc-miR-7138-5p	ENSSSCG00000005713
ssc-miR-7138-5p	ENSSSCG00000021724
ssc-miR-7138-5p	ENSSSCG00000013534
ssc-miR-7138-5p	ENSSSCG00000016340
ssc-miR-7138-5p	ENSSSCG00000017481
ssc-miR-7138-5p	ENSSSCG00000024391
ssc-miR-7138-5p	ENSSSCG00000029627
ssc-miR-7138-5p	ENSSSCG00000002539
ssc-miR-7138-5p	ENSSSCG00000008000
ssc-miR-7138-5p	ENSSSCG00000009612
ssc-miR-7138-5p	ENSSSCG00000013303
ssc-miR-7138-5p	ENSSSCG00000010792
ssc-miR-7138-5p	ENSSSCG00000012793
ssc-miR-7138-5p	ENSSSCG00000003021
ssc-miR-7138-5p	ENSSSCG00000005828
ssc-miR-7138-5p	ENSSSCG00000015250
ssc-miR-7138-5p	ENSSSCG00000024671
ssc-miR-7138-5p	ENSSSCG00000029426
ssc-miR-7138-5p	ENSSSCG00000011145
ssc-miR-7138-5p	ENSSSCG00000014822
ssc-miR-7138-5p	ENSSSCG00000024310
ssc-miR-7138-5p	ENSSSCG00000008275
ssc-miR-7138-5p	ENSSSCG00000006543
ssc-miR-7138-5p	ENSSSCG00000024500
ssc-miR-7138-5p	ENSSSCG00000005853
ssc-miR-7138-5p	ENSSSCG00000029901
ssc-miR-7138-5p	ENSSSCG00000007577
ssc-miR-7138-5p	ENSSSCG00000007574
ssc-miR-7138-5p	ENSSSCG00000008681
ssc-miR-7138-5p	ENSSSCG00000012848
ssc-miR-7138-5p	ENSSSCG00000012844
ssc-miR-7138-5p	ENSSSCG00000017340
ssc-miR-7138-5p	ENSSSCG00000010756
ssc-miR-7138-5p	ENSSSCG00000029723
ssc-miR-7138-5p	ENSSSCG00000024992
ssc-miR-7138-5p	ENSSSCG00000022289
ssc-miR-7138-5p	ENSSSCG00000003941
ssc-miR-7138-5p	ENSSSCG00000029881
ssc-miR-7138-5p	ENSSSCG00000008691
ssc-miR-7138-5p	ENSSSCG00000024240
ssc-miR-7138-5p	ENSSSCG00000002633
ssc-miR-7138-5p	ENSSSCG00000005749
ssc-miR-7138-5p	ENSSSCG00000002669
ssc-miR-7138-5p	ENSSSCG00000001873
ssc-miR-7138-5p	ENSSSCG00000027890
ssc-miR-7138-5p	ENSSSCG00000023747
ssc-miR-7138-5p	ENSSSCG00000025044
ssc-miR-7138-5p	ENSSSCG00000023496
ssc-miR-7138-5p	ENSSSCG00000025717
ssc-miR-7138-5p	ENSSSCG00000027710
ssc-miR-7138-5p	ENSSSCG00000014817
ssc-miR-7138-5p	ENSSSCG00000024578
ssc-miR-7138-5p	ENSSSCG00000005489
ssc-miR-7138-5p	ENSSSCG00000005832
ssc-miR-7138-5p	ENSSSCG00000023242
ssc-miR-7138-5p	ENSSSCG00000000075
ssc-miR-7138-5p	ENSSSCG00000016502
ssc-miR-7138-5p	ENSSSCG00000012838
ssc-miR-7138-5p	ENSSSCG00000015099
ssc-miR-7138-5p	ENSSSCG00000008697
ssc-miR-7138-5p	ENSSSCG00000025893
ssc-miR-7138-5p	ENSSSCG00000016763
ssc-miR-7138-5p	ENSSSCG00000022741
ssc-miR-9785-5p	ENSSSCG00000021475
ssc-miR-9785-5p	ENSSSCG00000029852
ssc-miR-9785-5p	ENSSSCG00000021521
ssc-miR-9785-5p	ENSSSCG00000017444
ssc-miR-9785-5p	ENSSSCG00000004856
ssc-miR-9785-5p	ENSSSCG00000002640
ssc-miR-9785-5p	ENSSSCG00000031039
ssc-miR-9785-5p	ENSSSCG00000022958
ssc-miR-9785-5p	ENSSSCG00000028304
ssc-miR-9785-5p	ENSSSCG00000005713
ssc-miR-9785-5p	ENSSSCG00000005715
ssc-miR-9785-5p	ENSSSCG00000005894
ssc-miR-9785-5p	ENSSSCG00000001885
ssc-miR-9785-5p	ENSSSCG00000017481
ssc-miR-9785-5p	ENSSSCG00000004328
ssc-miR-9785-5p	ENSSSCG00000027812
ssc-miR-9785-5p	ENSSSCG00000008000
ssc-miR-9785-5p	ENSSSCG00000003360
ssc-miR-9785-5p	ENSSSCG00000029391
ssc-miR-9785-5p	ENSSSCG00000001619
ssc-miR-9785-5p	ENSSSCG00000010792
ssc-miR-9785-5p	ENSSSCG00000011046
ssc-miR-9785-5p	ENSSSCG00000003353
ssc-miR-9785-5p	ENSSSCG00000006399
ssc-miR-9785-5p	ENSSSCG00000023680
ssc-miR-9785-5p	ENSSSCG00000024480
ssc-miR-9785-5p	ENSSSCG00000015250
ssc-miR-9785-5p	ENSSSCG00000030008
ssc-miR-9785-5p	ENSSSCG00000024671
ssc-miR-9785-5p	ENSSSCG00000011145
ssc-miR-9785-5p	ENSSSCG00000008275
ssc-miR-9785-5p	ENSSSCG00000006543
ssc-miR-9785-5p	ENSSSCG00000029761
ssc-miR-9785-5p	ENSSSCG00000027361
ssc-miR-9785-5p	ENSSSCG00000007574
ssc-miR-9785-5p	ENSSSCG00000008681
ssc-miR-9785-5p	ENSSSCG00000011643
ssc-miR-9785-5p	ENSSSCG00000013464
ssc-miR-9785-5p	ENSSSCG00000012848
ssc-miR-9785-5p	ENSSSCG00000017340
ssc-miR-9785-5p	ENSSSCG00000010756
ssc-miR-9785-5p	ENSSSCG00000024992
ssc-miR-9785-5p	ENSSSCG00000003941
ssc-miR-9785-5p	ENSSSCG00000030337
ssc-miR-9785-5p	ENSSSCG00000012886
ssc-miR-9785-5p	ENSSSCG00000022774
ssc-miR-9785-5p	ENSSSCG00000003393
ssc-miR-9785-5p	ENSSSCG00000008691
ssc-miR-9785-5p	ENSSSCG00000024240
ssc-miR-9785-5p	ENSSSCG00000002633
ssc-miR-9785-5p	ENSSSCG00000022963
ssc-miR-9785-5p	ENSSSCG00000002669
ssc-miR-9785-5p	ENSSSCG00000001873
ssc-miR-9785-5p	ENSSSCG00000027890
ssc-miR-9785-5p	ENSSSCG00000007432
ssc-miR-9785-5p	ENSSSCG00000026367
ssc-miR-9785-5p	ENSSSCG00000023747
ssc-miR-9785-5p	ENSSSCG00000025044
ssc-miR-9785-5p	ENSSSCG00000003592
ssc-miR-9785-5p	ENSSSCG00000011255
ssc-miR-9785-5p	ENSSSCG00000009997
ssc-miR-9785-5p	ENSSSCG00000025717
ssc-miR-9785-5p	ENSSSCG00000000965
ssc-miR-9785-5p	ENSSSCG00000027710
ssc-miR-9785-5p	ENSSSCG00000014817
ssc-miR-9785-5p	ENSSSCG00000005922
ssc-miR-9785-5p	ENSSSCG00000016338
ssc-miR-9785-5p	ENSSSCG00000004758
ssc-miR-9785-5p	ENSSSCG00000002972
ssc-miR-9785-5p	ENSSSCG00000021196
ssc-miR-9785-5p	ENSSSCG00000005832
ssc-miR-9785-5p	ENSSSCG00000000075
ssc-miR-9785-5p	ENSSSCG00000027970
ssc-miR-9785-5p	ENSSSCG00000029328
ssc-miR-9785-5p	ENSSSCG00000007981
ssc-miR-9785-5p	ENSSSCG00000010949
ssc-miR-9785-5p	ENSSSCG00000012838
ssc-miR-9785-5p	ENSSSCG00000021361
ssc-miR-9785-5p	ENSSSCG00000023861
ssc-miR-9785-5p	ENSSSCG00000016763
ssc-miR-9785-5p	ENSSSCG00000030520
ssc-miR-9785-5p	ENSSSCG00000029189
ssc-miR-9785-5p	ENSSSCG00000005706
ssc-miR-9785-5p	ENSSSCG00000022741
ssc-miR-9785-5p	ENSSSCG00000005385
ssc-miR-9785-5p	ENSSSCG00000005921
novel:13_7211	circRNA010867
novel:13_7211	circRNA013607
novel:13_7211	circRNA013186
novel:1_954	circRNA013186
novel:1_954	circRNA009929
novel:3_18386	circRNA009929
novel:3_18386	circRNA013607
novel:3_18386	circRNA001418
novel:6_23476	circRNA013607
novel:6_23476	circRNA005936
novel:8_28121	circRNA013186
novel:8_28121	circRNA011575
novel:GL893595.2_33582	circRNA001418
novel:GL893595.2_33582	circRNA005936
ssc-miR-124a	circRNA001418
ssc-miR-125b	circRNA013607
ssc-miR-133a-3p	circRNA005936
ssc-miR-195	circRNA011575
ssc-miR-7138-5p	circRNA010867
ssc-miR-7138-5p	circRNA009929
ssc-miR-9	circRNA000675
ssc-miR-9-1	circRNA000675
ssc-miR-9-2	circRNA000675
ssc-miR-92b-5p	circRNA013607
ssc-miR-92b-5p	circRNA010867
ssc-miR-125b	MSTRG.6505
ssc-miR-125b	MSTRG.62621
ssc-miR-125b	MSTRG.114143
ssc-miR-125b	MSTRG.167556
ssc-miR-125b	MSTRG.193828
ssc-miR-125b	MSTRG.193828
ssc-miR-216	MSTRG.29255
ssc-miR-216	MSTRG.131826
ssc-miR-216	MSTRG.167556
ssc-miR-124a	MSTRG.22387
ssc-miR-124a	MSTRG.35089
ssc-miR-124a	MSTRG.64366
ssc-miR-124a	MSTRG.143042
ssc-miR-124a	MSTRG.143042
ssc-miR-124a	MSTRG.143066
ssc-miR-124a	MSTRG.148660
ssc-miR-124a	MSTRG.167556
ssc-miR-9-1	MSTRG.6505
ssc-miR-9-1	MSTRG.15305
ssc-miR-9-1	MSTRG.15650
ssc-miR-9-1	MSTRG.62621
ssc-miR-9-1	MSTRG.92448
ssc-miR-9-1	MSTRG.115641
ssc-miR-9-1	MSTRG.131811
ssc-miR-9-2	MSTRG.6505
ssc-miR-9-2	MSTRG.15305
ssc-miR-9-2	MSTRG.15650
ssc-miR-9-2	MSTRG.62621
ssc-miR-9-2	MSTRG.92448
ssc-miR-9-2	MSTRG.115641
ssc-miR-9-2	MSTRG.131811
ssc-miR-133a-3p	MSTRG.22387
ssc-miR-133a-3p	MSTRG.34744
ssc-miR-133a-3p	MSTRG.96234
ssc-miR-133a-3p	MSTRG.96557
ssc-miR-133a-3p	MSTRG.110743
ssc-miR-664-3p	MSTRG.6505
ssc-miR-664-3p	MSTRG.6505
ssc-miR-664-3p	MSTRG.6505
ssc-miR-92a	MSTRG.15650
ssc-miR-92a	MSTRG.131826
ssc-miR-92a	MSTRG.150860
ssc-miR-92b-5p	MSTRG.15305
ssc-miR-92b-5p	MSTRG.22387
ssc-miR-92b-5p	MSTRG.24435
ssc-miR-92b-5p	MSTRG.34744
ssc-miR-92b-5p	MSTRG.64366
ssc-miR-92b-5p	MSTRG.92448
ssc-miR-92b-5p	MSTRG.96234
ssc-miR-92b-5p	MSTRG.96557
ssc-miR-92b-5p	MSTRG.110743
ssc-miR-92b-5p	MSTRG.114143
ssc-miR-92b-5p	MSTRG.122559
ssc-miR-92b-5p	MSTRG.131826
ssc-miR-92b-5p	MSTRG.143042
ssc-miR-92b-5p	MSTRG.143042
ssc-miR-92b-5p	MSTRG.143066
ssc-miR-92b-5p	MSTRG.148660
ssc-miR-92b-5p	MSTRG.167556
ssc-miR-92b-5p	MSTRG.213616
ssc-miR-92b-5p	MSTRG.213616
ssc-miR-504	MSTRG.29255
ssc-miR-504	MSTRG.35089
ssc-miR-504	MSTRG.35089
ssc-miR-504	MSTRG.110743
ssc-miR-504	MSTRG.114143
ssc-miR-504	MSTRG.115641
ssc-miR-504	MSTRG.122559
ssc-miR-504	MSTRG.148660
ssc-miR-504	MSTRG.150860
ssc-miR-504	MSTRG.213616
ssc-miR-504	MSTRG.213616
ssc-miR-504	MSTRG.213616
ssc-miR-9	MSTRG.6505
ssc-miR-9	MSTRG.15305
ssc-miR-9	MSTRG.15650
ssc-miR-9	MSTRG.62621
ssc-miR-9	MSTRG.92448
ssc-miR-9	MSTRG.131811
ssc-miR-7138-5p	MSTRG.22387
ssc-miR-7138-5p	MSTRG.24435
ssc-miR-7138-5p	MSTRG.34744
ssc-miR-7138-5p	MSTRG.34744
ssc-miR-7138-5p	MSTRG.96234
ssc-miR-7138-5p	MSTRG.110743
ssc-miR-7138-5p	MSTRG.122559
ssc-miR-7138-5p	MSTRG.131826
ssc-miR-7138-5p	MSTRG.193828
ssc-miR-7138-5p	MSTRG.213616
ssc-miR-7138-5p	MSTRG.213616
ssc-miR-7138-5p	MSTRG.213616
ssc-miR-7138-5p	MSTRG.213616
ssc-miR-9785-5p	MSTRG.15650
ssc-miR-9785-5p	MSTRG.24435
ssc-miR-9785-5p	MSTRG.24692
ssc-miR-9785-5p	MSTRG.24692
ssc-miR-9785-5p	MSTRG.24692
ssc-miR-9785-5p	MSTRG.24692
ssc-miR-9785-5p	MSTRG.24692
ssc-miR-9785-5p	MSTRG.29255
ssc-miR-9785-5p	MSTRG.34744
ssc-miR-9785-5p	MSTRG.34744
ssc-miR-9785-5p	MSTRG.64366
ssc-miR-9785-5p	MSTRG.96234
ssc-miR-9785-5p	MSTRG.96557
ssc-miR-9785-5p	MSTRG.110743
ssc-miR-9785-5p	MSTRG.122559
ssc-miR-9785-5p	MSTRG.131811
ssc-miR-9785-5p	MSTRG.131826
ssc-miR-9785-5p	MSTRG.143042
ssc-miR-9785-5p	MSTRG.143042
ssc-miR-9785-5p	MSTRG.143066
ssc-miR-9785-5p	MSTRG.148660
ssc-miR-9785-5p	MSTRG.150860
ssc-miR-9785-5p	MSTRG.213616
ssc-miR-9785-5p	MSTRG.213616
ssc-miR-9785-5p	MSTRG.213616

## Sheet: Pearson's correlation
Pearson’s correlation coefficient of selected miRNA lncRNA circRNA and mRNA
	miR.125b	miR.504	miR.92b.5P	miR.9	MSTRG62621	MSTRG114143	MSTRG167556	circ000675	circ13607	FADD	EGFL7	PER2	CELSR1
miR.125b	1	0.968228	0.90999	0.656696	0.786048	0.839614	0.801116	0.804918	0.815332	0.869036	0.473548	0.747447	0.731679
miR.504	0.968228	1	0.897268	0.638462	0.850288	0.948561	0.914088	0.923491	0.915538	0.950023	0.576577	0.787177	0.807728
miR.92b.5P	0.90999	0.897268	1	0.907098	0.945142	0.786802	0.671639	0.827467	0.891087	0.916004	0.765994	0.948027	0.918439
miR.9	0.656696	0.638462	0.907098	1	0.900628	0.534334	0.360294	0.640855	0.755226	0.754001	0.876611	0.956454	0.90247
MSTRG62621	0.786048	0.850288	0.945142	0.900628	1	0.83824	0.712309	0.909452	0.964403	0.957695	0.916028	0.988009	0.996498
MSTRG114143	0.839614	0.948561	0.786802	0.534334	0.83824	1	0.979707	0.984197	0.949494	0.958032	0.631255	0.746724	0.812971
MSTRG167556	0.801116	0.914088	0.671639	0.360294	0.712309	0.979707	1	0.931862	0.867598	0.882646	0.471526	0.59959	0.679866
circ000675	0.804918	0.923491	0.827467	0.640855	0.909452	0.984197	0.931862	1	0.987033	0.983214	0.758057	0.83442	0.895861
circ13607	0.815332	0.915538	0.891087	0.755226	0.964403	0.949494	0.867598	0.987033	1	0.994981	0.835706	0.912057	0.954408
FADD	0.869036	0.950023	0.916004	0.754001	0.957695	0.958032	0.882646	0.983214	0.994981	1	0.792816	0.905311	0.939622
EGFL7	0.473548	0.576577	0.765994	0.876611	0.916028	0.631255	0.471526	0.758057	0.835706	0.792816	1	0.930259	0.945918
PER2	0.747447	0.787177	0.948027	0.956454	0.988009	0.746724	0.59959	0.83442	0.912057	0.905311	0.930259	1	0.987827
CELSR1	0.731679	0.807728	0.918439	0.90247	0.996498	0.812971	0.679866	0.895861	0.954408	0.939622	0.945918	0.987827	1
